# Supplementary material
Source: MDPI journal article supplement (https://www.mdpi.com/2312-7481/7/7/105)

# checkCIF/PLATON report

You have not supplied any structure factors. As a result the full set of tests cannot be run.

THIS REPORT IS FOR GUIDANCE ONLY. IF USED AS PART OF A REVIEW PROCEDURE FOR PUBLICATION, IT SHOULD NOT REPLACE THE EXPERTISE OF AN EXPERIENCED CRYSTALLOGRAPHIC REFEREE.

No syntax errors found.      CIF dictionary      Interpreting this report

## Datablock: 1

---

Bond precision:    C-C = 0.0065 Å                      Wavelength=0.71073

Cell:                      a=20.651(3)              b=20.651(3)              c=13.641(3)  
                                alpha=90              beta=90              gamma=90  
Temperature:              293 K

|                | Calculated             | Reported               |
|----------------|------------------------|------------------------|
| Volume         | 5817(2)                | 5818(2)                |
| Space group    | P 42/n                 | P 42/n                 |
| Hall group     | -P 4bc                 | -P 4bc                 |
| Moiety formula | C58 H36 Fe2 Mn N12 O14 | ?                      |
| Sum formula    | C58 H36 Fe2 Mn N12 O14 | C58 H44 Fe2 Mn N12 O14 |
| Mr             | 1291.63                | 1299.69                |
| Dx,g cm-3      | 1.475                  | 1.484                  |
| Z              | 4                      | 4                      |
| Mu (mm-1)      | 0.783                  | 0.783                  |
| F000           | 2628.0                 | 2660.0                 |
| F000'          | 2633.20                |                        |
| h,k,lmax       | 26,26,17               | 26,26,17               |
| Nref           | 6650                   | 6637                   |
| Tmin,Tmax      | 0.855,0.889            | 0.347,1.000            |
| Tmin'          | 0.855                  |                        |

Correction method= # Reported T Limits: Tmin=0.347 Tmax=1.000  
AbsCorr = EMPIRICAL

Data completeness= 0.998                      Theta(max)= 27.450

R(reflections)= 0.0579( 3771)              wR2(reflections)= 0.1972( 6637)

S = 1.090                      Npar= 412

---

The following ALERTS were generated. Each ALERT has the format

**test-name\_ALERT\_alert-type\_alert-level.**

Click on the hyperlinks for more details of the test.

---

## 🟡 Alert level B

PLAT601\_ALERT\_2\_B Unit Cell Contains Solvent Accessible VOIDS of .

108 Ang\*\*3

---

## 🟢 Alert level C

PLAT041\_ALERT\_1\_C Calc. and Reported SumFormula Strings Differ Please Check  
PLAT043\_ALERT\_1\_C Calculated and Reported Mol. Weight Differ by .. 8.06 Check  
PLAT068\_ALERT\_1\_C Reported F000 Differs from Calcd (or Missing)... Please Check  
PLAT234\_ALERT\_4\_C Large Hirshfeld Difference O7B --C29B . 0.18 Ang.  
PLAT241\_ALERT\_2\_C High 'MainMol' Ueq as Compared to Neighbors of 01 Check  
PLAT241\_ALERT\_2\_C High 'MainMol' Ueq as Compared to Neighbors of 06 Check  
PLAT242\_ALERT\_2\_C Low 'MainMol' Ueq as Compared to Neighbors of Mn1 Check  
PLAT341\_ALERT\_3\_C Low Bond Precision on C-C Bonds ..... 0.00654 Ang.

---

## 🟠 Alert level G

FORMU01\_ALERT\_2\_G There is a discrepancy between the atom counts in the  
\_chemical\_formula\_sum and the formula from the \_atom\_site\* data.  
Atom count from \_chemical\_formula\_sum: C58 H44 Fe2 Mn1 N12 O14  
Atom count from the \_atom\_site data: C58 H36 Fe2 Mn1 N12 O14  
CELLZ01\_ALERT\_1\_G Difference between formula and atom\_site contents detected.  
CELLZ01\_ALERT\_1\_G WARNING: H atoms missing from atom site list. Is this intentional?  
From the CIF: \_cell\_formula\_units\_Z 4  
From the CIF: \_chemical\_formula\_sum C58 H44 Fe2 Mn N12 O14  
TEST: Compare cell contents of formula and atom\_site data

| atom | Z*formula | cif sites | diff  |
|------|-----------|-----------|-------|
| C    | 232.00    | 232.00    | 0.00  |
| H    | 176.00    | 144.00    | 32.00 |
| Fe   | 8.00      | 8.00      | 0.00  |
| Mn   | 4.00      | 4.00      | 0.00  |
| N    | 48.00     | 48.00     | 0.00  |
| O    | 56.00     | 56.00     | 0.00  |

PLAT004\_ALERT\_5\_G Polymeric Structure Found with Maximum Dimension 1 Info  
PLAT199\_ALERT\_1\_G Reported \_cell\_measurement\_temperature ..... (K) 293 Check  
PLAT200\_ALERT\_1\_G Reported \_diffrn\_ambient\_temperature ..... (K) 293 Check  
PLAT232\_ALERT\_2\_G Hirshfeld Test Diff (M-X) Fe1 --N3 . 6.4 s.u.  
PLAT301\_ALERT\_3\_G Main Residue Disorder .....(Resd 1 ) 5% Note  
PLAT315\_ALERT\_2\_G Singly Bonded Carbon Detected (H-atoms Missing). C29B Check  
PLAT315\_ALERT\_2\_G Singly Bonded Carbon Detected (H-atoms Missing). C29A Check  
PLAT883\_ALERT\_1\_G No Info/Value for \_atom\_sites\_solution\_primary . Please Do !

---

- 0 **ALERT level A** = Most likely a serious problem - resolve or explain  
1 **ALERT level B** = A potentially serious problem, consider carefully  
8 **ALERT level C** = Check. Ensure it is not caused by an omission or oversight  
11 **ALERT level G** = General information/check it is not something unexpected

- 8 ALERT type 1 CIF construction/syntax error, inconsistent or missing data  
8 ALERT type 2 Indicator that the structure model may be wrong or deficient  
2 ALERT type 3 Indicator that the structure quality may be low  
1 ALERT type 4 Improvement, methodology, query or suggestion  
1 ALERT type 5 Informative message, check
- 

## Datablock: 2

---

Bond precision: C-C = 0.0063 A

Wavelength=0.71073

Cell: a=9.2247(6) b=13.2300(7) c=14.2577(8)  
 alpha=82.3377(15) beta=79.666(2) gamma=85.466(2)  
 Temperature: 293 K

|                | Calculated                        | Reported            |
|----------------|-----------------------------------|---------------------|
| Volume         | 1693.82(17)                       | 1693.83(17)         |
| Space group    | P -1                              | P -1                |
| Hall group     | -P 1                              | -P 1                |
| Moiety formula | C62 H50 Mn3 N14 O14, 2(C3 H7 N O) | ?                   |
| Sum formula    | C68 H64 Mn3 N16 O16               | C68 H64 Mn3 N16 O16 |
| Mr             | 1526.17                           | 1526.17             |
| Dx, g cm-3     | 1.496                             | 1.496               |
| Z              | 1                                 | 1                   |
| Mu (mm-1)      | 0.633                             | 0.633               |
| F000           | 787.0                             | 787.0               |
| F000'          | 788.33                            |                     |
| h,k,lmax       | 11,17,18                          | 11,17,18            |
| Nref           | 7754                              | 7655                |
| Tmin,Tmax      | 0.872,0.939                       | 0.057,1.000         |
| Tmin'          | 0.710                             |                     |

Correction method= # Reported T Limits: Tmin=0.057 Tmax=1.000  
 AbsCorr = EMPIRICAL

Data completeness= 0.987 Theta(max)= 27.483

R(reflections)= 0.0485( 4597) wR2(reflections)= 0.1631( 7655)

S = 1.153 Npar= 467

The following ALERTS were generated. Each ALERT has the format  
**test-name\_ALERT\_alert-type\_alert-level.**  
 Click on the hyperlinks for more details of the test.

### ● Alert level C

|                   |                                        |           |                                 |   |              |
|-------------------|----------------------------------------|-----------|---------------------------------|---|--------------|
| PLAT230_ALERT_2_C | Hirshfeld Test Diff for                | O6        | --N6                            | . | 5.5 s.u.     |
| PLAT230_ALERT_2_C | Hirshfeld Test Diff for                | C12       | --C13                           | . | 5.5 s.u.     |
| PLAT241_ALERT_2_C | High                                   | 'MainMol' | Ueq as Compared to Neighbors of |   | O2 Check     |
| PLAT242_ALERT_2_C | Low                                    | 'MainMol' | Ueq as Compared to Neighbors of |   | Mn2 Check    |
| PLAT242_ALERT_2_C | Low                                    | 'MainMol' | Ueq as Compared to Neighbors of |   | N7 Check     |
| PLAT244_ALERT_4_C | Low                                    | 'Solvent' | Ueq as Compared to Neighbors of |   | N8 Check     |
| PLAT244_ALERT_4_C | Low                                    | 'Solvent' | Ueq as Compared to Neighbors of |   | C32 Check    |
| PLAT260_ALERT_2_C | Large Average Ueq of Residue Including |           | O8                              |   | 0.106 Check  |
| PLAT341_ALERT_3_C | Low Bond Precision on                  | C-C Bonds | .....                           |   | 0.00629 Ang. |

### ● Alert level G

|                   |                                                  |           |     |       |
|-------------------|--------------------------------------------------|-----------|-----|-------|
| PLAT004_ALERT_5_G | Polymeric Structure Found with Maximum Dimension |           | 1   | Info  |
| PLAT199_ALERT_1_G | Reported _cell_measurement_temperature           | ..... (K) | 293 | Check |
| PLAT200_ALERT_1_G | Reported _diffrn_ambient_temperature             | ..... (K) | 293 | Check |

|                   |                                                               |      |              |
|-------------------|---------------------------------------------------------------|------|--------------|
| PLAT380_ALERT_4_G | Incorrectly? Oriented X(sp <sup>2</sup> )-Methyl Moiety ..... | C30  | Check        |
| PLAT380_ALERT_4_G | Incorrectly? Oriented X(sp <sup>2</sup> )-Methyl Moiety ..... | C33  | Check        |
| PLAT380_ALERT_4_G | Incorrectly? Oriented X(sp <sup>2</sup> )-Methyl Moiety ..... | C34  | Check        |
| PLAT794_ALERT_5_G | Tentative Bond Valency for Mn1 (I) .                          | 1.02 | Info         |
| PLAT794_ALERT_5_G | Tentative Bond Valency for Mn2 (II) .                         | 2.20 | Info         |
| PLAT883_ALERT_1_G | No Info/Value for _atom_sites_solution_primary .              |      | Please Do !  |
| PLAT933_ALERT_2_G | Number of OMIT Records in Embedded .res File ...              | 20   | Note         |
| PLAT941_ALERT_3_G | Average HKL Measurement Multiplicity .....                    | 2.2  | Low          |
| PLAT965_ALERT_2_G | The SHELXL WEIGHT Optimisation has not Converged              |      | Please Check |

---

0 **ALERT level A** = Most likely a serious problem - resolve or explain  
 0 **ALERT level B** = A potentially serious problem, consider carefully  
 9 **ALERT level C** = Check. Ensure it is not caused by an omission or oversight  
 12 **ALERT level G** = General information/check it is not something unexpected

3 ALERT type 1 CIF construction/syntax error, inconsistent or missing data  
 8 ALERT type 2 Indicator that the structure model may be wrong or deficient  
 2 ALERT type 3 Indicator that the structure quality may be low  
 5 ALERT type 4 Improvement, methodology, query or suggestion  
 3 ALERT type 5 Informative message, check

---

It is advisable to attempt to resolve as many as possible of the alerts in all categories. Often the minor alerts point to easily fixed oversights, errors and omissions in your CIF or refinement strategy, so attention to these fine details can be worthwhile. In order to resolve some of the more serious problems it may be necessary to carry out additional measurements or structure refinements. However, the purpose of your study may justify the reported deviations and the more serious of these should normally be commented upon in the discussion or experimental section of a paper or in the "special\_details" fields of the CIF. checkCIF was carefully designed to identify outliers and unusual parameters, but every test has its limitations and alerts that are not important in a particular case may appear. Conversely, the absence of alerts does not guarantee there are no aspects of the results needing attention. It is up to the individual to critically assess their own results and, if necessary, seek expert advice.

### Publication of your CIF in IUCr journals

A basic structural check has been run on your CIF. These basic checks will be run on all CIFs submitted for publication in IUCr journals (*Acta Crystallographica*, *Journal of Applied Crystallography*, *Journal of Synchrotron Radiation*); however, if you intend to submit to *Acta Crystallographica Section C* or *E* or *IUCrData*, you should make sure that full publication checks are run on the final version of your CIF prior to submission.

### Publication of your CIF in other journals

Please refer to the *Notes for Authors* of the relevant journal for any special instructions relating to CIF submission.

---

**PLATON version of 18/09/2020; check.def file version of 20/08/2020**

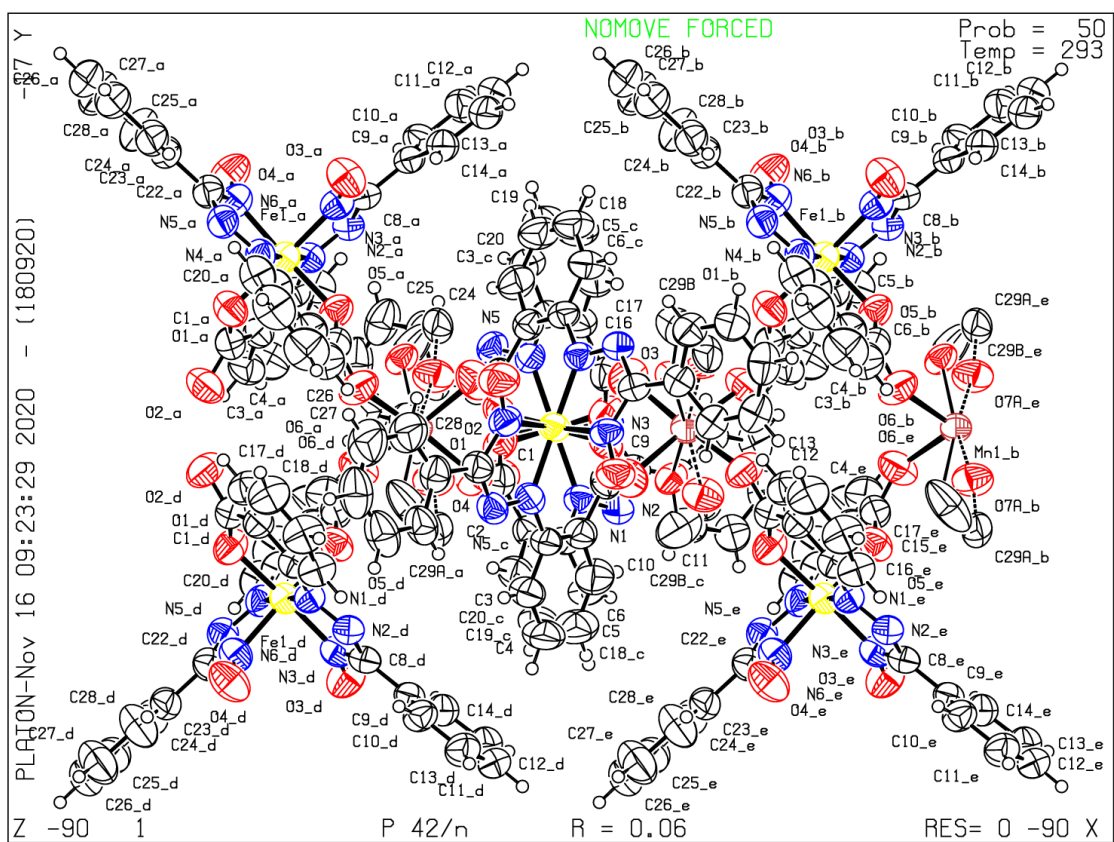

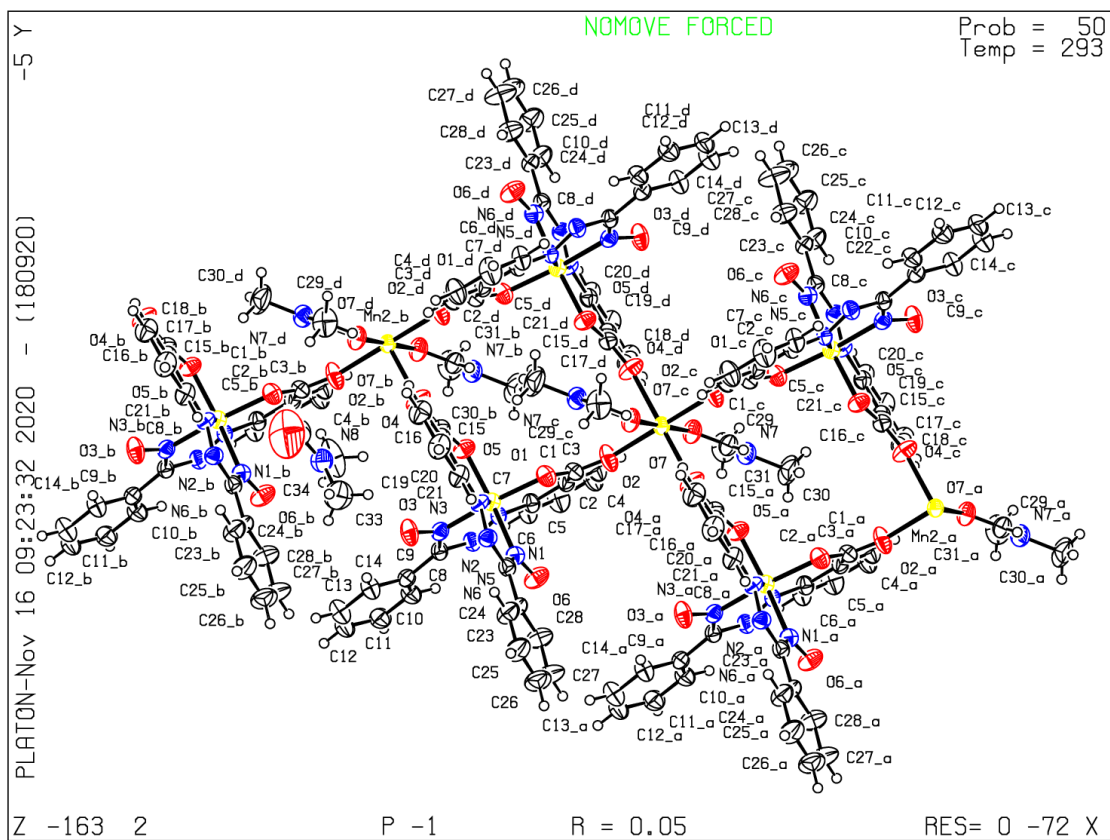

Supplement: s1 [file s1]
