# Supplementary material
Source: MDPI journal article supplement (https://www.mdpi.com/2312-7481/7/7/105)
Supplement: s1 [file s1]

# Synthesis, Crystal Structure and Magnetic Properties of 1D Chain Complexes Based on Azo Carboxylate Oxime Ligand

Min Zeng,<sup>1</sup> Xi Chen,<sup>1,¶</sup> Hui-Zhong Kou<sup>1,\*</sup>

<sup>1</sup> Department of Chemistry, Tsinghua University, Beijing 100084, P. R. China

¶ deceased

\* Correspondence: kouhz@mail.tsinghua.edu.cn.

## BVS calculations

### Bond-valence sum values for Fe and Mn ions in [M(L)<sub>2</sub>]:

For a metal ion, the bond-valence sum (BVS) can be calculated according to Equation (1), where  $i$  is the coordination bond around the metal ion,  $r$  is the measured bond length,  $r_0$  and  $B$  are empirical parameters.  $B$  is constant, 0.037 nm.

$$\text{BVS} = \sum \exp[(r_0 - r_i)/B] \quad (1)$$

Table S1. The  $r_0$  values of some metal-ligand (M-L) bonds in HS metal ions

| M-L                      | $r_0/\text{nm}$ | M-L                      | $r_0/\text{nm}$ |
|--------------------------|-----------------|--------------------------|-----------------|
| <b>Mn<sup>2+</sup>-O</b> | <b>0.1765</b>   | <b>Mn<sup>2+</sup>-N</b> | <b>0.1849</b>   |
| <b>Mn<sup>3+</sup>-O</b> | <b>0.1732</b>   | <b>Mn<sup>3+</sup>-N</b> | <b>0.1837</b>   |
| Mn <sup>4+</sup> -O      | 0.1750          | Mn <sup>4+</sup> -N      | 0.1822          |
| Mn <sup>5+</sup> -O      | 0.1773          | Mn <sup>5+</sup> -N      | 0.1845          |
| Fe <sup>2+</sup> -O      | 0.1700          | Fe <sup>2+</sup> -N      | 0.1769          |
| <b>Fe<sup>3+</sup>-O</b> | <b>0.1765</b>   | <b>Fe<sup>3+</sup>-N</b> | <b>0.1815</b>   |

1. For Fe ion in Fe(L)<sub>2</sub> unit of complex **1**, Fe(III) ion is coordinated with two oxygen atoms and four nitrogen atoms. Assuming the band valence of Fe ion is HS +3,  $r_0(\text{Fe}^{3+}\text{-O}) = 0.1765$ ,  $r_0(\text{Fe}^{3+}\text{-N}) = 0.1815$ .

$$\begin{aligned} \text{BVS} = & \exp[(0.1765-0.1935)/0.037] + \exp[(0.1765-0.1929)/0.037] + \\ & \exp[(0.1815-0.1895)/0.037] + \exp[(0.1815-0.1887)/0.037] + \\ & \exp[(0.1815-0.1904)/0.037] + \exp[(0.1815-0.1895)/0.037] = 4.49 \end{aligned}$$

**This divergence indicates that Fe ion in complex 1 is LS +3, instead of HS Fe(III).**

2. For Mn ion in Mn(L)<sub>2</sub> unit of complex **2**, Mn ion is coordinated with two

oxygen atoms and four nitrogen atoms. Assuming the band valence of Mn ion is HS +3,  $r_0(\text{Mn}^{3+}\text{-O}) = 0.1732$ ,  $r_0(\text{Mn}^{3+}\text{-N}) = 0.1837$ .

$$\begin{aligned} \text{BVS} = & \exp[(0.1732-0.1939)/0.037] + \exp[(0.1732-0.1929)/0.037] + \\ & \exp[(0.1837-0.1924)/0.037] + \exp[(0.1837-0.1950)/0.037] + \\ & \exp[(0.1837-0.1934)/0.037] + \exp[(0.1837-0.1953)/0.037] = 4.19. \end{aligned}$$

This value deviates greatly from the average value of HS Mn<sup>III</sup> ions, indicating that Mn in complex **2** is LS +3, rather than HS Mn(III).

3. For Mn1 ion in complex **1**, Mn1 ion is coordinated with six oxygen atoms.

Assuming the band valence of Mn1 ion is HS +2,  $r_0(\text{Mn}^{2+}\text{-O}) = 0.1765$ .

$$\begin{aligned} \text{BVS} = & \exp[(0.1765-0.2183)/0.037] + \exp[(0.1765-0.2183)/0.037] + \\ & \exp[(0.1765-0.2192)/0.037] + \exp[(0.1765-0.2192)/0.037] + \\ & \exp[(0.1765-0.2181)/0.037] + \exp[(0.1765-0.2193)/0.037] = 1.92. \end{aligned}$$

This value is in good agreement with the average oxidation state of HS Mn<sup>II</sup> ions, indicating Mn1 in complex **1** is HS +2.

4. For Mn2 ion in complex **2**, Mn2 ion is coordinated with six oxygen atoms.

Assuming the band valence of Mn2 ion is HS +2,  $r_0(\text{Mn}^{2+}\text{-O}) = 0.1765$ .

$$\begin{aligned} \text{BVS} = & \exp[(0.1765-0.2151)/0.037] + \exp[(0.1765-0.2151)/0.037] + \\ & \exp[(0.1765-0.2162)/0.037] + \exp[(0.1765-0.2162)/0.037] + \\ & \exp[(0.1765-0.2167)/0.037] + \exp[(0.1765-0.2167)/0.037] = 2.06. \end{aligned}$$

This value is in good agreement with the average oxidation state of HS Mn<sup>II</sup> ions, indicating Mn2 in complex **2** is HS +2.

Table S2. The results calculated by SHAPE software.

| Complex                   | Lable       | Symmetry             | Shape                         | Deviation<br>value |
|---------------------------|-------------|----------------------|-------------------------------|--------------------|
| <b>1-Fe<sup>III</sup></b> | HP-6        | D <sub>6h</sub>      | Hexagon                       | 29.090             |
|                           | PPY-6       | C <sub>5v</sub>      | Pentagonal pyramid            | 25.277             |
|                           | <b>OC-6</b> | <b>O<sub>h</sub></b> | <b>Octahedron</b>             | <b>0.588</b>       |
|                           | TPR-6       | D <sub>3h</sub>      | Trigonal prism                | 13.523             |
|                           | JPPY-6      | C <sub>5v</sub>      | Johnson pentagonal pyramid J2 | 29.018             |
| <b>1-Mn<sup>II</sup></b>  | HP-6        | D <sub>6h</sub>      | Hexagon                       | 32.164             |
|                           | PPY-6       | C <sub>5v</sub>      | Pentagonal pyramid            | 24.152             |
|                           | <b>OC-6</b> | <b>O<sub>h</sub></b> | <b>Octahedron</b>             | <b>1.459</b>       |
|                           | TPR-6       | D <sub>3h</sub>      | Trigonal prism                | 9.607              |
|                           | JPPY-6      | C <sub>5v</sub>      | Johnson pentagonal pyramid J2 | 27.953             |
| <b>2-Mn<sup>III</sup></b> | HP-6        | D <sub>6h</sub>      | Hexagon                       | 32.687             |
|                           | PPY-6       | C <sub>5v</sub>      | Pentagonal pyramid            | 26.027             |
|                           | <b>OC-6</b> | <b>O<sub>h</sub></b> | <b>Octahedron</b>             | <b>0.807</b>       |
|                           | TPR-6       | D <sub>3h</sub>      | Trigonal prism                | 12.797             |
|                           | JPPY-6      | C <sub>5v</sub>      | Johnson pentagonal pyramid J2 | 30.224             |
| <b>2-Mn<sup>II</sup></b>  | HP-6        | D <sub>6h</sub>      | Hexagon                       | 30.968             |
|                           | PPY-6       | C <sub>5v</sub>      | Pentagonal pyramid            | 29.242             |
|                           | <b>OC-6</b> | <b>O<sub>h</sub></b> | <b>Octahedron</b>             | <b>0.085</b>       |
|                           | TPR-6       | D <sub>3h</sub>      | Trigonal prism                | 16.328             |
|                           | JPPY-6      | C <sub>5v</sub>      | Johnson pentagonal pyramid J2 | 32.612             |

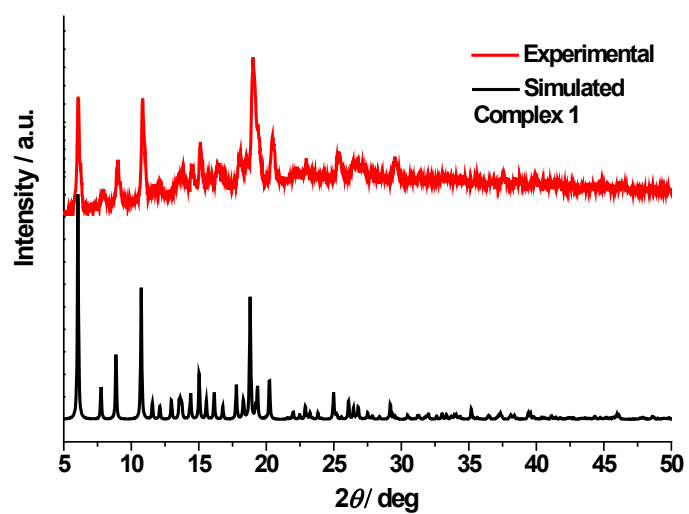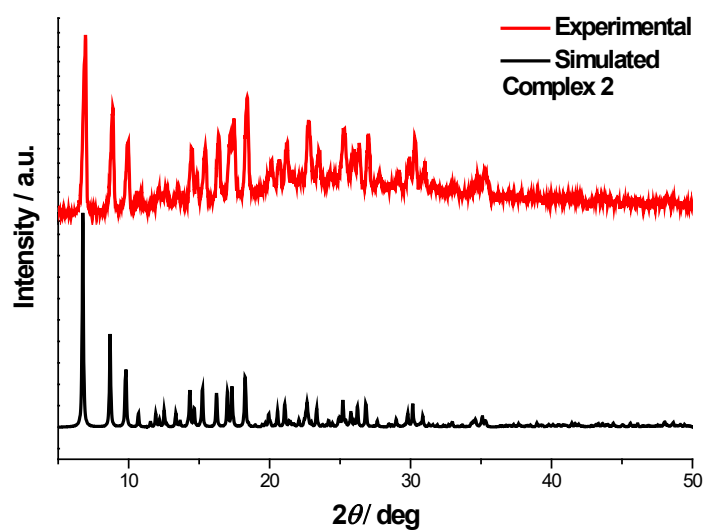

Figure S1. PXRD patterns for complexes 1 and 2 in the range of 5-50 degrees.

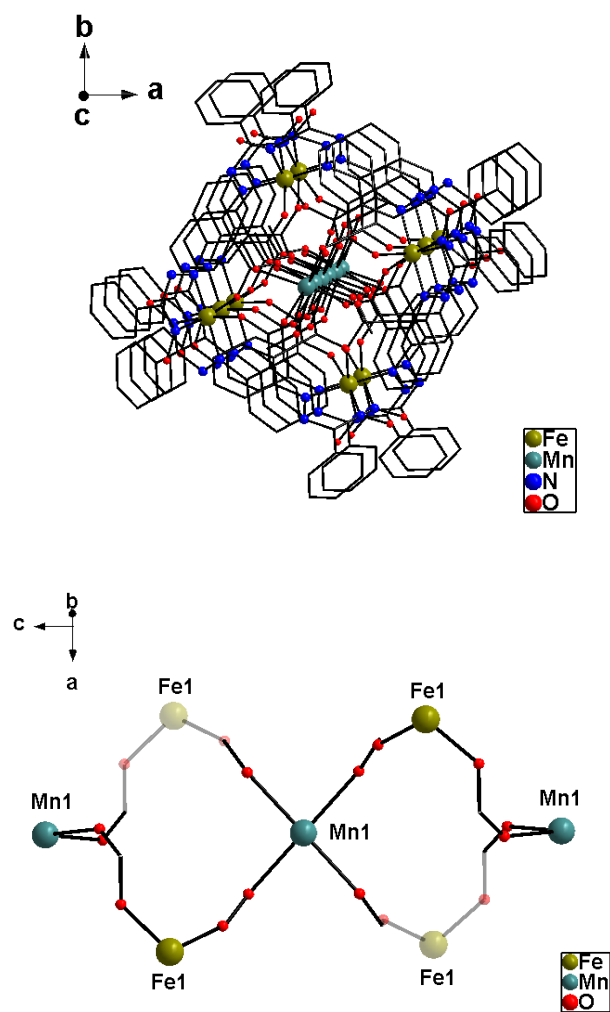

Figure S2. (top) Side view of complex **1** along *c* axis; (bottom) View of the 1D skeleton of Complex **1**. (Fe: dark yellow; Mn: cyan; C: gray; N: blue; O: red.)

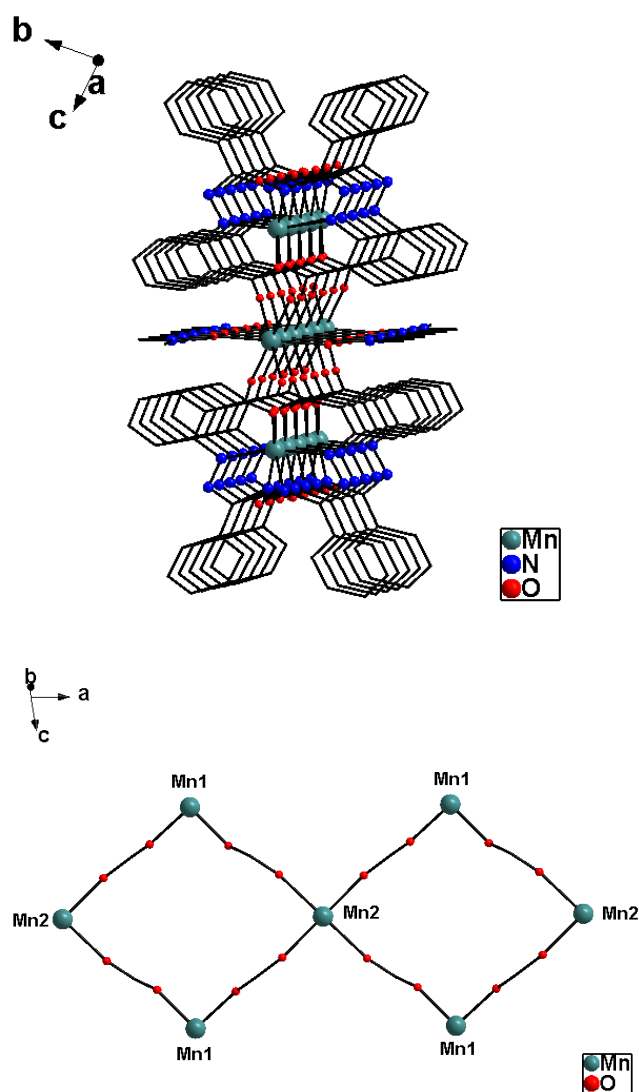

Figure S3. (top) Side view of complex 2 along *a* axis. (bottom) View of the 1D skeleton of Complex 2. (Mn: cyan; C: gray; N: blue; O: red.)

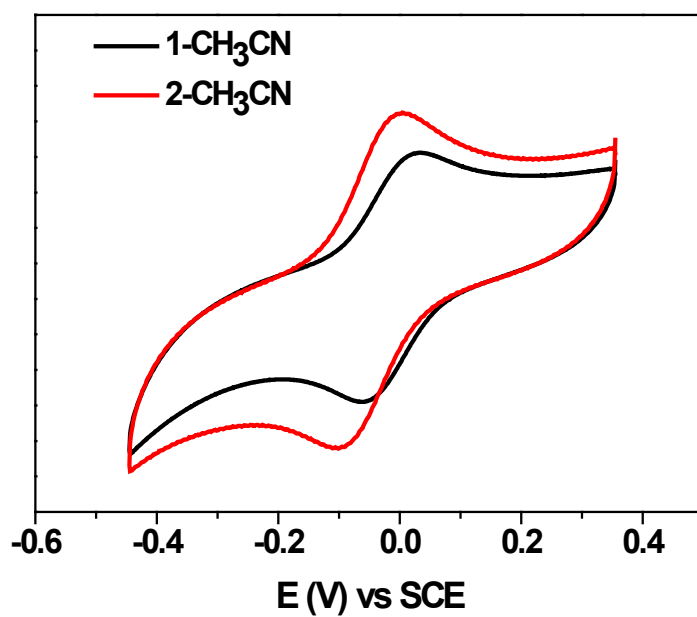

Figure S4. Cyclic voltammograms (scan rate  $50 \text{ mV s}^{-1}$ ) of  $10^{-3} \text{ M}$  acetonitrile solutions of complexes **1** and **2** at 298 K.

$E(\text{SCE}) = E(\text{NHE}) - 0.242$ ,  $E(\text{Ag}/\text{AgCl, sat. KCl}) = E(\text{NHE}) - 0.197$ . Thus,  $E(\text{SCE}) = E(\text{Ag}/\text{AgCl, sat. KCl}) - 0.045$ .

$E_{1/2}$  is calculated as the average of anodic ( $E_{\text{pa}}$ ) and cathodic ( $E_{\text{pc}}$ ) peak potentials.



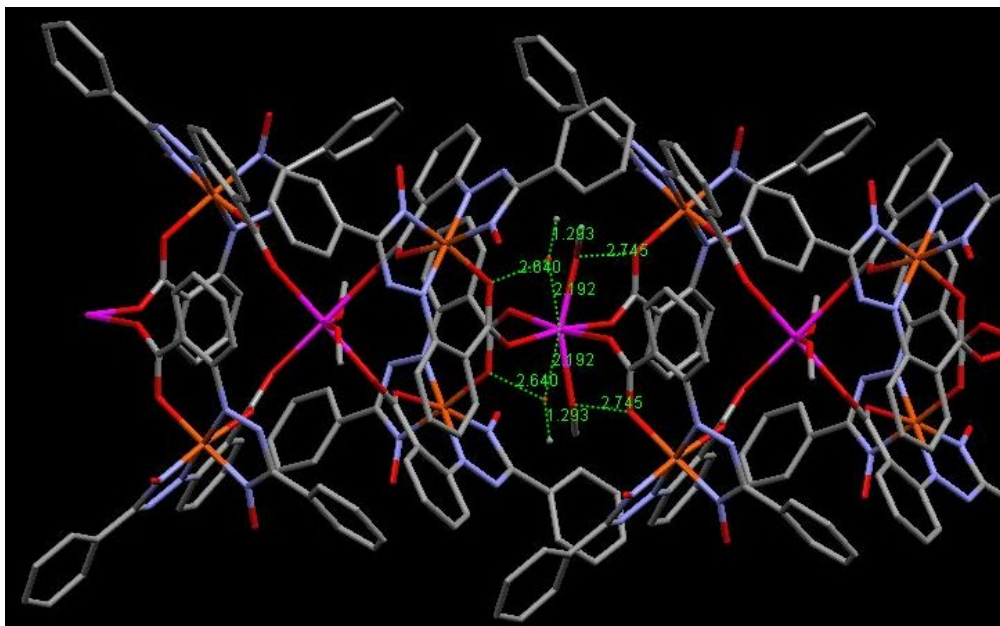

Figure S5. The intrachain hydrogen bonding interaction between the disordered methanol oxygen and the carboxylate oxygen atoms of L<sup>2-</sup> in complex **1**.
