# Supplementary material
Source: MDPI journal article supplement (https://www.mdpi.com/2312-7481/7/7/105)
Supplement: s1 [file s1]

Archive with 4 entries (4 files):
- 2044111.cif
- checkcif.pdf
- 2044110.cif
- magnetochemistry-1288774 SI-R2.pdf
