# Supplementary material
Source: MDPI journal article supplement (https://www.mdpi.com/2312-7481/7/7/105)
Supplement: s1 [file s1 › 2044110.cif]

#===================================================================

# SUBMISSION DETAILS
loop_
_publ_contact_author_name     'Dr. Hui-Zhong Kou'
_publ_contact_author_address
;
Department of Chemistry
Tsinghua University
Beijing 100084
People's Republic of China
;
_publ_contact_author_email     'kouhz@mail.tsinghua.edu.cn'
_publ_contact_author_Phone     '86-10-62771748'

_publ_requested_journal        'Magnetochemistry'
_publ_requested_category        FM
_publ_requested_coeditor_name    ?
_publ_contact_letter
;
;

#====================================================================== 
data_1
 
_audit_creation_method            SHELXL-2013
_chemical_name_systematic
;
 ?
;
_chemical_name_common             ?
_chemical_melting_point           ?
_chemical_formula_moiety          ?
_chemical_formula_sum
 'C58 H44 Fe2 Mn N12 O14' 
_chemical_formula_weight          1299.69

loop_
 _atom_type_symbol
 _atom_type_description
 _atom_type_scat_dispersion_real
 _atom_type_scat_dispersion_imag
 _atom_type_scat_source
 'C'  'C'   0.0033   0.0016
 'International Tables Vol C Tables 4.2.6.8 and 6.1.1.4'
 'H'  'H'   0.0000   0.0000
 'International Tables Vol C Tables 4.2.6.8 and 6.1.1.4'
 'N'  'N'   0.0061   0.0033
 'International Tables Vol C Tables 4.2.6.8 and 6.1.1.4'
 'O'  'O'   0.0106   0.0060
 'International Tables Vol C Tables 4.2.6.8 and 6.1.1.4'
 'Mn'  'Mn'   0.3368   0.7283
 'International Tables Vol C Tables 4.2.6.8 and 6.1.1.4'
 'Fe'  'Fe'   0.3463   0.8444
 'International Tables Vol C Tables 4.2.6.8 and 6.1.1.4'
 
_space_group_crystal_system       tetragonal
_space_group_IT_number            86
_space_group_name_H-M_alt         'P 42/n'
_space_group_name_Hall            '-P 4bc'
 
_shelx_space_group_comment
;
The symmetry employed for this shelxl refinement is uniquely defined
by the following loop, which should always be used as a source of
symmetry information in preference to the above space-group names.
They are only intended as comments.
;
 
loop_
 _space_group_symop_operation_xyz
 'x, y, z'
 '-x+1/2, -y+1/2, z'
 '-y, x+1/2, z+1/2'
 'y+1/2, -x, z+1/2'
 '-x, -y, -z'
 'x-1/2, y-1/2, -z'
 'y, -x-1/2, -z-1/2'
 '-y-1/2, x, -z-1/2'
 
_cell_length_a                    20.651(3)
_cell_length_b                    20.651(3)
_cell_length_c                    13.641(3)
_cell_angle_alpha                 90
_cell_angle_beta                  90
_cell_angle_gamma                 90
_cell_volume                      5818(2)
_cell_formula_units_Z             4
_cell_measurement_temperature     293(2)
_cell_measurement_reflns_used     24782 
_cell_measurement_theta_min       3.12 
_cell_measurement_theta_max       27.42 
 
_exptl_crystal_description        plate 
_exptl_crystal_colour             'dark purple' 
_exptl_crystal_density_meas       ? 
_exptl_crystal_density_method     ?              
_exptl_crystal_density_diffrn     1.484          
_exptl_crystal_F_000              2660
_exptl_transmission_factor_min    ?                                             
_exptl_transmission_factor_max    ?                                             
_exptl_crystal_size_max           0.20 
_exptl_crystal_size_mid           0.20 
_exptl_crystal_size_min           0.15 
_exptl_absorpt_coefficient_mu     0.783
_shelx_estimated_absorpt_T_min    ? 
_shelx_estimated_absorpt_T_max    ? 
_exptl_absorpt_correction_type    Empirical 
_exptl_absorpt_correction_T_min   0.347 
_exptl_absorpt_correction_T_max   1.000 
_exptl_absorpt_process_details    '(ABSCOR; Higashi, 1995)' 
 
_exptl_special_details
;
 ?
;
 
_diffrn_ambient_temperature       293(2)
_diffrn_radiation_wavelength      0.71073
_diffrn_radiation_type            MoK\a
_diffrn_source                    'fine-focus sealed tube'                       
_diffrn_measurement_device_type   'Rigaku R-AXIS-RAPID' 
_diffrn_measurement_method        \w 
_diffrn_detector_area_resol_mean  10.00 
_diffrn_reflns_number             51164
_diffrn_reflns_av_unetI/netI      0.0383
_diffrn_reflns_av_R_equivalents   0.0612
_diffrn_reflns_limit_h_min        -26
_diffrn_reflns_limit_h_max        26
_diffrn_reflns_limit_k_min        -26
_diffrn_reflns_limit_k_max        22
_diffrn_reflns_limit_l_min        -17
_diffrn_reflns_limit_l_max        17
_diffrn_reflns_theta_min          3.119
_diffrn_reflns_theta_max          27.450
_diffrn_reflns_theta_full         25.242
_diffrn_measured_fraction_theta_max   0.998
_diffrn_measured_fraction_theta_full  0.998
_diffrn_reflns_Laue_measured_fraction_max    0.998
_diffrn_reflns_Laue_measured_fraction_full   0.998
_diffrn_reflns_point_group_measured_fraction_max   0.998
_diffrn_reflns_point_group_measured_fraction_full  0.998
_reflns_number_total              6637
_reflns_number_gt                 3771
_reflns_threshold_expression      'I > 2\s(I)'
_reflns_Friedel_coverage          0.000
_reflns_Friedel_fraction_max      .
_reflns_Friedel_fraction_full     .
 
_reflns_special_details
;
 Reflections were merged by SHELXL according to the crystal
 class for the calculation of statistics and refinement.
 
 _reflns_Friedel_fraction is defined as the number of unique
 Friedel pairs measured divided by the number that would be
 possible theoretically, ignoring centric projections and
 systematic absences.
;
 
_computing_data_collection        'crystalstructure 3.6.0 (Rigaku/MSC, 2004)'
_computing_cell_refinement        'crystalstructure 3.6.0 (Rigaku/MSC, 2004)'
_computing_data_reduction         'Crystalstructure 2004'  
_computing_structure_solution     'SHELXL-2013 (Sheldrick, 2013)' 
_computing_structure_refinement   'SHELXL-2013 (Sheldrick, 2013)'
_computing_molecular_graphics     ?
_computing_publication_material   ?
 
_refine_special_details
;
 ?
;
_refine_ls_structure_factor_coef  Fsqd
_refine_ls_matrix_type            full
_refine_ls_weighting_scheme       calc
_refine_ls_weighting_details
;
 w=1/[\s^2^(Fo^2^)+(0.1071P)^2^]
 where P=(Fo^2^+2Fc^2^)/3
;
_atom_sites_solution_primary      ?
_atom_sites_solution_secondary    ?
_atom_sites_solution_hydrogens    geom
_refine_ls_hydrogen_treatment     constr
_refine_ls_extinction_method      none
_refine_ls_extinction_coef        .
_refine_ls_number_reflns          6637
_refine_ls_number_parameters      412
_refine_ls_number_restraints      0
_refine_ls_R_factor_all           0.1027
_refine_ls_R_factor_gt            0.0579
_refine_ls_wR_factor_ref          0.1972
_refine_ls_wR_factor_gt           0.1639
_refine_ls_goodness_of_fit_ref    1.090
_refine_ls_restrained_S_all       1.090
_refine_ls_shift/su_max           0.000
_refine_ls_shift/su_mean          0.000
 
loop_
 _atom_site_label
 _atom_site_type_symbol
 _atom_site_fract_x
 _atom_site_fract_y
 _atom_site_fract_z
 _atom_site_U_iso_or_equiv
 _atom_site_adp_type
 _atom_site_occupancy
 _atom_site_site_symmetry_order  
 _atom_site_calc_flag
 _atom_site_refinement_flags_posn
 _atom_site_refinement_flags_adp
 _atom_site_refinement_flags_occupancy
 _atom_site_disorder_assembly
 _atom_site_disorder_group
Fe1 Fe 0.30992(2) 0.54986(2) 0.04428(4) 0.0589(2) Uani 1 1 d . . . . .
Mn1 Mn 0.2500 0.7500 0.28890(5) 0.0612(2) Uani 1 2 d S T P . .
C1 C 0.2182(2) 0.6321(2) -0.0569(3) 0.0697(10) Uani 1 1 d . . . . .
C2 C 0.16275(17) 0.60179(18) -0.0045(3) 0.0631(9) Uani 1 1 d . . . . .
C3 C 0.1009(2) 0.6279(2) -0.0268(3) 0.0823(12) Uani 1 1 d . . . . .
H3A H 0.0974 0.6626 -0.0698 0.099 Uiso 1 1 calc R U . . .
C4 C 0.0460(2) 0.6020(3) 0.0151(4) 0.0945(14) Uani 1 1 d . . . . .
H4A H 0.0056 0.6188 -0.0013 0.113 Uiso 1 1 calc R U . . .
C5 C 0.04993(19) 0.5527(2) 0.0793(4) 0.0898(13) Uani 1 1 d . . . . .
H5A H 0.0123 0.5365 0.1076 0.108 Uiso 1 1 calc R U . . .
C6 C 0.10933(17) 0.52584(19) 0.1041(3) 0.0748(10) Uani 1 1 d . . . . .
H6A H 0.1116 0.4916 0.1481 0.090 Uiso 1 1 calc R U . . .
C7 C 0.16581(15) 0.55108(17) 0.0617(2) 0.0591(8) Uani 1 1 d . . . . .
C8 C 0.28464(15) 0.46398(15) 0.1927(3) 0.0567(8) Uani 1 1 d . . . . .
C9 C 0.29010(17) 0.41928(16) 0.2754(2) 0.0599(8) Uani 1 1 d . . . . .
C10 C 0.2376(2) 0.37762(18) 0.2954(3) 0.0737(10) Uani 1 1 d . . . . .
H10A H 0.2008 0.3786 0.2561 0.088 Uiso 1 1 calc R U . . .
C11 C 0.2412(2) 0.33526(19) 0.3740(3) 0.0839(12) Uani 1 1 d . . . . .
H11A H 0.2069 0.3073 0.3864 0.101 Uiso 1 1 calc R U . . .
C12 C 0.2940(3) 0.3341(2) 0.4329(3) 0.0847(12) Uani 1 1 d . . . . .
H12A H 0.2957 0.3050 0.4848 0.102 Uiso 1 1 calc R U . . .
C13 C 0.3448(2) 0.3753(2) 0.4167(3) 0.0826(11) Uani 1 1 d . . . . .
H13A H 0.3801 0.3753 0.4591 0.099 Uiso 1 1 calc R U . . .
C14 C 0.3437(2) 0.41721(18) 0.3370(3) 0.0715(10) Uani 1 1 d . . . . .
H14A H 0.3790 0.4440 0.3248 0.086 Uiso 1 1 calc R U . . .
C15 C 0.3431(2) 0.67091(19) 0.1391(3) 0.0708(10) Uani 1 1 d . . . . .
C16 C 0.40849(19) 0.67237(19) 0.0927(3) 0.0708(10) Uani 1 1 d . . . . .
C17 C 0.4483(2) 0.7241(2) 0.1189(3) 0.0938(14) Uani 1 1 d . . . . .
H17A H 0.4323 0.7561 0.1602 0.113 Uiso 1 1 calc R U . . .
C18 C 0.5110(3) 0.7286(3) 0.0845(5) 0.1120(17) Uani 1 1 d . . . . .
H18A H 0.5368 0.7635 0.1028 0.134 Uiso 1 1 calc R U . . .
C19 C 0.5351(2) 0.6823(3) 0.0243(4) 0.1055(16) Uani 1 1 d . . . . .
H19A H 0.5777 0.6853 0.0027 0.127 Uiso 1 1 calc R U . . .
C20 C 0.4967(2) 0.6299(2) -0.0060(3) 0.0844(12) Uani 1 1 d . . . . .
H20A H 0.5131 0.5990 -0.0490 0.101 Uiso 1 1 calc R U . . .
C21 C 0.43327(17) 0.62496(19) 0.0294(3) 0.0660(9) Uani 1 1 d . . . . .
C22 C 0.37994(18) 0.48700(19) -0.0977(3) 0.0675(9) Uani 1 1 d . . . . .
C23 C 0.4020(2) 0.4432(2) -0.1766(3) 0.0748(11) Uani 1 1 d . . . . .
C24 C 0.4673(2) 0.4451(2) -0.2022(3) 0.0875(13) Uani 1 1 d . . . . .
H24A H 0.4951 0.4738 -0.1710 0.105 Uiso 1 1 calc R U . . .
C25 C 0.4906(3) 0.4036(3) -0.2748(4) 0.1062(17) Uani 1 1 d . . . . .
H25A H 0.5345 0.4035 -0.2897 0.127 Uiso 1 1 calc R U . . .
C26 C 0.4503(4) 0.3637(3) -0.3238(4) 0.116(2) Uani 1 1 d . . . . .
H26A H 0.4664 0.3365 -0.3724 0.139 Uiso 1 1 calc R U . . .
C27 C 0.3864(4) 0.3633(3) -0.3020(4) 0.126(2) Uani 1 1 d . . . . .
H27A H 0.3585 0.3366 -0.3373 0.151 Uiso 1 1 calc R U . . .
C28 C 0.3615(3) 0.4024(3) -0.2268(4) 0.1098(17) Uani 1 1 d . . . . .
H28A H 0.3178 0.4007 -0.2111 0.132 Uiso 1 1 calc R U . . .
N1 N 0.22690(12) 0.52519(13) 0.0903(2) 0.0579(7) Uani 1 1 d . . . . .
N2 N 0.22578(13) 0.48404(13) 0.1624(2) 0.0590(7) Uani 1 1 d . . . . .
N3 N 0.33523(13) 0.48980(14) 0.1413(2) 0.0636(7) Uani 1 1 d . . . . .
N4 N 0.39420(14) 0.57239(14) -0.0008(2) 0.0628(7) Uani 1 1 d . . . . .
N5 N 0.41741(15) 0.53697(16) -0.0707(2) 0.0682(8) Uani 1 1 d . . . . .
N6 N 0.32303(15) 0.48176(17) -0.0467(2) 0.0701(8) Uani 1 1 d . . . . .
O1 O 0.27368(13) 0.60497(15) -0.05643(19) 0.0809(8) Uani 1 1 d . . . . .
O2 O 0.20892(15) 0.68349(15) -0.1034(2) 0.0933(9) Uani 1 1 d . . . . .
O3 O 0.39300(12) 0.47304(15) 0.1578(2) 0.0878(9) Uani 1 1 d . . . . .
O4 O 0.28411(16) 0.43566(16) -0.0581(2) 0.0988(10) Uani 1 1 d . . . . .
O5 O 0.30908(13) 0.61904(12) 0.13934(19) 0.0760(7) Uani 1 1 d . . . . .
O6 O 0.32314(15) 0.72079(14) 0.1811(2) 0.0931(9) Uani 1 1 d . . . . .
O7A O 0.3097(4) 0.8346(3) 0.3199(9) 0.089(4) Uani 0.477(15) 1 d . . P A 1
C29A C 0.3005(7) 0.8960(4) 0.3280(7) 0.079(3) Uani 0.477(15) 1 d . . P A 1
O7B O 0.2850(3) 0.8485(3) 0.2608(6) 0.065(2) Uani 0.523(15) 1 d . . P A 2
C29B C 0.3400(8) 0.8770(8) 0.2748(13) 0.143(8) Uani 0.523(15) 1 d . . P A 2
 
loop_
 _atom_site_aniso_label
 _atom_site_aniso_U_11
 _atom_site_aniso_U_22
 _atom_site_aniso_U_33
 _atom_site_aniso_U_23
 _atom_site_aniso_U_13
 _atom_site_aniso_U_12
Fe1 0.0505(3) 0.0643(3) 0.0620(3) -0.0016(2) 0.0047(2) 0.0003(2)
Mn1 0.0687(5) 0.0492(4) 0.0656(5) 0.000 0.000 -0.0088(3)
C1 0.076(3) 0.073(2) 0.060(2) 0.0038(18) -0.0007(18) 0.0043(19)
C2 0.061(2) 0.065(2) 0.063(2) -0.0009(18) -0.0049(17) 0.0042(16)
C3 0.071(3) 0.086(3) 0.090(3) 0.008(2) -0.015(2) 0.013(2)
C4 0.059(3) 0.110(4) 0.114(4) 0.006(3) -0.014(2) 0.012(2)
C5 0.051(2) 0.104(3) 0.114(3) 0.006(3) -0.004(2) 0.000(2)
C6 0.055(2) 0.076(2) 0.093(3) 0.008(2) 0.0031(19) -0.0034(18)
C7 0.0467(18) 0.063(2) 0.068(2) -0.0041(17) -0.0036(15) 0.0020(15)
C8 0.0503(18) 0.0502(18) 0.070(2) -0.0077(15) -0.0043(16) 0.0024(14)
C9 0.067(2) 0.0480(18) 0.064(2) -0.0059(15) -0.0012(17) 0.0037(15)
C10 0.082(3) 0.060(2) 0.079(3) 0.0070(19) -0.009(2) -0.0075(18)
C11 0.103(3) 0.064(2) 0.084(3) 0.006(2) -0.004(3) -0.014(2)
C12 0.122(4) 0.061(2) 0.071(2) 0.0049(19) -0.007(3) 0.011(2)
C13 0.097(3) 0.075(3) 0.075(3) -0.007(2) -0.015(2) 0.011(2)
C14 0.076(2) 0.068(2) 0.070(2) -0.0038(19) -0.0103(19) 0.0031(18)
C15 0.083(3) 0.067(2) 0.062(2) -0.0034(18) 0.0052(19) -0.006(2)
C16 0.068(2) 0.071(2) 0.073(2) 0.0063(19) -0.0019(19) -0.0092(18)
C17 0.105(4) 0.077(3) 0.099(3) 0.000(2) -0.004(3) -0.028(2)
C18 0.098(4) 0.102(4) 0.137(5) 0.009(4) -0.011(3) -0.037(3)
C19 0.075(3) 0.120(4) 0.122(4) 0.023(3) 0.002(3) -0.034(3)
C20 0.067(2) 0.100(3) 0.087(3) 0.013(2) 0.006(2) -0.012(2)
C21 0.055(2) 0.076(2) 0.067(2) 0.0089(18) 0.0009(17) -0.0112(17)
C22 0.059(2) 0.081(3) 0.063(2) -0.0004(19) 0.0042(17) 0.0110(18)
C23 0.081(3) 0.081(3) 0.063(2) -0.004(2) -0.002(2) 0.020(2)
C24 0.083(3) 0.107(3) 0.072(3) 0.005(2) 0.015(2) 0.032(2)
C25 0.119(4) 0.114(4) 0.086(3) 0.007(3) 0.031(3) 0.046(3)
C26 0.161(6) 0.111(4) 0.076(3) -0.013(3) 0.014(4) 0.041(4)
C27 0.146(6) 0.130(5) 0.102(4) -0.043(3) 0.000(4) 0.008(4)
C28 0.101(4) 0.131(4) 0.097(4) -0.042(3) 0.001(3) 0.009(3)
N1 0.0501(15) 0.0610(16) 0.0626(16) 0.0019(14) -0.0005(13) 0.0021(12)
N2 0.0551(16) 0.0557(16) 0.0663(17) -0.0005(14) 0.0005(13) -0.0018(12)
N3 0.0466(15) 0.0682(18) 0.0760(19) -0.0092(15) 0.0002(14) 0.0055(13)
N4 0.0607(17) 0.0697(19) 0.0582(17) 0.0060(14) 0.0059(14) 0.0048(14)
N5 0.0613(18) 0.079(2) 0.0644(18) 0.0024(16) 0.0076(15) 0.0093(16)
N6 0.0623(19) 0.075(2) 0.073(2) -0.0117(15) -0.0043(15) -0.0048(15)
O1 0.0678(17) 0.097(2) 0.0774(18) 0.0216(14) 0.0142(13) 0.0159(15)
O2 0.096(2) 0.090(2) 0.094(2) 0.0322(17) 0.0100(17) 0.0166(17)
O3 0.0501(15) 0.113(2) 0.100(2) 0.0231(17) -0.0039(14) 0.0079(14)
O4 0.084(2) 0.100(2) 0.112(2) -0.0373(19) 0.0079(17) -0.0181(18)
O5 0.0840(18) 0.0677(16) 0.0762(17) -0.0111(13) 0.0242(13) -0.0126(13)
O6 0.105(2) 0.0713(18) 0.103(2) -0.0218(16) 0.0202(18) -0.0064(16)
O7A 0.094(5) 0.058(4) 0.115(8) 0.000(4) 0.007(5) -0.020(3)
C29A 0.115(9) 0.062(5) 0.060(5) -0.007(4) -0.006(5) -0.031(5)
O7B 0.078(4) 0.049(3) 0.069(4) 0.013(2) -0.017(3) -0.018(2)
C29B 0.148(13) 0.142(12) 0.140(13) 0.082(11) -0.060(11) -0.069(11)
 
_geom_special_details
;
 All esds (except the esd in the dihedral angle between two l.s. planes)
 are estimated using the full covariance matrix.  The cell esds are taken
 into account individually in the estimation of esds in distances, angles
 and torsion angles; correlations between esds in cell parameters are only
 used when they are defined by crystal symmetry.  An approximate (isotropic)
 treatment of cell esds is used for estimating esds involving l.s. planes.
;
 
loop_
 _geom_bond_atom_site_label_1
 _geom_bond_atom_site_label_2
 _geom_bond_distance
 _geom_bond_site_symmetry_2
 _geom_bond_publ_flag
Fe1 N3 1.887(3) . ?
Fe1 N6 1.895(3) . ?
Fe1 N1 1.895(3) . ?
Fe1 N4 1.904(3) . ?
Fe1 O5 1.929(2) . ?
Fe1 O1 1.935(3) . ?
Mn1 O7A 2.181(7) 2_565 ?
Mn1 O7A 2.181(7) . ?
Mn1 O2 2.183(3) 3_655 ?
Mn1 O2 2.183(3) 4_465 ?
Mn1 O6 2.192(3) . ?
Mn1 O6 2.192(3) 2_565 ?
Mn1 O7B 2.193(5) 2_565 ?
Mn1 O7B 2.193(5) . ?
C1 O2 1.251(4) . ?
C1 O1 1.275(5) . ?
C1 C2 1.488(5) . ?
C2 C7 1.384(5) . ?
C2 C3 1.419(5) . ?
C3 C4 1.377(6) . ?
C3 H3A 0.9300 . ?
C4 C5 1.346(6) . ?
C4 H4A 0.9300 . ?
C5 C6 1.388(5) . ?
C5 H5A 0.9300 . ?
C6 C7 1.402(5) . ?
C6 H6A 0.9300 . ?
C7 N1 1.425(4) . ?
C8 N2 1.349(4) . ?
C8 N3 1.367(4) . ?
C8 C9 1.462(5) . ?
C9 C14 1.390(5) . ?
C9 C10 1.410(5) . ?
C10 C11 1.385(5) . ?
C10 H10A 0.9300 . ?
C11 C12 1.354(6) . ?
C11 H11A 0.9300 . ?
C12 C13 1.371(6) . ?
C12 H12A 0.9300 . ?
C13 C14 1.389(6) . ?
C13 H13A 0.9300 . ?
C14 H14A 0.9300 . ?
C15 O6 1.249(4) . ?
C15 O5 1.281(4) . ?
C15 C16 1.492(5) . ?
C16 C17 1.395(5) . ?
C16 C21 1.402(5) . ?
C17 C18 1.381(7) . ?
C17 H17A 0.9300 . ?
C18 C19 1.356(8) . ?
C18 H18A 0.9300 . ?
C19 C20 1.404(6) . ?
C19 H19A 0.9300 . ?
C20 C21 1.399(5) . ?
C20 H20A 0.9300 . ?
C21 N4 1.414(5) . ?
C22 N5 1.341(5) . ?
C22 N6 1.370(5) . ?
C22 C23 1.478(5) . ?
C23 C28 1.369(6) . ?
C23 C24 1.393(6) . ?
C24 C25 1.396(6) . ?
C24 H24A 0.9300 . ?
C25 C26 1.348(8) . ?
C25 H25A 0.9300 . ?
C26 C27 1.353(8) . ?
C26 H26A 0.9300 . ?
C27 C28 1.403(7) . ?
C27 H27A 0.9300 . ?
C28 H28A 0.9300 . ?
N1 N2 1.300(4) . ?
N3 O3 1.263(3) . ?
N4 N5 1.294(4) . ?
N6 O4 1.256(4) . ?
O2 Mn1 2.183(3) 3_654 ?
O7A C29A 1.287(12) . ?
O7B C29B 1.292(14) . ?
 
loop_
 _geom_angle_atom_site_label_1
 _geom_angle_atom_site_label_2
 _geom_angle_atom_site_label_3
 _geom_angle
 _geom_angle_site_symmetry_1
 _geom_angle_site_symmetry_3
 _geom_angle_publ_flag
N3 Fe1 N6 86.10(14) . . ?
N3 Fe1 N1 80.90(12) . . ?
N6 Fe1 N1 98.43(13) . . ?
N3 Fe1 N4 97.70(12) . . ?
N6 Fe1 N4 80.75(13) . . ?
N1 Fe1 N4 178.44(13) . . ?
N3 Fe1 O5 91.03(12) . . ?
N6 Fe1 O5 172.26(13) . . ?
N1 Fe1 O5 88.19(12) . . ?
N4 Fe1 O5 92.54(12) . . ?
N3 Fe1 O1 172.54(13) . . ?
N6 Fe1 O1 91.53(14) . . ?
N1 Fe1 O1 92.48(12) . . ?
N4 Fe1 O1 88.88(12) . . ?
O5 Fe1 O1 92.18(13) . . ?
O7A Mn1 O7A 157.7(7) 2_565 . ?
O7A Mn1 O2 85.1(2) 2_565 3_655 ?
O7A Mn1 O2 79.9(4) . 3_655 ?
O7A Mn1 O2 79.9(4) 2_565 4_465 ?
O7A Mn1 O2 85.1(2) . 4_465 ?
O2 Mn1 O2 95.37(18) 3_655 4_465 ?
O7A Mn1 O6 107.4(4) 2_565 . ?
O7A Mn1 O6 87.7(2) . . ?
O2 Mn1 O6 84.90(13) 3_655 . ?
O2 Mn1 O6 172.65(11) 4_465 . ?
O7A Mn1 O6 87.7(2) 2_565 2_565 ?
O7A Mn1 O6 107.4(4) . 2_565 ?
O2 Mn1 O6 172.65(11) 3_655 2_565 ?
O2 Mn1 O6 84.90(13) 4_465 2_565 ?
O6 Mn1 O6 95.78(18) . 2_565 ?
O2 Mn1 O7B 87.98(17) 3_655 2_565 ?
O2 Mn1 O7B 105.7(2) 4_465 2_565 ?
O6 Mn1 O7B 81.7(2) . 2_565 ?
O6 Mn1 O7B 84.88(17) 2_565 2_565 ?
O2 Mn1 O7B 105.7(2) 3_655 . ?
O2 Mn1 O7B 87.98(17) 4_465 . ?
O6 Mn1 O7B 84.88(17) . . ?
O6 Mn1 O7B 81.7(2) 2_565 . ?
O7B Mn1 O7B 159.9(4) 2_565 . ?
O2 C1 O1 120.9(4) . . ?
O2 C1 C2 118.8(4) . . ?
O1 C1 C2 120.3(3) . . ?
C7 C2 C3 117.9(3) . . ?
C7 C2 C1 126.6(3) . . ?
C3 C2 C1 115.5(3) . . ?
C4 C3 C2 120.3(4) . . ?
C4 C3 H3A 119.8 . . ?
C2 C3 H3A 119.8 . . ?
C5 C4 C3 120.9(4) . . ?
C5 C4 H4A 119.6 . . ?
C3 C4 H4A 119.6 . . ?
C4 C5 C6 121.0(4) . . ?
C4 C5 H5A 119.5 . . ?
C6 C5 H5A 119.5 . . ?
C5 C6 C7 119.1(4) . . ?
C5 C6 H6A 120.5 . . ?
C7 C6 H6A 120.5 . . ?
C2 C7 C6 120.8(3) . . ?
C2 C7 N1 120.2(3) . . ?
C6 C7 N1 119.0(3) . . ?
N2 C8 N3 114.3(3) . . ?
N2 C8 C9 120.0(3) . . ?
N3 C8 C9 125.7(3) . . ?
C14 C9 C10 118.4(3) . . ?
C14 C9 C8 123.2(3) . . ?
C10 C9 C8 118.4(3) . . ?
C11 C10 C9 119.6(4) . . ?
C11 C10 H10A 120.2 . . ?
C9 C10 H10A 120.2 . . ?
C12 C11 C10 120.9(4) . . ?
C12 C11 H11A 119.6 . . ?
C10 C11 H11A 119.6 . . ?
C11 C12 C13 120.7(4) . . ?
C11 C12 H12A 119.7 . . ?
C13 C12 H12A 119.7 . . ?
C12 C13 C14 120.0(4) . . ?
C12 C13 H13A 120.0 . . ?
C14 C13 H13A 120.0 . . ?
C13 C14 C9 120.4(4) . . ?
C13 C14 H14A 119.8 . . ?
C9 C14 H14A 119.8 . . ?
O6 C15 O5 120.5(4) . . ?
O6 C15 C16 118.5(4) . . ?
O5 C15 C16 121.0(3) . . ?
C17 C16 C21 118.5(4) . . ?
C17 C16 C15 116.1(4) . . ?
C21 C16 C15 125.3(3) . . ?
C18 C17 C16 121.2(5) . . ?
C18 C17 H17A 119.4 . . ?
C16 C17 H17A 119.4 . . ?
C19 C18 C17 120.1(5) . . ?
C19 C18 H18A 119.9 . . ?
C17 C18 H18A 119.9 . . ?
C18 C19 C20 121.0(5) . . ?
C18 C19 H19A 119.5 . . ?
C20 C19 H19A 119.5 . . ?
C21 C20 C19 118.9(5) . . ?
C21 C20 H20A 120.5 . . ?
C19 C20 H20A 120.5 . . ?
C20 C21 C16 120.2(4) . . ?
C20 C21 N4 119.3(4) . . ?
C16 C21 N4 120.5(3) . . ?
N5 C22 N6 114.6(3) . . ?
N5 C22 C23 119.6(3) . . ?
N6 C22 C23 125.8(4) . . ?
C28 C23 C24 118.8(4) . . ?
C28 C23 C22 123.6(4) . . ?
C24 C23 C22 117.6(4) . . ?
C23 C24 C25 119.6(5) . . ?
C23 C24 H24A 120.2 . . ?
C25 C24 H24A 120.2 . . ?
C26 C25 C24 120.9(5) . . ?
C26 C25 H25A 119.5 . . ?
C24 C25 H25A 119.5 . . ?
C25 C26 C27 119.8(5) . . ?
C25 C26 H26A 120.1 . . ?
C27 C26 H26A 120.1 . . ?
C26 C27 C28 120.9(6) . . ?
C26 C27 H27A 119.5 . . ?
C28 C27 H27A 119.5 . . ?
C23 C28 C27 119.8(5) . . ?
C23 C28 H28A 120.1 . . ?
C27 C28 H28A 120.1 . . ?
N2 N1 C7 115.9(3) . . ?
N2 N1 Fe1 116.2(2) . . ?
C7 N1 Fe1 127.6(2) . . ?
N1 N2 C8 114.6(3) . . ?
O3 N3 C8 121.6(3) . . ?
O3 N3 Fe1 124.5(2) . . ?
C8 N3 Fe1 113.9(2) . . ?
N5 N4 C21 115.9(3) . . ?
N5 N4 Fe1 116.0(2) . . ?
C21 N4 Fe1 128.0(2) . . ?
N4 N5 C22 115.1(3) . . ?
O4 N6 C22 123.1(3) . . ?
O4 N6 Fe1 123.5(3) . . ?
C22 N6 Fe1 113.4(3) . . ?
C1 O1 Fe1 127.6(2) . . ?
C1 O2 Mn1 144.6(3) . 3_654 ?
C15 O5 Fe1 127.8(2) . . ?
C15 O6 Mn1 139.6(3) . . ?
C29A O7A Mn1 136.3(10) . . ?
C29B O7B Mn1 133.3(10) . . ?
 
_refine_diff_density_max    0.573
_refine_diff_density_min   -0.571
_refine_diff_density_rms    0.064

_shelxl_version_number 2013-2

_shelx_res_file
;
TITL 1 in P4(2)/n
CELL 0.71073  20.6512  20.6512  13.6410  90.000  90.000  90.000
ZERR   4.00   0.0029   0.0029   0.0027   0.000   0.000   0.000
LATT  1
SYMM 0.5-X, 0.5-Y, Z
SYMM -Y, 0.5+X, 0.5+Z
SYMM 0.5+Y, -X, 0.5+Z
SFAC C H N O MN FE
UNIT 232 176 48 56 4 8
acta
bond $h
htab
rtab rdis fe1 mn1
L.S. 8
BOND
FMAP 2
PLAN 20
WGHT    0.107100
FVAR       0.14143   0.47741
FE1   6    0.309919    0.549857    0.044282    11.00000    0.05047    0.06434 =
         0.06196   -0.00160    0.00475    0.00031
MN1   5    0.250000    0.750000    0.288896    10.50000    0.06868    0.04917 =
         0.06564    0.00000    0.00000   -0.00882
C1    1    0.218225    0.632084   -0.056913    11.00000    0.07648    0.07255 =
         0.06018    0.00376   -0.00072    0.00426
C2    1    0.162746    0.601786   -0.004531    11.00000    0.06116    0.06475 =
         0.06337   -0.00090   -0.00492    0.00416
C3    1    0.100899    0.627875   -0.026785    11.00000    0.07070    0.08565 =
         0.09046    0.00847   -0.01494    0.01306
AFIX  43
H3A   2    0.097427    0.662618   -0.069843    11.00000   -1.20000
AFIX   0
C4    1    0.045982    0.602006    0.015059    11.00000    0.05942    0.10998 =
         0.11423    0.00636   -0.01356    0.01236
AFIX  43
H4A   2    0.005632    0.618821   -0.001326    11.00000   -1.20000
AFIX   0
C5    1    0.049934    0.552734    0.079321    11.00000    0.05089    0.10435 =
         0.11414    0.00609   -0.00364   -0.00001
AFIX  43
H5A   2    0.012321    0.536456    0.107574    11.00000   -1.20000
AFIX   0
C6    1    0.109331    0.525843    0.104065    11.00000    0.05478    0.07647 =
         0.09303    0.00779    0.00314   -0.00336
AFIX  43
H6A   2    0.111632    0.491558    0.148133    11.00000   -1.20000
AFIX   0
C7    1    0.165812    0.551084    0.061701    11.00000    0.04666    0.06289 =
         0.06783   -0.00413   -0.00359    0.00203
C8    1    0.284641    0.463976    0.192703    11.00000    0.05025    0.05018 =
         0.06982   -0.00771   -0.00435    0.00244
C9    1    0.290104    0.419284    0.275407    11.00000    0.06714    0.04800 =
         0.06449   -0.00590   -0.00117    0.00372
C10   1    0.237620    0.377625    0.295415    11.00000    0.08219    0.06044 =
         0.07857    0.00701   -0.00888   -0.00746
AFIX  43
H10A  2    0.200838    0.378588    0.256106    11.00000   -1.20000
AFIX   0
C11   1    0.241192    0.335263    0.373978    11.00000    0.10330    0.06448 =
         0.08391    0.00614   -0.00430   -0.01418
AFIX  43
H11A  2    0.206889    0.307268    0.386431    11.00000   -1.20000
AFIX   0
C12   1    0.293961    0.334071    0.432882    11.00000    0.12186    0.06119 =
         0.07105    0.00492   -0.00731    0.01064
AFIX  43
H12A  2    0.295698    0.304953    0.484824    11.00000   -1.20000
AFIX   0
C13   1    0.344841    0.375340    0.416734    11.00000    0.09726    0.07545 =
         0.07509   -0.00703   -0.01538    0.01136
AFIX  43
H13A  2    0.380113    0.375314    0.459121    11.00000   -1.20000
AFIX   0
C14   1    0.343704    0.417212    0.337020    11.00000    0.07625    0.06778 =
         0.07047   -0.00383   -0.01026    0.00306
AFIX  43
H14A  2    0.378992    0.444002    0.324806    11.00000   -1.20000
AFIX   0
C15   1    0.343085    0.670911    0.139072    11.00000    0.08328    0.06712 =
         0.06212   -0.00341    0.00521   -0.00578
C16   1    0.408489    0.672365    0.092697    11.00000    0.06829    0.07080 =
         0.07342    0.00634   -0.00192   -0.00916
C17   1    0.448314    0.724106    0.118891    11.00000    0.10488    0.07729 =
         0.09918    0.00016   -0.00402   -0.02758
AFIX  43
H17A  2    0.432323    0.756140    0.160243    11.00000   -1.20000
AFIX   0
C18   1    0.511045    0.728626    0.084543    11.00000    0.09758    0.10153 =
         0.13682    0.00914   -0.01087   -0.03683
AFIX  43
H18A  2    0.536843    0.763515    0.102787    11.00000   -1.20000
AFIX   0
C19   1    0.535108    0.682288    0.024253    11.00000    0.07458    0.12019 =
         0.12165    0.02324    0.00212   -0.03351
AFIX  43
H19A  2    0.577719    0.685251    0.002654    11.00000   -1.20000
AFIX   0
C20   1    0.496673    0.629913   -0.006050    11.00000    0.06652    0.09983 =
         0.08689    0.01286    0.00612   -0.01155
AFIX  43
H20A  2    0.513082    0.599009   -0.048969    11.00000   -1.20000
AFIX   0
C21   1    0.433272    0.624955    0.029367    11.00000    0.05506    0.07566 =
         0.06723    0.00895    0.00091   -0.01115
C22   1    0.379943    0.486999   -0.097743    11.00000    0.05859    0.08129 =
         0.06277   -0.00037    0.00417    0.01102
C23   1    0.401958    0.443199   -0.176649    11.00000    0.08060    0.08114 =
         0.06253   -0.00393   -0.00197    0.01956
C24   1    0.467261    0.445089   -0.202191    11.00000    0.08335    0.10681 =
         0.07246    0.00491    0.01494    0.03210
AFIX  43
H24A  2    0.495145    0.473835   -0.171010    11.00000   -1.20000
AFIX   0
C25   1    0.490598    0.403591   -0.274847    11.00000    0.11859    0.11384 =
         0.08617    0.00696    0.03051    0.04555
AFIX  43
H25A  2    0.534549    0.403478   -0.289706    11.00000   -1.20000
AFIX   0
C26   1    0.450290    0.363677   -0.323768    11.00000    0.16131    0.11126 =
         0.07610   -0.01257    0.01394    0.04095
AFIX  43
H26A  2    0.466374    0.336503   -0.372376    11.00000   -1.20000
AFIX   0
C27   1    0.386377    0.363258   -0.301962    11.00000    0.14598    0.13008 =
         0.10168   -0.04348    0.00023    0.00762
AFIX  43
H27A  2    0.358529    0.336648   -0.337285    11.00000   -1.20000
AFIX   0
C28   1    0.361539    0.402413   -0.226797    11.00000    0.10133    0.13076 =
         0.09729   -0.04200    0.00088    0.00871
AFIX  43
H28A  2    0.317752    0.400667   -0.211088    11.00000   -1.20000
AFIX   0
N1    3    0.226904    0.525193    0.090265    11.00000    0.05013    0.06095 =
         0.06260    0.00192   -0.00047    0.00214
N2    3    0.225780    0.484041    0.162368    11.00000    0.05505    0.05570 =
         0.06627   -0.00053    0.00045   -0.00175
N3    3    0.335225    0.489796    0.141282    11.00000    0.04658    0.06822 =
         0.07597   -0.00924    0.00025    0.00550
N4    3    0.394201    0.572395   -0.000809    11.00000    0.06069    0.06966 =
         0.05819    0.00601    0.00585    0.00482
N5    3    0.417407    0.536973   -0.070719    11.00000    0.06134    0.07877 =
         0.06443    0.00237    0.00763    0.00934
N6    3    0.323026    0.481756   -0.046720    11.00000    0.06234    0.07536 =
         0.07272   -0.01166   -0.00429   -0.00481
O1    4    0.273678    0.604974   -0.056427    11.00000    0.06783    0.09742 =
         0.07740    0.02163    0.01422    0.01589
O2    4    0.208919    0.683489   -0.103354    11.00000    0.09615    0.08984 =
         0.09396    0.03222    0.01003    0.01661
O3    4    0.393002    0.473038    0.157789    11.00000    0.05011    0.11324 =
         0.10013    0.02314   -0.00394    0.00790
O4    4    0.284107    0.435658   -0.058089    11.00000    0.08444    0.09985 =
         0.11224   -0.03730    0.00788   -0.01811
O5    4    0.309080    0.619040    0.139340    11.00000    0.08402    0.06771 =
         0.07615   -0.01105    0.02417   -0.01261
O6    4    0.323140    0.720792    0.181119    11.00000    0.10537    0.07135 =
         0.10260   -0.02176    0.02016   -0.00637
part 1
O7A   4    0.309746    0.834624    0.319868    21.00000    0.09375    0.05815 =
         0.11539   -0.00009    0.00719   -0.02047
C29A  1    0.300542    0.896031    0.327997    21.00000    0.11452    0.06189 =
         0.05987   -0.00733   -0.00563   -0.03106
part 2
O7B   4    0.285037    0.848525    0.260799   -21.00000    0.07789    0.04917 =
         0.06930    0.01289   -0.01662   -0.01816
C29B  1    0.339973    0.876966    0.274788   -21.00000    0.14770    0.14231 =
         0.14037    0.08150   -0.05968   -0.06856
part 0

HKLF 4

REM  1 in P4(2)/n
REM R1 =  0.0579 for    3771 Fo > 4sig(Fo)  and  0.1027 for all    6637 data
REM    412 parameters refined using      0 restraints

END

WGHT      0.1075      0.0000

REM Instructions for potential hydrogen bonds

REM No hydrogen bonds found for HTAB generation

REM Highest difference peak  0.573,  deepest hole -0.571,  1-sigma level  0.064
Q1    1   0.3352  0.5109  0.0827  11.00000  0.05    0.57
Q2    1   0.2500  0.2500 -0.2500  10.25000  0.05    0.53
Q3    1   0.3078  0.4892  0.0385  11.00000  0.05    0.39
Q4    1   0.2982  0.2177  0.6123  11.00000  0.05    0.28
Q5    1   0.3843  0.5529  0.0397  11.00000  0.05    0.27
Q6    1   0.2564  0.5468 -0.0385  11.00000  0.05    0.26
Q7    1   0.2449  0.5480 -0.0057  11.00000  0.05    0.25
Q8    1   0.3384  0.9355  0.2916  11.00000  0.05    0.25
Q9    1   0.3319  0.5048  0.0047  11.00000  0.05    0.22
Q10   1   0.3853  0.4612  0.2492  11.00000  0.05    0.22
Q11   1   0.3124  0.7371  0.2801  11.00000  0.05    0.21
Q12   1   0.3594  0.5906  0.0831  11.00000  0.05    0.21
Q13   1   0.3078  0.5916 -0.0564  11.00000  0.05    0.20
Q14   1   0.2667  0.8670  0.2197  11.00000  0.05    0.20
Q15   1   0.2837  0.9047  0.3735  11.00000  0.05    0.19
Q16   1   0.3659  0.8666  0.3699  11.00000  0.05    0.19
Q17   1   0.2419  0.4224 -0.0153  11.00000  0.05    0.19
Q18   1   0.0472  0.6921  0.0388  11.00000  0.05    0.18
Q19   1   0.3349  0.5527 -0.0496  11.00000  0.05    0.18
Q20   1   0.1234  0.5706 -0.1018  11.00000  0.05    0.18
;
_shelx_res_checksum   23438

_shelx_hkl_file
;
   0   0   3   -0.10    0.34
   0   0  -3    0.20    0.33
   0   0   4   11.31    0.94
   0   0  -4   11.33    0.87
   0   0   5   -0.02    0.48
   0   0  -5    0.28    0.44
   0   0   6    5.14    0.83
   0   0  -6    3.61    1.25
   0   0   7   -0.51    1.01
   0   0  -7   -0.69    0.60
   0   0  -7   -0.22    0.61
   0   0   8  344.23   10.91
   0   0  -8  359.62   11.08
   0   0  -8  359.00   11.10
   0   0   9    0.59    0.80
   0   0  -9    0.00    0.73
   0   0  -9    0.42    0.77
   0   0  10   16.36    2.74
   0   0 -10   13.48    1.58
   0   0 -10   14.78    1.70
   0   0  11   -0.28    0.86
   0   0 -11    0.02    0.81
   0   0 -11    0.04    1.16
   0   0  12   25.39    3.43
   0   0 -12   18.10    1.93
   0   0  13    0.40    0.86
   0   0 -13   -0.19    0.75
   0   0 -13   -0.03    0.83
   0   0  14   -1.42    1.22
   0   0 -14   -0.23    1.05
   0   0  15    0.59    1.21
   0   0 -15    0.39    1.07
   0   0  16    1.78    1.54
   0   0 -16    1.83    2.19
   0   0  17    3.05    2.19
   0   0 -17   -0.34    1.18
   1   0   2  234.51    5.00
   0   1   2  232.95    4.66
  -1   0   2  238.14    4.87
  -1   0   2  231.22    4.41
   0  -1   2  239.07    5.47
   0  -1  -2  216.52    4.75
   0   1  -2  224.84    4.65
  -1   0  -2  234.73    5.51
   1   0  -2  202.14    4.18
   1   0  -2  218.48    4.47
   0   1   3   63.45    1.83
   0  -1   3   64.72    1.91
  -1   0   3   67.05    1.71
   1   0   3   64.94    2.08
   1   0  -3   63.15    1.85
  -1   0  -3   64.19    2.01
   1   0  -3   66.93    1.69
   0   1  -3   63.88    1.85
   0  -1  -3   64.82    1.81
   0   1   4   69.74    2.14
   1   0   4   66.61    2.31
  -1   0   4   64.46    2.55
   0  -1   4   68.31    2.22
   0  -1  -4   72.65    2.86
   1   0  -4   71.21    2.13
   1   0  -4   73.61    1.99
   0   1  -4   69.40    2.14
  -1   0  -4   71.91    2.34
   1   0   5   29.57    1.54
   0  -1   5   29.63    1.47
   0   1   5   30.95    2.03
  -1   0   5   28.02    1.31
   0  -1  -5   29.72    1.35
   1   0  -5   29.80    2.00
   0   1  -5   29.42    1.38
  -1   0  -5   30.04    1.50
   1   0  -5   29.85    1.25
  -1   0   6  156.68    4.37
   0  -1   6  158.84    5.67
   0   1   6  157.10    4.49
   1   0   6  156.58    5.81
   1   0  -6  152.94    4.43
   1   0  -6  159.91    4.38
  -1   0  -6  162.65    4.82
   0   1  -6  158.28    4.55
   0  -1  -6  155.92    4.48
   0   1  -6  160.45    4.27
   0   1   7    1.66    0.73
  -1   0   7    1.25    0.69
   0  -1   7    2.08    0.76
   1   0   7    1.26    0.82
   0  -1  -7    1.96    0.70
   0   1  -7    1.50    0.65
   0   1  -7    1.23    0.71
   1   0  -7    0.99    0.72
  -1   0  -7    1.57    0.78
   1   0  -7    1.13    1.00
   0  -1   8  211.22    7.06
   1   0   8  208.38    7.11
  -1   0   8  205.31    7.82
   0   1   8  211.58    6.82
  -1   0  -8  214.53    6.98
   0   1  -8  214.54    6.88
   0   1  -8  216.67    7.86
   1   0  -8  205.54    6.46
   0  -1  -8  214.12    6.74
   1   0  -8  221.12    6.99
   1   0   9    4.71    2.15
   0  -1   9    5.06    1.37
   0   1   9    5.12    1.20
  -1   0   9    4.69    1.18
   0   1  -9    4.56    1.89
   1   0  -9    5.17    1.09
   1   0  -9    4.65    1.22
   0  -1  -9    5.88    1.33
   0   1  -9    5.84    1.15
  -1   0  -9    4.90    1.24
   0  -1  -9    4.83    1.14
   0   1  10   -0.27    1.46
   0  -1  10    0.50    0.98
  -1   0  10    0.04    1.41
   1   0  10    0.11    1.01
   0   1 -10    1.04    0.86
  -1   0 -10    1.25    1.40
   0   1 -10    1.22    0.86
   1   0 -10   -0.16    1.23
  -1   0 -10   -0.01    0.91
   0  -1 -10    1.33    0.84
  -1   0  11    2.18    1.17
   1   0  11    2.00    1.34
   0  -1  11    2.85    1.30
   0   1  11    3.07    1.21
   1   0 -11   -0.03    1.18
   0  -1 -11    2.96    1.06
  -1   0 -11    2.61    1.16
   0   1 -11    1.78    1.09
   1   0 -11    3.03    1.06
  -1   0  12    1.45    0.96
   1   0  12    0.17    1.63
   0  -1  12    0.21    1.63
   0   1  12    0.23    0.95
   1   0 -12   -1.19    0.84
   0   1 -12    0.94    1.41
   0   1 -12    0.02    0.85
  -1   0 -12   -0.27    1.44
   0  -1 -12    1.68    0.86
   0  -1 -12   -0.03    1.01
   0  -1  13    1.20    1.30
  -1   0  13    2.06    1.25
   1   0  13    1.87    1.30
   0   1  13    1.91    1.91
   0   1 -13    0.62    1.12
   0  -1 -13    2.31    1.75
  -1   0 -13    1.08    1.15
   1   0 -13    2.78    1.05
   1   0  14   -0.09    1.08
   0  -1  14    0.78    1.79
  -1   0  14   -0.61    1.06
   0   1  14    1.24    1.04
  -1   0 -14    0.84    0.97
   1   0 -14    0.19    0.89
   1   0 -14   -0.03    1.03
   0   1 -14    0.15    0.93
   0  -1 -14    0.67    0.97
   0  -1 -14    0.01    1.12
   1   0  15   -0.61    1.07
   0  -1  15   -0.35    1.09
   0   1  15   -0.37    1.00
  -1   0  15   -0.33    0.97
  -1   0 -15    0.65    0.92
   1   0 -15    0.08    1.34
   0  -1 -15    0.14    1.44
   0   1 -15    0.34    1.41
   0  -1  16    0.26    2.10
   0   1  16    1.02    1.21
  -1   0  16    0.13    1.21
   1   0  16   -0.63    1.30
   1   0 -16    0.11    1.05
   0  -1 -16   -0.39    1.08
   0   1 -16   -0.68    1.12
  -1   0 -16    3.46    1.17
   0   1  17   -1.54    1.50
  -1   0  17   -0.34    2.29
   0  -1  17    0.70    1.58
   1   0  17    2.16    2.40
   0  -1 -17    3.25    2.04
  -1   0 -17    3.53    2.03
   1   0 -17   -0.29    1.98
   0   1 -17    2.09    2.07
   1  -1   2   87.73    2.60
  -1  -1   2   87.06    1.77
  -1   1   2   88.15    1.60
  -1  -1   2   90.96    1.76
   1   1   2   84.28    2.45
   1  -1  -2   87.73    2.05
   1   1  -2   84.53    1.87
   1  -1  -2   78.31    1.67
   1   1  -2   83.15    1.98
  -1  -1  -2   89.99    2.05
  -1   1  -2   88.93    2.08
  -1   1   3    0.71    0.66
   1  -1   3    1.21    0.59
   1   1   3    1.54    0.94
  -1  -1   3    1.26    0.45
  -1  -1   3    1.22    0.43
   1  -1  -3    1.67    0.63
  -1   1  -3    1.76    0.55
   1   1  -3    1.39    0.68
  -1  -1  -3    0.99    0.54
   1   1  -3    1.31    0.42
   1  -1  -3    0.81    0.59
  -1  -1   4   12.90    0.89
  -1   1   4   10.63    0.82
   1   1   4   12.36    1.03
   1  -1   4   11.95    1.07
   1  -1  -4   11.73    1.05
  -1  -1  -4   12.60    1.00
   1   1  -4   12.24    0.81
  -1   1  -4   11.82    1.02
   1  -1  -4   11.59    1.19
   1   1  -4   12.46    0.83
   1   1   5   45.40    1.87
  -1   1   5   44.21    1.54
   1  -1   5   44.94    2.72
  -1  -1   5   47.25    1.72
  -1  -1  -5   44.13    1.81
   1  -1  -5   44.96    1.86
   1   1  -5   46.40    2.19
  -1   1  -5   44.30    1.85
   1  -1  -5   46.47    1.57
   1   1  -5   45.90    1.62
   1   1   6   -0.01    0.54
  -1   1   6    0.70    0.71
   1  -1   6   -0.15    0.58
  -1  -1   6    0.14    0.49
   1   1  -6    0.48    0.45
   1  -1  -6   -0.08    0.43
   1  -1  -6   -0.23    0.53
   1   1  -6    0.13    0.73
  -1   1  -6    1.04    0.54
  -1  -1  -6   -0.26    0.87
  -1  -1   7    4.25    0.87
  -1   1   7    4.76    1.29
   1  -1   7    4.09    1.63
   1   1   7    3.42    0.93
  -1  -1  -7    4.56    0.92
   1   1  -7    4.42    1.29
   1  -1  -7    4.56    0.78
   1   1  -7    3.56    0.82
  -1   1  -7    1.17    1.50
   1  -1  -7    3.62    0.96
   1   1   8    1.63    0.89
  -1   1   8    0.50    0.76
  -1  -1   8    0.81    0.78
   1  -1   8    1.31    0.91
   1  -1  -8    1.82    0.86
   1   1  -8    0.71    0.72
   1  -1  -8    0.97    0.72
  -1   1  -8    0.80    0.83
   1   1  -8    1.54    0.75
  -1  -1  -8   -0.46    0.87
   1   1   9   21.98    2.94
   1  -1   9   17.81    3.10
  -1   1   9   18.59    1.62
  -1  -1   9   17.16    1.77
  -1   1  -9   18.64    1.63
   1  -1  -9   19.63    1.60
  -1  -1  -9   17.62    1.76
  -1   1  -9   17.90    1.78
   1   1  -9   18.28    1.63
   1   1  -9   17.54    1.60
   1  -1  -9   17.17    1.88
  -1   1  10    0.52    1.26
  -1  -1  10   -0.65    1.36
   1   1  10   -0.57    0.89
   1  -1  10    1.43    0.90
   1  -1 -10    0.22    0.69
  -1  -1 -10   -0.53    0.79
  -1   1 -10    0.22    0.76
  -1   1 -10   -0.85    0.81
   1  -1 -10   -0.59    0.87
   1   1 -10   -1.00    0.75
   1   1 -10   -0.65    1.19
  -1   1  11    7.10    1.43
  -1  -1  11    8.05    1.54
   1   1  11    7.84    1.62
   1  -1  11    7.93    1.72
  -1   1 -11    7.75    1.46
  -1  -1 -11   -0.01    1.58
   1  -1 -11    8.31    1.32
   1   1 -11    7.09    1.32
  -1  -1  12    8.64    2.74
   1  -1  12   11.18    1.93
   1   1  12   11.63    1.82
  -1   1  12   10.13    1.67
   1   1 -12   10.74    1.52
  -1  -1 -12    8.04    1.63
  -1   1 -12   13.46    1.68
  -1   1 -12    8.97    1.63
   1  -1 -12    9.58    1.49
   1   1  13    2.83    2.02
   1  -1  13    1.38    1.40
  -1  -1  13    3.01    1.29
  -1   1  13    3.33    1.86
   1   1 -13    0.05    1.15
  -1   1 -13    2.29    1.86
  -1  -1 -13    2.60    1.17
   1   1 -13    2.04    1.09
   1  -1 -13    2.32    1.09
  -1  -1 -13   -0.03    1.30
  -1  -1  14    0.63    1.60
   1   1  14   -1.18    1.00
  -1   1  14   -0.17    0.91
   1  -1  14    0.13    1.64
  -1  -1 -14    0.78    0.89
   1  -1 -14    1.43    1.28
   1   1 -14    0.15    0.83
  -1   1 -14   -0.15    0.88
   1  -1  15   -0.06    1.23
   1   1  15   -0.63    1.14
  -1   1  15   -0.80    1.06
  -1  -1  15    0.62    1.13
   1  -1 -15   -0.58    0.94
   1   1 -15   -0.79    0.95
  -1  -1 -15   -0.09    1.06
  -1   1 -15    0.39    1.00
   1   1 -15   -0.04    0.95
   1   1  16    1.66    0.98
  -1  -1  16   -0.31    1.53
  -1   1  16    0.07    0.88
   1  -1  16    0.48    1.61
  -1  -1 -16    0.29    0.87
  -1   1 -16   -1.59    1.39
   1  -1 -16    0.12    1.30
   1   1 -16   -2.56    1.30
   1  -1  17    1.05    1.25
  -1  -1  17    0.49    1.20
  -1   1  17    0.84    1.15
   1   1  17    2.20    1.24
  -1  -1 -17   -1.46    1.03
   1   1 -17    0.13    0.99
   1   1 -17    0.47    1.02
   1  -1 -17   -1.25    0.98
  -1   1 -17   -0.23    1.06
  -2   1   2   48.57    1.44
  -2   1   2   50.87    0.98
   2  -1   2   49.80    1.54
  -1  -2   2   49.06    1.28
  -1  -2   2   51.26    0.97
   1   2   2   49.25    1.40
   1   2  -2   49.61    1.23
  -1  -2  -2   50.41    1.41
   2  -1  -2   50.56    1.44
   1   2  -2   48.39    0.87
  -2   1  -2   49.10    1.52
   1   2   3   37.23    1.58
  -1  -2   3   39.99    2.01
  -1  -2   3   37.89    1.12
  -2   1   3   39.96    1.63
   2  -1   3   41.30    1.76
  -2   1   3   38.11    1.00
  -1  -2  -3   37.78    1.56
   2  -1  -3   39.04    1.29
  -2   1  -3   37.37    1.63
   1   2  -3   38.67    1.39
   1   2  -3   38.56    1.34
   2  -1  -3   39.12    1.60
   1   2   4   40.14    1.65
  -1  -2   4   39.93    1.53
  -2   1   4   39.15    1.19
   2  -1   4   37.85    1.77
   2  -1  -4   41.51    1.69
  -1  -2  -4   41.32    1.66
   1   2  -4   39.45    1.18
   2  -1  -4   41.53    1.19
   1   2  -4   39.40    1.44
  -2   1  -4   40.65    1.77
  -1  -2   5    0.07    0.52
   1   2   5    0.39    0.54
  -2   1   5    0.14    0.38
   2  -1   5    0.58    0.61
   1   2  -5    0.73    0.46
  -2   1  -5    0.03    0.57
   2  -1  -5    0.64    0.85
   2  -1  -5    0.38    0.36
  -1  -2  -5    0.74    0.53
   1   2  -5    0.17    0.58
   2  -1   6   23.47    2.30
   1   2   6   23.93    2.10
  -2   1   6   19.96    1.05
  -1  -2   6   20.38    1.32
  -1  -2  -6   22.41    1.37
   1   2  -6   20.61    1.27
   2  -1  -6   21.44    2.13
   1   2  -6   22.04    1.06
  -2   1  -6   24.19    2.17
   2  -1  -6   19.79    1.04
   2  -1   7    3.38    1.04
   1   2   7    2.84    0.92
  -2   1   7    3.16    1.15
  -1  -2   7    4.34    1.40
  -2   1  -7    4.37    1.00
   2  -1  -7    4.06    1.46
   1   2  -7    3.00    0.69
   1   2  -7    3.53    0.82
  -1  -2  -7    3.25    0.92
   2  -1  -7    3.58    0.69
   2  -1   8    4.13    1.21
  -2   1   8    4.55    0.85
  -1  -2   8    4.85    1.05
   1   2   8    3.71    1.09
  -1  -2  -8    4.22    1.04
   2  -1  -8    3.69    1.08
  -2   1  -8    5.11    1.13
   1   2  -8    3.08    1.33
   1   2  -8    4.30    0.94
   2  -1  -8    5.08    1.27
   2  -1   9   12.64    1.81
  -2   1   9    9.69    1.31
  -1  -2   9    8.67    1.52
   1   2   9    9.90    2.41
  -2   1  -9   10.74    2.56
   2  -1  -9   10.52    1.21
   1   2  -9   10.63    1.95
   2  -1  -9   11.36    1.56
   1   2  -9   11.06    1.37
  -1  -2  -9   12.08    1.41
   1   2  10   21.19    2.20
  -2   1  10   18.51    2.87
  -1  -2  10   21.23    3.28
   2  -1  10   21.43    2.37
  -2   1 -10   22.10    2.14
   1   2 -10   20.90    1.87
   1   2 -10   21.81    1.77
  -1  -2 -10   24.43    2.04
   2  -1 -10   21.64    2.16
   2  -1 -10   20.28    2.53
  -1  -2  11   10.94    1.78
  -2   1  11   10.28    1.52
   2  -1  11    8.30    3.20
   1   2  11   11.58    1.76
   2  -1 -11   10.29    1.36
   1   2 -11   11.43    1.42
  -2   1 -11    7.20    1.79
  -2   1 -11   10.76    1.61
   1   2 -11   10.60    2.44
   1   2  12    0.93    0.87
   2  -1  12    0.79    1.01
  -1  -2  12    0.42    0.90
  -2   1  12   -0.61    0.77
   1   2 -12    0.29    0.74
   2  -1 -12   -0.11    0.70
  -2   1 -12    0.54    0.84
  -1  -2 -12   -0.95    0.81
   2  -1  13    1.15    1.16
  -2   1  13    0.12    1.41
  -1  -2  13    0.96    1.06
   1   2  13    1.02    1.62
  -2   1 -13    0.03    0.94
   2  -1 -13    0.03    1.02
  -1  -2 -13    0.28    1.44
  -2   1 -13    0.07    0.96
   1   2 -13   -0.05    0.87
   2  -1 -13    0.74    1.29
   1   2  14    3.86    1.56
   2  -1  14    5.02    1.68
  -1  -2  14    3.99    1.59
  -2   1  14    2.51    1.33
  -1  -2 -14    3.24    1.40
   2  -1 -14    3.47    1.22
   1   2 -14    0.01    1.24
  -2   1 -14    3.64    2.24
   1   2 -14    3.01    1.29
  -2   1  15   -0.23    1.34
   2  -1  15    1.80    1.03
   1   2  15   -0.08    0.96
  -1  -2  15    0.30    1.01
  -2   1 -15   -1.16    0.88
   2  -1 -15    0.17    1.20
  -2   1 -15   -0.01    0.83
   1   2 -15   -0.28    1.28
  -1  -2 -15   -0.28    0.88
   1   2  16   -0.95    1.19
  -1  -2  16   -0.58    1.22
   2  -1  16    0.28    2.07
  -2   1  16    0.04    1.04
   1   2 -16   -0.01    0.94
   2  -1 -16    0.35    0.95
   1   2 -16    0.77    1.01
  -1  -2 -16    2.64    1.06
  -2   1 -16   -1.11    1.12
  -1  -2  17   -0.10    1.39
   1   2  17   -0.54    1.35
   2  -1  17   -0.37    1.44
  -2   1  17   -0.42    1.13
   1   2 -17   -0.03    1.06
   1   2 -17    1.22    1.14
  -2   1 -17    1.45    1.21
   2  -1 -17    0.84    1.61
  -1  -2 -17    0.24    1.16
   3  -1   0  108.75    2.10
   3  -1   0  108.05    2.25
  -1  -3   0  106.27    2.45
   1   3   0  106.40    2.12
  -3   1   0  106.82    2.06
  -3   1   0  109.11    2.34
  -3   1   1   89.31    1.34
   1   3   1   88.31    2.35
   3  -1   1   89.26    2.06
  -3   1   1   90.17    2.02
  -3   1  -1   88.55    2.58
   3  -1  -1   85.85    1.94
  -1  -3  -1   87.89    1.91
   1   3   2 2643.65   88.67
   3  -1   2 2696.99   90.84
  -1  -3   2 2567.01   79.35
  -3   1   2 2638.14   87.61
  -1  -3   2 2614.23   87.37
  -3   1   2 2502.81   73.83
  -1  -3  -2 2658.88   89.20
  -3   1  -2 2643.99   88.81
   1   3  -2 2605.79   86.56
   3  -1  -2 2566.17   86.96
  -3   1   3  163.56    4.44
  -3   1   3  169.58    3.42
  -1  -3   3  159.13    4.05
   3  -1   3  168.48    4.75
   1   3   3  162.63    4.26
  -1  -3   3  166.91    3.69
   1   3  -3  162.45    4.72
   1   3  -3  163.99    3.02
  -1  -3  -3  166.42    4.33
  -3   1  -3  165.98    4.59
   3  -1  -3  165.56    4.34
  -1  -3   4    0.05    0.50
  -1  -3   4    0.51    0.30
  -3   1   4    0.10    0.93
  -3   1   4   -0.04    0.43
   1   3   4    0.72    0.53
   3  -1   4    0.03    0.62
   1   3  -4    0.19    0.41
   3  -1  -4    0.66    0.88
   1   3  -4    0.37    0.45
  -3   1  -4    0.06    0.59
   3  -1  -4    0.40    0.25
  -1  -3  -4    0.75    0.53
  -1  -3   5    4.67    0.81
  -3   1   5    4.81    0.76
   3  -1   5    5.26    0.97
   1   3   5    4.85    0.82
   3  -1  -5    5.04    0.46
   3  -1  -5    4.34    0.83
   1   3  -5    4.09    0.46
  -1  -3  -5    4.52    0.83
  -3   1  -5    3.98    0.92
   1   3  -5    4.37    1.15
   3  -1   6    1.64    0.81
  -1  -3   6    0.44    1.09
   1   3   6    1.19    0.65
  -3   1   6    1.07    0.45
  -1  -3  -6    1.13    0.68
   1   3  -6    0.97    0.66
   3  -1  -6    1.19    0.70
  -3   1  -6   -0.01    0.76
   3  -1  -6    0.59    0.41
   1   3  -6    1.52    0.60
  -3   1   7   30.64    1.38
   3  -1   7   31.40    2.10
   1   3   7   30.85    1.76
  -1  -3   7   33.57    2.70
   1   3  -7   30.84    1.30
  -1  -3  -7   31.46    1.79
   3  -1  -7   31.65    1.32
  -3   1  -7   30.30    2.95
   1   3  -7   30.94    1.68
   3  -1  -7   31.68    1.84
   1   3   8   -0.60    1.15
  -3   1   8    0.60    0.86
  -1  -3   8    0.88    0.74
   3  -1   8   -0.31    0.91
   3  -1  -8    0.41    0.76
   1   3  -8    0.62    0.68
  -1  -3  -8    0.90    0.74
   1   3  -8    0.73    0.52
  -3   1  -8   -0.55    0.80
   3  -1  -8    0.65    0.81
   3  -1   9    2.19    1.24
  -3   1   9    2.17    0.84
  -1  -3   9    3.14    1.11
   1   3   9    1.01    1.65
   3  -1  -9    1.27    1.07
   1   3  -9    2.05    0.94
   3  -1  -9    2.22    0.76
   1   3  -9    2.90    0.77
  -3   1  -9    2.72    1.18
   3  -1  10  149.89    6.71
  -3   1  10  159.27    6.72
   1   3  10  146.23    7.50
  -1  -3  10  152.20    6.15
   3  -1 -10  153.53    6.08
  -3   1 -10  144.00    8.01
   1   3 -10  158.24    6.54
  -1  -3 -10  146.31    5.72
   1   3 -10  157.19    5.88
   3  -1 -10  160.69    5.36
   1   3  11   -0.26    0.80
  -3   1  11   -0.26    0.66
   3  -1  11    0.09    1.00
  -1  -3  11    0.88    0.87
   3  -1 -11    0.01    0.81
   3  -1 -11   -1.00    0.92
  -1  -3 -11   -0.16    0.75
   1   3 -11    0.32    0.61
   1   3 -11   -0.68    0.72
  -3   1 -11    0.66    0.86
  -1  -3  12    8.39    1.73
   1   3  12    7.39    1.60
   3  -1  12    7.66    1.90
  -3   1  12    7.71    1.35
   1   3 -12    7.16    1.43
   3  -1 -12    7.57    1.23
  -1  -3 -12   -0.03    1.87
   1   3  13    0.60    1.01
   3  -1  13    0.67    2.00
  -3   1  13    1.06    1.39
  -1  -3  13    2.12    1.78
   3  -1 -13    0.99    0.82
  -1  -3 -13   -0.27    1.00
   1   3 -13    0.12    1.50
   3  -1 -13   -0.07    1.07
  -3   1 -13    0.35    1.07
  -1  -3  14    6.58    1.83
   1   3  14    5.59    2.66
  -3   1  14    4.48    1.39
   3  -1  14    6.26    1.94
  -1  -3 -14    5.77    2.44
   1   3 -14    3.75    1.43
   3  -1 -14    0.03    1.59
   3  -1 -14    4.08    1.92
  -3   1 -14    5.88    1.60
   1   3 -14    6.54    1.96
   1   3  15    1.98    1.35
  -1  -3  15    2.75    1.49
   3  -1  15    1.66    1.58
  -3   1  15    0.73    1.84
  -1  -3 -15    1.41    1.27
   1   3 -15    0.69    1.21
   1   3 -15   -0.15    1.05
  -3   1 -15    0.01    2.04
   3  -1 -15    1.65    1.03
  -1  -3  16   -1.14    1.30
  -3   1  16   -0.21    0.97
   3  -1  16    1.80    1.34
   1   3  16   -0.07    1.14
   1   3 -16   -0.11    1.42
   1   3 -16    0.34    1.00
  -1  -3 -16    1.10    1.02
  -3   1 -16    0.69    1.08
   3  -1 -16   -0.75    1.08
   3  -1 -16   -0.04    1.35
   3  -1  17    0.94    1.40
  -1  -3  17    1.09    1.38
   1   3  17   -0.59    1.26
  -3   1  17   -0.30    1.71
  -3   1 -17    0.74    1.12
   3  -1 -17    0.09    0.89
  -1  -3 -17    1.07    1.20
   1   3 -17    0.12    0.91
   1   3 -17   -1.39    1.09
  -4   1   0   -0.02    0.49
  -4   1   0    0.36    0.25
  -1  -4   0    0.08    0.30
   1   4   0    0.14    0.32
   4  -1   0   -0.02    0.40
  -4   1   1  500.97   10.06
   4  -1   1  478.02   11.62
   1   4   1  500.75   11.65
  -4   1   1  476.02   12.19
   4  -1  -1  488.63   11.59
   4  -1  -1  515.38   10.27
  -1  -4  -1  483.76   11.31
  -4   1  -1  495.08   11.90
  -4   1   2  152.28    4.01
   1   4   2  144.43    3.67
   4  -1   2  148.50    4.16
  -1  -4   2  154.07    4.78
   4  -1  -2  152.41    3.92
  -4   1  -2  151.73    4.13
  -1  -4  -2  147.77    3.81
  -1  -4   3  513.29   13.38
  -4   1   3  541.12   14.24
   4  -1   3  526.15   14.62
  -1  -4   3  545.69   11.95
   1   4   3  530.02   13.58
  -4   1   3  558.06   11.39
  -1  -4  -3  527.58   14.81
  -4   1  -3  534.19   15.94
   1   4  -3  508.48   12.90
   4  -1  -3  511.66   13.50
  -4   1   4  167.47    3.27
   4  -1   4  171.29    5.21
   1   4   4  175.98    4.63
  -1  -4   4  173.03    4.72
  -4   1   4  168.81    4.75
  -1  -4   4  173.41    3.89
   1   4  -4  170.23    3.21
   4  -1  -4  163.93    4.57
  -4   1  -4  173.56    5.13
  -1  -4  -4  178.38    5.74
   4  -1  -4  176.06    3.29
   1   4  -4  174.78    5.32
   1   4   5    5.75    0.86
  -4   1   5    5.81    0.68
   4  -1   5    5.55    1.09
  -4   1   5    6.19    1.47
  -1  -4   5    6.97    0.93
   1   4  -5    5.13    0.40
   4  -1  -5    5.23    0.90
   1   4  -5    6.01    0.82
  -1  -4  -5    6.16    0.90
  -4   1  -5    6.03    1.03
   4  -1  -5    5.65    0.41
  -1  -4   6   47.43    3.02
  -4   1   6   47.40    1.42
   4  -1   6   47.35    2.50
   1   4   6   47.12    2.07
   4  -1  -6   46.95    2.12
   1   4  -6   49.71    2.04
  -1  -4  -6   51.85    3.09
  -4   1  -6   49.81    2.44
   1   4  -6   45.53    1.29
   4  -1  -6   46.75    1.77
   1   4   7   48.03    2.24
  -4   1   7   50.19    1.64
  -1  -4   7   50.61    3.38
   4  -1   7   48.43    2.69
   4  -1  -7   48.85    2.10
  -4   1  -7   46.60    2.58
   1   4  -7   50.39    2.16
  -1  -4  -7   50.06    2.29
   4  -1  -7   43.56    2.22
   1   4  -7   49.24    1.99
  -4   1   8    0.26    0.79
  -1  -4   8    1.38    0.81
   1   4   8    0.66    0.75
   4  -1   8    0.96    0.94
   1   4  -8    0.10    0.70
   1   4  -8    0.26    0.45
   4  -1  -8    1.01    0.72
  -1  -4  -8    0.44    0.75
   4  -1  -8    0.78    0.76
  -4   1   9   -0.25    0.55
   1   4   9    2.31    1.23
  -1  -4   9    1.07    0.84
   4  -1   9   -0.32    1.00
   1   4  -9    0.44    0.50
   1   4  -9    0.31    0.74
   4  -1  -9   -0.13    0.81
  -4   1  -9   -0.24    0.91
   4  -1  -9    0.23    0.50
  -4   1  10   22.71    2.43
  -1  -4  10   22.07    2.26
   1   4  10   29.05    3.42
   1   4 -10   20.15    1.93
  -1  -4 -10   26.42    2.10
   1   4 -10   20.27    1.46
  -4   1 -10   19.43    2.24
   4  -1 -10   18.60    2.09
   4  -1 -10   20.00    1.45
   4  -1  11    0.60    1.10
  -4   1  11   -0.35    0.65
  -1  -4  11   -1.37    0.94
   1   4  11    0.35    0.90
   1   4 -11   -0.38    0.78
   1   4 -11    1.00    0.94
  -1  -4 -11    0.60    0.79
  -4   1 -11   -0.13    0.92
   4  -1 -11    0.12    0.88
   4  -1 -11    0.54    0.57
   1   4  12    0.12    0.88
  -1  -4  12   -1.65    1.01
   4  -1  12   -0.01    1.15
  -4   1  12   -0.20    0.71
   4  -1 -12   -0.02    0.90
  -4   1 -12    0.47    0.98
   4  -1 -12   -0.17    1.00
   1   4 -12    0.46    0.82
   1   4 -12   -0.46    0.65
   4  -1  13    3.70    2.73
   1   4  13    3.99    1.34
  -4   1  13    2.15    1.06
  -1  -4  13    2.28    1.54
   4  -1 -13    3.26    0.99
  -1  -4 -13    3.40    2.11
   4  -1 -13   -0.04    1.39
   1   4 -13    2.35    1.25
   1   4 -13    3.36    1.00
  -1  -4  14    2.43    2.93
   4  -1  14    6.28    1.99
  -4   1  14    5.11    1.29
   1   4  14    5.32    1.61
   4  -1 -14    2.92    1.17
   1   4 -14    5.72    1.42
  -4   1 -14    5.03    1.56
   4  -1 -14    6.24    2.45
  -1  -4 -14    6.10    1.52
   1   4 -14    0.04    1.17
  -4   1  15   -0.23    1.65
  -1  -4  15    1.73    1.55
   4  -1  15    1.59    1.67
   1   4  15   -0.23    2.14
   1   4 -15    2.06    1.93
  -4   1 -15    0.81    1.33
   4  -1 -15    1.58    1.38
   4  -1 -15    1.53    0.95
   1   4 -15    0.10    1.48
  -1  -4 -15    1.08    1.21
   1   4  16   -0.84    1.35
  -4   1  16    0.99    1.11
   4  -1  16    0.95    1.61
  -1  -4  16   -0.33    1.53
   1   4 -16   -0.01    0.95
   4  -1 -16    0.55    0.92
  -1  -4 -16    1.58    1.24
   1   4 -16    0.77    1.18
  -4   1 -16    2.44    1.19
   4  -1 -16    0.15    1.23
  -4   1  17    0.16    1.69
  -1  -4  17    0.75    1.54
   1   4  17   -1.15    1.28
   4  -1  17   -0.40    1.57
  -4   1 -17    0.60    1.14
   4  -1 -17   -0.59    1.41
   1   4 -17    0.03    1.43
   1   4 -17    1.97    1.10
  -1  -4 -17    0.86    1.34
   4  -1 -17   -1.12    1.87
  -5   1   0   28.05    1.13
  -1  -5   0   28.58    1.19
  -5   1   0   28.49    1.01
   5  -1   0   28.24    1.49
  -5   1   1  241.18    5.79
  -5   1   1  244.21    4.74
   5  -1   1  229.06    5.74
   1   5   1  235.85    5.58
   5  -1  -1  249.89    5.17
  -1  -5  -1  231.90    5.51
   5  -1  -1  241.10    5.74
  -5   1  -1  233.60    5.78
   1   5   2   48.73    1.72
  -5   1   2   51.79    1.92
  -1  -5   2   52.10    1.81
   5  -1   2   50.45    2.04
  -5   1   2   51.89    0.88
   5  -1  -2   52.13    0.82
  -5   1  -2   48.83    1.97
   5  -1  -2   52.90    2.64
  -1  -5  -2   51.84    1.86
  -5   1   3  220.92    6.01
  -5   1   3  230.89    3.83
  -1  -5   3  233.56    4.44
  -5   1   3  228.57    3.58
   5  -1   3  218.71    6.37
  -1  -5   3  217.98    5.78
   1   5   3  220.85    5.58
   1   5  -3  210.85    5.36
  -1  -5  -3  222.02    5.68
   5  -1  -3  220.04    5.84
  -5   1  -3  220.26    6.29
   5  -1   4    9.29    1.88
  -5   1   4    7.83    0.43
  -5   1   4    8.64    1.05
  -1  -5   4    7.26    0.54
  -1  -5   4    7.85    0.98
   1   5   4    8.84    1.44
   5  -1  -4    7.23    0.95
  -5   1  -4    8.63    1.76
  -1  -5  -4    8.39    0.92
   1   5  -4    7.64    1.35
  -5   1   5   57.59    3.45
   1   5   5   66.18    3.20
   5  -1   5   65.18    2.83
  -1  -5   5   61.86    2.44
  -5   1   5   60.30    1.33
  -1  -5  -5   63.87    2.38
   5  -1  -5   62.66    3.35
   1   5  -5   60.23    1.21
   1   5  -5   63.43    2.31
   5  -1  -5   61.24    1.52
  -5   1  -5   62.43    2.74
  -5   1   6   40.27    1.55
  -1  -5   6   41.84    3.01
   5  -1   6   41.91    2.42
  -5   1   6   41.87    3.15
   1   5   6   40.30    1.87
   1   5  -6   39.90    1.02
   1   5  -6   42.69    2.00
  -1  -5  -6   44.54    2.91
   5  -1  -6   40.75    1.39
  -5   1  -6   39.34    2.33
   5  -1  -6   39.69    1.98
  -1  -5   7   10.83    1.34
  -5   1   7   10.65    0.70
   5  -1   7   11.47    1.56
   1   5   7   11.04    1.21
   1   5  -7    9.06    0.59
  -1  -5  -7   11.71    1.25
   5  -1  -7   10.47    0.64
   5  -1  -7    9.34    1.22
   1   5  -7   10.36    1.16
  -5   1  -7    9.48    1.46
  -1  -5   8    9.62    2.18
   5  -1   8    9.55    1.66
  -5   1   8    9.96    1.18
   1   5   8    8.16    1.20
  -5   1  -8    8.35    1.50
   5  -1  -8    7.47    0.70
  -1  -5  -8    8.62    1.29
   1   5  -8    8.94    1.96
   1   5  -8    7.92    1.00
   5  -1  -8    8.69    1.99
   1   5   9   61.18    4.13
  -5   1   9   62.14    2.26
  -1  -5   9   62.62    4.65
   1   5  -9   58.54    2.88
   1   5  -9   60.99    2.60
  -1  -5  -9   61.41    2.97
   5  -1  -9   57.82    4.21
   5  -1  -9   57.27    2.04
  -5   1  10   48.71    3.00
  -1  -5  10   50.94    3.10
   1   5  10   45.42    4.01
   5  -1  10   51.19    3.68
  -1  -5 -10   47.00    4.04
   5  -1 -10   45.37    1.99
   1   5 -10   48.89    2.67
  -5   1 -10   48.41    3.26
   1   5 -10   48.58    2.78
   5  -1 -10   46.62    4.18
  -5   1  11   32.50    1.91
   5  -1  11   32.40    3.18
  -1  -5  11   32.26    2.85
   1   5  11   27.66    3.67
   1   5 -11   30.04    2.37
   5  -1 -11   28.28    1.69
   1   5 -11   30.26    2.40
  -1  -5 -11   30.15    3.58
   5  -1 -11   33.92    3.80
   1   5  12    1.56    1.92
  -1  -5  12    2.53    1.48
  -5   1  12    1.98    1.49
   1   5 -12    3.30    1.88
   5  -1 -12    1.35    1.30
  -1  -5 -12    2.44    1.24
   1   5 -12    3.14    1.24
  -5   1 -12    0.49    1.44
   5  -1 -12    2.83    1.30
  -1  -5  13   17.40    2.45
   1   5  13   15.98    2.05
  -5   1  13   15.06    1.59
   1   5 -13   15.73    2.96
   5  -1 -13   14.61    1.48
   1   5 -13   16.41    1.44
  -1  -5 -13   12.53    2.09
   5  -1 -13   15.64    2.16
  -1  -5  14    1.56    1.54
  -5   1  14   -0.73    0.96
   1   5  14    3.76    1.31
   5  -1  14    2.75    1.63
   5  -1 -14    1.89    0.90
  -5   1 -14    2.00    2.15
   1   5 -14    3.74    1.19
   5  -1 -14    1.77    1.32
   1   5 -14    0.07    0.86
   1   5  15    0.60    1.30
   5  -1  15    3.74    2.73
  -5   1  15    0.13    1.03
  -1  -5  15    3.28    2.51
   5  -1 -15    1.76    2.24
   1   5 -15    1.84    1.26
  -1  -5 -15    0.92    1.31
   5  -1 -15    1.23    1.40
   1   5 -15   -0.01    1.39
  -1  -5  16    0.84    1.41
  -5   1  16   -0.51    0.93
   5  -1  16    0.54    1.51
   1   5  16    0.05    1.18
   1   5 -16   -0.48    1.07
   5  -1 -16    0.76    0.78
   5  -1 -16    0.43    1.10
  -1  -5 -16   -0.50    1.14
  -5   1 -16    1.95    1.84
   1   5 -16    0.10    0.74
   1   5  17   -1.99    1.67
   5  -1  17   -1.65    1.34
  -5   1  17    0.05    0.80
  -1  -5  17    1.36    1.27
   1   5 -17    2.43    1.47
   5  -1 -17    1.78    1.04
  -1  -5 -17    1.83    1.88
   5  -1 -17   -0.72    0.71
   1   5 -17   -0.02    0.67
  -5   1 -17   -1.38    1.03
  -6   1   0    0.22    0.46
  -1  -6   0   -0.04    0.36
  -6   1   0   -0.01    0.34
   6  -1   0   -0.18    0.47
  -6   1   1    1.08    0.50
  -6   1   1    0.20    0.26
   6  -1   1    0.94    0.49
   1   6   1    0.26    0.46
   6  -1  -1    0.27    0.50
   6  -1  -1    0.88    0.27
  -6   1  -1    0.76    0.47
  -1  -6  -1   -0.24    0.79
  -6   1   2  249.82    4.74
  -6   1   2  250.83    6.42
  -1  -6   2  243.93    6.28
   1   6   2  248.85    6.07
   6  -1   2  240.05    7.62
  -6   1  -2  238.47    7.45
   6  -1  -2  248.10    7.30
  -1  -6  -2  243.08    6.00
   6  -1  -2  253.43    4.54
  -1  -6   3    1.71    1.20
  -6   1   3    1.88    0.12
  -6   1   3    2.19    0.13
  -6   1   3    2.57    0.77
   1   6   3    2.50    0.65
   6  -1   3    1.76    0.82
  -1  -6   3    1.85    0.28
  -6   1  -3    2.41    0.83
  -1  -6  -3    2.81    0.68
   6  -1  -3    4.16    0.74
   1   6  -3    0.48    0.76
   1   6   4   70.39    2.37
  -1  -6   4   69.51    2.57
   6  -1   4   70.22    2.99
  -6   1   4   69.70    1.25
  -6   1   4   68.09    1.10
  -1  -6   4   71.08    1.50
  -6   1   4   66.66    2.58
  -1  -6  -4   67.54    2.43
   1   6  -4   68.08    2.40
   6  -1  -4   72.88    2.63
  -6   1  -4   66.32    2.84
  -6   1   5  112.25    2.37
  -1  -6   5  112.12    3.82
  -6   1   5  107.45    4.90
   1   6   5  104.00    3.28
   6  -1   5  111.63    4.27
   6  -1  -5  109.30    4.75
  -1  -6  -5  111.82    3.66
  -6   1  -5  106.19    4.04
   1   6  -5  112.35    4.48
   1   6   6   34.68    1.75
  -6   1   6   33.63    1.22
  -1  -6   6   35.72    2.05
  -6   1   6   33.51    2.04
   6  -1   6   35.08    2.36
  -1  -6  -6   34.06    2.77
   1   6  -6   33.35    1.84
  -6   1  -6   35.27    2.25
   6  -1  -6   32.36    1.87
   1   6  -6   31.88    0.99
   6  -1  -6   34.05    0.84
   1   6   7   27.28    1.71
  -1  -6   7   25.80    2.00
  -6   1   7   27.21    2.03
  -6   1   7   27.01    0.98
   1   6  -7   26.76    0.79
   6  -1  -7   26.75    0.87
  -1  -6  -7   31.37    1.92
   6  -1  -7   26.58    1.76
   1   6  -7   27.52    2.54
  -1  -6   8    3.40    1.13
   1   6   8    2.23    0.95
  -6   1   8    2.97    0.81
  -6   1  -8    1.06    1.22
   6  -1  -8    2.94    1.63
  -1  -6  -8    1.73    0.97
   1   6  -8    2.67    0.96
   6  -1  -8    2.59    0.71
   1   6  -8    2.59    0.65
  -6   1   9    9.13    0.83
   1   6   9    9.37    1.36
  -1  -6   9    8.58    1.60
   6  -1  -9    7.97    1.52
   1   6  -9    8.23    0.69
   1   6  -9    8.02    1.36
  -1  -6  -9    7.70    1.39
   6  -1  -9    7.79    0.73
   1   6  10   -0.51    1.89
  -6   1  10    1.37    1.10
  -1  -6  10    2.25    2.13
   6  -1  10    4.09    1.53
   1   6 -10    3.24    1.11
  -1  -6 -10    1.99    1.06
   1   6 -10    2.07    0.88
   6  -1 -10    1.85    0.60
   6  -1 -10    0.60    1.20
  -1  -6  11   14.42    2.27
   1   6  11   12.76    3.08
  -6   1  11   14.91    1.30
  -1  -6 -11   18.56    2.09
   1   6 -11   14.58    1.95
   1   6 -11   12.73    1.68
   6  -1 -11   13.79    2.05
   6  -1 -11   13.77    1.13
  -1  -6  12    6.20    1.75
  -6   1  12    5.21    1.53
   1   6  12    3.68    2.29
   6  -1 -12    4.17    1.39
   1   6 -12    3.71    1.29
   6  -1 -12    5.82    2.42
   1   6 -12    6.49    1.40
  -1  -6 -12    4.62    2.34
  -6   1  13    0.17    1.05
   1   6  13    4.33    2.46
   6  -1  13    5.82    2.09
  -1  -6  13    5.11    1.89
   6  -1 -13    5.31    2.44
   6  -1 -13    5.83    1.46
   1   6 -13    6.05    0.90
   1   6 -13    3.91    1.48
  -1  -6 -13    5.11    1.53
  -1  -6  14    1.05    1.90
  -6   1  14   -0.24    1.13
   1   6  14    0.84    1.55
   6  -1  14    0.76    1.28
  -1  -6 -14    0.04    0.97
   1   6 -14   -0.52    0.94
   6  -1 -14   -0.60    0.61
   1   6 -14    0.01    0.59
   6  -1 -14   -0.12    1.02
   1   6  15    7.65    1.99
  -6   1  15    9.76    1.52
  -1  -6  15    9.87    2.60
  -1  -6 -15    7.84    2.03
   6  -1 -15    9.26    2.12
   1   6 -15    8.09    3.02
   6  -1 -15    8.52    1.31
  -6   1 -15    9.70    2.20
  -6   1  16    0.13    1.43
  -1  -6  16   -0.23    1.58
   6  -1  16   -0.81    1.66
   1   6  16    2.12    1.24
   6  -1 -16    0.22    1.21
   1   6 -16    1.06    1.16
  -6   1 -16    0.09    1.90
  -1  -6 -16   -0.22    1.32
   6  -1 -16    0.41    1.20
   1   6 -16   -0.08    1.08
   1   6  17    5.43    1.79
  -1  -6  17    3.61    2.25
   6  -1  17    4.10    2.34
  -6   1  17    0.11    1.24
   6  -1 -17    5.12    2.73
   1   6 -17    6.56    1.63
  -6   1 -17    0.05    1.81
  -6   1 -17    3.87    2.09
  -1  -6 -17    3.62    2.09
   6  -1 -17    2.28    1.12
   7  -1   0   22.26    0.97
  -7   1   0   21.40    1.40
  -1  -7   0   23.14    1.12
  -7   1   0   23.37    1.09
   7  -1   1  107.53    3.03
  -7   1   1  105.34    2.33
   1   7   1  105.96    2.85
  -7   1   1  110.10    3.02
  -7   1  -1  102.47    2.93
  -1  -7  -1  102.60    2.77
   7  -1  -1  107.34    2.66
  -1  -7   2  269.31    8.11
   1   7   2  257.80    6.50
   7  -1   2  257.04    7.10
  -7   1   2  259.97    5.06
  -7   1   2  268.19    7.07
   7  -1  -2  266.10    6.89
   7  -1  -2  267.08    5.22
  -1  -7  -2  252.84    6.41
  -7   1  -2  253.68    6.99
  -1  -7   3   26.53    1.52
   1   7   3   27.35    1.36
   7  -1   3   26.64    1.70
  -7   1   3   26.36    0.46
  -7   1   3   27.08    1.53
  -7   1   3   25.83    0.53
   7  -1  -3   27.11    1.49
  -1  -7  -3   26.92    2.07
  -7   1  -3   25.35    1.64
  -1  -7   4   11.12    1.15
   7  -1   4    6.77    1.34
  -7   1   4    8.09    1.19
  -1  -7   4    8.09    0.40
   1   7   4    9.85    0.99
  -7   1  -4    9.51    1.28
   1   7  -4    8.97    1.03
   7  -1  -4    9.28    1.13
  -1  -7  -4    7.54    1.02
  -7   1   5  171.80    5.54
  -1  -7   5  170.98    5.53
  -7   1   5  172.55    3.06
  -7   1   5  171.02    3.27
  -1  -7   5  163.22    3.08
   1   7   5  168.85    4.94
   1   7  -5  177.31    5.29
  -1  -7  -5  171.92    5.23
  -7   1  -5  163.52    7.32
   7  -1  -5  176.07    5.52
   1   7   6   26.48    1.63
  -7   1   6   26.64    1.93
  -7   1   6   26.76    0.94
  -1  -7   6   28.04    1.99
   1   7  -6   25.17    1.74
  -1  -7  -6   23.55    2.72
   7  -1  -6   25.59    1.82
  -7   1  -6   25.16    2.17
  -7   1   7    1.62    1.08
  -7   1   7    1.79    0.55
  -1  -7   7    1.95    1.06
   1   7   7    1.99    1.38
   7  -1   7    2.13    1.24
   1   7  -7    1.95    0.90
   1   7  -7    1.73    0.24
   7  -1  -7    1.86    0.42
  -7   1  -7    1.15    1.14
   7  -1  -7    4.18    1.52
  -1  -7  -7    1.71    0.95
  -1  -7   8   16.45    1.81
   7  -1   8   14.53    2.03
  -7   1   8   14.50    0.78
  -7   1   8   14.59    1.81
   1   7   8   12.69    1.49
   7  -1  -8   11.97    1.64
   1   7  -8   15.67    1.54
   7  -1  -8   14.40    0.95
  -1  -7  -8   15.22    1.61
   1   7  -8   14.55    0.84
  -1  -7   9   35.98    2.76
  -7   1   9   38.15    1.99
   1   7   9   37.12    3.42
   7  -1   9   40.23    3.20
  -1  -7  -9   39.09    2.39
   7  -1  -9   37.50    2.51
   1   7  -9   38.93    2.46
  -7   1  -9   33.95    2.95
   7  -1  -9   35.53    1.28
   1   7  -9   36.02    1.49
  -1  -7  10   31.85    2.81
  -7   1  10   28.53    1.42
   1   7  10   29.04    3.44
  -1  -7 -10   28.13    2.32
   1   7 -10   25.30    3.44
   7  -1 -10   26.36    1.68
   1   7 -10   27.01    1.13
   7  -1 -10   27.41    2.41
   1   7  11   -1.60    0.77
  -1  -7  11    0.36    1.00
  -7   1  11   -0.17    0.75
   1   7 -11    0.19    0.34
   7  -1 -11    0.16    0.61
  -7   1 -11   -1.26    0.99
   7  -1 -11    0.29    0.85
   1   7 -11   -0.64    1.28
  -1  -7 -11    1.71    0.81
  -1  -7  12    4.36    2.82
   1   7  12    3.89    1.38
  -7   1  12    5.30    0.88
   7  -1 -12    3.57    1.52
   1   7 -12    5.15    0.71
   1   7 -12    5.01    2.27
  -1  -7 -12    6.26    1.50
   7  -1 -12    3.58    1.17
  -7   1  13    1.67    0.80
   1   7  13    1.39    1.30
  -1  -7  13    2.33    1.61
  -1  -7 -13    2.45    1.31
   7  -1 -13    1.94    0.70
   7  -1 -13    1.86    1.34
   1   7 -13    1.60    0.65
   1   7 -13    1.84    1.27
   1   7  14    8.29    1.87
  -1  -7  14    7.08    2.36
   7  -1 -14    8.56    1.95
   1   7 -14    6.88    1.86
   1   7 -14    8.44    1.01
   7  -1 -14    8.93    1.12
  -1  -7 -14    7.48    2.93
  -7   1  15   -0.06    0.73
   1   7  15    0.72    1.73
  -1  -7  15   -0.22    2.30
   1   7 -15    1.19    1.04
   1   7 -15    0.02    0.56
   7  -1 -15    0.49    0.62
   7  -1 -15    0.84    1.77
  -1  -7 -15   -0.86    1.12
   1   7  16    0.54    1.13
  -7   1  16   -0.22    0.75
  -1  -7  16   -1.10    1.49
   7  -1 -16    0.01    1.03
  -1  -7 -16    1.95    1.24
  -7   1 -16   -0.07    1.17
   7  -1 -16   -0.74    1.10
   1   7 -16   -1.36    1.08
   1   7  17    0.39    1.09
  -1  -7  17    1.76    1.46
   7  -1 -17   -2.46    1.08
   1   7 -17    0.14    1.01
  -1  -7 -17    4.21    2.06
  -7   1 -17   -0.11    1.74
  -8   1   0    0.07    0.44
  -1  -8   0   -0.19    0.44
   8  -1   0    0.47    0.37
  -8   1   0    0.28    0.59
   1   8   1  102.76    2.99
  -8   1   1  105.12    2.47
   8  -1   1  104.28    3.81
  -8   1   1  108.87    3.15
  -1  -8  -1  100.56    2.87
   8  -1  -1  108.01    2.41
  -8   1  -1  103.36    3.02
  -8   1   2    1.07    0.40
  -1  -8   2    0.67    1.15
  -8   1   2    1.12    1.12
   8  -1   2    1.74    0.69
   1   8   2    1.26    0.61
   8  -1  -2    1.04    0.23
  -1  -8  -2    1.18    0.61
  -8   1  -2    1.54    0.68
   8  -1  -2    1.57    0.69
  -8   1   3   25.56    1.63
  -1  -8   3   28.09    1.64
  -8   1   3   25.24    0.66
   1   8   3   26.68    1.41
   8  -1   3   25.25    1.71
  -8   1  -3   23.31    1.68
   8  -1  -3   27.33    1.57
  -1  -8  -3   25.41    1.45
  -8   1   4   71.20    2.90
   8  -1   4   67.60    3.13
  -8   1   4   71.50    1.12
  -8   1   4   70.13    1.06
  -1  -8   4   67.83    2.81
   1   8   4   73.58    2.55
  -1  -8   4   72.49    1.36
   8  -1  -4   72.86    2.78
  -1  -8  -4   67.38    2.58
  -8   1  -4   67.53    3.04
  -8   1   5   29.55    1.90
  -1  -8   5   26.65    1.96
  -8   1   5   26.90    0.53
  -8   1   5   26.73    0.50
  -1  -8   5   28.01    0.68
   1   8   5   28.38    1.62
   8  -1   5   26.46    2.18
  -1  -8  -5   25.78    1.70
   1   8  -5   29.37    1.74
   8  -1  -5   27.41    1.81
   1   8   6  577.41   17.07
  -8   1   6  579.28   12.27
  -8   1   6  547.80   19.65
  -8   1   6  555.26   12.40
  -1  -8   6  569.72   18.41
   8  -1   6  553.92   18.97
   1   8  -6  587.53   17.71
   8  -1  -6  560.12   17.49
  -1  -8  -6  594.12   18.05
  -8   1  -6  550.27   18.51
   1   8   7    1.86    1.45
   8  -1   7    1.64    1.35
  -1  -8   7    2.26    1.15
  -8   1   7    2.38    0.45
  -8   1   7    2.76    1.80
   8  -1  -7    2.07    1.03
  -8   1  -7    2.22    1.21
   1   8  -7    0.62    0.98
  -1  -8  -7    1.84    1.01
  -8   1   8    3.01    2.09
   1   8   8    3.41    1.04
  -8   1   8    3.32    0.43
  -1  -8   8    3.15    1.31
   8  -1   8    1.34    1.57
  -1  -8  -8    3.42    1.80
   8  -1  -8    3.80    1.17
   1   8  -8    2.79    1.77
  -8   1   9    0.31    0.51
  -8   1   9    1.02    0.93
  -1  -8   9   -0.39    0.93
   1   8   9    0.35    1.15
   1   8  -9    0.26    0.21
   1   8  -9    1.12    0.79
  -1  -8  -9   -0.56    1.20
   8  -1  -9   -0.41    0.25
  -8   1  -9    0.30    1.00
   8  -1  -9    0.90    0.80
  -8   1  10   38.35    1.53
   1   8  10   37.51    2.64
  -1  -8  10   41.32    4.91
   1   8 -10   40.60    2.81
   8  -1 -10   36.07    1.80
  -1  -8 -10   41.75    4.20
   1   8 -10   35.27    1.14
   8  -1 -10   39.57    2.89
  -1  -8  11    2.25    1.51
   1   8  11    3.38    1.19
  -8   1  11    3.33    0.97
   1   8 -11    2.36    0.68
  -1  -8 -11    2.40    2.01
   8  -1 -11    1.57    2.06
   8  -1 -11    2.12    0.52
   1   8 -11    1.57    1.28
   1   8  12   -0.70    0.84
   8  -1  12   -0.67    1.30
  -1  -8  12   -0.07    1.12
  -8   1  12   -0.26    0.46
   1   8 -12    0.16    0.54
  -1  -8 -12   -1.08    1.46
   8  -1 -12    0.35    0.39
   8  -1 -12   -0.47    0.90
   1   8 -12   -1.15    0.92
   1   8  13   -0.93    0.93
  -8   1  13    1.18    0.80
  -1  -8  13    0.80    1.27
  -1  -8 -13    0.39    0.99
   1   8 -13    0.72    0.97
   8  -1 -13   -0.48    0.99
   1   8 -13    0.71    0.40
   8  -1 -13   -0.83    0.45
   1   8  14    8.71    1.88
  -1  -8  14    7.33    3.84
   8  -1 -14    7.03    0.98
   8  -1 -14    9.00    2.00
   1   8 -14   10.46    1.92
   1   8 -14    7.94    1.29
  -1  -8 -14    6.74    1.92
   1   8  15   -0.54    1.09
  -8   1  15    0.01    1.05
  -1  -8  15    0.49    1.50
   8  -1 -15    0.64    0.56
   8  -1 -15   -0.07    1.15
  -1  -8 -15    0.28    1.18
   1   8 -15    0.85    1.13
   1   8 -15    0.08    0.77
  -1  -8  16    0.59    1.85
   1   8  16   -0.14    1.34
  -1  -8 -16    1.04    2.44
   1   8 -16    2.81    1.98
   8  -1 -16    0.56    1.33
  -9   1   0   30.19    2.12
   9  -1   0   33.06    1.29
  -9   1   0   28.27    1.81
  -1  -9   0   30.64    1.48
  -9   1   1   63.55    2.29
  -9   1   1   60.67    1.67
  -1  -9   1   63.12    2.22
   9  -1   1   61.15    2.12
   9  -1  -1   63.26    1.63
  -1  -9  -1   59.47    2.13
  -9   1  -1   60.99    2.17
  -1  -9   2   95.56    3.23
  -9   1   2   97.04    3.19
   1   9   2   97.93    3.86
  -9   1   2   97.78    2.50
   9  -1   2   89.83    3.17
  -9   1  -2   95.23    3.28
  -1  -9  -2  102.36    3.08
   9  -1  -2   97.47    2.31
   1   9   3   61.20    2.28
   9  -1   3   56.90    2.66
  -9   1   3   60.75    3.60
  -1  -9   3   63.08    2.61
  -9   1   3   60.20    1.36
   9  -1  -3   60.66    3.39
   9  -1  -3   58.04    1.17
  -1  -9  -3   60.19    3.13
  -9   1  -3   58.44    3.53
  -9   1   4    6.35    0.22
  -1  -9   4    6.58    0.34
  -1  -9   4    6.16    1.23
  -9   1   4    5.77    0.24
  -9   1   4    7.83    1.21
   1   9   4    6.69    0.96
  -1  -9  -4    6.26    1.04
   9  -1  -4    5.26    1.11
  -9   1  -4    5.99    1.23
  -1  -9   5   35.01    0.67
   1   9   5   32.08    1.82
  -9   1   5   33.75    2.21
  -1  -9   5   33.18    2.18
  -9   1  -5   33.17    2.33
  -1  -9  -5   34.72    1.95
   9  -1  -5   32.38    2.04
   1   9   6   69.00    2.86
  -9   1   6   68.24    3.34
  -9   1   6   63.34    1.00
  -1  -9   6   64.37    3.24
  -9   1   6   68.48    1.11
  -1  -9  -6   71.19    3.08
   1   9  -6   67.77    3.06
   9  -1  -6   67.53    3.20
  -9   1  -6   65.90    3.52
   1   9   7   10.24    2.05
  -1  -9   7   12.41    2.60
  -9   1   7   11.10    1.67
  -9   1   7   11.02    0.52
  -9   1   7   10.47    0.42
   1   9  -7   11.58    2.30
  -9   1  -7   11.54    1.75
  -1  -9  -7   10.51    2.30
   9  -1  -7    9.34    1.53
   1   9   8   -0.17    0.75
  -9   1   8    0.36    0.23
  -9   1   8   -0.78    0.94
  -1  -9   8    0.00    0.97
  -1  -9  -8    0.17    0.82
   9  -1  -8   -0.41    0.86
   1   9  -8    1.12    0.81
   1   9   9    0.93    1.57
  -9   1   9    1.27    1.30
  -9   1   9    0.69    0.58
  -1  -9   9    3.49    1.31
   9  -1  -9    1.79    1.85
  -1  -9  -9    1.21    1.06
   1   9  -9    1.02    1.08
  -9   1  10    3.73    0.81
   1   9  10    4.43    1.27
  -1  -9  10    3.93    1.72
  -9   1  10    0.61    1.64
  -1  -9 -10    4.53    1.39
   9  -1 -10    3.16    1.48
   1   9 -10    4.40    1.39
   9  -1  11    1.99    1.72
  -9   1  11    2.26    0.51
   1   9  11    1.39    1.11
  -1  -9  11    0.99    1.51
  -1  -9 -11    0.72    1.27
   1   9 -11   -0.14    1.93
   9  -1 -11    2.86    1.28
   1   9  12    8.61    1.61
  -1  -9  12    8.34    2.18
  -9   1  12    8.91    1.24
  -1  -9 -12   10.71    1.84
   1   9 -12    6.10    2.74
   9  -1 -12    8.45    1.79
   1   9 -12    7.32    0.56
  -9   1  13    0.49    0.45
  -1  -9  13   -1.09    1.21
   1   9  13    0.05    0.85
   1   9 -13   -0.21    0.28
   1   9 -13   -0.63    1.50
   9  -1 -13   -0.63    1.00
   9  -1 -13   -0.02    0.37
  -1  -9 -13   -0.03    0.98
  -1  -9  14    1.44    1.67
  -9   1  14    0.45    0.94
   1   9  14    0.72    1.15
   9  -1 -14    0.88    0.52
  -1  -9 -14    0.86    2.00
   1   9 -14    0.58    0.37
   1   9 -14    1.80    1.20
   9  -1 -14    0.37    1.31
  -1  -9  15    4.27    1.85
   1   9  15    0.20    1.25
  -1  -9 -15    1.10    1.48
   9  -1 -15   -0.02    2.20
   1   9 -15    0.81    1.33
   1   9  16    0.01    1.67
  -1  -9  16    5.22    2.41
   9  -1 -16    4.11    1.68
   1   9 -16    4.83    1.65
  -1  -9 -16    1.01    1.96
 -10   1   0   -0.24    0.64
  10  -1   0    0.24    0.41
  -1 -10   0   -0.14    0.82
 -10   1   0   -0.06    0.85
  -1 -10   1   18.24    1.35
  10  -1   1   18.59    1.95
 -10   1   1   18.37    0.94
 -10   1   1   19.82    1.44
  -1 -10  -1   19.13    1.36
  10  -1  -1   18.84    1.33
 -10   1  -1   19.55    1.26
  -1 -10   2   63.24    2.60
 -10   1   2   61.84    1.57
 -10   1   2   61.75    2.60
  10  -1   2   62.16    2.51
   1  10   2   66.39    2.39
 -10   1  -2   61.87    2.50
  -1 -10  -2   64.27    3.35
  10  -1  -2   64.43    1.84
 -10   1   3    0.85    0.33
  10  -1   3   -0.26    0.75
 -10   1   3    0.55    0.75
  -1 -10   3    0.81    0.78
   1  10   3    0.17    0.63
  10  -1  -3    0.40    0.27
  10  -1  -3    0.68    0.74
  -1 -10  -3    1.09    0.65
 -10   1  -3    0.12    1.18
 -10   1   4  280.76    5.21
 -10   1   4  295.40    5.70
 -10   1   4  292.50   10.76
  10  -1   4  291.86    9.54
   1  10   4  293.12    8.30
  -1 -10   4  301.45    9.48
  -1 -10  -4  282.69    8.30
  10  -1  -4  291.17    8.90
 -10   1  -4  276.17    9.13
 -10   1   5   64.30    4.36
   1  10   5   62.46    2.58
  -1 -10   5   63.00    3.17
  10  -1   5   59.02    3.27
  -1 -10   5   65.15    1.05
  10  -1  -5   62.84    4.06
  -1 -10  -5   63.14    2.69
 -10   1  -5   61.79    3.28
  -1 -10   6    5.81    1.39
 -10   1   6    4.88    2.21
   1  10   6    6.15    1.08
  10  -1   6    5.58    1.58
  10  -1  -6    7.69    1.28
  -1 -10  -6    6.30    1.90
   1  10  -6    0.37    1.39
 -10   1   7   10.87    2.74
  -1 -10   7   12.16    1.80
   1  10   7   10.58    1.39
  -1 -10  -7    9.92    1.57
   1  10  -7    9.37    1.50
 -10   1  -7   10.80    1.82
  10  -1  -7   10.43    2.48
 -10   1   8   41.94    4.61
  -1 -10   8   47.85    3.36
 -10   1   8   41.94    1.05
   1  10   8   42.46    2.45
 -10   1   8   43.59    0.81
  -1 -10  -8   44.24    2.74
   1  10  -8   47.30    2.87
  10  -1  -8   46.16    2.99
  10  -1   9    0.21    1.22
 -10   1   9    0.32    1.09
 -10   1   9    0.30    0.26
 -10   1   9   -0.11    0.32
   1  10   9    0.09    0.80
  -1 -10   9    0.14    1.10
  10  -1  -9   -0.96    0.96
  -1 -10  -9    1.59    0.88
   1  10  -9   -1.13    1.48
 -10   1  10    5.23    1.81
   1  10  10    5.87    1.31
  -1 -10  10    5.25    1.81
 -10   1  10    4.78    0.66
  -1 -10 -10    5.41    2.37
  10  -1 -10    5.90    1.61
   1  10 -10    5.62    1.53
 -10   1  11   -0.20    0.28
  -1 -10  11   -0.16    1.73
   1  10  11    0.87    0.78
  10  -1 -11   -0.42    0.93
   1  10 -11    0.33    0.89
  -1 -10 -11   -0.05    1.43
   1  10  12    0.96    1.87
 -10   1  12    1.58    0.80
  -1 -10  12    1.07    1.78
  10  -1 -12    1.88    1.46
   1  10 -12    2.26    1.33
 -10   1 -12    3.26    1.79
  -1 -10 -12    2.99    1.44
  -1 -10  13    2.65    1.66
 -10   1  13    1.45    0.49
   1  10 -13   -0.09    1.32
  -1 -10 -13    1.92    1.32
  10  -1 -13    0.27    1.32
  -1 -10  14    1.38    1.41
  -1 -10 -14    0.51    1.07
  10  -1 -14   -0.46    1.03
   1  10 -14   -0.43    1.00
   1  10  15    3.28    2.45
  -1 -10  15    4.62    2.53
   1  10 -15    3.72    1.77
  10  -1 -15    6.32    1.85
  -1 -10 -15    3.83    1.98
   1  10  16    4.01    2.46
  -1 -10  16    4.19    2.41
  10  -1 -16    1.37    1.69
  -1 -10 -16    4.37    1.93
   1  10 -16    0.48    1.60
 -11   1   0  543.49   15.22
 -11   1   0  554.89   16.00
  -1 -11   0  546.48   17.27
  11  -1   0  557.19   15.39
 -11   1   1   91.49    3.14
  11  -1   1   88.17    3.07
  -1 -11   1   91.98    3.11
 -11   1   1   93.38    3.33
 -11   1  -1   89.61    3.07
  11  -1  -1   90.88    2.48
  -1 -11  -1   88.84    3.11
 -11   1   2    0.34    0.32
  -1 -11   2   -0.17    1.12
 -11   1   2    0.23    0.73
  11  -1   2    0.83    0.68
 -11   1  -2    0.31    0.65
  11  -1  -2    0.28    0.47
  -1 -11  -2    0.62    0.64
 -11   1   3    0.20    0.36
  11  -1   3   -1.25    0.73
  -1 -11   3    1.72    1.24
   1  11   3    1.14    0.97
 -11   1   3    1.23    0.75
 -11   1  -3   -0.39    0.70
  11  -1  -3    0.27    0.29
  -1 -11  -3    0.55    0.65
  -1 -11   4   31.91    2.33
 -11   1   4   34.34    2.29
 -11   1   4   31.99    0.86
   1  11   4   34.41    2.73
  -1 -11  -4   30.58    1.89
  11  -1  -4   33.04    2.15
 -11   1  -4   32.04    2.26
  -1 -11   5    3.06    0.16
  11  -1   5    3.12    1.32
 -11   1   5    3.02    1.19
  -1 -11   5    4.27    1.20
   1  11   5    1.74    1.48
  -1 -11  -5    4.42    1.02
 -11   1  -5    3.44    1.24
  11  -1  -5    3.49    1.13
  -1 -11   6   24.09    2.17
   1  11   6   23.76    1.72
  11  -1   6   21.90    2.43
 -11   1   6   22.34    2.14
  -1 -11  -6   21.94    1.87
  11  -1  -6   20.04    2.04
 -11   1   7   -0.10    1.00
  11  -1   7    0.02    1.14
   1  11   7    0.78    0.73
  -1 -11   7   -0.04    1.03
   1  11  -7    0.01    1.01
  11  -1  -7    0.27    0.93
 -11   1  -7    0.56    1.10
  -1 -11  -7    0.13    1.34
 -11   1   8   27.71    2.87
   1  11   8   32.61    3.23
  -1 -11   8   29.85    2.90
  -1 -11  -8   27.22    2.39
  11  -1  -8   26.84    2.66
   1  11  -8   26.89    2.49
  -1 -11   9    8.01    3.00
   1  11   9    7.86    1.43
 -11   1   9    7.52    1.94
 -11   1   9    6.54    0.27
   1  11  -9    8.43    1.65
  11  -1  -9    7.64    1.74
  -1 -11  -9    8.44    1.56
 -11   1  10   -0.20    1.14
 -11   1  10    0.28    0.16
 -11   1  10    0.15    0.22
   1  11  10   -0.39    0.82
  -1 -11  10    0.89    1.16
  11  -1 -10    1.17    1.65
   1  11 -10    0.06    0.94
  -1 -11 -10    0.00    0.98
  -1 -11  11    5.90    1.95
 -11   1  11    4.43    0.32
 -11   1  11    5.24    0.55
 -11   1  11    0.59    1.82
   1  11  11    4.38    2.17
  -1 -11 -11    5.89    1.64
   1  11 -11    4.83    2.41
  11  -1 -11    5.56    1.71
 -11   1  12    8.12    0.78
  -1 -11  12    8.37    2.41
   1  11  12   11.28    1.70
 -11   1  12    7.38    0.47
  -1 -11 -12    7.72    1.92
   1  11 -12    7.34    2.82
  11  -1 -12    7.70    2.03
   1  11  13    1.59    1.19
  -1 -11  13    1.47    1.83
   1  11 -13    0.39    2.04
  -1 -11 -13    0.96    1.36
  11  -1 -13    1.42    1.46
  -1 -11  14   -2.37    1.33
   1  11  14    0.36    0.84
  -1 -11 -14    0.19    1.01
  11  -1 -14    1.49    1.06
   1  11 -14   -1.41    1.53
  -1 -11  15    0.84    1.98
   1  11  15    0.83    1.29
  -1 -11 -15    0.29    2.37
   1  11 -15    1.44    1.34
  11  -1 -15   -0.40    2.41
   1  11  16    1.17    1.31
  -1 -11  16    1.84    2.03
   1  11 -16    0.85    1.35
  11  -1 -16   -2.01    2.32
  -1 -11 -16    0.04    1.57
 -12   1   0    0.19    0.51
  -1 -12   0    0.94    0.67
  12  -1   0   -0.43    0.53
 -12   1   0    0.55    0.69
  12  -1   1    2.33    1.29
 -12   1   1    2.48    0.57
  -1 -12   1    1.70    1.47
 -12   1   1    4.12    0.97
 -12   1  -1    1.90    0.78
 -12   1  -1    2.55    0.87
  -1 -12  -1    2.50    0.86
  12  -1  -1    1.12    0.90
 -12   1   2   10.89    1.10
  12  -1   2   11.82    1.39
 -12   1   2   12.99    1.50
  -1 -12   2   14.69    2.31
  -1 -12  -2   11.75    1.33
  12  -1  -2   12.08    0.70
 -12   1  -2   13.29    2.02
  -1 -12   3   71.83    4.66
 -12   1   3   76.18    3.36
 -12   1   3   72.48    2.14
  12  -1   3   69.47    3.21
   1  12   3   71.76    2.83
  -1 -12  -3   71.25    2.97
 -12   1  -3   72.03    3.20
  12  -1  -3   71.09    1.86
 -12   1   4   30.84    2.26
 -12   1   4   30.54    0.92
  12  -1   4   27.59    2.24
  -1 -12   4   30.92    2.30
   1  12   4   30.05    1.83
  12  -1  -4   28.00    2.13
  -1 -12  -4   29.46    1.94
 -12   1  -4   27.12    2.20
  -1 -12   5   90.32    4.29
  -1 -12   5   92.65    1.54
 -12   1   5   91.45    4.22
   1  12   5   88.83    3.51
  12  -1  -5   90.24    4.07
  -1 -12  -5   86.45    4.97
  -1 -12   6   19.24    2.09
 -12   1   6   15.21    2.03
   1  12   6   13.78    2.39
  -1 -12  -6   14.65    1.71
  12  -1  -6   14.18    1.91
   1  12   7   10.71    1.41
  -1 -12   7    7.65    3.18
 -12   1   7    8.88    1.93
  -1 -12  -7   10.64    1.63
 -12   1  -7    8.25    2.02
  12  -1  -7    9.84    1.76
 -12   1   8   20.10    2.62
   1  12   8   22.64    1.95
  -1 -12   8   20.14    4.02
  -1 -12  -8   16.49    2.12
  12  -1  -8   20.08    3.72
 -12   1   9    3.93    3.01
   1  12   9    6.60    1.35
  -1 -12   9    5.34    1.92
  -1 -12  -9    5.46    1.55
   1  12  -9    5.83    1.62
  12  -1  -9    5.74    1.72
 -12   1  10   11.29    3.73
  -1 -12  10   13.34    2.51
   1  12  10   13.91    2.70
   1  12 -10   13.35    2.13
  -1 -12 -10   15.79    3.19
  12  -1 -10   11.57    2.20
  -1 -12  11   -0.96    1.05
 -12   1  11    0.43    0.97
   1  12  11    0.10    0.73
  -1 -12 -11    0.80    1.40
   1  12 -11   -0.04    0.85
  12  -1 -11   -0.08    0.91
   1  12  12    0.23    0.80
  -1 -12  12   -0.11    1.82
  12  -1 -12   -0.34    0.97
   1  12 -12   -0.05    0.90
  -1 -12 -12    0.03    1.49
  -1 -12  13    2.78    1.83
   1  12  13    2.00    1.19
  -1 -12 -13    0.03    1.41
   1  12 -13   -0.04    1.05
  12  -1 -13    2.09    1.45
  -1 -12  14   -1.48    1.88
   1  12  14   -1.09    1.14
  12  -1 -14    0.61    1.44
   1  12 -14   -0.54    1.33
  -1 -12 -14   -1.34    1.45
  -1 -12  15    0.94    2.10
   1  12  15    0.30    1.33
  -1 -12 -15    1.76    1.63
  12  -1 -15    0.33    1.56
   1  12 -15    1.45    1.42
 -13   1   0   55.26    2.23
 -13   1   0   60.00    2.71
  -1 -13   0   56.88    2.62
  13  -1   0   59.10    2.30
 -13   1   1   93.75    3.00
 -13   1   1   98.54    3.86
  -1 -13   1   99.72    3.69
  13  -1   1   96.09    3.56
  -1 -13  -1   95.36    3.57
  13  -1  -1   95.17    2.87
 -13   1  -1   98.00    3.64
 -13   1  -1   92.60    3.49
 -13   1   2   23.85    1.96
  13  -1   2   21.69    1.80
 -13   1   2   21.50    1.06
  -1 -13   2   24.27    1.87
  -1 -13   2   22.35    2.99
  -1 -13  -2   22.82    1.77
 -13   1  -2   23.84    2.63
  13  -1  -2   23.11    0.98
  13  -1   3    1.47    1.05
 -13   1   3    1.61    1.12
 -13   1   3    1.79    0.38
  -1 -13   3    2.63    1.81
  13  -1  -3    1.85    0.33
 -13   1  -3    1.75    1.00
  -1 -13  -3    1.29    1.54
   1  13   4    7.01    1.18
 -13   1   4    6.51    0.57
  -1 -13   4    8.56    2.50
 -13   1   4    8.15    1.54
 -13   1  -4    6.22    1.46
  -1 -13  -4    6.14    1.27
   1  13   5   78.39    3.32
 -13   1   5   85.23    4.23
  -1 -13   5   71.83    1.26
  -1 -13   5   78.58    1.40
  13  -1   5   74.19    4.07
  -1 -13   5   84.68    5.88
  -1 -13  -5   75.92    3.47
  13  -1  -5   80.76    3.91
  13  -1   6    0.18    1.06
   1  13   6    0.17    0.71
  -1 -13   6    1.29    1.57
 -13   1   6    0.54    0.99
  13  -1  -6   -0.71    0.91
  -1 -13  -6   -0.02    1.24
 -13   1   7    1.44    1.39
   1  13   7    0.73    1.57
  -1 -13   7    0.80    1.37
  -1 -13  -7    2.15    1.14
  13  -1  -7    0.14    1.25
 -13   1  -7    1.18    1.37
 -13   1   8    3.52    2.19
  -1 -13   8    1.29    1.44
   1  13   8    0.86    0.99
  -1 -13  -8    0.41    1.09
  13  -1  -8    1.15    1.21
   1  13   9   42.00    3.98
  -1 -13   9   43.52    3.91
 -13   1   9   42.34    3.68
  13  -1  -9   47.36    3.35
  -1 -13  -9   44.26    3.12
  -1 -13  10   29.66    3.29
   1  13  10   23.95    2.26
 -13   1  10   22.29    2.98
  13  -1 -10   23.82    4.13
  -1 -13 -10   26.89    2.74
   1  13  11   17.38    2.02
 -13   1  11   16.60    2.58
  -1 -13  11   14.62    4.56
  -1 -13 -11   15.64    2.52
  13  -1 -11   13.92    3.81
  -1 -13  12    0.56    1.39
   1  13  12    0.52    0.94
  13  -1 -12    0.28    1.17
  -1 -13 -12   -0.64    1.15
   1  13 -12    0.25    1.10
   1  13  13    3.56    2.18
  -1 -13  13    6.17    2.17
  13  -1 -13    3.96    1.77
   1  13 -13   -0.12    1.36
  -1 -13 -13    4.49    1.76
  -1 -13  14    2.71    2.07
   1  13  14    1.44    1.91
   1  13 -14    1.14    1.50
  13  -1 -14    0.09    1.56
  -1 -13 -14    1.32    1.61
  -1 -13  15   10.33    3.94
   1  13  15    0.90    2.49
  -1 -13 -15    2.00    1.99
  13  -1 -15    0.75    2.96
   1  13 -15    2.34    1.77
  14  -1   0   -1.81    0.82
 -14   1   0    0.81    0.69
  -1 -14   0    0.32    0.65
 -14   1   0    0.03    0.51
 -14   1   1   11.55    1.68
  -1 -14   1   14.43    1.70
 -14   1   1   12.43    1.06
  -1 -14   1   12.83    1.58
  14  -1   1   16.76    2.26
  -1 -14  -1   12.73    1.56
  14  -1  -1   13.88    1.07
 -14   1  -1   13.16    2.11
 -14   1  -1   12.34    1.54
  14  -1   2   17.81    1.82
  -1 -14   2   20.42    1.81
 -14   1   2   22.29    2.03
  -1 -14   2   20.24    2.02
 -14   1   2   19.53    1.09
 -14   1  -2   17.90    1.77
  -1 -14  -2   21.62    1.77
  14  -1  -2   21.63    1.00
 -14   1   3    8.46    1.73
  14  -1   3    9.35    1.59
  -1 -14   3   10.39    1.74
 -14   1   3   10.20    0.99
  -1 -14  -3   11.48    2.34
  14  -1  -3    9.43    0.57
 -14   1  -3    8.47    1.50
 -14   1   4   81.21    1.91
 -14   1   4   79.89    4.05
   1  14   4   74.61    3.29
  -1 -14   4   86.34    6.08
 -14   1  -4   77.56    3.95
  -1 -14  -4   75.39    3.53
  -1 -14   5   26.03    0.70
 -14   1   5   27.23    2.61
  -1 -14   5   24.51    4.02
   1  14   5   25.97    2.91
  -1 -14   5   26.06    0.61
  -1 -14  -5   23.54    2.11
  -1 -14   6   -1.39    1.09
 -14   1   6   -1.49    1.75
   1  14   6    0.62    0.77
  14  -1  -6   -0.11    0.99
  -1 -14  -6   -0.17    0.86
   1  14   7   45.36    2.68
 -14   1   7   43.73    5.04
  -1 -14   7   40.86    3.52
 -14   1  -7   39.78    3.42
  -1 -14  -7   38.17    2.71
  14  -1  -7   43.87    3.10
 -14   1   8   28.46    2.90
  -1 -14   8   25.68    3.10
   1  14   8   24.15    2.12
  -1 -14  -8   22.52    3.43
  14  -1  -8   23.36    3.89
   1  14   9    0.66    0.93
 -14   1   9    1.83    1.33
  -1 -14   9    0.38    1.46
  14  -1  -9   -0.93    1.20
  -1 -14  -9    1.31    1.75
  -1 -14  10    7.56    2.35
 -14   1  10    7.05    2.19
   1  14  10    7.58    1.58
  -1 -14 -10    7.08    1.93
  14  -1 -10    7.02    1.96
 -14   1  11   -0.08    1.29
   1  14  11    0.76    1.46
  -1 -14  11   -0.50    1.35
  14  -1 -11   -0.15    1.15
  -1 -14 -11   -0.83    1.17
   1  14  12   -0.27    1.70
 -14   1  12    0.31    1.44
  -1 -14  12    3.05    1.59
  14  -1 -12   -1.14    1.32
  -1 -14 -12    0.91    1.33
  -1 -14  13   -1.41    1.52
   1  14  13   -0.04    0.97
  14  -1 -13    0.05    1.23
  -1 -14 -13    0.86    1.95
  -1 -14  14    2.56    2.99
   1  14  14   -0.23    1.20
  14  -1 -14    1.18    1.42
  -1 -14 -14    0.10    2.26
  -1 -14  15   -0.72    2.42
   1  14  15    1.87    1.48
  -1 -14 -15    2.75    2.97
  14  -1 -15    2.52    1.73
 -15   1   0  306.41   11.26
 -15   1   0  313.14   10.56
  -1 -15   0  297.88   10.03
  15  -1   0  308.97    9.54
 -15   1   1    6.75    1.60
  15  -1   1    6.66    1.28
  -1 -15   1    7.56    1.44
  -1 -15   1    5.77    1.57
 -15   1   1    8.98    1.53
  -1 -15  -1    8.03    1.49
 -15   1  -1    6.26    2.26
 -15   1  -1    6.92    1.24
  15  -1  -1    9.16    1.47
 -15   1   2   17.74    2.05
  15  -1   2   17.23    1.80
  -1 -15   2   16.96    2.02
 -15   1   2   17.01    1.65
  -1 -15   2   16.45    2.89
 -15   1  -2   18.44    1.78
  -1 -15  -2   17.39    1.78
  15  -1  -2   17.02    1.50
 -15   1  -2   14.33    1.72
  -1 -15   3    9.12    1.83
  -1 -15   3    7.37    1.61
 -15   1   3    8.64    0.71
  15  -1   3    6.13    2.55
 -15   1   3   12.32    1.82
 -15   1  -3    6.92    1.59
  -1 -15  -3    7.64    2.34
  15  -1  -3    9.04    0.60
 -15   1   4   15.87    2.12
  15  -1   4   12.22    2.02
 -15   1   4   12.20    0.91
  -1 -15   4   13.02    3.40
  -1 -15  -4   13.05    2.70
 -15   1   5    7.76    2.11
  -1 -15   5   10.36    3.12
  -1 -15   5    9.31    0.40
 -15   1   5    8.73    0.27
 -15   1   5    9.42    0.32
   1  15   5    7.83    1.47
  -1 -15   5    9.69    0.49
  15  -1   5   10.23    2.05
  -1 -15  -5   10.66    1.65
   1  15   6    8.19    1.45
 -15   1   6    9.83    3.18
  -1 -15   6    8.81    2.05
  -1 -15  -6    8.01    1.63
 -15   1   7    1.66    1.35
   1  15   7    1.28    0.96
  -1 -15   7    1.40    1.46
  15  -1  -7    1.47    1.25
  -1 -15  -7   -0.09    1.06
 -15   1   8    8.57    2.07
  -1 -15   8    9.35    2.48
   1  15   8   11.58    1.61
  15  -1  -8    8.92    2.01
  -1 -15  -8    9.75    1.76
  -1 -15   9    4.74    2.20
   1  15   9    3.81    1.34
 -15   1   9    2.27    1.96
  -1 -15  -9    6.35    1.61
  15  -1  -9    5.63    1.73
 -15   1  10   12.49    2.57
  -1 -15  10   12.77    4.22
   1  15  10   11.47    2.85
  15  -1 -10    9.06    3.59
  -1 -15 -10   14.46    2.30
   1  15  11    2.95    1.33
 -15   1  11    3.53    2.89
  -1 -15  11    1.46    1.94
  -1 -15 -11    2.59    1.70
  15  -1 -11    2.15    1.67
 -15   1  12   17.21    3.17
  -1 -15  12   21.67    3.58
   1  15  12   19.96    2.40
  15  -1 -12   20.94    2.89
  -1 -15 -12   20.56    3.04
   1  15  13    0.07    0.97
  -1 -15  13    1.66    2.54
  -1 -15 -13   -0.11    1.34
  15  -1 -13    0.25    1.27
   1  15  14   -0.48    1.16
  -1 -15  14   -2.43    1.97
  -1 -15 -14   -0.01    1.50
  15  -1 -14    0.28    1.39
 -16   1   0    1.52    1.58
  16  -1   0   -0.20    1.15
 -16   1   0    0.36    0.68
  -1 -16   0   -0.40    1.50
  -1 -16   1    8.88    2.45
 -16   1   1    8.22    1.72
 -16   1   1    8.14    1.07
  -1 -16   1    7.82    1.68
  16  -1   1    8.47    1.38
  -1 -16  -1    8.28    2.44
  16  -1  -1    7.25    1.03
 -16   1  -1    6.91    1.32
 -16   1  -1    7.65    1.61
  -1 -16   2    2.71    1.25
 -16   1   2    1.71    0.71
 -16   1   2    2.08    1.40
  16  -1   2    3.06    1.87
  -1 -16   2    4.09    1.38
 -16   1  -2    3.20    1.13
 -16   1  -2    1.70    1.20
  16  -1  -2    3.81    1.01
  -1 -16  -2    2.17    1.89
  16  -1   3   22.22    2.12
  -1 -16   3   20.33    2.47
  -1 -16   3   19.88    2.12
 -16   1   3   22.09    2.39
 -16   1   3   20.22    1.50
 -16   1  -3   19.61    2.08
  -1 -16  -3   19.02    3.05
  16  -1  -3   18.41    0.89
 -16   1   4   61.39    1.81
  -1 -16   4   68.11    6.08
 -16   1   4   64.63    4.05
  -1 -16  -4   64.31    4.98
  -1 -16   5    5.45    0.36
  -1 -16   5    7.98    3.01
 -16   1   5    5.66    0.31
 -16   1   5    5.90    0.39
 -16   1   5    6.35    3.03
  -1 -16   5    5.41    0.44
  -1 -16  -5    5.72    1.53
   1  16   6    0.71    0.83
  -1 -16   6    0.50    1.25
  16  -1   6    0.01    1.21
 -16   1   6   -0.92    1.22
 -16   1  -6    0.23    1.14
  -1 -16  -6    0.82    0.96
  -1 -16   7    4.38    1.88
   1  16   7    2.75    1.17
 -16   1   7    1.91    1.62
  -1 -16  -7    4.16    1.30
  -1 -16   8   33.56    3.56
 -16   1   8   27.41    2.99
   1  16   8   25.38    2.30
  -1 -16  -8   26.93    2.60
  -1 -16   9    4.54    3.16
 -16   1   9    3.80    1.84
   1  16   9    3.27    1.99
  16  -1  -9    1.89    1.61
  -1 -16  -9    2.22    1.53
 -16   1  10    0.16    2.09
  -1 -16  10    0.82    1.45
   1  16  10    0.28    0.94
  -1 -16 -10   -0.25    1.20
  16  -1 -10    0.06    1.19
   1  16  11   -1.07    0.99
  -1 -16  11    0.95    1.52
 -16   1  11    0.64    1.39
  16  -1 -11   -0.08    1.24
  -1 -16 -11   -0.38    1.30
 -16   1  12   -1.76    1.34
   1  16  12    0.45    1.61
  -1 -16  12   -0.20    1.65
  -1 -16 -12   -0.08    1.37
  16  -1 -12    0.57    1.34
  -1 -16  13   -1.91    3.04
   1  16  13    2.01    2.06
  16  -1 -13    1.65    1.55
  -1 -16 -13    0.20    1.71
  -1 -16  14    0.18    2.00
   1  16  14    1.59    1.86
  16  -1 -14   -1.43    1.38
  -1 -16 -14   -0.63    1.53
  17  -1   0    0.60    0.77
 -17   1   0    1.05    0.75
  -1 -17   0    0.28    1.21
  -1 -17   0   -0.57    1.01
 -17   1   0    0.55    1.05
  -1 -17   1    0.15    1.06
 -17   1   1    1.97    1.80
  17  -1   1    1.70    0.87
 -17   1   1   -0.18    0.71
  -1 -17   1    0.87    1.03
 -17   1  -1    1.38    1.08
 -17   1  -1    0.44    0.86
  -1 -17  -1    0.68    1.67
  17  -1  -1    0.61    0.67
  -1 -17   2   19.63    2.17
 -17   1   2   18.61    2.37
 -17   1   2   19.60    1.97
  -1 -17   2   20.23    2.37
  17  -1   2   18.90    2.02
  -1 -17  -2   17.71    3.20
 -17   1  -2   16.66    1.98
 -17   1  -2   18.84    2.12
  17  -1  -2   19.61    1.20
  -1 -17   3    2.02    1.37
 -17   1   3    0.68    0.83
 -17   1   3    1.73    1.30
  -1 -17   3    1.59    1.19
  -1 -17  -3    2.48    1.81
  17  -1  -3    1.00    0.43
 -17   1  -3    1.74    1.81
  -1 -17   4    0.93    1.10
 -17   1   4    0.26    1.18
  -1 -17   4   -0.53    1.25
 -17   1   4    0.76    0.55
  17  -1   4    0.30    1.11
  -1 -17   4    0.16    0.39
  -1 -17  -4    0.97    1.57
  -1 -17   5    0.68    0.24
  -1 -17   5   -1.58    2.13
 -17   1   5    2.95    1.96
  -1 -17   5    0.78    0.32
 -17   1   5    0.79    0.21
 -17   1   5    0.44    0.27
 -17   1  -5    0.81    1.25
  -1 -17  -5    0.86    1.70
   1  17   6    1.17    0.96
  -1 -17   6    0.88    1.53
 -17   1   6    0.85    1.28
  -1 -17  -6    0.39    1.10
 -17   1  -6    1.11    1.34
  -1 -17   7    0.80    1.52
   1  17   7    1.14    0.91
 -17   1   7    0.32    1.28
  -1 -17  -7   -0.37    1.06
 -17   1   8   -0.62    1.31
   1  17   8   -1.35    1.46
  -1 -17   8   -0.79    1.50
  -1 -17  -8    0.51    1.10
 -17   1   9    7.75    3.68
  -1 -17   9    6.37    3.66
   1  17   9    6.44    1.61
  -1 -17  -9    7.42    1.94
 -17   1  10    9.38    2.56
  -1 -17  10   11.42    2.84
   1  17  10   12.59    1.85
  17  -1 -10   -0.24    2.41
  -1 -17 -10   12.88    2.40
   1  17  11    2.78    2.11
  -1 -17  11    3.23    2.12
 -17   1  11    3.42    1.77
  17  -1 -11    0.51    1.75
  -1 -17 -11    0.04    1.83
   1  17  12    0.51    1.22
 -17   1  12    1.26    1.53
  -1 -17  12    1.94    2.95
  17  -1 -12    0.37    1.47
  -1 -17 -12   -0.06    1.59
 -17   1  13   -0.93    1.88
  -1 -17  13    1.52    2.06
   1  17  13   -3.89    1.37
  -1 -17 -13   -0.03    1.81
  17  -1 -13    0.14    1.64
  -1 -18   0   -0.46    0.90
 -18   1   0   -0.24    1.04
  18  -1   0    0.02    0.66
 -18   1   0    0.62    0.94
  -1 -18   0   -0.39    0.85
 -18   1   1    3.20    1.43
  -1 -18   1    3.22    1.36
  18  -1   1    2.40    1.10
  -1 -18   1    3.05    2.20
 -18   1   1    3.31    2.41
  18  -1  -1    2.99    1.34
 -18   1  -1    3.16    1.75
  -1 -18  -1    2.08    1.33
 -18   1  -1    2.67    1.40
 -18   1   2    1.09    1.03
  18  -1   2   -0.01    1.77
 -18   1   2    2.40    1.28
  -1 -18   2    0.33    1.28
  -1 -18   2    0.68    1.11
  18  -1  -2    0.40    0.60
  -1 -18  -2    1.22    1.75
 -18   1  -2    0.62    1.76
 -18   1  -2    1.03    1.72
  -1 -18   3    4.56    1.65
 -18   1   3    4.75    1.90
  -1 -18   3    5.22    1.84
  18  -1   3    5.23    1.56
 -18   1   3    6.23    0.81
  18  -1  -3    5.57    0.95
  -1 -18  -3    3.78    2.43
 -18   1  -3    4.45    1.57
 -18   1  -3    5.19    1.49
  18  -1   4    3.61    1.42
 -18   1   4    1.85    1.49
  -1 -18   4    2.63    1.67
  -1 -18   4    2.79    0.83
  -1 -18   4    2.29    1.31
 -18   1   4    2.02    0.51
 -18   1  -4    2.17    1.33
  -1 -18  -4    0.98    2.02
  -1 -18   5    0.36    0.20
  -1 -18   5    0.47    0.15
  18  -1   5    1.94    1.20
 -18   1   5    0.42    0.28
  -1 -18   5    1.78    2.17
 -18   1   5    0.66    2.01
 -18   1   5    0.57    0.22
 -18   1  -5    0.90    1.15
  -1 -18  -5    0.20    1.68
 -18   1   6   17.28    2.75
  -1 -18   6   23.83    3.09
  -1 -18  -6   18.20    3.50
  -1 -18   7    2.58    1.97
   1  18   7    3.65    1.29
 -18   1   7    2.73    1.77
  -1 -18  -7    4.83    2.30
   1  18   8    0.01    0.99
  -1 -18   8   -1.21    1.57
 -18   1   8   -0.65    1.34
  -1 -18  -8   -0.97    1.85
 -18   1   9    3.39    2.72
  -1 -18   9    0.67    1.84
   1  18   9    0.42    1.86
  -1 -18  -9    1.85    2.30
   1  18  10    2.55    1.37
 -18   1  10    4.05    1.88
  -1 -18  10    1.05    2.24
  -1 -18 -10   -0.04    2.95
 -18   1  11   -0.11    1.59
  -1 -18  11    1.17    1.92
   1  18  11    1.19    1.14
  -1 -18 -11    0.00    2.52
 -18   1  12    0.94    2.11
  -1 -18  12    0.67    2.48
   1  18  12   -0.22    1.04
  -1 -18 -12    0.14    2.21
   1  18  13    1.09    1.91
  -1 -18  13    1.50    1.88
 -18   1  13   -0.90    1.72
  -1 -18 -13    0.10    2.53
  -1 -19   0    5.81    1.56
  -1 -19   0    6.06    1.65
  19  -1   0    5.28    1.79
 -19   1   0    5.78    1.69
 -19   1   0    5.86    1.22
 -19   1   1    8.64    2.09
  19  -1   1   10.22    2.38
 -19   1   1    9.66    1.31
  -1 -19   1   10.09    1.81
  -1 -19   1    9.44    2.02
 -19   1  -1   13.67    1.94
 -19   1  -1    9.10    1.56
  19  -1  -1   11.72    1.22
  -1 -19  -1    8.30    1.83
  -1 -19   2   16.44    2.53
 -19   1   2   18.44    1.46
  -1 -19   2   14.27    3.46
 -19   1   2   20.91    2.44
  19  -1   2   14.82    2.05
 -19   1  -2   15.43    2.01
 -19   1  -2   17.27    2.31
  -1 -19  -2   18.84    2.19
  19  -1  -2   20.71    1.87
  19  -1   3   23.66    2.36
  -1 -19   3   22.03    3.02
  -1 -19   3   21.85    2.39
 -19   1   3   22.68    2.72
 -19   1   3   23.64    2.03
  -1 -19   3   20.80    1.41
 -19   1  -3   21.91    2.32
  19  -1  -3   22.18    1.55
  -1 -19  -3   18.93    2.24
 -19   1  -3   21.99    2.30
  -1 -19   4    0.47    0.95
 -19   1   4    0.82    1.09
  -1 -19   4   -0.58    1.22
 -19   1   4    0.02    0.58
  19  -1   4   -0.51    1.01
  -1 -19   4    0.24    0.37
 -19   1  -4    0.84    0.92
  -1 -19  -4   -0.52    1.48
 -19   1  -4   -1.10    0.96
 -19   1   5    0.75    2.02
  -1 -19   5    0.55    1.07
  -1 -19   5    0.19    0.15
 -19   1   5    0.19    0.17
  -1 -19   5    0.08    0.30
 -19   1   5    0.42    0.22
  -1 -19   5    0.16    2.08
  -1 -19  -5    1.93    1.57
 -19   1   6    1.17    1.47
  -1 -19   6    0.79    1.62
  -1 -19  -6    0.60    1.88
 -19   1   7    1.88    1.81
  -1 -19   7    4.23    2.14
  -1 -19  -7    4.15    2.34
 -19   1   8   -0.55    1.35
  -1 -19   8    2.00    1.57
  -1 -19  -8   -0.63    1.79
   1  19   9    2.83    1.39
 -19   1   9    3.15    2.00
  -1 -19   9    4.47    2.27
  -1 -19  -9   -0.02    2.83
  -1 -19  10    3.54    2.37
   1  19  10    2.45    1.40
 -19   1  10    3.18    1.93
  -1 -19 -10    0.20    2.93
   1  19  11    2.35    2.00
 -19   1  11    1.67    1.80
  -1 -19  11    0.26    2.09
  -1 -19 -11    0.10    2.73
   1  19  12    0.43    1.25
  -1 -19  12    1.29    1.96
 -19   1  12    1.48    2.60
  -1 -19 -12    0.07    1.65
  -1 -20   0    0.26    0.83
 -20   1   0   -0.49    0.68
 -20   1   0    0.30    0.93
  -1 -20   0    0.47    0.91
  20  -1   0   -0.16    0.61
  20  -1   1    5.15    1.27
 -20   1   1    0.25    1.76
 -20   1   1    0.00    1.09
  -1 -20   1    5.78    1.72
 -20   1  -1    3.60    1.28
  20  -1  -1    5.45    1.00
  -1 -20  -1    4.73    1.46
  -1 -20   2    1.99    2.64
  20  -1   2    3.87    1.26
 -20   1   2   -0.01    1.39
  -1 -20   2    4.80    1.42
  -1 -20   2    1.54    0.93
 -20   1   2   -0.21    2.58
 -20   1  -2    3.05    1.19
  20  -1  -2    2.16    0.71
 -20   1  -2    1.78    1.42
  -1 -20  -2    2.59    1.31
 -20   1   3    0.09    1.87
  -1 -20   3    4.97    0.90
  -1 -20   3    6.26    1.64
  -1 -20   3    4.63    2.02
  20  -1   3    4.21    2.46
 -20   1   3    5.57    0.92
  -1 -20  -3    2.39    1.52
  20  -1  -3    5.51    0.67
 -20   1  -3    3.36    1.50
 -20   1   4    3.09    0.64
 -20   1   4    4.51    1.81
  -1 -20   4    1.19    0.98
  -1 -20   4    3.63    1.52
  -1 -20   4    6.32    1.93
  20  -1   4    4.81    1.60
 -20   1  -4    3.62    1.50
 -20   1  -4    2.88    1.51
  -1 -20  -4    4.19    2.35
 -20   1   5   30.31    4.68
 -20   1   5   21.37    0.87
  20  -1   5   21.00    2.95
  -1 -20   5   27.09    2.81
  -1 -20   5   21.91    0.95
 -20   1   5   23.54    0.73
  -1 -20   5   27.09    5.10
 -20   1  -5   23.20    3.76
  -1 -20  -5   31.56    3.83
  -1 -20   6    1.40    1.30
  -1 -20   6    0.24    1.62
 -20   1   6    0.51    1.46
  -1 -20  -6    0.43    1.92
 -20   1   7    7.11    2.17
  -1 -20   7    6.08    2.34
  -1 -20  -7    0.01    2.65
 -20   1   8    3.32    3.01
  -1 -20   8    4.35    2.12
  -1 -20  -8    0.13    1.52
  -1 -20   9    2.20    1.57
 -20   1   9   -1.36    1.38
  -1 -20  -9   -0.06    1.22
  -1 -20  10    1.49    1.95
   1  20  10    0.49    1.21
 -20   1  10    2.16    1.71
  -1 -20 -10   -0.03    1.60
 -20   1  11    1.17    1.43
  -1 -20  11   -0.97    1.67
   1  20  11    0.12    1.01
  -1 -20 -11   -0.16    1.35
  21  -1   0    0.49    0.77
 -21   1   0    0.00    0.86
  -1 -21   1    1.06    1.10
  -1 -21   1   -1.13    1.16
 -21   1   1   -0.16    1.24
  21  -1   1    0.15    0.89
 -21   1   1   -0.03    1.22
  -1 -21   1   -1.11    0.82
  21  -1  -1    1.28    1.04
  -1 -21  -1    1.76    1.10
 -21   1  -1    0.18    1.19
 -21   1  -1    0.66    0.94
  -1 -21  -1    1.08    1.04
  -1 -21   2   17.28    2.74
 -21   1   2   18.97    2.66
 -21   1   2   17.15    1.66
  -1 -21   2   19.27    2.48
  21  -1   2   19.85    3.28
  -1 -21   2   16.46    1.65
  21  -1  -2   18.71    1.36
 -21   1  -2   20.19    2.23
 -21   1  -2   18.67    2.49
  -1 -21  -2   18.04    2.30
  -1 -21   3   12.73    2.55
 -21   1   3   12.43    1.92
  -1 -21   3   12.85    1.24
  21  -1   3   14.43    2.21
 -21   1   3   16.98    2.44
 -21   1  -3    9.69    2.07
  -1 -21  -3   14.76    2.11
 -21   1  -3   14.21    2.25
  21  -1  -3   12.81    0.99
  21  -1   4    3.25    2.73
 -21   1   4    4.50    1.83
 -21   1   4    4.45    1.06
  -1 -21   4    3.23    0.65
  -1 -21   4    0.05    1.98
  -1 -21   4    4.78    1.67
  -1 -21  -4    5.31    1.59
 -21   1  -4   -0.39    1.62
 -21   1  -4    3.21    2.48
  21  -1   5    0.51    1.26
  -1 -21   5   -0.44    1.87
 -21   1   5    1.12    2.07
  -1 -21   5    0.32    1.42
 -21   1  -5   -0.22    1.08
 -21   1  -5    0.83    1.69
  -1 -21  -5    0.05    1.81
  -1 -21   6   -1.27    1.23
 -21   1   6   -0.59    1.52
  -1 -21   6    0.03    1.69
  -1 -21  -6   -0.23    1.97
  -1 -21   7    1.11    1.94
  -1 -21   7    3.32    1.42
 -21   1   7    1.99    1.78
  -1 -21  -7    0.18    1.42
 -21   1  -7   -0.05    1.33
 -21   1   8   -1.34    2.62
  -1 -21   8   -0.57    1.71
  -1 -21  -8   -0.16    1.33
 -21   1   9    4.17    2.26
  -1 -21   9    5.58    2.39
  -1 -21  -9    0.00    1.98
  -1 -21  10    5.78    2.42
 -21   1  10    2.22    2.11
  -1 -21 -10    0.00    1.97
  -1 -22   0    0.97    0.96
  -1 -22   0   -1.43    0.99
 -22   1   0    0.06    1.29
  22  -1   0    0.09    0.67
  22  -1   1    4.59    1.31
  -1 -22   1    4.95    1.63
 -22   1   1    0.00    1.23
  -1 -22   1    4.48    1.27
  -1 -22   1    0.65    1.72
 -22   1   1    0.27    1.86
  -1 -22  -1    4.02    1.77
 -22   1  -1    0.26    1.79
  -1 -22  -1    4.34    1.55
  22  -1  -1    5.18    1.02
 -22   1  -1    4.54    2.24
 -22   1   2   -0.34    2.33
  22  -1   2   12.60    1.95
  -1 -22   2    0.51    2.47
  -1 -22   2    9.28    2.20
  -1 -22   2   12.82    2.21
 -22   1   2   10.08    1.49
 -22   1  -2    9.24    3.15
  22  -1  -2   14.69    1.79
  -1 -22  -2   14.38    2.13
  22  -1   3    3.13    1.50
 -22   1   3    1.36    0.89
 -22   1   3   -0.12    2.66
  -1 -22   3    3.68    1.55
  -1 -22   3    2.45    1.29
  -1 -22  -3    2.41    1.45
 -22   1  -3    3.00    2.22
  22  -1  -3    2.16    0.94
 -22   1  -3    0.16    1.58
  -1 -22   4    1.13    0.90
  22  -1   4    4.15    1.61
 -22   1   4    2.80    1.73
  -1 -22   4    3.56    1.47
  -1 -22   4    0.21    1.91
 -22   1  -4    3.39    1.40
  -1 -22  -4    1.46    1.51
  22  -1   5    0.41    2.27
  -1 -22   5    1.70    1.31
 -22   1   5    2.84    1.51
  -1 -22   5   -0.29    1.71
  -1 -22  -5   -0.20    2.15
 -22   1  -5    0.12    1.25
 -22   1  -5    0.00    1.29
  22  -1   6   19.24    3.15
  -1 -22   6   20.84    2.81
  -1 -22   6   21.05    3.43
 -22   1   6   20.22    3.29
 -22   1  -6   18.46    2.68
  -1 -22  -6    0.10    4.11
 -22   1  -6   23.70    2.70
 -22   1   7   -1.65    1.45
  -1 -22   7    0.66    1.67
  -1 -22   7    1.03    1.21
  -1 -22  -7    0.12    1.16
 -22   1   8    0.51    2.32
  -1 -22   8   -0.78    1.27
  -1 -22   8    0.78    1.56
  -1 -22  -8   -0.09    1.18
 -22   1   9   -1.17    1.70
  -1 -22   9    0.49    1.79
  -1 -22  -9   -0.09    1.43
 -22   1  10   -0.44    2.03
  -1 -22  10    2.37    2.03
  -1 -22 -10   -0.24    1.61
  -1 -23   0   11.88    1.99
  -1 -23   0    0.15    2.25
 -23   1   0   12.50    1.86
 -23   1   0   14.15    2.25
  23  -1   0   11.16    1.60
  -1 -23   0   11.22    1.93
 -23   1   1    0.00    0.98
  -1 -23   1    0.55    1.19
  -1 -23   1    1.53    1.61
 -23   1   1   -0.36    1.33
  23  -1   1    0.86    1.04
 -23   1  -1   -0.03    1.18
 -23   1  -1   -0.04    1.32
  -1 -23  -1    2.36    1.23
  23  -1  -1    0.98    0.78
  -1 -23   2   17.63    1.93
  -1 -23   2   22.00    3.15
  23  -1   2   20.44    3.63
 -23   1   2   18.61    2.97
 -23   1   2   23.82    3.05
  -1 -23  -2   19.79    2.88
  23  -1  -2   20.27    1.52
 -23   1  -2   19.07    2.70
  -1 -23  -2   20.52    2.71
 -23   1  -2   19.94    2.67
  -1 -23   3    0.09    0.58
 -23   1   3   -0.09    1.00
  23  -1   3   -0.05    1.05
 -23   1   3    0.01    2.07
  -1 -23   3   -0.21    1.03
  -1 -23   3   -0.15    1.31
 -23   1  -3    0.98    1.00
 -23   1  -3    0.01    0.96
  -1 -23  -3    0.60    1.06
  23  -1  -3    0.06    0.43
  -1 -23   4   -0.20    1.45
  23  -1   4    1.15    1.20
 -23   1   4   -0.87    1.38
 -23   1  -4   -0.19    0.98
  -1 -23  -4    0.71    0.94
 -23   1  -4    0.30    1.09
  -1 -23   5    0.46    1.67
 -23   1   5    0.84    1.52
  23  -1   5    0.19    1.30
  -1 -23   5    1.48    1.32
 -23   1  -5   -0.03    1.20
 -23   1  -5    0.12    1.67
  -1 -23  -5    0.00    1.28
 -23   1   6   -1.30    1.69
  -1 -23   6   -0.96    1.36
  23  -1   6    0.05    2.36
  -1 -23   6    0.15    3.03
 -23   1  -6    0.09    1.39
 -23   1  -6   -0.05    1.30
  23  -1   7   -0.25    1.26
  -1 -23   7    0.14    1.04
  -1 -23   7    1.36    1.58
 -23   1   7   -0.42    1.33
 -23   1  -7   -0.14    1.07
 -23   1  -7   -0.08    0.99
  -1 -23  -7   -0.03    1.04
  -1 -23   8    0.11    1.43
 -23   1   8    2.57    2.93
  -1 -23   8    1.01    2.09
  -1 -23  -8   -0.07    1.48
 -23   1   9    1.00    2.01
  -1 -23  -9    0.00    1.56
 -24   1   0   -0.05    1.36
  24  -1   0   -0.76    1.41
  -1 -24   0   -1.63    1.06
 -24   1   0    0.02    1.09
  -1 -24   0   -0.05    1.49
  -1 -24   0   -0.09    1.80
  -1 -24   1    1.02    1.09
 -24   1   1    0.71    1.78
  24  -1   1    1.31    1.63
  24  -1  -1    1.46    0.84
 -24   1  -1    0.00    1.29
  -1 -24  -1    0.80    1.16
  -1 -24  -1    0.28    1.32
  -1 -24   2    4.96    1.64
  24  -1   2    4.28    1.48
  -1 -24   2   -0.15    2.03
 -24   1   2    4.93    1.26
 -24   1   2   -0.06    1.97
  -1 -24   2    5.57    1.81
  -1 -24  -2   -0.01    1.79
 -24   1  -2   -0.03    1.59
  -1 -24  -2    0.04    1.86
  24  -1  -2    4.69    0.89
 -24   1  -2   -0.02    1.82
 -24   1   3   -0.06    1.61
  -1 -24   3    0.18    1.84
  24  -1   3    1.35    1.26
  -1 -24   3    0.46    1.29
 -24   1  -3    1.95    1.51
  -1 -24  -3    0.19    1.11
  -1 -24   4    0.11    1.67
  24  -1   4    0.28    1.15
  -1 -24   4    0.40    1.19
 -24   1   4    1.25    1.44
 -24   1  -4   -0.01    1.16
 -24   1  -4   -0.12    1.05
  -1 -24  -4   -0.04    1.25
  -1 -24   5    0.15    1.61
 -24   1   5    0.56    1.35
  24  -1   5   -0.61    1.15
  -1 -24   5    0.23    1.94
 -24   1  -5   -0.10    1.10
  -1 -24  -5   -0.03    1.15
 -24   1  -5   -0.08    0.94
  24  -1   6    0.19    1.76
 -24   1   6    2.50    3.24
  -1 -24   6    0.90    3.77
  -1 -24   6    3.89    1.69
 -24   1  -6   -0.03    2.57
 -24   1  -6   -0.16    2.75
 -24   1   7    0.06    1.57
  24  -1   7    0.18    1.34
  -1 -24   7   -0.96    1.77
  -1 -24   7    0.02    1.42
 -24   1  -7   -0.05    1.13
 -24   1  -7    0.20    1.92
  -1 -24  -7    0.02    1.92
  -1 -25   0    2.74    1.36
 -25   1   0    0.56    1.92
 -25   1   0    0.80    1.37
  25  -1   0    1.03    1.07
 -25   1   1    0.21    1.70
  -1 -25   1    1.95    1.44
  -1 -25   1    1.22    1.17
 -25   1   1    1.42    1.21
  -1 -25   1    0.14    1.74
  25  -1   1    1.04    1.20
  25  -1  -1    1.34    0.88
  -1 -25  -1    2.92    1.26
 -25   1  -1    0.02    2.22
  -1 -25  -1    0.10    1.65
  -1 -25  -1    1.53    2.27
  25  -1   2   -0.15    1.06
  -1 -25   2    0.30    1.15
 -25   1   2   -0.07    1.37
  -1 -25  -2   -2.06    1.70
 -25   1  -2   -0.07    1.95
  25  -1   3   -0.08    1.87
  -1 -25   3   -0.09    1.86
 -25   1   3    0.09    1.59
 -25   1  -3   -0.03    1.28
 -25   1  -3    2.60    2.38
  -1 -25  -3    0.19    1.40
  -1 -25  -3    1.25    1.17
  25  -1   4   -0.62    1.26
  -1 -25   4    1.99    1.25
 -25   1   4   -0.13    1.49
  -1 -25   4    0.18    2.87
 -25   1  -4   -0.12    2.16
  -1 -25  -4   -0.20    1.49
  -1 -25  -4   -0.16    1.35
 -25   1  -4    0.17    1.81
  -1 -25   5   -0.60    1.34
  -1 -25   5   -0.19    1.64
  25  -1   5    0.20    1.13
 -25   1   5    0.21    1.56
 -25   1  -5   -0.17    1.94
  -1 -25  -5    0.11    1.20
 -25   1  -5    0.00    0.97
  -1 -25   6   -0.46    1.37
  -1 -25   6   -0.22    1.80
 -25   1   6    1.76    2.60
  25  -1   6   -0.04    1.29
  -1 -25  -6   -0.11    2.00
 -25   1  -6    0.10    2.00
 -25   1  -6   -0.08    1.22
 -26   1   0    0.92    1.11
  -1 -26   0   -0.73    1.06
  26  -1   0    0.32    1.31
  26  -1   1   -1.18    1.76
 -26   1   1    0.27    1.65
  -1 -26   1   -1.00    1.64
  -1 -26   1    0.27    1.87
  -1 -26  -1   -0.36    1.25
 -26   1  -1   -2.76    1.40
  -1 -26  -1   -1.32    1.42
 -26   1  -1   -0.12    1.66
  -1 -26  -1    0.28    1.67
  26  -1   2    0.19    1.83
 -26   1  -2    0.50    1.40
  -1 -26  -2    0.46    1.18
  -1 -26   3    0.41    1.61
  -1 -26   3   -0.76    1.35
 -26   1   3    0.15    1.63
  26  -1   3    0.45    1.06
 -26   1  -3    0.00    1.09
 -26   1  -3   -0.90    1.30
  -1 -26  -3    0.11    1.23
  26  -1   4    0.00    2.49
  -1 -26   4    0.65    2.39
  -1 -26   4    2.18    3.03
 -26   1   4    0.03    3.59
  -1 -26  -4   -0.11    1.78
  -1 -26  -4    0.98    1.66
 -26   1  -4    4.14    1.81
  -2   0   2  526.95   12.62
   0   2   2  527.83   11.59
  -2   0   2  535.99   10.82
   2   0   2  501.14   11.93
   0  -2   2  520.28   11.97
  -2   0  -2  511.02   12.04
   0   2  -2  500.12   11.40
   0   2  -2  422.76    8.37
   0  -2  -2  523.75   12.12
   2   0  -2  505.73   11.41
   0   2   3    9.02    0.78
   0  -2   3    7.72    0.84
   2   0   3   11.19    1.56
  -2   0   3    9.21    0.85
  -2   0   3    7.71    0.84
   0   2  -3    7.42    0.80
   2   0  -3    8.34    1.26
   2   0  -3    9.25    0.51
  -2   0  -3   11.37    1.54
   0  -2  -3   10.50    1.23
   0   2  -3    8.85    0.47
  -2   0   4   13.74    1.06
   2   0   4   13.13    1.84
  -2   0   4   14.51    0.78
   0   2   4   14.94    0.96
   0  -2   4   14.12    1.08
   0   2  -4   14.32    1.51
   2   0  -4   14.02    0.99
   2   0  -4   13.75    1.07
  -2   0  -4   13.33    1.14
   0   2  -4   13.47    1.04
   0  -2  -4   14.74    0.96
   0  -2   5    7.58    0.95
   2   0   5    6.76    1.01
   0   2   5    8.58    1.28
  -2   0   5    7.64    1.07
   0   2  -5    7.79    0.88
   2   0  -5    8.40    0.85
   0   2  -5    9.23    0.98
   0  -2  -5    7.54    1.28
  -2   0  -5    6.42    0.94
   2   0  -5    7.91    0.64
   2   0   6   26.76    1.67
   0   2   6   25.83    1.39
  -2   0   6   26.74    1.23
   0  -2   6   29.11    1.58
   2   0  -6   28.09    1.20
  -2   0  -6   25.66    1.60
   2   0  -6   26.40    1.41
   0   2  -6   28.43    1.51
   0   2  -6   28.11    1.69
   0  -2  -6   29.44    2.11
   0   2   7   59.22    2.34
   0  -2   7   59.75    2.62
  -2   0   7   60.11    2.20
   2   0   7   59.46    2.71
   0   2  -7   61.15    2.50
   2   0  -7   58.37    2.42
   0   2  -7   60.05    2.10
   0  -2  -7   58.64    3.20
  -2   0  -7   60.08    2.67
   2   0  -7   56.14    2.79
   2   0   8    2.40    1.02
   0   2   8    2.49    0.86
   0  -2   8    2.75    1.57
  -2   0   8    1.81    0.81
   0  -2  -8    2.28    0.83
   0   2  -8    0.93    0.73
   2   0  -8    1.60    0.76
   0   2  -8    1.81    0.93
   2   0  -8    2.57    0.90
  -2   0  -8    2.38    1.02
   2   0   9  205.36    7.62
  -2   0   9  203.12    6.67
   0  -2   9  207.50    7.41
   0   2   9  209.17    8.57
  -2   0  -9  209.61    7.37
   0   2  -9  210.14    8.63
   2   0  -9  210.13    6.70
   2   0  -9  211.61    7.06
   0  -2  -9  205.03    6.93
   0   2  -9  220.97    8.10
   0  -2  10    0.61    1.09
   0   2  10    1.77    1.52
   2   0  10    0.94    1.16
  -2   0  10    1.22    0.92
   2   0 -10    0.49    0.83
   0   2 -10    1.10    1.52
   0  -2 -10    1.13    1.12
  -2   0 -10    1.18    1.03
   0   2 -10    1.67    0.85
   2   0  11   35.27    2.96
  -2   0  11   36.00    2.47
   0   2  11   35.14    2.49
   0  -2  11   34.20    2.88
   0   2 -11   38.33    2.28
   2   0 -11   33.08    3.15
   2   0 -11   32.97    2.52
  -2   0 -11   31.43    3.82
   0  -2 -11   33.80    2.39
   0   2 -11   36.78    2.46
   0  -2  12   19.57    2.32
   2   0  12   18.70    2.34
  -2   0  12   18.55    1.96
   0   2  12   18.24    2.05
  -2   0 -12   15.81    2.03
   0   2 -12   15.66    1.93
   0  -2 -12   18.20    2.25
   2   0 -12   18.57    2.04
  -2   0 -12   19.88    2.13
   2   0 -12   20.33    1.74
   0  -2 -12   19.41    2.91
   0  -2  13    6.89    2.75
  -2   0  13    5.99    1.58
   2   0  13    7.15    1.79
   0   2  13    7.57    2.51
  -2   0 -13    7.18    2.51
   2   0 -13    8.14    1.37
   0   2 -13    8.18    2.38
   0  -2 -13    5.76    1.50
   0  -2  14    2.28    1.48
   0   2  14    1.23    1.37
   2   0  14    1.85    1.52
  -2   0  14    2.08    1.29
  -2   0 -14    1.08    1.31
   0   2 -14    3.27    1.22
   2   0 -14    2.20    1.75
   0  -2 -14    1.42    1.91
  -2   0  15    0.57    1.20
   0   2  15    0.50    1.22
   0  -2  15   -0.83    2.28
   2   0  15    2.07    1.34
   2   0 -15    0.67    1.04
  -2   0 -15    2.99    1.23
   0  -2 -15    0.87    1.17
   0   2 -15   -0.48    1.17
   2   0  16    0.39    1.50
  -2   0  16   -0.11    1.23
   0   2  16    0.28    2.04
   0  -2  16   -1.18    1.48
   0  -2 -16    2.08    1.79
   2   0 -16    0.55    1.80
  -2   0 -16    2.49    1.34
   0   2 -16    3.48    1.98
  -2   0  17    0.09    2.05
   0  -2  17    2.04    2.48
   0   2  17   -1.22    1.35
   2   0  17   -0.72    2.34
   0  -2 -17    0.48    1.19
   0   2 -17   -1.27    1.20
   0   2 -17   -0.04    1.11
   2   0 -17   -0.66    1.09
   2   0 -17    0.03    1.21
  -2   0 -17   -1.66    1.26
   1  -2   2  643.05   15.82
  -1   2   2  665.00   15.09
  -2  -1   2  654.14   15.71
   2   1   2  629.72   15.57
  -2  -1   2  654.04   15.00
   2   1  -2  619.21   14.18
  -2  -1  -2  646.67   15.95
   2   1  -2  625.57   13.73
   1  -2  -2  624.36   13.90
  -1   2  -2  638.73   15.54
  -2  -1   3    1.21    0.44
   1  -2   3    2.04    0.68
   2   1   3    2.25    0.73
  -2  -1   3    1.67    0.89
  -1   2   3    2.05    0.79
  -2  -1  -3    2.30    0.70
  -1   2  -3    2.58    0.67
   2   1  -3    1.63    0.39
   1  -2  -3    2.01    0.45
   2   1  -3    2.09    0.49
   1  -2   4  203.65    5.57
  -2  -1   4  205.73    4.86
  -2  -1   4  211.90    6.00
   2   1   4  200.79    5.49
  -1   2   4  199.64    4.71
   1  -2  -4  212.36    4.95
  -2  -1  -4  203.71    6.55
   2   1  -4  206.18    4.70
   2   1  -4  208.14    4.99
  -1   2  -4  207.29    6.42
  -1   2   5   23.93    1.58
   1  -2   5   21.97    1.42
  -2  -1   5   23.45    1.58
   2   1   5   21.96    1.40
   2   1  -5   22.63    1.00
  -2  -1  -5   21.95    1.36
  -1   2  -5   21.03    1.32
   1  -2  -5   21.67    1.05
   2   1  -5   22.44    1.12
   2   1   6   59.94    2.43
  -1   2   6   57.05    1.95
   1  -2   6   59.28    2.47
  -2  -1   6   58.74    2.71
  -2  -1  -6   57.30    2.47
  -1   2  -6   58.17    2.31
   1  -2  -6   56.43    1.97
   2   1  -6   56.20    2.00
   1  -2  -6   57.00    2.46
   2   1  -6   58.58    1.96
   1  -2   7  205.55    7.91
  -2  -1   7  202.30    5.75
  -1   2   7  198.20    5.64
   2   1   7  200.95    6.45
   2   1  -7  203.96    5.77
  -2  -1  -7  199.54    6.28
   1  -2  -7  202.44    6.45
  -1   2  -7  201.04    7.39
   2   1  -7  195.83    5.52
   1  -2  -7  196.14    5.60
   2   1   8   68.19    3.18
  -2  -1   8   70.30    2.83
   1  -2   8   70.62    3.29
  -1   2   8   68.57    2.71
   2   1  -8   71.12    2.72
  -2  -1  -8   69.11    3.14
   1  -2  -8   72.27    3.33
   2   1  -8   69.37    2.75
  -1   2  -8   71.72    3.16
   1  -2  -8   70.66    2.71
  -1   2  -8   72.26    2.59
   1  -2   9  134.53    7.23
  -1   2   9  128.37    4.59
   2   1   9  131.06    7.21
  -2  -1   9  131.56    4.84
   2   1  -9  134.01    4.70
  -1   2  -9  134.44    5.17
  -1   2  -9  139.19    4.60
   1  -2  -9  136.26    4.77
  -2  -1  -9  131.69    5.25
   2   1  -9  135.52    4.80
   2   1  10    1.33    1.09
  -2  -1  10    0.47    0.93
  -1   2  10    0.58    1.40
   1  -2  10    1.97    1.09
   1  -2 -10   -0.24    1.09
  -1   2 -10    1.20    0.96
   2   1 -10    0.27    0.78
   1  -2 -10    1.28    0.79
  -1   2 -10    0.92    0.79
   2   1 -10    0.05    0.86
   1  -2  11    1.32    1.99
  -2  -1  11    0.19    1.01
   2   1  11    2.17    1.18
  -1   2  11    2.04    1.00
  -1   2 -11    0.00    0.89
  -1   2 -11    1.53    1.05
   2   1 -11   -0.04    0.96
   2   1 -11    1.06    0.88
  -2  -1 -11    0.92    1.06
   1  -2 -11    0.57    1.51
   1  -2  12    0.26    1.04
  -1   2  12    0.08    0.85
   2   1  12    1.15    1.03
  -2  -1  12    0.83    1.40
   2   1 -12   -0.95    1.30
   2   1 -12    1.32    1.14
   1  -2 -12    0.02    0.75
  -1   2 -12   -0.54    0.88
  -1   2  13    1.99    1.72
  -2  -1  13    2.71    1.13
   1  -2  13    0.87    2.06
  -1   2 -13   -0.02    1.00
  -1   2 -13    1.12    1.11
   2   1 -13   -0.04    1.05
   1  -2 -13    0.89    1.57
   2   1 -13    1.07    0.95
  -2  -1 -13    2.07    1.08
   1  -2 -13   -0.03    1.24
  -1   2  14    0.54    1.07
   1  -2  14   -0.44    1.29
  -2  -1  14   -0.44    1.78
   2   1  14    0.81    1.19
   1  -2 -14    0.03    0.99
   2   1 -14    1.27    0.93
  -2  -1 -14    1.04    1.14
  -1   2 -14    0.65    1.05
   1  -2  15    1.84    2.38
  -2  -1  15    2.26    1.29
   2   1  15    0.30    2.23
  -1   2  15    2.32    1.22
  -2  -1 -15    0.00    1.27
   1  -2 -15    0.50    1.75
   2   1 -15    0.04    1.66
   2   1 -15    0.89    1.74
  -1   2 -15    0.38    1.18
   2   1  16    0.50    1.45
  -2  -1  16    0.73    2.07
   1  -2  16    0.38    1.56
  -1   2  16    0.51    2.00
  -1   2 -16    1.76    1.26
   2   1 -16    0.08    1.17
  -2  -1 -16    1.84    1.34
   2   1 -16    0.34    1.14
   1  -2 -16    1.17    1.14
   1  -2  17    5.95    3.04
  -2  -1  17    0.08    1.75
  -1   2  17   -0.12    1.64
   2   1  17    5.39    1.85
   2   1 -17   -0.09    1.44
  -2  -1 -17    2.70    1.51
   2   1 -17    4.09    1.42
   1  -2 -17    3.71    2.26
  -1   2 -17    2.75    2.49
  -2   2   1  228.48    4.85
   2   2   1  227.80    4.78
  -2  -2   1  232.48    4.42
   2  -2   1  230.71    4.88
   2  -2  -1  222.66    5.26
  -2  -2  -1  226.32    4.74
  -2   2  -1  223.63    3.83
  -2   2  -1  240.03    5.57
  -2   2   2 1142.72   28.07
   2  -2   2 1127.63   31.51
  -2   2   2 1143.43   32.95
   2   2   2 1146.38   32.87
  -2  -2   2 1135.38   29.05
  -2  -2   2 1157.10   30.25
   2  -2  -2 1148.33   31.95
  -2  -2  -2 1136.12   31.30
   2   2  -2 1178.47   29.87
  -2   2  -2 1136.51   31.45
  -2  -2   3  186.41    4.33
   2   2   3  197.73    5.28
   2  -2   3  195.83    5.33
  -2  -2   3  190.70    4.27
  -2   2   3  196.02    3.99
   2   2  -3  198.57    4.39
   2  -2  -3  199.78    4.00
   2  -2  -3  199.61    5.35
  -2   2  -3  194.30    5.16
  -2  -2  -3  196.57    5.26
   2   2  -3  192.31    4.08
  -2   2   4    6.49    0.53
   2  -2   4    6.72    0.96
   2   2   4    5.98    0.92
  -2  -2   4    6.26    0.65
  -2  -2   4    6.67    0.70
   2   2  -4    6.55    0.89
  -2  -2  -4    6.73    0.91
  -2   2  -4    6.35    0.90
   2   2  -4    7.19    1.01
   2  -2  -4    6.09    0.52
   2  -2  -4    7.01    0.96
  -2  -2   5    1.33    0.56
  -2  -2   5    2.38    0.60
  -2   2   5    1.72    0.75
   2   2   5    2.44    0.74
   2  -2   5    1.53    0.82
  -2  -2  -5    1.55    0.76
   2   2  -5    2.99    0.79
   2   2  -5    1.79    0.83
   2  -2  -5    2.42    0.78
  -2   2  -5    2.69    0.73
   2  -2  -5    2.39    0.46
   2  -2   6    1.56    0.83
  -2  -2   6    1.56    0.62
   2   2   6    1.25    1.19
  -2   2   6    0.71    0.49
   2   2  -6    1.51    0.55
  -2   2  -6    1.26    0.74
  -2  -2  -6    1.07    0.75
   2   2  -6    1.45    0.50
   2  -2  -6    0.96    0.48
   2  -2  -6    1.34    0.78
   2   2   7    1.81    1.35
   2  -2   7    2.08    0.89
  -2  -2   7    0.97    0.70
  -2   2   7    1.47    0.58
  -2  -2  -7    0.67    1.34
  -2   2  -7    1.66    0.82
   2   2  -7    1.53    0.59
   2   2  -7    1.14    0.62
   2  -2  -7    0.99    0.87
   2  -2  -7    0.76    0.56
   2   2   8   22.83    2.64
   2  -2   8   18.87    1.93
  -2  -2   8   20.06    1.53
  -2   2   8   17.96    1.30
  -2  -2  -8   21.02    1.71
   2  -2  -8   21.76    1.84
   2   2  -8   18.21    1.92
   2   2  -8   17.40    1.35
  -2   2  -8   19.15    1.73
   2  -2  -8   18.02    1.91
  -2   2   9   25.33    1.74
  -2  -2   9   28.76    2.05
   2   2   9   26.21    3.51
   2  -2   9   27.64    2.40
   2  -2  -9   26.84    1.67
   2   2  -9   27.27    2.57
  -2   2  -9   26.16    2.19
  -2  -2  -9   29.07    2.17
   2   2  -9   26.78    1.79
   2   2  10   84.22    4.13
  -2  -2  10   88.19    4.01
  -2   2  10   90.34    4.84
   2  -2  10   89.22    4.55
  -2   2 -10   93.29    3.66
   2  -2 -10   90.99    4.44
  -2   2 -10   89.37    4.22
   2   2 -10   90.58    3.52
   2  -2 -10   87.49    4.73
   2   2 -10   90.15    3.67
  -2   2  11    5.38    1.21
   2  -2  11    5.58    1.72
   2   2  11    6.84    1.56
  -2  -2  11    6.67    1.40
  -2  -2 -11    5.51    1.42
   2  -2 -11    5.34    1.09
   2  -2 -11    5.06    1.58
   2   2 -11    0.00    1.18
   2   2 -11    4.00    1.18
  -2   2 -11    6.39    1.46
   2   2  12   -0.12    0.95
  -2  -2  12   -0.83    1.40
   2  -2  12   -0.47    1.04
  -2   2  12    0.78    0.75
   2  -2 -12    1.21    1.15
   2   2 -12    0.00    0.74
  -2   2 -12    0.41    0.90
  -2   2 -12   -0.03    0.78
   2   2 -12    0.00    0.73
   2  -2  13   -0.56    1.06
  -2   2  13    0.14    1.26
  -2  -2  13    0.45    0.93
   2   2 -13   -0.72    1.23
   2  -2 -13   -0.16    0.74
  -2   2 -13    0.07    1.38
  -2  -2  14   13.10    2.07
   2  -2  14   12.87    2.35
  -2   2  14    8.95    1.75
   2   2  14   11.41    2.05
   2  -2 -14   11.14    2.52
   2   2 -14   11.84    1.72
  -2   2 -14   14.39    1.75
  -2   2 -14    9.62    1.93
  -2  -2 -14    9.67    1.93
   2  -2 -14    0.03    2.17
   2   2 -14   10.30    1.69
  -2   2  15    0.70    1.03
   2  -2  15    0.00    2.14
  -2  -2  15    0.60    1.24
   2   2  15    1.26    1.27
   2  -2 -15   -0.06    0.95
   2   2 -15    0.52    0.98
  -2   2 -15    0.09    1.12
  -2  -2 -15    0.35    1.22
   2   2 -15    0.86    0.97
   2   2  16   -0.54    1.33
  -2  -2  16    0.75    1.28
  -2   2  16    0.29    1.70
   2  -2  16    2.96    1.51
   2   2 -16    0.17    1.08
  -2   2 -16    0.05    1.09
  -2  -2 -16    0.08    1.15
  -2   2 -16    1.15    1.15
   2   2 -16   -0.04    1.67
   2  -2 -16    0.24    1.62
   2   2  17   -2.94    1.53
  -2  -2  17    0.11    1.56
  -2   2  17    0.00    1.32
   2   2 -17   -0.08    1.19
   2  -2 -17    1.92    1.15
   2   2 -17    2.63    1.22
  -2   2 -17    1.12    1.35
  -2  -2 -17    2.59    1.35
  -3   2   0   -0.22    0.33
   2   3   0    0.18    0.26
   3  -2   0    0.04    0.20
   3  -2   0    0.20    0.23
  -3   2   0    0.15    0.24
  -2  -3   0    0.30    0.43
  -2  -3   1  184.86    3.79
   2   3   1  185.83    4.09
   3  -2   1  186.49    4.20
  -3   2   1  188.90    4.88
  -3   2   1  188.01    3.04
  -3   2  -1  182.71    4.08
   3  -2  -1  187.66    4.16
  -2  -3  -1  185.88    4.11
   3  -2  -1  190.71    3.16
  -2  -3   2 1005.96   24.65
  -3   2   2 1021.81   29.49
  -2  -3   2  986.84   25.98
   3  -2   2  997.50   27.85
   2   3   2 1005.11   27.44
  -3   2   2  976.63   21.94
  -2  -3  -2  993.83   27.20
   3  -2  -2  986.50   27.24
  -3   2  -2 1010.74   27.92
  -2  -3   3  185.54    5.26
  -3   2   3  179.18    5.00
  -2  -3   3  185.84    4.44
   3  -2   3  180.76    5.16
  -3   2   3  185.61    3.62
   2   3   3  181.76    4.93
   2   3  -3  182.89    4.24
   3  -2  -3  181.95    4.99
  -2  -3  -3  176.79    4.88
   2   3  -3  178.50    3.58
  -3   2  -3  180.72    5.05
  -3   2   4   10.71    1.16
  -2  -3   4   12.09    0.93
   3  -2   4    9.83    1.25
  -2  -3   4   11.28    0.67
   2   3   4   12.72    1.11
  -3   2   4   10.86    0.76
   3  -2  -4   10.42    1.11
   2   3  -4   11.36    0.89
  -3   2  -4   11.11    1.14
  -2  -3  -4   12.57    1.10
   3  -2  -4   12.22    0.76
   2   3  -4   12.04    0.82
  -3   2   5    3.71    0.68
   3  -2   5    4.04    0.98
  -2  -3   5    3.18    0.55
   2   3   5    4.33    0.86
  -2  -3   5    4.87    1.16
   3  -2  -5    4.66    0.88
   3  -2  -5    3.70    0.69
   2   3  -5    3.86    0.46
  -2  -3  -5    4.27    1.39
   2   3  -5    3.61    0.63
  -3   2  -5    3.61    0.90
  -2  -3   6  360.97   10.02
  -3   2   6  349.86    8.67
   2   3   6  345.04   10.07
   3  -2   6  347.97   10.73
   3  -2  -6  354.23   10.43
  -3   2  -6  356.28   10.59
   3  -2  -6  348.85    8.69
   2   3  -6  368.08    9.82
  -2  -3  -6  370.78   12.14
   2   3  -6  347.49    8.66
  -2  -3   7    2.93    0.85
   3  -2   7    3.39    1.10
   2   3   7    2.96    0.96
  -3   2   7    3.61    0.61
  -3   2  -7    3.47    1.68
   3  -2  -7    2.72    0.59
   2   3  -7    3.23    0.96
   3  -2  -7    3.30    0.99
  -2  -3  -7    3.64    1.54
   2   3  -7    2.63    0.75
  -3   2   8    0.51    0.53
   3  -2   8    1.43    0.94
   2   3   8   -0.07    1.24
  -2  -3   8   -0.26    0.72
  -2  -3  -8    0.19    0.77
   2   3  -8    1.21    0.99
   2   3  -8    0.45    0.84
   3  -2  -8    0.07    0.82
  -3   2  -8    0.97    0.82
   3  -2  -8    0.58    0.50
  -2  -3   9   14.79    1.61
   3  -2   9   12.42    1.94
  -3   2   9   12.21    1.88
   2   3   9   13.21    2.63
   2   3  -9   14.68    2.11
   3  -2  -9   14.56    2.79
  -3   2  -9   12.92    1.72
   2   3  -9   12.47    1.82
   3  -2  -9   12.13    1.13
  -2  -3  -9   12.37    1.64
  -2  -3  10   36.28    3.87
  -3   2  10   35.63    3.03
   3  -2  10   33.69    4.81
   2   3  10   34.30    2.66
   2   3 -10   36.82    3.08
  -3   2 -10   31.95    2.88
   2   3 -10   33.85    3.27
   3  -2 -10   42.70    4.33
   3  -2 -10   33.06    1.98
  -2  -3  11    6.31    1.52
   2   3  11    5.50    1.59
   3  -2  11    6.29    1.90
  -3   2  11    6.61    1.19
   2   3 -11    6.04    1.27
   3  -2 -11    5.92    1.11
   2   3 -11    6.14    1.81
   3  -2 -11    6.04    1.64
  -3   2 -11    6.30    2.46
  -3   2  12   13.82    1.57
   2   3  12   13.87    2.07
  -2  -3  12   15.29    2.05
   3  -2  12   15.03    3.66
   3  -2 -12   12.94    1.51
   2   3 -12   13.97    1.69
   3  -2 -12   16.62    2.09
  -3   2 -12   14.28    2.02
  -3   2 -12   15.26    1.75
  -2  -3 -12   14.68    1.96
   2   3 -12   13.67    1.52
   2   3  13    0.75    0.92
  -2  -3  13    0.47    1.52
   3  -2  13    0.11    1.14
  -3   2  13   -0.73    1.14
   2   3 -13    0.40    0.77
  -3   2 -13    1.08    0.93
   3  -2 -13   -0.70    1.09
   2   3 -13   -0.51    0.69
   2   3  14    0.57    1.88
   3  -2  14    1.57    1.43
  -2  -3  14    0.76    1.25
  -3   2  14    0.06    0.94
   2   3 -14    0.31    0.92
  -2  -3 -14   -0.06    1.15
  -3   2 -14    0.65    1.15
   2   3 -14    1.31    0.97
   3  -2 -14    0.41    0.89
   2   3  15    1.17    1.35
   3  -2  15    1.90    1.57
  -3   2  15    0.06    1.07
  -2  -3  15    0.97    2.20
  -2  -3 -15    1.21    1.27
  -3   2 -15    3.00    1.23
   2   3 -15    0.05    1.53
   3  -2 -15    0.28    1.48
   2   3 -15   -0.54    1.75
   3  -2 -15   -0.08    1.38
   2   3  16    1.35    1.43
  -2  -3  16    1.79    1.49
  -3   2  16   -0.06    1.18
   3  -2  16    1.80    1.69
   2   3 -16    1.88    1.18
   2   3 -16   -0.02    1.09
   3  -2 -16    0.04    1.01
  -3   2 -16    2.99    2.11
  -2  -3 -16    3.08    2.04
  -3   2  17    0.06    1.22
   2   3  17   -0.04    1.48
  -2  -3  17   -0.79    1.60
   3  -2  17    2.98    2.75
  -2  -3 -17   -0.03    1.48
  -3   2 -17    0.77    1.27
   2   3 -17    4.29    1.24
   3  -2 -17    0.06    1.70
   3  -2 -17    0.81    1.42
   2   3 -17    0.09    1.11
  -4   2   0  885.86   23.21
   4  -2   0  904.97   23.14
   2   4   0  882.53   22.62
   4  -2   0  858.28   22.58
  -2  -4   0  863.05   22.02
  -4   2   0  912.89   23.17
  -2  -4   1  140.58    3.25
  -4   2   1  135.95    3.43
   4  -2   1  135.03    4.17
   2   4   1  141.50    3.47
  -4   2   1  141.33    2.65
   4  -2  -1  144.24    2.75
  -2  -4  -1  137.55    3.44
  -4   2  -1  137.19    3.37
   4  -2  -1  135.69    3.35
  -2  -4   2  137.95    3.43
  -4   2   2  136.89    3.84
   2   4   2  132.69    3.65
   4  -2   2  136.83    3.95
   4  -2  -2  136.21    3.77
  -2  -4  -2  140.62    5.03
  -4   2  -2  138.50    3.87
   2   4   3  214.80    5.71
  -2  -4   3  221.71    4.47
  -2  -4   3  226.88    5.63
  -4   2   3  227.76    3.71
  -4   2   3  219.76    6.03
   4  -2   3  225.12    6.40
   4  -2  -3  210.77    5.75
  -2  -4  -3  218.31    5.83
  -4   2  -3  222.40    6.14
   2   4  -3  221.68    5.33
  -4   2   4    0.64    0.32
  -2  -4   4    0.39    0.58
  -2  -4   4    1.09    0.53
  -4   2   4    1.63    0.70
   4  -2   4    0.46    0.75
   2   4   4    1.47    0.62
   2   4  -4    0.67    0.49
   2   4  -4    0.84    0.25
  -4   2  -4    0.02    0.72
  -2  -4  -4    0.06    0.65
   4  -2  -4    1.00    0.17
   4  -2  -4    0.80    0.65
  -4   2   5   95.62    2.08
  -4   2   5   97.43    3.46
   2   4   5   98.99    3.25
  -2  -4   5   97.93    2.39
   4  -2   5  100.67    3.70
  -2  -4   5  102.11    4.00
   4  -2  -5  101.06    2.49
  -4   2  -5   97.84    4.59
   4  -2  -5   94.48    3.27
  -2  -4  -5  100.46    3.39
   2   4  -5   97.73    2.90
   2   4  -5   93.48    2.09
  -2  -4   6    2.60    0.78
   2   4   6    2.77    0.88
   4  -2   6    1.92    1.04
  -4   2   6    2.59    0.69
   2   4  -6    2.04    0.67
  -2  -4  -6    2.13    1.47
   4  -2  -6    1.57    0.63
   2   4  -6    2.10    0.71
   4  -2  -6    2.61    0.91
  -4   2  -6    2.08    0.95
  -2  -4   7    1.43    0.80
   2   4   7    1.87    0.87
   4  -2   7    1.69    1.02
  -4   2   7    1.62    0.47
   4  -2  -7    1.42    0.44
   2   4  -7    1.67    0.46
   2   4  -7    1.56    0.70
   4  -2  -7    0.15    0.86
  -4   2  -7    2.43    0.94
  -2  -4  -7    1.97    1.41
   2   4   8    5.23    1.19
  -2  -4   8    5.04    1.14
  -4   2   8    5.40    1.14
   4  -2   8    5.94    1.45
   4  -2  -8    4.95    0.69
   4  -2  -8    6.76    1.22
  -4   2  -8    6.20    1.27
   2   4  -8    5.04    1.58
  -2  -4  -8    4.29    1.95
   2   4  -8    6.54    1.05
   2   4   9   18.87    2.80
   4  -2   9   18.94    3.40
  -4   2   9   16.72    1.85
  -2  -4   9   20.14    1.81
  -4   2  -9   14.13    1.97
  -2  -4  -9   17.93    1.76
   2   4  -9   16.28    1.19
   4  -2  -9   16.10    1.14
   2   4  -9   16.52    1.55
   4  -2  -9   16.33    1.87
  -4   2  10   58.42    2.52
  -2  -4  10   63.26    3.44
   4  -2  10   62.86    4.02
  -2  -4 -10   60.77    3.28
  -4   2 -10   60.77    3.57
   2   4 -10   63.91    2.48
   4  -2 -10   61.45    2.54
   4  -2 -10   59.05    3.63
   2   4 -10   58.25    3.05
   4  -2  11   -1.42    1.18
  -4   2  11   -0.30    0.64
  -2  -4  11   -0.02    1.52
   2   4  11   -1.46    1.53
   4  -2 -11   -0.76    0.97
   2   4 -11    0.51    0.62
   2   4 -11    0.07    0.78
   4  -2 -11    0.03    1.53
  -4   2 -11   -0.63    1.00
  -2  -4  12   11.95    1.92
  -4   2  12    9.51    1.35
   4  -2  12    9.98    3.45
   2   4  12   12.45    1.87
   4  -2 -12    9.54    1.28
   2   4 -12   10.65    2.49
   2   4 -12   12.46    1.98
  -4   2 -12    7.65    1.94
  -2  -4 -12    9.35    2.80
  -2  -4  13   -0.16    0.95
  -4   2  13    0.47    0.65
   2   4  13    0.01    0.87
   4  -2  13    1.59    1.14
  -4   2 -13   -0.01    0.91
  -4   2 -13   -0.03    0.78
  -2  -4 -13   -0.98    0.88
   2   4 -13   -0.34    0.61
   4  -2 -13   -0.18    0.65
   2   4 -13   -0.20    1.16
   4  -2 -13   -0.02    0.92
  -2  -4  14    3.79    2.46
   4  -2  14    3.43    2.78
   2   4  14    3.31    1.47
  -4   2  14    0.03    1.05
  -4   2 -14    1.92    1.39
   2   4 -14    3.38    1.21
  -2  -4 -14    1.72    1.36
   4  -2 -14    3.29    1.02
   2   4 -14   -0.03    0.97
   2   4  15   -0.29    1.07
   4  -2  15    0.15    1.33
  -2  -4  15    1.81    1.16
  -4   2  15    0.06    1.32
  -2  -4 -15   -0.26    1.01
   2   4 -15   -0.04    0.74
   4  -2 -15   -0.22    0.73
  -4   2 -15   -0.51    1.04
   4  -2 -15   -0.31    1.74
   2   4 -15    0.86    0.93
  -2  -4  16    1.73    2.56
   4  -2  16    3.40    1.75
  -4   2  16   -0.10    1.12
   2   4  16   -1.06    2.18
  -2  -4 -16   -0.23    1.39
   4  -2 -16    0.46    1.48
   2   4 -16   -0.01    1.55
   4  -2 -16    1.10    1.41
   2   4 -16    3.70    1.20
  -4   2 -16    0.04    1.32
  -4   2  17   -0.05    1.14
   4  -2  17    0.94    1.84
  -2  -4  17    3.31    1.74
   2   4  17    2.65    1.57
   2   4 -17    2.28    1.99
  -2  -4 -17   -1.57    2.62
   4  -2 -17    1.35    1.50
   2   4 -17    0.03    1.05
   4  -2 -17    0.21    1.07
  -4   2 -17    3.78    2.08
   5  -2   0   -0.22    0.32
   2   5   0    0.33    0.35
   5  -2   0   -0.05    0.26
  -2  -5   0    0.49    0.60
  -5   2   0   -0.25    0.31
  -5   2   0    0.10    0.25
  -5   2   1   33.59    1.43
   2   5   1   33.40    1.47
  -5   2   1   34.76    0.80
  -2  -5   1   33.81    1.37
   5  -2   1   33.23    1.40
   5  -2  -1   34.69    1.11
  -5   2  -1   33.12    1.37
  -2  -5  -1   34.80    1.52
   5  -2  -1   32.60    1.41
   2   5   2  218.67    5.52
   5  -2   2  226.88    6.10
  -2  -5   2  226.79    5.53
  -5   2   2  226.15    5.89
   5  -2  -2  222.40    5.73
  -2  -5  -2  217.53    6.63
  -5   2  -2  223.89    5.87
  -2  -5   3  208.68    5.39
   2   5   3  212.35    6.60
  -2  -5   3  208.94    4.05
   5  -2   3  208.13    6.05
  -5   2   3  214.20    5.91
   5  -2  -3  204.65    5.59
  -5   2  -3  210.07    5.94
  -2  -5  -3  207.57    5.55
   2   5   4  247.70    6.71
   5  -2   4  252.86    7.51
  -5   2   4  242.49    6.96
  -5   2   4  254.15    4.50
  -2  -5   4  253.24    5.67
  -2  -5   4  247.49    6.63
  -5   2  -4  248.11    7.23
   2   5  -4  246.17    6.29
   5  -2  -4  240.47    6.81
  -2  -5  -4  243.48    7.89
  -5   2   5   63.24    2.70
   5  -2   5   61.26    4.18
  -2  -5   5   64.24    3.37
  -5   2   5   62.83    1.53
   2   5   5   63.15    2.46
  -2  -5   5   63.28    2.00
  -2  -5  -5   65.66    2.57
   2   5  -5   60.33    1.33
   5  -2  -5   62.33    1.25
  -5   2  -5   60.22    2.82
   5  -2  -5   62.02    2.58
   2   5  -5   60.87    2.21
  -2  -5   6    1.50    0.78
   5  -2   6    1.21    1.01
  -5   2   6    2.09    0.51
  -5   2   6    2.34    0.89
   2   5   6    3.28    1.29
   2   5  -6    1.31    0.52
  -2  -5  -6    2.45    1.35
   5  -2  -6    1.05    0.47
  -5   2  -6    1.93    1.48
   5  -2  -6   -0.16    1.33
   2   5  -6    1.41    0.68
  -5   2   7   36.65    1.59
   2   5   7   39.16    2.08
  -2  -5   7   37.19    2.09
   5  -2   7   36.21    2.47
   2   5  -7   38.90    2.65
  -5   2  -7   41.22    2.40
  -2  -5  -7   38.95    3.16
   5  -2  -7   36.78    1.53
   5  -2  -7   37.07    2.15
   2   5  -7   37.21    1.57
   5  -2   8   33.57    4.01
  -5   2   8   34.28    1.84
  -2  -5   8   36.54    2.28
   2   5   8   36.55    2.23
   5  -2  -8   34.89    1.78
   2   5  -8   36.74    2.02
   2   5  -8   35.56    1.30
  -5   2  -8   37.01    2.52
   5  -2  -8   35.40    2.31
  -2  -5  -8   36.05    3.49
   2   5   9    2.24    1.97
  -5   2   9    2.77    1.08
   5  -2   9    2.48    1.52
  -2  -5   9    3.47    1.24
  -2  -5  -9    1.55    1.98
   2   5  -9    4.20    1.03
   2   5  -9    3.26    1.05
   5  -2  -9    3.47    0.63
   5  -2  -9    3.44    1.26
  -2  -5  10    2.07    1.09
   5  -2  10    1.51    1.40
  -5   2  10    1.58    0.65
  -5   2 -10    0.53    1.17
  -2  -5 -10   -0.56    1.03
   5  -2 -10    0.27    1.10
   2   5 -10    1.17    0.91
   5  -2 -10    1.14    0.61
   2   5 -10    1.49    0.61
   5  -2  11    0.82    2.05
  -2  -5  11    0.57    1.04
  -5   2  11    0.28    0.62
   2   5  11   -0.02    1.58
   2   5 -11    0.52    0.57
   2   5 -11   -0.29    0.82
   5  -2 -11    0.18    0.90
   5  -2 -11    0.71    1.01
  -2  -5 -11    0.52    0.93
  -5   2 -11   -0.62    1.06
   2   5  12    0.82    1.91
  -5   2  12    1.72    1.26
  -2  -5  12    0.86    2.10
   5  -2 -12   -0.17    2.04
  -2  -5 -12    1.01    1.20
   2   5 -12    0.62    1.22
   2   5 -12    1.14    1.06
   5  -2 -12    1.24    0.73
  -5   2 -12    2.24    1.35
   5  -2  13    5.57    1.80
  -2  -5  13    3.37    1.46
  -5   2  13   -0.17    0.95
   2   5  13    2.92    1.33
  -5   2 -13    0.72    1.41
  -2  -5 -13    1.62    2.18
   2   5 -13    3.75    1.22
   2   5 -13    3.19    1.41
   5  -2 -13    1.62    2.21
   5  -2 -13    2.75    0.90
   5  -2  14    0.72    2.08
   2   5  14   -1.09    1.06
  -5   2  14    0.13    0.72
  -2  -5  14    0.61    1.20
   2   5 -14    0.09    0.65
  -5   2 -14   -0.88    1.11
   5  -2 -14    0.06    1.10
  -2  -5 -14   -0.19    1.01
   2   5 -14   -0.67    0.93
   5  -2 -14   -0.40    1.06
  -5   2  15   -0.21    1.67
  -2  -5  15    2.02    2.63
   5  -2  15    3.51    1.87
   2   5  15    0.72    1.48
   2   5 -15    0.42    2.04
   5  -2 -15    2.20    0.94
  -2  -5 -15    3.33    1.43
   5  -2 -15    2.25    1.51
  -5   2 -15    3.60    2.38
   2   5 -15   -0.01    0.92
   2   5  16    1.44    1.43
  -2  -5  16    0.94    1.65
   5  -2  16    1.03    1.87
  -5   2  16    0.06    1.08
   2   5 -16    0.19    1.25
  -5   2 -16   -0.01    1.30
   5  -2 -16    3.10    1.42
  -2  -5 -16    1.13    2.38
   2   5 -16    0.04    0.92
   5  -2 -16    2.05    1.45
  -5   2 -16    2.75    1.42
   2   5  17    3.03    2.55
  -2  -5  17    2.44    1.86
   5  -2  17    0.77    1.98
  -5   2  17   -0.17    1.75
   5  -2 -17    1.16    1.00
   2   5 -17   -0.05    1.46
   2   5 -17    0.99    1.37
   5  -2 -17    0.86    1.49
  -5   2 -17    0.01    1.37
  -2  -5 -17   -1.75    1.85
  -5   2 -17    4.90    1.55
  -6   2   0  128.60    3.57
  -6   2   0  129.75    3.21
   6  -2   0  134.53    3.16
   2   6   0  134.66    3.42
  -2  -6   0  129.98    3.31
  -6   2   1    4.77    1.14
  -2  -6   1    3.73    0.66
   6  -2   1    3.68    0.67
   2   6   1    4.05    0.66
  -6   2   1    3.44    0.52
   6  -2  -1    3.36    0.34
  -2  -6  -1    4.42    1.12
  -6   2  -1    3.34    0.62
   6  -2  -1    3.35    0.66
  -6   2   2   14.24    1.15
   2   6   2   14.63    1.03
  -6   2   2   14.18    0.37
   6  -2   2   13.72    1.15
  -2  -6   2   14.97    1.07
  -6   2  -2   14.66    1.11
  -2  -6  -2   15.05    1.09
   6  -2  -2   14.34    0.38
   6  -2  -2   13.96    1.66
  -2  -6   3   59.63    2.07
   2   6   3   54.31    1.99
   6  -2   3   54.95    2.32
  -6   2   3   56.12    2.25
  -2  -6   3   54.13    1.09
  -2  -6  -3   55.70    2.09
  -6   2  -3   54.73    3.17
   6  -2  -3   55.77    2.17
   2   6   4  627.49   18.94
  -2  -6   4  622.92   14.35
  -6   2   4  601.62   17.65
  -2  -6   4  605.40   17.05
   6  -2   4  614.17   18.68
   6  -2  -4  621.12   19.53
  -6   2  -4  592.28   17.79
  -2  -6  -4  597.71   18.51
   2   6  -4  615.85   16.75
  -2  -6   5   53.28    1.67
  -6   2   5   51.50    1.04
  -6   2   5   50.36    2.49
   2   6   5   52.08    3.28
   6  -2   5   49.24    2.75
  -2  -6   5   53.08    2.28
   2   6  -5   53.60    2.95
  -2  -6  -5   53.00    2.41
  -6   2  -5   49.98    2.55
   6  -2  -5   53.66    2.41
   2   6   6    5.33    1.04
   6  -2   6    5.29    1.36
  -2  -6   6    5.50    1.08
  -2  -6   6    5.88    0.50
  -6   2   6    4.87    0.54
  -6   2   6    6.12    1.18
   2   6  -6    7.66    0.92
  -6   2  -6    5.68    1.24
   6  -2  -6    6.47    1.11
   6  -2  -6    5.21    0.46
  -2  -6  -6    7.00    1.74
   2   6  -6    5.54    0.58
   2   6   7    0.69    0.83
  -6   2   7    1.40    0.98
  -2  -6   7   -0.07    1.35
  -6   2   7    1.21    0.33
   2   6  -7    1.06    0.75
   2   6  -7    1.47    0.51
  -2  -6  -7    1.35    0.91
   6  -2  -7    1.35    0.45
   6  -2  -7    1.30    0.87
   6  -2   8   30.03    2.56
  -2  -6   8   26.32    3.19
   2   6   8   29.55    2.07
  -6   2   8   28.92    1.11
  -2  -6  -8   28.97    2.20
   2   6  -8   27.02    1.48
   2   6  -8   30.57    1.97
  -6   2  -8   29.81    2.52
   6  -2  -8   27.34    2.16
   6  -2  -8   28.73    1.41
   2   6   9   12.70    2.62
  -2  -6   9   14.79    2.74
   6  -2   9   15.70    2.16
  -6   2   9   12.64    0.90
   2   6  -9   12.89    0.84
  -6   2  -9   14.20    2.00
   6  -2  -9   12.54    1.75
   2   6  -9   11.69    1.51
   6  -2  -9   12.67    0.83
  -2  -6  -9   13.26    1.70
  -2  -6  10    0.06    0.98
  -6   2  10    0.05    0.49
   6  -2  10    0.51    1.19
   2   6  10   -0.87    0.91
   2   6 -10    1.23    0.70
  -2  -6 -10   -0.07    0.89
   6  -2 -10    0.35    0.70
   2   6 -10    1.42    1.27
   6  -2 -10    0.46    0.94
  -2  -6  11   12.55    1.87
   2   6  11    9.53    1.71
  -6   2  11    8.22    1.55
   6  -2 -11    7.59    1.72
   2   6 -11    8.44    2.30
  -6   2 -11    7.81    1.89
   2   6 -11    7.63    1.36
  -2  -6 -11    6.59    2.58
   6  -2 -11    5.18    1.40
   2   6  12   17.43    2.24
   6  -2  12   20.62    2.98
  -2  -6  12   20.76    2.56
  -6   2  12   19.63    1.46
  -2  -6 -12   21.00    2.37
   6  -2 -12   21.02    2.42
   2   6 -12   20.46    3.08
   6  -2 -12   18.33    1.36
   2   6 -12   23.86    2.04
   2   6  13    0.26    1.61
  -2  -6  13    0.87    1.83
  -6   2  13   -0.20    0.66
   6  -2  13   -0.12    1.38
  -2  -6 -13    0.47    1.04
   2   6 -13   -0.04    0.93
   6  -2 -13    0.70    0.59
   2   6 -13   -0.51    1.44
   6  -2 -13    0.84    1.07
   2   6  14    1.96    2.05
  -2  -6  14    0.88    1.55
   6  -2  14    3.47    1.68
   6  -2 -14    1.90    1.24
   2   6 -14    0.83    1.18
   2   6 -14   -0.01    1.12
   6  -2 -14    0.34    1.37
  -6   2 -14    0.55    1.44
  -2  -6 -14    1.92    1.31
  -2  -6  15    0.84    1.55
  -6   2  15   -0.22    0.86
   2   6  15    1.12    1.27
   6  -2  15    0.68    1.64
   6  -2 -15    1.49    0.77
   6  -2 -15    0.83    2.06
   2   6 -15    1.02    1.16
   2   6 -15   -0.07    0.72
  -6   2 -15    0.01    1.15
  -6   2 -15    1.28    1.19
  -2  -6 -15    2.91    2.05
  -2  -6  16   -0.03    2.16
   2   6  16    0.61    1.14
  -6   2  16    0.18    1.24
  -6   2 -16   -0.04    1.07
   2   6 -16   -0.01    0.64
   2   6 -16    0.95    1.04
  -6   2 -16   -0.17    1.04
  -2  -6 -16    1.00    1.28
   6  -2 -16    0.27    0.70
   6  -2 -16   -1.41    1.14
   2   6  17   -0.22    1.50
   6  -2  17    0.88    1.96
  -2  -6  17    2.20    1.85
   2   6 -17    0.65    1.26
  -2  -6 -17    0.51    1.78
  -6   2 -17    1.13    1.71
   6  -2 -17    0.91    1.34
   6  -2 -17    0.87    1.45
  -6   2 -17   -0.06    2.11
  -7   2   0   -0.09    0.31
  -2  -7   0   -0.15    0.42
  -7   2   0    0.28    0.63
   7  -2   0   -0.06    0.32
  -7   2   1   25.19    1.30
  -7   2   1   24.99    1.04
   2   7   1   23.69    1.25
  -2  -7   1   25.36    1.28
   7  -2   1   24.02    1.24
   7  -2  -1   25.85    1.07
   7  -2  -1   24.56    1.24
  -7   2  -1   24.05    1.20
  -2  -7  -1   24.58    1.26
  -7   2  -1   24.74    1.09
  -2  -7   2  133.58    3.74
   7  -2   2  129.75    3.93
  -7   2   2  132.09    3.85
   2   7   2  131.24    3.62
  -7   2   2  128.16    2.25
   7  -2  -2  131.50    2.42
   7  -2  -2  131.59    4.66
  -7   2  -2  122.16    3.70
  -2  -7  -2  122.64    3.52
  -7   2   3   45.71    2.09
   7  -2   3   48.11    3.11
  -2  -7   3   43.69    1.87
   2   7   3   43.38    1.82
  -7   2  -3   43.58    2.04
   7  -2  -3   44.95    2.03
  -2  -7  -3   43.53    1.91
  -2  -7   4   16.05    0.75
  -7   2   4   15.47    1.44
   7  -2   4   17.56    2.55
   2   7   4   15.66    1.98
  -2  -7   4   15.30    1.38
   7  -2  -4   14.24    1.49
  -7   2  -4   15.71    1.50
  -2  -7  -4   15.70    1.38
  -2  -7   5  420.06    9.70
  -7   2   5  403.17   13.88
  -2  -7   5  397.05   11.61
   2   7   5  394.14   12.67
  -2  -7  -5  396.17   11.61
  -7   2  -5  386.22   12.03
   7  -2  -5  387.16   11.72
   2   7  -5  411.45   11.57
  -2  -7   6   73.25    3.03
   2   7   6   67.30    2.74
  -7   2   6   65.71    1.37
   7  -2   6   67.00    3.51
  -7   2   6   74.87    4.44
  -2  -7   6   70.95    1.70
   7  -2  -6   66.53    2.93
   2   7  -6   70.20    3.70
  -2  -7  -6   70.60    2.99
  -7   2  -6   65.86    3.29
   2   7   7    1.57    0.91
   7  -2   7    1.31    1.27
  -7   2   7    1.35    0.44
  -2  -7   7    2.31    1.00
  -7   2   7    1.13    1.73
   2   7  -7    1.24    0.86
  -7   2  -7    2.17    1.16
  -2  -7  -7    1.37    1.00
   7  -2  -7    2.07    0.97
   7  -2  -7    2.01    0.35
   7  -2   8    1.08    1.15
  -2  -7   8    1.10    0.91
   2   7   8    0.04    0.82
  -7   2   8    0.03    0.51
  -7   2   8    0.83    1.00
   7  -2  -8    0.30    0.85
  -2  -7  -8    0.19    0.91
   7  -2  -8    0.53    0.42
   2   7  -8    0.63    0.47
   2   7  -8   -0.43    1.20
   2   7   9    3.68    1.93
  -2  -7   9    2.73    1.33
  -7   2   9    2.40    0.83
  -2  -7  -9    3.07    1.26
   2   7  -9    1.78    1.13
   7  -2  -9    2.92    0.46
   2   7  -9    3.96    0.74
  -7   2  -9    4.12    1.45
   7  -2  -9    3.92    2.00
  -7   2  10   14.85    1.41
  -2  -7  10   16.87    2.10
   2   7  10   14.36    1.91
   7  -2 -10   14.00    0.86
   2   7 -10   12.54    1.77
   2   7 -10   14.05    0.85
   7  -2 -10   14.79    3.03
  -2  -7 -10   16.09    1.86
   7  -2  11    7.19    2.22
  -7   2  11    7.18    0.83
   2   7  11    6.88    1.57
  -2  -7  11    6.26    2.82
   2   7 -11    6.11    1.08
   7  -2 -11    5.37    0.75
  -2  -7 -11    8.43    1.62
   7  -2 -11    7.85    2.57
   2   7 -11    7.45    1.49
  -7   2  12    4.29    0.84
   2   7  12    4.69    1.47
  -2  -7  12    5.51    1.72
   2   7 -12    4.13    1.41
   7  -2 -12    3.67    0.75
  -2  -7 -12    6.57    1.66
   7  -2 -12    5.25    1.56
  -7   2 -12    4.48    1.77
   2   7 -12    5.36    1.13
  -2  -7  13    6.72    1.93
   2   7  13    6.46    1.63
  -7   2  13    4.72    1.45
   2   7 -13    5.38    1.27
   7  -2 -13    4.55    0.87
   2   7 -13    4.63    1.51
  -2  -7 -13    4.20    2.68
   7  -2 -13    5.30    1.75
   2   7  14    0.41    1.09
  -2  -7  14    0.27    1.34
  -7   2  14    0.08    0.62
   2   7 -14    0.01    0.86
  -2  -7 -14   -1.71    1.10
   2   7 -14    1.76    1.00
   7  -2 -14    0.03    1.14
   7  -2 -14    0.76    0.91
  -7   2  15    0.00    0.66
  -2  -7  15    2.25    2.13
   2   7  15    0.54    1.08
   7  -2  15    0.96    1.41
   7  -2 -15    0.74    1.14
   2   7 -15    0.00    0.51
  -2  -7 -15    0.95    1.12
   7  -2 -15   -0.47    0.57
  -7   2 -15    0.00    0.97
   2   7 -15    0.41    1.01
   2   7  16    0.58    2.11
  -2  -7  16    2.76    1.64
  -7   2 -16    0.06    1.22
   2   7 -16   -0.57    1.86
   7  -2 -16   -1.36    1.36
   7  -2 -16    0.65    0.70
  -2  -7 -16    2.90    2.30
  -2  -7  17   -0.39    2.01
   2   7  17   -0.79    1.54
   7  -2  17    3.30    2.08
  -7   2 -17    0.03    1.44
  -7   2 -17   -0.30    1.86
   2   7 -17    3.06    1.30
  -2  -7 -17    1.99    1.92
  -8   2   0   52.23    1.80
  -8   2   0   50.26    1.60
   8  -2   0   52.37    1.65
  -2  -8   0   52.68    1.88
  -2  -8   1   32.29    2.18
  -8   2   1   30.97    0.96
   8  -2   1   33.14    1.47
  -8   2   1   33.77    1.53
   2   8   1   33.04    2.13
  -2  -8  -1   31.97    1.50
  -8   2  -1   35.23    1.36
  -8   2  -1   31.39    1.36
   8  -2  -1   33.89    1.35
  -8   2   2  193.96    3.74
   8  -2   2  189.81    5.55
  -8   2   2  188.63    5.39
   2   8   2  196.14    5.29
  -2  -8   2  197.24    5.53
  -8   2  -2  184.78    5.34
  -2  -8  -2  188.49    5.19
   8  -2  -2  190.79    3.61
   8  -2  -2  198.33    5.53
   2   8   3  276.51    7.46
  -2  -8   3  280.11    7.82
  -8   2   3  273.36    7.93
   8  -2   3  278.69    8.32
   8  -2  -3  280.29    7.93
  -8   2  -3  259.31    7.78
  -2  -8  -3  265.17    7.33
  -2  -8   4    0.74    0.73
  -8   2   4    0.86    0.78
   2   8   4    1.00    1.05
   8  -2   4   -0.26    0.85
  -2  -8   4    0.58    0.20
  -8   2  -4    1.10    0.77
  -2  -8  -4    0.71    0.71
   8  -2  -4    0.63    0.74
   8  -2   5    1.28    1.04
  -2  -8   5    1.46    0.38
  -2  -8   5    0.86    0.86
   2   8   5    1.00    1.24
  -8   2   5    0.00    0.93
   8  -2  -5    0.04    1.36
  -2  -8  -5    1.89    1.37
  -2  -8   6    5.45    1.26
  -2  -8   6    5.93    0.62
  -8   2   6    5.47    1.37
   8  -2   6    6.30    1.53
   2   8   6    4.86    1.12
   8  -2  -6    6.60    1.31
  -8   2  -6    6.93    1.38
   2   8  -6    5.83    1.12
  -2  -8  -6    4.90    1.26
  -2  -8   7   54.10    2.95
   2   8   7   57.12    2.69
  -8   2   7   56.16    3.09
  -8   2   7   51.56    1.00
  -8   2  -7   51.89    3.23
   2   8  -7   52.38    3.65
   8  -2  -7   52.81    2.85
  -2  -8  -7   56.90    2.94
  -8   2   8   26.80    1.09
   2   8   8   28.21    2.07
  -8   2   8   27.86    2.49
  -2  -8   8   25.38    2.30
   2   8  -8   30.12    2.00
   8  -2  -8   25.37    3.38
   8  -2  -8   25.05    0.67
  -2  -8  -8   28.99    2.28
  -2  -8   9   35.06    2.78
   2   8   9   31.89    2.40
  -8   2   9   32.51    1.09
   2   8  -9   32.24    2.36
   8  -2  -9   33.47    2.63
  -2  -8  -9   33.52    3.84
   8  -2  -9   32.49    0.97
   2   8  10   -0.31    0.84
  -8   2  10    0.31    0.33
  -2  -8  10    0.02    0.99
   8  -2  10   -0.71    1.20
   2   8 -10   -0.61    0.79
   8  -2 -10    0.38    0.43
   8  -2 -10   -0.61    0.92
   2   8 -10    0.06    0.45
  -2  -8 -10   -1.74    1.38
  -8   2 -10    0.83    1.05
  -8   2  11   29.03    1.86
   2   8  11   30.44    2.50
  -2  -8  11   32.87    3.01
   2   8 -11   30.35    1.19
  -2  -8 -11   33.74    2.75
   8  -2 -11   35.63    2.74
   8  -2 -11   31.89    1.71
   2   8 -11   30.96    2.45
  -8   2  12   11.75    1.49
   2   8  12   12.65    1.88
  -2  -8  12   14.39    2.33
   2   8 -12   14.17    2.88
   8  -2 -12   14.22    1.37
   2   8 -12   13.34    0.88
  -2  -8 -12   13.98    2.17
   8  -2 -12   14.83    2.14
  -2  -8  13   12.81    3.90
  -8   2  13   12.59    1.07
   2   8  13   14.31    2.09
   2   8 -13   11.82    0.95
   2   8 -13   13.60    2.98
  -2  -8 -13   11.49    2.18
   8  -2 -13   12.39    2.19
   8  -2 -13   11.33    1.50
  -2  -8  14    1.62    1.78
  -8   2  14    2.54    1.21
   2   8  14    2.18    1.49
   8  -2 -14    1.55    2.57
  -8   2 -14    1.42    2.96
  -2  -8 -14    2.91    1.55
   2   8 -14    3.20    1.36
   8  -2 -14    1.41    1.05
   2   8 -14    2.70    0.65
   2   8  15    2.37    1.23
  -2  -8  15    1.53    1.62
  -8   2  15   -0.01    0.65
  -2  -8 -15    1.93    2.16
   8  -2 -15    1.06    1.35
   2   8 -15    1.44    1.19
   8  -2 -15    0.74    0.57
   2   8 -15    0.03    0.54
  -2  -8  16   -2.71    1.63
   2   8  16    1.19    1.25
  -8   2 -16   -0.01    1.16
   8  -2 -16   -1.91    1.26
  -2  -8 -16   -0.86    1.49
   2   8 -16    1.13    1.10
   9  -2   0    0.45    0.56
  -9   2   0    0.05    0.53
  -2  -9   0   -0.10    0.46
  -9   2   0   -0.31    0.44
   9  -2   1    6.73    1.35
  -9   2   1    8.63    0.98
   2   9   1    7.27    0.93
  -9   2   1    6.38    0.82
  -2  -9   1    6.95    0.95
  -9   2  -1    7.54    1.29
  -2  -9  -1    7.10    0.96
  -9   2  -1    6.03    0.85
   9  -2  -1    6.73    0.55
  -9   2   2    5.63    0.55
  -2  -9   2    5.48    1.03
   9  -2   2    5.17    1.00
   2   9   2    5.49    0.93
  -9   2   2    6.37    1.04
  -2  -9  -2    5.37    0.96
  -9   2  -2    5.86    0.94
   9  -2  -2    5.91    0.56
   9  -2  -2    7.71    1.02
   2   9   3    0.96    1.15
  -9   2   3    1.19    0.82
  -2  -9   3    2.06    0.83
  -9   2   3    1.56    0.19
   9  -2   3    2.07    0.87
   9  -2  -3    1.53    0.16
  -2  -9  -3    1.66    0.79
  -9   2  -3    1.08    0.78
   9  -2  -3    0.78    0.80
  -2  -9   4   25.43    2.70
  -9   2   4   25.77    2.74
   2   9   4   26.31    2.45
  -2  -9   4   27.07    0.86
   9  -2  -4   29.20    1.78
  -2  -9  -4   28.27    2.53
  -9   2  -4   26.54    1.83
  -9   2   5    9.15    2.27
   2   9   5    9.41    1.88
  -2  -9   5    9.30    0.58
  -2  -9   5    7.04    1.39
   9  -2  -5    9.33    1.37
  -2  -9  -5    8.80    1.29
  -9   2  -5    9.85    1.46
  -2  -9   6   10.35    1.54
   2   9   6    8.56    1.27
  -9   2   6   11.19    2.43
  -2  -9   6    9.68    0.43
   9  -2  -6    9.15    1.44
  -2  -9  -6    9.97    1.42
  -9   2  -6   10.47    1.64
   2   9   7   35.26    2.23
  -2  -9   7   36.82    2.55
  -9   2   7   34.48    3.94
   9  -2  -7   36.73    3.78
  -2  -9  -7   36.90    3.73
  -9   2  -7   34.03    2.85
   2   9  -7   34.57    2.23
  -9   2   8   49.86    0.96
   2   9   8   49.90    3.97
  -2  -9   8   50.57    3.23
  -9   2   8   53.48    3.38
   2   9  -8   53.48    2.87
  -2  -9  -8   50.38    3.11
   9  -2  -8   51.18    3.25
  -9   2   9   19.44    2.57
  -9   2   9   17.58    0.91
  -2  -9   9   22.45    2.44
   9  -2   9   20.35    2.95
   2   9   9   22.64    2.05
   2   9  -9   20.57    3.19
  -2  -9  -9   19.40    2.24
   9  -2  -9   20.05    2.28
   2   9  10    2.21    1.17
  -2  -9  10    2.10    1.50
  -9   2  10    2.09    0.38
   2   9 -10    1.52    1.19
  -2  -9 -10    1.68    1.27
  -9   2 -10    2.86    1.55
   9  -2 -10    1.63    1.33
  -2  -9  11    5.37    2.70
  -9   2  11    5.05    0.54
   2   9  11    3.80    1.36
   2   9 -11    4.58    1.43
   9  -2 -11    5.80    1.57
  -2  -9 -11    3.59    1.72
   9  -2 -11    3.74    0.45
  -9   2  12    3.42    0.91
   2   9  12    2.51    1.37
  -2  -9  12    4.03    1.74
  -2  -9 -12    3.31    1.57
   9  -2 -12    3.87    1.55
   2   9 -12    2.99    1.41
   9  -2 -12    2.70    0.49
  -9   2  13    2.60    0.92
   2   9  13    2.73    2.23
  -2  -9  13    2.04    1.78
  -2  -9 -13    1.71    2.39
   9  -2 -13    2.72    1.56
   2   9 -13    2.88    1.38
   9  -2 -13    1.99    0.53
  -9   2 -13    3.20    1.80
   2   9  14    0.09    1.67
  -9   2  14    0.04    0.47
  -2  -9  14    0.54    1.43
   9  -2 -14   -0.20    1.17
   9  -2 -14    0.57    0.41
  -2  -9 -14   -0.35    1.18
   2   9 -14   -0.87    1.03
  -2  -9  15    5.10    3.46
   2   9  15    2.95    1.63
   2   9 -15    1.37    1.59
  -2  -9 -15    6.65    1.85
   9  -2 -15    2.72    1.83
  -2  -9  16    6.04    1.39
   2   9  16   -1.20    1.05
  -2  -9 -16   -0.41    1.28
   9  -2 -16   -1.80    1.09
   2   9 -16   -0.19    0.97
 -10   2   0  585.96   16.92
  -2 -10   0  580.91   16.50
  10  -2   0  583.42   15.87
 -10   2   0  590.32   16.57
 -10   2   1  246.28    6.93
  10  -2   1  235.42    6.64
  -2 -10   1  230.68    6.59
 -10   2   1  228.87    6.17
 -10   2  -1  230.17    7.39
  10  -2  -1  237.31    5.68
  -2 -10  -1  236.66    7.88
 -10   2  -1  239.93    6.51
  -2 -10   2    5.68    1.07
  10  -2   2    4.51    1.00
 -10   2   2    5.51    0.41
   2  10   2    5.67    0.95
 -10   2   2    8.17    1.11
  10  -2  -2    6.15    0.64
  -2 -10  -2    6.06    1.01
 -10   2  -2    5.95    1.49
 -10   2   3   37.67    0.90
   2  10   3   36.46    1.83
  10  -2   3   36.23    2.06
  -2 -10   3   36.40    2.06
 -10   2   3   37.26    2.11
  -2 -10  -3   35.56    2.86
  10  -2  -3   38.52    2.96
 -10   2  -3   34.68    1.97
  10  -2  -3   34.83    0.77
  10  -2   4  123.23    4.77
   2  10   4  125.62    4.18
 -10   2   4  120.58    4.53
  -2 -10   4  125.65    4.50
  10  -2  -4  123.06    4.45
 -10   2  -4  116.48    4.49
  -2 -10  -4  116.18    4.16
 -10   2   5    0.75    0.87
  -2 -10   5    0.14    0.31
   2  10   5    0.40    0.72
  -2 -10   5    0.49    1.30
  10  -2   5    0.91    0.91
  -2 -10  -5    0.64    1.18
  10  -2  -5   -0.22    0.80
 -10   2  -5    1.27    0.85
  -2 -10   6    4.00    2.18
   2  10   6    6.44    1.84
 -10   2   6    5.44    1.43
  10  -2   6    6.55    1.63
  -2 -10   6    5.48    0.45
  10  -2  -6    5.97    2.09
  -2 -10  -6    6.33    1.28
 -10   2   7    1.09    1.23
   2  10   7    2.12    0.99
  -2 -10   7    1.91    1.87
  10  -2   7    2.11    1.41
  -2 -10  -7    1.84    1.11
  10  -2  -7    1.70    1.18
 -10   2  -7    0.17    1.29
 -10   2   8   33.36    3.07
  -2 -10   8   33.15    4.46
   2  10   8   33.03    3.66
 -10   2  -8   37.20    3.19
   2  10  -8   37.65    2.57
  -2 -10  -8   35.44    2.75
  10  -2  -8   35.61    2.90
 -10   2   9    1.10    1.41
  -2 -10   9    2.79    2.14
 -10   2   9    1.06    0.11
 -10   2   9    1.23    0.12
   2  10   9    1.08    1.08
  -2 -10  -9    2.32    1.16
  10  -2  -9    0.50    2.01
   2  10  -9    0.36    1.11
 -10   2  10   15.13    2.60
 -10   2  10   18.04    0.74
  -2 -10  10   20.75    2.47
   2  10  10   20.66    2.01
  -2 -10 -10   21.78    2.24
   2  10 -10   19.93    2.13
  10  -2 -10   21.79    3.70
  -2 -10  11    0.21    1.04
 -10   2  11   -0.01    0.34
   2  10 -11    0.27    1.35
  10  -2 -11   -1.22    1.60
  -2 -10 -11    0.85    0.94
  10  -2  12   49.27    4.51
 -10   2  12   43.01    1.85
  -2 -10  12   52.27    4.19
   2  10  12   51.24    4.88
  10  -2 -12   49.22    5.38
  -2 -10 -12   51.23    3.76
   2  10 -12   46.77    4.72
  -2 -10  13    1.84    1.33
   2  10  13   -0.73    1.05
 -10   2  13    0.31    0.51
   2  10 -13    0.62    1.64
  -2 -10 -13   -0.48    1.15
  10  -2 -13    0.91    1.88
  -2 -10  14    2.32    3.17
   2  10  14    2.24    1.50
  10  -2 -14    2.56    2.57
  -2 -10 -14    2.29    1.70
   2  10 -14    4.44    2.33
  -2 -10  15   -1.21    1.67
   2  10  15    0.13    1.20
  -2 -10 -15    1.82    1.34
   2  10 -15   -0.12    1.12
  10  -2 -15   -2.25    1.26
   2  10  16    0.75    2.52
  -2 -10  16   -1.37    2.23
   2  10 -16    2.47    1.53
  -2 -10 -16   -0.31    3.11
  10  -2 -16    3.76    1.65
  -2 -11   0   -0.18    0.64
 -11   2   0    0.52    0.71
  11  -2   0   -0.24    0.47
 -11   2   0   -0.75    1.01
 -11   2   1   17.96    2.37
 -11   2   1   16.75    1.30
  11  -2   1   15.65    1.26
  -2 -11   1   15.14    1.44
  11  -2  -1   17.63    1.40
 -11   2  -1   18.19    1.33
  -2 -11  -1   17.17    2.23
 -11   2  -1   16.63    1.85
  -2 -11   2   95.19    3.55
   2  11   2   92.84    3.25
 -11   2   2   93.54    3.57
  11  -2   2   91.42    3.45
 -11   2   2   93.93    2.23
  -2 -11   2   95.27    3.35
 -11   2  -2   85.74    4.21
  -2 -11  -2   92.69    3.36
  11  -2  -2   96.24    2.20
  11  -2   3   29.06    1.97
 -11   2   3   29.17    0.90
 -11   2   3   28.37    2.06
  -2 -11   3   28.80    1.99
   2  11   3   27.35    1.72
 -11   2  -3   26.38    1.82
  -2 -11  -3   29.78    1.76
  11  -2  -3   28.83    0.80
  11  -2  -3   29.74    2.01
   2  11   4  148.67    4.91
  -2 -11   4  146.00    5.38
 -11   2   4  149.02    5.42
  -2 -11  -4  135.75    4.78
  11  -2  -4  145.88    5.30
 -11   2  -4  135.97    5.26
  -2 -11   5    2.12    0.37
 -11   2   5    1.50    1.13
  -2 -11   5    2.53    1.07
   2  11   5    0.55    0.91
  -2 -11  -5    1.89    0.96
 -11   2  -5    1.01    1.07
  11  -2  -5    1.12    1.04
  -2 -11   6   43.32    1.02
  -2 -11   6   42.30    2.83
 -11   2   6   48.89    2.97
   2  11   6   45.68    2.45
  -2 -11  -6   39.50    2.60
  11  -2  -6   43.50    2.83
 -11   2   7    8.21    2.92
   2  11   7    7.50    1.40
  -2 -11   7    9.48    1.78
  -2 -11  -7    7.57    2.59
  11  -2  -7    8.66    1.68
   2  11   8  195.88    7.22
  -2 -11   8  199.43    8.27
 -11   2   8  191.47   10.53
 -11   2  -8  184.70    8.42
  -2 -11  -8  192.71    7.66
  11  -2  -8  203.45   10.34
   2  11   9    0.45    1.00
  -2 -11   9    0.93    1.32
 -11   2   9    0.86    1.35
  11  -2  -9    1.25    1.22
   2  11  -9    0.01    1.08
  -2 -11  -9    1.00    1.10
   2  11  10    1.21    1.40
  -2 -11  10    0.19    1.13
 -11   2  10   -1.28    1.20
  -2 -11 -10   -0.45    1.05
   2  11 -10    0.34    0.94
  11  -2 -10    1.49    1.07
   2  11  11   -0.37    0.89
  -2 -11  11    0.01    1.26
  -2 -11 -11   -0.60    1.13
   2  11 -11   -0.14    1.02
  11  -2 -11   -0.24    1.13
  -2 -11  12    2.62    1.45
 -11   2  12    0.56    0.26
 -11   2  12    0.17    0.28
   2  11  12    1.64    1.11
  11  -2 -12    1.18    1.28
  -2 -11 -12   -0.71    1.29
   2  11 -12   -0.07    1.10
   2  11  13    0.01    1.09
  -2 -11  13    0.95    2.37
  -2 -11 -13    0.69    1.92
  11  -2 -13    0.47    1.29
   2  11 -13    0.53    1.12
  -2 -11  14    3.07    1.88
   2  11  14    0.75    1.32
  -2 -11 -14    0.96    2.42
   2  11 -14    2.03    1.40
  11  -2 -14    0.02    1.61
   2  11  15   -0.01    1.25
  -2 -11  15    1.50    1.72
  11  -2 -15    0.98    1.48
  -2 -11 -15   -0.11    1.45
   2  11 -15    0.19    1.18
   2  11  16    6.93    2.12
  -2 -11  16    5.50    4.68
   2  11 -16    6.48    2.12
  11  -2 -16    5.78    2.43
  -2 -11 -16   10.31    2.59
 -12   2   0  253.82    8.94
 -12   2   0  237.60    7.72
  12  -2   0  245.83    7.89
  -2 -12   0  247.37    7.34
  12  -2   1    6.90    1.70
  -2 -12   1   10.25    1.20
 -12   2   1    9.78    1.12
 -12   2   1   10.38    2.05
 -12   2  -1   10.38    1.82
  12  -2  -1    8.24    0.78
 -12   2  -1    7.44    1.58
  -2 -12  -1    9.86    1.94
  -2 -12   2    4.13    0.94
  -2 -12   2    2.99    1.00
 -12   2   2    1.91    0.42
 -12   2   2    2.50    1.68
  12  -2   2    2.55    0.92
  -2 -12  -2    2.56    0.94
 -12   2  -2    1.48    1.36
  12  -2  -2    2.06    0.68
 -12   2   3    1.98    1.04
   2  12   3    3.93    1.36
  12  -2   3    1.41    0.96
 -12   2   3    1.34    0.26
  -2 -12   3    1.00    0.97
  -2 -12  -3    2.14    0.89
 -12   2  -3    1.83    0.90
  12  -2  -3    1.63    0.37
 -12   2   4   13.07    2.71
   2  12   4   13.56    2.17
  -2 -12   4   12.00    1.66
 -12   2   4   11.99    0.28
  12  -2   4   12.52    1.72
 -12   2  -4   10.30    1.58
  -2 -12  -4   11.40    2.27
  12  -2  -4   10.87    1.62
  -2 -12   5    3.25    1.21
  -2 -12   5    2.29    0.37
  12  -2   5    1.95    1.29
   2  12   5    1.43    0.99
  -2 -12  -5    1.45    1.06
  12  -2  -5    2.22    1.16
 -12   2  -5    1.71    1.20
  -2 -12   6    0.54    0.12
 -12   2   6    1.18    1.77
   2  12   6    1.27    0.86
  -2 -12   6   -0.16    1.08
  12  -2  -6    1.07    1.03
  -2 -12  -6    0.59    0.94
  -2 -12   7   22.87    2.43
   2  12   7   17.49    2.98
 -12   2   7   16.31    2.44
  12  -2  -7   20.85    2.31
  -2 -12  -7   19.43    2.12
 -12   2   8    0.88    1.72
   2  12   8    3.11    1.27
  -2 -12   8    2.56    1.67
  12  -2  -8    3.63    1.54
 -12   2  -8    3.29    1.80
  -2 -12  -8    4.13    1.43
   2  12   9    6.56    2.33
  -2 -12   9    5.33    1.94
 -12   2   9    6.66    1.99
  -2 -12  -9    6.38    1.61
  12  -2  -9    7.02    1.73
  -2 -12  10    7.24    2.13
 -12   2  10    7.17    2.18
   2  12  10    8.21    1.57
  -2 -12 -10    8.34    2.90
  12  -2 -10    7.51    2.98
  -2 -12  11    1.26    2.36
 -12   2  11   -0.89    1.37
   2  12  11    1.69    1.01
   2  12 -11    0.45    1.40
  12  -2 -11   -1.19    2.11
  -2 -12 -11    0.83    1.30
  -2 -12  12    0.49    1.53
   2  12  12    1.63    1.11
  -2 -12 -12    0.13    1.31
   2  12 -12   -0.11    1.14
  12  -2 -12    1.51    2.15
  -2 -12  13    2.01    1.99
   2  12  13    1.52    1.40
  12  -2 -13    1.32    2.73
  -2 -12 -13    2.50    1.65
   2  12 -13    3.14    1.48
  -2 -12  14   -0.66    1.45
   2  12  14   -1.99    1.53
   2  12 -14    2.08    1.05
  -2 -12 -14   -1.09    1.20
  12  -2 -14   -0.62    1.94
   2  12  15   -1.37    2.15
  -2 -12  15    0.33    3.12
  12  -2 -15    3.03    2.50
   2  12 -15   -1.22    1.39
  -2 -12 -15   -2.08    1.70
 -13   2   0   -0.34    0.74
 -13   2   0    0.07    0.82
  13  -2   0   -0.44    0.54
  -2 -13   0   -0.62    1.20
 -13   2   1   18.86    1.08
 -13   2   1   17.95    2.85
  -2 -13   1   21.83    1.71
  13  -2   1   19.14    1.51
 -13   2  -1   22.49    1.62
 -13   2  -1   19.44    2.19
  13  -2  -1   22.26    1.68
  -2 -13  -1   18.81    2.63
  -2 -13   2   11.22    1.64
 -13   2   2   16.80    2.64
  13  -2   2   11.91    1.52
  -2 -13   2   12.34    2.38
 -13   2   2   11.92    0.76
 -13   2  -2   16.37    1.43
  13  -2  -2   13.09    1.13
  -2 -13  -2   10.56    1.54
 -13   2  -2   14.79    1.37
  -2 -13   3   39.06    2.62
 -13   2   3   41.02    1.13
   2  13   3   40.80    2.22
  13  -2   3   37.47    2.42
 -13   2   3   43.13    3.75
 -13   2  -3   36.97    2.35
  13  -2  -3   38.56    0.98
  -2 -13  -3   39.69    2.37
   2  13   4   18.36    1.69
 -13   2   4   21.31    3.09
 -13   2   4   18.81    0.53
  -2 -13   4   20.50    2.06
  13  -2  -4   20.12    1.98
 -13   2  -4   16.83    1.92
  -2 -13  -4   20.11    1.82
  -2 -13   5   37.84    1.06
  -2 -13   5   39.84    2.86
   2  13   5   35.48    2.34
 -13   2   5   38.78    2.81
 -13   2  -5   37.35    2.72
  -2 -13  -5   36.55    3.70
  13  -2  -5   40.54    2.75
  -2 -13   6   12.43    2.01
 -13   2   6   12.64    2.05
   2  13   6   12.09    1.61
  13  -2  -6   13.38    1.94
  -2 -13  -6   11.13    2.80
   2  13   7   31.56    2.35
  -2 -13   7   30.18    2.96
 -13   2   7   31.78    2.97
  -2 -13  -7   27.40    2.55
  13  -2  -7   28.24    2.77
 -13   2   8    1.53    1.45
   2  13   8    1.90    1.66
  -2 -13   8    0.29    1.43
 -13   2  -8    1.41    1.44
  13  -2  -8    1.77    2.02
  -2 -13  -8    0.66    1.17
 -13   2   9    4.52    2.00
   2  13   9    6.08    1.46
  -2 -13   9    5.65    1.97
  -2 -13  -9    6.76    1.64
  13  -2  -9    5.34    1.74
  -2 -13  10    4.37    3.28
   2  13  10    4.94    1.44
 -13   2  10    3.90    3.09
  -2 -13 -10    8.03    1.83
  13  -2 -10    4.27    1.84
  -2 -13  11    1.27    1.59
   2  13  11    0.66    1.80
 -13   2  11    1.00    1.51
  13  -2 -11    0.55    1.43
 -13   2 -11   -0.04    1.55
  -2 -13 -11    2.27    1.42
  -2 -13  12    0.78    1.48
   2  13  12   -0.26    1.73
  13  -2 -12    0.82    1.34
  -2 -13 -12    0.42    1.34
  -2 -13  13   -0.88    1.84
   2  13  13   -0.17    1.24
  13  -2 -13   -0.40    1.53
  -2 -13 -13   -2.99    1.54
   2  13  14   -0.84    1.11
  -2 -13  14   -2.86    2.56
  -2 -13 -14    1.00    1.31
  13  -2 -14    0.25    1.31
   2  13  15    0.35    1.56
  -2 -13  15    2.20    2.32
  -2 -13 -15    0.76    2.95
  13  -2 -15    3.43    1.77
 -14   2   0    0.96    0.65
  14  -2   0    0.65    1.11
  -2 -14   0    1.06    1.50
 -14   2   0    2.00    0.96
  -2 -14   1    1.68    1.42
 -14   2   1    1.23    0.95
  14  -2   1    0.55    1.23
 -14   2   1    0.37    0.52
  14  -2  -1    1.61    0.55
 -14   2  -1    0.20    0.70
  -2 -14  -1    0.32    0.89
 -14   2  -1    0.09    0.85
 -14   2   2   31.67    1.29
  -2 -14   2   30.43    2.35
  -2 -14   2   32.24    2.19
 -14   2   2   33.72    3.76
  14  -2   2   31.67    2.20
  -2 -14  -2   31.26    2.25
 -14   2  -2   29.25    2.05
  14  -2  -2   34.52    1.27
 -14   2  -2   31.35    2.10
  -2 -14   3    6.26    1.51
 -14   2   3    7.37    2.39
 -14   2   3    7.01    0.52
  -2 -14   3    5.90    1.38
  -2 -14  -3    6.27    1.40
  14  -2  -3    6.73    0.45
 -14   2  -3    5.36    1.34
 -14   2   4    1.34    1.12
  -2 -14   4    0.89    1.18
 -14   2   4    1.03    0.29
  14  -2   4    1.01    1.13
   2  14   4    0.75    0.91
 -14   2  -4    0.61    1.02
  -2 -14  -4    0.45    0.98
   2  14   5    3.94    1.26
  -2 -14   5    4.81    0.30
  -2 -14   5    5.17    1.66
 -14   2   5    3.33    1.62
  -2 -14  -5    3.76    1.38
  14  -2  -5    5.38    1.55
 -14   2   6    0.89    1.19
  -2 -14   6    1.23    1.17
   2  14   6    0.11    0.91
  14  -2  -6    0.19    1.10
  -2 -14  -6   -0.19    0.99
  -2 -14   7    0.10    1.33
 -14   2   7    0.75    1.36
   2  14   7    1.01    0.98
  -2 -14  -7    0.68    1.73
  14  -2  -7    0.45    1.89
  -2 -14   8    4.40    1.76
 -14   2   8    2.64    2.69
   2  14   8    2.87    1.22
  14  -2  -8    1.42    1.46
 -14   2  -8    3.59    1.69
  -2 -14  -8    2.17    2.18
 -14   2   9    4.18    1.61
  -2 -14   9    2.15    2.84
   2  14   9    2.23    1.21
  -2 -14  -9    2.97    1.50
  14  -2  -9    2.40    1.55
 -14   2  10   11.40    2.53
   2  14  10   11.38    2.79
  -2 -14  10   11.70    2.67
  14  -2 -10   12.00    2.38
  -2 -14 -10   15.85    2.39
  -2 -14  11    1.07    1.48
 -14   2  11    0.76    1.47
   2  14  11   -0.36    1.05
  -2 -14 -11    1.35    1.34
  14  -2 -11    0.91    2.14
  -2 -14  12    0.22    1.39
 -14   2  12    0.12    1.31
   2  14  12    0.13    0.96
  14  -2 -12   -0.08    1.96
  -2 -14 -12    0.19    1.94
   2  14  13    1.92    1.30
  -2 -14  13    0.61    3.14
  14  -2 -13    0.31    2.65
  -2 -14 -13    0.04    2.62
  -2 -14  14    2.43    2.13
   2  14  14    0.76    1.42
  14  -2 -14   -2.97    2.75
  -2 -14 -14    5.66    2.76
  -2 -14 -15    0.92    1.76
  -2 -15   0   -0.70    0.89
 -15   2   0    0.53    0.95
  15  -2   0   -0.41    0.67
 -15   2   0   -0.60    0.64
 -15   2   1    2.55    1.22
  -2 -15   1    2.30    1.18
 -15   2   1    2.22    0.70
  15  -2   1    1.98    0.97
  -2 -15  -1    3.21    1.17
 -15   2  -1    2.85    0.92
 -15   2  -1    2.84    1.11
  15  -2  -1    0.73    1.16
  -2 -15   2    1.26    1.11
 -15   2   2   -0.31    2.02
  15  -2   2    0.33    1.04
 -15   2   2    1.48    0.85
  -2 -15   2    3.08    1.20
 -15   2  -2    1.22    1.00
 -15   2  -2    1.54    0.94
  15  -2  -2    3.53    0.86
  -2 -15  -2    1.97    1.13
  -2 -15   3    1.37    1.00
 -15   2   3    1.25    1.16
  -2 -15   3    0.28    1.14
  15  -2   3    0.65    1.02
 -15   2   3    0.58    0.37
  -2 -15  -3    2.26    0.96
 -15   2  -3    1.40    0.92
  15  -2  -3    0.59    0.51
  -2 -15   4    4.95    1.56
   2  15   4    2.66    1.20
 -15   2   4    3.24    1.55
 -15   2   4    4.05    0.33
  -2 -15  -4    3.94    1.32
 -15   2  -4    4.25    1.38
   2  15   5    1.65    1.34
  -2 -15   5    0.57    1.09
 -15   2   5   -0.11    1.12
  -2 -15   5    0.19    0.30
  -2 -15  -5   -0.11    0.93
  -2 -15   6   21.11    2.74
  15  -2   6   18.59    2.73
 -15   2   6   21.27    2.78
   2  15   6   21.63    2.09
  -2 -15  -6   22.59    2.24
  15  -2  -6   21.97    2.56
 -15   2   7   12.75    2.43
   2  15   7   13.17    1.73
  -2 -15   7   12.55    2.41
  15  -2  -7   14.12    2.07
  -2 -15  -7   10.31    1.89
  -2 -15   8   12.45    3.92
 -15   2   8   12.10    3.47
   2  15   8   12.02    1.69
  15  -2  -8   10.50    3.27
  -2 -15  -8   12.09    1.93
 -15   2   9    1.34    1.56
  -2 -15   9    0.84    1.75
   2  15   9    2.02    1.88
  -2 -15  -9    2.64    1.44
  15  -2  -9    1.90    1.52
   2  15  10    0.42    1.03
  -2 -15  10    1.09    1.48
 -15   2  10    0.46    1.46
  15  -2 -10   -0.10    1.34
  -2 -15 -10    0.84    1.31
   2  15  11    1.47    1.00
 -15   2  11   -0.76    1.37
  -2 -15  11   -1.28    1.42
  -2 -15 -11   -0.41    1.31
  15  -2 -11    0.89    1.25
   2  15  12    0.03    1.13
 -15   2  12    1.33    1.41
  -2 -15  12    1.06    1.67
  15  -2 -12    0.28    1.45
  -2 -15 -12   -0.05    1.46
  -2 -15  13    1.28    1.89
   2  15  13    2.17    1.89
  -2 -15 -13   -0.04    1.57
  15  -2 -13   -0.16    1.56
   2  15  14    0.47    2.33
  -2 -15  14    0.32    2.25
  15  -2 -14   -5.05    1.73
  -2 -15 -14    0.49    1.86
  -2 -16   0   73.00    3.73
 -16   2   0   73.03    3.13
  16  -2   0   73.59    4.13
 -16   2   0   77.72    3.90
  -2 -16   1   16.54    2.01
 -16   2   1   16.67    2.10
 -16   2   1   15.83    1.27
  -2 -16   1   19.40    1.94
  16  -2   1   18.56    2.63
  16  -2  -1   15.23    1.28
 -16   2  -1   15.77    1.93
 -16   2  -1   14.25    1.54
  -2 -16  -1   16.27    1.98
  16  -2   2    9.79    1.40
 -16   2   2    5.43    2.68
  -2 -16   2    4.55    1.46
 -16   2   2    4.31    1.20
  -2 -16   2    6.75    2.44
 -16   2  -2    6.49    2.24
  16  -2  -2    4.27    1.12
  -2 -16  -2    5.08    1.46
 -16   2  -2    9.53    1.29
 -16   2   3   13.36    1.23
  -2 -16   3   12.24    2.06
  -2 -16   3   13.92    2.96
 -16   2   3   15.70    2.16
  16  -2  -3   14.76    1.02
 -16   2  -3   11.49    1.70
  -2 -16  -3   14.89    1.82
 -16   2  -3   11.62    1.77
  16  -2   4    4.73    1.61
  -2 -16   4    3.51    1.48
 -16   2   4    4.07    0.37
  -2 -16   4    3.92    1.68
 -16   2   4    4.54    1.67
  -2 -16  -4    4.14    1.41
 -16   2  -4    2.68    1.45
  -2 -16   5   26.24    0.75
 -16   2   5   27.05    2.98
  -2 -16   5   27.86    3.04
   2  16   5   29.11    2.33
  -2 -16  -5   27.30    2.53
   2  16   6    1.25    1.38
  -2 -16   6   -0.03    1.24
 -16   2   6    0.24    1.25
  -2 -16  -6    0.08    0.99
   2  16   7   -0.85    0.80
 -16   2   7   -0.51    1.69
  -2 -16   7   -0.75    1.20
  16  -2  -7    1.11    1.05
  -2 -16  -7    0.56    0.92
  -2 -16   8    1.86    2.84
   2  16   8    2.73    1.94
 -16   2   8    2.76    1.58
  16  -2  -8    1.28    1.59
  -2 -16  -8    2.21    1.42
 -16   2   9   17.16    2.57
  -2 -16   9   13.85    2.81
   2  16   9   13.04    1.98
  -2 -16  -9   17.74    2.42
  16  -2  -9   11.21    2.34
  -2 -16  10   -0.39    1.46
 -16   2  10   -1.29    1.47
   2  16  10   -0.18    0.98
  -2 -16 -10    0.57    1.28
  16  -2 -10   -1.38    1.92
   2  16  11   11.43    3.27
  -2 -16  11   15.60    3.05
 -16   2  11   13.21    4.05
  -2 -16 -11   18.53    2.79
  16  -2 -11    0.03    4.13
 -16   2  12    2.35    1.67
   2  16  12    2.05    1.34
  -2 -16  12    2.08    3.07
  -2 -16 -12    0.00    1.77
  16  -2 -12   -0.29    1.70
  -2 -16  13    1.79    2.08
   2  16  13    2.60    1.47
  -2 -16 -13    0.00    1.83
  16  -2 -13    0.75    1.76
  -2 -16  14    5.35    1.89
   2  16  14    0.87    1.20
  -2 -16 -14   -3.94    1.53
  16  -2 -14   -0.05    1.40
 -17   2   0   -0.37    0.59
  17  -2   0    0.41    0.59
  -2 -17   0    0.36    0.82
 -17   2   0   -0.27    0.86
  17  -2   1    1.05    1.00
  -2 -17   1    1.90    1.30
 -17   2   1    2.32    1.21
 -17   2   1    1.45    1.35
  -2 -17   1    3.00    1.25
 -17   2  -1    1.51    0.96
  -2 -17  -1    1.79    1.23
  17  -2  -1    2.45    0.79
 -17   2  -1    2.70    1.95
  -2 -17   2    4.20    1.67
 -17   2   2    6.08    1.71
  17  -2   2    5.94    1.38
 -17   2   2    4.36    0.82
  -2 -17   2    5.43    2.45
 -17   2  -2    3.54    1.29
 -17   2  -2    6.29    1.47
  17  -2  -2    6.43    0.75
  -2 -17  -2    4.28    1.51
 -17   2   3    3.64    0.92
  -2 -17   3    2.16    1.43
 -17   2   3    5.42    2.47
  -2 -17   3    2.91    2.40
 -17   2  -3    4.09    1.28
  17  -2  -3    1.94    0.74
  -2 -17  -3    2.56    1.35
 -17   2  -3    2.87    1.24
  -2 -17   4    0.30    1.05
 -17   2   4    0.45    0.43
  -2 -17   4   -0.67    1.22
 -17   2   4    1.42    1.21
  -2 -17  -4    0.88    1.03
  17  -2   5   19.40    2.52
  -2 -17   5   19.73    2.77
 -17   2   5   21.08    2.48
  -2 -17  -5   19.44    2.27
   2  17   6   31.30    2.41
 -17   2   6   30.65    3.08
  -2 -17   6   32.45    3.47
  -2 -17  -6   29.44    2.71
  -2 -17   7   -0.35    1.52
   2  17   7    0.51    1.57
 -17   2   7    0.36    1.33
  -2 -17  -7    1.34    1.11
 -17   2  -7    0.45    1.27
   2  17   8    3.04    1.20
 -17   2   8    1.51    1.62
  -2 -17   8    1.43    1.71
  -2 -17  -8    0.23    1.39
   2  17   9    2.38    1.31
  -2 -17   9    2.79    1.91
 -17   2   9    2.17    1.78
  17  -2  -9    1.21    1.61
  -2 -17  -9    3.82    1.65
  -2 -17  10    1.04    1.53
 -17   2  10    1.87    2.15
   2  17  10    0.58    1.07
  -2 -17 -10    0.10    1.33
  17  -2 -10   -1.06    1.25
   2  17  11    2.52    1.30
  -2 -17  11    2.11    1.92
 -17   2  11    1.04    1.65
  17  -2 -11   -0.86    1.62
  -2 -17 -11    0.06    1.69
  -2 -17  12    0.19    1.52
   2  17  12    0.42    1.02
 -17   2  12   -0.11    1.30
  -2 -17 -12    0.06    1.36
  17  -2 -12   -0.22    1.26
   2  17  13    2.94    1.43
  -2 -17  13    1.91    2.11
  -2 -17 -13   -0.02    1.79
  17  -2 -13   -0.47    1.72
 -18   2   0   14.34    2.13
  18  -2   0   13.05    2.22
 -18   2   0   14.50    2.02
  -2 -18   0   11.72    1.91
 -18   2   1   -0.67    1.06
  18  -2   1    0.34    1.26
  -2 -18   1   -0.08    1.02
  -2 -18   1    0.43    1.54
 -18   2   1    0.10    0.62
 -18   2  -1    0.19    1.00
 -18   2  -1    1.13    1.21
  18  -2  -1    0.14    0.93
  -2 -18  -1    1.12    0.95
 -18   2   2   74.66    2.97
  18  -2   2   64.58    3.61
  -2 -18   2   74.48    4.10
 -18   2   2   71.96    4.40
  -2 -18   2   70.51    4.36
 -18   2  -2   66.86    5.10
 -18   2  -2   73.19    4.04
  -2 -18  -2   67.24    3.90
  18  -2  -2   77.51    3.30
 -18   2   3    6.95    2.92
  -2 -18   3    4.40    1.67
  18  -2   3    3.89    1.55
  -2 -18   3    5.76    2.99
 -18   2   3    6.05    0.74
 -18   2  -3    4.84    1.52
  18  -2  -3    6.25    0.58
 -18   2  -3    4.97    2.33
  -2 -18  -3    4.80    1.56
  -2 -18   4    2.53    1.77
 -18   2   4    3.71    1.62
  -2 -18   4    1.92    2.26
  18  -2   4    4.99    1.50
 -18   2   4    3.21    0.67
  -2 -18  -4    3.42    1.41
 -18   2  -4    3.11    1.36
  -2 -18   5    1.37    0.36
  -2 -18   5    1.39    1.25
  -2 -18   5    1.76    1.59
 -18   2   5    1.04    1.42
  -2 -18  -5    1.07    1.26
  -2 -18   6   -1.08    1.44
 -18   2   6   -0.31    2.05
  -2 -18  -6   -1.59    1.11
 -18   2  -6    1.78    1.24
 -18   2   7    0.55    1.17
  -2 -18   7    1.64    2.08
   2  18   7   -0.23    0.86
  -2 -18  -7   -0.13    1.00
  -2 -18   8    9.01    2.51
 -18   2   8    8.07    2.35
   2  18   8    8.06    2.63
  -2 -18  -8    9.17    2.10
   2  18   9   -0.60    1.03
 -18   2   9   -0.25    1.44
  -2 -18   9   -0.48    1.55
  -2 -18  -9    0.04    1.32
  -2 -18  10   22.52    3.92
   2  18  10   22.33    2.71
 -18   2  10   20.41    5.02
  -2 -18 -10   27.16    3.41
 -18   2  11    0.10    1.40
   2  18  11   -0.13    1.07
  -2 -18  11   -0.69    2.49
  -2 -18 -11    0.05    2.19
  18  -2 -11   -0.31    1.33
  -2 -18  12    2.32    2.27
   2  18  12    5.01    2.39
 -18   2  12    3.22    2.00
  -2 -18 -12    0.13    3.23
  18  -2 -12    0.30    1.95
 -18   2  13    0.03    1.39
  -2 -18 -13    0.15    2.26
  -2 -19   0    0.94    1.08
 -19   2   0   -0.70    0.76
  -2 -19   0   -0.77    0.98
 -19   2   0    0.48    1.71
  19  -2   0    2.01    0.74
 -19   2   1    5.21    1.05
  -2 -19   1    5.41    1.64
 -19   2   1    4.71    1.65
  19  -2   1    5.12    1.26
  -2 -19   1    5.09    1.51
 -19   2  -1    4.87    1.63
  19  -2  -1    5.06    1.00
  -2 -19  -1    3.59    1.48
 -19   2  -1    6.02    1.96
 -19   2   2    2.84    1.30
  -2 -19   2    2.43    1.64
  -2 -19   2    2.86    1.39
 -19   2   2    2.47    1.62
  19  -2   2    2.45    1.30
 -19   2  -2    3.74    1.43
  -2 -19  -2    2.90    1.38
  19  -2  -2    2.67    0.72
 -19   2  -2    0.82    1.95
 -19   2   3    0.14    0.52
  19  -2   3    0.32    1.64
  -2 -19   3    0.98    1.05
  -2 -19   3   -0.66    1.33
 -19   2   3   -0.16    1.89
 -19   2  -3    1.20    1.05
  -2 -19  -3    0.17    1.00
  19  -2  -3    0.48    0.37
 -19   2  -3    0.49    0.99
 -19   2   4    1.30    0.38
 -19   2   4    4.16    1.42
  -2 -19   4    0.26    1.28
  19  -2   4    1.88    1.30
  -2 -19   4    2.86    2.44
 -19   2  -4    0.90    1.14
  -2 -19  -4    0.17    1.21
  -2 -19   5    6.13    2.16
  -2 -19   5    6.88    0.56
  -2 -19   5    8.15    1.77
 -19   2   5    6.59    2.09
  -2 -19  -5    7.36    1.77
 -19   2  -5    5.81    1.84
  -2 -19   6   29.67    2.92
 -19   2   6   29.14    5.07
  -2 -19   6   31.02    3.65
  -2 -19  -6   27.25    2.75
 -19   2  -6   30.80    3.11
  -2 -19   7    1.73    1.93
 -19   2   7    1.97    1.65
  -2 -19  -7    1.95    1.46
  -2 -19   8   -0.05    1.76
 -19   2   8    0.00    1.65
   2  19   8    2.02    1.17
  -2 -19  -8    0.08    2.24
   2  19   9    1.51    1.35
 -19   2   9    2.80    1.93
  -2 -19   9    2.32    2.01
  -2 -19  -9    0.04    2.72
   2  19  10    4.76    2.48
 -19   2  10    3.34    2.08
  -2 -19  10    3.26    2.39
  -2 -19 -10    0.40    3.27
  -2 -19  11   -1.41    2.95
   2  19  11   -0.82    1.21
 -19   2  11   -0.17    1.66
  -2 -19 -11   -0.05    2.55
   2  19  12    0.67    1.22
 -19   2  12    0.53    1.59
  -2 -19  12    0.21    1.82
  -2 -19 -12   -0.21    1.58
  20  -2   0    1.26    0.88
 -20   2   0    1.30    1.31
 -20   2   0    0.83    0.93
  -2 -20   0    0.42    1.29
  -2 -20   0    2.06    1.93
 -20   2   1    0.05    2.17
 -20   2   1   11.88    1.40
  20  -2   1   13.65    1.64
  -2 -20   1    9.04    1.95
  -2 -20  -1    8.77    1.87
 -20   2  -1   15.92    2.08
  20  -2  -1   11.96    1.93
 -20   2  -1   12.75    1.62
  20  -2   2    0.58    1.36
 -20   2   2    0.20    1.09
  -2 -20   2   -1.36    1.12
 -20   2   2    1.05    0.56
  -2 -20   2    0.24    0.97
  -2 -20  -2    1.18    0.91
  20  -2  -2   -0.49    0.49
 -20   2  -2   -0.67    0.79
 -20   2   3   -0.20    3.81
 -20   2   3   15.73    1.66
  -2 -20   3   14.62    2.53
  20  -2   3   14.34    2.17
  -2 -20  -3   14.19    2.05
 -20   2  -3   15.93    2.08
 -20   2  -3   13.63    1.95
  20  -2  -3   13.86    1.30
  -2 -20   4    2.35    2.69
  -2 -20   4    0.96    0.63
  -2 -20   4    3.89    1.39
 -20   2   4    0.04    1.59
  20  -2   4    2.77    2.18
 -20   2   4    1.34    0.42
 -20   2  -4    0.84    2.03
  -2 -20  -4    2.46    1.37
 -20   2  -4    3.47    1.28
 -20   2   5    1.48    1.09
  -2 -20   5   -0.14    1.17
  -2 -20   5   -2.92    1.55
  -2 -20   5   -0.06    0.39
 -20   2  -5    0.61    0.97
 -20   2  -5    0.79    0.85
  -2 -20  -5   -0.92    0.94
  -2 -20   6   -0.35    1.01
  -2 -20   6    0.01    1.26
 -20   2   6    0.71    1.87
  -2 -20  -6   -0.05    1.02
 -20   2   7   -0.18    1.60
  -2 -20   7    1.27    1.71
  -2 -20   7    1.61    1.39
  -2 -20  -7   -0.19    2.10
 -20   2   8    2.14    1.55
  -2 -20   8   -1.20    1.66
  -2 -20  -8   -0.15    2.06
   2  20   9    4.25    1.61
  -2 -20   9    3.73    2.39
 -20   2   9    5.46    3.66
  -2 -20  -9    0.04    3.11
 -20   2  10    3.53    1.93
  -2 -20  10    2.69    2.16
   2  20  10    1.46    1.42
  -2 -20 -10   -0.02    1.94
 -20   2  11    1.06    1.86
  -2 -20  11   -0.22    2.05
   2  20  11    1.76    1.32
  -2 -20 -11    0.09    1.78
  21  -2   0    0.59    0.80
  -2 -21   0    0.34    1.16
 -21   2   0    0.06    0.89
  -2 -21   0    1.55    1.17
 -21   2   0    0.32    1.31
  -2 -21   1    7.52    1.96
  -2 -21   1    8.95    1.89
 -21   2   1   10.73    2.06
  21  -2   1    7.07    1.50
 -21   2  -1    7.01    1.59
 -21   2  -1    0.19    1.96
  21  -2  -1    8.44    1.16
  21  -2   2    4.74    1.47
 -21   2   2    6.27    1.02
 -21   2   2    0.25    1.90
  -2 -21   2    6.17    1.80
  -2 -21  -2    3.61    1.58
 -21   2  -2    2.16    1.42
  21  -2  -2    4.89    1.30
 -21   2  -2   -0.11    1.72
 -21   2   3    0.98    0.65
  -2 -21   3    0.51    1.30
  -2 -21   3    1.19    0.76
  -2 -21   3    1.32    1.52
 -21   2   3    0.14    1.51
  21  -2   3    3.25    2.12
  -2 -21  -3    0.11    1.32
  21  -2  -3    1.53    0.49
 -21   2  -3    1.56    1.20
 -21   2  -3    0.17    1.36
  21  -2   4   14.00    2.17
  -2 -21   4   11.61    1.50
  -2 -21   4   -0.03    2.48
 -21   2   4   10.36    1.05
 -21   2   4   -0.09    2.35
  -2 -21   4   11.98    2.07
  -2 -21  -4   12.57    2.06
 -21   2  -4    7.20    1.89
 -21   2  -4   -0.02    2.00
 -21   2   5   11.44    2.31
  -2 -21   5   11.77    2.07
  -2 -21   5    0.00    2.59
  21  -2   5   10.72    3.44
  -2 -21  -5    8.94    2.13
 -21   2  -5   13.34    1.96
 -21   2  -5    7.61    1.90
  -2 -21   6   -0.13    1.53
  -2 -21   6    1.53    1.83
 -21   2   6    1.73    2.09
  -2 -21  -6   -0.02    1.20
 -21   2  -6   -0.05    1.08
 -21   2   7    0.67    1.83
  -2 -21   7    1.04    2.04
  -2 -21   7    2.47    1.56
  -2 -21  -7    0.20    2.47
  -2 -21   8    0.05    1.37
  -2 -21   8    0.02    1.64
 -21   2   8    1.11    1.62
  -2 -21  -8    0.11    2.11
  -2 -21   9   -0.42    1.54
 -21   2   9    0.46    2.33
  -2 -21  -9    0.03    1.26
  -2 -21  10    1.77    1.84
 -21   2  10   -0.73    1.64
  -2 -21 -10    0.24    1.55
  -2 -22   0    0.01    1.23
 -22   2   0    0.07    1.38
  22  -2   0    0.66    0.85
 -22   2   0    1.93    1.52
  22  -2   1    1.08    0.96
  -2 -22   1   -0.16    1.22
 -22   2   1    0.34    0.85
  -2 -22   1   -0.05    1.29
  22  -2  -1    0.77    1.11
 -22   2  -1   -0.02    1.59
  -2 -22  -1    0.78    1.23
  -2 -22  -1    0.41    1.17
  -2 -22   2    0.47    1.15
  -2 -22   2    6.96    1.70
 -22   2   2    5.45    1.63
 -22   2   2    0.45    1.98
  22  -2   2    3.67    2.30
 -22   2  -2    0.13    1.82
  22  -2  -2    5.20    0.86
 -22   2  -2    3.66    1.58
  -2 -22  -2    5.90    1.67
  -2 -22   3    1.41    1.29
  -2 -22   3    1.35    0.81
  -2 -22   3    0.01    1.64
 -22   2   3   -0.02    1.51
 -22   2   3    1.84    1.10
  22  -2   3    0.42    1.29
 -22   2  -3    1.34    1.23
  -2 -22  -3    2.11    1.38
  22  -2  -3    1.01    0.48
 -22   2   4   -0.11    1.12
  -2 -22   4    0.11    1.27
  22  -2   4   -0.58    1.10
  -2 -22   4   -0.34    0.43
 -22   2  -4    1.12    0.89
  -2 -22  -4    0.54    1.02
 -22   2  -4    0.04    1.00
  22  -2   5   -0.77    1.12
 -22   2   5   -0.71    1.21
  -2 -22   5    0.08    2.07
  -2 -22   5    0.95    1.03
 -22   2  -5    0.04    1.45
 -22   2  -5   -0.05    1.69
  -2 -22  -5    0.50    1.07
  22  -2   6    1.83    1.59
  -2 -22   6    0.07    1.70
 -22   2   6    1.17    2.60
  -2 -22   6    1.84    1.35
 -22   2  -6    0.01    1.29
  -2 -22  -6    0.09    1.42
 -22   2  -6   -0.07    1.96
  -2 -22   7    1.04    1.43
  -2 -22   7    0.74    1.97
 -22   2   7    1.72    1.74
 -22   2  -7   -0.05    1.27
  -2 -22   8   -0.07    2.11
  -2 -22   8    1.72    1.74
 -22   2   8    4.61    2.08
  -2 -22  -8    0.07    1.73
  -2 -22   9   -1.31    1.95
  -2 -22   9   -0.44    1.55
 -22   2   9   -0.58    2.95
  -2 -22  -9   -0.06    1.62
  23  -2   0   -0.49    1.16
  -2 -23   0    0.41    0.97
 -23   2   0   -0.22    1.11
 -23   2   0   -0.19    0.85
  -2 -23   1   -0.16    1.31
 -23   2   1   -0.24    0.88
  23  -2   1    1.12    1.49
  -2 -23   1   -0.85    0.98
 -23   2   1   -0.04    1.25
 -23   2  -1   -0.42    1.05
  -2 -23  -1    3.31    1.25
  23  -2  -1    0.99    0.71
  -2 -23  -1    0.02    1.20
  23  -2   2    0.14    1.04
 -23   2   2   -0.06    0.76
  -2 -23   2    0.66    1.08
  -2 -23   2   -0.04    1.41
 -23   2   2   -0.03    1.26
  -2 -23   2    0.64    0.85
 -23   2  -2   -0.19    1.06
  23  -2  -2    0.66    0.89
 -23   2  -2    1.13    1.73
 -23   2   3   -0.30    1.85
  -2 -23   3    0.13    1.94
  -2 -23   3    2.60    1.45
  23  -2   3    3.15    1.54
  23  -2  -3    2.32    0.89
  -2 -23  -3    4.35    1.34
 -23   2  -3    3.86    2.59
  -2 -23   4   -0.75    1.16
  -2 -23   4    0.11    1.42
  23  -2   4    0.81    1.15
 -23   2   4    0.02    2.11
 -23   2  -4    0.01    1.61
  -2 -23  -4    0.65    0.97
 -23   2  -4    0.05    0.95
  -2 -23   5    2.86    2.30
  23  -2   5    1.97    2.31
 -23   2   5    3.39    1.77
  -2 -23   5   -0.13    3.26
 -23   2  -5    0.16    2.03
 -23   2  -5    0.00    1.45
  -2 -23  -5   -0.14    1.52
  23  -2   6   -0.01    1.75
  -2 -23   6    4.59    1.58
 -23   2   6    6.53    2.93
  -2 -23   6    0.16    2.23
  -2 -23  -6   -0.02    1.63
 -23   2  -6   -0.06    1.38
 -23   2  -6   -0.05    2.30
  -2 -23   7    1.95    1.93
  -2 -23   7    1.87    1.35
  23  -2   7    0.34    1.51
 -23   2   7   -0.88    1.71
 -23   2  -7   -0.62    1.26
 -23   2  -7   -0.05    1.24
  -2 -23   8   -0.57    2.99
 -23   2   8    1.95    2.00
  -2 -23   8    1.13    1.56
  -2 -23  -8    0.04    1.58
 -23   2  -8   -0.08    1.30
  -2 -24   0    4.53    1.56
  24  -2   0    3.60    1.15
 -24   2   0    2.21    1.38
  -2 -24   0    0.21    1.74
 -24   2   1    0.36    1.64
 -24   2   1    1.30    1.80
  24  -2   1    1.69    1.19
  -2 -24   1    2.44    1.42
  -2 -24   1    2.04    1.22
 -24   2  -1    0.07    1.55
  24  -2  -1    1.24    0.87
  -2 -24  -1    0.33    1.42
  -2 -24  -1    2.16    1.25
 -24   2  -1    1.84    1.30
  24  -2   2    1.95    1.30
  -2 -24   2    1.23    1.47
  -2 -24   2    1.48    1.71
  -2 -24   2   -0.38    1.97
  24  -2  -2    1.82    0.71
  -2 -24  -2    3.18    1.31
 -24   2  -2    2.24    1.40
  -2 -24  -2   -0.20    1.64
 -24   2   3   -0.09    1.45
  24  -2   3   -0.70    1.13
 -24   2  -3   -0.42    1.30
 -24   2  -3    0.09    1.10
  -2 -24  -3   -0.71    1.69
  -2 -24   4    0.05    1.94
  -2 -24   4    2.30    1.46
  24  -2   4    0.75    1.36
 -24   2   4    0.18    2.81
 -24   2  -4   -0.02    1.53
  -2 -24  -4    1.36    1.23
  -2 -24   5    0.28    1.54
  24  -2   5   -0.04    1.08
 -24   2   5    0.83    1.30
  -2 -24   5   -1.56    1.13
 -24   2  -5   -0.04    1.11
 -24   2  -5    0.56    0.99
  -2 -24  -5   -0.02    1.15
  -2 -24   6   -0.12    2.00
  -2 -24   6   -0.84    1.42
 -24   2   6   -2.18    1.73
  24  -2   6   -0.31    2.38
  -2 -24  -6   -0.22    1.50
 -24   2  -6    0.04    1.40
 -24   2  -6   -0.02    1.39
  24  -2   7   -0.14    1.41
  -2 -24   7    0.37    1.88
 -24   2   7    1.20    1.73
  -2 -24   7   -0.47    1.47
 -24   2  -7   -0.06    1.83
 -24   2  -7    0.10    1.25
  -2 -25   0    0.82    1.19
  25  -2   0   -0.41    1.36
 -25   2   0    1.24    1.67
  -2 -25   0   -0.29    1.48
 -25   2   1   -0.64    0.97
  -2 -25   1    0.23    1.56
 -25   2   1    0.15    1.35
  -2 -25   1    1.14    1.21
 -25   2  -1    0.13    1.29
  25  -2  -1    0.40    0.68
 -25   2  -1    0.33    1.08
  -2 -25  -1   -0.34    1.25
  -2 -25  -1    0.56    1.05
 -25   2   2    0.26    2.55
  25  -2   2    1.94    1.21
  -2 -25   2    0.22    1.83
  -2 -25  -2    0.18    1.50
  -2 -25  -2    0.26    1.25
 -25   2  -2    0.56    1.36
 -25   2   3    0.33    1.83
  25  -2   3    1.77    1.36
  -2 -25   3    0.24    2.11
  -2 -25   3    2.08    1.46
 -25   2  -3    2.27    1.60
 -25   2  -3    0.23    1.36
  25  -2   4    0.00    2.40
 -25   2   4   -0.01    1.91
  -2 -25   4   -0.46    2.17
 -25   2  -4    0.09    1.74
  -2 -25  -4    4.97    1.42
 -25   2  -4   -0.15    1.43
  25  -2   5   -0.25    1.08
 -25   2   5    0.26    1.46
  -2 -25   5   -0.04    1.56
  -2 -25   5    0.07    1.25
  -2 -25  -5    0.09    1.20
 -25   2  -5    0.04    1.84
 -25   2  -5    0.04    1.10
  -2 -25   6   -0.19    3.37
 -25   2   6    2.11    2.02
  25  -2   6   -0.06    1.51
  -2 -25   6    1.54    1.70
  -2 -25  -6    0.21    1.63
 -25   2  -6   -0.05    1.47
 -25   2  -6    0.19    1.45
  -2 -26   0    5.97    3.27
  26  -2   0   12.17    1.66
 -26   2   0    6.29    2.15
  -2 -26   0   12.03    2.39
  -2 -26   1   -1.16    1.23
  26  -2   1    0.28    0.96
  -2 -26   1   -0.19    1.61
  -2 -26   1    1.15    0.93
 -26   2   1   -0.05    1.41
  -2 -26  -1   -0.20    1.25
  -2 -26  -1   -0.30    1.43
 -26   2  -1    0.92    1.75
 -26   2   2    0.34    2.44
  26  -2   2    3.66    1.54
 -26   2  -2    3.29    2.73
  -2 -26  -2    4.12    1.63
  -2 -26  -2    0.10    1.97
  -2 -26  -2    4.39    1.85
 -26   2  -2    0.11    1.72
  -2 -26   3   -0.23    1.47
  26  -2   3   -0.71    1.43
  -2 -26   3   -0.63    1.21
 -26   2   3   -0.18    1.46
  -2 -26  -3   -0.03    1.21
  -2 -26  -3   -0.08    1.11
 -26   2  -3    1.91    1.06
  -2 -26  -3   -0.58    0.95
 -26   2  -4    0.21    1.90
  -2 -26  -4    1.57    1.89
 -26   2  -4    1.30    1.65
   3   0   1  429.50   10.25
  -3   0   1  434.19    9.89
   0   3   1  441.81    9.29
   0  -3   1  425.14    9.38
  -3   0   1  454.04    8.54
   0  -3  -1  418.19    8.82
  -3   0  -1  441.31    9.94
   3   0  -1  428.01    9.29
   3   0  -1  447.04    8.29
   0   3  -1  440.73    9.54
   0  -3   2  559.45   10.80
   0   3   2  553.82   12.83
   0  -3   2  548.36   13.38
   3   0   2  537.45   14.81
  -3   0   2  590.84   12.17
  -3   0   2  555.41   13.34
   0  -3  -2  562.06   13.07
  -3   0  -2  552.04   13.93
   0   3  -2  545.96   14.04
   3   0  -2  534.48   12.84
   3   0   3   65.94    2.46
   0  -3   3   64.25    2.20
  -3   0   3   70.22    1.85
  -3   0   3   66.36    2.21
   0   3   3   63.11    1.97
  -3   0  -3   64.90    2.41
   3   0  -3   66.06    1.57
   0   3  -3   69.01    1.44
   0  -3  -3   67.68    2.05
   0   3  -3   65.24    2.12
   3   0  -3   63.65    2.80
  -3   0   4   14.87    1.08
   3   0   4   14.51    1.23
  -3   0   4   14.30    0.65
   0   3   4   14.73    1.00
   0  -3   4   14.63    1.12
   0  -3  -4   15.08    0.99
   0   3  -4   15.63    0.80
   3   0  -4   15.31    0.89
   3   0  -4   14.56    1.57
   0   3  -4   14.27    1.06
  -3   0  -4   13.90    1.23
  -3   0   5   93.67    2.95
   0   3   5   93.92    3.61
   0  -3   5   93.81    3.06
  -3   0   5   91.35    2.33
   3   0   5   90.99    3.18
  -3   0  -5   88.92    3.14
   0  -3  -5   95.76    2.83
   3   0  -5   93.07    2.27
   0   3  -5   94.63    2.15
   3   0  -5   90.79    2.78
   0   3  -5   91.77    3.73
  -3   0   6  149.87    3.88
   3   0   6  146.91    4.84
   0   3   6  146.44    4.20
   0  -3   6  153.65    4.80
   0   3  -6  152.14    4.27
   3   0  -6  146.82    5.30
   0  -3  -6  155.75    4.43
   0   3  -6  154.35    4.63
  -3   0  -6  146.23    4.76
   3   0  -6  146.11    4.33
   3   0   7   63.22    2.84
   0   3   7   56.55    2.30
  -3   0   7   62.42    2.81
   0  -3   7   57.98    2.66
   0   3  -7   62.23    2.57
   0  -3  -7   60.10    2.38
   0   3  -7   60.44    1.91
   3   0  -7   58.51    2.60
   3   0  -7   60.48    2.48
  -3   0  -7   59.12    2.71
   0  -3   8   40.08    2.48
   0   3   8   39.88    2.93
  -3   0   8   38.65    1.86
   3   0   8   46.34    3.85
   0   3  -8   42.77    1.71
   3   0  -8   40.71    2.18
   0  -3  -8   40.75    2.13
   0   3  -8   41.16    2.27
  -3   0  -8   44.04    2.49
   3   0  -8   40.14    2.43
   0  -3   9    2.39    1.21
   3   0   9    2.13    1.31
   0   3   9    3.42    1.67
  -3   0   9    2.75    0.88
   0   3  -9    3.01    0.80
   3   0  -9    2.09    0.80
   0  -3  -9    2.59    1.01
   0   3  -9    2.07    1.11
   3   0  -9    3.11    1.09
   0   3  10   28.86    3.23
   0  -3  10   30.44    2.54
  -3   0  10   30.89    2.03
   3   0  10   30.16    2.77
   3   0 -10   30.05    1.91
   0   3 -10   30.05    2.29
  -3   0 -10   31.35    2.61
   3   0 -10   31.74    3.42
   0  -3 -10   35.64    2.74
  -3   0  11    2.65    1.11
   0  -3  11    3.31    2.35
   3   0  11    1.91    2.63
   0   3  11    2.89    1.20
   0   3 -11    3.25    0.97
   3   0 -11    0.07    1.96
   0   3 -11    2.96    1.94
   3   0 -11    3.16    0.94
   0  -3 -11    3.06    1.14
  -3   0  12    5.04    1.22
   0  -3  12    6.37    1.58
   0   3  12    5.08    1.34
   0   3 -12    4.96    1.30
   3   0 -12   -0.35    1.37
   3   0 -12    3.61    1.68
   0   3 -12   -0.03    1.09
   0  -3 -12    5.95    1.26
   0  -3  13    0.31    1.14
  -3   0  13    0.17    0.92
   3   0  13    0.57    1.18
   0   3  13    1.01    0.99
   0  -3 -13    0.78    1.50
   0  -3 -13   -0.05    1.18
   0   3 -13    0.92    0.93
   3   0 -13    0.14    0.79
  -3   0 -13    0.13    1.04
   3   0 -13    0.01    0.97
   3   0  14    1.19    2.29
  -3   0  14    1.63    1.12
   0   3  14    2.21    1.97
   0  -3  14    2.60    1.41
   3   0 -14    1.20    0.98
  -3   0 -14   -0.07    1.88
   0   3 -14    0.90    1.11
   0   3 -14    0.03    0.98
   0  -3 -14    0.67    1.13
   0  -3  15    2.49    1.70
   3   0  15    2.75    1.68
  -3   0  15    1.38    1.30
   0   3  15    1.54    1.39
   3   0 -15    1.79    1.42
  -3   0 -15    3.50    1.40
   0   3 -15    2.32    2.09
   3   0 -15    1.93    1.77
   0  -3 -15    0.90    2.07
   3   0  16   -0.13    1.38
  -3   0  16    0.13    1.06
   0  -3  16    0.25    1.39
   0   3  16    1.45    1.12
   0   3 -16    0.07    0.93
   3   0 -16   -0.51    1.10
   3   0 -16    0.41    0.93
   0  -3 -16    1.73    1.07
  -3   0 -16   -0.02    1.89
   0   3 -16   -1.07    1.09
   0  -3  17    3.81    1.73
   0   3  17    0.07    2.31
  -3   0  17    0.60    1.38
   3   0  17    0.67    2.69
   0   3 -17    0.10    1.19
   0   3 -17    0.63    1.39
   0  -3 -17    3.04    2.13
   3   0 -17   -0.49    1.80
   3   0 -17   -0.51    2.10
  -3   0 -17    2.82    1.49
   1  -3   0  508.52   11.00
   3   1   0  509.92   11.00
   1  -3   0  521.65   11.24
  -3  -1   0  515.51   11.16
  -3  -1   1  893.10   21.89
  -3  -1   1  934.66   21.79
   1  -3   1  947.66   21.30
   3   1   1  926.61   23.61
  -1   3   1  917.24   21.83
   1  -3   1  902.79   23.55
   3   1  -1  924.61   21.86
  -3  -1  -1  939.06   24.74
   1  -3  -1  875.05   20.82
  -1   3  -1  918.12   23.03
  -3  -1   2 1256.77   34.21
   3   1   2 1215.51   34.87
  -1   3   2 1241.18   32.56
   1  -3   2 1257.35   35.64
  -3  -1   2 1280.57   33.36
   1  -3  -2 1278.58   33.67
  -3  -1  -2 1258.18   35.99
  -1   3  -2 1238.52   34.82
   3   1  -2 1220.85   33.18
   3   1   3  198.62    5.60
  -3  -1   3  199.85    4.72
   1  -3   3  200.84    6.63
  -1   3   3  195.00    5.18
  -3  -1   3  201.44    4.91
   3   1  -3  197.15    3.99
   1  -3  -3  204.26    4.60
   3   1  -3  195.74    4.64
  -3  -1  -3  201.28    5.54
  -1   3  -3  197.18    5.21
   3   1   4    4.78    0.90
   1  -3   4    4.73    0.85
  -1   3   4    4.18    0.59
  -3  -1   4    4.40    0.51
  -3  -1   4    4.20    0.70
  -1   3  -4    3.99    0.78
   1  -3  -4    4.48    0.96
  -3  -1  -4    4.01    0.86
   3   1  -4    5.07    1.00
   3   1  -4    3.55    0.45
  -1   3   5   10.31    1.23
  -3  -1   5    9.90    1.47
  -3  -1   5   11.13    0.75
   3   1   5   13.07    1.83
   1  -3   5   10.95    1.15
   3   1  -5   10.44    1.02
  -3  -1  -5   11.19    1.16
   1  -3  -5   11.56    0.85
  -1   3  -5   10.31    1.06
   3   1  -5   10.61    0.86
  -1   3   6    6.47    0.76
   1  -3   6    6.09    1.07
  -3  -1   6    6.99    0.73
   3   1   6    6.78    1.73
   3   1  -6    5.08    0.82
  -3  -1  -6    6.12    1.08
   1  -3  -6    6.33    0.75
  -1   3  -6    6.49    1.57
   3   1  -6    4.83    0.64
  -1   3  -6    4.65    0.59
   3   1   7   11.51    2.19
  -1   3   7    9.09    0.99
   1  -3   7    9.11    1.37
  -3  -1   7    9.93    0.99
   1  -3  -7    9.90    0.99
  -1   3  -7    8.83    2.04
   1  -3  -7   10.42    1.42
  -3  -1  -7   10.60    1.37
   3   1  -7   10.72    0.87
   3   1  -7   10.22    1.04
   1  -3   8  103.52    4.37
  -1   3   8  102.88    4.59
  -3  -1   8   98.75    3.40
  -1   3  -8  106.90    4.09
   3   1  -8  107.32    3.45
  -3  -1  -8  102.57    4.22
  -1   3  -8  101.03    5.38
   1  -3  -8  106.30    4.63
   1  -3  -8  101.63    4.34
   3   1  -8  103.20    3.66
   3   1   9   20.01    2.08
  -3  -1   9   16.27    2.41
   1  -3   9   19.20    2.10
  -1   3   9   20.46    2.40
   1  -3  -9   20.90    1.55
   3   1  -9   18.55    1.61
  -1   3  -9   18.74    1.38
   3   1  -9   18.48    1.41
  -1   3  -9   16.36    1.84
  -1   3  10    6.78    1.28
  -3  -1  10    6.54    1.28
   3   1  10    7.36    1.62
   1  -3  10    8.17    1.64
  -3  -1 -10    6.54    1.54
   3   1 -10    6.77    1.08
  -1   3 -10    7.10    1.46
   1  -3 -10    7.64    1.20
  -3  -1  11   87.55    3.91
  -1   3  11   85.35    3.89
   1  -3  11   88.33    4.86
   3   1  11   90.11    4.71
   1  -3 -11   83.86    3.72
  -1   3 -11   84.84    4.26
   3   1 -11   89.21    3.91
  -1   3 -11   90.85    3.69
   3   1 -11   88.53    3.65
   1  -3 -11   92.61    4.88
   1  -3  12   16.53    2.36
  -1   3  12   17.83    1.81
  -3  -1  12   16.47    1.83
   3   1 -12   15.45    1.81
  -3  -1 -12   14.65    2.02
   3   1 -12   15.48    1.64
   1  -3 -12   13.45    1.74
  -1   3 -12   16.19    1.63
  -1   3 -12   14.61    1.97
   1  -3  13    5.74    1.79
  -3  -1  13    5.03    1.45
  -1   3  13    5.28    1.42
  -3  -1 -13    3.27    2.37
  -1   3 -13    5.63    2.28
   3   1 -13    4.79    1.95
   1  -3 -13    5.20    1.33
   3   1 -13    5.01    2.22
   3   1  14    0.69    1.09
   1  -3  14   -0.93    1.93
  -3  -1  14    0.09    1.46
  -1   3 -14   -0.04    0.78
   1  -3 -14   -1.30    1.34
  -3  -1 -14    0.17    0.96
   3   1 -14   -0.11    0.90
   3   1 -14    0.16    0.77
  -1   3 -14   -0.95    0.94
   3   1  15    1.83    2.13
  -1   3  15    0.57    1.03
   1  -3  15    0.74    1.30
  -3  -1  15    0.80    1.10
   3   1 -15   -0.44    1.06
  -1   3 -15   -0.03    1.07
  -3  -1 -15   -0.52    1.88
   1  -3 -15    0.26    0.95
   3   1 -15    0.96    0.91
   3   1  16    3.24    1.61
  -1   3  16   -0.15    1.26
  -3  -1  16    0.16    2.09
   1  -3  16    4.10    2.72
   3   1 -16    1.04    1.97
  -3  -1 -16   -0.11    1.44
   3   1 -16    1.01    1.79
   1  -3 -16    1.72    1.88
   1  -3  17   -0.70    1.51
  -1   3  17   -0.05    1.86
   3   1  17   -1.86    1.44
  -3  -1  17   -0.12    1.21
  -1   3 -17    0.16    0.99
   1  -3 -17    0.10    1.10
  -1   3 -17   -1.23    1.15
  -3  -1 -17    0.23    1.86
   3   1 -17    0.06    1.06
   3   1 -17    0.12    0.98
  -2   3   0    0.30    0.23
   2  -3   0    0.31    0.39
   2  -3   0    0.32    0.22
  -2   3   0    0.16    0.23
  -3  -2   0   -0.02    0.28
   3   2   0    0.27    0.26
  -2   3   1  218.84    5.60
   2  -3   1  216.78    4.03
   3   2   1  213.42    5.45
  -3  -2   1  214.21    4.60
   2  -3   1  217.14    5.43
  -2   3  -1  215.04    4.69
  -3  -2  -1  213.61    4.84
  -2   3  -1  208.74    3.71
   2  -3  -1  219.07    3.95
   3   2  -1  211.40    4.13
   2  -3  -1  219.11    4.94
  -2   3   2  537.35   11.26
  -3  -2   2  464.09   10.68
   2  -3   2  529.63   14.59
   3   2   2  540.37   15.27
  -3  -2   2  513.43   11.77
  -3  -2  -2  526.85   14.90
   2  -3  -2  543.00   11.52
  -2   3  -2  541.74   14.81
   3   2  -2  514.07   11.78
   2  -3  -2  531.04   13.72
   3   2   3 1581.56   49.55
  -3  -2   3 1598.33   48.44
  -2   3   3 1569.56   44.18
   2  -3   3 1606.79   50.72
  -3  -2   3 1574.08   47.08
   3   2  -3 1559.85   45.41
   3   2  -3 1618.15   46.43
  -3  -2  -3 1603.72   50.16
   2  -3  -3 1590.03   50.33
  -2   3  -3 1588.41   49.12
   2  -3  -3 1641.04   46.47
  -2   3   4    0.97    0.37
   3   2   4    0.93    0.71
  -3  -2   4    1.46    0.50
   2  -3   4    1.72    0.74
  -3  -2   4    1.40    0.47
  -2   3  -4    0.91    0.69
  -3  -2  -4    0.68    1.17
   3   2  -4    1.64    0.40
   3   2  -4    1.55    0.44
   2  -3  -4    1.17    1.20
   2  -3  -4    0.81    0.39
  -3  -2   5   42.86    1.53
  -2   3   5   42.91    1.36
  -3  -2   5   41.67    1.58
   3   2   5   41.40    1.96
   2  -3   5   42.28    2.97
   2  -3  -5   43.63    1.39
   3   2  -5   40.43    1.42
  -2   3  -5   43.25    1.98
   3   2  -5   44.47    1.43
  -3  -2  -5   41.24    1.99
   2  -3  -5   45.14    3.02
  -2   3   6   22.39    1.09
   2  -3   6   22.46    1.74
  -3  -2   6   24.59    1.28
  -3  -2   6   24.73    1.83
   3   2   6   20.07    1.60
   2  -3  -6   23.37    2.55
   3   2  -6   22.10    1.16
  -3  -2  -6   24.39    2.47
   2  -3  -6   22.14    1.11
   3   2  -6   21.28    1.10
  -2   3  -6   22.39    1.57
   3   2   7    6.85    2.00
  -2   3   7    9.60    0.89
  -3  -2   7    8.54    1.52
   2  -3   7    9.43    1.40
   2  -3  -7    8.53    0.87
   2  -3  -7    9.39    1.40
  -2   3  -7    8.09    1.26
   3   2  -7    7.32    0.85
   3   2  -7    7.93    0.89
  -3  -2  -7   10.74    1.30
  -3  -2   8  158.58    6.19
  -2   3   8  153.17    4.61
   2  -3   8  160.90    7.83
  -2   3  -8  155.32    5.65
  -3  -2  -8  162.51    5.84
   2  -3  -8  152.65    5.85
   3   2  -8  156.64    5.77
   2  -3  -8  157.64    4.75
   3   2  -8  163.31    5.84
  -3  -2   9   31.56    2.96
   2  -3   9   30.97    2.57
   3   2   9   31.33    2.38
  -2   3   9   30.79    2.62
   2  -3  -9   31.14    2.51
   3   2  -9   29.75    2.55
  -2   3  -9   31.05    2.38
   2  -3  -9   31.73    1.74
  -2   3  -9   31.09    1.70
   3   2  -9   29.36    2.66
  -2   3  10    5.55    1.09
  -3  -2  10    3.52    1.22
   3   2  10    3.90    1.51
   2  -3  10    5.49    2.59
  -2   3 -10    4.88    1.07
   2  -3 -10    5.47    1.68
   3   2 -10    4.77    1.60
   3   2 -10    3.76    1.74
  -2   3 -10    4.24    2.26
   2  -3  11    0.05    1.24
  -3  -2  11    1.00    0.91
  -2   3  11    0.58    0.81
   3   2  11    0.72    1.12
   3   2 -11   -0.50    0.81
   2  -3 -11    1.14    0.76
  -3  -2 -11    0.40    1.05
  -2   3 -11    1.35    1.02
   3   2 -11    0.03    0.76
  -2   3 -11    0.31    0.80
  -2   3  12    1.90    1.08
   2  -3  12    1.36    2.52
  -3  -2  12    3.43    1.96
   3   2  12    2.98    1.49
   3   2 -12    3.47    1.04
   2  -3 -12    1.89    1.53
  -2   3 -12    2.60    1.36
   2  -3 -12    2.61    1.04
   3   2 -12    3.76    1.12
  -3  -2  13    0.91    1.12
   2  -3  13    1.91    1.44
  -2   3  13    0.87    0.98
  -2   3 -13   -0.01    0.95
  -2   3 -13    1.73    1.15
   3   2 -13    1.22    0.98
   2  -3 -13    1.13    1.48
  -3  -2 -13    1.18    1.14
   3   2 -13    1.04    0.91
   2  -3  14    0.67    1.81
   3   2  14    0.12    1.04
  -2   3  14   -0.18    1.24
  -3  -2  14    1.27    0.91
   3   2 -14    0.26    0.73
  -2   3 -14   -0.84    1.45
   3   2 -14   -0.30    0.80
  -3  -2 -14   -0.61    1.53
   2  -3 -14   -0.38    0.75
   3   2  15    0.46    1.18
   2  -3  15    0.60    1.37
  -3  -2  15   -0.23    1.08
  -2   3  15    0.74    0.96
  -3  -2 -15    1.45    1.13
   2  -3 -15    0.05    1.36
  -2   3 -15    0.02    0.89
  -2   3 -15    0.22    1.04
   3   2 -15   -0.66    1.36
   3   2 -15   -0.85    1.38
   3   2  16    0.52    1.44
   2  -3  16    7.64    2.58
  -3  -2  16   -0.27    1.27
  -2   3  16   -0.22    1.10
  -3  -2 -16    2.01    2.02
  -2   3 -16    0.57    1.19
   3   2 -16    1.43    1.04
   2  -3 -16    0.02    1.03
   3   2 -16   -0.04    1.03
   3   2  17    1.90    1.45
   2  -3  17    3.25    1.62
  -2   3  17   -0.03    1.82
  -3  -2  17    1.12    2.03
  -3  -2 -17   -0.75    1.38
  -2   3 -17   -2.71    1.85
   2  -3 -17    2.50    1.67
   3   2 -17   -0.24    1.09
   3   2 -17   -0.10    1.11
   3   3   0   89.11    2.11
  -3   3   0   91.72    1.95
   3  -3   0   90.48    1.98
  -3  -3   0   89.48    2.13
   3  -3   0   86.55    1.99
  -3   3   0   88.54    2.01
  -3  -3   1 1163.17   30.70
   3   3   1 1131.89   31.23
   3  -3   1 1163.83   33.17
  -3   3   1 1131.31   31.28
   3  -3   1 1161.93   29.47
  -3  -3  -1 1170.77   32.31
   3  -3  -1 1128.69   31.17
   3   3  -1 1116.73   29.70
  -3   3  -1 1187.05   30.18
   3  -3  -1 1185.53   29.68
  -3   3  -1 1197.06   33.81
   3   3   2   27.53    2.46
  -3  -3   2   25.55    0.89
  -3   3   2   26.46    1.48
   3  -3   2   28.23    1.43
  -3   3  -2   27.03    1.41
   3  -3  -2   25.04    0.54
  -3  -3  -2   26.85    1.57
   3  -3  -2   25.69    1.49
   3   3   3  922.69   26.61
  -3  -3   3  916.48   24.52
  -3  -3   3  955.22   24.74
   3  -3   3  952.75   27.84
  -3   3   3  949.37   27.47
  -3   3   3  932.39   22.19
  -3   3  -3  940.99   27.04
   3  -3  -3  911.13   22.12
   3   3  -3  963.91   24.62
   3  -3  -3  939.74   29.18
  -3  -3  -3  963.60   29.40
   3  -3   4  358.57   11.53
  -3  -3   4  373.22    9.15
  -3   3   4  357.16    7.62
  -3  -3   4  359.87    8.52
   3   3   4  355.08    9.77
  -3   3  -4  364.02   11.30
   3  -3  -4  359.30   10.05
   3   3  -4  343.62    7.88
   3  -3  -4  364.60    7.98
  -3  -3  -4  358.03    9.91
   3   3  -4  354.83    8.46
  -3  -3   5   14.28    0.96
  -3  -3   5   12.80    0.86
  -3   3   5   13.26    1.00
   3  -3   5   12.41    1.41
   3   3   5   13.90    1.27
  -3   3  -5   11.39    1.29
   3   3  -5   13.73    0.86
  -3  -3  -5   12.65    1.31
   3   3  -5   13.27    1.17
   3  -3  -5   14.51    1.32
   3  -3  -5   12.81    0.66
  -3  -3   6   -0.01    0.57
   3   3   6    0.59    0.77
  -3  -3   6    0.71    0.52
   3  -3   6   -0.11    0.86
   3   3  -6    0.58    0.50
  -3  -3  -6   -0.14    1.24
   3   3  -6    0.14    0.72
  -3   3  -6    1.16    0.79
   3  -3  -6    0.78    0.77
   3  -3  -6    1.06    0.39
   3   3   7   16.86    1.59
   3  -3   7   19.10    1.81
  -3  -3   7   19.14    1.94
  -3   3   7   16.63    0.99
  -3  -3  -7   17.35    1.65
  -3   3  -7   14.69    2.49
   3   3  -7   16.79    1.04
   3  -3  -7   18.72    0.98
   3  -3  -7   18.56    1.70
   3   3  -7   17.04    1.14
   3   3   8   10.19    1.47
  -3  -3   8   10.95    1.93
   3  -3   8   11.32    1.69
  -3   3   8    9.91    0.93
   3  -3  -8   10.24    1.55
   3   3  -8   11.10    1.50
  -3   3  -8   12.04    2.35
   3  -3  -8   10.13    0.92
  -3  -3  -8   10.38    1.52
   3   3  -8   13.57    1.73
  -3  -3   9   13.81    2.39
   3  -3   9   13.93    2.02
   3   3   9   13.66    1.82
  -3   3   9   15.35    1.20
   3   3  -9   13.17    1.90
  -3   3  -9   13.66    1.84
  -3  -3  -9   14.72    1.82
   3  -3  -9   15.91    1.75
   3   3  -9   13.50    1.35
   3  -3  -9   15.02    1.91
  -3  -3  10   74.07    3.55
  -3   3  10   71.21    2.91
   3   3  10   66.40    3.84
   3  -3  10   76.12    4.35
   3  -3 -10   73.45    2.88
   3   3 -10   70.39    2.93
  -3   3 -10   68.88    3.83
   3  -3 -10   72.29    4.04
   3   3 -10   72.84    3.11
  -3  -3  11    7.17    1.45
   3  -3  11    7.77    1.93
   3   3  11    5.86    1.72
  -3   3  11    5.73    1.19
  -3   3 -11    6.06    1.24
   3   3 -11    6.43    1.87
  -3   3 -11    6.35    1.69
   3   3 -11    7.69    1.22
   3  -3 -11    6.66    1.12
   3   3  12    0.66    0.86
   3  -3  12   -0.31    0.98
  -3  -3  12   -0.19    0.76
  -3   3  12   -0.22    0.60
   3   3 -12    0.00    0.98
   3   3 -12   -0.11    0.94
  -3   3 -12    0.89    1.32
   3  -3 -12    0.08    0.93
   3   3  13    4.47    1.57
  -3  -3  13    5.21    1.51
  -3   3  13    3.07    1.83
   3  -3  13    5.41    1.89
  -3   3 -13    6.70    1.55
   3   3 -13    5.00    1.17
   3   3 -13    5.88    1.87
  -3   3 -13    0.04    1.25
   3  -3 -13    0.01    1.68
   3  -3 -13    4.40    1.15
  -3   3  14   12.42    1.69
   3   3  14   13.00    3.47
  -3  -3  14   15.19    2.22
   3  -3  14   14.78    2.65
   3   3 -14   12.06    1.67
   3  -3 -14    8.86    2.50
  -3  -3 -14   11.65    2.20
   3   3 -14   13.97    1.72
  -3   3 -14   12.06    2.12
   3   3  15    0.91    1.23
  -3   3  15    0.05    0.89
  -3  -3  15    0.56    1.87
   3  -3  15    0.86    1.52
   3   3 -15    0.87    0.93
  -3  -3 -15   -2.34    1.83
  -3   3 -15    3.02    1.80
   3  -3 -15   -0.15    0.88
   3   3 -15    0.13    0.87
  -3  -3  16   -0.71    1.40
   3   3  16    2.85    1.47
   3  -3  16   -0.09    2.73
  -3   3  16   -0.39    1.81
   3   3 -16   -0.07    1.68
  -3  -3 -16    2.57    1.35
   3  -3 -16    0.00    1.58
  -3   3 -16    1.35    1.24
   3   3 -16    0.14    1.13
  -3  -3  17    0.70    1.35
   3   3  17    0.77    1.40
   3  -3  17    0.38    1.65
  -3   3  17   -0.08    1.06
   3   3 -17   -0.11    0.98
   3   3 -17    1.13    1.65
  -3   3 -17    1.02    1.12
  -3  -3 -17   -0.70    1.50
   3  -3 -17   -0.03    0.93
   3   4   0    0.66    0.44
  -4   3   0    0.30    0.31
  -4   3   0    0.39    0.66
  -3  -4   0    0.74    0.47
   4  -3   0    0.01    0.33
   4  -3   0    0.38    0.37
  -4   3   1   13.47    0.66
   3   4   1   12.39    1.06
  -4   3   1   12.74    0.99
   4  -3   1   13.83    0.94
  -3  -4   1   12.91    1.37
  -4   3  -1   12.90    0.89
   4  -3  -1   12.88    0.71
  -3  -4  -1   11.75    1.11
   4  -3  -1   13.39    1.50
  -4   3  -1   12.81    0.65
   3   4   2  101.35    3.02
   4  -3   2   98.41    3.07
  -4   3   2   98.58    3.03
  -3  -4  -2   99.64    3.09
   4  -3  -2   96.98    2.98
  -4   3  -2  103.49    3.03
   4  -3  -2  100.60    1.75
  -4   3   3   18.38    0.35
  -4   3   3   18.01    1.40
   3   4   3   18.30    2.05
  -3  -4   3   19.75    1.55
  -3  -4   3   20.26    1.11
   4  -3   3   19.44    1.42
  -4   3  -3   18.63    1.33
  -3  -4  -3   18.68    1.37
   4  -3  -3   19.59    1.30
  -3  -4   4   87.96    2.57
   4  -3   4   84.34    3.16
  -4   3   4   84.22    1.53
  -3  -4   4   85.14    2.10
   3   4   4   85.59    3.92
  -4   3   4   81.15    3.07
   4  -3  -4   85.90    4.08
   4  -3  -4   84.07    1.81
  -4   3  -4   83.34    3.01
   3   4  -4   84.91    1.94
  -3  -4  -4   85.17    2.93
   3   4  -4   83.45    2.29
  -3  -4   5  202.29    6.40
  -3  -4   5  189.30    4.59
  -4   3   5  195.47    4.46
   4  -3   5  205.30    6.47
   3   4   5  196.12    5.85
   3   4  -5  191.36    4.37
  -3  -4  -5  200.28    6.12
   4  -3  -5  195.78    4.61
   3   4  -5  199.58    5.18
   4  -3  -5  198.37    6.05
  -4   3  -5  189.03    5.97
   4  -3   6    4.46    1.19
   3   4   6    3.15    1.04
  -4   3   6    4.13    0.48
  -3  -4   6    4.08    0.63
  -3  -4   6    4.07    0.83
  -4   3  -6    3.60    1.09
   4  -3  -6    3.55    1.07
   3   4  -6    3.96    0.75
   3   4  -6    3.85    0.52
   4  -3  -6    3.61    0.72
  -3  -4  -6    2.91    1.06
   4  -3   7   21.60    1.95
   3   4   7   23.36    1.76
  -3  -4   7   23.79    2.19
  -4   3   7   21.75    1.43
   3   4  -7   23.39    1.32
  -3  -4  -7   25.45    1.83
   4  -3  -7   21.25    0.97
  -4   3  -7   20.85    1.81
   4  -3  -7   20.84    1.79
   3   4  -7   20.76    1.00
   4  -3   8    0.78    0.98
  -3  -4   8   -0.12    1.14
  -4   3   8    0.60    0.45
   3   4   8   -0.18    0.83
   4  -3  -8    0.29    0.45
  -4   3  -8    0.60    0.86
   4  -3  -8    0.52    0.87
   3   4  -8    0.19    0.62
  -3  -4  -8    1.00    0.84
   3   4  -8    0.67    0.72
  -3  -4   9   23.51    2.87
   4  -3   9   20.10    2.51
   3   4   9   24.14    3.24
  -4   3   9   22.17    1.31
  -3  -4  -9   23.21    2.04
  -4   3  -9   17.15    3.27
   4  -3  -9   22.29    2.18
   3   4  -9   23.12    1.64
   4  -3  -9   22.32    1.81
   3   4  -9   21.13    1.34
   4  -3  10   59.71    4.07
  -4   3  10   57.87    2.43
   3   4  10   63.60    5.17
  -3  -4  10   57.56    3.14
   3   4 -10   60.57    2.42
  -4   3 -10   54.08    3.47
  -3  -4 -10   55.36    3.41
   4  -3 -10   58.98    2.44
   4  -3 -10   56.48    3.58
   3   4 -10   61.01    2.88
  -4   3  11    5.08    1.01
   4  -3  11    4.53    3.01
  -3  -4  11    3.78    1.46
   3   4 -11    5.79    1.16
   4  -3 -11    4.19    1.54
  -4   3 -11    2.71    1.60
   4  -3 -11    5.65    1.64
   3   4 -11    5.26    0.98
   4  -3  12    1.80    1.43
  -4   3  12   -0.31    1.26
  -3  -4  12    2.05    1.17
   3   4 -12    1.33    0.78
   4  -3 -12    0.55    0.74
   3   4 -12    0.64    0.93
  -4   3 -12    0.26    1.26
   4  -3  13    2.27    2.71
   3   4  13    1.13    1.37
  -3  -4  13    2.02    2.12
  -4   3  13    2.39    0.94
   3   4 -13    2.52    1.07
  -4   3 -13    1.61    2.14
   4  -3 -13    1.73    1.48
   4  -3 -13   -0.05    1.42
   3   4 -13    1.15    1.48
   3   4  14   -0.62    0.93
  -3  -4  14    0.64    0.94
   4  -3  14   -1.22    1.16
  -4   3  14   -0.10    0.64
   4  -3 -14    0.05    0.62
   3   4 -14    0.46    0.73
  -4   3 -14   -0.01    0.72
  -4   3 -14   -1.28    0.88
  -3  -4 -14    1.22    1.46
   4  -3 -14    0.00    0.97
   3   4 -14    0.98    0.95
   3   4  15    7.20    1.78
   4  -3  15    4.20    2.20
  -4   3  15    0.08    1.27
  -3  -4  15    6.35    1.79
  -4   3 -15    4.16    1.64
   4  -3 -15    0.09    1.74
  -3  -4 -15    7.90    1.62
   3   4 -15    0.10    1.22
   3   4 -15    3.56    2.11
  -4   3  16   -0.14    1.31
   3   4  16    4.56    1.84
  -3  -4  16   -0.46    1.96
   4  -3  16   -1.35    1.43
  -4   3 -16    1.60    1.67
   4  -3 -16    0.98    1.85
   4  -3 -16   -0.20    0.75
   3   4 -16   -0.55    0.95
  -3  -4 -16   -1.36    1.16
   3   4 -16   -0.02    0.81
  -3  -4  17   -0.59    1.55
   3   4  17    1.19    1.43
  -4   3  17    0.19    1.00
   4  -3  17   -1.23    1.80
   4  -3 -17    1.27    1.42
  -4   3 -17   -2.31    1.26
  -3  -4 -17    3.50    1.75
  -4   3 -17    0.06    1.10
   3   4 -17    0.13    1.51
   4  -3 -17    0.06    1.46
   3   4 -17    2.77    1.14
   3   5   0  100.19    2.66
  -5   3   0  100.96    2.83
   5  -3   0   99.04    2.38
   5  -3   0   91.91    2.39
  -5   3   0   97.89    2.52
  -3  -5   0   97.35    2.66
   5  -3   1    7.31    0.78
  -5   3   1    6.77    0.85
  -5   3   1    7.39    0.38
   3   5   1    7.12    1.39
  -3  -5   1    7.28    0.77
  -5   3  -1    7.94    0.77
  -5   3  -1    7.23    0.58
   5  -3  -1    7.60    0.43
  -3  -5  -1    7.48    0.90
   5  -3  -1    6.92    0.78
   5  -3   2  119.66    3.56
   3   5   2  121.42    4.35
  -5   3   2  117.54    3.47
  -5   3  -2  116.23    3.40
   5  -3  -2  126.21    2.19
  -3  -5  -2  119.82    3.49
   5  -3  -2  119.94    4.37
   5  -3   3  125.72    3.97
  -5   3   3  124.08    5.00
   3   5   3  124.42    3.68
  -3  -5   3  122.31    2.55
  -3  -5   3  128.65    3.39
   5  -3  -3  123.84    3.76
  -5   3  -3  125.00    3.89
  -3  -5  -3  121.00    3.68
  -5   3   4  155.95    5.00
   5  -3   4  163.14    5.39
  -5   3   4  157.86    2.62
   3   5   4  161.22    4.79
  -3  -5   4  163.41    4.13
  -3  -5   4  165.09    4.51
  -5   3  -4  154.94    5.03
   5  -3  -4  154.63    4.85
  -3  -5  -4  154.47    4.80
  -5   3   5  133.40    2.50
  -5   3   5  134.48    4.72
  -3  -5   5  145.20    4.24
   3   5   5  134.83    4.43
  -3  -5   5  135.19    3.79
   5  -3   5  135.04    6.46
   3   5  -5  139.16    3.08
   3   5  -5  136.76    3.82
   5  -3  -5  137.82    4.58
  -5   3  -5  135.37    4.73
   5  -3  -5  134.63    2.84
  -3  -5  -5  137.02    4.58
  -3  -5   6    4.25    0.55
  -5   3   6   -1.39    1.10
   5  -3   6    3.26    1.17
  -3  -5   6    3.75    0.84
   3   5   6    2.84    1.01
  -5   3   6    3.60    0.35
   3   5  -6    2.48    0.70
  -5   3  -6    3.53    1.73
   5  -3  -6    2.80    1.02
   5  -3  -6    3.94    0.55
  -3  -5  -6    3.95    1.06
   3   5  -6    2.96    0.75
  -5   3   7   12.17    0.66
   5  -3   7   12.40    1.74
   3   5   7   11.46    1.46
  -3  -5   7   12.24    1.99
   5  -3  -7   12.45    0.65
  -5   3  -7   11.14    1.54
   3   5  -7   13.65    1.73
  -3  -5  -7   15.32    2.39
   3   5  -7   12.17    1.10
   5  -3  -7   12.73    1.50
  -5   3   8   19.50    1.40
   3   5   8   20.52    1.92
   5  -3   8   17.03    2.23
  -3  -5   8   20.67    1.69
   3   5  -8   18.56    0.99
  -3  -5  -8   31.47    3.13
   5  -3  -8   16.30    1.98
   5  -3  -8   18.83    0.95
  -5   3  -8   20.53    1.99
   3   5  -8   19.94    1.48
   5  -3   9   -0.14    1.06
  -3  -5   9    1.31    0.82
   3   5   9   -0.21    1.45
  -5   3   9   -0.33    0.73
   3   5  -9    0.06    0.67
   5  -3  -9    0.26    0.89
   3   5  -9    0.79    0.73
   5  -3  -9   -0.38    0.67
  -3  -5  -9    0.85    0.88
  -5   3  -9   -0.28    0.94
   5  -3  10    2.32    2.15
  -5   3  10    1.13    0.95
   3   5  10    0.40    1.84
  -3  -5  10    0.28    1.58
   5  -3 -10    1.02    0.58
  -3  -5 -10   -0.13    1.08
   3   5 -10    1.26    0.83
   3   5 -10    0.60    0.60
  -5   3 -10    1.10    1.14
   5  -3 -10    0.12    1.09
   5  -3  11    7.65    2.02
  -3  -5  11    7.45    2.43
   5  -3 -11    4.20    1.44
  -3  -5 -11    5.60    1.58
  -5   3 -11    5.54    1.76
   5  -3 -11    5.84    1.68
   3   5 -11    6.30    0.95
   3   5 -11    6.79    1.94
   5  -3  12   67.36    4.93
  -5   3  12   65.20    2.89
  -3  -5  12   71.67    4.22
   5  -3 -12   67.69    4.29
   5  -3 -12   69.17    2.98
   3   5 -12   69.97    4.74
   3   5 -12   70.38    2.89
  -5   3 -12   67.89    4.37
   3   5  13    1.96    2.06
  -5   3  13    0.14    0.84
   5  -3  13    0.57    1.68
  -3  -5  13    1.32    1.39
  -5   3 -13    1.99    1.35
   5  -3 -13   -0.06    1.37
   3   5 -13    1.30    1.02
   5  -3 -13    0.92    1.29
   3   5 -13    2.57    0.80
  -3  -5 -13    2.59    1.35
  -3  -5  14    1.08    1.31
   3   5  14    0.88    1.18
   5  -3  14    1.70    1.48
  -5   3  14   -0.14    0.80
   3   5 -14    0.00    0.76
  -5   3 -14    1.14    1.91
   5  -3 -14   -0.04    0.74
   3   5 -14    1.24    0.95
  -3  -5 -14    1.09    1.18
  -3  -5  15    2.53    1.52
  -5   3  15    0.16    1.50
   5  -3  15   -0.92    2.92
   3   5  15    2.16    1.45
  -3  -5 -15    2.84    2.21
  -5   3 -15   -0.05    1.17
   5  -3 -15   -0.04    1.41
  -5   3 -15    1.75    1.46
   5  -3 -15    2.61    1.49
   3   5 -15    1.42    1.20
   3   5 -15   -0.01    1.38
   3   5  16    3.14    1.45
  -3  -5  16    2.16    1.60
  -5   3  16    0.24    0.95
   5  -3  16    1.26    1.81
   5  -3 -16   -0.23    1.46
  -3  -5 -16    0.49    1.59
  -5   3 -16    1.06    1.44
   5  -3 -16    0.54    0.87
   3   5 -16    0.02    0.88
   3   5 -16    0.49    1.17
   3   5  17    1.39    2.16
   5  -3  17    2.24    1.76
  -3  -5  17    2.70    1.53
  -5   3  17   -0.29    0.89
  -3  -5 -17    3.04    1.73
   5  -3 -17    0.21    1.33
   5  -3 -17   -2.21    2.17
  -5   3 -17   -0.01    1.70
   3   5 -17   -0.08    0.83
  -5   3 -17   -0.56    1.35
   3   5 -17   -1.14    1.79
  -6   3   0   -0.13    0.31
   3   6   0   -0.35    0.72
  -3  -6   0    0.59    0.45
   6  -3   0    0.00    0.34
  -6   3   0    0.24    0.39
   6  -3   0    0.48    0.39
   6  -3   1   14.34    0.98
   3   6   1   16.24    1.60
  -3  -6   1   13.79    0.95
  -6   3   1   14.03    0.53
  -6   3   1   12.83    1.02
   6  -3  -1   14.32    0.97
  -6   3  -1   15.13    0.79
  -6   3  -1   14.19    1.40
   6  -3  -1   13.63    0.83
  -3  -6  -1   14.40    1.06
  -6   3   2    8.37    0.98
   6  -3   2    8.19    0.98
  -6   3   2    9.16    0.33
   3   6   2    8.73    0.93
  -3  -6  -2    7.15    1.00
  -6   3  -2    9.94    0.93
   6  -3  -2    8.24    0.91
   6  -3  -2    8.85    0.38
  -6   3   3    1.21    0.71
  -3  -6   3    0.20    0.57
   6  -3   3   -0.26    1.12
   3   6   3    1.28    0.62
  -3  -6  -3    0.86    0.63
  -6   3  -3    0.56    0.65
   6  -3  -3   -0.37    1.04
  -3  -6   4  641.63   19.49
  -3  -6   4  630.57   15.82
   6  -3   4  629.89   19.36
   3   6   4  633.06   18.08
  -6   3   4  605.19   18.14
   6  -3  -4  612.65   18.02
  -3  -6  -4  606.88   17.82
  -6   3  -4  612.24   18.48
  -6   3   5   21.56    0.45
  -3  -6   5   20.60    1.45
  -6   3   5   22.98    1.78
   3   6   5   24.44    1.60
   6  -3   5   24.00    1.92
  -3  -6   5   22.87    1.24
  -3  -6  -5   20.84    1.67
  -6   3  -5   21.98    1.80
   6  -3  -5   22.32    1.67
   3   6  -5   17.87    1.25
  -3  -6   6   31.49    1.75
  -6   3   6   29.13    2.06
  -6   3   6   29.50    0.88
  -3  -6   6   28.76    1.06
   3   6   6   35.29    2.80
   6  -3   6   30.55    2.21
  -3  -6  -6   30.06    3.02
   3   6  -6   29.39    1.52
   6  -3  -6   30.31    1.94
  -6   3  -6   29.26    2.03
   6  -3  -6   28.83    0.69
  -3  -6   7    1.32    0.80
  -3  -6   7    1.10    0.46
  -6   3   7    0.41    0.98
  -6   3   7    0.81    0.28
   6  -3   7    0.33    1.10
   3   6   7    0.79    0.86
   3   6  -7    1.03    0.34
   3   6  -7    0.87    0.68
  -3  -6  -7    0.97    0.92
  -6   3  -7   -0.84    0.99
   6  -3  -7    1.83    0.88
   6  -3  -7    0.85    0.27
   3   6   8  168.58    6.24
  -6   3   8  168.93    4.11
  -3  -6   8  176.78    6.28
   6  -3   8  172.15    7.25
  -6   3  -8  157.71    8.40
  -3  -6  -8  176.27    6.70
   3   6  -8  180.42    5.81
   3   6  -8  170.04    4.27
   6  -3  -8  165.15    4.10
   3   6   9    5.25    2.32
  -6   3   9    5.43    0.67
  -3  -6   9    7.72    1.40
   6  -3   9    6.62    1.91
   3   6  -9    6.29    1.88
   3   6  -9    4.68    1.03
  -3  -6  -9    4.95    1.45
  -6   3  -9    5.18    1.62
   6  -3  -9    5.51    0.64
   6  -3  -9    7.23    2.38
   6  -3  10    0.66    1.42
  -6   3  10    0.81    0.52
  -3  -6  10    1.03    1.07
   3   6  10    0.43    1.11
   6  -3 -10    1.29    0.78
   3   6 -10    0.10    0.84
   3   6 -10    1.58    0.87
  -3  -6 -10    1.68    1.74
  -6   3 -10    0.60    1.20
  -3  -6  11    0.53    1.12
   6  -3  11    0.36    1.50
  -6   3  11    1.11    0.59
   3   6  11    0.72    1.16
   6  -3 -11    0.43    1.87
   6  -3 -11    0.82    0.85
   3   6 -11   -0.82    0.92
  -3  -6 -11    0.97    1.17
   3   6 -11    1.28    0.58
  -6   3 -11    2.29    2.00
  -6   3  12    0.70    0.54
   6  -3  12    0.83    2.02
  -3  -6  12   -1.12    1.62
   3   6  12   -1.86    1.03
   3   6 -12    0.31    0.53
  -3  -6 -12    0.43    1.01
   6  -3 -12   -0.01    0.51
  -6   3 -12    0.22    1.05
   6  -3 -12   -0.79    1.01
   3   6 -12    0.18    0.80
  -6   3  13    0.06    0.76
   6  -3  13    3.27    1.75
   3   6  13    3.19    1.29
  -3  -6  13    3.45    2.24
   6  -3 -13    2.99    1.38
  -6   3 -13    2.01    1.42
   3   6 -13    2.74    1.06
  -3  -6 -13    3.11    1.38
   3   6 -13   -0.05    0.73
   6  -3 -13    0.02    1.15
   3   6  14    9.23    3.21
  -6   3  14    0.29    1.91
  -3  -6  14    8.56    2.25
   6  -3  14    8.19    2.57
  -3  -6 -14    6.36    3.03
   6  -3 -14    8.26    1.16
   3   6 -14   10.95    1.68
   6  -3 -14    9.22    2.13
  -6   3 -14   10.24    2.20
   3   6 -14    9.90    1.17
   6  -3  15    2.20    1.29
   3   6  15   -0.93    1.66
  -3  -6  15   -0.44    1.16
  -6   3  15   -0.11    0.63
  -3  -6 -15   -0.88    1.07
   6  -3 -15   -0.05    0.58
   3   6 -15    0.05    0.91
  -6   3 -15   -0.21    0.90
   3   6 -15    0.35    1.39
  -6   3 -15   -0.11    1.37
   6  -3 -15    1.28    1.12
  -3  -6  16    7.91    3.54
   3   6  16    7.97    1.96
   6  -3  16   11.06    2.54
  -6   3  16    0.07    1.23
   3   6 -16    0.02    1.66
  -6   3 -16    0.05    1.61
  -6   3 -16    5.75    1.72
  -3  -6 -16    5.13    2.25
   6  -3 -16    6.22    1.73
   3   6 -16    7.62    2.43
   6  -3 -16   10.01    3.02
   3   6  17    1.35    1.79
  -3  -6  17    1.20    2.04
   6  -3 -17    6.08    1.72
  -6   3 -17   -0.01    1.38
  -3  -6 -17    5.07    3.56
   3   6 -17    1.17    1.38
   3   7   0  856.80   23.71
  -3  -7   0  841.91   23.22
  -7   3   0  834.99   22.98
   7  -3   0  848.20   23.78
  -7   3   0  834.36   22.81
  -3  -7   1   95.78    2.70
   7  -3   1   96.85    2.82
   3   7   1   98.25    2.90
  -7   3   1   92.49    2.84
  -7   3   1   96.78    2.09
  -7   3  -1   95.80    2.48
  -7   3  -1   92.27    2.67
   7  -3  -1   98.81    2.57
  -3  -7  -1   99.44    2.91
   7  -3  -1   96.08    2.78
  -7   3   2    6.85    0.94
   3   7   2    5.41    0.87
   7  -3   2    6.93    0.91
  -3  -7   2    4.58    0.77
  -7   3   2    5.47    0.36
  -3  -7  -2    5.84    0.92
   7  -3  -2    5.75    0.39
  -7   3  -2    6.20    0.81
   7  -3  -2    5.17    1.35
   7  -3   3   23.00    1.64
  -3  -7   3   22.00    2.13
   3   7   3   22.85    1.43
  -7   3   3   22.89    1.58
  -3  -7  -3   22.31    1.46
   7  -3  -3   23.75    2.22
  -7   3  -3   21.42    2.22
  -3  -7   4  115.17    3.69
   3   7   4  114.49    3.76
  -3  -7   4  111.98    2.38
  -7   3   4  110.25    3.97
   7  -3   4  115.20    5.63
  -7   3  -4  109.38    4.11
  -3  -7  -4  112.75    3.84
   7  -3  -4  115.02    3.97
  -3  -7   5    3.09    0.39
  -3  -7   5    2.12    0.89
   3   7   5    2.48    0.94
   7  -3   5    0.86    1.22
  -7   3   5    1.51    1.03
   7  -3  -5    2.63    0.96
  -7   3  -5    2.65    1.04
  -3  -7  -5    2.94    1.56
  -7   3   6    5.95    1.26
  -7   3   6    4.51    0.22
   3   7   6    3.71    1.70
  -3  -7   6    5.11    1.04
  -3  -7   6    5.20    0.78
   7  -3   6    2.86    1.40
  -3  -7  -6    5.11    1.18
   7  -3  -6    3.67    1.12
   3   7  -6    5.13    0.93
  -7   3  -6    5.50    1.22
  -3  -7   7   15.20    1.77
   3   7   7   19.77    1.79
   7  -3   7   20.35    2.25
  -7   3   7   18.93    0.74
  -7   3   7   16.55    2.10
  -3  -7   7   19.63    0.99
   7  -3  -7   18.61    0.51
  -7   3  -7   17.13    2.04
  -3  -7  -7   19.41    1.96
   7  -3  -7   17.54    2.93
   3   7  -7   20.62    1.53
  -7   3   8   72.72    1.78
  -3  -7   8   72.69    4.94
   7  -3   8   75.23    6.38
   3   7   8   79.44    5.23
   7  -3  -8   68.16    3.81
  -3  -7  -8   78.14    3.89
   3   7  -8   75.99    3.28
   3   7  -8   70.37    1.91
   7  -3  -8   68.39    1.68
  -7   3   9    8.77    1.00
  -3  -7   9   10.98    2.62
   3   7   9   10.62    1.69
   3   7  -9   10.30    0.72
   7  -3  -9   11.37    1.81
  -3  -7  -9   11.01    1.75
  -7   3  -9   11.64    1.96
   3   7  -9    9.72    1.44
   7  -3  -9   11.15    0.62
   3   7  10    9.07    1.73
   7  -3  10    9.43    2.25
  -7   3  10    9.10    1.16
  -3  -7  10    9.11    2.71
   7  -3 -10    8.09    0.70
   3   7 -10   10.29    1.45
  -3  -7 -10    8.45    1.75
  -7   3 -10    8.43    1.91
   3   7 -10    8.29    1.15
   7  -3 -10   11.74    1.82
  -7   3  11   12.26    1.41
   3   7  11   12.51    1.89
  -3  -7  11   13.77    2.02
   7  -3  11   11.49    2.62
   7  -3 -11   11.15    0.88
   3   7 -11   11.03    1.60
   7  -3 -11   15.34    2.03
   3   7 -11   12.77    1.41
  -3  -7 -11   12.65    1.99
  -3  -7  12   14.32    2.28
  -7   3  12   14.12    1.64
   3   7  12   14.00    2.06
   7  -3 -12   15.05    1.08
   3   7 -12   14.86    1.12
   3   7 -12   15.16    1.83
   7  -3 -12   14.32    2.27
  -3  -7 -12   18.70    3.54
  -7   3 -12   10.65    3.70
   3   7  13    0.44    1.33
  -7   3  13    1.52    0.68
  -3  -7  13    2.49    1.48
   7  -3  13    3.02    1.80
   3   7 -13    2.08    0.67
  -3  -7 -13    1.68    1.44
   7  -3 -13    1.26    2.28
   7  -3 -13    0.52    0.99
   3   7 -13    0.39    1.13
  -7   3 -13    2.25    1.53
  -3  -7  14   -1.88    1.76
  -7   3  14    0.09    0.50
   7  -3  14    4.18    2.09
   3   7  14    1.22    1.01
   3   7 -14    0.06    0.50
   3   7 -14   -0.20    0.86
  -3  -7 -14    0.22    0.98
   7  -3 -14   -0.37    0.48
   7  -3 -14    0.17    1.64
  -3  -7  15   -1.85    1.37
   7  -3  15    3.60    1.46
   3   7  15   -0.03    1.14
  -7   3  15   -0.03    0.98
  -7   3 -15   -0.05    0.94
   7  -3 -15    0.20    0.56
  -7   3 -15    0.18    1.65
   7  -3 -15   -1.19    1.21
   3   7 -15   -0.05    0.88
  -3  -7 -15    2.76    1.22
   3   7 -15   -0.82    0.97
  -3  -7  16   -3.31    1.36
   3   7  16   -0.06    1.88
   7  -3  16    0.89    1.47
   3   7 -16    0.91    0.98
   7  -3 -16    1.13    1.26
   3   7 -16    0.02    0.87
  -3  -7 -16   -3.52    2.23
  -7   3 -16   -0.03    1.56
  -7   3 -16   -0.09    1.09
  -8   3   0   -0.11    0.69
  -8   3   0   -0.02    0.32
  -3  -8   0    0.05    0.47
   8  -3   0   -0.14    0.34
   8  -3   1    7.61    0.88
   3   8   1    9.08    0.93
  -8   3   1    8.47    0.50
  -3  -8   1    7.94    0.92
  -8   3   1    8.82    0.97
   8  -3  -1    8.62    0.93
  -8   3  -1    8.81    1.25
  -8   3  -1    8.24    0.79
   8  -3  -1    9.11    0.54
  -3  -8  -1    8.58    1.55
  -8   3   2   26.59    1.63
  -8   3   2   27.63    0.83
   3   8   2   30.19    2.26
   8  -3   2   25.40    1.53
  -3  -8   2   27.19    1.43
  -8   3  -2   26.17    1.47
   8  -3  -2   27.40    2.33
   8  -3  -2   26.85    0.86
  -3  -8  -2   24.94    1.52
  -8   3   3   64.95    3.77
  -3  -8   3   69.30    3.51
   8  -3   3   69.05    2.93
   3   8   3   70.88    2.61
  -3  -8  -3   68.15    2.66
   8  -3  -3   70.94    3.75
  -8   3  -3   61.38    2.63
  -8   3   4    9.56    2.05
   3   8   4    9.40    1.19
  -3  -8   4    8.14    1.18
   8  -3   4   10.00    1.41
  -3  -8   4    8.81    0.46
  -8   3  -4    9.57    1.28
  -3  -8  -4    9.24    1.19
   8  -3  -4    8.12    1.22
  -3  -8   5  195.43    6.06
   3   8   5  195.82    6.10
   8  -3   5  193.13    6.90
  -8   3   5  191.70    8.02
  -3  -8   5  200.11    4.32
   8  -3  -5  193.82    6.35
  -3  -8  -5  194.71    6.26
  -8   3  -5  192.66    7.97
  -8   3   6   26.85    3.23
  -3  -8   6   26.10    1.94
   8  -3   6   26.27    2.39
  -3  -8   6   27.37    0.92
   3   8   6   25.51    2.85
  -8   3  -6   25.04    2.14
   8  -3  -6   27.51    2.92
  -3  -8  -6   25.23    2.05
  -8   3   7  173.38    6.66
  -3  -8   7  178.69    6.37
  -8   3   7  167.82    2.87
  -3  -8   7  178.06    5.00
   3   8   7  174.64    6.15
   8  -3  -7  164.59    6.32
  -8   3  -7  159.76    6.59
   3   8  -7  179.04    5.85
  -3  -8  -7  181.11    6.62
  -8   3   8   24.73    0.86
  -8   3   8   25.86    2.58
  -3  -8   8   26.22    2.26
   3   8   8   27.81    3.41
  -8   3  -8   25.10    2.56
  -3  -8  -8   28.02    2.36
   3   8  -8   25.81    1.90
   8  -3  -8   24.96    0.78
   8  -3  -8   28.98    2.37
   8  -3   9   61.98    4.34
  -8   3   9   55.28    1.79
  -3  -8   9   62.06    3.56
   3   8   9   56.98    3.36
   3   8  -9   58.18    4.18
   8  -3  -9   55.56    3.51
   8  -3  -9   55.74    1.68
  -3  -8  -9   55.36    3.54
   3   8  10   -0.58    0.84
  -3  -8  10    0.36    0.89
   8  -3  10    0.08    1.15
  -8   3  10    0.10    0.43
  -3  -8 -10    0.72    0.87
   8  -3 -10   -0.14    0.24
   3   8 -10    0.03    0.29
   3   8 -10    0.16    0.71
  -8   3 -10    1.52    0.99
   8  -3 -10    0.55    0.89
  -3  -8  11    0.15    1.16
   3   8  11   -0.17    1.02
  -8   3  11    0.53    0.39
   3   8 -11    1.01    0.88
   8  -3 -11   -0.30    1.11
   8  -3 -11    1.01    0.55
  -8   3 -11    1.52    1.25
   3   8 -11   -0.11    0.39
  -3  -8 -11    0.51    1.16
   3   8  12    2.42    1.28
  -8   3  12    1.59    0.56
  -3  -8  12    0.80    2.27
   3   8 -12    2.07    1.16
  -3  -8 -12    2.35    1.47
   8  -3 -12    1.23    0.78
   8  -3 -12    1.99    1.43
   3   8 -12    2.37    0.87
   8  -3  13   12.33    2.87
  -8   3  13   10.61    1.46
  -3  -8  13   14.24    2.32
   3   8  13   12.07    2.10
   3   8 -13   12.38    1.46
  -8   3 -13   12.18    2.47
  -3  -8 -13   10.96    2.25
   8  -3 -13   11.00    2.31
   8  -3 -13   10.66    0.94
   3   8 -13   12.72    1.79
   3   8  14    0.49    1.14
  -8   3  14    0.08    0.81
  -3  -8  14    0.96    1.37
  -3  -8 -14    1.19    1.88
  -8   3 -14    0.33    1.37
   8  -3 -14    0.16    0.50
   3   8 -14   -0.51    1.01
   3   8 -14    0.37    0.78
   8  -3 -14    0.86    1.24
   3   8  15    4.25    1.84
  -3  -8  15    8.94    2.21
   3   8 -15    5.66    1.64
  -3  -8 -15    7.09    2.06
   8  -3 -15    3.71    1.25
   8  -3 -15    6.74    2.02
   3   8 -15    0.00    1.26
   3   8  16    2.37    1.50
  -3  -8  16    1.18    2.85
   8  -3  16    1.02    1.95
  -8   3 -16    0.00    1.31
  -8   3 -16    2.13    1.45
  -3  -8 -16   -2.48    1.83
   8  -3 -16    3.23    2.47
   3   8 -16    1.18    2.01
  -9   3   0  294.49    8.14
  -9   3   0  301.69    8.00
   9  -3   0  307.06    7.83
  -3  -9   0  299.19    8.06
   9  -3   1   97.63    3.09
  -9   3   1  100.89    3.23
  -9   3   1   99.55    2.82
  -3  -9   1   97.62    3.97
   3   9   1   98.86    4.16
  -9   3  -1   98.94    2.91
  -9   3  -1   98.24    2.97
  -3  -9  -1   95.76    3.18
   9  -3  -1  102.40    3.27
   9  -3  -1   96.90    2.38
  -9   3   2  200.46    5.97
   3   9   2  203.89    5.82
   9  -3   2  193.47    5.88
  -9   3   2  202.46    4.08
  -3  -9   2  201.72    5.60
   9  -3  -2  200.54    4.46
  -9   3  -2  197.16    5.09
  -9   3  -2  191.94    5.70
   9  -3  -2  204.34    5.93
  -3  -9  -2  198.13    5.79
  -9   3   3   87.67    1.25
  -9   3   3   87.37    3.32
  -3  -9   3   89.74    4.13
   9  -3   3   84.74    3.39
   3   9   3   91.72    3.13
   9  -3  -3   86.35    1.24
  -9   3  -3   83.18    3.23
   9  -3  -3   89.80    3.27
  -3  -9  -3   85.05    3.10
   3   9   4    1.49    0.84
  -3  -9   4    1.72    0.88
  -9   3   4    1.29    0.94
   9  -3   4    1.75    1.02
  -3  -9   4    1.94    0.29
   9  -3  -4    1.94    1.43
  -3  -9  -4    1.43    0.88
  -9   3  -4    1.57    0.88
  -9   3   5    8.04    1.44
   9  -3   5    8.09    1.55
  -3  -9   5    8.73    0.49
   3   9   5    8.45    1.31
  -3  -9   5    8.51    1.31
   9  -3  -5    9.56    1.35
  -9   3  -5    7.30    1.40
  -3  -9  -5    8.80    1.32
  -9   3   6    0.07    1.02
   9  -3   6    2.23    1.09
   3   9   6    0.63    0.87
  -3  -9   6    0.46    0.90
  -3  -9   6    0.60    0.48
  -3  -9  -6    0.15    1.47
   9  -3  -6    0.78    0.98
  -9   3   7   14.01    2.15
  -3  -9   7   15.28    2.76
   9  -3   7   15.72    2.33
  -3  -9   7   13.85    1.09
   3   9   7   18.39    1.74
  -9   3  -7   15.51    2.10
   9  -3  -7   16.35    1.99
  -3  -9  -7   12.27    2.01
  -3  -9   8    1.58    1.89
   3   9   8    0.72    1.09
  -9   3   8    1.36    1.34
  -9   3  -8    2.28    1.32
  -3  -9  -8    0.92    1.22
   3   9  -8    2.37    1.01
   9  -3  -8    0.09    1.22
  -3  -9   9    9.35    2.85
  -9   3   9    7.36    2.01
  -9   3   9    7.58    0.31
   9  -3   9    9.11    3.72
   3   9   9    7.98    1.67
   9  -3  -9    8.80    2.84
  -3  -9  -9    8.57    1.84
   3   9  -9   10.62    1.53
   3   9  10    5.82    1.40
  -9   3  10    3.80    0.54
  -3  -9  10    5.32    2.49
   3   9 -10    3.99    1.29
  -3  -9 -10    2.82    1.52
   9  -3 -10    7.51    2.52
  -9   3 -10    3.55    2.74
  -3  -9  11   16.42    2.44
   3   9  11   18.38    3.21
  -9   3  11   19.15    1.08
   3   9 -11   19.22    1.99
   9  -3 -11   22.72    3.69
  -3  -9 -11   18.54    2.45
   9  -3 -11   16.77    0.70
  -3  -9  12    8.11    1.95
   9  -3  12    7.15    2.51
   3   9  12    5.44    2.66
  -9   3  12    6.76    0.60
   9  -3 -12    4.85    0.80
   3   9 -12    7.93    2.41
  -3  -9 -12    6.60    2.98
   9  -3 -12    8.75    3.02
  -3  -9  13    7.20    2.03
  -9   3  13    5.33    1.03
   3   9  13    6.47    2.83
  -3  -9 -13    7.67    1.88
   9  -3 -13    9.75    2.99
   9  -3 -13    4.93    0.90
   3   9 -13    3.78    2.48
  -9   3  14   -0.01    0.81
  -3  -9  14    2.29    1.69
   3   9  14    1.43    2.19
   9  -3 -14    2.83    1.51
   3   9 -14    0.32    1.88
  -9   3 -14    1.91    1.55
  -3  -9 -14    0.18    1.54
   9  -3 -14    1.69    0.74
   3   9  15    0.16    1.93
  -3  -9  15   -1.56    2.48
   3   9 -15    1.28    1.10
  -3  -9 -15    0.37    1.43
   9  -3 -15   -0.53    1.36
   3   9  16    1.70    1.40
  -3  -9  16    2.68    1.73
   3   9 -16    0.48    1.20
  -9   3 -16   -0.98    2.24
  -9   3 -16   -0.05    1.23
  -3  -9 -16   -4.93    2.62
   9  -3 -16    0.77    1.48
 -10   3   0   -0.23    0.37
 -10   3   0    0.14    0.50
  10  -3   0   -0.41    0.60
  -3 -10   0    0.50    0.50
 -10   3   1    4.18    0.51
 -10   3   1    5.28    1.53
  10  -3   1    4.01    0.89
  -3 -10   1    7.22    1.49
   3  10   1    5.23    0.96
 -10   3  -1    5.02    0.85
 -10   3  -1    3.56    0.77
  -3 -10  -1    4.58    0.98
  10  -3  -1    4.20    0.56
 -10   3   2   63.60    1.74
  -3 -10   2   63.80    2.46
 -10   3   2   66.70    3.87
  10  -3   2   63.62    3.62
   3  10   2   64.84    2.55
 -10   3  -2   65.57    2.23
  -3 -10  -2   62.68    2.65
 -10   3  -2   57.92    2.43
  10  -3  -2   65.13    1.82
  10  -3  -2   62.13    2.60
 -10   3   3    5.71    1.10
  10  -3   3    3.47    1.08
 -10   3   3    4.80    0.26
  -3 -10   3    6.52    1.64
   3  10   3    4.24    0.99
  10  -3  -3    4.99    1.05
  -3 -10  -3    4.73    1.04
 -10   3  -3    4.51    0.99
  10  -3  -3    4.91    0.25
 -10   3   4  107.87    4.22
   3  10   4  108.56    3.84
  -3 -10   4  110.21    4.14
  10  -3   4  105.60    4.33
  10  -3  -4  102.25    4.04
  -3 -10  -4  100.91    3.78
 -10   3  -4  106.70    4.14
 -10   3   5   10.26    1.63
   3  10   5   11.44    1.38
  -3 -10   5   10.06    1.44
  -3 -10   5   10.24    0.50
  10  -3   5    8.79    1.70
 -10   3  -5    9.35    1.50
  10  -3  -5   10.84    2.30
  -3 -10  -5   10.23    1.42
  -3 -10   6    8.56    0.49
   3  10   6    8.36    1.43
  -3 -10   6    9.73    1.52
 -10   3   6   10.86    2.76
  -3 -10  -6    8.53    1.52
  10  -3  -6    8.49    1.57
   3  10   7    7.13    2.26
  -3 -10   7    7.65    1.58
  -3 -10   7    7.81    0.75
 -10   3   7    8.90    2.87
  10  -3  -7    7.32    1.66
 -10   3  -7    6.75    1.80
  -3 -10  -7    7.24    1.65
 -10   3   8   94.11    5.11
  -3 -10   8   95.96    4.73
   3  10   8   95.37    4.28
 -10   3  -8   86.35    4.97
  10  -3  -8   97.72    4.81
  -3 -10  -8   97.52    4.72
  -3 -10   9    1.19    1.26
   3  10   9    2.11    1.11
 -10   3   9    1.19    1.43
  10  -3  -9    0.78    1.31
 -10   3  -9    0.79    1.38
   3  10  -9   -0.30    1.22
  -3 -10  -9    0.87    1.23
  10  -3  10    0.67    1.67
  -3 -10  10    0.79    1.27
  10  -3 -10    0.53    1.31
  -3 -10 -10    0.83    1.26
   3  10 -10    1.32    1.04
  -3 -10  11    1.30    1.27
   3  10  11    0.74    1.06
 -10   3  11    0.60    0.29
  10  -3 -11    1.13    1.23
  -3 -10 -11    0.67    1.24
   3  10 -11   -0.14    1.00
 -10   3  12    0.72    0.40
  -3 -10  12    0.74    1.45
   3  10  12    0.89    1.14
   3  10 -12    0.58    1.09
  -3 -10 -12    0.62    1.35
  10  -3 -12   -0.44    1.32
  -3 -10  13   -0.34    2.10
   3  10  13    0.24    1.13
 -10   3  13    0.18    0.43
  -3 -10 -13    2.27    1.22
   3  10 -13    0.70    1.04
  10  -3 -13   -0.69    1.27
   3  10  14    1.73    1.46
  -3 -10  14    2.21    1.79
   3  10 -14    2.49    1.39
  10  -3 -14    1.88    1.69
  -3 -10 -14    0.43    1.70
   3  10  15    0.50    1.45
  -3 -10  15    3.02    1.89
   3  10 -15    0.06    1.35
  -3 -10 -15    2.56    2.68
  10  -3 -15    1.50    1.62
  -3 -10  16    4.55    2.30
   3  10  16    1.95    1.85
  10  -3 -16    4.95    3.08
  -3 -10 -16    2.16    2.14
   3  10 -16    2.40    1.62
 -11   3   0    6.78    1.04
 -11   3   0    5.34    0.74
  -3 -11   0    7.70    1.07
  11  -3   0    5.53    1.25
 -11   3   1   43.50    1.47
  -3 -11   1   44.50    2.16
 -11   3   1   47.22    2.21
  11  -3   1   45.33    2.01
 -11   3  -1   45.93    2.00
  11  -3  -1   45.32    1.50
 -11   3  -1   46.01    1.90
  -3 -11  -1   47.24    2.24
  11  -3   2   44.56    2.24
   3  11   2   45.95    3.10
  -3 -11   2   45.71    3.11
 -11   3   2   47.54    2.40
 -11   3   2   46.67    1.22
 -11   3  -2   43.86    2.07
 -11   3  -2   46.75    1.95
  -3 -11  -2   41.85    3.18
  11  -3  -2   46.11    1.24
  11  -3  -2   46.84    2.31
  11  -3   3    1.99    1.05
   3  11   3    4.08    0.97
 -11   3   3    3.00    0.32
  -3 -11   3    3.16    1.66
 -11   3   3    3.22    1.75
  11  -3  -3    1.39    1.70
 -11   3  -3    3.14    0.96
  11  -3  -3    3.17    0.31
  -3 -11  -3    3.00    1.03
 -11   3   4   34.68    2.49
  11  -3   4   35.13    2.59
   3  11   4   39.29    3.28
  -3 -11   4   40.35    2.41
 -11   3  -4   33.50    2.32
  11  -3  -4   40.06    2.43
  -3 -11  -4   34.34    2.25
   3  11   5    7.52    1.34
  -3 -11   5    7.76    0.69
  -3 -11   5    9.93    1.49
 -11   3   5    7.10    1.52
 -11   3  -5    6.26    1.49
  -3 -11  -5    7.93    1.41
  11  -3  -5    7.43    1.55
  -3 -11   6    8.37    1.64
   3  11   6    8.65    1.45
  -3 -11   6    8.62    0.69
 -11   3   6    7.20    1.77
  11  -3  -6    8.70    1.60
  -3 -11  -6    9.03    2.57
 -11   3   7   -0.39    1.11
  -3 -11   7    0.32    0.23
  -3 -11   7   -0.67    1.01
   3  11   7    0.56    0.89
  -3 -11  -7    0.59    1.00
  11  -3  -7   -0.59    1.04
   3  11   8    2.50    1.17
  -3 -11   8    1.89    1.36
  11  -3   8    1.85    1.75
 -11   3   8    0.83    1.49
  11  -3  -8    1.80    1.37
  -3 -11  -8    0.13    1.27
 -11   3  -8    0.84    1.44
   3  11   9   41.43    4.23
  -3 -11   9   45.17    3.49
 -11   3   9   37.32    3.62
  11  -3  -9   39.35    3.20
 -11   3  -9   42.22    3.56
  -3 -11  -9   43.39    3.23
 -11   3  10    5.30    1.87
   3  11  10    3.67    1.42
  -3 -11  10    3.83    1.71
  11  -3 -10    3.76    1.64
  -3 -11 -10    4.58    1.68
   3  11  11    2.99    1.26
  -3 -11  11    2.97    2.58
  11  -3 -11    2.36    2.44
   3  11 -11    0.01    1.51
  -3 -11 -11    2.87    1.58
  -3 -11  12   15.42    4.19
   3  11  12   14.97    2.09
   3  11 -12    9.22    2.40
  -3 -11 -12   18.63    3.83
 -11   3 -12   16.14    2.62
  11  -3 -12   16.55    3.88
  -3 -11  13    2.67    1.80
   3  11  13    2.16    1.41
  -3 -11 -13    2.46    2.56
   3  11 -13    1.83    1.37
  11  -3 -13    0.81    1.68
  -3 -11  14   -1.04    1.50
   3  11  14   -0.28    1.13
  11  -3 -14    2.96    1.34
   3  11 -14   -0.23    1.09
  -3 -11 -14   -0.14    1.30
   3  11  15    3.33    1.40
  -3 -11  15    0.63    1.97
  11  -3 -15    1.36    1.70
   3  11 -15   -3.06    1.57
  -3 -11 -15    2.55    1.77
   3  11 -16    0.31    1.40
 -12   3   0    0.04    0.63
 -12   3   0    0.27    0.44
  12  -3   0   -0.17    0.47
  -3 -12   0    0.39    0.65
 -12   3   1    1.04    0.72
  12  -3   1    1.07    0.72
  -3 -12   1    2.49    0.83
 -12   3   1    0.97    0.87
  12  -3  -1    0.68    0.79
 -12   3  -1    1.03    0.66
  -3 -12  -1    0.83    0.86
 -12   3  -1    1.58    0.76
 -12   3   2   46.78    2.65
   3  12   2   45.76    2.38
  12  -3   2   45.24    2.37
  -3 -12   2   47.57    2.42
 -12   3   2   47.36    1.70
  12  -3  -2   48.07    1.77
 -12   3  -2   45.00    2.23
 -12   3  -2   46.84    2.12
  -3 -12  -2   47.14    2.45
 -12   3   3    2.24    0.99
   3  12   3    0.80    0.84
  -3 -12   3    1.19    0.89
  -3 -12   3    1.40    1.46
 -12   3   3    1.03    0.33
  12  -3  -3    0.92    0.33
  -3 -12  -3   -0.01    1.46
 -12   3  -3    0.49    0.86
  12  -3  -3   -0.55    0.95
  -3 -12   4    9.34    1.50
  12  -3   4    7.81    1.59
   3  12   4   10.38    1.35
 -12   3   4    8.09    1.55
  -3 -12  -4    7.17    1.47
  12  -3  -4    7.94    1.49
 -12   3  -4    6.90    1.41
 -12   3   5    6.22    1.66
  -3 -12   5    8.19    1.65
  -3 -12   5    7.98    0.70
   3  12   5   15.18    1.48
  12  -3   5    6.62    1.79
  -3 -12  -5   13.62    1.60
  12  -3  -5    6.72    1.58
 -12   3  -5    6.05    1.55
   3  12   6   17.07    1.75
  -3 -12   6   15.46    0.58
  -3 -12   6   15.16    2.08
 -12   3   6   13.15    2.19
  12  -3   6   15.08    2.36
  -3 -12  -6   14.78    1.95
 -12   3  -6   13.17    2.08
  12  -3  -6   16.02    2.06
 -12   3   7    6.17    2.05
  -3 -12   7    8.62    0.60
  -3 -12   7    7.61    1.87
   3  12   7    5.77    1.57
  12  -3  -7    6.29    1.85
  -3 -12  -7    7.87    1.77
 -12   3   8    1.07    2.76
  -3 -12   8    2.46    1.63
   3  12   8    3.89    2.11
  12  -3  -8    2.36    1.50
  -3 -12  -8    4.42    1.51
   3  12   9    7.26    1.59
  -3 -12   9    7.52    2.98
 -12   3   9    7.49    2.12
  12  -3  -9    5.96    1.89
 -12   3  -9    6.41    2.14
  -3 -12  -9    8.19    2.79
   3  12  10    1.70    1.20
  -3 -12  10    1.88    2.36
 -12   3  10    1.08    1.64
  -3 -12 -10    2.38    2.28
  12  -3 -10    1.56    1.42
  -3 -12  11    3.53    1.79
   3  12  11    3.50    1.40
  12  -3 -11    2.48    1.69
  -3 -12 -11    2.75    1.72
   3  12  12    1.83    2.00
  -3 -12  12    2.11    1.68
  -3 -12 -12    1.71    1.54
  12  -3 -12    0.82    1.58
   3  12  13    1.27    1.96
  -3 -12  13   -0.67    1.65
  12  -3 -13   -0.09    1.49
  -3 -12 -13    2.09    1.45
   3  12  14    1.13    1.79
  -3 -12  14    0.22    2.39
  -3 -12 -14   -0.43    1.34
  12  -3 -14    0.24    1.40
   3  12  15   -0.06    2.25
  -3 -12  15    2.89    1.99
  -3 -12 -15    2.39    1.75
  12  -3 -15   -1.18    1.70
  13  -3   0   27.54    1.50
 -13   3   0   27.56    1.90
  -3 -13   0   27.34    1.92
 -13   3   0   26.69    1.40
 -13   3   1   60.18    2.91
 -13   3   1   54.51    2.51
  13  -3   1   56.47    2.49
  -3 -13   1   57.76    2.79
  13  -3  -1   58.21    1.99
 -13   3  -1   54.22    2.38
 -13   3  -1   59.49    2.66
  -3 -13  -1   56.59    2.82
 -13   3   2  123.34    4.90
  13  -3   2  120.43    4.66
 -13   3   2  129.70    3.80
  -3 -13   2  120.81    4.58
 -13   3  -2  124.08    5.48
  -3 -13  -2  117.42    4.61
 -13   3  -2  113.68    4.37
  13  -3  -2  125.08    3.14
  13  -3   3   22.75    2.09
 -13   3   3   25.61    2.24
  -3 -13   3   26.56    3.28
   3  13   3   25.47    2.89
  -3 -13   3   24.17    1.94
 -13   3   3   25.04    0.74
  13  -3  -3   25.02    0.69
  -3 -13  -3   23.19    1.99
 -13   3  -3   23.58    1.93
  -3 -13   4   -0.37    0.73
  13  -3   4   -0.41    0.74
 -13   3   4    0.81    0.74
   3  13   4   -0.13    0.62
  -3 -13  -4   -0.11    1.10
  13  -3  -4   -0.33    0.73
 -13   3  -4    0.41    0.66
  -3 -13   5    3.10    1.38
  -3 -13   5    2.75    0.33
 -13   3   5    1.33    1.37
   3  13   5    1.91    1.15
 -13   3  -5    3.34    1.26
  13  -3  -5    2.67    1.32
  -3 -13  -5    2.80    1.22
 -13   3   6    0.82    1.21
   3  13   6    0.66    0.91
  -3 -13   6    0.25    0.37
  -3 -13   6    0.01    1.11
  -3 -13  -6    0.16    1.02
  13  -3  -6    1.00    1.06
  -3 -13   7   -1.42    1.81
  -3 -13   7    0.23    0.25
   3  13   7    0.14    0.92
 -13   3   7    0.34    1.89
  13  -3  -7    0.69    1.70
  -3 -13  -7    0.40    1.02
 -13   3   8    1.47    1.67
  -3 -13   8    2.15    2.37
   3  13   8    3.17    1.26
  13  -3  -8    1.32    1.45
  -3 -13  -8    2.87    1.42
  -3 -13   9    2.46    1.62
   3  13   9    2.71    1.27
 -13   3   9    3.23    1.79
  -3 -13  -9    2.58    1.50
  13  -3  -9    3.65    1.51
 -13   3  -9    2.91    1.63
 -13   3  10   23.54    2.93
   3  13  10   22.09    3.45
  -3 -13  10   21.74    2.92
  -3 -13 -10   22.60    2.84
  13  -3 -10   20.44    2.75
  -3 -13  11    0.74    1.67
   3  13  11    1.49    1.24
 -13   3  11    1.87    1.64
  13  -3 -11    0.42    1.55
  -3 -13 -11    2.77    1.59
   3  13  12    0.54    0.92
  -3 -13  12   -0.64    1.27
  13  -3 -12   -0.22    1.11
  -3 -13 -12    0.08    1.10
   3  13  13    0.71    1.41
  -3 -13  13    5.81    3.05
  -3 -13 -13    2.32    1.69
  13  -3 -13   -0.41    2.71
  -3 -13  14    5.98    2.65
   3  13  14    4.66    1.89
  -3 -13 -14    1.99    3.58
  13  -3 -14    6.00    2.24
  -3 -13  15    7.66    2.27
   3  13  15   -1.06    1.67
  13  -3 -15    2.69    1.89
  -3 -13 -15    1.13    3.11
  -3 -14   0    0.02    0.81
 -14   3   0   -0.90    0.54
  14  -3   0    0.36    0.95
 -14   3   0   -0.02    0.79
 -14   3   1   -0.21    0.71
 -14   3   1   -0.22    0.81
  -3 -14   1    0.27    0.78
  14  -3   1    0.47    1.06
  14  -3  -1    0.16    0.47
  -3 -14  -1    0.08    0.81
 -14   3  -1   -0.82    1.24
 -14   3  -1    1.01    0.61
  -3 -14   2   56.46    3.15
  14  -3   2   55.58    3.01
 -14   3   2   59.40    2.41
 -14   3   2   61.77    3.29
  -3 -14   2   58.06    3.04
  14  -3  -2   60.14    1.85
 -14   3  -2   54.94    2.76
 -14   3  -2   59.83    2.83
  -3 -14  -2   57.62    3.06
 -14   3   3    3.09    0.37
   3  14   3    1.85    1.12
  -3 -14   3    3.35    1.32
  -3 -14   3    3.00    1.88
 -14   3   3    2.22    1.31
 -14   3  -3    3.94    1.00
 -14   3  -3    1.90    1.11
  14  -3  -3    3.12    0.35
  -3 -14  -3    2.44    1.18
  -3 -14   4   36.63    2.82
  -3 -14   4   35.51    2.55
 -14   3   4   35.84    2.81
   3  14   4   37.07    2.41
 -14   3  -4   35.16    2.53
  -3 -14  -4   32.46    2.47
 -14   3   5   12.80    3.33
  -3 -14   5   14.64    2.04
  14  -3   5   11.10    2.15
  -3 -14   5   11.94    0.80
   3  14   5   15.82    2.64
 -14   3  -5   12.48    1.91
  -3 -14  -5   13.70    2.86
  14  -3  -5    9.17    2.01
  -3 -14   6   53.42    1.27
  14  -3   6   49.54    4.02
   3  14   6   55.20    3.27
  -3 -14   6   56.30    5.62
 -14   3   6   51.77    5.75
  -3 -14  -6   54.35    5.10
  14  -3  -6   52.28    3.62
   3  14   7   21.52    3.36
  -3 -14   7   22.39    4.11
 -14   3   7   19.74    2.87
  -3 -14  -7   21.36    2.45
  14  -3  -7   22.61    2.53
 -14   3   8    0.15    1.27
  -3 -14   8    0.53    1.18
   3  14   8    0.30    0.96
  -3 -14  -8    0.98    1.11
  14  -3  -8    0.07    1.15
  -3 -14   9    4.85    1.86
 -14   3   9    5.18    1.82
   3  14   9    3.05    2.18
  -3 -14  -9    4.83    1.69
  14  -3  -9    5.19    2.80
 -14   3  -9    3.01    1.78
 -14   3  10    3.95    2.98
   3  14  10    3.62    1.40
  -3 -14  10    4.33    1.88
  -3 -14 -10    0.99    1.80
  14  -3 -10    2.60    1.75
   3  14  11   -0.65    0.98
  -3 -14  11    1.03    1.36
 -14   3  11    0.96    1.33
  -3 -14 -11    1.32    2.07
  14  -3 -11   -0.13    1.27
  -3 -14  12    1.66    2.43
   3  14  12    0.20    1.10
  14  -3 -12    0.29    1.36
  -3 -14 -12   -0.15    2.19
   3  14  13    1.00    1.37
  -3 -14  13    3.76    1.90
  -3 -14 -13   -0.15    2.70
  14  -3 -13    0.16    1.74
  -3 -14  14    2.63    2.57
   3  14  14    6.69    1.76
  -3 -14 -14    5.48    2.29
  14  -3 -14    0.15    2.19
 -15   3   0    0.33    0.61
  15  -3   0    0.66    0.64
  -3 -15   0   -0.31    0.90
 -15   3   0    0.47    1.42
  15  -3   1   38.84    2.28
 -15   3   1   43.81    2.75
 -15   3   1   41.78    2.44
  -3 -15   1   40.88    2.70
  15  -3  -1   43.28    2.53
  -3 -15  -1   37.62    2.66
 -15   3  -1   39.75    2.18
 -15   3  -1   42.50    2.61
  -3 -15   2   30.61    2.49
  -3 -15   2   25.42    3.46
 -15   3   2   31.11    1.78
 -15   3   2   32.36    2.54
 -15   3  -2   30.73    2.19
  -3 -15  -2   29.67    2.39
  15  -3  -2   31.50    1.29
 -15   3  -2   27.49    2.03
  15  -3   3    3.51    1.25
  -3 -15   3    1.78    1.22
  -3 -15   3    1.95    1.37
 -15   3   3    2.12    0.63
 -15   3   3    4.22    1.41
 -15   3  -3    3.80    1.14
  -3 -15  -3    3.63    1.24
  15  -3  -3    3.23    0.57
 -15   3  -3    3.10    1.07
   3  15   4    2.41    1.22
 -15   3   4    3.16    1.54
  -3 -15   4    3.13    1.49
  -3 -15   4    3.14    1.30
 -15   3   4    3.01    0.23
  -3 -15  -4    3.27    1.31
 -15   3  -4    1.85    1.30
   3  15   5    4.59    1.38
  -3 -15   5    5.67    1.66
  -3 -15   5    3.48    0.40
  15  -3  -5    5.41    1.69
 -15   3  -5    4.21    1.51
  -3 -15  -5    3.78    1.47
   3  15   6    8.71    2.72
  -3 -15   6    8.07    3.31
 -15   3   6    7.23    2.17
  -3 -15   6    9.85    0.64
  15  -3  -6    7.87    2.08
  -3 -15  -6    8.17    1.87
  -3 -15   7    3.64    1.70
   3  15   7    3.23    1.28
 -15   3   7    1.88    1.80
  -3 -15  -7    4.38    2.28
  15  -3  -7    1.51    2.49
  -3 -15   8    0.27    1.21
 -15   3   8   -0.09    1.18
   3  15   8   -0.13    1.42
  -3 -15  -8   -1.43    1.65
  15  -3  -8   -0.20    1.11
  -3 -15   9    9.17    2.25
 -15   3   9    4.68    3.30
   3  15   9    8.92    1.64
 -15   3  -9   -0.01    2.02
  -3 -15  -9   10.05    3.05
  15  -3  -9    7.63    2.05
   3  15  10    1.24    1.18
 -15   3  10    0.01    1.50
  -3 -15  10    0.31    1.53
  -3 -15 -10    1.56    2.34
  15  -3 -10    1.41    1.35
  -3 -15  11    4.22    2.02
   3  15  11    3.54    2.27
 -15   3  11    4.52    2.08
  -3 -15 -11    5.54    1.96
  15  -3 -11   -0.45    1.93
  -3 -15  12    4.71    2.93
   3  15  12    4.88    2.30
 -15   3  12    0.35    1.68
  -3 -15 -12   -0.02    1.80
  15  -3 -12    0.73    2.71
   3  15  13    4.25    1.71
  -3 -15  13    8.38    2.49
  15  -3 -13    0.84    3.38
  -3 -15 -13    0.07    2.16
  -3 -15  14    3.74    2.57
   3  15  14    2.23    1.67
  -3 -15 -14    4.12    2.14
  15  -3 -14    1.19    3.21
 -16   3   0   -2.22    1.37
 -16   3   0    0.54    0.56
  -3 -16   0    0.52    0.78
  16  -3   0   -1.14    0.99
 -16   3   1   14.61    1.97
  -3 -16   1   13.91    2.96
  16  -3   1   12.45    1.55
 -16   3   1   12.56    1.15
 -16   3  -1   14.41    1.86
  -3 -16  -1   13.73    1.88
 -16   3  -1   11.36    1.45
  16  -3  -1   15.17    1.17
  -3 -16   2    6.16    1.52
 -16   3   2    4.47    1.08
 -16   3   2    5.28    1.56
  -3 -16   2    6.21    1.48
  16  -3   2    4.92    1.29
  -3 -16  -2    4.52    1.45
 -16   3  -2    5.18    1.20
  16  -3  -2    5.21    1.08
 -16   3  -2    4.59    1.34
  -3 -16   3    9.75    2.05
  -3 -16   3   12.41    1.88
 -16   3   3   12.69    1.10
 -16   3   3   12.40    2.13
  16  -3  -3   11.53    0.91
  -3 -16  -3   14.88    1.82
 -16   3  -3   13.09    1.67
 -16   3  -3   11.41    2.57
  -3 -16   4    2.72    1.28
 -16   3   4    0.35    1.37
   3  16   4    0.14    1.05
  -3 -16   4    0.67    1.13
  -3 -16  -4    2.89    1.15
 -16   3  -4   -1.31    1.08
 -16   3  -4    0.96    0.96
  -3 -16   5   14.76    2.11
  -3 -16   5   15.31    2.37
  16  -3   5    9.95    2.20
 -16   3   5   12.57    3.58
   3  16   5   11.15    1.75
  -3 -16  -5   12.97    2.02
 -16   3  -5   11.80    2.07
  -3 -16   6   48.30    1.35
  -3 -16   6   49.49    5.51
 -16   3   6   47.91    3.74
   3  16   6   47.66    3.02
  -3 -16  -6   41.95    3.26
  16  -3  -6   44.26    3.60
 -16   3   7   18.69    2.73
   3  16   7   20.16    3.34
  -3 -16   7   20.98    2.92
  16  -3  -7   20.05    2.80
  -3 -16  -7   21.70    2.46
  -3 -16   8    8.63    2.33
 -16   3   8    9.33    3.39
   3  16   8    7.27    1.67
  16  -3  -8    5.77    2.08
  -3 -16  -8    7.83    1.91
   3  16   9   20.45    2.36
  -3 -16   9   23.58    3.12
 -16   3   9   19.92    2.98
  16  -3  -9   23.31    4.26
  -3 -16  -9   21.09    2.90
 -16   3  -9   18.65    2.82
  -3 -16  10    1.44    1.35
 -16   3  10   -1.21    1.31
   3  16  10   -0.88    1.54
  16  -3 -10   -0.31    1.19
  -3 -16 -10   -0.02    1.29
   3  16  11    0.04    1.24
  -3 -16  11    1.73    2.56
 -16   3  11    2.53    1.48
  -3 -16 -11   -0.01    1.58
  16  -3 -11   -0.35    1.54
  -3 -16  12    0.49    1.71
   3  16  12    1.17    1.23
 -16   3  12    0.25    1.47
  16  -3 -12    0.13    1.53
  -3 -16 -12    0.00    1.61
  -3 -16  13    3.54    1.96
   3  16  13    0.01    1.28
  -3 -16 -13    0.16    1.65
  16  -3 -13   -0.03    1.58
  -3 -16  14    0.41    1.65
   3  16  14    1.97    1.11
  -3 -16 -14   -3.23    1.38
  -3 -17   0    1.21    1.80
 -17   3   0    0.50    1.19
 -17   3   0    2.00    1.17
  17  -3   0    0.45    0.78
  -3 -17   1   -0.30    1.84
 -17   3   1    3.84    0.93
 -17   3   1    3.98    2.60
  -3 -17   1    6.05    1.61
  17  -3   1    6.35    1.28
 -17   3  -1    7.80    1.19
 -17   3  -1    5.33    1.55
  17  -3  -1    7.92    1.48
  -3 -17  -1    6.50    1.60
  17  -3   2    0.23    1.70
 -17   3   2    0.49    0.93
 -17   3   2    1.50    1.30
  -3 -17   2    1.07    1.25
  -3 -17   2    1.86    1.24
 -17   3  -2    1.59    1.13
  -3 -17  -2    1.28    1.18
  17  -3  -2    1.12    0.55
 -17   3  -2    2.55    0.97
  -3 -17   3    5.84    1.85
 -17   3   3    7.93    1.88
 -17   3   3    8.76    1.00
  17  -3   3    6.97    1.61
  -3 -17   3    8.00    1.66
  17  -3  -3    5.90    0.55
  -3 -17  -3    4.65    1.65
 -17   3  -3    7.34    1.52
 -17   3  -3    7.87    1.49
 -17   3   4    1.74    1.23
  -3 -17   4    0.36    1.18
 -17   3   4    0.31    0.27
  -3 -17   4   -0.24    1.74
  -3 -17  -4    0.90    1.04
 -17   3  -4   -0.55    0.96
 -17   3  -4    0.98    0.91
 -17   3   5    2.26    1.43
   3  17   5    1.13    1.13
  -3 -17   5    0.01    1.56
  -3 -17   5    1.71    1.21
  -3 -17  -5    2.86    1.28
  -3 -17   6    7.97    0.37
   3  17   6    8.27    2.52
 -17   3   6    8.31    2.06
  -3 -17   6    7.75    3.47
  -3 -17  -6    7.81    1.83
 -17   3   7    3.13    1.59
   3  17   7    1.07    1.27
  -3 -17   7    1.00    1.77
  -3 -17  -7    2.21    1.42
   3  17   8    2.40    1.34
  -3 -17   8    3.20    1.94
 -17   3   8    4.21    2.80
  17  -3  -8    1.38    1.61
  -3 -17  -8    1.50    1.57
 -17   3   9    2.84    1.56
   3  17   9    1.49    1.19
  -3 -17   9    1.02    1.68
  17  -3  -9   -0.73    1.42
  -3 -17  -9   -0.33    1.52
  -3 -17  10    7.61    2.23
   3  17  10    4.95    1.64
 -17   3  10    9.39    2.22
  17  -3 -10   -0.29    1.90
  -3 -17 -10   -0.09    2.10
 -17   3  11    1.13    2.78
   3  17  11    2.06    1.39
  -3 -17  11    1.27    1.86
  -3 -17 -11   -0.14    1.79
  17  -3 -11    0.95    2.74
   3  17  12   -0.82    1.53
  -3 -17  12   -0.29    1.31
 -17   3  12    0.62    1.21
  -3 -17 -12   -0.10    1.28
  17  -3 -12    0.71    1.92
   3  17  13   -1.72    1.92
  -3 -17  13    1.13    1.85
  -3 -17 -13   -0.03    2.47
  17  -3 -13   -0.58    2.38
  18  -3   0   -0.96    0.90
  -3 -18   0    1.03    1.28
 -18   3   0    0.45    0.83
 -18   3   0   -0.04    0.85
  18  -3   1    5.07    1.16
  -3 -18   1    3.71    1.54
  -3 -18   1    4.70    1.52
 -18   3   1    3.09    2.44
 -18   3   1    4.38    0.94
  18  -3  -1    3.83    0.94
 -18   3  -1    4.00    1.83
  -3 -18  -1    3.98    2.35
 -18   3  -1    5.26    1.53
 -18   3   2    4.74    1.30
  -3 -18   2    6.77    2.60
  -3 -18   2    3.64    1.69
 -18   3   2    4.88    1.68
  18  -3   2    4.93    1.37
 -18   3  -2    5.42    1.34
 -18   3  -2    3.43    2.48
  -3 -18  -2    3.86    1.56
  18  -3  -2    4.12    1.17
  -3 -18   3    3.62    1.69
  -3 -18   3    3.13    2.28
 -18   3   3    3.36    1.58
 -18   3   3    3.63    0.60
  18  -3   3    2.96    2.35
  18  -3  -3    3.81    0.49
 -18   3  -3    3.18    1.38
  -3 -18  -3    3.51    1.46
 -18   3  -3    2.16    1.32
 -18   3   4    9.68    0.61
  -3 -18   4    8.89    2.24
  18  -3   4   10.04    1.98
  -3 -18   4    9.62    1.84
 -18   3   4    9.94    3.27
 -18   3  -4   12.12    1.69
  -3 -18  -4   12.14    1.90
  -3 -18   5   -0.22    1.28
  -3 -18   5   -0.38    1.01
 -18   3   5    0.80    1.16
 -18   3  -5    0.48    0.86
  -3 -18  -5    0.42    1.05
  -3 -18   6   41.92    1.01
 -18   3   6   43.55    3.77
  -3 -18   6   45.54    3.32
   3  18   6   43.76    3.10
  -3 -18   6   47.40    6.15
  -3 -18  -6   40.52    3.27
   3  18   7   -0.19    1.12
 -18   3   7    1.64    1.42
  -3 -18   7    0.78    1.53
  -3 -18  -7    0.78    1.24
  -3 -18   8    0.81    1.74
   3  18   8    2.11    1.25
 -18   3   8    2.68    1.61
 -18   3  -8    0.02    1.62
  -3 -18  -8    0.02    1.53
 -18   3   9    1.91    1.61
  -3 -18   9    1.01    1.66
   3  18   9    0.56    1.12
  -3 -18  -9    0.10    1.46
  18  -3  -9   -0.27    1.39
 -18   3  10    9.06    2.38
   3  18  10    9.79    2.74
  -3 -18  10    8.07    3.86
  18  -3 -10    0.39    2.09
  -3 -18 -10   -0.02    2.25
  -3 -18  11   -2.08    1.47
 -18   3  11    0.46    1.39
   3  18  11   -0.07    1.07
  18  -3 -11    0.97    1.35
  -3 -18 -11    0.13    2.30
  -3 -18  12    0.11    1.72
   3  18  12   -0.11    1.25
 -18   3  12    1.98    1.58
  18  -3 -12    0.07    1.57
  -3 -18 -12    0.00    2.53
  19  -3   0    3.77    1.06
 -19   3   0    4.26    1.08
 -19   3   0    4.14    1.58
  -3 -19   0    2.96    1.47
 -19   3   1    5.03    0.96
  -3 -19   1    4.88    1.58
  -3 -19   1    3.42    1.43
  19  -3   1    2.68    1.16
 -19   3   1    2.56    2.52
  19  -3  -1    2.67    1.45
  -3 -19  -1    4.54    2.32
 -19   3  -1    2.58    1.79
 -19   3  -1    2.99    1.51
 -19   3   2   10.23    2.15
  19  -3   2   10.52    2.75
  -3 -19   2   12.50    1.97
  -3 -19   2   11.29    2.19
 -19   3   2   11.97    1.16
 -19   3  -2   10.33    2.03
 -19   3  -2    9.96    2.65
  -3 -19  -2   12.12    1.92
  19  -3  -2   11.74    1.00
  19  -3   3    0.03    0.91
  -3 -19   3    0.34    1.00
 -19   3   3    0.08    0.40
  -3 -19   3   -0.73    1.13
 -19   3   3   -0.09    1.08
  19  -3  -3    0.31    0.50
 -19   3  -3    1.87    1.39
  -3 -19  -3   -0.20    0.92
 -19   3  -3   -0.15    0.92
  -3 -19   4    1.36    1.51
 -19   3   4    1.06    0.39
 -19   3   4   -0.21    2.29
  19  -3   4    0.95    2.00
  -3 -19   4    2.02    1.20
  -3 -19  -4    1.85    1.23
 -19   3  -4    0.91    1.88
 -19   3   5    1.32    1.46
  -3 -19   5    1.84    1.51
  -3 -19   5   -0.36    2.00
 -19   3  -5    1.52    1.13
  -3 -19  -5   -0.33    1.28
  -3 -19   6    2.71    2.79
  -3 -19   6    1.19    0.22
 -19   3   6    2.33    1.62
  -3 -19   6    1.18    0.30
  -3 -19   6    1.99    1.36
 -19   3  -6    2.92    1.16
  -3 -19  -6    1.09    1.38
   3  19   7    6.70    1.67
  -3 -19   7    6.75    1.87
 -19   3   7    9.48    3.48
  -3 -19   7   -0.15    2.35
  -3 -19  -7    9.08    1.95
 -19   3   8    0.40    1.51
  -3 -19   8    1.29    1.54
   3  19   8    0.33    1.07
 -19   3  -8    0.06    1.35
  -3 -19  -8   -0.03    1.36
 -19   3   9   -1.59    1.70
   3  19   9    0.09    1.92
  -3 -19   9   -1.14    1.75
  -3 -19  -9    0.06    1.56
 -19   3  10    3.34    3.37
   3  19  10    2.02    1.53
  -3 -19  10    3.46    3.30
  -3 -19 -10   -0.20    3.15
   3  19  11    0.21    1.26
  -3 -19  11    1.78    1.79
 -19   3  11   -0.01    1.65
  -3 -19 -11    0.03    2.59
   3  19  12    0.53    1.33
 -19   3  12    1.18    1.79
  -3 -19  12    0.96    1.87
  -3 -19 -12    0.30    1.71
  19  -3 -12    0.15    1.69
  20  -3   0    0.33    1.09
 -20   3   0   -0.52    1.02
  -3 -20   0    0.15    0.98
 -20   3   0    0.38    0.73
  -3 -20   1   -0.20    1.01
 -20   3   1    0.95    0.98
  -3 -20   1   -0.40    0.94
  20  -3   1    0.65    0.72
 -20   3   1    0.40    1.04
 -20   3  -1    0.69    0.75
  -3 -20  -1    0.25    0.93
  20  -3  -1   -0.86    0.56
  20  -3   2    2.38    1.27
 -20   3   2    3.67    0.82
  -3 -20   2    4.29    1.67
 -20   3   2    0.48    1.66
  20  -3  -2    2.86    1.12
 -20   3  -2    2.48    1.46
 -20   3  -2    3.00    1.20
  -3 -20  -2    1.25    2.29
  -3 -20   3    1.74    1.28
 -20   3   3    0.20    1.49
  20  -3   3    1.67    2.04
 -20   3   3    1.22    0.82
 -20   3  -3    0.47    1.71
  20  -3  -3    1.16    0.42
  -3 -20  -3    0.59    1.23
  -3 -20   4   11.04    2.58
 -20   3   4   13.83    0.82
  20  -3   4   16.63    2.27
 -20   3   4    0.11    2.60
  -3 -20   4   15.20    2.21
 -20   3  -4   17.82    2.10
 -20   3  -4   12.06    2.95
  -3 -20  -4   14.89    2.27
  -3 -20   5   -0.47    1.38
 -20   3   5   -0.67    1.36
  -3 -20   5    1.22    1.13
  -3 -20   5    0.05    0.41
 -20   3  -5    1.39    1.13
 -20   3  -5    0.86    1.69
  -3 -20  -5    1.57    1.20
 -20   3   6   -0.65    1.30
  -3 -20   6    0.01    1.49
  20  -3   6   -0.98    2.10
  -3 -20   6    0.80    1.81
  -3 -20  -6    0.91    1.16
 -20   3  -6    0.67    1.00
 -20   3   7    1.30    2.05
  -3 -20   7   -0.74    1.07
  -3 -20   7    0.01    1.33
  -3 -20  -7    0.15    1.12
 -20   3  -7    0.01    1.11
  -3 -20   8    2.13    2.15
 -20   3   8    2.39    2.07
   3  20   8    3.28    1.47
  -3 -20   8    2.92    1.72
  -3 -20  -8    0.09    1.85
  -3 -20   9   -1.31    1.55
 -20   3   9   -0.95    1.48
   3  20   9    1.21    1.02
  -3 -20  -9   -0.07    2.16
   3  20  10    0.37    1.18
 -20   3  10    0.87    2.62
  -3 -20  10   -0.84    2.63
  -3 -20 -10    0.09    2.37
 -20   3  11    0.44    1.99
   3  20  11    4.70    2.29
  -3 -20  11    0.67    2.11
  -3 -20 -11    0.02    1.95
 -21   3   0   16.46    1.81
  -3 -21   0   15.94    2.31
 -21   3   0   14.81    2.53
  21  -3   0   17.68    1.69
  -3 -21   0   13.60    2.30
 -21   3   1   -0.03    1.61
  21  -3   1    1.72    1.13
 -21   3   1    2.29    0.95
 -21   3  -1    2.16    1.19
  -3 -21  -1    4.92    1.41
  21  -3  -1    2.45    1.40
 -21   3  -1   -0.18    1.52
  21  -3   2    0.61    1.25
  -3 -21   2   -0.83    0.90
 -21   3   2    0.55    0.81
 -21   3   2   -0.33    1.62
  -3 -21   2    0.00    0.95
  -3 -21  -2   -1.09    1.47
  21  -3  -2   -0.12    0.44
 -21   3  -2   -0.21    0.92
 -21   3  -2    0.62    0.74
 -21   3   3   -0.09    0.75
 -21   3   3   -0.18    1.30
  21  -3   3   -1.39    1.04
  -3 -21   3   -0.37    1.10
  -3 -21   3    0.47    1.27
 -21   3  -3    0.00    1.11
  21  -3  -3    0.03    0.54
  -3 -21  -3   -0.44    1.12
 -21   3  -3   -0.74    0.92
 -21   3   4    4.87    0.40
  -3 -21   4    0.01    2.14
 -21   3   4    0.12    2.07
  21  -3   4    6.40    3.08
  -3 -21   4    7.60    1.80
 -21   3  -4    0.22    1.76
 -21   3  -4    5.69    1.70
  -3 -21  -4    7.14    1.88
  21  -3   5    0.07    0.93
 -21   3   5    0.92    0.99
  -3 -21   5    0.15    0.46
  -3 -21   5    0.08    1.08
  -3 -21   5   -0.83    0.82
 -21   3  -5    0.15    0.73
  -3 -21  -5   -0.59    0.91
 -21   3  -5   -0.09    0.84
 -21   3   6    0.45    1.41
  -3 -21   6    0.88    1.24
  -3 -21   6   -0.01    1.61
 -21   3  -6    0.15    1.04
  -3 -21  -6    1.15    1.26
 -21   3  -6    0.02    1.11
  -3 -21   7    0.71    1.24
 -21   3   7    1.32    2.36
  -3 -21   7   -0.08    2.51
 -21   3  -7    0.02    1.04
  -3 -21  -7    0.00    1.36
  -3 -21   8    6.41    2.09
  -3 -21   8    5.72    2.62
 -21   3   8    7.51    2.58
  -3 -21  -8    0.23    3.60
 -21   3   9   -0.86    1.79
  -3 -21   9   -0.41    1.82
  -3 -21   9   -0.53    1.53
  -3 -21  -9    0.13    2.51
   3  21  10    0.36    1.33
 -21   3  10    4.56    3.10
  -3 -21  10   -0.08    3.01
  -3 -21 -10   -0.05    1.76
  -3 -22   0   -0.88    1.07
  -3 -22   0   -0.04    1.19
 -22   3   0   -0.61    1.41
  22  -3   0    0.29    1.28
 -22   3   1   -0.94    0.72
 -22   3   1    0.12    1.25
  22  -3   1   -0.49    1.33
 -22   3  -1    0.77    0.87
  22  -3  -1    0.07    0.65
  -3 -22  -1   -0.67    1.09
 -22   3  -1   -0.07    1.20
 -22   3   2    0.43    0.71
  -3 -22   2    0.08    1.31
 -22   3   2    0.01    2.27
  -3 -22   2    0.34    1.14
  22  -3   2   -0.13    1.03
 -22   3  -2    0.24    1.26
  -3 -22  -2    3.42    1.26
  22  -3  -2    0.85    0.94
 -22   3  -2   -0.42    1.05
 -22   3   3    0.87    0.56
  22  -3   3    0.21    1.21
  -3 -22   3    0.04    1.52
 -22   3   3    0.24    1.30
 -22   3  -3    0.49    1.11
  -3 -22  -3   -0.46    2.12
 -22   3  -3   -0.01    1.30
  22  -3  -3    0.79    0.40
  -3 -22   4   11.69    1.23
  -3 -22   4   14.03    2.30
 -22   3   4   15.71    2.57
  22  -3   4   10.06    2.38
 -22   3  -4   12.36    2.01
 -22   3  -4    0.31    3.46
  -3 -22  -4   13.61    2.47
 -22   3   5   -0.31    1.50
  -3 -22   5    0.05    1.59
  -3 -22   5    0.63    2.04
  22  -3   5    1.24    2.04
 -22   3  -5   -0.04    1.26
  -3 -22  -5    3.18    1.37
 -22   3  -5   -0.17    1.06
  22  -3   6   -0.57    1.30
  -3 -22   6    0.16    1.47
 -22   3   6   -0.25    1.34
  -3 -22   6   -0.18    1.12
 -22   3  -6    0.06    0.99
 -22   3  -6    0.01    1.70
  -3 -22  -6    1.18    1.01
 -22   3   7    1.62    2.82
  -3 -22   7   -0.01    3.00
  -3 -22   7    3.65    1.59
 -22   3  -7   -0.04    1.30
  -3 -22  -7    0.01    1.68
  -3 -22   8    4.16    2.12
  -3 -22   8    2.81    1.73
 -22   3   8    0.57    2.13
 -22   3  -8   -0.02    1.38
  -3 -22   9    2.98    2.15
  -3 -22   9    4.01    1.73
 -22   3   9    0.07    2.18
  -3 -22  -9    0.25    1.88
 -22   3  -9   -0.03    1.33
 -23   3   0    0.17    0.98
  23  -3   0    1.00    0.88
  -3 -23   1    5.88    1.74
 -23   3   1    5.94    1.39
  23  -3   1    5.91    1.47
 -23   3   1    0.28    1.94
  -3 -23   1   -0.08    1.99
 -23   3  -1    5.28    2.40
  23  -3  -1    8.13    1.12
 -23   3  -1    0.01    1.67
  -3 -23  -1    9.71    1.74
 -23   3   2    0.62    0.75
 -23   3   2   -0.05    1.31
  23  -3   2    0.72    1.04
  -3 -23   2    1.36    1.14
  23  -3  -2    0.09    0.57
 -23   3  -2    0.78    1.09
  -3 -23  -2    0.23    1.04
  23  -3   3    3.60    1.41
 -23   3   3    0.03    1.65
  -3 -23   3    0.03    1.82
  -3 -23   3    0.70    0.95
  -3 -23   3    4.97    1.52
 -23   3  -3    0.13    1.31
 -23   3  -3    4.26    1.55
 -23   3   4   -0.32    1.49
  23  -3   4    1.27    1.30
  -3 -23   4   -0.16    1.59
  -3 -23   4    1.53    1.29
 -23   3  -4   -0.18    1.09
  -3 -23  -4    0.49    1.11
 -23   3   5   -0.12    1.43
  -3 -23   5   -0.07    1.66
  -3 -23   5    1.50    1.19
  23  -3   5   -0.15    1.20
 -23   3  -5   -0.04    1.15
 -23   3  -5    0.06    1.00
  -3 -23  -5   -0.05    1.06
  -3 -23   6    0.16    1.51
 -23   3   6    0.65    1.32
  23  -3   6   -0.17    1.15
  -3 -23   6   -0.32    1.08
 -23   3  -6    0.10    1.04
  -3 -23  -6    0.14    1.19
 -23   3  -6   -0.08    1.00
  -3 -23   7   -0.32    2.55
  23  -3   7    0.41    2.27
 -23   3   7   -1.83    2.68
  -3 -23   7    0.57    1.36
  -3 -23  -7    0.05    1.40
 -23   3  -7    0.01    1.74
 -23   3  -7    0.51    1.78
  23  -3   8    0.11    1.64
 -23   3   8   -2.06    1.93
  -3 -23   8    0.98    1.88
  -3 -23   8   -1.76    1.63
 -23   3  -8    0.00    1.21
 -23   3  -8    0.30    1.87
  -3 -24   0   -0.31    1.19
 -24   3   0    1.14    0.96
  24  -3   0   -0.56    1.26
 -24   3   0    0.20    1.30
 -24   3   1   -0.46    1.36
 -24   3   1    1.23    1.47
  24  -3   1    0.74    1.54
  -3 -24   1    0.13    1.21
  -3 -24   1   -0.16    1.42
 -24   3  -1    0.15    1.15
  -3 -24  -1    0.24    1.20
  24  -3  -1    0.36    0.73
 -24   3  -1    1.50    1.06
  -3 -24  -1    0.14    1.27
  -3 -24   2    0.58    0.81
 -24   3   2    0.46    1.20
  24  -3   2   -0.23    0.92
 -24   3  -2   -0.01    0.97
  -3 -24  -2   -1.00    0.97
 -24   3  -2   -0.81    1.55
  -3 -24   3    0.07    2.07
 -24   3   3    0.40    1.73
  24  -3   3    2.51    1.41
  -3 -24   3    2.69    1.58
  -3 -24  -3    2.56    2.24
 -24   3  -3    0.44    2.45
 -24   3   4    0.02    1.88
  24  -3   4    3.88    1.48
  -3 -24   4    0.33    2.16
 -24   3  -4   -0.06    1.67
  -3 -24  -4    2.52    1.40
 -24   3  -4   -0.35    2.51
  -3 -24   5    3.70    1.65
  24  -3   5   -0.22    1.61
 -24   3   5    0.22    3.03
 -24   3  -5    0.18    2.22
  -3 -24  -5    2.16    1.46
  24  -3   6    0.04    1.41
  -3 -24   6   -0.03    1.92
  -3 -24   6    0.86    1.36
 -24   3   6    0.94    1.79
 -24   3  -6   -0.01    1.99
 -24   3  -6   -0.05    1.27
  -3 -24  -6    0.15    1.51
  24  -3   7   -0.01    1.88
 -24   3   7    3.82    3.89
  -3 -24   7    3.14    2.29
  -3 -24   7    4.35    1.91
 -24   3  -7   -0.03    1.59
 -24   3  -7   -0.10    2.52
 -25   3   0    7.78    2.73
 -25   3   0    0.13    2.30
  -3 -25   0   -0.95    1.91
  -3 -25   0   10.85    2.10
  25  -3   0   11.28    1.44
  25  -3   1    0.12    1.04
  -3 -25   1    0.48    1.12
  -3 -25   1   -0.34    1.64
  25  -3  -1    0.22    0.73
 -25   3  -1    2.16    1.13
 -25   3   2   -0.28    1.34
  -3 -25   2   -1.17    1.17
  -3 -25   2   -0.36    1.58
  -3 -25   2    0.55    0.88
  25  -3   2    0.32    1.04
 -25   3  -2    0.15    1.11
 -25   3  -2   -0.33    1.10
  -3 -25  -2   -0.96    1.08
  25  -3   3    0.09    1.17
 -25   3   3   -0.08    2.33
 -25   3  -3   -0.27    1.33
  -3 -25  -3    1.93    1.49
  25  -3   4    0.16    1.20
  -3 -25   4    0.60    1.81
 -25   3   4    0.19    1.53
 -25   3  -4   -0.02    1.41
  -3 -25  -4    0.92    1.85
 -25   3  -4    0.05    1.31
  25  -3   5    0.13    1.28
  -3 -25   5    0.12    3.02
  -3 -25   5   -1.63    1.51
 -25   3  -5    0.01    1.35
 -25   3  -5   -0.08    1.14
  -3 -25  -5   -0.12    1.23
 -25   3  -6   -0.02    1.82
  26  -3   0    0.76    1.29
 -26   3   0   -0.01    1.43
  -3 -26   0   -0.23    1.19
  -3 -26   0    0.59    1.55
  -3 -26   0    0.26    1.52
  26  -3   1    0.51    1.49
  -3 -26   1   -0.56    1.03
 -26   3  -1    0.16    1.79
  -3 -26  -1   -0.41    1.30
  26  -3   2    0.65    1.05
  -3 -26   2   -0.44    1.44
 -26   3   2    0.24    1.61
  -3 -26   2    0.07    1.65
  -3 -26  -2   -0.05    1.36
 -26   3  -2   -0.09    1.14
 -26   3  -2   -0.39    1.12
  -3 -26  -2    1.17    1.13
  -3 -26  -2   -0.53    1.30
 -26   3   3    0.04    3.26
  26  -3   3    1.81    1.33
  -3 -26  -3    0.11    1.65
 -26   3  -3   -0.19    1.37
  -3 -26  -3    1.07    1.78
 -26   3  -3    0.63    1.43
  -3 -26  -3    0.95    1.42
  -4   0   0    8.10    0.53
   4   0   0    8.98    0.79
   0   4   1  136.30    2.91
  -4   0   1  142.95    2.86
  -4   0   1  139.56    3.13
   0  -4   1  137.02    3.78
   4   0   1  137.35    3.31
   4   0  -1  139.31    3.11
   4   0  -1  141.81    2.69
   0  -4  -1  130.80    2.83
  -4   0  -1  140.84    3.46
   0   4   2   66.25    2.48
  -4   0   2   65.54    2.78
  -4   0   2   62.78    1.21
   4   0   2   63.04    2.26
   0  -4   2   64.58    2.07
   4   0  -2   61.57    1.87
   0  -4  -2   63.22    1.85
   0   4  -2   63.36    1.93
  -4   0  -2   64.00    2.28
  -4   0   3 1333.27   40.78
   0   4   3 1301.04   37.18
   0  -4   3 1300.58   38.87
  -4   0   3 1347.62   35.50
   4   0   3 1274.26   39.22
  -4   0  -3 1290.82   39.43
   0  -4  -3 1315.97   37.71
   0   4  -3 1303.49   32.05
   0   4  -3 1325.21   38.87
   4   0  -3 1277.46   37.51
   0   4   4   61.30    1.98
  -4   0   4   60.08    1.71
   4   0   4   60.26    3.46
  -4   0   4   60.07    2.15
   0  -4   4   60.53    2.27
   4   0  -4   56.62    1.99
   0   4  -4   61.29    2.14
   0  -4  -4   61.34    2.72
   4   0  -4   62.60    1.59
   0   4  -4   60.60    1.30
  -4   0  -4   61.46    2.49
   4   0   5    0.96    1.30
  -4   0   5    1.47    0.57
   0   4   5    1.56    0.57
  -4   0   5    1.46    0.68
   0  -4   5    1.38    0.70
  -4   0  -5    0.47    0.79
   4   0  -5    0.64    0.31
   0   4  -5    1.15    0.26
   0  -4  -5    1.25    0.58
   4   0  -5    0.87    0.61
   0   4  -5    1.35    0.64
  -4   0   6   82.31    2.78
   4   0   6   76.64    4.47
   0   4   6   82.10    3.60
   0  -4   6   84.55    3.13
  -4   0   6   84.49    3.05
   4   0  -6   76.30    2.67
   4   0  -6   79.13    2.10
  -4   0  -6   77.66    4.42
   0   4  -6   83.22    3.00
   0   4  -6   80.35    1.96
   0  -4  -6   85.92    2.85
   0  -4   7   26.61    1.87
   4   0   7   24.42    1.97
  -4   0   7   25.55    1.19
   0   4   7   23.83    1.52
  -4   0  -7   25.56    1.89
   4   0  -7   23.21    2.37
   4   0  -7   24.57    1.10
   0  -4  -7   25.28    1.55
   0   4  -7   24.99    1.03
   0   4  -7   25.30    1.68
  -4   0   8   62.96    2.24
   0   4   8   58.54    2.54
   0  -4   8   63.69    3.06
   4   0   8   62.86    3.35
   0  -4  -8   58.53    2.61
   4   0  -8   58.96    2.05
   0   4  -8   63.57    1.97
   4   0  -8   60.75    2.67
   0   4  -8   62.75    2.81
   4   0   9   -0.43    0.81
  -4   0   9    0.43    0.79
   0   4   9    0.29    0.61
   0  -4   9   -0.10    1.22
   4   0  -9    0.24    0.43
  -4   0  -9    0.05    0.79
   4   0  -9   -0.66    0.64
   0   4  -9   -0.96    0.65
   0   4  -9    0.17    0.42
   0  -4  -9    0.02    0.60
  -4   0  10    2.82    0.91
   0   4  10    1.96    1.76
   0  -4  10    1.94    1.34
   4   0 -10    3.25    0.80
   0  -4 -10    2.72    1.01
   0   4 -10    1.99    0.78
   4   0 -10    2.90    1.15
   0   4 -10    1.65    1.13
  -4   0  11    1.03    0.77
   0   4  11    0.91    0.89
   0  -4  11   -0.21    1.14
   0  -4 -11    0.55    1.18
  -4   0 -11    0.18    1.07
   0  -4 -11    0.67    1.39
   4   0 -11    0.04    0.65
   4   0 -11    0.05    1.46
   0   4 -11    0.47    0.94
   0  -4  12   15.92    3.71
   4   0  12   15.82    2.43
   0   4  12   16.76    1.92
  -4   0  12   15.52    1.77
   0   4 -12   18.24    1.48
   4   0 -12   16.75    1.57
   0  -4 -12   16.88    1.90
   4   0 -12   15.21    3.06
   0   4 -12   15.94    1.99
   4   0  13    1.46    1.27
  -4   0  13    0.16    0.87
   0  -4  13    0.03    1.22
   0   4  13    0.44    0.99
   0   4 -13   -0.03    0.76
   4   0 -13    0.20    1.03
   0  -4 -13    1.46    0.95
   0   4 -13    0.62    1.53
   4   0 -13    0.07    1.18
  -4   0  14    0.53    0.89
   0   4  14    0.45    1.03
   0  -4  14    0.84    1.25
   0   4 -14   -0.54    0.97
   4   0 -14    0.32    0.78
   4   0 -14    0.36    1.05
   0  -4 -14    0.63    1.53
   0   4 -14    0.13    1.25
  -4   0  15   -0.24    1.07
   0  -4  15   -1.12    1.53
   4   0  15    1.63    1.53
   0   4  15    1.11    1.93
   0  -4 -15    1.14    1.12
  -4   0 -15    1.48    1.25
   4   0 -15    1.50    0.93
   4   0 -15    1.29    1.25
   0   4 -15   -0.07    0.94
   0   4 -15    1.29    1.16
   4   0  16   -1.05    1.54
   0  -4  16    0.31    1.53
  -4   0  16    0.37    1.14
   0   4  16    1.12    1.20
   0  -4 -16   -1.25    1.87
   4   0 -16    0.73    1.47
  -4   0 -16    0.50    1.27
   0   4 -16    1.61    1.20
   4   0 -16    1.24    1.93
   0   4 -16    0.07    1.49
   0   4  17    0.24    1.40
   0  -4  17    0.64    1.73
  -4   0  17    0.51    1.29
   4   0  17    2.13    1.73
  -4   0 -17    0.40    1.51
   4   0 -17    0.35    1.06
   4   0 -17    0.81    1.28
   0  -4 -17    0.76    1.42
   0   4 -17   -0.13    0.99
   0   4 -17    4.05    1.31
   4   1   0   -0.13    0.29
  -4  -1   0   -0.26    0.49
  -4  -1   1   74.64    1.83
   1  -4   1   76.18    1.37
   1  -4   1   72.78    1.93
  -4  -1   1   75.65    1.94
   4   1   1   72.94    2.10
  -1   4  -1   72.06    2.48
   4   1  -1   76.18    1.82
   1  -4  -1   72.22    1.61
  -4  -1  -1   75.07    2.16
  -4  -1   2  214.21    4.40
   4   1   2  213.49    5.70
  -4  -1   2  210.85    4.98
  -1   4   2  203.07    4.36
   1  -4   2  218.43    6.50
  -4  -1  -2  215.07    5.75
  -1   4  -2  218.15    6.33
   1  -4  -2  213.95    4.59
   4   1  -2  212.30    4.92
  -1   4   3  188.07    4.25
  -4  -1   3  194.74    5.75
   4   1   3  182.98    6.64
   1  -4   3  191.19    5.27
  -4  -1   3  192.21    4.29
   1  -4  -3  200.70    4.60
  -4  -1  -3  200.40    5.67
  -1   4  -3  195.14    5.19
   4   1  -3  191.32    4.68
  -4  -1   4    3.92    0.46
  -4  -1   4    3.96    1.19
   4   1   4    4.79    0.98
  -1   4   4    4.65    0.60
   1  -4   4    4.49    0.91
   4   1  -4    4.40    0.39
  -1   4  -4    4.49    0.25
  -4  -1  -4    5.11    0.97
   1  -4  -4    5.42    1.02
  -1   4  -4    5.64    0.86
   4   1  -4    4.95    0.68
   4   1   5    1.02    0.79
  -4  -1   5    1.07    0.62
  -4  -1   5    1.69    0.40
   1  -4   5    0.07    0.75
  -1   4   5    0.03    0.78
   4   1  -5    1.14    0.54
   4   1  -5    0.79    0.56
  -4  -1  -5    0.84    0.77
   1  -4  -5    0.22    0.86
  -1   4  -5    1.04    0.41
  -1   4  -5    1.35    0.67
  -4  -1   6   50.99    2.25
  -4  -1   6   51.79    3.00
   1  -4   6   48.04    2.42
  -1   4   6   50.50    1.87
   4   1   6   46.85    2.52
  -4  -1  -6   49.83    3.67
   4   1  -6   51.95    2.78
   4   1  -6   50.13    2.06
   1  -4  -6   51.18    1.94
  -1   4  -6   49.10    3.21
  -1   4  -6   49.45    1.36
  -1   4   7   20.47    1.27
  -4  -1   7   19.89    1.70
   4   1   7   19.37    1.79
   1  -4   7   19.97    2.66
   4   1  -7   19.59    1.35
  -4  -1  -7   19.94    1.79
   4   1  -7   20.19    1.04
   1  -4  -7   20.10    1.90
  -1   4  -7   17.86    2.41
  -1   4  -7   20.24    0.92
   4   1   8  138.45    5.52
  -4  -1   8  148.87    5.43
  -1   4   8  138.36    4.43
   1  -4   8  151.36    5.71
   4   1  -8  143.49    4.19
   4   1  -8  145.33    4.76
   1  -4  -8  143.32    5.66
   1  -4  -8  141.95    5.71
  -1   4  -8  154.71    4.87
  -1   4  -8  144.99    6.73
   4   1   9    1.95    1.17
  -1   4   9    1.87    0.84
   1  -4   9    2.25    1.17
  -4  -1   9    1.49    0.77
  -1   4  -9    1.69    1.62
   4   1  -9    2.00    1.04
  -1   4  -9    1.55    0.62
  -4  -1  -9    1.12    1.09
   1  -4  -9    1.08    1.33
   4   1  -9    0.83    0.86
   1  -4  -9    0.84    1.22
  -4  -1  10    0.39    0.62
   4   1  10   -0.65    0.89
  -1   4  10    1.68    0.67
   1  -4  10    0.11    1.47
   4   1 -10   -0.29    0.68
   4   1 -10    0.07    0.53
  -1   4 -10   -0.96    0.52
   1  -4 -10    0.61    0.62
  -1   4 -10    0.01    1.24
   1  -4  11   -0.32    0.98
  -4  -1  11    0.20    0.67
  -1   4  11   -0.98    0.68
  -1   4 -11    0.11    0.77
   1  -4 -11    0.27    0.67
   4   1 -11    0.39    0.56
   4   1 -11   -0.21    0.69
  -4  -1  12    1.07    0.88
  -1   4  12    0.67    0.89
   1  -4  12    0.03    1.23
  -1   4 -12    0.56    0.71
   4   1 -12   -0.61    0.90
   1  -4 -12    1.47    1.26
  -1   4 -12    0.14    1.03
   1  -4 -12    0.71    1.52
   4   1 -12    0.09    0.74
  -1   4  13    1.14    0.88
  -4  -1  13    0.90    0.87
   4   1  13   -1.43    1.18
   1  -4  13    0.13    1.23
   4   1 -13    0.28    0.73
   4   1 -13   -0.19    0.90
   1  -4 -13   -0.13    0.89
  -1   4 -13    0.55    0.98
  -1   4  14    5.46    1.41
   1  -4  14    6.28    1.90
  -4  -1  14    5.28    2.18
   4   1 -14    4.79    2.28
  -1   4 -14    4.38    2.39
   1  -4 -14    5.49    1.34
  -1   4 -14   -0.01    1.18
   4   1 -14    3.65    1.86
   4   1  15    1.84    2.52
  -4  -1  15   -0.02    1.20
   1  -4  15    0.50    1.61
  -1   4  15    1.09    1.84
   4   1 -15    1.26    0.96
   1  -4 -15    0.99    1.77
  -4  -1 -15    2.53    1.34
  -1   4 -15    0.90    1.25
   4   1 -15    1.70    1.21
  -4  -1  16    0.30    2.25
   4   1  16    2.10    1.88
   1  -4  16    5.63    1.98
  -1   4  16    0.28    1.40
  -1   4 -16    0.08    1.17
  -1   4 -16    2.45    1.45
  -4  -1 -16    3.17    1.68
   4   1 -16    2.52    1.39
   4   1 -16    2.66    1.16
   1  -4 -16    2.30    1.36
   4   1  17    0.19    1.31
  -1   4  17    0.12    0.98
  -4  -1  17    0.41    1.04
  -4  -1 -17   -1.33    1.10
  -1   4 -17    0.05    0.80
  -1   4 -17    0.89    1.02
   4   1 -17    0.09    0.96
   1  -4 -17   -0.10    1.57
   4   1 -17   -0.22    1.33
   4   2   0   74.09    1.87
  -2   4   0   78.22    1.88
   2  -4   0   75.08    1.83
  -4  -2   0   76.00    2.02
   2  -4   0   75.81    2.27
   2  -4   1   48.58    1.02
   4   2   1   48.51    1.75
  -4  -2   1   49.42    1.77
   2  -4   1   48.62    1.56
   2  -4  -1   49.05    1.69
  -2   4  -1   49.47    1.55
   4   2  -1   48.30    1.23
  -2   4  -1   48.36    1.04
   2  -4  -1   50.35    1.18
  -4  -2  -1   49.33    1.82
   4   2   2  220.76    7.33
   2  -4   2  215.17    5.60
  -4  -2   2  212.78    5.68
  -4  -2   2  202.97    4.21
  -2   4   2  211.21    4.24
   2  -4  -2  213.92    7.02
  -4  -2  -2  220.11    5.93
   2  -4  -2  213.08    4.34
  -2   4  -2  218.74    5.52
  -2   4   3  284.15    6.07
   4   2   3  278.69    7.82
  -4  -2   3  281.18    6.19
   2  -4   3  275.60    7.53
  -4  -2   3  276.05    6.63
   2  -4  -3  285.92    6.90
  -2   4  -3  285.98    7.64
   2  -4  -3  280.38    7.85
   4   2  -3  289.55    6.81
  -4  -2  -3  280.01    7.78
  -4  -2   4  200.25    5.94
   4   2   4  196.04    7.01
   2  -4   4  201.06    7.29
  -2   4   4  194.64    4.33
  -4  -2   4  202.88    4.67
   4   2  -4  199.01    4.36
   2  -4  -4  201.15    6.10
   2  -4  -4  205.05    5.37
  -4  -2  -4  196.50    7.31
   4   2  -4  195.15    4.79
  -2   4  -4  197.67    6.88
   4   2   5   42.35    2.16
  -4  -2   5   45.00    1.50
  -2   4   5   42.57    1.38
   2  -4   5   43.90    3.22
  -4  -2   5   44.91    2.42
   4   2  -5   42.14    1.55
   4   2  -5   41.96    1.74
   2  -4  -5   44.28    1.49
  -4  -2  -5   40.47    3.26
  -2   4  -5   42.47    2.13
   2  -4  -5   47.62    2.35
   4   2   6   91.31    3.64
  -4  -2   6   98.40    2.84
  -4  -2   6   97.99    3.17
  -2   4   6   96.14    2.69
   2  -4   6   94.85    3.77
  -4  -2  -6   95.68    3.76
   4   2  -6   94.04    3.66
   4   2  -6   96.24    3.21
   2  -4  -6   97.03    3.87
  -2   4  -6   96.29    3.59
   2  -4  -6   97.03    3.52
  -4  -2   7    0.35    0.47
   4   2   7   -0.24    0.70
  -4  -2   7   -0.18    0.54
  -2   4   7   -0.97    0.72
   2  -4   7    0.60    0.74
   2  -4  -7    0.03    0.44
  -2   4  -7    1.14    0.65
  -4  -2  -7    0.20    0.71
   4   2  -7    0.00    0.40
   4   2  -7    0.08    0.46
   4   2   8    3.21    1.21
   2  -4   8    2.78    1.31
  -4  -2   8    3.37    0.82
  -2   4   8    2.80    0.79
  -4  -2  -8    1.98    1.23
  -2   4  -8    1.99    1.11
   4   2  -8    1.80    1.34
   4   2  -8    3.47    0.70
  -2   4  -8    2.51    0.63
   2  -4  -8    3.75    0.78
  -2   4   9    0.08    0.61
   2  -4   9   -0.32    0.95
   4   2   9   -0.36    0.89
  -4  -2   9    0.32    0.66
   2  -4  -9   -0.03    0.96
   4   2  -9   -1.28    1.03
   4   2  -9   -0.57    0.85
  -2   4  -9    0.02    0.78
  -2   4  -9   -1.06    0.83
   2  -4  -9   -0.05    0.57
  -2   4  10    0.77    0.84
  -4  -2  10    1.08    0.92
   2  -4  10    2.87    1.33
   4   2  10    1.60    1.24
   2  -4 -10    0.95    1.30
   4   2 -10    3.17    1.39
   2  -4 -10    1.12    0.81
   4   2 -10    1.79    1.19
  -2   4 -10    2.72    1.10
  -4  -2 -10    0.86    1.15
  -2   4 -10    0.88    0.72
   2  -4  11    2.67    2.28
  -4  -2  11    1.31    1.03
  -2   4  11    1.78    0.94
   4   2  11    0.30    1.36
  -2   4 -11    1.18    1.18
   4   2 -11    1.82    1.49
   4   2 -11    1.02    1.29
   2  -4 -11    1.20    1.42
  -4  -2  12   33.06    2.36
  -2   4  12   29.97    2.14
   2  -4  12   27.35    3.15
   2  -4 -12   32.75    2.24
   4   2 -12   30.23    2.94
   4   2 -12   30.09    3.25
  -2   4 -12   31.74    1.99
  -2   4 -12   33.49    4.04
  -4  -2  13    1.05    1.18
  -2   4  13    0.41    1.02
   2  -4  13    2.13    2.50
   4   2 -13    2.52    0.95
   2  -4 -13    1.73    1.02
  -2   4 -13    1.57    1.30
   4   2 -13    2.06    1.06
  -2   4  14    1.25    1.58
  -4  -2  14    0.91    1.75
   2  -4  14    1.70    1.48
   4   2 -14    1.11    0.90
   4   2 -14    0.91    1.01
  -2   4 -14    0.04    0.88
  -2   4 -14   -0.15    1.17
   2  -4 -14    0.91    0.96
  -2   4  15    0.11    0.99
   4   2  15   -0.19    1.35
   2  -4  15    2.54    2.44
  -4  -2  15    0.36    1.12
   4   2 -15    1.02    0.97
   2  -4 -15   -0.29    0.93
   4   2 -15    0.89    0.87
  -2   4 -15   -0.83    1.14
  -4  -2 -15    1.88    1.26
  -2   4  16   -0.22    1.24
  -4  -2  16    0.48    1.33
   2  -4  16    3.16    1.81
   4   2  16    4.91    2.64
  -4  -2 -16    0.90    1.46
   4   2 -16    0.08    1.87
   4   2 -16    1.40    1.81
  -2   4 -16    3.99    2.10
   2  -4 -16   -0.26    1.83
   4   2  17    1.01    1.69
  -4  -2  17   -0.11    2.22
   2  -4  17    8.18    2.96
  -2   4  17   -0.01    1.24
  -4  -2 -17    4.09    1.81
   4   2 -17    0.01    1.14
  -2   4 -17    0.10    1.02
   4   2 -17    1.41    1.11
  -2   4 -17    1.77    1.30
   2  -4 -17   -0.75    1.20
   3  -4   0    0.12    0.33
   4   3   0    1.19    0.41
  -4  -3   0   -0.18    0.74
  -3   4   0    0.01    0.31
  -3   4   0   -0.40    0.36
   3  -4   0    0.73    0.58
   4   3   1  174.52    4.51
  -4  -3   1  174.60    4.70
  -3   4   1  168.01    4.34
   3  -4   1  167.19    4.21
   3  -4   1  169.11    3.33
   3  -4  -1  165.55    5.15
   4   3  -1  167.37    3.74
   3  -4  -1  176.32    3.54
  -4  -3  -1  179.98    4.65
  -3   4  -1  176.42    3.58
  -3   4  -1  179.04    5.12
  -4  -3   2  119.37    3.23
  -3   4   2  117.38    3.47
   4   3   2  116.52    3.52
  -4  -3   2  113.32    2.62
   3  -4   2  114.40    3.38
   3  -4  -2  115.80    4.42
  -4  -3  -2  115.90    3.60
   3  -4  -2  114.64    2.48
  -3   4  -2  113.96    2.26
  -3   4  -2  120.00    3.32
  -4  -3   3  382.27    8.91
  -4  -3   3  373.79    8.82
   4   3   3  376.39   10.23
  -3   4   3  379.36    8.26
   3  -4   3  384.73   11.86
   3  -4  -3  394.49    8.32
   3  -4  -3  378.80   10.43
  -4  -3  -3  384.97   10.53
  -3   4  -3  376.93   10.21
  -3   4   4  129.83    2.71
  -4  -3   4  136.24    4.08
   4   3   4  133.98    4.29
  -4  -3   4  138.52    4.22
   3  -4   4  135.89    4.44
   3  -4  -4  138.74    3.01
  -4  -3  -4  138.44    4.42
   3  -4  -4  133.08    5.54
   4   3  -4  138.10    3.32
  -3   4  -4  136.64    4.29
  -3   4   5  497.59   11.93
   4   3   5  503.86   16.59
  -4  -3   5  510.71   13.44
  -4  -3   5  509.72   13.41
   3  -4   5  516.98   15.52
   4   3  -5  499.76   13.65
  -4  -3  -5  511.04   15.03
   4   3  -5  503.70   13.58
   3  -4  -5  533.65   13.84
   3  -4  -5  526.29   17.34
  -3   4  -5  521.43   16.84
   4   3   6   11.80    1.47
  -3   4   6   12.85    1.17
  -4  -3   6   13.42    1.51
  -4  -3   6   12.99    1.56
   3  -4   6   12.82    1.52
   3  -4  -6   11.33    1.18
   3  -4  -6   15.04    1.57
   4   3  -6   12.71    1.28
  -4  -3  -6   15.01    1.53
   4   3  -6   14.00    1.32
  -3   4  -6   12.12    1.44
  -3   4   7   86.26    2.48
  -4  -3   7   86.63    2.92
  -4  -3   7   84.93    2.89
   4   3   7   87.23    3.62
   3  -4   7   85.18    5.08
   3  -4  -7   80.95    3.17
   4   3  -7   85.50    2.67
  -4  -3  -7   89.70    3.71
   4   3  -7   82.19    2.61
  -3   4  -7   85.91    3.60
  -3   4   8   65.71    2.91
   4   3   8   61.99    3.22
  -4  -3   8   61.67    2.55
   3  -4   8   60.26    3.43
  -4  -3  -8   61.00    3.14
   4   3  -8   62.33    3.18
   3  -4  -8   58.53    2.10
   4   3  -8   60.91    3.01
  -3   4  -8   63.74    4.39
  -3   4   9   19.70    1.38
   4   3   9   20.45    2.18
  -4  -3   9   24.43    1.72
   3  -4   9   21.45    2.37
   3  -4  -9   20.80    1.97
   4   3  -9   20.98    1.48
   4   3  -9   23.27    1.48
   3  -4  -9   21.88    2.21
  -3   4  -9   21.65    3.16
  -3   4  10    6.86    1.08
   4   3  10    6.29    1.73
  -4  -3  10    7.09    1.33
   3  -4  10    5.78    1.90
   4   3 -10    7.04    1.12
   3  -4 -10    7.23    1.74
   3  -4 -10    7.96    1.05
   4   3 -10    7.25    1.08
  -3   4 -10    7.37    1.60
  -3   4 -10    7.28    1.02
   4   3  11   -0.48    1.01
  -3   4  11    0.43    0.62
  -4  -3  11   -0.53    0.76
   3  -4  11    0.04    1.12
  -4  -3 -11    0.15    0.91
   4   3 -11    0.35    0.63
   3  -4 -11   -0.20    0.61
   4   3 -11   -0.85    0.63
  -3   4 -11    0.33    0.95
  -4  -3  12    2.34    1.62
  -3   4  12    0.60    0.85
   4   3  12    0.19    1.25
   3  -4  12   -0.10    1.43
   3  -4 -12    0.55    0.81
   4   3 -12    2.19    0.86
   4   3 -12    1.04    0.84
  -3   4 -12    1.09    0.82
  -3   4 -12    0.42    1.17
  -3   4  13    0.45    1.35
  -4  -3  13    1.07    1.07
   3  -4  13    0.37    1.46
   3  -4 -13   -0.48    0.85
   4   3 -13    0.87    0.85
   4   3 -13    1.24    0.87
  -3   4 -13    1.91    1.84
  -4  -3  14    1.41    1.08
   3  -4  14   -0.40    1.45
  -3   4  14    0.31    1.33
  -3   4 -14    0.37    1.10
   4   3 -14    0.60    1.37
   4   3 -14    0.31    1.45
   3  -4 -14    0.07    0.84
  -3   4  15   -0.01    0.98
   4   3  15    2.11    1.54
  -4  -3  15    0.78    2.02
   3  -4  15    3.57    1.75
  -4  -3 -15   -1.42    1.44
   3  -4 -15   -0.16    1.55
   4   3 -15    2.27    1.03
   4   3 -15    0.73    1.02
  -3   4 -15    0.30    1.30
  -3   4  16   -0.16    1.45
   4   3  16    8.58    2.05
  -4  -3  16    1.11    1.77
   3  -4  16    7.81    2.39
  -3   4 -16    8.57    1.67
   3  -4 -16   -0.20    1.36
   4   3 -16   -0.01    1.39
  -4  -3 -16    8.11    1.85
   4   3 -16    5.90    1.46
  -3   4  17    0.00    1.79
   4   3  17    1.52    1.63
  -4  -3  17    0.47    1.38
   3  -4  17    0.33    2.96
   4   3 -17    0.17    1.12
  -3   4 -17    1.71    1.28
   4   3 -17    0.99    1.10
   3  -4 -17   -0.21    1.68
  -4  -3 -17    4.63    3.31
  -3   4 -17    0.03    1.04
  -4   4   0    0.76    0.37
   4  -4   0    0.72    0.39
  -4  -4   0    1.53    0.92
   4   4   0    0.74    0.52
  -4   4   0    0.18    0.72
   4  -4   0    0.75    0.71
  -4  -4   1  141.85    3.43
   4  -4   1  146.28    4.59
   4   4   1  150.79    4.96
  -4   4   1  142.92    3.77
   4  -4   1  139.99    3.43
  -4   4  -1  146.67    3.68
   4  -4  -1  149.19    3.02
   4  -4  -1  144.17    4.66
  -4   4  -1  146.21    3.11
   4   4  -1  143.86    3.41
  -4  -4  -1  147.30    4.02
  -4  -4   2  115.05    3.40
   4   4   2  116.93    3.36
  -4   4   2  108.87    4.20
   4  -4   2  117.03    4.33
   4  -4  -2  113.37    2.28
   4  -4  -2  110.73    3.29
  -4  -4  -2  115.55    3.46
  -4   4  -2  112.38    2.54
  -4   4  -2  115.70    3.33
   4  -4  -2  114.03    2.24
   4  -4   3   22.00    2.27
   4   4   3   21.96    1.49
  -4   4   3   22.12    2.26
  -4  -4   3   23.36    1.58
  -4  -4   3   22.67    0.93
  -4  -4  -3   25.48    2.38
   4  -4  -3   23.11    0.76
  -4   4  -3   24.26    2.18
   4  -4  -3   22.85    2.25
  -4   4   4   20.76    1.64
   4  -4   4   23.56    1.67
  -4  -4   4   22.53    1.44
  -4   4   4   20.82    0.56
   4   4   4   20.48    1.54
  -4  -4   4   21.35    1.10
  -4   4  -4   20.24    1.57
   4  -4  -4   22.15    0.89
  -4  -4  -4   19.90    1.57
   4  -4  -4   20.82    1.58
   4   4   5   19.63    1.60
  -4   4   5   19.43    0.65
   4  -4   5   18.69    1.78
  -4  -4   5   19.53    1.21
  -4  -4   5   18.82    1.03
   4   4  -5   18.41    0.89
   4   4  -5   19.71    1.05
  -4   4  -5   19.34    1.62
   4  -4  -5   18.17    1.03
   4  -4  -5   18.89    1.66
  -4  -4  -5   19.11    1.67
  -4  -4   6    1.52    0.58
   4  -4   6    1.81    1.66
   4   4   6    0.97    0.95
  -4  -4   6    2.69    1.06
  -4   4   6    1.69    0.64
   4   4  -6    1.77    0.56
  -4   4  -6    1.32    0.95
  -4  -4  -6    1.23    0.98
   4  -4  -6    1.75    0.63
   4  -4  -6   -0.59    1.54
   4   4  -6    1.70    0.49
  -4  -4   7    7.76    1.38
   4  -4   7    8.36    1.50
  -4   4   7    7.96    0.98
  -4  -4   7    6.68    0.98
   4   4   7    6.12    1.33
   4   4  -7    6.06    0.72
   4  -4  -7    7.74    0.97
   4   4  -7    6.92    0.82
  -4   4  -7    7.67    1.31
   4  -4  -7    7.51    2.18
  -4  -4  -7    6.85    1.37
  -4   4   8    3.77    0.64
   4   4   8    5.58    1.32
  -4  -4   8    4.94    0.99
   4  -4   8    4.33    2.29
   4   4  -8    3.99    0.84
  -4  -4  -8    4.48    1.30
  -4   4  -8    3.15    1.29
   4  -4  -8    2.19    2.23
   4  -4  -8    4.70    1.02
   4   4  -8    4.86    1.11
  -4  -4   9   14.90    1.52
  -4   4   9   11.89    1.55
   4  -4   9   12.94    2.08
   4   4   9   12.89    2.91
  -4   4  -9   13.93    1.81
   4   4  -9   11.57    1.08
   4  -4  -9   13.01    1.57
  -4  -4  -9   12.85    1.85
   4  -4  -9   12.48    3.04
   4   4  -9   13.33    1.22
   4   4  10   23.07    3.76
   4  -4  10   26.09    4.37
  -4   4  10   24.20    2.24
  -4  -4  10   26.02    2.02
   4  -4 -10   23.81    1.49
   4  -4 -10   21.88    2.50
   4   4 -10   23.07    1.55
   4   4 -10   22.89    1.69
  -4   4 -10   20.84    2.47
   4  -4  11   26.30    3.05
  -4  -4  11   25.72    2.31
  -4   4  11   30.09    2.59
  -4   4 -11   27.14    4.03
   4   4 -11   24.69    1.89
  -4  -4 -11   23.78    2.56
   4  -4 -11   27.24    2.83
   4  -4 -11   28.86    1.71
   4   4 -11   28.51    1.75
   4  -4  12    2.02    1.69
  -4   4  12    0.16    0.84
  -4  -4  12    0.01    0.76
   4   4 -12   -0.05    0.55
   4   4 -12   -0.76    0.60
  -4   4 -12    0.52    0.59
  -4  -4 -12    0.28    0.83
   4  -4 -12    0.88    0.85
  -4   4 -12   -0.11    0.88
   4  -4 -12   -1.29    0.93
   4   4  13   16.28    2.51
  -4   4  13   17.83    1.62
   4  -4  13   18.66    3.05
  -4  -4  13   22.22    3.49
  -4   4 -13   21.20    1.85
   4   4 -13   17.03    1.85
  -4   4 -13   17.78    2.43
   4  -4 -13   21.13    1.76
   4   4 -13   21.14    1.76
   4   4  14    1.82    1.38
  -4  -4  14    1.95    1.31
   4  -4  14    1.65    1.65
  -4   4  14   -0.09    0.89
   4   4 -14    1.54    0.90
  -4   4 -14    1.32    2.08
   4  -4 -14    0.04    1.44
   4   4 -14    1.43    0.99
   4  -4 -14   -0.01    1.38
  -4  -4  15   14.40    2.22
   4  -4  15   11.76    2.94
   4   4  15   10.24    2.41
  -4   4  15   13.32    1.64
   4  -4 -15   10.46    1.56
   4   4 -15    9.02    1.76
  -4  -4 -15   11.41    2.18
   4  -4 -15   -0.06    2.51
  -4   4 -15   10.83    2.17
   4   4 -15   -0.05    2.48
  -4   4  16    0.17    1.58
   4   4  16    0.33    2.30
  -4  -4  16    0.55    2.07
   4  -4  16    2.17    1.80
   4  -4 -16    0.00    0.91
   4   4 -16    0.03    1.48
   4   4 -16    0.28    1.08
  -4  -4 -16    2.11    2.46
  -4   4 -16    1.84    1.30
  -4   4 -16    0.14    0.98
   4   4  17    1.28    1.17
   4  -4  17    4.20    1.41
  -4   4  17    0.13    0.76
  -4  -4  17    0.51    1.06
  -4  -4 -17   -0.50    1.64
   4   4 -17   -0.06    0.74
   4   4 -17   -1.06    1.31
  -4   4 -17   -1.03    1.02
   4  -4 -17   -2.18    1.14
   4  -4 -17   -0.06    0.73
  -4   4 -17    0.07    1.20
   4   5   0    0.12    0.38
  -5   4   0   -0.18    0.34
   5  -4   0   -0.66    0.32
   5  -4   0   -0.07    0.30
  -5   4   0    0.42    0.28
  -4  -5   0    0.21    0.41
  -5   4   1   19.83    1.14
   5  -4   1   19.07    1.11
  -5   4   1   19.26    0.60
   4   5   1   20.86    1.19
  -4  -5   1   20.01    1.56
  -4  -5  -1   18.50    1.28
  -5   4  -1   19.70    1.03
  -5   4  -1   18.14    0.81
   5  -4  -1   17.76    1.07
   5  -4  -1   19.30    0.68
   4   5  -1   20.28    1.01
   5  -4   2   21.61    1.32
   4   5   2   22.20    1.34
  -4  -5   2   20.39    1.52
  -5   4   2   20.85    1.29
  -5   4  -2   21.51    1.23
  -5   4  -2   22.01    0.73
   5  -4  -2   20.66    1.26
   5  -4  -2   21.54    0.72
  -4  -5  -2   22.02    1.42
   4   5   3   39.89    1.85
   5  -4   3   41.55    2.01
  -5   4   3   37.33    1.84
  -4  -5   3   40.46    1.58
  -4  -5   3   41.83    1.54
  -4  -5  -3   38.85    2.77
  -5   4  -3   38.71    1.84
   5  -4  -3   39.20    0.78
   5  -4  -3   39.13    1.86
   5  -4   4  533.36   15.81
  -5   4   4  527.33   10.90
  -5   4   4  508.15   14.70
   4   5   4  505.41   14.28
  -4  -5   4  531.25   13.67
  -4  -5   4  532.25   13.93
  -5   4  -4  504.01   16.18
   5  -4  -4  409.67    9.07
   5  -4  -4  518.16   14.98
  -4  -5  -4  519.30   14.93
  -4  -5   5   27.37    1.10
   5  -4   5   23.36    3.09
  -5   4   5   26.01    0.62
   4   5   5   26.11    1.81
  -4  -5   5   26.43    1.42
  -5   4   5   25.40    1.95
  -5   4  -5   22.20    2.79
   5  -4  -5   26.75    1.85
   5  -4  -5   25.45    0.68
  -4  -5  -5   26.49    1.88
   4   5   6    1.61    0.99
  -5   4   6    2.12    0.49
  -4  -5   6    2.45    0.77
   5  -4   6    3.26    1.14
  -4  -5   6    2.70    0.88
  -5   4  -6    2.13    1.65
   5  -4  -6    1.78    1.62
   5  -4  -6    2.05    0.53
   4   5  -6    2.34    0.64
   4   5  -6    2.03    0.44
  -4  -5  -6    2.22    1.66
   5  -4   7   18.17    3.02
  -5   4   7   18.27    1.08
   4   5   7   14.32    1.69
  -4  -5   7   17.43    1.09
  -4  -5   7   15.51    1.35
  -4  -5  -7   16.90    2.80
  -5   4  -7   15.24    2.66
   5  -4  -7   14.68    0.75
   4   5  -7   16.37    1.30
   5  -4  -7   15.85    1.73
   4   5  -7   14.29    1.75
  -5   4   8   41.96    1.93
  -4  -5   8   41.04    2.26
   4   5   8   40.60    2.67
   5  -4   8   40.39    3.01
  -5   4  -8   36.34    2.66
   5  -4  -8   40.89    1.43
   5  -4  -8   41.79    2.74
  -4  -5  -8   42.09    2.84
   4   5  -8   42.76    2.01
   4   5  -8   39.04    1.54
   4   5   9    5.17    2.55
   5  -4   9    5.62    1.76
  -4  -5   9    6.52    1.27
  -5   4   9    5.55    0.72
  -5   4  -9    4.30    1.55
   5  -4  -9    6.08    1.12
   5  -4  -9    5.65    1.62
  -4  -5  -9    3.76    1.64
   4   5  -9    7.01    1.58
   4   5  -9    4.12    0.78
   5  -4  10    0.75    0.95
  -5   4  10   -0.21    0.39
  -4  -5  10   -0.51    0.66
   4   5  10    0.58    1.34
   4   5 -10    0.13    0.88
   5  -4 -10    0.19    0.38
  -5   4 -10    0.09    0.79
   5  -4 -10   -0.32    1.37
  -4  -5 -10    0.43    0.76
   4   5 -10   -0.13    0.42
   5  -4  11    7.84    2.23
  -5   4  11    8.37    1.01
  -4  -5  11    8.28    1.58
   4   5 -11    8.17    1.04
   5  -4 -11    6.63    1.50
  -5   4 -11    7.05    1.91
   5  -4 -11    6.70    2.96
  -4  -5 -11    7.09    1.82
   4   5 -11    7.80    1.32
   5  -4  12    1.85    2.01
  -5   4  12    2.66    0.85
  -4  -5  12    2.67    1.40
   4   5 -12    2.89    0.86
  -5   4 -12    1.10    2.56
   5  -4 -12    2.07    1.66
   5  -4 -12    2.96    0.85
  -4  -5 -12    3.90    2.45
   4   5 -12    4.77    1.08
   5  -4  13    1.63    1.22
  -4  -5  13    0.67    0.94
   4   5  13    1.31    1.57
  -5   4  13   -0.13    0.58
  -5   4 -13   -0.56    0.99
  -5   4 -13    0.03    0.71
   5  -4 -13   -0.13    1.05
   5  -4 -13    0.07    0.56
  -4  -5 -13   -0.74    1.02
   4   5 -13   -0.08    0.73
   4   5 -13    0.07    0.57
   5  -4  14   -0.04    2.03
  -5   4  14   -0.03    0.64
   4   5  14    0.83    1.03
  -4  -5  14   -0.18    1.63
   5  -4 -14    0.04    1.13
  -5   4 -14    0.00    1.04
  -5   4 -14   -0.04    0.75
   4   5 -14    0.03    0.64
   4   5 -14    1.04    1.24
   5  -4 -14   -0.20    0.63
   4   5  15    1.27    1.41
   5  -4  15    3.26    1.70
  -5   4  15    0.07    1.39
  -4  -5  15    1.22    1.39
   5  -4 -15   -0.04    0.81
  -5   4 -15    0.87    1.79
   4   5 -15   -0.02    0.85
   4   5 -15    2.42    1.61
  -4  -5 -15    1.11    2.14
  -4  -5  16   -0.51    1.37
   4   5  16   -0.50    1.45
  -5   4  16    0.18    0.88
   5  -4 -16   -0.74    1.53
  -5   4 -16    3.41    1.38
  -5   4 -16   -0.04    1.01
   4   5 -16   -0.07    0.87
   4   5 -16    2.22    1.06
   5  -4 -16   -0.20    1.33
  -4  -5 -16    0.39    1.67
   5  -4  17   -0.72    2.32
   4   5  17    6.43    2.97
  -4  -5  17    3.35    2.96
  -5   4  17    0.27    1.11
   5  -4 -17    2.34    1.09
   4   5 -17    0.12    1.68
  -4  -5 -17    7.48    4.11
   4   5 -17    3.12    1.37
  -5   4 -17    3.35    1.77
  -5   4 -17   -0.03    1.26
   5  -4 -17    6.51    1.85
   6  -4   0  658.80   16.92
  -6   4   0  649.14   16.24
   6  -4   0  642.53   16.59
  -6   4   0  641.02   17.71
   4   6   0  652.87   17.19
  -4  -6   0  647.52   17.09
   6  -4   1   59.02    2.66
  -4  -6   1   59.16    1.88
   4   6   1   57.89    2.06
  -6   4   1   56.57    1.32
  -6   4   1   57.54    2.00
  -4  -6  -1   58.29    2.16
  -6   4  -1   56.51    2.47
   6  -4  -1   57.09    1.90
   6  -4  -1   57.99    1.79
  -6   4  -1   58.19    1.64
  -6   4   2   18.70    1.24
  -4  -6   2   18.34    1.54
   6  -4   2   16.67    1.24
   4   6   2   18.72    1.28
   6  -4  -2   17.26    0.68
  -4  -6  -2   18.56    1.30
  -6   4  -2   16.05    1.14
  -6   4  -2   16.77    0.73
   6  -4  -2   18.53    1.20
  -4  -6   3   29.53    1.41
  -6   4   3   27.68    2.55
   4   6   3   29.24    1.65
   6  -4   3   29.39    1.77
  -4  -6  -3   30.36    2.59
   6  -4  -3   29.61    0.58
  -6   4  -3   28.54    1.65
   6  -4  -3   30.18    1.67
  -4  -6   4   11.51    1.13
   4   6   4   10.13    1.31
  -4  -6   4   12.17    1.08
   6  -4   4   13.38    1.53
  -6   4   4   12.73    2.25
   6  -4  -4   11.08    0.24
  -4  -6  -4   12.81    1.38
  -6   4  -4   13.21    1.38
   6  -4  -4   10.93    1.36
  -4  -6   5    3.63    1.31
   4   6   5    3.67    1.04
  -4  -6   5    3.01    0.84
  -6   4   5    4.24    1.81
  -6   4   5    3.24    0.15
   6  -4   5    3.87    1.22
  -4  -6  -5    3.74    1.72
   6  -4  -5    2.78    1.03
  -6   4  -5    4.46    1.06
  -4  -6   6   11.72    0.80
  -4  -6   6   11.34    1.21
   4   6   6   10.35    1.46
   6  -4   6   11.25    2.69
  -6   4   6   13.10    1.73
  -6   4   6   11.60    0.54
   6  -4  -6   14.98    2.44
   6  -4  -6   12.28    0.46
  -4  -6  -6   14.12    2.44
  -6   4  -6   13.43    1.53
   6  -4   7   19.58    2.25
  -4  -6   7   23.89    1.15
  -4  -6   7   22.24    2.48
  -6   4   7   20.81    0.94
   4   6   7   19.23    1.91
   4   6  -7   19.98    0.91
  -4  -6  -7   19.56    2.03
   4   6  -7   21.84    1.41
   6  -4  -7   20.44    0.97
   6  -4  -7   21.43    1.91
  -6   4  -7   20.38    1.99
  -4  -6   8   30.33    3.10
   4   6   8   34.19    3.80
  -4  -6   8   27.64    1.48
   6  -4   8   26.66    2.80
  -6   4   8   26.74    1.42
   4   6  -8   25.95    1.19
   4   6  -8   26.84    2.59
   6  -4  -8   26.33    1.44
  -6   4  -8   26.24    2.68
  -4  -6  -8   29.96    2.61
   6  -4  -8   26.22    2.48
   6  -4   9   48.45    3.62
  -6   4   9   46.84    1.57
   4   6   9   43.51    3.05
  -4  -6   9   49.22    2.79
   4   6  -9   50.31    2.42
   4   6  -9   49.35    2.42
  -6   4  -9   48.82    4.78
  -4  -6  -9   47.58    4.76
   6  -4  -9   46.78    3.23
   6  -4  -9   46.25    1.59
   4   6  10    8.81    1.82
  -6   4  10    7.67    1.25
  -4  -6  10   10.77    1.63
   6  -4  10    7.99    2.23
   4   6 -10    8.67    1.25
  -6   4 -10    9.04    1.89
  -4  -6 -10    7.24    2.79
   4   6 -10    9.36    0.89
   6  -4 -10    8.07    1.83
   6  -4 -10    7.34    1.22
  -4  -6  11    2.46    1.81
   4   6  11    0.80    1.23
   6  -4  11    1.04    2.52
  -6   4  11    1.19    0.91
   4   6 -11    1.47    0.61
   4   6 -11    1.53    0.88
  -6   4 -11    0.15    1.30
   6  -4 -11    0.80    0.56
   6  -4 -11    0.32    1.31
  -4  -6 -11    0.69    1.25
  -4  -6  12   11.47    3.12
   4   6  12   12.68    2.01
  -6   4  12   11.68    1.62
   6  -4  12   11.81    2.68
   4   6 -12   11.74    1.14
   4   6 -12   10.31    1.54
   6  -4 -12   12.36    3.42
  -6   4 -12    8.14    2.14
  -4  -6 -12   13.22    2.14
   6  -4 -12   10.89    1.06
  -6   4  13    5.60    1.42
  -4  -6  13    6.14    1.77
   6  -4  13    4.47    2.23
   4   6  13    5.18    1.70
   4   6 -13    6.34    1.32
   4   6 -13   -0.01    1.49
  -4  -6 -13    6.79    2.83
  -6   4 -13    6.68    2.87
   6  -4 -13    5.02    2.89
   6  -4  14   -0.54    1.61
   4   6  14    1.44    1.96
  -4  -6  14    1.05    1.29
  -6   4  14    0.26    1.03
   4   6 -14    1.19    0.95
  -4  -6 -14    0.58    1.22
   6  -4 -14    2.59    1.35
   6  -4 -14   -0.02    0.66
   4   6 -14    0.08    0.68
  -6   4 -14    0.82    1.29
  -6   4 -14   -0.01    0.89
  -4  -6  15    0.16    1.18
  -6   4  15    0.08    0.66
   4   6  15   -0.58    1.86
   6  -4  15    1.87    1.47
   4   6 -15   -0.12    0.87
   4   6 -15   -0.03    0.64
  -6   4 -15    0.04    0.84
   6  -4 -15    0.00    0.62
   6  -4 -15    1.99    1.26
  -4  -6 -15   -1.68    1.20
  -6   4 -15    0.74    0.99
  -4  -6  16    4.61    3.02
   4   6  16    3.98    1.88
  -6   4  16    0.21    1.06
   6  -4 -16    6.98    1.91
   4   6 -16    0.01    1.02
   4   6 -16    5.35    1.46
  -4  -6 -16    8.67    3.47
   6  -4 -16    3.44    0.99
  -6   4 -16    3.55    2.36
  -6   4 -16    0.01    1.30
   6  -4  17   -2.06    1.72
  -4  -6  17   -0.03    1.39
   4   6  17   -0.93    1.31
  -4  -6 -17    4.58    1.89
  -6   4 -17    0.52    1.39
   4   6 -17   -0.75    1.61
  -6   4 -17   -0.03    1.43
   6  -4 -17   -1.44    2.07
  -4  -7   0   -0.72    0.51
  -7   4   0    0.08    0.33
   7  -4   0    0.23    0.58
  -7   4   0   -0.03    0.44
   7  -4   0   -0.20    0.42
   4   7   0    0.10    0.48
  -4  -7   1   51.17    1.84
  -7   4   1   54.04    1.94
  -7   4   1   54.50    1.64
   4   7   1   56.79    2.06
   7  -4   1   52.92    2.60
   7  -4  -1   54.15    1.78
  -4  -7  -1   55.40    2.10
  -7   4  -1   52.15    1.80
  -7   4  -1   53.27    1.63
   7  -4  -1   52.15    1.89
   7  -4   2    6.24    0.95
  -7   4   2    6.78    0.96
   4   7   2    7.34    0.97
  -4  -7   2    7.66    0.80
  -7   4   2    6.50    0.40
  -7   4  -2    6.92    0.59
  -7   4  -2    6.20    0.86
   7  -4  -2    6.90    0.88
  -4  -7  -2    6.22    0.98
   7  -4  -2    6.07    0.33
  -4  -7   3    9.37    0.98
   4   7   3    7.93    1.07
   7  -4   3    8.14    1.18
  -7   4   3    9.27    1.19
   7  -4  -3    7.47    1.09
   7  -4  -3    7.54    0.21
  -4  -7  -3    9.12    1.18
  -7   4  -3    8.93    1.05
   7  -4   4   40.43    2.41
  -4  -7   4   44.19    1.69
  -4  -7   4   42.06    2.86
  -7   4   4   41.70    2.33
   4   7   4   43.39    2.14
  -7   4  -4   41.13    2.20
  -4  -7  -4   43.00    2.20
   7  -4  -4   42.93    2.25
  -4  -7   5    2.96    0.86
   4   7   5    3.04    1.00
  -7   4   5    2.21    1.10
  -4  -7   5    4.28    0.75
   7  -4   5    2.63    1.16
  -7   4  -5    3.05    1.05
   7  -4  -5    2.46    1.00
  -4  -7  -5    2.73    1.06
  -7   4   6    2.92    0.16
   7  -4   6    3.94    1.31
  -7   4   6    3.25    1.99
   4   7   6    3.79    1.08
  -4  -7   6    3.60    0.52
  -4  -7   6    4.06    1.47
   7  -4  -6    2.69    1.13
  -4  -7  -6    3.75    1.16
  -7   4  -6    2.58    1.17
   4   7   7   15.74    1.78
  -7   4   7   13.48    0.59
  -7   4   7   14.20    2.02
   7  -4   7   13.26    2.24
  -4  -7   7   15.24    1.56
  -4  -7   7   14.85    1.39
  -7   4  -7   15.45    1.86
   7  -4  -7   15.69    1.82
  -4  -7  -7   15.06    1.93
   7  -4  -7   14.12    0.59
  -4  -7   8  125.30    3.75
   4   7   8  124.54    6.89
  -7   4   8  118.29    3.02
  -4  -7   8  124.96    4.98
   7  -4   8  108.45    5.94
   7  -4  -8  112.79    2.94
   4   7  -8  121.45    4.43
  -7   4  -8  106.52    5.31
   7  -4  -8  112.16    5.17
  -4  -7  -8  129.74    5.68
   4   7   9    8.98    1.77
  -4  -7   9   10.56    1.59
  -7   4   9    8.96    0.61
   7  -4   9    9.76    2.22
   4   7  -9    9.82    1.33
  -4  -7  -9    8.70    1.87
   7  -4  -9   12.78    1.85
  -7   4  -9    8.92    1.99
   4   7  -9    8.47    0.75
   7  -4  -9    9.25    0.90
   4   7  10   -1.37    1.04
  -7   4  10   -0.34    0.58
  -4  -7  10    0.80    0.96
   7  -4  10    0.05    2.12
   7  -4 -10   -0.25    0.35
  -7   4 -10    0.21    1.73
   4   7 -10    0.73    1.23
   7  -4 -10   -0.20    1.06
   4   7 -10   -0.41    0.43
  -4  -7 -10   -1.12    1.05
  -7   4  11   11.11    0.86
   4   7  11   11.40    1.98
   7  -4  11   10.35    2.65
  -4  -7  11   12.35    1.95
  -7   4 -11    8.91    2.25
   7  -4 -11   11.12    0.87
   4   7 -11   11.21    1.57
  -4  -7 -11   10.92    3.24
   7  -4 -11   13.00    2.13
   4   7 -11   12.29    0.98
  -4  -7  12    5.34    1.71
   4   7  12    4.82    1.67
  -7   4  12    5.36    0.75
   7  -4  12    7.18    2.38
  -7   4 -12    4.65    1.89
   4   7 -12    4.91    1.34
   4   7 -12    6.24    0.85
  -4  -7 -12    4.01    2.91
   7  -4 -12    4.37    1.20
   7  -4 -12    4.88    1.84
  -4  -7  13    4.23    1.63
  -7   4  13    2.34    0.73
   4   7  13    3.08    1.52
   7  -4  13    3.07    3.23
   4   7 -13    4.34    1.22
  -4  -7 -13    4.32    1.68
   7  -4 -13    4.63    1.69
  -7   4 -13    4.62    1.78
   4   7 -13    0.01    1.18
   7  -4 -13    2.25    0.72
  -7   4  14    0.13    0.56
   4   7  14    0.99    1.09
   7  -4  14    1.13    1.47
  -4  -7  14   -0.42    1.99
  -4  -7 -14    1.19    1.14
   4   7 -14    0.47    0.92
   4   7 -14    0.01    0.55
  -7   4 -14    0.03    0.86
  -7   4 -14    0.86    1.27
   7  -4 -14   -1.23    1.26
   7  -4 -14   -0.02    0.54
  -4  -7  15    0.53    1.32
   4   7  15    0.26    1.26
   7  -4  15    3.17    1.61
  -7   4  15    0.15    0.97
   4   7 -15    1.61    1.56
  -4  -7 -15    1.83    2.19
  -7   4 -15   -0.18    1.13
   4   7 -15   -0.01    0.60
  -7   4 -15   -0.04    0.92
   7  -4 -15   -2.09    2.09
   7  -4 -15    0.14    0.58
   7  -4  16   -1.60    2.15
   4   7  16    4.74    1.77
  -4  -7  16    2.89    1.91
  -7   4 -16   -0.12    1.26
  -7   4 -16    3.01    1.51
  -4  -7 -16    7.40    2.11
   4   7 -16   -0.03    0.82
   7  -4 -16    4.38    1.80
   4   7 -16    1.91    2.12
  -4  -8   0  176.83    4.90
  -8   4   0  187.93    5.95
   8  -4   0  185.78    4.71
  -8   4   0  174.92    4.37
   4   8   0  185.85    5.06
  -8   4   1    5.14    0.86
  -4  -8   1    6.32    0.82
  -8   4   1    5.27    0.66
   8  -4   1    5.72    0.78
   4   8   1    4.83    0.89
  -4  -8  -1    4.56    0.88
   8  -4  -1    4.75    0.47
  -8   4  -1    4.68    0.72
   8  -4  -1    5.84    0.82
  -8   4  -1    5.04    0.69
   4   8   2   46.01    2.00
  -4  -8   2   43.41    1.80
  -8   4   2   45.92    1.13
   8  -4   2   43.01    1.97
  -8   4   2   45.38    2.08
   8  -4  -2   44.16    1.27
  -4  -8  -2   45.37    2.06
  -8   4  -2   41.60    1.86
   8  -4  -2   42.93    1.90
  -8   4  -2   44.37    1.48
   8  -4   3    0.12    0.79
  -4  -8   3    0.76    0.66
  -8   4   3    0.66    0.77
   4   8   3    0.09    0.72
  -4  -8  -3    1.24    0.77
  -8   4  -3    1.54    1.08
   8  -4  -3    1.18    0.74
   8  -4  -3    0.80    0.11
  -4  -8   4   -0.62    0.26
  -4  -8   4    0.23    0.57
   8  -4   4   -0.67    0.71
  -8   4   4    0.77    0.65
   4   8   4    0.23    0.62
   8  -4  -4    0.91    0.64
  -4  -8  -4    0.41    0.67
  -8   4  -4    0.54    1.01
   8  -4   5    0.81    0.98
  -4  -8   5    0.88    0.35
  -4  -8   5    0.11    0.76
   4   8   5    0.91    0.79
  -8   4   5    1.31    0.90
  -8   4  -5   -0.97    1.43
   8  -4  -5    0.55    1.34
  -4  -8  -5   -0.14    0.86
  -4  -8   6    1.76    0.69
  -4  -8   6    1.31    0.88
   4   8   6    1.04    0.99
   8  -4   6   -0.55    1.97
  -8   4   6    0.60    1.14
  -4  -8  -6    1.92    1.06
   8  -4  -6    0.83    1.05
  -4  -8   7    6.57    0.71
  -4  -8   7    7.47    2.15
  -8   4   7    6.15    1.75
   4   8   7    7.34    1.49
   8  -4   7    6.62    1.95
  -8   4  -7    5.60    1.62
   8  -4  -7    7.64    1.60
  -4  -8  -7    5.83    1.67
  -4  -8   8    1.54    0.53
  -4  -8   8    1.85    1.61
   8  -4   8    1.76    1.38
   4   8   8   -0.07    1.15
  -8   4   8   -0.25    1.25
  -8   4   8    1.01    0.25
   4   8  -8    0.67    0.97
  -8   4  -8    1.43    1.15
   8  -4  -8    1.18    1.13
  -4  -8  -8    1.86    1.17
   8  -4  -8    0.65    0.14
  -4  -8   9   21.31    3.44
   4   8   9   25.14    2.37
   8  -4   9   23.36    4.76
  -8   4   9   21.45    0.95
   8  -4  -9   20.98    0.66
  -8   4  -9   23.27    2.65
  -4  -8  -9   20.63    2.48
   8  -4  -9   22.14    3.75
   4   8  -9   21.75    1.88
  -8   4  10    8.98    0.83
   4   8  10    8.71    1.84
   8  -4  10   10.52    2.32
  -4  -8  10    8.32    2.81
  -4  -8 -10    8.81    1.90
  -8   4 -10    8.80    2.00
   8  -4 -10    8.19    3.00
   4   8 -10   10.25    1.44
   8  -4 -10    7.94    0.54
   8  -4  11    7.12    2.28
  -4  -8  11    8.39    2.60
  -8   4  11    4.99    0.58
   4   8  11    5.15    1.64
   4   8 -11    5.44    0.71
  -4  -8 -11    3.37    1.81
  -8   4 -11    5.62    1.95
   8  -4 -11    6.30    0.56
   8  -4 -11    4.25    2.81
   4   8 -11    6.46    1.36
   8  -4  12    1.86    3.23
  -8   4  12    1.47    0.54
  -4  -8  12    3.26    1.45
   4   8  12    2.76    1.42
  -4  -8 -12    3.93    1.60
   4   8 -12    2.61    1.14
   8  -4 -12    2.18    0.51
   8  -4 -12    2.86    2.44
  -8   4 -12    2.80    1.67
   4   8 -12    2.47    0.62
  -4  -8  13    0.39    1.39
   8  -4  13   -0.77    1.74
   4   8  13   -0.06    1.25
  -8   4  13    1.25    0.48
   4   8 -13    0.78    0.57
   8  -4 -13    0.74    0.48
  -8   4 -13   -1.81    1.53
  -4  -8 -13    0.80    1.36
   4   8 -13    0.33    1.00
   8  -4 -13    0.82    1.35
   4   8  14    9.24    2.08
  -4  -8  14   11.39    2.46
   8  -4  14    9.80    2.89
  -8   4  14    9.25    0.96
   4   8 -14   10.69    1.80
  -4  -8 -14    6.72    3.49
  -8   4 -14    3.32    3.40
   8  -4 -14    9.17    1.39
   8  -4 -14    9.93    2.35
   4   8 -14    7.66    1.02
  -4  -8  15    1.59    1.55
   4   8  15    1.80    1.38
   8  -4  15    0.58    2.91
  -8   4 -15    0.02    1.05
  -4  -8 -15    2.74    1.59
   8  -4 -15    0.51    1.51
   4   8 -15    1.21    1.12
   4   8 -15   -0.05    0.59
  -8   4 -15    0.87    1.30
   4   8  16    1.06    1.51
  -4  -8  16    1.84    2.74
   8  -4  16    1.25    1.92
  -4  -8 -16    4.19    1.88
   4   8 -16   -0.41    1.21
  -8   4 -16    0.28    1.40
  -8   4 -16    0.03    1.79
   8  -4 -16   -0.02    1.65
  -9   4   0    0.48    0.55
  -4  -9   0   -0.06    0.96
   9  -4   0    0.32    0.43
   4   9   0    0.49    0.57
  -9   4   0   -0.32    0.62
  -9   4   1    8.03    0.56
   9  -4   1    8.03    0.97
  -9   4   1    8.32    1.72
  -4  -9   1    7.86    1.00
   4   9   1    9.01    1.08
  -9   4  -1    8.25    0.86
   9  -4  -1    7.75    0.62
  -9   4  -1    7.89    0.89
  -4  -9  -1    8.59    1.12
   9  -4  -1    8.40    1.01
  -9   4   2   34.61    1.07
  -9   4   2   35.15    1.93
   9  -4   2   35.74    2.65
  -4  -9   2   31.50    1.66
   4   9   2   34.58    1.85
  -9   4  -2   32.09    1.40
   9  -4  -2   34.04    1.20
   9  -4  -2   30.50    2.57
  -4  -9  -2   34.42    2.79
  -9   4  -2   30.85    2.42
   9  -4   3    1.11    1.53
   4   9   3    1.61    1.40
  -4  -9   3    2.46    0.86
  -9   4   3    2.80    0.96
  -4  -9   3    3.31    0.79
  -9   4  -3    2.05    0.85
   9  -4  -3    2.49    0.18
   9  -4  -3    2.21    0.90
  -4  -9  -3    3.18    0.96
   9  -4   4   14.02    1.61
  -4  -9   4   12.48    1.31
  -9   4   4   11.93    1.53
  -4  -9   4   12.92    0.61
   4   9   4   12.15    1.33
  -9   4  -4   13.87    1.40
  -4  -9  -4   13.62    1.40
   9  -4  -4   11.51    1.43
  -9   4   5   18.80    1.94
  -4  -9   5   23.93    2.64
   4   9   5   20.66    1.76
  -4  -9   5   21.81    0.83
   9  -4   5   22.82    2.11
  -9   4  -5   20.79    1.87
  -4  -9  -5   21.74    2.78
   9  -4  -5   20.99    1.85
   9  -4   6  227.85    8.86
   4   9   6  234.49    7.90
  -9   4   6  229.05   10.45
  -4  -9   6  232.97    7.90
  -4  -9   6  237.22    5.69
  -4  -9  -6  222.66    8.00
   9  -4  -6  229.94    8.17
   9  -4   7   43.34    3.54
  -9   4   7   46.57    3.31
   4   9   7   41.96    4.01
  -4  -9   7   41.47    2.77
  -4  -9   7   46.75    2.07
   9  -4  -7   43.06    4.50
  -4  -9  -7   48.19    3.17
  -9   4  -7   37.70    4.56
  -4  -9   8   -0.68    0.97
   4   9   8    0.55    0.98
  -4  -9   8    0.64    0.44
  -9   4   8    0.09    1.25
  -9   4  -8    0.32    1.16
   9  -4  -8    1.67    1.11
  -4  -9  -8    0.25    1.12
   9  -4   9    4.39    1.96
  -9   4   9    3.69    0.21
   4   9   9    4.90    1.46
  -4  -9   9    4.75    1.47
  -9   4  -9    4.76    1.64
   9  -4  -9    4.92    1.60
  -4  -9  -9    4.30    1.62
   4   9  10   14.68    3.12
   9  -4  10   11.76    2.83
  -4  -9  10   12.76    2.12
  -9   4  10   12.52    0.64
   9  -4 -10   12.18    0.41
   9  -4 -10   14.66    2.20
  -4  -9 -10   13.70    2.18
  -9   4 -10   13.68    2.43
   4   9 -10   13.99    1.69
   4   9  11    0.39    1.69
  -4  -9  11    1.72    1.13
   9  -4  11    0.26    2.44
   4   9 -11    0.83    0.90
   9  -4 -11    0.23    0.37
   9  -4 -11    0.18    1.20
  -4  -9 -11   -0.78    1.97
   4   9  12    0.81    1.31
  -9   4  12    1.28    0.36
   9  -4  12    0.90    1.80
  -4  -9  12    3.13    1.37
   4   9 -12    0.91    1.09
   9  -4 -12    0.99    0.33
  -4  -9 -12    2.06    2.34
  -9   4 -12    0.41    1.50
   9  -4 -12    0.84    1.43
  -4  -9  13    2.16    1.50
  -9   4  13    0.77    0.38
   4   9  13    0.98    1.30
   9  -4  13    0.40    1.79
   9  -4 -13   -0.03    1.48
   9  -4 -13    1.14    0.37
  -4  -9 -13    1.03    1.39
   4   9 -13   -0.50    1.09
   9  -4  14    1.66    3.63
   4   9  14    2.58    1.72
  -4  -9  14    1.86    2.96
  -4  -9 -14    1.44    1.82
   9  -4 -14   -0.40    2.89
   4   9 -14    3.21    1.38
  -9   4 -14    3.80    1.76
  -4  -9  15    2.70    1.89
   4   9  15    4.37    2.63
  -9   4 -15   -0.39    1.77
  -4  -9 -15    0.74    1.86
   4   9 -15    2.13    1.37
   9  -4 -15    3.52    2.81
   9  -4  16    2.43    2.27
  -4  -9  16    1.22    2.08
   4   9  16    8.84    2.64
  -9   4 -16    0.02    1.33
   4   9 -16    1.06    1.40
  -4  -9 -16    4.04    3.32
  -9   4 -16    1.68    1.69
   9  -4 -16    1.26    1.84
  10  -4   0   31.18    1.42
 -10   4   0   29.98    1.30
  -4 -10   0   29.79    2.63
 -10   4   0   31.45    1.71
 -10   4   1    0.40    0.34
  10  -4   1   -0.38    0.96
   4  10   1    0.90    1.08
 -10   4   1    0.48    0.69
  -4 -10   1    0.69    0.66
  10  -4  -1    0.37    0.68
  -4 -10  -1    2.30    0.71
 -10   4  -1    0.47    0.83
  10  -4  -1    0.47    0.39
 -10   4  -1    0.09    0.58
 -10   4   2  125.39    4.29
   4  10   2  129.05    4.19
  -4 -10   2  129.12    4.09
  10  -4   2  128.89    4.33
 -10   4   2  134.13    3.14
 -10   4  -2  122.37    3.97
  -4 -10  -2  124.26    4.20
  10  -4  -2  130.76    4.31
  10  -4  -2  124.55    3.13
 -10   4  -2  125.32    3.64
  -4 -10   3    2.62    0.90
 -10   4   3    4.29    0.97
  10  -4   3    2.47    0.97
  -4 -10   3    2.25    0.83
 -10   4   3    2.37    0.13
   4  10   3    2.32    0.91
  -4 -10  -3    3.40    1.49
 -10   4  -3    1.50    0.62
 -10   4  -3    3.16    0.86
  10  -4  -3    2.60    0.94
  10  -4  -3    2.55    0.24
   4  10   4    2.34    0.99
  -4 -10   4    3.36    0.98
  10  -4   4    2.31    1.13
 -10   4   4    4.01    1.14
  10  -4  -4    1.85    1.04
 -10   4  -4    2.18    1.01
  -4 -10  -4    2.23    1.03
  -4 -10   5    1.69    0.60
  -4 -10   5    1.45    1.57
   4  10   5    1.10    1.64
 -10   4   5    1.69    1.15
  10  -4   5    1.65    1.19
 -10   4  -5    1.87    1.05
  10  -4  -5    1.28    1.03
  -4 -10  -5    2.06    1.06
 -10   4   6    7.48    1.74
   4  10   6    6.55    1.48
  -4 -10   6    6.68    0.90
  -4 -10   6    8.32    2.37
 -10   4  -6    7.77    1.62
  -4 -10  -6    5.07    1.62
  10  -4  -6    5.89    2.47
   4  10   7   12.70    1.87
  -4 -10   7   12.44    1.87
  -4 -10   7   14.23    1.18
 -10   4   7   15.67    2.25
 -10   4  -7   11.85    3.44
  -4 -10  -7   14.54    2.10
  10  -4  -7   14.87    2.08
   4  10   8   11.92    1.84
  10  -4   8   10.77    2.48
  -4 -10   8   11.56    0.81
  -4 -10   8   12.53    1.90
 -10   4   8   15.25    2.33
  10  -4  -8   12.29    2.09
  -4 -10  -8   11.14    2.08
 -10   4  -8   10.48    2.10
   4  10   9    2.01    1.53
  10  -4   9   -0.68    1.34
 -10   4   9   -2.66    1.23
  -4 -10   9    0.42    1.03
 -10   4  -9    0.28    1.12
  -4 -10  -9    1.43    1.07
  10  -4  -9    0.69    1.10
   4  10  10    9.26    1.92
  10  -4  10    8.74    4.16
  -4 -10  10   10.87    2.03
  10  -4 -10    9.56    2.04
 -10   4 -10   10.70    2.32
  -4 -10 -10    9.63    2.18
  -4 -10  11    0.82    1.30
   4  10  11    0.78    1.16
  10  -4 -11    1.09    1.36
  -4 -10 -11    0.93    1.39
  -4 -10  12   -0.40    1.58
   4  10  12    0.30    0.86
 -10   4  12    0.05    0.21
   4  10 -12   -0.28    0.91
 -10   4 -12   -0.92    1.02
  -4 -10 -12    0.56    1.02
  10  -4 -12   -0.13    1.01
  10  -4  13    3.47    2.07
   4  10  13    3.17    1.41
  -4 -10  13    1.32    1.60
  -4 -10 -13    1.70    1.63
 -10   4 -13    0.88    1.74
   4  10 -13   -0.75    1.48
  10  -4 -13    4.41    1.64
   4  10  14    3.62    1.68
  -4 -10  14    2.78    1.96
  -4 -10 -14    5.25    2.95
  10  -4 -14    0.15    1.90
   4  10 -14    3.05    1.69
   4  10  15    2.57    1.28
  -4 -10  15    0.76    1.54
  -4 -10 -15   -1.58    1.54
  10  -4 -15    0.27    1.46
   4  10 -15   -1.16    1.26
   4  10  16    0.12    1.22
  10  -4  16    0.17    1.71
  -4 -10  16    2.42    2.21
 -10   4 -16    0.42    1.57
 -10   4 -16   -0.11    0.93
  10  -4 -16   -1.37    1.27
  -4 -10 -16    0.10    1.48
 -11   4   0    0.43    0.58
  11  -4   0   -0.38    0.44
 -11   4   0    0.24    0.39
  -4 -11   0    0.31    0.97
 -11   4   1   60.71    1.76
   4  11   1   58.71    2.61
  11  -4   1   59.15    3.27
  -4 -11   1   60.31    2.52
 -11   4   1   61.29    2.71
 -11   4  -1   64.45    2.44
 -11   4  -1   60.54    3.04
  11  -4  -1   60.72    1.87
  -4 -11  -1   63.03    2.75
 -11   4   2    0.88    0.47
 -11   4   2    0.23    0.85
   4  11   2    1.10    0.83
  -4 -11   2    2.08    0.78
  11  -4   2    1.10    0.80
  11  -4  -2    0.94    0.32
 -11   4  -2    0.47    0.65
 -11   4  -2    0.90    0.70
  11  -4  -2    0.94    0.84
  -4 -11  -2    0.54    0.87
  11  -4   3   54.77    2.84
 -11   4   3   55.06    2.87
   4  11   3   57.07    2.71
  -4 -11   3   57.11    2.67
  -4 -11   3   54.93    2.48
 -11   4   3   56.54    1.16
 -11   4  -3   55.80    2.15
  11  -4  -3   54.81    1.01
  11  -4  -3   55.84    2.75
 -11   4  -3   53.84    2.54
  -4 -11  -3   53.26    2.70
   4  11   4    2.37    1.08
  11  -4   4    2.08    1.21
  -4 -11   4    2.95    1.10
 -11   4   4    3.89    1.19
  -4 -11  -4    3.17    1.13
  11  -4  -4    2.11    1.15
 -11   4  -4    3.55    1.08
  11  -4   5  154.03    6.53
  -4 -11   5  156.06    5.77
   4  11   5  156.39    5.72
  -4 -11   5  161.45    4.25
 -11   4   5  151.94    6.19
  11  -4  -5  149.59    5.87
  -4 -11  -5  154.72    7.65
 -11   4  -5  144.68    5.89
  -4 -11   6   13.90    2.74
 -11   4   6    9.78    1.99
  11  -4   6   11.94    2.17
  -4 -11   6   11.78    0.67
   4  11   6   10.34    1.66
  11  -4  -6   11.50    1.83
 -11   4  -6    9.99    1.83
  -4 -11  -6   11.87    1.87
 -11   4   7  182.71   10.15
   4  11   7  181.26    6.96
  11  -4   7  169.75    8.24
  -4 -11   7  185.23    9.39
  -4 -11   7  184.56    4.47
  11  -4  -7  173.25    7.31
  -4 -11  -7  183.36    7.46
 -11   4   8    2.55    1.67
  -4 -11   8    3.35    2.18
  -4 -11   8    2.15    0.74
   4  11   8    2.49    1.33
  11  -4   8    0.77    1.81
  11  -4  -8    1.99    1.43
  -4 -11  -8    2.58    1.47
 -11   4  -8    1.65    2.41
 -11   4   9    1.30    1.63
   4  11   9    1.97    1.24
  -4 -11   9    0.72    2.20
  11  -4  -9    1.74    2.24
 -11   4  -9    1.05    1.46
  -4 -11  -9    1.58    1.41
   4  11  10    9.87    1.75
  -4 -11  10    9.92    3.08
  -4 -11 -10    9.00    2.20
 -11   4 -10    8.44    2.12
  11  -4 -10    9.77    2.14
  11  -4  11    0.60    1.85
   4  11  11    1.38    1.21
  -4 -11  11    0.07    1.40
  11  -4 -11    4.32    1.53
  -4 -11 -11    0.66    1.51
  11  -4  12    2.31    1.79
   4  11  12   -0.13    1.23
  -4 -11  12    1.22    1.48
  11  -4 -12    1.88    1.55
  -4 -11 -12    1.34    2.42
   4  11  13    2.02    1.27
  -4 -11  13    1.19    1.54
 -11   4 -13    0.29    1.46
  11  -4 -13   -0.29    1.63
  -4 -11 -13    1.17    2.40
   4  11  14    0.64    1.57
  -4 -11  14   -0.95    1.22
  11  -4 -14   -0.21    1.96
  -4 -11 -14    0.57    1.18
   4  11  15    8.29    2.18
  -4 -11  15    7.76    4.32
  11  -4  15    4.23    3.08
  -4 -11 -15   10.14    2.68
  11  -4 -15    6.99    4.10
  -4 -12   0    6.39    1.87
  12  -4   0    5.92    0.86
 -12   4   0    7.14    1.13
 -12   4   0    5.54    0.78
  -4 -12   1   24.74    2.70
  12  -4   1   23.51    1.61
 -12   4   1   22.31    1.51
 -12   4   1   24.55    1.82
  -4 -12  -1   23.33    1.85
 -12   4  -1   22.47    1.41
 -12   4  -1   24.83    1.63
  12  -4  -1   22.75    1.14
  -4 -12   2  143.66    6.26
 -12   4   2  148.29    3.48
   4  12   2  136.24    6.15
  12  -4   2  135.86    5.03
 -12   4   2  148.12    5.32
  12  -4  -2  138.70    3.38
 -12   4  -2  144.11    4.63
  -4 -12  -2  144.27    5.17
 -12   4  -2  138.85    4.79
  -4 -12   3   76.95    3.50
  -4 -12   3   81.53    4.73
   4  12   3   81.20    4.77
 -12   4   3   83.19    3.83
 -12   4   3   85.03    1.63
  -4 -12  -3   80.39    3.63
 -12   4  -3   78.82    3.48
  12  -4  -3   82.19    5.09
  12  -4  -3   82.81    1.86
 -12   4  -3   81.69    2.98
  12  -4   4   -0.24    1.44
   4  12   4    0.38    0.75
  -4 -12   4    0.00    0.80
  -4 -12   4    0.12    0.75
 -12   4   4    0.04    0.89
  12  -4  -4    0.51    0.83
  -4 -12  -4   -0.63    0.82
 -12   4  -4    0.61    0.76
  -4 -12   5   11.34    1.74
  -4 -12   5   10.72    0.62
   4  12   5   10.65    1.63
 -12   4   5   10.33    3.02
  12  -4   5    7.51    3.21
  12  -4  -5   11.46    1.82
  -4 -12  -5   10.05    1.72
 -12   4  -5    9.51    1.74
  -4 -12   6    3.04    0.65
  -4 -12   6    1.60    1.33
  12  -4   6    1.18    2.53
   4  12   6    2.22    1.26
 -12   4   6    2.38    1.42
  -4 -12  -6    0.65    1.35
  12  -4  -6    1.21    1.27
 -12   4  -6    1.96    1.31
  -4 -12   7    3.35    1.43
  -4 -12   7    2.34    0.68
   4  12   7    3.03    1.33
 -12   4   7    1.91    1.64
  12  -4  -7    2.74    2.32
  -4 -12  -7    2.75    2.37
  -4 -12   8   20.38    0.84
  -4 -12   8   20.91    2.44
   4  12   8   20.76    2.32
 -12   4   8   22.34    2.91
  12  -4  -8   16.51    2.52
  -4 -12  -8   19.52    3.90
   4  12   9    2.10    1.21
  -4 -12   9    2.02    1.38
 -12   4   9    1.67    1.66
  12  -4  -9    0.21    1.40
  -4 -12  -9    2.11    2.27
  -4 -12  10    1.72    1.34
   4  12  10    0.91    1.14
 -12   4  10   -0.19    1.39
  12  -4 -10    1.38    1.35
 -12   4 -10    0.36    1.36
  -4 -12 -10    3.32    2.28
  -4 -12  11    2.50    1.42
   4  12  11    0.58    1.87
  12  -4 -11    0.57    1.41
  -4 -12 -11   -0.35    1.51
   4  12  12    1.90    1.44
  -4 -12  12    3.20    1.79
  -4 -12 -12    4.23    1.78
  12  -4 -12    1.69    1.79
  -4 -12  13    2.78    2.07
   4  12  13    4.35    1.68
 -12   4 -13    3.26    2.00
  -4 -12 -13    6.01    1.93
  12  -4 -13   -0.31    2.01
   4  12  14    2.91    1.50
  -4 -12  14   -1.50    3.01
  12  -4  14   -1.14    2.11
  -4 -12 -14    3.67    1.80
  12  -4 -14   -0.35    1.84
   4  12  15    1.90    1.69
  -4 -12  15    0.10    2.08
  -4 -12 -15   -1.87    3.16
  12  -4 -15    3.86    1.92
 -13   4   0   -0.28    0.76
  13  -4   0   -0.17    0.89
 -13   4   0   -0.17    0.81
  -4 -13   0   -1.08    1.31
 -13   4   1    1.58    0.52
  -4 -13   1    0.72    1.54
  13  -4   1    1.32    0.79
 -13   4   1    2.27    1.00
 -13   4  -1    0.44    0.89
  -4 -13  -1    0.71    1.62
 -13   4  -1    1.55    0.73
  13  -4  -1    1.28    0.55
  -4 -13   2  126.34    6.17
 -13   4   2  128.36    3.76
 -13   4   2  121.42    4.97
   4  13   2  121.83    4.65
  13  -4   2  131.99    6.52
  13  -4  -2  121.95    3.70
 -13   4  -2  128.96    4.41
 -13   4  -2  116.51    4.47
  -4 -13  -2  120.43    4.72
   4  13   3    0.98    1.01
  13  -4   3    0.72    1.08
  -4 -13   3    1.21    1.03
  -4 -13   3    1.02    1.01
 -13   4   3    2.25    1.13
 -13   4   3    1.34    0.24
  13  -4  -3    1.28    0.25
 -13   4  -3    1.02    0.95
  13  -4  -3    2.07    1.10
 -13   4  -3    2.25    0.81
  -4 -13  -3    1.90    1.05
  -4 -13   4   22.58    2.16
   4  13   4   21.21    2.03
  -4 -13   4   25.44    2.00
  13  -4   4   21.67    2.31
  13  -4  -4   24.83    3.43
 -13   4  -4   23.77    2.03
  -4 -13  -4   20.81    2.10
   4  13   5    3.95    1.30
 -13   4   5    3.72    1.47
  -4 -13   5    4.43    1.43
  -4 -13   5    3.58    0.70
  13  -4   5    5.31    1.62
 -13   4  -5    2.78    1.36
  13  -4  -5    4.18    1.49
  -4 -13  -5    3.84    1.41
  -4 -13   6  167.61    7.06
  -4 -13   6  165.55    3.95
 -13   4   6  153.75    7.15
   4  13   6  166.36    6.56
  13  -4   6  158.65    7.68
 -13   4  -6  148.61    6.84
  -4 -13  -6  155.01    6.69
  13  -4  -6  169.87    9.33
   4  13   7   15.50    3.32
  -4 -13   7   18.10    2.35
 -13   4   7   18.03    2.62
  13  -4   7   19.77    2.74
  -4 -13   7   16.85    1.05
  -4 -13  -7   18.07    2.40
  13  -4  -7   14.34    2.36
 -13   4  -7   15.52    2.44
  -4 -13   8    7.68    1.99
   4  13   8    9.89    1.81
  -4 -13   8    9.24    0.52
 -13   4   8    9.53    3.67
  -4 -13  -8    9.09    2.03
  13  -4  -8    8.26    2.01
  -4 -13   9    1.50    1.46
 -13   4   9    1.35    1.55
   4  13   9    2.29    1.24
  -4 -13  -9    2.40    1.48
 -13   4  -9    2.41    1.43
  13  -4  -9    0.32    2.28
  -4 -13  10    6.21    1.93
   4  13  10    6.96    1.60
 -13   4  10    4.63    1.97
  13  -4  10    4.74    3.90
  13  -4 -10    6.08    3.04
 -13   4 -10   -0.03    1.92
  -4 -13 -10    6.84    1.98
  -4 -13  11    1.78    1.50
   4  13  11    1.30    1.23
  -4 -13 -11    0.08    1.59
  13  -4 -11    0.31    1.38
   4  13  12    4.45    1.46
  -4 -13  12    4.66    2.99
  -4 -13 -12    0.38    1.86
  13  -4 -12    0.54    1.87
   4  13  13    2.52    1.43
  -4 -13  13    1.16    2.88
  -4 -13 -13    0.67    1.68
  13  -4 -13   -0.17    1.71
  -4 -13  14    2.78    2.34
   4  13  14    6.18    1.83
  -4 -13 -14    3.81    3.43
  13  -4 -14   -0.23    2.23
   4  13  15   -0.07    1.64
  -4 -13  15    0.55    2.18
  13  -4 -15    3.54    3.17
  -4 -13 -15    5.02    2.01
  -4 -14   0   10.54    2.54
 -14   4   0   12.78    1.61
 -14   4   0   12.24    1.60
  14  -4   0   12.01    1.80
  -4 -14   1   11.08    1.65
 -14   4   1   15.72    1.74
  14  -4   1   12.89    2.13
 -14   4   1   13.12    0.99
  -4 -14  -1   13.32    2.72
 -14   4  -1   13.53    1.27
  14  -4  -1   10.85    1.49
 -14   4  -1   13.97    1.58
  -4 -14   2   47.26    2.79
  14  -4   2   45.40    2.70
 -14   4   2   48.18    2.11
 -14   4   2   48.37    3.01
  14  -4  -2   50.50    2.12
  -4 -14  -2   50.31    4.31
 -14   4  -2   45.57    2.42
 -14   4  -2   47.05    2.55
  -4 -14   3   -0.33    0.85
 -14   4   3   -0.21    1.53
   4  14   3    0.64    0.83
  -4 -14   3    0.45    0.89
 -14   4   3    0.08    0.34
  14  -4   3    0.31    0.85
  -4 -14  -3    0.32    0.87
 -14   4  -3    0.26    0.77
  14  -4  -3    0.15    0.35
 -14   4  -3    1.01    1.11
   4  14   4    1.47    1.10
  -4 -14   4    1.66    1.12
 -14   4   4    3.10    1.25
  -4 -14   4    1.45    1.21
  -4 -14  -4    0.54    1.19
 -14   4  -4    1.67    0.85
  14  -4  -4    1.37    1.25
 -14   4  -4    1.13    1.10
  -4 -14   5    0.44    1.34
   4  14   5    1.74    1.22
  -4 -14   5    1.90    0.39
  14  -4   5    0.24    2.39
 -14   4   5    1.40    1.41
 -14   4  -5    0.94    1.24
  -4 -14  -5    0.96    1.29
  14  -4  -5    2.44    2.17
  -4 -14   6    2.63    0.68
 -14   4   6    2.45    1.71
  -4 -14   6    2.62    1.61
   4  14   6    3.41    1.37
  -4 -14  -6    3.53    1.55
 -14   4  -6    1.63    1.49
  14  -4  -6    3.29    1.55
  -4 -14   7    0.22    0.41
   4  14   7    0.48    0.96
 -14   4   7    2.97    2.10
  -4 -14   7    1.30    1.15
  -4 -14  -7   -0.04    1.09
  14  -4  -7   -0.65    1.14
 -14   4  -7   -0.17    1.14
   4  14   8    0.96    0.81
  -4 -14   8   -0.48    1.04
  -4 -14   8   -0.08    0.16
 -14   4   8    0.14    1.02
  -4 -14  -8   -0.12    0.97
  14  -4  -8    0.05    0.99
   4  14   9    0.04    0.96
  -4 -14   9    0.04    1.18
 -14   4   9   -1.11    1.24
  -4 -14  -9    0.27    1.14
  14  -4  -9   -0.52    1.16
  -4 -14  10   17.43    2.85
   4  14  10   18.62    2.33
 -14   4  10   17.21    2.78
  -4 -14 -10   18.52    2.95
  14  -4 -10   19.15    2.64
 -14   4  11    4.82    1.93
  -4 -14  11    0.47    2.94
   4  14  11    1.80    1.48
  -4 -14 -11    2.75    1.92
  14  -4 -11    3.06    1.67
  -4 -14  12    2.62    1.67
   4  14  12   -0.84    2.04
  -4 -14 -12    0.07    2.60
  14  -4 -12    0.60    1.60
  -4 -14  13   -0.01    1.53
   4  14  13   -0.88    1.88
  -4 -14 -13   -0.23    1.41
  14  -4 -13    0.11    1.45
   4  14  14    4.82    3.00
  -4 -14  14    4.15    2.54
  -4 -14 -14    7.96    2.33
  14  -4 -14    0.69    2.30
  -4 -15   0    0.77    0.86
 -15   4   0    0.11    0.80
  15  -4   0   -0.71    0.57
 -15   4   0    0.14    0.84
  15  -4   1    1.73    0.84
  -4 -15   1   -0.05    1.04
 -15   4   1    1.67    1.12
 -15   4   1    0.62    0.56
 -15   4  -1    1.01    0.78
  -4 -15  -1    1.30    1.76
 -15   4  -1    1.66    0.98
  15  -4  -1    0.51    0.60
 -15   4   2   23.95    2.24
  -4 -15   2   21.86    2.08
 -15   4   2   21.31    1.05
 -15   4  -2   19.60    1.76
  -4 -15  -2   19.28    3.30
  15  -4  -2   20.54    1.05
 -15   4  -2   22.02    2.94
  -4 -15   3   15.16    1.97
  -4 -15   3   15.16    1.82
  15  -4   3   15.56    1.94
 -15   4   3   13.83    3.19
 -15   4   3   14.16    0.91
   4  15   3   13.52    1.79
  -4 -15  -3   14.20    3.00
 -15   4  -3   13.80    1.66
 -15   4  -3   13.88    1.60
  15  -4  -3   14.19    0.59
   4  15   4    6.35    2.31
  -4 -15   4    5.99    1.62
  -4 -15   4    4.51    2.48
 -15   4   4    5.17    1.72
  15  -4   4    6.08    1.66
 -15   4  -4    4.98    1.20
 -15   4  -4    5.09    1.45
  -4 -15  -4    4.96    2.56
   4  15   5   19.47    2.11
  -4 -15   5   15.40    2.21
  -4 -15   5   15.43    0.77
 -15   4   5   18.88    2.50
  -4 -15   5   20.12    2.42
  15  -4   5   17.93    2.53
  -4 -15  -5   15.21    3.56
  15  -4  -5   17.95    2.43
 -15   4  -5   15.29    2.21
   4  15   6   12.84    1.88
  -4 -15   6   12.62    0.93
  -4 -15   6   13.64    2.28
 -15   4   6    9.33    2.38
  15  -4  -6   12.53    3.43
  -4 -15  -6   12.70    3.37
 -15   4  -6   10.63    2.13
  -4 -15   7    4.65    0.55
  -4 -15   7    4.60    1.77
   4  15   7    3.20    1.41
 -15   4   7    2.07    2.80
  -4 -15  -7    3.33    2.64
  15  -4  -7    3.99    1.72
   4  15   8    5.14    1.54
  -4 -15   8    5.75    1.88
 -15   4   8    4.29    1.94
  15  -4  -8    4.99    1.87
  -4 -15  -8    4.14    2.89
  -4 -15   9    4.31    1.93
   4  15   9    4.22    1.54
 -15   4   9    4.77    1.96
  -4 -15  -9    3.38    2.86
  15  -4  -9    3.29    1.88
   4  15  10    0.85    2.28
  -4 -15  10    4.12    2.86
 -15   4  10   -0.56    2.97
  15  -4 -10    3.86    2.71
  -4 -15 -10    4.70    2.93
  -4 -15  11    0.20    2.19
 -15   4  11   -2.11    1.51
   4  15  11   -0.50    1.80
  -4 -15 -11    0.20    1.46
  15  -4 -11    0.50    1.29
   4  15  12    1.63    1.43
  -4 -15  12    2.15    1.84
  -4 -15 -12   -0.10    1.79
  15  -4 -12    0.90    1.75
   4  15  13    1.01    1.41
  -4 -15  13    3.14    1.93
  -4 -15 -13    0.10    1.81
  15  -4 -13   -0.18    1.73
  -4 -15  14   -0.49    1.82
   4  15  14   -0.23    1.31
  15  -4 -14   -0.42    1.57
  -4 -15 -14   -0.16    1.62
 -16   4   0   26.23    2.47
 -16   4   0   26.46    2.47
  -4 -16   0   24.85    2.45
  16  -4   0   29.23    2.69
 -16   4   1   52.59    2.20
  -4 -16   1   53.06    3.24
 -16   4   1   54.93    3.47
  16  -4   1   48.34    2.72
 -16   4  -1   52.14    2.61
  -4 -16  -1   46.42    3.16
 -16   4  -1   53.90    4.40
  16  -4  -1   53.78    2.20
 -16   4   2    0.56    0.44
  -4 -16   2    0.18    1.00
  -4 -16   2   -0.59    0.97
  16  -4   2    0.31    0.87
 -16   4   2    0.75    1.05
 -16   4  -2    1.94    0.89
 -16   4  -2   -0.84    0.77
  16  -4  -2    0.17    0.68
  -4 -16  -2   -1.37    1.58
  16  -4   3   -0.65    0.92
 -16   4   3   -0.19    1.04
  -4 -16   3   -0.01    1.53
 -16   4   3    0.14    0.29
  -4 -16   3   -0.76    1.61
 -16   4  -3    1.24    0.80
 -16   4  -3    0.59    0.81
  16  -4  -3    0.30    0.41
  -4 -16   4   53.15    3.56
 -16   4   4   57.27    3.86
  -4 -16   4   52.78    5.32
   4  16   4   52.08    3.29
 -16   4  -4   51.57    3.31
 -16   4  -4   56.82    3.02
  -4 -16  -4   52.47    5.06
  -4 -16   5    1.50    1.15
   4  16   5    1.70    1.08
  -4 -16   5    2.57    1.33
  16  -4   5   -0.77    1.34
 -16   4   5    0.55    1.39
 -16   4  -5   -0.01    0.90
  -4 -16  -5    0.88    1.93
 -16   4  -5    1.69    1.20
  -4 -16   6    0.57    0.28
 -16   4   6    0.30    1.80
   4  16   6   -2.15    0.94
  -4 -16   6   -0.82    0.91
  -4 -16   6   -0.42    1.20
  16  -4  -6    0.10    1.18
 -16   4  -6    0.69    1.09
  -4 -16  -6   -0.80    1.64
  -4 -16   7    0.10    0.24
 -16   4   7    0.01    0.95
   4  16   7   -0.33    0.76
  -4 -16   7   -0.38    1.00
  16  -4  -7   -1.22    0.96
  -4 -16  -7    0.35    0.89
   4  16   8    2.78    1.43
 -16   4   8    2.87    1.83
  -4 -16   8    3.16    1.83
  16  -4  -8    1.95    1.76
  -4 -16  -8    2.48    1.62
 -16   4   9    5.36    2.23
   4  16   9    6.25    2.67
  -4 -16   9    5.63    2.16
  16  -4  -9    3.43    1.98
  -4 -16  -9    7.19    2.14
  -4 -16  10    0.34    2.72
 -16   4  10    3.66    1.75
   4  16  10    2.65    1.37
  -4 -16 -10    0.02    1.77
  16  -4 -10    0.67    1.57
   4  16  11    1.86    1.54
 -16   4  11    4.67    1.87
  -4 -16  11    4.62    1.93
  16  -4 -11   -0.09    1.73
  -4 -16 -11    0.19    1.99
   4  16  12    9.68    2.00
  -4 -16  12   10.59    2.66
  -4 -16 -12    0.23    2.59
  16  -4 -12    0.76    2.48
  -4 -16  13    1.33    1.96
   4  16  13   -1.58    1.36
  16  -4 -13   -1.08    1.64
  -4 -16 -13    0.17    1.73
  17  -4   0    0.29    0.62
 -17   4   0   -0.06    0.84
 -17   4   0    0.62    0.87
  -4 -17   0   -1.04    0.88
 -17   4   1   13.61    2.06
  17  -4   1   11.98    2.48
 -17   4   1   12.80    1.13
  -4 -17   1   13.07    2.00
  -4 -17  -1   11.70    1.93
 -17   4  -1   14.60    3.10
 -17   4  -1   11.38    1.46
  17  -4  -1   13.76    1.81
  -4 -17   2   10.50    1.89
 -17   4   2    8.94    2.06
 -17   4   2   11.87    0.96
  -4 -17   2   13.69    1.94
  17  -4   2    9.28    1.64
 -17   4  -2   11.04    1.75
  -4 -17  -2   10.30    2.96
 -17   4  -2   10.70    1.49
  17  -4  -2   10.18    0.91
  -4 -17   3   13.53    2.25
 -17   4   3   14.13    2.28
 -17   4   3   15.55    0.80
  -4 -17   3   12.23    2.10
  17  -4   3   15.10    2.01
  -4 -17  -3   18.09    3.33
  17  -4  -3   15.19    0.72
 -17   4  -3   16.01    1.83
 -17   4  -3   16.00    1.90
 -17   4   4    4.71    1.87
  17  -4   4    6.69    1.62
  -4 -17   4    5.99    1.63
  -4 -17   4    4.42    2.83
 -17   4  -4    6.14    1.48
 -17   4  -4    3.53    1.36
  -4 -17  -4    3.89    2.58
  -4 -17   5    1.83    1.71
 -17   4   5    3.81    1.57
  -4 -17   5    0.95    2.19
   4  17   5    2.03    1.32
  -4 -17  -5    3.19    1.54
 -17   4  -5    4.80    1.16
 -17   4  -5    4.25    1.37
  -4 -17   6    0.05    0.24
  -4 -17   6   -0.94    0.82
 -17   4   6    0.39    1.59
  -4 -17   6   -0.42    1.08
   4  17   6    0.19    0.84
 -17   4  -6    0.09    0.98
  -4 -17  -6   -0.55    0.93
  -4 -17   7    2.91    1.61
  -4 -17   7    0.91    0.30
 -17   4   7    2.26    1.52
   4  17   7    1.94    1.22
  -4 -17  -7    2.10    1.36
  17  -4  -7    1.82    1.50
 -17   4   8   11.84    2.60
  -4 -17   8   11.93    2.63
   4  17   8   10.74    3.16
  -4 -17  -8    9.34    2.32
  17  -4  -8   10.14    2.37
 -17   4   9   -0.98    2.27
  -4 -17   9    1.99    2.39
   4  17   9    0.81    1.11
  17  -4  -9   -0.31    2.09
  -4 -17  -9   -0.18    1.42
  -4 -17  10    0.80    1.64
 -17   4  10    0.09    1.64
   4  17  10    0.97    1.21
  -4 -17 -10   -0.14    1.57
  17  -4 -10    0.01    2.22
   4  17  11    5.25    2.12
  -4 -17  11   -0.87    1.72
 -17   4  11    1.49    1.75
  -4 -17 -11    0.25    1.75
  17  -4 -11   -0.60    1.53
 -17   4  12    0.85    1.57
  -4 -17  12    0.23    1.69
   4  17  12    1.04    1.33
  17  -4 -12   -0.28    1.49
  -4 -17 -12    0.00    1.70
  -4 -17  13    1.34    2.03
   4  17  13    1.28    1.45
  -4 -17 -13   -0.04    2.87
  17  -4 -13   -0.23    1.75
 -18   4   0   13.42    1.93
  -4 -18   0    8.73    1.96
  18  -4   0   11.97    1.34
 -18   4   0    9.43    1.31
 -18   4   1   17.57    2.07
  18  -4   1   17.27    1.75
  -4 -18   1   18.66    2.21
 -18   4   1   19.42    2.34
  18  -4  -1   16.06    1.34
 -18   4  -1   17.74    2.24
  -4 -18  -1   18.10    2.16
 -18   4  -1   15.76    2.49
  18  -4   2    4.91    1.43
 -18   4   2    5.87    0.82
 -18   4   2    5.46    1.75
  -4 -18   2    4.63    1.74
  -4 -18   2    3.32    2.53
 -18   4  -2    4.44    1.32
  -4 -18  -2    4.66    1.61
  18  -4  -2    5.66    0.77
 -18   4  -2    4.74    1.57
 -18   4   3   46.47    1.60
  -4 -18   3   42.94    3.62
  -4 -18   3   44.13    3.15
  18  -4   3   43.16    3.15
 -18   4   3   45.53    3.45
 -18   4  -3   42.29    2.95
 -18   4  -3   42.99    4.40
  -4 -18  -3   42.43    4.75
  18  -4  -3   45.94    1.79
  -4 -18   4   19.45    2.27
 -18   4   4   19.72    2.59
  18  -4   4   22.28    3.74
  -4 -18   4   21.82    2.75
 -18   4  -4   20.98    2.23
  -4 -18  -4   19.15    2.32
 -18   4  -4   21.73    2.14
 -18   4   5    3.83    1.78
  -4 -18   5    3.53    3.02
   4  18   5    3.84    1.44
  -4 -18   5    5.30    1.54
  -4 -18  -5    3.36    1.57
 -18   4  -5    3.95    1.27
 -18   4  -5    4.26    1.49
 -18   4   6    1.57    1.45
  -4 -18   6    0.68    1.19
  -4 -18   6    0.91    0.31
  -4 -18   6    2.27    1.55
   4  18   6    0.30    1.17
 -18   4  -6    0.29    0.97
  -4 -18  -6   -0.94    1.30
  -4 -18   7    6.34    1.69
   4  18   7    5.10    1.69
  -4 -18   7    5.65    2.17
 -18   4   7    6.20    2.13
  -4 -18  -7    4.69    1.93
  -4 -18   8    2.55    1.94
   4  18   8    3.81    1.53
 -18   4   8    3.37    1.92
  18  -4  -8   -0.25    1.79
  -4 -18  -8    2.84    1.76
 -18   4   9    3.67    1.96
   4  18   9    3.23    2.29
  -4 -18   9    3.52    3.02
  18  -4  -9    0.26    1.65
  -4 -18  -9   -0.06    1.89
   4  18  10   -0.25    1.18
  -4 -18  10   -0.22    1.54
 -18   4  10    1.25    1.57
  18  -4 -10    0.88    1.37
  -4 -18 -10   -0.01    1.53
   4  18  11    6.86    1.83
  -4 -18  11    6.93    2.43
 -18   4  11    5.03    2.49
  -4 -18 -11    0.07    2.33
  18  -4 -11    0.35    2.26
   4  18  12   -1.73    1.10
 -18   4  12    1.17    1.40
  -4 -18  12    1.69    1.43
  18  -4 -12    0.16    1.31
  -4 -18 -12    0.04    2.24
  -4 -19   0    0.37    0.88
  19  -4   0   -1.28    1.02
 -19   4   0    0.21    0.63
 -19   4   0   -0.05    1.45
 -19   4   1    0.50    1.20
  19  -4   1    0.57    1.47
  -4 -19   1    1.52    1.42
 -19   4   1    1.43    1.12
  -4 -19   1    0.73    1.11
  -4 -19  -1    0.59    1.13
 -19   4  -1    0.66    1.17
  19  -4  -1   -0.02    1.08
 -19   4  -1   -0.27    1.38
 -19   4   2    4.08    1.24
  -4 -19   2    2.06    1.49
 -19   4   2    3.89    1.68
  -4 -19   2    4.27    1.68
  19  -4   2    2.37    1.34
  -4 -19  -2    3.66    1.51
  19  -4  -2    4.61    1.12
 -19   4  -2    2.30    2.02
 -19   4  -2    3.80    1.48
  19  -4   3   12.17    1.91
  -4 -19   3    7.85    2.19
 -19   4   3    9.67    0.77
 -19   4   3    8.00    2.19
  -4 -19   3    7.67    1.84
 -19   4  -3    9.63    1.88
  19  -4  -3   10.34    0.66
 -19   4  -3    8.77    1.70
 -19   4   4   16.82    2.55
  -4 -19   4   16.50    2.73
  19  -4   4   16.40    2.28
 -19   4  -4   15.26    2.13
 -19   4  -4   17.47    2.06
  -4 -19  -4   15.03    2.29
  -4 -19   5   17.23    4.58
  -4 -19   5   20.77    2.41
  -4 -19  -5   17.89    2.53
 -19   4  -5   19.29    2.17
 -19   4   6    7.23    2.18
  -4 -19   6    5.41    2.91
   4  19   6    5.74    1.76
  -4 -19   6    7.12    0.50
  -4 -19   6    4.91    2.29
  -4 -19  -6    6.55    1.98
 -19   4  -6    7.99    1.55
   4  19   7   10.28    2.03
  -4 -19   7    0.21    2.77
  -4 -19   7   13.35    2.15
 -19   4   7   12.40    2.70
  -4 -19  -7   16.57    2.45
 -19   4  -7   13.44    1.81
  -4 -19   8    0.18    1.33
 -19   4   8    1.32    2.81
   4  19   8    1.53    2.00
  -4 -19   8    2.24    1.72
  -4 -19  -8    0.00    1.60
  -4 -19   9   -1.23    3.98
 -19   4   9    8.51    2.53
   4  19   9    8.80    1.86
  -4 -19  -9   -0.18    2.44
  -4 -19  10   -0.60    1.72
 -19   4  10    0.43    1.81
   4  19  10    1.85    1.33
  19  -4 -10   -0.36    1.66
  -4 -19 -10    0.38    2.68
 -19   4  11    3.01    3.21
   4  19  11    1.68    2.36
  -4 -19  11    0.96    1.97
  19  -4 -11    0.28    1.88
  -4 -19 -11    0.02    2.92
 -19   4  12   -0.41    2.07
  -4 -19  12    0.11    1.85
   4  19  12   -4.38    2.21
  -4 -19 -12   -0.06    1.83
  19  -4 -12    0.54    1.72
  20  -4   0   14.01    1.52
  -4 -20   0   14.18    2.14
 -20   4   0   14.12    1.57
 -20   4   1    8.95    1.82
  20  -4   1    6.67    1.44
  -4 -20   1    8.85    1.97
 -20   4   1    0.06    2.00
 -20   4  -1   12.57    1.88
  20  -4  -1    7.56    1.15
 -20   4  -1    7.94    1.44
  -4 -20  -1   10.82    1.90
 -20   4   2   -0.43    1.36
  -4 -20   2    0.87    1.20
 -20   4   2    0.48    0.98
  20  -4   2    0.73    1.06
  20  -4  -2    1.11    0.57
 -20   4  -2    0.66    1.51
  -4 -20  -2    0.86    1.21
  20  -4   3   -0.27    0.99
 -20   4   3    0.21    0.38
 -20   4   3    0.02    1.90
  -4 -20   3    0.85    1.15
  -4 -20   3    1.16    1.04
 -20   4  -3   -0.20    0.99
  -4 -20  -3    1.71    1.73
  20  -4  -3   -0.10    0.49
 -20   4  -3   -0.01    1.37
  -4 -20   4    3.62    1.83
  -4 -20   4    3.92    1.62
  20  -4   4    3.73    2.60
 -20   4   4    0.10    1.83
  -4 -20  -4    3.31    1.70
 -20   4  -4    4.43    1.53
  20  -4   5   -1.60    1.12
  -4 -20   5    0.08    1.30
 -20   4   5    0.01    2.01
  -4 -20   5   -0.16    1.04
  -4 -20  -5    0.18    1.14
 -20   4  -5    0.05    1.62
 -20   4  -5    0.51    0.95
 -20   4   6    0.69    1.06
  -4 -20   6    0.00    0.20
  -4 -20   6   -0.02    1.15
  20  -4   6   -1.99    1.04
  -4 -20   6    0.50    0.90
  -4 -20  -6    0.61    1.00
 -20   4  -6   -0.17    1.24
  -4 -20   7    0.02    1.90
  -4 -20   7    3.39    2.39
 -20   4   7    1.88    1.78
   4  20   7    2.72    1.44
  -4 -20  -7    3.52    1.70
 -20   4  -7   -0.05    1.26
 -20   4   8    1.48    3.23
   4  20   8    5.19    1.51
  -4 -20   8    2.62    2.09
  -4 -20   8    2.62    1.63
  -4 -20  -8   -0.14    1.94
 -20   4  -8   -0.07    1.32
  -4 -20   9    5.34    2.01
   4  20   9    7.85    1.99
  -4 -20   9    5.72    4.22
 -20   4   9    9.11    2.70
  -4 -20  -9   -0.08    4.09
  -4 -20  10    1.62    1.86
   4  20  10   -0.64    1.38
 -20   4  10    2.86    1.99
  -4 -20 -10    0.13    2.86
   4  20  11   -1.79    1.33
 -20   4  11    2.53    3.03
  -4 -20  11    0.73    1.87
  -4 -20 -11   -0.09    1.74
 -21   4   0    0.58    0.81
  21  -4   0    0.03    1.23
 -21   4   0    0.06    1.25
 -21   4   1    0.27    0.73
  -4 -21   1    2.07    1.15
  21  -4   1    0.98    1.39
  -4 -21   1   -0.45    1.20
 -21   4   1    0.24    1.28
  -4 -21  -1   -0.80    1.20
  21  -4  -1    0.61    1.09
 -21   4  -1    0.12    1.19
 -21   4  -1    0.88    0.91
  -4 -21   2    2.23    1.54
  -4 -21   2    2.21    1.44
 -21   4   2   -0.01    1.68
  21  -4   2    2.69    1.24
 -21   4   2    2.43    0.79
 -21   4  -2    2.91    1.21
  -4 -21  -2    0.74    1.47
  21  -4  -2    3.57    1.07
 -21   4  -2   -0.42    1.48
 -21   4   3    0.28    0.64
 -21   4   3   -0.23    2.02
  21  -4   3    1.62    1.04
  -4 -21   3   -0.08    1.21
 -21   4  -3   -0.05    1.06
  -4 -21  -3    1.57    1.88
 -21   4  -3   -0.58    1.44
  21  -4  -3    0.15    0.31
  -4 -21   4   28.79    3.58
  -4 -21   4   32.88    3.02
  21  -4   4   28.74    3.27
 -21   4   4   32.19    3.40
  -4 -21  -4   29.02    3.24
 -21   4  -4   34.55    3.02
 -21   4  -4   25.36    3.89
  21  -4   5   -0.73    1.82
 -21   4   5    0.01    1.22
  -4 -21   5    0.02    1.33
 -21   4  -5    0.01    0.99
 -21   4  -5   -1.09    1.37
  -4 -21  -5    1.87    1.21
  -4 -21   6    1.49    1.48
  -4 -21   6    0.03    2.87
  21  -4   6    2.79    2.56
 -21   4   6    4.09    1.65
 -21   4  -6    0.11    1.86
  -4 -21  -6    1.05    1.62
 -21   4  -6   -0.02    1.25
  -4 -21   7   -0.06    1.39
  -4 -21   7   -0.03    1.75
 -21   4   7    0.73    1.61
  21  -4   7    3.46    1.63
 -21   4  -7   -0.13    1.39
 -21   4  -7   -0.02    1.84
  -4 -21  -7    0.87    1.24
  -4 -21   8   19.07    3.37
  -4 -21   8   16.49    4.40
  21  -4   8   14.94    3.33
 -21   4   8   12.26    5.34
  -4 -21  -8   18.32    3.25
 -21   4  -8   16.10    2.35
 -21   4  -8   17.51    3.08
  -4 -21   9    0.58    1.18
  -4 -21   9    0.93    2.40
   4  21   9   -0.36    1.10
 -21   4   9   -0.09    1.57
 -21   4  -9    0.00    0.92
  -4 -21  -9   -0.20    2.29
  -4 -21  10    0.65    1.14
   4  21  10   -2.30    1.08
  -4 -21  10    1.15    1.52
 -21   4  10    2.12    1.70
  -4 -21 -10    0.28    1.42
  22  -4   0   27.60    2.17
 -22   4   0   26.61    3.34
 -22   4   0   29.92    3.29
  22  -4   1    2.36    1.25
 -22   4   1    3.54    1.09
  -4 -22   1    4.32    1.62
 -22   4   1   -0.26    2.90
  -4 -22  -1    3.83    1.66
 -22   4  -1    4.66    1.29
  22  -4  -1    3.69    0.99
 -22   4  -1   -0.11    1.69
 -22   4   2   -0.16    0.60
  22  -4   2   -0.22    0.91
 -22   4   2    0.56    1.22
  -4 -22   2   -0.10    1.21
  22  -4  -2    0.24    0.49
  -4 -22  -2    1.11    1.13
 -22   4  -2   -0.07    1.13
 -22   4  -2    0.66    0.90
  -4 -22   3    2.75    0.95
  22  -4   3   -0.02    0.92
 -22   4   3    0.14    1.64
  -4 -22  -3   -0.47    1.10
 -22   4  -3   -1.77    0.88
  22  -4  -3   -0.14    0.43
 -22   4  -3    0.03    0.98
  -4 -22   4    5.11    1.67
  -4 -22   4    0.01    1.96
 -22   4   4   -0.09    1.89
  22  -4   4    4.40    1.74
 -22   4  -4   -0.01    1.71
  -4 -22  -4    4.98    2.37
 -22   4  -4    4.85    1.40
  -4 -22   5   -0.17    1.23
  22  -4   5    0.05    1.24
  -4 -22   5    0.00    1.46
 -22   4   5    0.07    1.42
  -4 -22  -5    1.58    1.12
 -22   4  -5    0.02    1.81
 -22   4  -5    0.22    1.00
  22  -4   6   -0.18    1.14
  -4 -22   6    0.20    1.76
  -4 -22   6   -0.01    2.18
 -22   4   6   -0.56    1.24
 -22   4  -6    0.06    0.82
  -4 -22  -6    0.17    0.94
 -22   4  -6    0.01    0.95
 -22   4   7   -0.48    1.51
  -4 -22   7   -0.02    1.54
  -4 -22   7   -0.46    1.27
  -4 -22  -7   -0.02    1.44
 -22   4  -7   -0.08    1.03
 -22   4  -7    0.01    1.06
  -4 -22   8    2.89    1.63
  -4 -22   8    1.07    2.12
 -22   4   8    2.57    3.22
 -22   4  -8    0.02    2.02
  -4 -22  -8   -0.02    1.88
 -22   4  -8    0.19    1.28
 -22   4   9    3.19    2.05
  -4 -22   9    1.11    3.07
  -4 -22   9   -0.96    2.39
 -22   4  -9   -0.01    1.15
  -4 -23   0    0.80    1.13
 -23   4   0   -0.02    1.13
  -4 -23   0    0.31    1.27
 -23   4   0    0.16    0.89
  23  -4   0    0.91    1.32
 -23   4   1   -0.06    2.25
  23  -4   1    1.19    1.58
  -4 -23   1    2.12    1.21
 -23   4   1    1.08    1.45
  23  -4  -1    0.26    0.78
 -23   4  -1    0.21    1.68
 -23   4   2    0.32    1.07
  -4 -23   2    0.07    1.33
 -23   4   2   -0.22    1.28
  23  -4   2    0.78    1.00
  -4 -23  -2    0.51    1.17
  23  -4  -2   -0.01    0.85
 -23   4  -2   -0.11    1.03
 -23   4  -2    1.29    1.00
  -4 -23   3    0.62    0.95
 -23   4   3   -0.08    1.69
  23  -4   3    0.17    0.87
  -4 -23   3   -0.05    1.12
  -4 -23  -3   -0.73    0.88
 -23   4  -3    0.11    0.90
 -23   4   4   -0.06    1.37
  -4 -23   4    0.00    1.62
  23  -4   4    1.31    1.21
 -23   4  -4   -0.12    1.00
  -4 -23  -4    0.85    1.78
 -23   4  -4    0.07    1.22
  -4 -23   5    3.99    1.42
  -4 -23   5    0.02    1.92
  23  -4   5    0.33    2.29
 -23   4   5   -0.05    1.69
 -23   4  -5    0.08    1.12
 -23   4  -5   -0.02    1.34
  -4 -23  -5    0.64    1.30
 -23   4   6    0.00    1.61
  -4 -23   6    0.00    1.67
  23  -4   6    0.18    1.41
  -4 -23   6    1.30    1.37
 -23   4  -6    0.01    1.89
 -23   4  -6    0.09    1.04
  -4 -23  -6    0.65    1.24
  23  -4   7    0.15    1.78
  -4 -23   7    0.09    1.95
  -4 -23   7    2.16    1.64
 -23   4   7    5.64    1.94
  -4 -23  -7    0.08    1.82
 -23   4  -7   -0.05    1.33
 -23   4  -7   -0.05    1.37
  -4 -23   8    2.14    1.60
  23  -4   8   -0.06    1.44
  -4 -23   8   -1.24    1.37
 -23   4   8    2.11    2.80
 -23   4  -8   -0.15    1.03
 -23   4  -8   -0.05    1.04
 -24   4   0    0.03    1.02
 -24   4   0   -0.41    0.83
  24  -4   0    0.28    0.71
  -4 -24   0   -0.36    1.05
  -4 -24   1    0.19    1.99
 -24   4   1   -0.17    1.79
 -24   4   1    3.17    1.80
  24  -4   1    4.54    1.29
 -24   4  -1    0.36    1.55
  24  -4  -1    3.25    0.93
  -4 -24  -1   -0.03    2.64
 -24   4  -1    4.34    2.07
  -4 -24   2   -0.31    1.40
 -24   4   2   -0.31    1.45
  24  -4   2    2.26    1.13
  -4 -24  -2    0.20    1.38
 -24   4  -2    2.47    1.90
 -24   4  -2    0.21    1.23
 -24   4   3    0.11    1.36
  24  -4   3    0.63    1.09
  -4 -24   3   -0.21    1.60
 -24   4  -3    0.03    1.06
 -24   4  -3   -0.03    1.20
  -4 -24  -3    0.66    1.11
  24  -4   4    0.64    1.30
  -4 -24   4    1.61    1.44
 -24   4   4    0.12    1.53
  -4 -24  -4    1.16    2.11
 -24   4  -4    0.13    1.33
  -4 -24   5   -0.49    1.23
  24  -4   5    0.47    1.23
 -24   4   5    0.00    1.49
  -4 -24   5    0.04    1.66
 -24   4  -5    0.06    1.20
 -24   4  -5   -0.22    0.99
  -4 -24  -5   -0.69    1.15
  -4 -24   6    1.42    1.36
  -4 -24   6   -0.06    1.93
 -24   4   6   -0.02    1.70
  24  -4   6    0.19    1.43
  -4 -24  -6    0.27    1.31
 -24   4  -6    0.05    1.21
 -24   4  -6    0.05    1.27
 -24   4   7    1.16    2.10
  -4 -24   7    0.76    1.66
  24  -4   7    0.21    2.49
  -4 -24   7   -0.03    1.84
  -4 -24  -7    0.10    1.70
 -24   4  -7   -0.06    2.04
 -24   4  -7    0.23    1.27
  -4 -25   0    0.00    1.29
  25  -4   0    0.66    1.30
 -25   4   0   -0.04    1.24
 -25   4   0    1.01    1.56
  25  -4   1    0.03    1.20
  -4 -25   1    0.17    1.20
 -25   4   1    0.23    1.11
 -25   4  -1    0.07    0.94
  -4 -25  -1    1.83    1.02
  -4 -25  -1    0.10    1.14
 -25   4  -1   -1.58    0.84
  25  -4   2    3.09    1.41
  -4 -25   2    2.36    1.74
 -25   4   2    0.06    1.87
 -25   4  -2    0.83    2.33
  -4 -25  -2    2.86    1.74
  -4 -25   3   -0.26    1.76
  25  -4   3   -0.04    1.17
 -25   4   3   -0.06    1.50
 -25   4  -3   -0.44    1.17
  -4 -25  -3    1.52    1.27
 -25   4  -3    2.94    1.91
  25  -4   4   -0.13    1.23
  -4 -25   4    0.02    1.30
  -4 -25   4    0.32    1.82
 -25   4   4    0.34    1.51
 -25   4  -4    1.80    1.28
  -4 -25  -4   -0.60    1.26
 -25   4   5   -0.02    1.56
  -4 -25   5   -0.07    1.57
  25  -4   5    0.34    1.76
 -25   4  -5   -0.07    1.09
  -4 -25  -5   -0.04    1.43
 -25   4  -5   -0.05    1.03
 -26   4   1   -0.14    2.34
  -4 -26   1    4.42    2.17
  26  -4   1    4.18    1.34
  -4 -26   1    0.10    1.44
  -4 -26  -1    2.89    2.22
 -26   4  -1    0.04    1.70
 -26   4  -1    3.83    1.56
  26  -4   2    1.91    1.36
 -26   4   2   -0.11    3.32
  -4 -26  -2    0.19    1.78
 -26   4  -2    1.42    1.42
 -26   4   3    0.17    2.34
  26  -4   3    2.00    1.48
 -26   4  -3    2.58    1.54
  -4 -26  -3    2.12    1.64
 -26   4  -3   -0.04    1.92
   0  -5   0    0.61    0.42
   5   0   0    0.33    0.39
  -5   0   0    0.44    0.39
   5   0   1   76.06    2.32
  -5   0   1   80.33    2.22
   0   5   1   76.95    2.73
  -5   0   1   80.84    1.77
   0  -5   1   81.50    2.31
   0  -5  -1   76.50    2.04
   5   0  -1   81.76    1.65
  -5   0  -1   78.44    2.42
   0  -5   2   35.79    1.51
  -5   0   2   35.99    0.95
   0   5   2   36.18    1.29
   5   0   2   34.44    1.69
  -5   0   2   35.97    1.56
   0  -5  -2   37.02    1.38
  -5   0  -2   34.24    1.70
   5   0  -2   36.26    1.44
   0   5  -2   36.39    1.44
   5   0  -2   34.17    0.64
  -5   0   3  999.34   23.57
   5   0   3  989.83   29.57
  -5   0   3 1000.00   28.47
   0  -5   3 1003.67   22.48
   0   5   3  974.17   26.71
   0  -5   3  949.06   27.65
  -5   0   3 1043.37   25.40
  -5   0  -3  979.35   30.95
   5   0  -3  977.44   27.79
   0   5  -3  964.38   28.80
   0  -5  -3 1017.74   28.04
   0  -5   4  225.74    6.41
  -5   0   4  229.28    4.92
   5   0   4  227.09    6.84
   0   5   4  232.18    5.80
  -5   0   4  223.00    6.10
   5   0  -4  219.82    5.88
  -5   0  -4  227.44    6.79
   0   5  -4  229.96    3.98
   0   5  -4  223.66    7.27
   0  -5  -4  233.63    5.91
  -5   0   5  305.57    7.26
  -5   0   5  295.84    8.36
   0  -5   5  305.68    8.80
   5   0   5  304.95    9.29
   0   5   5  306.99    7.96
  -5   0  -5  306.31    9.25
   5   0  -5  299.04    8.15
   5   0  -5  305.58    6.91
   0   5  -5  295.47    8.31
   0   5  -5  293.75    5.77
   0  -5  -5  312.31    8.25
  -5   0   6   15.00    0.75
  -5   0   6   16.62    1.37
   5   0   6   15.56    1.61
   0   5   6   15.91    1.14
   0  -5   6   13.48    1.44
   0   5  -6   14.25    0.82
   5   0  -6   13.68    0.65
   0  -5  -6   15.62    1.94
  -5   0  -6   12.77    1.62
   5   0  -6   12.63    1.22
   0   5  -6   14.11    1.35
   5   0   7   88.75    3.82
  -5   0   7   91.88    3.52
   0   5   7   87.90    3.04
   0  -5   7   89.69    3.63
  -5   0   7   89.56    2.50
   5   0  -7   90.89    2.89
   5   0  -7   87.25    3.21
   0   5  -7   89.83    2.56
   0   5  -7   89.77    3.42
   0  -5  -7   90.59    3.28
  -5   0  -7   86.64    3.73
  -5   0   8   26.27    1.30
   0   5   8   26.66    1.71
   5   0   8   27.52    2.30
   0  -5   8   26.12    2.13
   5   0  -8   25.43    1.15
   0   5  -8   25.07    1.84
   5   0  -8   24.42    1.76
   0   5  -8   26.00    1.05
   0  -5  -8   25.82    1.76
  -5   0  -8   26.39    2.20
   0  -5   9    0.95    0.98
  -5   0   9    0.84    0.94
   0   5   9   -0.22    0.78
   0   5  -9    0.14    0.46
   5   0  -9    0.59    0.49
   0  -5  -9    1.74    0.74
   0   5  -9    0.70    0.83
  -5   0  -9    1.34    1.02
   5   0  -9    0.12    0.80
   0  -5  10   11.80    2.98
   0   5  10   11.27    1.54
  -5   0  10   11.99    1.21
   5   0 -10   10.08    1.04
   0  -5 -10   10.93    1.45
   5   0 -10    9.00    1.55
   0   5 -10    9.55    0.98
   0   5 -10    9.92    1.62
  -5   0  11    3.81    1.06
   0   5  11    4.13    2.03
   0  -5  11    5.24    1.76
   0  -5 -11    4.95    1.27
   5   0 -11    4.12    0.92
   0   5 -11    5.10    1.39
   5   0 -11    4.44    1.34
  -5   0  12   12.95    1.56
   0   5  12   12.47    1.76
   0  -5  12   14.58    2.29
   5   0  12   11.29    2.39
   5   0 -12   12.16    1.89
   5   0 -12   12.93    1.30
   0  -5 -12   12.85    2.81
   0   5 -12   11.93    1.92
   0   5 -12   13.09    1.26
   0   5  13    8.69    1.71
   0  -5  13    9.61    3.39
  -5   0  13    9.83    1.46
   5   0 -13    9.79    1.77
   0  -5 -13    8.74    1.72
   0   5 -13   11.12    1.79
   5   0 -13    8.35    2.02
   0   5 -13    9.00    1.22
  -5   0  14   -0.39    1.75
   0  -5  14    2.33    1.71
   0   5  14    3.15    1.35
   5   0 -14    2.69    1.55
   5   0 -14    2.91    2.16
   0  -5 -14    1.93    1.29
   0   5 -14   -0.02    1.47
   0   5 -14    5.29    1.37
   5   0  15    4.96    2.04
  -5   0  15    0.25    1.34
   0  -5  15    6.05    2.03
   0   5  15    4.22    1.53
   5   0 -15    4.70    1.12
   0  -5 -15    4.03    2.30
   5   0 -15    5.50    1.64
   0   5 -15   -0.01    1.07
   0   5 -15    7.42    2.33
  -5   0  16    0.07    2.88
   0   5  16    7.18    3.11
   5   0  16   10.36    2.72
   0  -5  16   14.92    2.85
   0  -5 -16    8.54    2.16
   5   0 -16   11.03    1.56
   5   0 -16    9.06    1.98
   0   5 -16   11.41    2.09
  -5   0 -16   10.23    2.06
   5   0  17    3.47    1.70
  -5   0  17   -0.02    1.10
   0   5  17   -0.12    1.34
   0  -5  17   -0.54    1.73
   5   0 -17    1.09    1.47
   0  -5 -17    0.68    1.40
  -5   0 -17    1.03    2.01
   5   0 -17    5.13    2.00
   0   5 -17   -1.14    1.25
   0   5 -17    0.00    1.34
   5   1   0  184.47    5.04
  -5  -1   0  182.73    4.35
   5   1   1  451.55   11.48
  -5  -1   1  451.57   10.84
  -5  -1   1  462.13   11.04
   1  -5   1  461.06    9.94
   1  -5   1  461.51   12.47
  -5  -1  -1  460.55   11.66
   1  -5  -1  456.53   11.22
   5   1  -1  473.75   10.35
  -5  -1   2  142.06    3.13
   5   1   2  144.78    4.15
  -5  -1   2  145.62    3.61
   1  -5   2  147.46    2.28
  -1   5   2  138.83    3.16
   1  -5   2  145.53    3.98
   5   1  -2  147.15    3.63
   1  -5  -2  146.19    3.35
  -1   5  -2  144.18    3.72
  -5  -1  -2  153.75    4.36
   5   1   3   84.52    2.97
  -5  -1   3   82.13    1.65
  -5  -1   3   85.75    1.65
  -5  -1   3   84.19    2.60
   1  -5   3   84.52    2.80
  -1   5   3   86.58    2.17
   5   1  -3   88.45    2.52
  -5  -1  -3   86.43    3.04
  -1   5  -3   89.31    3.66
   1  -5  -3   87.57    2.29
   5   1   4  300.11    8.80
  -5  -1   4  302.56    7.10
  -1   5   4  299.01    7.20
   1  -5   4  308.86    8.81
   5   1  -4  306.36    7.88
  -1   5  -4  301.49    9.67
  -1   5  -4  280.18    4.76
   1  -5  -4  310.78    7.63
  -5  -1  -4  312.97    9.12
  -5  -1   5    0.48    0.35
   5   1   5    1.40    0.78
  -5  -1   5    0.20    0.63
   1  -5   5    0.08    0.74
  -1   5   5    0.98    0.48
  -5  -1  -5    1.40    1.30
   5   1  -5    0.70    0.44
  -1   5  -5    0.44    0.67
  -1   5  -5    0.48    0.25
   1  -5  -5    0.14    0.50
   5   1  -5    0.72    0.55
   5   1   6  143.71    5.35
  -5  -1   6  151.28    5.78
  -5  -1   6  162.00    4.02
  -1   5   6  158.52    4.34
   1  -5   6  155.84    5.38
  -5  -1  -6  158.42    5.53
   5   1  -6  145.20    5.31
   5   1  -6  152.72    3.63
   1  -5  -6  157.67    4.54
  -1   5  -6  157.10    6.31
  -1   5  -6  155.94    3.25
   5   1   7    0.21    0.87
  -5  -1   7    0.70    0.71
  -1   5   7   -0.03    0.89
   1  -5   7    0.34    0.86
  -5  -1   7    0.94    0.45
  -5  -1  -7    0.19    0.88
   5   1  -7    0.46    0.62
   5   1  -7    0.71    0.62
   1  -5  -7    0.54    0.58
  -1   5  -7    0.10    0.75
  -1   5  -7    0.23    0.49
   5   1   8   75.59    3.75
   1  -5   8   76.99    5.23
  -1   5   8   72.24    2.78
  -5  -1   8   76.64    2.60
   5   1  -8   77.01    2.37
   5   1  -8   70.87    2.92
  -1   5  -8   77.78    2.66
  -1   5  -8   75.25    3.39
   1  -5  -8   76.99    3.96
   1  -5   9    3.26    1.42
   5   1   9    3.96    1.47
  -5  -1   9    3.23    0.86
  -1   5   9    5.63    1.04
  -5  -1  -9    4.51    1.38
  -1   5  -9    3.87    1.25
   5   1  -9    4.14    0.71
   5   1  -9    3.37    1.05
   1  -5  -9    4.12    1.56
   1  -5  -9    5.10    1.55
  -1   5  -9    5.23    0.65
  -5  -1  10    8.12    1.13
   1  -5  10    8.13    1.80
  -1   5  10    7.69    1.26
   5   1 -10    8.00    2.02
   5   1 -10    6.25    1.44
  -1   5 -10    7.01    0.87
   1  -5 -10    7.58    1.20
  -1   5 -10    6.40    1.50
  -5  -1  11    9.07    2.04
   1  -5  11    9.33    3.34
  -1   5  11    9.34    1.42
  -5  -1 -11    8.43    1.97
   5   1 -11    9.71    2.30
   5   1 -11    8.56    1.72
  -1   5 -11   10.22    1.71
   1  -5 -11    9.25    1.43
  -5  -1  12   73.50    3.57
  -1   5  12   74.46    3.62
   1  -5  12   75.15    4.85
   5   1 -12   76.10    3.76
  -1   5 -12   77.09    3.12
   1  -5 -12   75.36    4.89
   5   1 -12   72.34    3.19
   1  -5 -12   78.68    3.86
   1  -5  13   11.15    2.38
  -1   5  13   12.00    1.66
   5   1  13   10.14    2.33
  -5  -1  13    9.86    1.59
   5   1 -13    8.73    1.35
  -1   5 -13   10.67    1.87
   5   1 -13   10.97    1.76
  -1   5 -13   11.40    1.30
   1  -5 -13   10.07    2.57
   1  -5  14    2.65    1.40
  -5  -1  14   -0.21    1.50
  -1   5  14    0.70    0.98
   5   1 -14   -0.29    0.78
   5   1 -14    0.61    1.06
   1  -5 -14    0.94    0.96
  -1   5 -14   -0.04    1.25
  -1   5 -14    0.58    1.10
  -5  -1  15    0.28    0.96
   1  -5  15    0.51    1.47
  -1   5  15   -0.03    1.01
   5   1 -15    1.53    1.27
  -1   5 -15    0.95    1.08
   5   1 -15    0.24    1.05
  -1   5 -15    0.06    0.77
   1  -5 -15   -0.12    0.95
  -5  -1  16    0.59    2.13
   1  -5  16    5.06    3.12
  -1   5  16   -0.08    2.08
   5   1  16    2.27    1.90
  -5  -1 -16    1.32    2.49
   5   1 -16    1.74    2.12
  -1   5 -16    2.70    2.29
   5   1 -16    2.81    1.09
  -1   5 -16   -0.02    1.68
   1  -5 -16   -0.25    2.14
  -5  -1  17    0.59    1.08
   5   1  17   -2.24    1.49
   1  -5  17    3.43    1.60
  -1   5  17   -0.31    1.06
  -5  -1 -17    1.64    1.33
   5   1 -17    0.33    0.85
   5   1 -17    0.11    1.04
  -1   5 -17   -0.56    1.12
   1  -5 -17   -0.36    1.12
   2  -5   0   -0.05    0.37
  -5  -2   0    0.83    0.47
   5   2   0    0.30    0.70
   2  -5   0    0.15    0.36
  -5  -2   1   31.50    1.66
   2  -5   1   32.39    0.87
   2  -5   1   32.61    1.37
   5   2   1   32.29    1.52
   2  -5  -1   34.50    1.08
  -5  -2  -1   33.76    1.60
   2  -5  -1   31.76    2.15
  -2   5  -1   31.90    1.33
   5   2  -1   33.60    1.05
  -5  -2   2    0.64    0.49
  -5  -2   2    0.90    0.32
   2  -5   2    1.21    0.20
   2  -5   2    1.90    0.62
   5   2   2    0.59    1.13
  -2   5   2    1.43    0.34
  -2   5  -2    0.46    0.18
   2  -5  -2    1.06    0.36
  -5  -2  -2    0.53    0.70
   2  -5  -2    1.35    0.67
  -2   5  -2    0.51    0.91
   5   2   3  159.81    6.15
  -5  -2   3  157.68    3.26
  -5  -2   3  152.40    3.24
  -5  -2   3  163.09    4.97
  -2   5   3  158.04    3.42
   2  -5   3  155.76    4.58
   5   2  -3  158.07    3.89
   2  -5  -3  166.69    4.29
  -2   5  -3  165.55    5.73
   2  -5  -3  157.97    4.83
  -5  -2  -3  164.99    4.94
  -5  -2   4 1015.02   29.32
   5   2   4 1030.41   31.75
   2  -5   4 1035.28   33.96
  -2   5   4  984.25   26.58
  -5  -2   4 1033.60   28.78
  -2   5  -4  996.91   30.30
   2  -5  -4 1040.36   32.52
  -5  -2  -4 1029.45   34.15
   5   2  -4 1041.98   29.68
   2  -5  -4 1037.41   28.50
  -5  -2   5  225.43    5.38
   5   2   5  221.30    6.96
   2  -5   5  229.97    8.56
  -5  -2   5  218.04    7.02
  -2   5   5  228.52    5.40
   5   2  -5  218.21    5.76
   2  -5  -5  231.87    7.35
   2  -5  -5  220.27    5.50
  -2   5  -5  228.63    6.87
  -5  -2  -5  229.27    7.15
  -5  -2   6   50.37    2.13
  -2   5   6   51.01    1.72
   2  -5   6   48.44    3.79
   5   2   6   47.13    2.61
  -5  -2   6   53.23    1.73
   5   2  -6   47.94    2.65
  -2   5  -6   48.68    2.49
  -2   5  -6   51.06    1.23
   2  -5  -6   49.78    1.84
   5   2  -6   50.25    1.55
   2  -5  -6   50.09    2.76
  -5  -2  -6   49.12    2.74
   5   2   7   12.54    1.69
  -5  -2   7   12.98    1.31
   2  -5   7   14.05    1.70
  -5  -2   7   13.80    1.54
  -2   5   7   13.44    1.01
   5   2  -7   13.19    1.31
   2  -5  -7   13.32    1.79
  -5  -2  -7   13.70    1.67
   2  -5  -7   13.69    1.62
  -2   5  -7   14.42    1.52
   5   2  -7   13.03    1.13
  -2   5  -7   14.28    1.02
  -5  -2   8  141.09    4.37
   2  -5   8  151.27    5.89
  -5  -2   8  135.72    4.78
   5   2   8  142.99    5.65
  -2   5   8  141.63    5.17
   5   2  -8  145.76    4.14
   5   2  -8  137.81    5.48
  -2   5  -8  144.10    5.32
  -2   5  -8  147.07    3.74
   2  -5  -8  142.34    4.37
   5   2   9    7.02    1.59
  -5  -2   9    5.79    1.04
   2  -5   9    7.04    2.60
  -2   5   9    6.92    1.04
   5   2  -9    6.88    1.08
   5   2  -9    5.90    1.30
  -2   5  -9    5.70    1.41
  -2   5  -9    8.14    1.18
   2  -5  -9    7.15    1.01
  -5  -2  10   -0.05    0.63
   5   2  10    0.52    0.96
  -2   5  10    0.68    0.59
   2  -5  10   -0.40    0.98
   5   2 -10    0.56    0.64
   5   2 -10    0.84    0.81
  -2   5 -10   -0.25    0.80
  -2   5 -10   -0.23    0.45
   2  -5 -10   -0.48    0.61
   2  -5 -10   -0.27    1.01
  -2   5  11    0.48    0.71
   2  -5  11    0.41    1.17
  -5  -2  11   -0.60    1.19
   5   2 -11   -0.56    0.76
   5   2 -11    0.51    0.63
   2  -5 -11   -0.71    1.21
  -2   5 -11    1.15    0.98
  -5  -2  12    7.02    1.39
   2  -5  12    6.86    2.13
  -2   5  12    5.17    1.29
   2  -5 -12    6.72    2.22
  -5  -2 -12    5.75    1.85
   5   2 -12    7.17    1.83
  -2   5 -12    6.26    1.76
  -2   5 -12    6.39    1.11
   5   2 -12    7.45    1.39
  -5  -2  13    6.07    1.46
   2  -5  13    6.60    2.19
  -2   5  13    7.08    1.35
   5   2 -13    5.07    1.89
   5   2 -13    7.07    1.44
  -2   5 -13    6.10    1.65
   2  -5 -13    4.96    1.39
  -5  -2  14    4.62    2.15
  -2   5  14    3.10    1.25
   2  -5  14    4.69    3.17
   5   2 -14    3.60    2.05
  -2   5 -14    2.23    2.35
   2  -5 -14    3.46    1.24
   5   2 -14    3.81    1.71
  -5  -2  15   -0.18    0.90
  -2   5  15    0.23    1.27
   2  -5  15   -0.11    1.33
   5   2 -15   -0.31    0.70
   5   2 -15   -0.09    0.85
  -2   5 -15    0.43    0.98
   2  -5 -15    0.03    1.25
   2  -5  16   13.02    3.61
  -2   5  16    0.15    1.48
  -5  -2  16    0.71    1.62
   5   2  16   11.25    3.30
  -5  -2 -16    8.85    1.78
   2  -5 -16   -0.42    1.44
   5   2 -16   -0.10    1.46
  -2   5 -16    5.77    1.65
  -2   5 -16   -0.05    1.16
   5   2 -16    8.84    1.29
  -5  -2  17   -0.13    2.15
   2  -5  17    2.92    2.03
   5   2  17    1.24    1.82
  -2   5  17   -0.11    1.27
   5   2 -17   -0.01    1.21
  -5  -2 -17    3.25    4.24
   5   2 -17    0.76    1.75
   2  -5 -17    3.08    1.98
  -2   5 -17    4.64    2.17
   5   3   0    1.58    0.59
  -5  -3   0    2.43    1.09
   3  -5   0    1.92    0.50
  -3   5   0    2.21    0.47
   3  -5   0    2.48    0.48
  -3   5   0    2.33    0.51
   5   3   1    0.96    0.54
  -5  -3   1    0.56    0.42
   3  -5   1    0.33    0.27
  -3   5   1    0.18    0.50
   3  -5   1    0.20    0.47
   5   3  -1    0.41    0.38
  -5  -3  -1   -0.09    0.59
   3  -5  -1    0.42    0.30
  -3   5  -1    0.51    0.45
   3  -5  -1    0.82    0.51
  -3   5  -1    0.81    0.48
  -5  -3   2   47.74    1.50
   5   3   2   51.00    2.04
  -5  -3   2   50.34    1.84
   3  -5   2   48.06    1.88
  -3   5  -2   49.85    1.22
   3  -5  -2   50.65    1.52
  -3   5  -2   50.52    2.58
  -5  -3  -2   49.69    2.99
   3  -5  -2   49.13    1.95
  -5  -3   3   85.77    2.03
   5   3   3   83.22    3.02
  -5  -3   3   86.57    2.11
   3  -5   3   84.85    2.95
  -3   5   3   81.56    1.74
  -5  -3   3   84.53    2.96
  -5  -3  -3   86.88    3.14
   3  -5  -3   84.69    4.14
  -3   5  -3   78.36    1.42
   3  -5  -3   88.78    1.93
  -3   5  -3   85.01    3.80
  -5  -3   4    1.62    0.77
  -5  -3   4    1.16    0.59
   5   3   4    0.98    0.91
  -3   5   4    1.62    0.34
   3  -5   4    1.70    0.90
  -5  -3  -4    1.98    0.90
  -3   5  -4    1.64    0.79
   5   3  -4    1.79    0.82
   3  -5  -4    1.91    0.65
   3  -5  -4    2.84    0.91
  -5  -3   5    0.46    0.48
   5   3   5    2.13    1.37
  -5  -3   5    1.11    0.57
  -3   5   5    0.68    0.36
   3  -5   5    1.12    0.86
   3  -5  -5    0.69    0.66
   5   3  -5    0.49    0.84
  -5  -3  -5    1.70    0.88
  -3   5  -5    0.92    1.29
   3  -5  -5    0.92    0.90
   5   3   6    9.42    1.52
  -5  -3   6   10.64    0.94
  -5  -3   6   12.89    1.65
   3  -5   6   10.74    1.60
  -3   5   6    9.57    1.13
   5   3  -6    9.95    0.78
   5   3  -6   12.57    1.47
  -5  -3  -6   11.55    1.58
  -3   5  -6   11.94    1.45
   3  -5  -6   10.28    1.62
   3  -5  -6   10.29    1.27
   5   3   7   85.38    3.80
  -5  -3   7   88.80    3.65
  -5  -3   7   89.64    3.14
   3  -5   7   90.47    3.95
  -3   5   7   86.74    3.15
   5   3  -7   89.43    2.65
   5   3  -7   83.94    2.74
  -5  -3  -7   94.54    4.03
   3  -5  -7   85.77    2.68
   3  -5  -7   87.02    3.97
  -3   5  -7   88.57    3.70
  -5  -3   8   -0.35    0.57
   5   3   8    0.26    0.79
  -5  -3   8    0.32    0.52
   3  -5   8    0.04    0.84
  -3   5   8   -0.23    0.43
   5   3  -8   -0.39    0.80
   5   3  -8   -0.13    0.66
  -5  -3  -8   -0.18    0.81
  -3   5  -8    0.09    0.74
   3  -5  -8    0.59    0.68
   3  -5  -8    1.12    0.85
  -5  -3   9   -0.02    0.63
   5   3   9   -0.05    0.93
   3  -5   9    0.05    0.99
  -3   5   9    1.16    0.80
  -3   5  -9   -0.44    0.85
   5   3  -9    0.60    0.51
   5   3  -9   -0.22    0.57
   3  -5  -9   -0.34    0.85
  -3   5  -9    0.22    0.43
   5   3  10   10.27    1.98
  -5  -3  10   10.95    1.42
   3  -5  10   11.93    3.32
  -3   5  10    9.65    1.85
  -3   5 -10    9.66    2.82
   5   3 -10    9.83    1.25
   5   3 -10    8.46    1.09
   3  -5 -10   11.67    1.84
  -5  -3  11   11.60    2.45
   5   3  11   11.50    2.22
  -3   5  11   12.85    1.36
   3  -5  11   13.69    2.45
   5   3 -11   13.80    1.43
   5   3 -11   11.07    1.33
  -3   5 -11   12.34    1.19
   3  -5 -11   11.42    1.40
  -3   5 -11   12.50    3.12
   3  -5 -11   12.69    2.36
   5   3  12    2.59    1.60
  -5  -3  12    3.19    1.92
   3  -5  12    2.29    2.85
  -3   5  12    4.22    0.99
   5   3 -12    2.43    0.97
   5   3 -12    4.11    1.09
  -3   5 -12    3.48    0.91
  -3   5 -12    1.80    1.49
   3  -5 -12    2.27    1.02
  -5  -3  13    5.24    1.45
  -3   5  13    5.21    1.85
   3  -5  13    6.70    2.12
   5   3 -13    5.40    1.25
   5   3 -13    3.91    1.13
  -3   5 -13    2.93    1.63
  -5  -3 -13    5.28    1.62
   3  -5 -13    4.02    1.90
  -5  -3  14    2.88    1.32
   3  -5  14    2.64    1.94
  -3   5  14   -0.02    1.67
   5   3 -14    3.43    1.16
  -3   5 -14    4.25    1.48
   5   3 -14    2.60    1.06
   3  -5 -14    2.65    1.06
  -3   5 -14    0.05    1.00
   3  -5  15    6.85    2.11
  -5  -3  15   -0.85    2.30
  -3   5  15   -0.17    1.22
  -3   5 -15    7.14    2.56
   5   3 -15    2.95    1.13
   3  -5 -15   -0.31    1.19
  -5  -3 -15    3.19    1.79
   5   3 -15    4.84    1.23
   5   3  16    4.27    1.71
  -3   5  16    0.06    1.15
  -5  -3  16   -0.47    1.41
   3  -5  16    3.06    1.95
  -3   5 -16    3.39    1.41
   5   3 -16   -0.01    1.69
  -3   5 -16    0.00    0.95
   5   3 -16    1.24    1.67
  -5  -3 -16    2.32    1.68
   3  -5 -16    0.09    1.70
  -3   5  17    0.33    1.11
   5   3  17    1.89    1.73
  -5  -3  17   -0.31    1.39
   3  -5  17    0.73    2.01
   5   3 -17    2.20    1.04
  -5  -3 -17    1.17    2.83
  -3   5 -17    1.83    1.34
   3  -5 -17   -0.18    1.15
   5   3 -17    0.00    1.13
   4  -5   0   -0.36    0.31
   4  -5   0   -0.06    0.29
  -4   5   0    0.16    0.26
  -4   5   0    0.36    0.31
   5   4   0   -0.22    0.37
   5   4   1   66.40    2.14
  -5  -4   1   60.95    1.79
   4  -5   1   59.90    1.44
  -4   5   1   64.61    2.78
   4  -5   1   61.13    1.97
  -5  -4  -1   67.78    3.20
  -4   5  -1   61.22    1.89
   4  -5  -1   58.64    2.67
   4  -5  -1   61.73    1.95
   5   4  -1   61.31    1.75
  -5  -4   2   54.72    1.56
  -4   5   2   51.07    2.88
   5   4   2   53.42    2.95
   4  -5   2   52.49    2.05
  -4   5  -2   54.20    1.20
  -5  -4  -2   55.38    2.19
   4  -5  -2   52.37    1.18
   4  -5  -2   55.08    2.82
   4  -5  -2   53.88    1.14
  -4   5  -2   52.64    1.92
  -5  -4   3   47.24    2.01
   5   4   3   49.14    2.19
  -5  -4   3   48.95    1.44
   4  -5   3   45.56    2.10
  -4   5   3   45.89    2.11
   4  -5  -3   46.68    1.05
  -4   5  -3   47.52    2.03
  -4   5  -3   47.36    0.95
   4  -5  -3   45.45    2.13
  -5  -4  -3   50.62    2.23
   5   4   4   36.25    2.01
  -5  -4   4   37.44    1.37
  -5  -4   4   36.64    1.39
   4  -5   4   33.79    2.05
  -4   5   4   35.20    0.85
  -5  -4  -4   35.79    2.06
  -4   5  -4   37.01    1.94
   4  -5  -4   37.74    1.31
   4  -5  -4   35.91    3.06
  -5  -4   5   65.86    2.21
   5   4   5   69.56    3.04
  -5  -4   5   66.25    2.17
   4  -5   5   65.47    3.14
  -4   5   5   68.65    1.98
   5   4  -5   68.83    2.07
   4  -5  -5   69.05    3.13
   4  -5  -5   66.71    1.74
  -4   5  -5   64.45    2.92
  -5  -4  -5   66.03    3.16
   5   4   6  264.69    8.47
  -5  -4   6  264.44    7.24
   4  -5   6  267.40   10.77
  -5  -4   6  262.48    7.19
  -5  -4  -6  274.23    8.98
   5   4  -6  250.84    6.48
  -4   5  -6  257.72    8.41
   4  -5  -6  257.71    8.58
   4  -5  -6  259.34    6.29
  -5  -4   7   26.66    2.21
   5   4   7   26.45    2.16
  -5  -4   7   25.48    2.20
   4  -5   7   26.82    2.34
  -4   5   7   26.93    1.54
  -5  -4  -7   28.39    2.27
   5   4  -7   25.71    1.29
   5   4  -7   26.29    1.34
   4  -5  -7   25.86    2.21
   4  -5  -7   24.14    1.10
  -4   5  -7   28.85    2.09
   5   4   8    3.08    1.24
  -5  -4   8    3.38    0.87
  -4   5   8    2.85    0.91
   4  -5   8    2.61    1.35
  -5  -4   8    3.29    0.84
  -5  -4  -8    2.15    1.30
   5   4  -8    2.08    0.69
   5   4  -8    1.63    0.70
   4  -5  -8    2.83    1.29
  -4   5  -8    2.92    1.16
   4  -5  -8    2.59    0.60
   5   4   9   20.79    2.31
  -5  -4   9   23.05    1.74
  -4   5   9   21.97    1.23
   4  -5   9   19.00    2.51
   5   4  -9   20.79    1.39
  -5  -4  -9   20.27    2.28
   5   4  -9   20.65    1.42
   4  -5  -9   21.64    1.27
  -4   5  -9   18.93    2.20
  -5  -4  10   19.59    1.82
   4  -5  10   23.39    2.77
  -4   5  10   18.44    1.39
   5   4 -10   19.23    1.46
   5   4 -10   17.19    2.19
   4  -5 -10   19.15    1.42
  -4   5 -10   20.16    2.35
  -5  -4  11    0.96    0.87
   4  -5  11    0.95    1.37
  -4   5  11    0.33    1.03
   5   4 -11   -0.38    1.09
  -4   5 -11    0.69    0.62
  -4   5 -11   -0.22    1.11
   4  -5 -11    0.31    0.66
   5   4 -11   -0.20    1.11
   5   4  12   -0.49    1.15
  -4   5  12    0.22    1.02
   4  -5  12   -1.24    1.31
  -5  -4  12   -1.15    1.39
   5   4 -12   -0.75    1.17
   5   4 -12    0.19    1.08
   4  -5 -12    0.21    1.05
  -4   5 -12   -1.56    1.77
  -4   5 -12   -0.35    0.65
   4  -5 -12    0.40    1.18
   4  -5  13    6.23    2.29
  -5  -4  13    5.41    2.46
   5   4  13    7.12    1.88
   5   4 -13    5.51    1.81
   5   4 -13    2.86    1.89
   4  -5 -13    5.08    1.16
  -4   5 -13    6.54    1.74
   5   4  14   -0.64    1.27
  -5  -4  14    0.30    1.11
  -4   5  14   -0.10    0.82
   4  -5  14    0.99    1.50
   5   4 -14    1.52    1.28
  -4   5 -14   -0.03    0.81
  -4   5 -14    1.86    1.18
   4  -5 -14   -0.08    0.78
   5   4 -14    0.53    0.81
  -5  -4 -14    0.57    1.32
  -5  -4  15   -0.35    1.18
   4  -5  15    5.36    1.63
  -4   5  15   -0.12    0.86
   5   4 -15    0.14    0.84
   5   4 -15    0.37    0.86
  -4   5 -15    0.74    1.26
  -5  -4 -15    0.00    1.26
   4  -5 -15    0.06    1.30
  -4   5 -15    0.02    0.81
   5   4  16    1.88    1.91
   4  -5  16    1.81    1.51
  -4   5  16    0.13    0.75
  -5  -4  16    0.46    1.73
  -5  -4 -16    0.52    1.50
  -4   5 -16    0.06    1.10
   4  -5 -16    0.24    0.75
  -4   5 -16   -0.95    1.74
   5   4 -16   -1.13    0.81
   5   4 -16    0.03    0.77
  -5  -4  17   -0.04    1.39
   4  -5  17    0.36    2.00
   5   4  17    4.47    1.65
  -4   5  17    0.19    1.55
  -5  -4 -17    3.07    2.69
  -4   5 -17   -1.46    1.42
   4  -5 -17    0.01    0.99
   5   4 -17   -0.08    1.63
   5   4 -17    1.65    1.08
   5   5   0   78.90    2.33
   5  -5   0   77.78    2.65
   5  -5   0   77.29    2.10
  -5   5   0   78.55    2.49
  -5   5   0   79.72    2.23
  -5  -5   0   79.43    2.40
   5   5   1   82.51    2.54
  -5  -5   1   79.20    2.22
   5  -5   1   80.35    2.46
   5  -5   1   77.16    1.84
  -5   5   1   76.48    1.69
  -5   5   1   77.31    2.42
   5  -5  -1   79.39    2.41
  -5  -5  -1   83.25    3.63
  -5   5  -1   76.55    2.24
   5  -5  -1   78.14    1.84
  -5   5  -1   79.42    2.00
   5   5  -1   76.07    2.81
  -5  -5   2  191.14    4.64
  -5   5   2  189.73    5.36
   5  -5   2  199.88    6.62
   5   5   2  201.90    5.45
  -5  -5  -2  197.54    5.52
  -5   5  -2  200.83    4.24
   5  -5  -2  195.67    3.97
   5  -5  -2  190.72    5.36
  -5   5  -2  195.79    5.30
   5   5   3   15.20    2.07
  -5  -5   3   13.98    0.86
  -5  -5   3   13.78    1.17
  -5   5   3   13.41    1.28
   5  -5   3   14.92    1.35
   5  -5  -3   14.38    0.62
   5  -5  -3   14.49    1.27
  -5  -5  -3   12.14    1.33
  -5   5  -3   13.05    1.24
  -5   5  -3   13.67    0.53
   5  -5  -3   12.96    0.42
   5   5   4   78.64    4.22
  -5  -5   4   78.27    2.18
  -5  -5   4   77.91    3.07
  -5   5   4   73.45    3.14
   5  -5   4   79.24    3.32
  -5   5  -4   77.61    3.02
   5  -5  -4   75.89    3.06
   5  -5  -4   77.85    1.57
  -5  -5  -4   80.43    3.24
  -5   5   5  126.68    2.80
  -5  -5   5  125.61    3.40
   5  -5   5  127.10    4.88
  -5  -5   5  120.35    3.57
   5   5   5  122.31    4.52
  -5  -5  -5  130.40    6.48
   5  -5  -5  124.73    4.66
  -5   5  -5  120.97    5.83
   5  -5  -5  128.50    3.15
   5   5   6    4.07    1.25
  -5  -5   6    3.65    0.72
  -5  -5   6    3.33    0.85
   5  -5   6    4.35    1.39
  -5   5   6    3.93    0.38
   5  -5  -6    4.88    0.65
   5  -5  -6    2.99    1.24
   5   5  -6    3.25    0.63
  -5   5  -6    3.43    2.00
  -5  -5  -6    5.56    2.16
   5  -5   7    0.16    1.05
  -5   5   7    0.64    0.51
  -5  -5   7   -0.59    1.09
  -5  -5   7    0.79    0.55
   5   5   7   -1.33    0.91
   5   5  -7    0.45    0.45
  -5   5  -7    0.05    1.48
   5  -5  -7    0.80    0.35
   5   5  -7    0.23    0.54
  -5  -5  -7   -0.48    1.68
   5  -5  -7    0.93    0.94
   5   5   8   25.30    2.45
  -5  -5   8   25.85    1.83
  -5   5   8   25.04    1.57
  -5  -5   8   29.45    2.36
   5  -5   8   24.91    2.63
  -5   5  -8   24.94    3.55
  -5  -5  -8   36.36    2.67
   5   5  -8   26.60    1.94
   5   5  -8   25.18    1.52
   5  -5  -8   25.32    2.44
   5  -5  -8   25.23    1.13
  -5   5   9    6.70    1.25
   5   5   9    8.88    2.84
  -5  -5   9    9.66    1.40
   5  -5   9    8.02    2.05
   5  -5  -9    9.27    1.87
  -5  -5  -9    9.65    1.80
   5   5  -9    7.38    1.70
  -5   5  -9   10.83    2.75
   5  -5  -9    8.85    0.84
   5   5  -9    8.96    0.95
  -5  -5  10   13.50    1.73
  -5   5  10   14.21    1.63
   5  -5  10   15.79    2.52
  -5  -5 -10   13.90    2.16
   5   5 -10   12.02    1.79
   5  -5 -10   12.62    1.10
  -5   5 -10   13.45    2.14
   5  -5 -10   14.52    2.28
   5   5 -10   12.33    1.35
  -5   5  11    2.79    0.74
  -5  -5  11    2.06    1.18
   5  -5  11    4.72    1.77
   5   5 -11    2.74    1.31
   5   5 -11    1.80    0.91
  -5   5 -11    2.71    1.44
   5  -5 -11    1.91    0.75
   5   5  12   -0.15    1.81
  -5  -5  12    1.47    0.98
   5  -5  12    0.69    1.39
  -5   5  12    0.43    0.59
   5   5 -12    0.67    0.75
  -5  -5 -12   -0.37    1.13
   5   5 -12    0.37    1.02
   5  -5 -12    0.42    1.89
  -5   5 -12    0.64    0.69
   5  -5 -12   -0.49    0.99
  -5   5 -12   -0.66    1.13
   5   5  13    0.45    1.63
  -5  -5  13   -0.37    0.90
   5  -5  13    1.19    1.98
  -5   5  13   -0.08    0.56
   5   5 -13    1.16    0.93
   5  -5 -13   -0.07    0.55
  -5   5 -13   -0.67    1.00
  -5   5 -13    0.06    0.64
   5  -5 -13   -0.28    1.06
   5   5 -13    0.24    0.67
   5  -5  14    4.98    1.96
  -5  -5  14    5.12    2.37
  -5   5  14   -0.10    0.97
   5   5  14    6.28    1.65
  -5  -5 -14    1.28    2.64
   5   5 -14    0.11    1.56
   5  -5 -14    4.28    1.79
  -5   5 -14    6.37    1.63
  -5   5 -14   -0.02    1.69
   5   5 -14    3.31    1.13
   5  -5 -14    0.08    0.93
   5   5  15    1.24    1.23
  -5  -5  15    0.04    1.09
  -5   5  15   -0.16    1.10
   5  -5  15   -4.64    2.28
  -5   5 -15   -0.04    0.75
  -5  -5 -15   -0.51    1.20
   5   5 -15   -0.08    1.10
   5   5 -15   -0.56    0.80
  -5   5 -15    0.80    0.92
   5  -5 -15   -0.21    0.69
   5   5  16    1.28    1.35
  -5  -5  16   -0.69    1.21
   5  -5  16    2.83    1.73
  -5   5  16    0.18    0.77
  -5   5 -16    0.51    1.07
  -5   5 -16    0.00    0.82
   5   5 -16   -0.08    0.79
   5   5 -16    2.01    1.48
  -5  -5 -16   -2.37    1.74
   5  -5 -16    0.00    0.79
   5  -5 -16    0.46    2.26
   5   5  17    3.68    2.68
  -5  -5  17    0.20    2.36
   5   5 -17   -0.13    0.95
  -5  -5 -17   -2.50    4.26
   5   5 -17    2.59    1.72
  -5   5 -17    1.30    2.41
   5  -5 -17    0.88    1.68
   5   6   0   -0.41    0.48
  -6   5   0    0.38    0.54
   6  -5   0    0.16    0.37
  -5  -6   0    0.42    0.50
  -6   5   0    0.18    0.43
   6  -5   0    0.08    0.39
  -5  -6   1   39.58    2.17
   6  -5   1   36.87    1.23
   5   6   1   38.60    1.73
   6  -5   1   38.40    1.58
  -6   5   1   37.51    1.62
  -6   5   1   38.57    1.02
  -5  -6  -1   37.39    1.76
   5   6  -1   37.01    1.47
  -6   5  -1   38.33    1.28
  -6   5  -1   37.98    1.43
   6  -5  -1   37.42    1.54
   6  -5  -1   38.04    1.14
   6  -5   2    0.12    0.64
  -5  -6   2    0.58    0.49
   5   6   2    0.67    0.67
  -6   5   2    0.51    0.62
  -5  -6  -2    0.78    1.12
   6  -5  -2    0.94    0.25
  -6   5  -2    0.32    0.58
   6  -5  -2    0.51    0.63
  -6   5  -2    1.24    0.56
  -5  -6   3  309.98    7.82
   5   6   3  315.97   10.14
  -6   5   3  296.79    8.67
   6  -5   3  318.35    9.34
  -5  -6  -3  303.39    8.76
   6  -5  -3  297.35    8.60
  -6   5  -3  294.38    8.48
   6  -5  -3  307.77    6.42
  -6   5  -3  300.84    7.23
   6  -5  -3  303.47    6.05
   5   6   4   33.08    1.93
  -5  -6   4   35.59    1.21
  -5  -6   4   33.93    1.52
   6  -5   4   32.67    2.12
  -6   5   4   31.54    2.01
  -5  -6  -4   34.89    2.06
  -6   5  -4   32.77    1.95
   6  -5  -4   32.56    0.62
   6  -5  -4   34.24    1.99
   6  -5  -4   28.98    0.73
  -5  -6   5  365.60   10.08
   6  -5   5  350.01   11.37
  -6   5   5  349.83   11.30
   5   6   5  352.04   10.78
  -5  -6   5  356.40    9.87
  -5  -6  -5  367.97   13.27
   6  -5  -5  339.69    7.35
  -6   5  -5  351.02   11.02
   6  -5  -5  341.95   10.81
   5   6   6   56.91    2.90
  -5  -6   6   59.29    1.97
  -5  -6   6   61.59    3.23
  -6   5   6   57.73    1.17
   6  -5   6   60.45    3.26
  -5  -6  -6   61.28    3.22
  -6   5  -6   59.29    3.02
   6  -5  -6   59.59    3.03
   6  -5  -6   56.54    1.29
  -5  -6   7   98.44    3.67
  -5  -6   7  106.45    4.05
   6  -5   7   99.20    4.87
   5   6   7  101.47    4.42
  -6   5   7   96.22    2.12
  -5  -6  -7  106.80    4.69
   6  -5  -7   95.52    4.39
   6  -5  -7   98.02    2.72
  -6   5  -7   97.53    4.45
   5   6   8   85.23    6.00
  -5  -6   8   94.08    3.85
  -5  -6   8   95.44    3.23
  -6   5   8   95.54    2.86
   6  -5   8   88.26    4.98
  -5  -6  -8   96.22    4.86
   5   6  -8   93.82    3.35
   5   6  -8   87.78    3.41
  -6   5  -8   89.06    4.50
   6  -5  -8   91.47    2.94
   6  -5  -8   90.65    4.46
  -5  -6   9    3.52    1.15
  -5  -6   9   -0.31    0.89
   6  -5   9    3.85    1.71
   5   6   9    3.23    1.47
  -6   5   9    2.94    0.82
  -5  -6  -9    1.04    2.51
   5   6  -9    4.27    0.93
   6  -5  -9    3.14    0.88
   6  -5  -9    3.98    1.53
   5   6  -9    3.04    0.69
  -6   5  -9    4.00    1.53
   5   6  10    1.83    1.33
  -5  -6  10    2.34    1.63
   6  -5  10    0.57    2.48
  -6   5  10    0.99    0.51
   5   6 -10    1.85    0.82
  -5  -6 -10    0.25    1.31
   5   6 -10    0.55    0.63
   6  -5 -10    1.47    0.52
   6  -5 -10    0.32    1.35
  -6   5 -10    0.04    2.10
  -5  -6  11    0.90    1.09
  -6   5  11    0.68    0.54
   6  -5  11    1.01    1.59
   5   6  11    2.24    1.31
   5   6 -11    1.05    1.30
  -5  -6 -11    1.85    1.27
   6  -5 -11    0.66    0.55
   6  -5 -11    0.93    1.33
  -6   5 -11    0.66    1.29
   5   6 -11    1.61    1.01
   5   6  12    0.41    1.28
  -5  -6  12    1.25    1.13
  -6   5  12    1.53    0.93
   6  -5  12    0.23    1.63
   5   6 -12   -0.17    1.37
  -5  -6 -12    1.79    1.30
   5   6 -12    0.98    0.67
   6  -5 -12   -0.20    1.33
   6  -5 -12    0.02    0.98
  -6   5 -12    0.92    1.29
   5   6  13    1.22    1.07
  -6   5  13    0.03    0.79
   6  -5  13   -2.10    1.30
  -5  -6  13   -1.17    1.01
   5   6 -13    0.68    1.15
   5   6 -13   -0.01    0.55
  -5  -6 -13   -1.30    1.89
  -6   5 -13    0.01    0.67
  -6   5 -13   -0.43    1.10
   6  -5 -13    0.21    1.12
   6  -5 -13    0.08    0.52
  -5  -6  14    2.83    1.23
   5   6  14    2.02    2.12
  -6   5  14    0.04    0.65
   6  -5  14    1.00    1.66
  -5  -6 -14    1.47    1.29
   5   6 -14   -0.07    0.71
  -6   5 -14   -0.05    0.85
   6  -5 -14   -0.08    1.03
  -6   5 -14    1.09    2.18
   6  -5 -14    0.90    2.22
   5   6 -14   -0.15    1.45
   6  -5  15   -1.67    1.62
   5   6  15    1.06    2.05
  -6   5  15   -0.28    0.68
  -5  -6  15    3.92    1.94
  -5  -6 -15    2.37    1.38
   5   6 -15   -0.02    1.11
   5   6 -15    1.24    1.45
  -6   5 -15   -0.03    1.30
  -6   5 -15    0.09    1.04
   6  -5 -15    0.39    1.38
   6  -5 -15   -0.02    0.65
   5   6  16    0.72    1.39
  -5  -6  16   -0.97    2.22
   6  -5  16   -1.28    1.72
  -5  -6 -16    5.54    2.95
   5   6 -16    0.13    1.17
  -6   5 -16   -0.01    0.87
  -6   5 -16    0.20    1.17
   6  -5 -16    3.34    1.50
   5   6 -16    0.33    1.00
   6  -5 -16   -0.10    0.72
   5   7   0  513.46   13.81
  -7   5   0  522.49   13.79
  -7   5   0  501.44   12.62
  -5  -7   0  517.36   13.91
   7  -5   0  510.46   13.30
   7  -5   0  530.42   13.80
   5   7   1   30.27    1.59
  -5  -7   1   29.51    1.39
   7  -5   1   28.60    1.41
  -7   5   1   28.72    2.17
  -7   5   1   28.71    0.89
  -5  -7  -1   29.50    1.56
   7  -5  -1   28.97    2.02
  -7   5  -1   29.84    1.88
   7  -5  -1   27.94    0.99
  -7   5  -1   28.85    1.20
   5   7   2  137.19    4.13
  -7   5   2  127.66    5.16
  -5  -7   2  123.89    3.46
   7  -5   2  128.93    4.05
  -5  -7  -2  130.03    4.16
  -7   5  -2  132.16    3.23
  -7   5  -2  130.61    3.88
   7  -5  -2  127.93    3.90
   7  -5  -2  134.19    3.16
   5   7   3   47.17    3.23
  -5  -7   3   46.81    1.76
  -7   5   3   47.29    3.34
   7  -5   3   47.19    2.33
  -5  -7  -3   44.65    2.23
   7  -5  -3   46.70    2.19
  -7   5  -3   47.59    2.11
   7  -5  -3   44.38    0.90
  -7   5  -3   45.77    1.81
   7  -5  -3   44.11    0.89
   5   7   4    1.47    1.47
  -5  -7   4    2.22    0.46
  -5  -7   4    2.69    0.75
   7  -5   4    0.65    1.64
  -7   5   4    2.86    1.58
   7  -5  -4    2.22    0.17
  -5  -7  -4    2.75    1.00
   7  -5  -4    1.18    0.92
  -7   5  -4    3.35    0.90
  -5  -7   5   45.74    2.86
   7  -5   5   45.63    2.80
  -7   5   5   44.27    2.63
  -5  -7   5   47.00    1.52
   5   7   5   46.58    2.42
   7  -5  -5   44.42    2.51
  -5  -7  -5   47.23    2.60
  -7   5  -5   44.64    2.51
   7  -5  -5   44.08    0.69
   5   7   6    2.63    1.17
  -5  -7   6    3.30    0.60
  -5  -7   6    2.08    0.91
   7  -5   6    4.16    1.39
  -7   5   6    2.94    1.31
  -5  -7  -6    2.53    1.21
  -7   5  -6    2.62    1.17
   7  -5  -6    1.97    1.19
   5   7   7   76.70    3.72
  -5  -7   7   78.46    2.55
  -5  -7   7   75.41    3.18
   7  -5   7   76.80    4.26
  -7   5   7   75.60    1.68
  -5  -7  -7   83.93    4.24
  -7   5  -7   68.87    3.87
   7  -5  -7   72.14    3.80
   7  -5  -7   73.43    1.57
   5   7   8    0.92    1.88
  -5  -7   8   -0.19    1.52
  -5  -7   8    0.97    0.63
  -7   5   8    1.05    0.26
   7  -5   8    0.09    1.40
[truncated: 1,149,574 more chars]
