# Supplementary material
Source: MDPI journal article supplement (https://www.mdpi.com/2312-7481/7/7/105)
Supplement: s1 [file s1 › 2044111.cif]

data_2 
 
_audit_creation_method            SHELXL-2013
_chemical_name_systematic
;
 ?
;
_chemical_name_common             ?
_chemical_melting_point           ?
_chemical_formula_moiety          ?
_chemical_formula_sum
 'C68 H64 Mn3 N16 O16' 
_chemical_formula_weight          1526.17

loop_
 _atom_type_symbol
 _atom_type_description
 _atom_type_scat_dispersion_real
 _atom_type_scat_dispersion_imag
 _atom_type_scat_source
 'C'  'C'   0.0033   0.0016
 'International Tables Vol C Tables 4.2.6.8 and 6.1.1.4'
 'H'  'H'   0.0000   0.0000
 'International Tables Vol C Tables 4.2.6.8 and 6.1.1.4'
 'N'  'N'   0.0061   0.0033
 'International Tables Vol C Tables 4.2.6.8 and 6.1.1.4'
 'O'  'O'   0.0106   0.0060
 'International Tables Vol C Tables 4.2.6.8 and 6.1.1.4'
 'Mn'  'Mn'   0.3368   0.7283
 'International Tables Vol C Tables 4.2.6.8 and 6.1.1.4'
 
_space_group_crystal_system       triclinic
_space_group_IT_number            2
_space_group_name_H-M_alt         'P -1'
_space_group_name_Hall            '-P 1'
 
_shelx_space_group_comment
;
The symmetry employed for this shelxl refinement is uniquely defined
by the following loop, which should always be used as a source of
symmetry information in preference to the above space-group names.
They are only intended as comments.
;
 
loop_
 _space_group_symop_operation_xyz
 'x, y, z'
 '-x, -y, -z'
 
_cell_length_a                    9.2247(6)
_cell_length_b                    13.2300(7)
_cell_length_c                    14.2577(8)
_cell_angle_alpha                 82.3377(15)
_cell_angle_beta                  79.666(2)
_cell_angle_gamma                 85.466(2)
_cell_volume                      1693.83(17)
_cell_formula_units_Z             1
_cell_measurement_temperature     293(2)
_cell_measurement_reflns_used     10523 
_cell_measurement_theta_min       3.08
_cell_measurement_theta_max       27.50 
 
_exptl_crystal_description        trip 
_exptl_crystal_colour             'dark red' 
_exptl_crystal_density_meas       ? 
_exptl_crystal_density_method     ?              
_exptl_crystal_density_diffrn     1.496          
_exptl_crystal_F_000              787
_exptl_transmission_factor_min    ?                                             
_exptl_transmission_factor_max    ?                                             
_exptl_crystal_size_max           0.54
_exptl_crystal_size_mid           0.18 
_exptl_crystal_size_min           0.10 
_exptl_absorpt_coefficient_mu     0.633
_shelx_estimated_absorpt_T_min    ? 
_shelx_estimated_absorpt_T_max    ? 
_exptl_absorpt_correction_type    Empirical 
_exptl_absorpt_correction_T_min   0.0572 
_exptl_absorpt_correction_T_max   1.0000 
_exptl_absorpt_process_details    '(ABSCOR; Higashi, 1995)' 
 
_exptl_special_details
;
 ?
;
 
_diffrn_ambient_temperature       293(2)
_diffrn_radiation_wavelength      0.71073
_diffrn_radiation_type            MoK\a
_diffrn_source                    'fine-focus sealed tube'                      
_diffrn_measurement_device_type   'Rigaku R-AXIS-RAPID' 
_diffrn_measurement_method        \w
_diffrn_detector_area_resol_mean  10.00 
_diffrn_reflns_number             16752
_diffrn_reflns_av_unetI/netI      0.0674
_diffrn_reflns_av_R_equivalents   0.0467
_diffrn_reflns_limit_h_min        -11
_diffrn_reflns_limit_h_max        11
_diffrn_reflns_limit_k_min        -17
_diffrn_reflns_limit_k_max        17
_diffrn_reflns_limit_l_min        -18
_diffrn_reflns_limit_l_max        18
_diffrn_reflns_theta_min          3.073
_diffrn_reflns_theta_max          27.483
_diffrn_reflns_theta_full         25.242
_diffrn_measured_fraction_theta_max   0.987
_diffrn_measured_fraction_theta_full  0.996
_diffrn_reflns_Laue_measured_fraction_max    0.987
_diffrn_reflns_Laue_measured_fraction_full   0.996
_diffrn_reflns_point_group_measured_fraction_max   0.987
_diffrn_reflns_point_group_measured_fraction_full  0.996
_reflns_number_total              7655
_reflns_number_gt                 4597
_reflns_threshold_expression      'I > 2\s(I)'
_reflns_Friedel_coverage          0.000
_reflns_Friedel_fraction_max      .
_reflns_Friedel_fraction_full     .
 
_reflns_special_details
;
 Reflections were merged by SHELXL according to the crystal
 class for the calculation of statistics and refinement.
 
 _reflns_Friedel_fraction is defined as the number of unique
 Friedel pairs measured divided by the number that would be
 possible theoretically, ignoring centric projections and
 systematic absences.
;
 
_computing_data_collection        'crystalstructure 3.6.0 (Rigaku/MSC, 2004)'
_computing_cell_refinement        'crystalstructure 3.6.0 (Rigaku/MSC, 2004)'
_computing_data_reduction         'Crystalstructure 2004' 
_computing_structure_solution     'SHELXL-2013 (Sheldrick, 2013)'
_computing_structure_refinement   'SHELXL-2013 (Sheldrick, 2013)'
_computing_molecular_graphics     ?
_computing_publication_material   ?
 
_refine_special_details
;
 ?
;
_refine_ls_structure_factor_coef  Fsqd
_refine_ls_matrix_type            full
_refine_ls_weighting_scheme       calc
_refine_ls_weighting_details
;
 w=1/[\s^2^(Fo^2^)+(0.0503P)^2^+2.0546P]
 where P=(Fo^2^+2Fc^2^)/3
;
_atom_sites_solution_primary      ?
_atom_sites_solution_secondary    ?
_atom_sites_solution_hydrogens    geom
_refine_ls_hydrogen_treatment     constr
_refine_ls_extinction_method      SHELXL
_refine_ls_extinction_coef        0.0045(9)
_refine_ls_extinction_expression
 'Fc^*^=kFc[1+0.001xFc^2^\l^3^/sin(2\q)]^-1/4^'
_refine_ls_number_reflns          7655
_refine_ls_number_parameters      467
_refine_ls_number_restraints      0
_refine_ls_R_factor_all           0.0984
_refine_ls_R_factor_gt            0.0485
_refine_ls_wR_factor_ref          0.1631
_refine_ls_wR_factor_gt           0.1037
_refine_ls_goodness_of_fit_ref    1.153
_refine_ls_restrained_S_all       1.153
_refine_ls_shift/su_max           0.000
_refine_ls_shift/su_mean          0.000
 
loop_
 _atom_site_label
 _atom_site_type_symbol
 _atom_site_fract_x
 _atom_site_fract_y
 _atom_site_fract_z
 _atom_site_U_iso_or_equiv
 _atom_site_adp_type
 _atom_site_occupancy
 _atom_site_site_symmetry_order  
 _atom_site_calc_flag
 _atom_site_refinement_flags_posn
 _atom_site_refinement_flags_adp
 _atom_site_refinement_flags_occupancy
 _atom_site_disorder_assembly
 _atom_site_disorder_group
Mn1 Mn 0.05060(6) 0.13152(4) -0.26523(4) 0.03079(17) Uani 1 1 d . . . . .
Mn2 Mn -0.5000 0.0000 0.0000 0.0303(2) Uani 1 2 d S . P . .
C1 C -0.1988(4) 0.0071(3) -0.1719(3) 0.0355(8) Uani 1 1 d . . . . .
C2 C -0.1438(4) -0.0774(3) -0.2311(3) 0.0346(8) Uani 1 1 d . . . . .
C3 C -0.2219(5) -0.1667(3) -0.2095(3) 0.0438(10) Uani 1 1 d . . . . .
H3A H -0.3038 -0.1694 -0.1607 0.053 Uiso 1 1 calc R U . . .
C4 C -0.1812(5) -0.2502(3) -0.2580(3) 0.0546(12) Uani 1 1 d . . . . .
H4A H -0.2334 -0.3091 -0.2411 0.065 Uiso 1 1 calc R U . . .
C5 C -0.0632(5) -0.2460(3) -0.3313(4) 0.0571(13) Uani 1 1 d . . . . .
H5A H -0.0356 -0.3023 -0.3645 0.069 Uiso 1 1 calc R U . . .
C6 C 0.0155(5) -0.1591(3) -0.3569(3) 0.0443(10) Uani 1 1 d . . . . .
H6A H 0.0944 -0.1568 -0.4077 0.053 Uiso 1 1 calc R U . . .
C7 C -0.0229(4) -0.0748(3) -0.3067(3) 0.0338(8) Uani 1 1 d . . . . .
C8 C 0.2409(4) 0.0933(3) -0.4348(3) 0.0317(8) Uani 1 1 d . . . . .
C9 C 0.3515(4) 0.0985(3) -0.5229(3) 0.0367(9) Uani 1 1 d . . . . .
C10 C 0.3573(5) 0.0234(3) -0.5827(3) 0.0441(10) Uani 1 1 d . . . . .
H10A H 0.2885 -0.0265 -0.5677 0.053 Uiso 1 1 calc R U . . .
C11 C 0.4638(5) 0.0212(4) -0.6647(3) 0.0515(11) Uani 1 1 d . . . . .
H11A H 0.4669 -0.0300 -0.7038 0.062 Uiso 1 1 calc R U . . .
C12 C 0.5650(5) 0.0956(4) -0.6875(3) 0.0589(13) Uani 1 1 d . . . . .
H12A H 0.6368 0.0947 -0.7424 0.071 Uiso 1 1 calc R U . . .
C13 C 0.5601(5) 0.1706(4) -0.6298(3) 0.0593(13) Uani 1 1 d . . . . .
H13A H 0.6288 0.2205 -0.6460 0.071 Uiso 1 1 calc R U . . .
C14 C 0.4550(5) 0.1739(3) -0.5478(3) 0.0493(11) Uani 1 1 d . . . . .
H14A H 0.4529 0.2257 -0.5094 0.059 Uiso 1 1 calc R U . . .
C15 C 0.2490(4) 0.1266(3) -0.1254(3) 0.0368(9) Uani 1 1 d . . . . .
C16 C 0.2086(4) 0.2367(3) -0.1106(3) 0.0334(8) Uani 1 1 d . . . . .
C17 C 0.2729(5) 0.2757(3) -0.0426(3) 0.0446(10) Uani 1 1 d . . . . .
H17A H 0.3380 0.2332 -0.0103 0.054 Uiso 1 1 calc R U . . .
C18 C 0.2440(5) 0.3747(3) -0.0214(3) 0.0532(11) Uani 1 1 d . . . . .
H18A H 0.2884 0.3985 0.0245 0.064 Uiso 1 1 calc R U . . .
C19 C 0.1481(5) 0.4377(3) -0.0693(3) 0.0494(11) Uani 1 1 d . . . . .
H19A H 0.1268 0.5044 -0.0551 0.059 Uiso 1 1 calc R U . . .
C20 C 0.0829(5) 0.4034(3) -0.1383(3) 0.0428(10) Uani 1 1 d . . . . .
H20A H 0.0197 0.4473 -0.1709 0.051 Uiso 1 1 calc R U . . .
C21 C 0.1117(4) 0.3026(3) -0.1592(3) 0.0331(8) Uani 1 1 d . . . . .
C22 C -0.0774(4) 0.3097(3) -0.3541(3) 0.0341(8) Uani 1 1 d . . . . .
C23 C -0.1527(4) 0.3862(3) -0.4168(3) 0.0348(8) Uani 1 1 d . . . . .
C24 C -0.1500(5) 0.4886(3) -0.4065(3) 0.0519(11) Uani 1 1 d . . . . .
H24A H -0.1024 0.5074 -0.3598 0.062 Uiso 1 1 calc R U . . .
C25 C -0.2170(5) 0.5630(3) -0.4644(4) 0.0591(13) Uani 1 1 d . . . . .
H25A H -0.2150 0.6313 -0.4560 0.071 Uiso 1 1 calc R U . . .
C26 C -0.2862(6) 0.5368(4) -0.5338(4) 0.0649(14) Uani 1 1 d . . . . .
H26A H -0.3298 0.5871 -0.5736 0.078 Uiso 1 1 calc R U . . .
C27 C -0.2907(7) 0.4364(4) -0.5444(4) 0.0694(15) Uani 1 1 d . . . . .
H27A H -0.3391 0.4186 -0.5912 0.083 Uiso 1 1 calc R U . . .
C28 C -0.2244(6) 0.3599(3) -0.4867(3) 0.0555(12) Uani 1 1 d . . . . .
H28A H -0.2282 0.2917 -0.4950 0.067 Uiso 1 1 calc R U . . .
C29 C -0.6926(5) -0.1531(3) -0.0483(3) 0.0403(9) Uani 1 1 d . . . . .
H29A H -0.7647 -0.1022 -0.0321 0.048 Uiso 1 1 calc R U . . .
C30 C -0.8844(6) -0.2407(4) -0.0936(5) 0.0775(17) Uani 1 1 d . . . . .
H30A H -0.9433 -0.1822 -0.0726 0.116 Uiso 1 1 calc R U . . .
H30B H -0.9228 -0.3017 -0.0563 0.116 Uiso 1 1 calc R U . . .
H30C H -0.8870 -0.2435 -0.1602 0.116 Uiso 1 1 calc R U . . .
C31 C -0.6244(6) -0.3144(4) -0.1089(4) 0.0662(14) Uani 1 1 d . . . . .
H31A H -0.5293 -0.2992 -0.0977 0.099 Uiso 1 1 calc R U . . .
H31B H -0.6193 -0.3201 -0.1759 0.099 Uiso 1 1 calc R U . . .
H31C H -0.6533 -0.3778 -0.0716 0.099 Uiso 1 1 calc R U . . .
C32 C 0.6724(8) 0.3963(7) -0.1537(5) 0.102(2) Uani 1 1 d . . . . .
H32A H 0.7279 0.3439 -0.1241 0.122 Uiso 1 1 calc R U . . .
C33 C 0.4987(7) 0.4451(5) -0.2587(5) 0.096(2) Uani 1 1 d . . . . .
H33A H 0.5091 0.5113 -0.2410 0.145 Uiso 1 1 calc R U . . .
H33B H 0.3975 0.4278 -0.2408 0.145 Uiso 1 1 calc R U . . .
H33C H 0.5283 0.4460 -0.3269 0.145 Uiso 1 1 calc R U . . .
C34 C 0.5837(7) 0.2668(4) -0.2303(5) 0.096(2) Uani 1 1 d . . . . .
H34A H 0.6475 0.2226 -0.1946 0.144 Uiso 1 1 calc R U . . .
H34B H 0.6155 0.2632 -0.2977 0.144 Uiso 1 1 calc R U . . .
H34C H 0.4844 0.2458 -0.2117 0.144 Uiso 1 1 calc R U . . .
N1 N 0.0625(3) 0.0134(2) -0.3322(2) 0.0302(6) Uani 1 1 d . . . . .
N2 N 0.1521(3) 0.0149(2) -0.4142(2) 0.0350(7) Uani 1 1 d . . . . .
N3 N 0.2213(3) 0.1585(2) -0.3657(2) 0.0339(7) Uani 1 1 d . . . . .
N4 N 0.0471(3) 0.2688(2) -0.2318(2) 0.0308(7) Uani 1 1 d . . . . .
N5 N -0.0124(3) 0.3418(2) -0.2872(2) 0.0351(7) Uani 1 1 d . . . . .
N6 N -0.0696(3) 0.2061(2) -0.3543(2) 0.0349(7) Uani 1 1 d . . . . .
N7 N -0.7323(4) -0.2329(3) -0.0810(3) 0.0454(8) Uani 1 1 d . . . . .
N8 N 0.5894(4) 0.3710(3) -0.2105(3) 0.0567(10) Uani 1 1 d . . . . .
O1 O -0.1244(3) 0.08594(19) -0.17774(18) 0.0403(6) Uani 1 1 d . . . . .
O2 O -0.3166(3) -0.0007(2) -0.1169(2) 0.0561(8) Uani 1 1 d . . . . .
O3 O 0.3077(3) 0.2287(2) -0.3679(2) 0.0518(8) Uani 1 1 d . . . . .
O4 O 0.3513(3) 0.0822(2) -0.0886(2) 0.0526(8) Uani 1 1 d . . . . .
O5 O 0.1774(3) 0.08038(19) -0.17360(19) 0.0399(6) Uani 1 1 d . . . . .
O6 O -0.1365(3) 0.1635(2) -0.4064(2) 0.0506(8) Uani 1 1 d . . . . .
O7 O -0.5645(3) -0.14133(19) -0.0376(2) 0.0434(7) Uani 1 1 d . . . . .
O8 O 0.6838(8) 0.4816(6) -0.1361(5) 0.180(3) Uani 1 1 d . . . . .
 
loop_
 _atom_site_aniso_label
 _atom_site_aniso_U_11
 _atom_site_aniso_U_22
 _atom_site_aniso_U_33
 _atom_site_aniso_U_23
 _atom_site_aniso_U_13
 _atom_site_aniso_U_12
Mn1 0.0304(3) 0.0289(3) 0.0331(3) -0.0060(2) -0.0049(2) 0.0003(2)
Mn2 0.0266(4) 0.0298(4) 0.0339(4) -0.0055(3) -0.0030(3) 0.0001(3)
C1 0.036(2) 0.038(2) 0.0303(18) -0.0001(16) -0.0015(16) -0.0044(16)
C2 0.027(2) 0.037(2) 0.038(2) -0.0040(16) -0.0034(15) 0.0000(15)
C3 0.042(2) 0.042(2) 0.046(2) -0.0057(19) 0.0005(18) -0.0110(18)
C4 0.054(3) 0.042(2) 0.065(3) -0.007(2) 0.003(2) -0.020(2)
C5 0.061(3) 0.040(2) 0.072(3) -0.021(2) 0.001(3) -0.012(2)
C6 0.041(2) 0.042(2) 0.051(2) -0.0166(19) 0.0038(19) -0.0090(18)
C7 0.033(2) 0.0281(18) 0.039(2) -0.0030(16) -0.0034(16) -0.0033(15)
C8 0.028(2) 0.0311(18) 0.0354(19) -0.0046(15) -0.0027(15) -0.0002(14)
C9 0.029(2) 0.041(2) 0.038(2) 0.0015(17) -0.0064(16) 0.0055(16)
C10 0.044(3) 0.051(2) 0.036(2) -0.0045(19) -0.0012(18) -0.0026(19)
C11 0.046(3) 0.070(3) 0.037(2) -0.009(2) -0.0029(19) 0.003(2)
C12 0.038(3) 0.088(4) 0.041(2) 0.008(2) 0.0059(19) 0.002(2)
C13 0.053(3) 0.066(3) 0.053(3) -0.001(2) 0.008(2) -0.013(2)
C14 0.044(3) 0.049(2) 0.051(2) -0.005(2) 0.005(2) -0.0114(19)
C15 0.034(2) 0.038(2) 0.036(2) 0.0015(17) -0.0064(16) -0.0005(16)
C16 0.032(2) 0.0345(19) 0.0326(19) -0.0054(16) -0.0030(15) 0.0000(15)
C17 0.041(2) 0.054(3) 0.043(2) -0.0140(19) -0.0150(19) 0.0027(19)
C18 0.051(3) 0.058(3) 0.056(3) -0.021(2) -0.013(2) 0.000(2)
C19 0.050(3) 0.043(2) 0.061(3) -0.027(2) -0.012(2) -0.0015(19)
C20 0.039(2) 0.039(2) 0.053(2) -0.0141(19) -0.0104(19) 0.0033(17)
C21 0.032(2) 0.0346(19) 0.0331(19) -0.0095(16) -0.0015(15) -0.0013(15)
C22 0.030(2) 0.036(2) 0.0351(19) -0.0046(16) -0.0009(15) -0.0006(15)
C23 0.029(2) 0.039(2) 0.037(2) -0.0025(17) -0.0091(16) 0.0018(15)
C24 0.052(3) 0.040(2) 0.068(3) 0.001(2) -0.028(2) -0.0050(19)
C25 0.063(3) 0.036(2) 0.082(3) 0.005(2) -0.032(3) -0.001(2)
C26 0.071(4) 0.056(3) 0.069(3) 0.012(3) -0.033(3) 0.004(2)
C27 0.098(4) 0.055(3) 0.065(3) -0.006(3) -0.048(3) 0.014(3)
C28 0.069(3) 0.046(3) 0.055(3) -0.008(2) -0.027(2) 0.010(2)
C29 0.037(2) 0.038(2) 0.048(2) -0.0092(18) -0.0102(18) -0.0023(17)
C30 0.052(3) 0.085(4) 0.106(5) -0.010(3) -0.032(3) -0.025(3)
C31 0.069(4) 0.052(3) 0.083(4) -0.031(3) -0.007(3) -0.010(2)
C32 0.072(5) 0.178(8) 0.059(4) -0.034(4) -0.003(3) -0.017(5)
C33 0.074(4) 0.115(5) 0.091(5) -0.006(4) -0.007(4) 0.026(4)
C34 0.074(4) 0.069(4) 0.129(6) -0.023(4) 0.038(4) -0.018(3)
N1 0.0251(16) 0.0316(15) 0.0329(16) -0.0053(13) -0.0013(12) -0.0017(12)
N2 0.0308(18) 0.0357(17) 0.0359(16) -0.0031(14) -0.0002(13) -0.0015(13)
N3 0.0307(17) 0.0321(16) 0.0394(17) -0.0030(14) -0.0094(13) 0.0006(13)
N4 0.0304(17) 0.0337(16) 0.0316(15) -0.0078(13) -0.0132(13) 0.0017(12)
N5 0.0342(18) 0.0351(17) 0.0351(16) -0.0033(14) -0.0068(14) 0.0032(13)
N6 0.0356(18) 0.0345(16) 0.0342(16) -0.0061(13) -0.0050(14) 0.0009(13)
N7 0.044(2) 0.0445(19) 0.051(2) -0.0085(16) -0.0096(16) -0.0130(16)
N8 0.048(2) 0.066(3) 0.055(2) -0.007(2) -0.0060(19) 0.0020(19)
O1 0.0419(16) 0.0391(15) 0.0385(15) -0.0111(12) 0.0026(12) -0.0042(12)
O2 0.0406(18) 0.068(2) 0.0537(18) -0.0195(15) 0.0210(14) -0.0136(15)
O3 0.0436(18) 0.0474(17) 0.0649(19) -0.0151(15) 0.0046(15) -0.0233(14)
O4 0.054(2) 0.0451(17) 0.066(2) -0.0065(15) -0.0355(16) 0.0075(14)
O5 0.0481(17) 0.0334(14) 0.0438(15) -0.0087(12) -0.0203(13) -0.0012(12)
O6 0.062(2) 0.0425(16) 0.0584(18) -0.0155(14) -0.0323(16) -0.0037(14)
O7 0.0365(16) 0.0347(14) 0.0622(18) -0.0117(13) -0.0114(13) -0.0042(11)
O8 0.158(6) 0.247(8) 0.167(6) -0.143(6) 0.002(5) -0.073(6)
 
_geom_special_details
;
 All esds (except the esd in the dihedral angle between two l.s. planes)
 are estimated using the full covariance matrix.  The cell esds are taken
 into account individually in the estimation of esds in distances, angles
 and torsion angles; correlations between esds in cell parameters are only
 used when they are defined by crystal symmetry.  An approximate (isotropic)
 treatment of cell esds is used for estimating esds involving l.s. planes.
;
 
loop_
 _geom_bond_atom_site_label_1
 _geom_bond_atom_site_label_2
 _geom_bond_distance
 _geom_bond_site_symmetry_2
 _geom_bond_publ_flag
Mn1 N1 1.924(3) . ?
Mn1 O5 1.929(3) . ?
Mn1 N4 1.934(3) . ?
Mn1 O1 1.939(3) . ?
Mn1 N3 1.950(3) . ?
Mn1 N6 1.953(3) . ?
Mn2 O2 2.151(3) . ?
Mn2 O2 2.151(3) 2_455 ?
Mn2 O4 2.162(3) 2 ?
Mn2 O4 2.162(3) 1_455 ?
Mn2 O7 2.167(3) . ?
Mn2 O7 2.167(3) 2_455 ?
C1 O2 1.224(4) . ?
C1 O1 1.279(4) . ?
C1 C2 1.492(5) . ?
C2 C3 1.403(5) . ?
C2 C7 1.405(5) . ?
C3 C4 1.373(6) . ?
C3 H3A 0.9300 . ?
C4 C5 1.366(6) . ?
C4 H4A 0.9300 . ?
C5 C6 1.381(5) . ?
C5 H5A 0.9300 . ?
C6 C7 1.392(5) . ?
C6 H6A 0.9300 . ?
C7 N1 1.429(4) . ?
C8 N2 1.342(4) . ?
C8 N3 1.373(5) . ?
C8 C9 1.467(5) . ?
C9 C10 1.385(6) . ?
C9 C14 1.402(5) . ?
C10 C11 1.387(5) . ?
C10 H10A 0.9300 . ?
C11 C12 1.377(7) . ?
C11 H11A 0.9300 . ?
C12 C13 1.364(7) . ?
C12 H12A 0.9300 . ?
C13 C14 1.382(6) . ?
C13 H13A 0.9300 . ?
C14 H14A 0.9300 . ?
C15 O4 1.233(4) . ?
C15 O5 1.274(5) . ?
C15 C16 1.508(5) . ?
C16 C17 1.396(5) . ?
C16 C21 1.406(5) . ?
C17 C18 1.378(6) . ?
C17 H17A 0.9300 . ?
C18 C19 1.376(6) . ?
C18 H18A 0.9300 . ?
C19 C20 1.382(6) . ?
C19 H19A 0.9300 . ?
C20 C21 1.399(5) . ?
C20 H20A 0.9300 . ?
C21 N4 1.419(5) . ?
C22 N5 1.343(5) . ?
C22 N6 1.368(5) . ?
C22 C23 1.476(5) . ?
C23 C28 1.384(6) . ?
C23 C24 1.385(6) . ?
C24 C25 1.379(6) . ?
C24 H24A 0.9300 . ?
C25 C26 1.364(7) . ?
C25 H25A 0.9300 . ?
C26 C27 1.361(7) . ?
C26 H26A 0.9300 . ?
C27 C28 1.392(6) . ?
C27 H27A 0.9300 . ?
C28 H28A 0.9300 . ?
C29 O7 1.242(5) . ?
C29 N7 1.311(5) . ?
C29 H29A 0.9300 . ?
C30 N7 1.460(6) . ?
C30 H30A 0.9600 . ?
C30 H30B 0.9600 . ?
C30 H30C 0.9600 . ?
C31 N7 1.455(6) . ?
C31 H31A 0.9600 . ?
C31 H31B 0.9600 . ?
C31 H31C 0.9600 . ?
C32 O8 1.205(9) . ?
C32 N8 1.299(8) . ?
C32 H32A 0.9300 . ?
C33 N8 1.425(7) . ?
C33 H33A 0.9600 . ?
C33 H33B 0.9600 . ?
C33 H33C 0.9600 . ?
C34 N8 1.450(7) . ?
C34 H34A 0.9600 . ?
C34 H34B 0.9600 . ?
C34 H34C 0.9600 . ?
N1 N2 1.304(4) . ?
N3 O3 1.264(4) . ?
N4 N5 1.314(4) . ?
N6 O6 1.257(4) . ?
O4 Mn2 2.162(3) 1_655 ?
 
loop_
 _geom_angle_atom_site_label_1
 _geom_angle_atom_site_label_2
 _geom_angle_atom_site_label_3
 _geom_angle
 _geom_angle_site_symmetry_1
 _geom_angle_site_symmetry_3
 _geom_angle_publ_flag
N1 Mn1 O5 98.89(12) . . ?
N1 Mn1 N4 164.92(12) . . ?
O5 Mn1 N4 91.66(11) . . ?
N1 Mn1 O1 91.74(11) . . ?
O5 Mn1 O1 92.36(12) . . ?
N4 Mn1 O1 98.60(12) . . ?
N1 Mn1 N3 78.54(12) . . ?
O5 Mn1 N3 90.97(12) . . ?
N4 Mn1 N3 90.61(13) . . ?
O1 Mn1 N3 170.11(12) . . ?
N1 Mn1 N6 90.01(13) . . ?
O5 Mn1 N6 170.33(12) . . ?
N4 Mn1 N6 78.90(12) . . ?
O1 Mn1 N6 91.14(12) . . ?
N3 Mn1 N6 87.06(13) . . ?
O2 Mn2 O2 180.0 . 2_455 ?
O2 Mn2 O4 86.39(13) . 2 ?
O2 Mn2 O4 93.61(13) 2_455 2 ?
O2 Mn2 O4 93.61(13) . 1_455 ?
O2 Mn2 O4 86.39(13) 2_455 1_455 ?
O4 Mn2 O4 180.0(2) 2 1_455 ?
O2 Mn2 O7 88.96(11) . . ?
O2 Mn2 O7 91.04(11) 2_455 . ?
O4 Mn2 O7 91.41(11) 2 . ?
O4 Mn2 O7 88.59(11) 1_455 . ?
O2 Mn2 O7 91.04(11) . 2_455 ?
O2 Mn2 O7 88.96(11) 2_455 2_455 ?
O4 Mn2 O7 88.58(11) 2 2_455 ?
O4 Mn2 O7 91.42(11) 1_455 2_455 ?
O7 Mn2 O7 180.0 . 2_455 ?
O2 C1 O1 120.3(4) . . ?
O2 C1 C2 118.7(3) . . ?
O1 C1 C2 121.0(3) . . ?
C3 C2 C7 117.5(4) . . ?
C3 C2 C1 116.5(3) . . ?
C7 C2 C1 126.0(3) . . ?
C4 C3 C2 122.1(4) . . ?
C4 C3 H3A 119.0 . . ?
C2 C3 H3A 119.0 . . ?
C5 C4 C3 119.4(4) . . ?
C5 C4 H4A 120.3 . . ?
C3 C4 H4A 120.3 . . ?
C4 C5 C6 120.8(4) . . ?
C4 C5 H5A 119.6 . . ?
C6 C5 H5A 119.6 . . ?
C5 C6 C7 120.2(4) . . ?
C5 C6 H6A 119.9 . . ?
C7 C6 H6A 119.9 . . ?
C6 C7 C2 119.9(3) . . ?
C6 C7 N1 119.5(3) . . ?
C2 C7 N1 120.5(3) . . ?
N2 C8 N3 114.2(3) . . ?
N2 C8 C9 118.8(3) . . ?
N3 C8 C9 126.9(3) . . ?
C10 C9 C14 118.4(4) . . ?
C10 C9 C8 118.4(3) . . ?
C14 C9 C8 123.1(4) . . ?
C11 C10 C9 121.2(4) . . ?
C11 C10 H10A 119.4 . . ?
C9 C10 H10A 119.4 . . ?
C12 C11 C10 119.5(5) . . ?
C12 C11 H11A 120.3 . . ?
C10 C11 H11A 120.3 . . ?
C13 C12 C11 120.0(4) . . ?
C13 C12 H12A 120.0 . . ?
C11 C12 H12A 120.0 . . ?
C12 C13 C14 121.3(4) . . ?
C12 C13 H13A 119.3 . . ?
C14 C13 H13A 119.3 . . ?
C13 C14 C9 119.6(4) . . ?
C13 C14 H14A 120.2 . . ?
C9 C14 H14A 120.2 . . ?
O4 C15 O5 120.9(4) . . ?
O4 C15 C16 118.5(4) . . ?
O5 C15 C16 120.6(3) . . ?
C17 C16 C21 117.7(3) . . ?
C17 C16 C15 116.8(3) . . ?
C21 C16 C15 125.5(3) . . ?
C18 C17 C16 122.6(4) . . ?
C18 C17 H17A 118.7 . . ?
C16 C17 H17A 118.7 . . ?
C19 C18 C17 118.7(4) . . ?
C19 C18 H18A 120.7 . . ?
C17 C18 H18A 120.7 . . ?
C18 C19 C20 121.1(4) . . ?
C18 C19 H19A 119.5 . . ?
C20 C19 H19A 119.5 . . ?
C19 C20 C21 120.1(4) . . ?
C19 C20 H20A 119.9 . . ?
C21 C20 H20A 119.9 . . ?
C20 C21 C16 119.8(4) . . ?
C20 C21 N4 119.7(3) . . ?
C16 C21 N4 120.5(3) . . ?
N5 C22 N6 114.7(3) . . ?
N5 C22 C23 118.7(3) . . ?
N6 C22 C23 126.6(3) . . ?
C28 C23 C24 118.5(4) . . ?
C28 C23 C22 122.6(4) . . ?
C24 C23 C22 118.8(4) . . ?
C25 C24 C23 120.9(4) . . ?
C25 C24 H24A 119.5 . . ?
C23 C24 H24A 119.5 . . ?
C26 C25 C24 120.3(4) . . ?
C26 C25 H25A 119.8 . . ?
C24 C25 H25A 119.8 . . ?
C27 C26 C25 119.4(4) . . ?
C27 C26 H26A 120.3 . . ?
C25 C26 H26A 120.3 . . ?
C26 C27 C28 121.4(5) . . ?
C26 C27 H27A 119.3 . . ?
C28 C27 H27A 119.3 . . ?
C23 C28 C27 119.4(4) . . ?
C23 C28 H28A 120.3 . . ?
C27 C28 H28A 120.3 . . ?
O7 C29 N7 124.0(4) . . ?
O7 C29 H29A 118.0 . . ?
N7 C29 H29A 118.0 . . ?
N7 C30 H30A 109.5 . . ?
N7 C30 H30B 109.5 . . ?
H30A C30 H30B 109.5 . . ?
N7 C30 H30C 109.5 . . ?
H30A C30 H30C 109.5 . . ?
H30B C30 H30C 109.5 . . ?
N7 C31 H31A 109.5 . . ?
N7 C31 H31B 109.5 . . ?
H31A C31 H31B 109.5 . . ?
N7 C31 H31C 109.5 . . ?
H31A C31 H31C 109.5 . . ?
H31B C31 H31C 109.5 . . ?
O8 C32 N8 125.8(9) . . ?
O8 C32 H32A 117.1 . . ?
N8 C32 H32A 117.1 . . ?
N8 C33 H33A 109.5 . . ?
N8 C33 H33B 109.5 . . ?
H33A C33 H33B 109.5 . . ?
N8 C33 H33C 109.5 . . ?
H33A C33 H33C 109.5 . . ?
H33B C33 H33C 109.5 . . ?
N8 C34 H34A 109.5 . . ?
N8 C34 H34B 109.5 . . ?
H34A C34 H34B 109.5 . . ?
N8 C34 H34C 109.5 . . ?
H34A C34 H34C 109.5 . . ?
H34B C34 H34C 109.5 . . ?
N2 N1 C7 114.6(3) . . ?
N2 N1 Mn1 117.3(2) . . ?
C7 N1 Mn1 128.0(2) . . ?
N1 N2 C8 114.8(3) . . ?
O3 N3 C8 122.2(3) . . ?
O3 N3 Mn1 124.0(2) . . ?
C8 N3 Mn1 113.8(2) . . ?
N5 N4 C21 114.9(3) . . ?
N5 N4 Mn1 116.7(2) . . ?
C21 N4 Mn1 128.1(2) . . ?
N4 N5 C22 114.9(3) . . ?
O6 N6 C22 122.4(3) . . ?
O6 N6 Mn1 123.6(2) . . ?
C22 N6 Mn1 114.0(3) . . ?
C29 N7 C31 120.7(4) . . ?
C29 N7 C30 121.1(4) . . ?
C31 N7 C30 118.1(4) . . ?
C32 N8 C33 121.7(6) . . ?
C32 N8 C34 122.9(6) . . ?
C33 N8 C34 115.4(5) . . ?
C1 O1 Mn1 131.7(2) . . ?
C1 O2 Mn2 167.8(3) . . ?
C15 O4 Mn2 169.3(3) . 1_655 ?
C15 O5 Mn1 131.3(2) . . ?
C29 O7 Mn2 122.3(2) . . ?
 
_refine_diff_density_max    0.778
_refine_diff_density_min   -1.038
_refine_diff_density_rms    0.110

_shelxl_version_number 2013-2

_shelx_res_file
;
TITL 1 in P-1
CELL 0.71073   9.2247  13.2300  14.2577  82.3377  79.6663  85.4659
ZERR   1.00   0.0006   0.0007   0.0008   0.0015   0.0023   0.0022
LATT  1
SFAC C H N O MN
UNIT 68 64 16 16 3
acta
bond $h
omit 0 13 10
omit -11 -2 2
omit 5 10 11
omit 0 3 17
omit 7 -9 10
omit 5 10 12
omit -8 -1 8
omit 6 13 11
omit 6 11 10
omit -8 -2 9
omit 7 11 9
omit -4 13 9
omit -11 -4 1
omit -7 -1 11
omit -10 -4 4
omit -5 -14 2
omit -10 -7 2
omit -9 -5 5
omit 3 -7 14
omit -3 0 16
htab
L.S. 10
BOND
FMAP 2
PLAN 20
WGHT    0.050300    2.054600
EXTI    0.004470
FVAR       0.19728
MN1   5    0.050600    0.131521   -0.265234    11.00000    0.03037    0.02892 =
         0.03314   -0.00597   -0.00485    0.00033
MN2   5   -0.500000    0.000000    0.000000    10.50000    0.02659    0.02979 =
         0.03385   -0.00551   -0.00302    0.00006
C1    1   -0.198817    0.007072   -0.171877    11.00000    0.03624    0.03756 =
         0.03033   -0.00006   -0.00147   -0.00438
C2    1   -0.143796   -0.077379   -0.231115    11.00000    0.02675    0.03741 =
         0.03832   -0.00396   -0.00336    0.00004
C3    1   -0.221876   -0.166693   -0.209456    11.00000    0.04176    0.04193 =
         0.04621   -0.00572    0.00048   -0.01100
AFIX  43
H3A   2   -0.303796   -0.169433   -0.160692    11.00000   -1.20000
AFIX   0
C4    1   -0.181162   -0.250193   -0.257985    11.00000    0.05435    0.04246 =
         0.06474   -0.00667    0.00309   -0.01975
AFIX  43
H4A   2   -0.233392   -0.309084   -0.241070    11.00000   -1.20000
AFIX   0
C5    1   -0.063237   -0.245981   -0.331339    11.00000    0.06076    0.03982 =
         0.07151   -0.02056    0.00083   -0.01242
AFIX  43
H5A   2   -0.035621   -0.302332   -0.364493    11.00000   -1.20000
AFIX   0
C6    1    0.015472   -0.159078   -0.356869    11.00000    0.04052    0.04156 =
         0.05067   -0.01660    0.00377   -0.00903
AFIX  43
H6A   2    0.094372   -0.156833   -0.407736    11.00000   -1.20000
AFIX   0
C7    1   -0.022863   -0.074832   -0.306740    11.00000    0.03306    0.02809 =
         0.03912   -0.00303   -0.00337   -0.00335
C8    1    0.240903    0.093344   -0.434783    11.00000    0.02767    0.03106 =
         0.03541   -0.00458   -0.00269   -0.00022
C9    1    0.351527    0.098522   -0.522928    11.00000    0.02860    0.04115 =
         0.03764    0.00152   -0.00637    0.00555
C10   1    0.357292    0.023380   -0.582725    11.00000    0.04356    0.05079 =
         0.03560   -0.00455   -0.00123   -0.00263
AFIX  43
H10A  2    0.288457   -0.026530   -0.567653    11.00000   -1.20000
AFIX   0
C11   1    0.463833    0.021214   -0.664659    11.00000    0.04580    0.07019 =
         0.03655   -0.00850   -0.00290    0.00280
AFIX  43
H11A  2    0.466901   -0.030048   -0.703826    11.00000   -1.20000
AFIX   0
C12   1    0.565040    0.095597   -0.687536    11.00000    0.03759    0.08839 =
         0.04065    0.00824    0.00591    0.00236
AFIX  43
H12A  2    0.636799    0.094684   -0.742358    11.00000   -1.20000
AFIX   0
C13   1    0.560096    0.170591   -0.629849    11.00000    0.05282    0.06575 =
         0.05256   -0.00116    0.00838   -0.01284
AFIX  43
H13A  2    0.628833    0.220530   -0.646032    11.00000   -1.20000
AFIX   0
C14   1    0.454982    0.173854   -0.547828    11.00000    0.04404    0.04911 =
         0.05107   -0.00513    0.00518   -0.01144
AFIX  43
H14A  2    0.452901    0.225683   -0.509410    11.00000   -1.20000
AFIX   0
C15   1    0.248993    0.126611   -0.125357    11.00000    0.03433    0.03797 =
         0.03621    0.00146   -0.00636   -0.00047
C16   1    0.208605    0.236706   -0.110582    11.00000    0.03215    0.03451 =
         0.03261   -0.00541   -0.00304   -0.00003
C17   1    0.272949    0.275734   -0.042575    11.00000    0.04119    0.05407 =
         0.04282   -0.01404   -0.01496    0.00272
AFIX  43
H17A  2    0.337982    0.233234   -0.010272    11.00000   -1.20000
AFIX   0
C18   1    0.244004    0.374694   -0.021364    11.00000    0.05093    0.05835 =
         0.05554   -0.02147   -0.01321   -0.00013
AFIX  43
H18A  2    0.288406    0.398462    0.024471    11.00000   -1.20000
AFIX   0
C19   1    0.148096    0.437665   -0.069344    11.00000    0.05050    0.04274 =
         0.06148   -0.02685   -0.01198   -0.00154
AFIX  43
H19A  2    0.126821    0.504385   -0.055119    11.00000   -1.20000
AFIX   0
C20   1    0.082860    0.403351   -0.138345    11.00000    0.03859    0.03946 =
         0.05290   -0.01411   -0.01039    0.00332
AFIX  43
H20A  2    0.019708    0.447303   -0.170934    11.00000   -1.20000
AFIX   0
C21   1    0.111697    0.302575   -0.159238    11.00000    0.03163    0.03461 =
         0.03308   -0.00945   -0.00149   -0.00132
C22   1   -0.077405    0.309693   -0.354103    11.00000    0.02982    0.03556 =
         0.03513   -0.00456   -0.00088   -0.00059
C23   1   -0.152700    0.386188   -0.416848    11.00000    0.02902    0.03876 =
         0.03684   -0.00253   -0.00906    0.00179
C24   1   -0.150018    0.488571   -0.406472    11.00000    0.05226    0.03981 =
         0.06827    0.00140   -0.02772   -0.00498
AFIX  43
H24A  2   -0.102380    0.507435   -0.359793    11.00000   -1.20000
AFIX   0
C25   1   -0.216981    0.562969   -0.464368    11.00000    0.06329    0.03575 =
         0.08188    0.00472   -0.03198   -0.00051
AFIX  43
H25A  2   -0.214968    0.631339   -0.456012    11.00000   -1.20000
AFIX   0
C26   1   -0.286161    0.536801   -0.533836    11.00000    0.07136    0.05553 =
         0.06895    0.01200   -0.03273    0.00442
AFIX  43
H26A  2   -0.329823    0.587078   -0.573589    11.00000   -1.20000
AFIX   0
C27   1   -0.290681    0.436408   -0.544418    11.00000    0.09770    0.05500 =
         0.06470   -0.00602   -0.04766    0.01430
AFIX  43
H27A  2   -0.339082    0.418593   -0.591187    11.00000   -1.20000
AFIX   0
C28   1   -0.224380    0.359876   -0.486704    11.00000    0.06907    0.04619 =
         0.05542   -0.00780   -0.02656    0.01011
AFIX  43
H28A  2   -0.228206    0.291654   -0.495005    11.00000   -1.20000
AFIX   0
C29   1   -0.692597   -0.153095   -0.048261    11.00000    0.03742    0.03769 =
         0.04790   -0.00920   -0.01018   -0.00227
AFIX  43
H29A  2   -0.764741   -0.102201   -0.032095    11.00000   -1.20000
AFIX   0
C30   1   -0.884369   -0.240741   -0.093618    11.00000    0.05153    0.08466 =
         0.10633   -0.01032   -0.03167   -0.02538
AFIX  33
H30A  2   -0.943339   -0.182217   -0.072647    11.00000   -1.50000
H30B  2   -0.922820   -0.301660   -0.056301    11.00000   -1.50000
H30C  2   -0.886977   -0.243501   -0.160234    11.00000   -1.50000
AFIX   0
C31   1   -0.624377   -0.314436   -0.108927    11.00000    0.06897    0.05234 =
         0.08265   -0.03082   -0.00746   -0.01010
AFIX  33
H31A  2   -0.529307   -0.299249   -0.097729    11.00000   -1.50000
H31B  2   -0.619344   -0.320098   -0.175878    11.00000   -1.50000
H31C  2   -0.653278   -0.377774   -0.071636    11.00000   -1.50000
AFIX   0
C32   1    0.672392    0.396311   -0.153728    11.00000    0.07191    0.17821 =
         0.05925   -0.03379   -0.00344   -0.01720
AFIX  43
H32A  2    0.727930    0.343943   -0.124060    11.00000   -1.20000
AFIX   0
C33   1    0.498676    0.445086   -0.258711    11.00000    0.07379    0.11458 =
         0.09106   -0.00583   -0.00714    0.02641
AFIX  33
H33A  2    0.509109    0.511284   -0.240950    11.00000   -1.50000
H33B  2    0.397462    0.427843   -0.240789    11.00000   -1.50000
H33C  2    0.528335    0.446034   -0.326881    11.00000   -1.50000
AFIX   0
C34   1    0.583735    0.266828   -0.230313    11.00000    0.07358    0.06933 =
         0.12904   -0.02319    0.03805   -0.01844
AFIX  33
H34A  2    0.647540    0.222594   -0.194611    11.00000   -1.50000
H34B  2    0.615534    0.263170   -0.297741    11.00000   -1.50000
H34C  2    0.484377    0.245754   -0.211715    11.00000   -1.50000
AFIX   0
N1    3    0.062454    0.013369   -0.332211    11.00000    0.02508    0.03158 =
         0.03291   -0.00534   -0.00133   -0.00169
N2    3    0.152121    0.014878   -0.414150    11.00000    0.03084    0.03573 =
         0.03586   -0.00315   -0.00016   -0.00153
N3    3    0.221260    0.158542   -0.365709    11.00000    0.03072    0.03210 =
         0.03945   -0.00300   -0.00939    0.00064
N4    3    0.047130    0.268754   -0.231823    11.00000    0.03042    0.03366 =
         0.03162   -0.00779   -0.01317    0.00175
N5    3   -0.012414    0.341832   -0.287178    11.00000    0.03419    0.03512 =
         0.03507   -0.00329   -0.00676    0.00318
N6    3   -0.069610    0.206068   -0.354314    11.00000    0.03559    0.03453 =
         0.03423   -0.00614   -0.00495    0.00095
N7    3   -0.732253   -0.232901   -0.080953    11.00000    0.04389    0.04451 =
         0.05090   -0.00851   -0.00958   -0.01301
N8    3    0.589406    0.371011   -0.210481    11.00000    0.04781    0.06554 =
         0.05479   -0.00728   -0.00597    0.00197
O1    4   -0.124448    0.085944   -0.177744    11.00000    0.04192    0.03906 =
         0.03849   -0.01107    0.00263   -0.00424
O2    4   -0.316648   -0.000691   -0.116854    11.00000    0.04057    0.06823 =
         0.05367   -0.01952    0.02102   -0.01359
O3    4    0.307676    0.228684   -0.367948    11.00000    0.04362    0.04745 =
         0.06487   -0.01509    0.00460   -0.02329
O4    4    0.351335    0.082162   -0.088559    11.00000    0.05438    0.04509 =
         0.06591   -0.00646   -0.03549    0.00749
O5    4    0.177363    0.080382   -0.173597    11.00000    0.04812    0.03344 =
         0.04376   -0.00875   -0.02032   -0.00122
O6    4   -0.136536    0.163484   -0.406373    11.00000    0.06179    0.04247 =
         0.05838   -0.01551   -0.03226   -0.00366
O7    4   -0.564539   -0.141332   -0.037569    11.00000    0.03646    0.03470 =
         0.06220   -0.01169   -0.01136   -0.00424
O8    4    0.683755    0.481629   -0.136137    11.00000    0.15782    0.24710 =
         0.16738   -0.14323    0.00199   -0.07280

HKLF  4

REM  1 in P-1
REM R1 =  0.0485 for    4597 Fo > 4sig(Fo)  and  0.0984 for all    7655 data
REM    467 parameters refined using      0 restraints

END

WGHT      0.0511      2.0808

REM Instructions for potential hydrogen bonds
EQIV $1 -x, -y, -z-1
HTAB C6 O6_$1

REM Highest difference peak  0.778,  deepest hole -1.038,  1-sigma level  0.110
Q1    1  -0.0737  0.1172 -0.2050  11.00000  0.05    0.78
Q2    1  -0.0024  0.0746 -0.3252  11.00000  0.05    0.70
Q3    1   0.1777  0.1483 -0.3151  11.00000  0.05    0.63
Q4    1   0.1179  0.0520 -0.2798  11.00000  0.05    0.62
Q5    1   0.0943  0.1561 -0.3630  11.00000  0.05    0.62
Q6    1  -0.5403 -0.0559 -0.0601  11.00000  0.05    0.62
Q7    1  -0.0308  0.1981 -0.2408  11.00000  0.05    0.59
Q8    1   0.6046  0.2625 -0.5323  11.00000  0.05    0.58
Q9    1  -0.3785  0.0128 -0.0650  11.00000  0.05    0.56
Q10   1  -0.5744  0.0804  0.0193  11.00000  0.05    0.55
Q11   1  -0.0501  0.1818 -0.3034  11.00000  0.05    0.54
Q12   1   0.0571  0.2049 -0.2007  11.00000  0.05    0.54
Q13   1   0.1783  0.1405 -0.2309  11.00000  0.05    0.54
Q14   1   0.0793  0.2176 -0.2580  11.00000  0.05    0.53
Q15   1  -0.5770 -0.0763  0.0613  11.00000  0.05    0.53
Q16   1   0.0990  0.2799 -0.2059  11.00000  0.05    0.52
Q17   1  -0.6274 -0.0638  0.0062  11.00000  0.05    0.48
Q18   1  -0.0012  0.1457 -0.3591  11.00000  0.05    0.47
Q19   1  -0.0243  0.1226 -0.3393  11.00000  0.05    0.47
Q20   1  -0.0831  0.2510 -0.2042  11.00000  0.05    0.47
;
_shelx_res_checksum   28055

_shelx_hkl_file
;
   0   0   3    8.26    0.32
   0   0   3    7.13    0.35
   0   0  -3    6.42    0.25
   0   0  -3    5.58    0.31
   0   0   4   18.19    0.46
   0   0   4   17.43    0.80
   0   0  -4   17.18    0.58
   0   0  -4   17.42    0.62
   0   0   5    2.16    0.29
   0   0   5    2.12    0.22
   0   0  -5    2.04    0.32
   0   0  -5    2.16    0.24
   0   0   6    2.90    0.26
   0   0   6    2.91    0.36
   0   0  -6    2.56    0.28
   0   0  -6    2.94    0.39
   0   0   7   11.51    0.49
   0   0   7   12.09    0.88
   0   0  -7   12.57    0.98
   0   0  -7   11.89    0.55
   0   0   8   28.42    1.07
   0   0  -8   28.49    0.94
   0   0  -8   30.83    1.18
   0   0   9    0.81    0.38
   0   0  -9    0.72    0.43
   0   0  -9    1.05    0.33
   0   0  10    8.20    0.72
   0   0 -10    9.20    1.31
   0   0 -10    9.11    0.67
   0   0  11   20.00    1.12
   0   0 -11   20.36    1.30
   0   0 -11   18.40    1.41
   0   0  12   14.89    1.56
   0   0 -12   14.86    1.24
   0   0 -12   13.62    0.95
   0   0  13    7.45    0.91
   0   0 -13    7.44    1.26
   0   0 -13    7.76    1.13
   0   0  14   -0.37    0.44
   0   0 -14   -0.11    0.55
   0   0 -14   -0.11    0.41
   0   0  15    1.84    0.70
   0   0 -15    0.60    0.88
   0   0 -15    1.51    1.01
   0   0  16   -0.16    0.32
   0   0 -16    0.12    0.30
   0   0  17    0.04    0.97
   0   0 -17    0.73    0.94
   0   0  18    0.03    0.53
   0   0 -18   -0.27    0.54
   0   1 -17    0.25    0.67
   0  -1  17    0.63    0.60
   0   1 -16    3.74    1.46
   0  -1  16    3.94    1.37
   0   1 -15   -0.15    0.47
   0  -1  15   -0.18    0.42
   0   1 -14   -0.30    0.65
   0   1 -14    0.95    0.87
   0  -1  14    1.36    0.51
   0   1 -13    5.63    0.94
   0   1 -13    5.09    0.82
   0  -1  13    5.37    0.73
   0   1 -12    0.92    0.61
   0   1 -12    1.21    0.52
   0  -1  12    1.31    0.48
   0   1 -11   24.35    1.88
   0   1 -11   24.98    1.22
   0  -1  11   27.59    1.64
   0   1 -10   16.95    1.00
   0   1 -10   15.31    0.92
   0  -1  10   15.19    0.81
   0  -1  10   16.26    0.87
   0   1  -9    4.65    0.54
   0   1  -9    4.64    0.60
   0  -1   9    4.31    0.50
   0  -1   9    4.15    0.46
   0   1  -8   25.47    1.00
   0   1  -8   23.23    0.92
   0  -1   8   26.50    0.93
   0  -1   8   24.49    0.85
   0   1  -7   91.27    2.19
   0   1  -7   87.08    2.05
   0  -1   7   89.04    2.01
   0  -1   7   86.22    2.22
   0   1  -6    3.29    0.35
   0   1  -6    3.88    0.55
   0  -1   6    3.31    0.33
   0  -1   6    3.49    0.47
   0   1  -5   39.49    0.96
   0   1  -5   38.59    0.98
   0  -1   5   40.39    0.95
   0  -1   5   40.65    0.94
   0   1  -4   24.70    0.67
   0   1  -4   25.60    0.65
   0  -1   4   24.88    0.61
   0  -1   4   26.24    0.68
   0   1  -3  335.24    6.02
   0   1  -3  337.43    5.79
   0  -1   3  319.06    5.58
   0  -1   3  347.72    6.16
   0   1  -2   42.80    0.93
   0   1  -2   42.99    0.72
   0  -1   2   43.60    0.65
   0  -1   2   43.37    0.80
   0   1   2   58.56    1.05
   0  -1  -2   58.66    1.24
   0   1   3   55.98    1.17
   0  -1  -3   56.14    1.21
   0   1   4   65.07    1.48
   0  -1  -4   64.48    1.49
   0  -1  -4   67.65    1.12
   0   1   5    0.88    0.26
   0  -1  -5    0.48    0.21
   0  -1  -5    0.51    0.42
   0   1   6    7.72    0.54
   0  -1  -6    8.26    0.48
   0  -1  -6    8.55    0.60
   0   1   7   11.72    0.69
   0  -1  -7   10.38    0.72
   0  -1  -7   11.11    0.46
   0   1   8   45.20    1.46
   0  -1  -8   47.41    1.18
   0  -1  -8   48.72    2.10
   0   1   9   31.21    1.28
   0  -1  -9   32.24    1.32
   0  -1  -9   33.41    1.46
   0   1  10    0.77    0.71
   0  -1 -10    0.83    0.32
   0  -1 -10    0.57    0.51
   0   1  11    3.95    0.73
   0  -1 -11    5.26    0.86
   0  -1 -11    4.53    0.54
   0   1  12   61.80    2.30
   0  -1 -12   62.11    2.61
   0  -1 -12   61.49    2.37
   0   1  13    4.80    1.25
   0  -1 -13    4.77    1.53
   0  -1 -13    4.35    0.67
   0   1  14    7.24    1.00
   0  -1 -14    5.27    1.24
   0  -1 -14    6.84    1.27
   0   1  15    5.21    1.01
   0  -1 -15    5.60    1.27
   0  -1 -15    4.46    0.82
   0   1  16    1.79    0.88
   0  -1 -16    1.91    0.70
   0   1  17    0.03    0.67
   0  -1 -17    0.62    0.54
   0   1  18    0.02    0.94
   0  -1 -18    0.18    0.52
   0   2 -17    1.49    0.92
   0  -2  17    1.73    1.11
   0   2 -16    0.40    0.77
   0  -2  16    1.22    0.59
   0   2 -15   17.51    2.17
   0  -2  15   18.06    1.72
   0   2 -14    3.68    0.87
   0  -2  14    3.83    0.68
   0   2 -13    0.40    0.41
   0  -2  13   -0.02    0.30
   0   2 -12    2.65    0.68
   0   2 -12    2.42    0.69
   0  -2  12    2.85    0.53
   0  -2  12    2.97    0.59
   0   2 -11    7.34    0.80
   0   2 -11    7.88    0.87
   0  -2  11    7.41    0.71
   0  -2  11    7.77    0.65
   0   2 -10   87.25    3.04
   0   2 -10   84.89    2.56
   0  -2  10   87.04    2.37
   0  -2  10   85.25    2.56
   0   2  -9    7.58    1.04
   0   2  -9    6.17    0.60
   0  -2   9    6.74    0.51
   0  -2   9    6.54    0.86
   0   2  -8   42.05    1.29
   0   2  -8   40.77    1.39
   0  -2   8   41.02    1.26
   0  -2   8   39.30    1.10
   0   2  -7  375.04    8.24
   0   2  -7  387.93    8.42
   0  -2   7  381.80    8.05
   0  -2   7  378.65    7.79
   0   2  -6   99.58    2.34
   0   2  -6  104.55    2.40
   0  -2   6  100.09    2.53
   0  -2   6  105.42    2.04
   0   2  -5   19.08    0.55
   0   2  -5   18.94    0.72
   0  -2   5   20.54    0.70
   0  -2   5   19.17    0.50
   0   2  -4   34.66    0.94
   0   2  -4   34.63    0.72
   0  -2   4   34.66    0.65
   0  -2   4   34.98    0.93
   0   2  -3   20.52    0.65
   0   2  -3   20.47    0.39
   0  -2   3   20.24    0.36
   0  -2   3   20.18    0.64
   0   2  -2   88.44    1.93
   0  -2   2   89.81    1.93
   0  -2   2   89.60    1.09
   0   2  -1    1.67    0.20
   0  -2   1    1.43    0.19
   0   2   0    4.96    0.13
   0  -2   0    8.68    0.18
   0   2   1   37.28    0.68
   0  -2  -1   38.12    0.84
   0   2   2   56.48    1.11
   0  -2  -2   53.88    1.12
   0   2   3   81.52    1.70
   0  -2  -3   79.78    1.71
   0   2   4    3.87    0.41
   0  -2  -4    4.27    0.40
   0   2   5    2.93    0.38
   0  -2  -5    1.92    0.63
   0   2   6   -0.05    0.23
   0  -2  -6    0.44    0.25
   0  -2  -6    0.11    0.10
   0   2   7    7.67    0.67
   0  -2  -7    8.51    0.69
   0  -2  -7    8.78    0.36
   0   2   8    2.18    0.52
   0  -2  -8    2.79    0.27
   0  -2  -8    2.31    0.85
   0   2   9    5.71    0.72
   0  -2  -9    7.90    0.84
   0  -2  -9    6.53    0.43
   0   2  10    2.90    0.65
   0  -2 -10    2.64    0.72
   0  -2 -10    2.70    0.38
   0   2  11   16.66    1.17
   0  -2 -11   15.86    1.95
   0  -2 -11   17.00    0.81
   0   2  12  116.86    3.67
   0  -2 -12  118.39    4.13
   0  -2 -12  114.84    3.42
   0   2  13   14.25    1.28
   0  -2 -13   13.32    1.50
   0  -2 -13   12.67    0.87
   0   2  14    9.15    1.14
   0  -2 -14    7.69    0.81
   0  -2 -14    6.03    1.39
   0   2  15    0.03    0.48
   0  -2 -15    0.02    0.59
   0  -2 -15    0.20    0.52
   0   2  16   10.69    1.94
   0  -2 -16    9.27    0.94
   0  -2 -16   -0.08    1.64
   0   2  17    0.00    0.90
   0  -2 -17    1.86    0.64
   0   2  18    0.01    0.42
   0  -3  17    2.75    0.75
   0   3 -16    5.72    1.26
   0  -3  16    6.09    1.26
   0   3 -15    1.11    0.79
   0  -3  15    1.06    0.50
   0   3 -14   14.26    2.06
   0  -3  14   13.60    0.93
   0   3 -13    0.17    0.50
   0  -3  13    0.17    0.43
   0  -3  13    0.54    0.50
   0   3 -12   -0.02    0.43
   0  -3  12    0.26    0.26
   0  -3  12    0.08    0.55
   0   3 -11    0.43    0.45
   0  -3  11    0.28    0.38
   0  -3  11    0.26    0.26
   0   3 -10   92.91    2.54
   0   3 -10   89.17    3.44
   0  -3  10   93.56    2.64
   0  -3  10   94.82    2.23
   0   3  -9   70.20    2.24
   0   3  -9   71.99    1.94
   0  -3   9   68.21    2.04
   0  -3   9   69.46    1.64
   0   3  -8   47.32    1.64
   0   3  -8   46.76    1.32
   0  -3   8   46.05    1.11
   0  -3   8   46.25    1.47
   0   3  -7   72.12    2.07
   0   3  -7   71.13    1.64
   0  -3   7   72.56    1.95
   0  -3   7   75.53    1.70
   0   3  -6  192.30    3.90
   0   3  -6  186.04    4.27
   0  -3   6  189.51    3.52
   0  -3   6  193.14    4.20
   0   3  -5    0.57    0.20
   0   3  -5    0.25    0.29
   0  -3   5    0.50    0.16
   0  -3   5    0.76    0.27
   0   3  -4    6.72    0.72
   0   3  -4    5.81    0.20
   0  -3   4    5.81    0.21
   0  -3   4    6.13    0.47
   0   3  -3   21.22    0.73
   0  -3   3   20.30    0.28
   0  -3   3   21.58    0.72
   0   3  -2  121.29    2.46
   0  -3   2  116.70    2.36
   0  -3   1    2.83    0.29
   0  -3   1    2.40    0.10
   0   3   0   25.85    0.55
   0  -3   0   25.59    0.59
   0   3   1  388.78    7.05
   0  -3  -1  399.69    7.15
   0   3   2  242.16    4.48
   0  -3  -2  242.21    4.52
   0   3   3    0.32    0.37
   0  -3  -3    0.62    0.24
   0   3   4    1.61    0.51
   0  -3  -4    1.42    0.34
   0   3   5    6.20    0.52
   0  -3  -5    6.07    0.82
   0   3   6   13.23    0.76
   0  -3  -6   13.26    0.82
   0   3   7    0.88    0.40
   0  -3  -7    0.86    0.43
   0  -3  -7    0.86    0.17
   0   3   8   10.99    0.81
   0  -3  -8   10.19    0.56
   0  -3  -8    9.12    0.88
   0   3   9    9.63    0.90
   0  -3  -9   11.39    1.04
   0  -3  -9   10.83    0.46
   0   3  10    4.54    0.76
   0  -3 -10    3.37    0.84
   0  -3 -10    3.92    0.38
   0   3  11   43.13    2.56
   0  -3 -11   44.46    1.29
   0  -3 -11   44.94    2.18
   0   3  12   62.60    2.59
   0  -3 -12   67.65    1.86
   0  -3 -12   68.52    3.01
   0   3  13   19.84    1.58
   0  -3 -13   20.75    1.36
   0  -3 -13   18.93    1.82
   0   3  14    0.81    0.74
   0  -3 -14    0.97    1.41
   0  -3 -14    1.32    0.68
   0   3  15   -0.01    0.64
   0  -3 -15    0.55    0.38
   0  -3 -15   -0.04    0.80
   0   3  16   -0.01    1.26
   0  -3 -16    6.06    1.57
   0  -3 -16    7.31    0.80
   0   3  17    0.02    0.57
   0  -3 -17    0.09    0.68
   0   3  18    0.04    0.56
   0  -4  17    9.42    0.95
   0  -4  16    0.16    0.54
   0   4 -15   -0.05    0.44
   0  -4  15    0.05    0.23
   0   4 -14    0.65    0.61
   0  -4  14   -0.17    0.50
   0  -4  14    0.50    0.48
   0   4 -13    9.94    1.28
   0  -4  13   11.20    1.65
   0  -4  13   11.17    0.73
   0   4 -12    3.11    1.20
   0  -4  12    2.22    0.39
   0  -4  12    2.16    0.67
   0   4 -11   -0.21    0.41
   0  -4  11    0.00    0.35
   0  -4  11   -0.20    0.30
   0   4 -10   19.34    1.29
   0  -4  10   21.50    1.20
   0  -4  10   21.48    0.96
   0   4  -9   59.63    2.16
   0  -4   9   64.40    2.06
   0  -4   9   64.30    1.40
   0   4  -8    0.86    0.44
   0  -4   8    0.58    0.16
   0  -4   8    0.51    0.39
   0   4  -7   70.22    2.15
   0  -4   7   73.03    1.32
   0  -4   7   74.01    2.11
   0   4  -6    2.97    0.54
   0  -4   6    3.16    0.15
   0  -4   6    3.60    0.50
   0   4  -5    1.61    0.42
   0  -4   5    1.81    0.40
   0  -4   5    1.47    0.08
   0   4  -4   13.18    0.70
   0  -4   4   12.69    0.19
   0  -4   4   14.01    0.26
   0  -4   4   13.73    0.70
   0   4  -3    4.74    0.50
   0  -4   3    5.54    0.71
   0  -4   2    0.58    0.26
   0  -4   1    5.51    0.45
   0  -4   1    6.63    0.22
   0   4   0    2.41    0.15
   0  -4   0    2.66    0.17
   0  -4   0    2.69    0.32
   0   4   1   17.55    0.49
   0  -4  -1   17.24    0.70
   0   4   2  102.91    2.05
   0  -4  -2  105.78    2.14
   0   4   3   43.56    1.15
   0  -4  -3   46.08    1.21
   0   4   4  232.64    4.90
   0  -4  -4  239.40    5.47
   0   4   5   18.90    0.87
   0  -4  -5   19.47    0.91
   0   4   6   45.75    1.52
   0  -4  -6   44.46    1.55
   0   4   7   26.42    1.20
   0  -4  -7   25.83    1.26
   0   4   8    0.38    0.31
   0  -4  -8    0.05    0.13
   0  -4  -8    0.44    0.52
   0   4   9   62.20    2.19
   0  -4  -9   63.85    1.36
   0  -4  -9   61.28    2.35
   0   4  10    1.43    0.62
   0  -4 -10    1.36    0.69
   0  -4 -10    1.08    0.38
   0   4  11    4.62    1.37
   0  -4 -11    5.27    0.66
   0  -4 -11    5.36    1.07
   0   4  12   26.52    1.77
   0  -4 -12   29.61    1.01
   0  -4 -12   28.63    2.02
   0   4  13    9.33    1.29
   0  -4 -13   10.72    0.70
   0  -4 -13   10.76    1.51
   0   4  14    3.78    1.53
   0  -4 -14    2.73    1.25
   0  -4 -14    3.41    0.54
   0   4  15    0.18    0.61
   0  -4 -15    0.31    0.80
   0  -4 -15    0.22    0.52
   0   4  16    0.35    0.70
   0  -4 -16    0.21    0.59
   0  -4 -16    0.29    0.87
   0   4  17    3.59    1.23
   0  -4 -17    2.88    1.56
   0   4  18    0.04    0.59
   0  -5  15    2.78    0.48
   0  -5  15    0.00    0.90
   0  -5  14   -0.01    0.60
   0  -5  14    0.04    0.19
   0   5 -13    2.38    0.93
   0  -5  13    2.23    0.78
   0  -5  13    2.07    0.57
   0   5 -12    4.93    1.05
   0  -5  12    4.36    1.36
   0  -5  12    4.57    0.40
   0   5 -11    0.43    0.48
   0  -5  11    0.11    0.16
   0  -5  11    0.18    0.40
   0   5 -10    0.36    0.47
   0  -5  10   -0.03    0.40
   0  -5  10    0.22    0.15
   0   5  -9   27.77    2.23
   0  -5   9   28.88    0.68
   0  -5   9   29.48    1.93
   0   5  -8   17.69    1.71
   0  -5   8   15.87    0.40
   0  -5   8   16.16    1.05
   0   5  -7   16.73    1.55
   0  -5   7   16.00    0.42
   0  -5   7   16.83    0.99
   0   5  -6   10.67    0.89
   0  -5   6   11.80    1.17
   0  -5   6   10.87    0.25
   0  -5   6   11.53    0.37
   0   5  -5   81.24    2.36
   0  -5   5   88.02    1.11
   0  -5   5   87.55    1.05
   0  -5   5   85.84    2.35
   0   5  -4   12.00    0.80
   0  -5   4   12.45    0.77
   0  -5   3    0.63    0.33
   0  -5   2    7.16    0.57
   0   5  -1    1.93    0.09
   0  -5   1    1.73    0.12
   0  -5   1    1.58    0.35
   0   5   0    3.40    0.18
   0  -5   0    3.29    0.23
   0  -5   0    3.26    0.39
   0   5   1   30.94    0.73
   0  -5  -1   32.83    0.82
   0   5   2  412.28    8.11
   0  -5  -2  411.29    8.25
   0   5   3  251.06    5.17
   0  -5  -3  257.89    5.40
   0   5   4   90.45    2.18
   0  -5  -4   86.36    2.20
   0   5   5   10.02    0.72
   0  -5  -5   11.21    0.75
   0   5   6  175.93    4.24
   0  -5  -6  169.35    4.23
   0   5   7   24.89    1.18
   0  -5  -7   24.03    1.27
   0   5   8    0.65    0.46
   0  -5  -8    0.49    0.80
   0   5   9   36.13    1.71
   0  -5  -9   37.37    1.84
   0   5  10   25.49    1.55
   0  -5 -10   26.41    0.76
   0  -5 -10   26.36    1.77
   0   5  11    0.57    0.60
   0  -5 -11    0.43    0.36
   0  -5 -11    1.04    0.68
   0   5  12   -0.17    0.35
   0  -5 -12   -0.07    0.42
   0  -5 -12    0.06    0.23
   0   5  13   -0.15    0.64
   0  -5 -13    0.28    0.78
   0  -5 -13    0.61    0.28
   0   5  14   26.94    2.81
   0  -5 -14   24.69    2.30
   0  -5 -14   25.04    1.05
   0   5  15    0.46    0.57
   0  -5 -15    0.14    0.70
   0  -5 -15    0.00    0.26
   0   5  16    6.46    1.46
   0  -5 -16    6.72    1.81
   0  -5 -16    6.37    0.71
   0   5  17    0.28    0.71
   0  -5 -17    0.00    0.92
   0  -6  16    0.00    0.32
   0  -6  15    0.00    0.33
   0  -6  14    0.08    0.20
   0  -6  14   -0.01    0.33
   0  -6  14   -0.04    0.12
   0  -6  13    1.28    0.42
   0  -6  13    0.00    0.71
   0  -6  13    0.99    0.26
   0  -6  12    3.19    0.30
   0  -6  12    3.84    0.86
   0  -6  12    2.90    0.47
   0   6 -11    1.10    0.86
   0  -6  11    1.40    1.11
   0  -6  11    1.81    0.23
   0  -6  11    2.66    0.36
   0   6 -10    1.33    0.81
   0  -6  10    1.45    0.68
   0  -6  10    2.05    0.29
   0  -6  10    1.81    0.19
   0   6  -9    2.73    0.81
   0  -6   9    1.59    0.36
   0  -6   9    3.27    0.71
   0  -6   9    2.61    0.24
   0   6  -8   31.88    1.74
   0  -6   8   32.07    0.61
   0  -6   8   32.89    1.58
   0  -6   8   34.55    0.82
   0   6  -7    3.79    0.77
   0  -6   7    3.79    0.12
   0  -6   7    3.44    0.70
   0  -6   7    3.44    0.15
   0   6  -6    0.52    0.45
   0  -6   6    0.31    0.41
   0  -6   5  107.38    2.96
   0  -6   4    0.18    0.30
   0  -6   3    5.88    0.63
   0   6  -2   31.06    0.42
   0  -6   2   30.07    1.15
   0   6  -1    5.83    0.23
   0  -6   1    6.04    0.83
   0   6   0    7.92    0.38
   0  -6   0    7.11    0.55
   0  -6   0    8.10    0.49
   0   6   1   93.84    2.03
   0  -6  -1   90.98    2.17
   0  -6  -1   93.50    1.98
   0   6   2   10.27    0.48
   0  -6  -2   10.45    0.54
   0   6   3  278.69    5.81
   0  -6  -3  291.60    6.21
   0   6   4   19.62    1.16
   0  -6  -4   21.57    0.94
   0   6   5    2.53    0.47
   0  -6  -5    2.45    0.50
   0   6   6   53.77    1.75
   0  -6  -6   53.93    1.83
   0   6   7  119.79    3.29
   0  -6  -7  117.16    4.02
   0   6   8    8.25    0.95
   0  -6  -8    9.52    1.04
   0   6   9    1.81    0.67
   0  -6  -9    1.50    0.72
   0   6  10   21.72    2.24
   0  -6 -10   21.66    1.70
   0   6  11   25.47    1.67
   0  -6 -11   22.73    2.70
   0  -6 -11   23.50    0.76
   0   6  12    1.59    0.72
   0  -6 -12    2.41    0.83
   0  -6 -12    0.04    0.39
   0   6  13    9.65    1.36
   0  -6 -13    8.66    1.61
   0  -6 -13    7.84    0.54
   0   6  14   16.33    1.73
   0  -6 -14   14.96    2.05
   0  -6 -14   15.81    0.77
   0   6  15   10.90    1.68
   0  -6 -15   11.78    1.11
   0  -6 -15   13.18    2.10
   0   6  16    6.25    1.56
   0  -6 -16    6.87    1.88
   0   6  17    1.38    1.06
   0  -6 -17    0.69    1.37
   0  -7  15    0.01    0.67
   0  -7  14   -0.01    0.38
   0  -7  13   -0.01    0.37
   0  -7  12    8.78    0.46
   0  -7  12    8.06    0.65
   0  -7  12    9.49    1.25
   0  -7  11    1.41    0.21
   0  -7  11    1.58    0.14
   0  -7  11    1.16    0.75
   0  -7  10    4.93    0.89
   0  -7  10    3.95    0.28
   0  -7  10    4.11    0.14
   0  -7   9    1.17    0.66
   0  -7   8   28.99    1.64
   0  -7   7    5.85    0.88
   0  -7   6    1.36    0.60
   0  -7   5   16.62    1.62
   0  -7   4    2.53    0.59
   0  -7   3   19.78    1.08
   0   7  -2   33.00    0.54
   0  -7   2   33.83    1.74
   0   7  -1   48.34    0.90
   0  -7   1   46.43    1.53
   0   7   0  111.64    2.00
   0  -7   0  110.82    2.42
   0  -7   0  110.81    2.73
   0   7   1    1.66    0.24
   0  -7  -1    1.86    0.44
   0  -7  -1    1.71    0.40
   0   7   2   12.25    0.76
   0  -7  -2   12.59    0.64
   0   7   3   35.43    1.12
   0  -7  -3   37.58    1.26
   0   7   4   97.30    2.47
   0  -7  -4  100.40    3.13
   0   7   5    0.17    0.30
   0  -7  -5    0.48    0.55
   0   7   6   11.32    0.88
   0  -7  -6   11.33    0.96
   0   7   7   51.66    1.93
   0  -7  -7   51.76    2.06
   0   7   8   23.34    1.37
   0  -7  -8   22.51    1.49
   0   7   9    3.19    1.23
   0  -7  -9    2.46    0.86
   0   7  10   25.55    1.60
   0  -7 -10   24.27    1.85
   0   7  11    2.15    0.68
   0  -7 -11    1.38    1.21
   0  -7 -11    0.50    0.24
   0   7  12    1.73    0.63
   0  -7 -12    1.25    0.73
   0  -7 -12    0.03    0.21
   0   7  13    1.21    0.64
   0  -7 -13    0.98    0.74
   0  -7 -13    0.03    0.22
   0   7  14   -0.37    0.56
   0  -7 -14   -0.09    1.08
   0  -7 -14    0.01    0.31
   0   7  15   22.66    2.21
   0  -7 -15   26.40    2.77
   0   7  16    0.36    0.53
   0  -7 -16   -0.63    0.67
   0   7  17   -0.20    0.87
   0  -7 -17   -0.37    1.08
   0  -8  14   -0.01    0.44
   0  -8  13   12.67    1.58
   0  -8  12   18.64    2.51
   0  -8  11    0.99    0.76
   0  -8  10    0.57    1.05
   0  -8   9    0.71    0.66
   0  -8   8   14.25    1.34
   0  -8   7   48.98    2.19
   0  -8   6    1.29    0.64
   0  -8   5    0.07    0.56
   0  -8   4   18.33    1.18
   0  -8   3   60.34    2.11
   0   8  -2    0.69    0.11
   0  -8   2    0.89    0.45
   0   8  -1   18.53    0.40
   0  -8   1   19.52    1.03
   0   8   0  122.77    2.28
   0  -8   0  127.37    2.65
   0  -8   0  124.89    3.20
   0   8   1   22.96    0.69
   0  -8  -1   22.55    1.02
   0  -8  -1   22.88    0.83
   0   8   2    3.64    0.38
   0  -8  -2    2.32    0.67
   0  -8  -2    4.06    0.53
   0   8   3    2.18    0.39
   0  -8  -3    2.25    0.45
   0   8   4   52.82    1.98
   0  -8  -4   54.45    1.80
   0   8   5    7.65    1.10
   0  -8  -5    7.52    0.79
   0   8   6   17.54    1.09
   0  -8  -6   16.92    1.19
   0   8   7    6.62    1.31
   0  -8  -7    5.91    0.92
   0   8   8   58.71    2.91
   0  -8  -8   62.64    2.53
   0   8   9    2.00    0.71
   0  -8  -9    1.39    0.81
   0   8  10    6.50    1.08
   0  -8 -10    5.44    1.88
   0   8  11    0.06    0.67
   0  -8 -11    1.28    0.79
   0   8  12    0.32    0.46
   0  -8 -12    0.03    0.15
   0  -8 -12   -0.23    0.53
   0   8  13    2.91    1.78
   0  -8 -13    3.82    1.34
   0   8  14    0.79    0.66
   0  -8 -14    0.00    0.34
   0  -8 -14    0.13    1.29
   0   8  15   14.48    1.98
   0  -8 -15   15.54    2.40
   0   8  16    1.19    1.29
   0  -8 -16    3.12    1.54
   0  -9  14    0.00    0.57
   0  -9  13    1.21    0.95
   0  -9  12    3.70    1.81
   0  -9  11    2.04    0.96
   0  -9  10    1.51    0.87
   0  -9   9   -0.13    0.52
   0  -9   8    1.27    0.77
   0  -9   7   37.81    2.02
   0  -9   6   25.89    1.74
   0  -9   5   77.95    3.73
   0  -9   4    4.84    0.88
   0  -9   3   47.43    1.98
   0   9  -2   26.27    0.47
   0  -9   2   26.93    1.42
   0   9  -1    3.02    0.19
   0  -9   1    3.49    0.66
   0   9   0   25.62    0.66
   0  -9   0   24.81    1.25
   0   9   1   27.76    1.02
   0  -9  -1   27.91    1.26
   0  -9  -1   27.57    1.01
   0   9   2    7.40    0.50
   0  -9  -2    8.77    1.11
   0  -9  -2    6.70    0.60
   0   9   3   17.83    0.82
   0  -9  -3   18.37    1.00
   0  -9  -3   17.32    0.94
   0   9   4    3.69    0.53
   0  -9  -4    2.89    0.94
   0   9   5    0.27    0.32
   0  -9  -5   -0.11    0.57
   0   9   6   11.76    0.93
   0  -9  -6    9.20    1.03
   0   9   7    5.11    0.81
   0  -9  -7    5.08    1.36
   0   9   8    9.58    1.06
   0  -9  -8    7.43    1.80
   0   9   9   16.62    1.42
   0  -9  -9   16.46    1.57
   0   9  10    2.12    0.86
   0  -9 -10    2.09    0.98
   0   9  11   64.74    3.04
   0  -9 -11   60.99    3.26
   0   9  12    7.64    2.11
   0  -9 -12    8.55    1.63
   0   9  13    0.01    0.46
   0  -9 -13    0.01    0.14
   0  -9 -13    0.11    0.82
   0   9  14    1.93    1.19
   0  -9 -14    2.61    1.40
   0   9  15    3.54    1.39
   0  -9 -15    3.50    1.71
   0   9  16    1.19    2.46
   0  -9 -16    6.61    1.96
   0 -10  13    1.48    1.11
   0 -10  12    0.58    0.86
   0 -10  11   -0.22    0.67
   0 -10  10    7.02    1.40
   0 -10   9    0.35    0.68
   0 -10   8    2.45    0.98
   0 -10   7   25.99    1.89
   0 -10   6   45.47    2.41
   0 -10   5   11.56    1.35
   0 -10   4   40.62    2.12
   0 -10   3   17.15    2.01
   0  10  -2   27.25    0.49
   0 -10   2   29.06    1.60
   0  10  -1    1.78    0.26
   0 -10   1    2.55    0.99
   0  10   0    0.08    0.18
   0 -10   0   -0.46    0.32
   0  10   1   29.29    0.88
   0 -10  -1   29.60    2.00
   0  10   2    0.39    0.38
   0 -10  -2    0.30    0.31
   0 -10  -2    0.11    0.39
   0  10   3   52.64    1.57
   0 -10  -3   54.12    2.47
   0 -10  -3   50.01    1.80
   0  10   4    0.31    0.43
   0 -10  -4    0.26    0.31
   0 -10  -4   -0.12    0.33
   0  10   5   12.42    0.94
   0 -10  -5   11.95    1.06
   0  10   6    6.16    0.80
   0 -10  -6    4.79    0.92
   0  10   7   -0.23    0.40
   0 -10  -7    0.00    0.43
   0  10   8    1.91    0.70
   0 -10  -8    1.09    0.80
   0  10   9   33.49    1.92
   0 -10  -9   32.24    2.15
   0  10  10    0.22    0.83
   0 -10 -10   -0.34    0.61
   0  10  11    0.92    0.88
   0 -10 -11    1.87    1.01
   0  10  12   19.94    1.96
   0 -10 -12   23.31    3.29
   0  10  13   -0.08    0.48
   0 -10 -13    0.27    0.58
   0 -10 -13   -0.03    0.16
   0  10  14    0.76    1.00
   0 -10 -14    1.01    1.19
   0  10  15   -0.59    1.41
   0 -10 -15    0.86    1.08
   0 -11  12    1.56    1.16
   0 -11  11    0.00    0.38
   0 -11  10    0.70    0.93
   0 -11   9    2.99    1.17
   0 -11   8    3.00    1.17
   0 -11   7    1.84    0.97
   0 -11   6   15.72    1.71
   0 -11   5    5.51    1.19
   0 -11   4    4.09    1.02
   0 -11   3    3.74    0.97
   0  11  -2   25.28    0.45
   0 -11   2   27.74    1.69
   0  11  -1   12.31    0.51
   0 -11   1   11.71    1.20
   0  11   0    5.79    0.53
   0 -11   0    5.35    0.91
   0  11   1   13.16    0.61
   0 -11  -1   13.29    1.16
   0  11   2    4.44    0.49
   0 -11  -2    5.03    1.22
   0 -11  -2    5.22    0.64
   0  11   3    5.78    0.89
   0 -11  -3    6.38    0.84
   0 -11  -3    6.36    0.79
   0  11   4    5.81    0.68
   0 -11  -4    5.89    1.18
   0 -11  -4    5.45    1.23
   0  11   5   30.24    1.38
   0 -11  -5   27.60    1.56
   0 -11  -5   30.36    1.47
   0  11   6   19.75    1.24
   0 -11  -6   17.76    1.40
   0 -11  -6   18.76    1.16
   0  11   7    0.06    0.31
   0 -11  -7   -0.15    0.37
   0  11   8    7.44    1.09
   0 -11  -8    8.81    1.23
   0  11   9   38.57    2.12
   0 -11  -9   36.96    2.39
   0  11  10   22.34    1.76
   0 -11 -10   20.46    1.99
   0  11  11    5.25    1.20
   0 -11 -11    2.28    2.12
   0  11  12    3.58    1.21
   0 -11 -12    3.15    1.39
   0  11  13   11.52    1.79
   0 -11 -13   11.58    2.09
   0  11  14    0.31    1.45
   0 -11 -14    0.48    1.06
   0  11  15    1.33    1.26
   0 -11 -15    1.75    1.50
   0 -12  11   -0.15    0.74
   0 -12  10    0.43    0.90
   0 -12   9    9.74    1.73
   0 -12   8    0.85    0.95
   0 -12   7    1.07    0.95
   0 -12   6   -0.14    0.63
   0 -12   5    2.84    1.09
   0 -12   4   15.78    2.50
   0 -12   3    0.33    0.62
   0 -12   2    0.66    1.04
   0  12  -1    2.54    0.48
   0  12  -1    3.11    0.33
   0 -12   1    3.22    0.92
   0  12   0   23.17    0.71
   0 -12   0   21.91    1.59
   0  12   1    0.78    0.28
   0 -12  -1    0.78    0.61
   0  12   2   21.35    0.91
   0 -12  -2   21.73    1.45
   0  12   3    0.51    0.35
   0 -12  -3    0.84    0.78
   0 -12  -3    0.17    0.44
   0  12   4    1.11    0.43
   0 -12  -4    0.57    0.56
   0 -12  -4    0.52    0.55
   0  12   5   19.02    1.66
   0 -12  -5   16.68    1.22
   0 -12  -5   16.53    1.36
   0  12   6   28.90    1.55
   0 -12  -6   27.07    1.78
   0 -12  -6   28.39    2.03
   0  12   7    2.66    0.76
   0 -12  -7    2.15    0.67
   0 -12  -7    2.47    0.89
   0  12   8    6.66    1.09
   0 -12  -8    6.45    0.84
   0 -12  -8    6.79    1.24
   0  12   9    0.73    0.63
   0 -12  -9    0.41    0.45
   0 -12  -9    0.03    0.75
   0  12  10   22.57    1.90
   0 -12 -10   21.43    2.13
   0 -12 -10   22.59    1.29
   0  12  11   -0.20    0.53
   0 -12 -11    0.08    0.29
   0 -12 -11   -0.47    0.62
   0  12  12   -0.38    0.72
   0 -12 -12    0.02    0.83
   0  12  13    0.77    2.09
   0 -12 -13    5.63    1.66
   0  12  14    1.63    1.19
   0 -12 -14    1.04    1.41
   0 -13  10   -0.17    1.28
   0 -13   9    8.36    1.85
   0 -13   8    0.11    1.10
   0 -13   7    2.16    1.17
   0 -13   6    1.95    1.74
   0 -13   5   14.97    1.91
   0 -13   4    0.38    0.76
   0 -13   3    4.29    1.21
   0 -13   2    2.98    1.04
   0  13  -1   22.71    0.72
   0  13  -1   21.57    0.53
   0 -13   1   26.74    2.69
   0  13   0   33.78    0.94
   0 -13   0   32.69    2.07
   0  13   1    0.16    0.33
   0 -13  -1    0.09    0.49
   0  13   2    6.26    0.86
   0 -13  -2    5.99    1.06
   0  13   3   26.38    1.16
   0 -13  -3   24.68    1.67
   0  13   4   26.14    1.83
   0 -13  -4   27.07    1.69
   0  13   5    0.05    0.36
   0 -13  -5    0.39    0.46
   0 -13  -5   -0.20    0.65
   0  13   6   15.22    1.20
   0 -13  -6   13.76    1.22
   0 -13  -6   14.03    1.48
   0  13   7    4.69    0.88
   0 -13  -7    3.64    0.80
   0 -13  -7    3.57    1.06
   0  13   8    0.74    0.99
   0 -13  -8   -0.03    0.76
   0 -13  -8    0.81    0.50
   0  13   9    0.82    1.11
   0 -13  -9    0.90    0.51
   0 -13  -9   -0.04    0.84
   0  13  10    0.05    0.74
   0 -13 -10    0.02    0.58
   0  13  11    5.57    1.33
   0 -13 -11    4.51    0.78
   0 -13 -11    4.90    1.51
   0  13  12   -0.50    0.76
   0 -13 -12    0.04    0.86
   0  13  13   -0.39    0.67
   0 -13 -13    0.74    0.79
   0 -14   8    1.87    1.30
   0 -14   7   -0.24    0.83
   0 -14   6    0.63    0.98
   0 -14   5   11.70    1.90
   0 -14   4   15.38    1.98
   0 -14   3    2.02    1.69
   0 -14   2    0.14    0.62
   0  14  -1   14.78    0.69
   0  14  -1   13.90    0.50
   0 -14   1   16.62    1.72
   0  14   0   14.71    0.82
   0  14   0   14.09    1.17
   0 -14   0   15.30    2.45
   0  14   1   -0.04    0.32
   0 -14  -1   -0.14    0.49
   0  14   2   -0.02    0.39
   0 -14  -2   -0.19    0.48
   0  14   3   25.68    1.65
   0 -14  -3   24.66    2.56
   0  14   4    0.41    0.42
   0 -14  -4    0.41    0.60
   0  14   5    4.32    0.80
   0 -14  -5    5.01    0.98
   0  14   6   11.09    1.64
   0 -14  -6    9.28    1.19
   0  14   7    9.40    1.21
   0 -14  -7    9.55    1.14
   0  14   8    1.29    0.74
   0 -14  -8    1.33    0.96
   0 -14  -8    0.03    0.85
   0  14   9   11.06    1.50
   0 -14  -9   11.94    1.73
   0  14  10    0.09    0.52
   0 -14 -10    0.23    0.57
   0 -14 -10   -0.18    0.60
   0  14  11   -0.01    0.51
   0 -14 -11    0.06    0.56
   0  14  12    0.62    0.94
   0 -15   6   -1.12    1.18
   0 -15   5    0.06    0.66
   0 -15   4   15.30    2.15
   0 -15   3    0.87    1.03
   0 -15   2    2.53    1.91
   0 -15   1    1.74    1.06
   0 -15   0    3.35    1.18
   0  15   1   11.64    0.99
   0  15   1   11.00    0.98
   0 -15  -1   10.69    2.34
   0  15   2    9.74    0.74
   0 -15  -2    8.98    1.45
   0  15   3    4.80    1.10
   0 -15  -3    7.01    1.23
   0  15   4    8.23    0.91
   0 -15  -4    8.77    1.31
   0  15   5    2.90    0.76
   0 -15  -5    2.36    1.49
   0  15   6    0.59    0.57
   0 -15  -6    0.14    0.99
   0  15   7   12.45    1.38
   0 -15  -7   13.74    1.40
   0  15   8    0.00    1.49
   0 -15  -8    3.37    0.88
   0  15   9   -0.02    1.31
   0 -15  -9    1.07    0.68
   0  15  10    0.00    1.41
   0 -15 -10    1.00    0.64
   0 -16   4    2.03    2.07
   0 -16   3    2.09    1.36
   0 -16   2    0.42    0.92
   0 -16   1    0.75    1.54
   0 -16   0    4.79    1.44
   0 -16  -1   10.95    1.70
   0 -16  -2    0.28    0.71
   0  16   3    0.06    0.29
   0 -16  -3    0.05    0.82
   0  16   4    2.60    1.15
   0 -16  -4    4.56    1.14
   0  16   5    0.05    0.37
   0 -16  -5   -0.24    0.50
   0  16   6    0.74    1.13
   0 -16  -6    1.58    0.83
   0  16   7    2.96    0.99
   0 -16  -7    3.01    0.99
   0  16   8    0.00    0.85
   0 -16  -8    1.88    0.78
   0 -17  -1    5.62    1.56
   0 -17  -2    0.24    0.78
   0 -17  -3    1.11    0.99
   0  17   4   -0.16    0.42
   0 -17  -4   -0.12    0.64
   1 -16  -7   -0.02    0.70
   1 -16  -7    1.50    1.08
  -1  16   7   -0.02    0.97
   1 -16  -6    2.45    1.08
  -1  16   6    2.20    0.88
   1 -16  -5    2.54    1.16
  -1  16   5    3.23    0.86
   1 -16  -4    3.04    1.12
  -1  16   4    2.05    0.73
   1 -16  -3   -0.32    0.62
  -1  16   3   -0.04    0.36
   1 -16  -2    8.33    2.55
  -1  16   2    9.49    0.85
   1 -16  -1    1.14    1.03
   1 -16   0    3.48    1.38
   1 -16   1    9.23    2.87
   1 -16   2   -0.10    0.74
   1 -16   3   -0.05    0.68
   1 -16   4    0.07    1.17
   1 -15 -10   -0.06    0.68
   1 -15 -10   -0.16    0.80
   1 -15  -9   -0.10    0.76
   1 -15  -9    0.99    0.91
  -1  15   9    0.07    0.68
   1 -15  -8   -0.12    0.43
   1 -15  -8    0.06    0.50
  -1  15   8   -0.01    0.45
   1 -15  -7   -0.15    0.85
   1 -15  -7    1.38    0.81
  -1  15   7    1.66    0.76
   1 -15  -6   -0.09    1.01
   1 -15  -6    4.74    1.04
  -1  15   6    3.84    0.89
   1 -15  -5    9.62    1.48
   1 -15  -5    9.73    1.40
  -1  15   5   11.13    1.14
   1 -15  -4    1.34    1.31
   1 -15  -4    0.57    0.72
  -1  15   4    1.15    0.56
   1 -15  -3    0.58    0.82
  -1  15   3    0.79    0.48
   1 -15  -2   13.45    1.78
  -1  15   2   15.87    0.96
   1 -15  -1    4.13    1.20
  -1  15   1    2.86    0.51
   1 -15   0    4.32    1.33
   1 -15   1    6.43    1.54
   1 -15   2   15.17    3.08
   1 -15   3    0.26    0.83
   1 -15   4   -0.08    0.71
   1 -15   5   -0.42    1.00
   1 -15   6   10.66    2.16
   1 -14 -11    1.39    0.69
   1 -14 -11   -0.03    1.01
  -1  14  11   -0.02    0.94
   1 -14 -10   -0.19    1.11
   1 -14 -10    0.43    0.54
  -1  14  10   -0.07    0.68
   1 -14  -9    0.05    0.78
  -1  14   9   -0.05    0.47
   1 -14  -8    4.47    1.01
   1 -14  -8    0.15    1.11
  -1  14   8    5.50    1.05
   1 -14  -7    0.70    0.63
   1 -14  -7   -0.07    0.64
  -1  14   7    0.57    0.90
   1 -14  -6    0.77    0.83
   1 -14  -6    1.20    1.20
  -1  14   6    1.75    0.69
   1 -14  -5   16.02    2.25
   1 -14  -5   13.87    2.10
  -1  14   5   16.22    1.26
   1 -14  -4    9.13    1.33
   1 -14  -4    8.20    1.15
  -1  14   4    9.55    1.38
   1 -14  -3    5.12    0.97
   1 -14  -3    7.37    1.22
  -1  14   3    6.73    0.76
   1 -14  -2   -0.05    0.56
   1 -14  -2    1.70    1.30
  -1  14   2    1.64    0.43
   1 -14  -1   38.44    2.46
  -1  14   1   35.02    1.21
   1 -14   0    1.70    0.99
  -1  14   0    1.54    0.32
   1 -14   1    0.84    0.81
  -1  14  -1    0.49    0.31
   1 -14   2    5.63    1.44
   1 -14   3   15.20    2.86
   1 -14   4    1.87    1.15
   1 -14   5    3.36    1.35
   1 -14   6    1.34    1.17
   1 -14   7    8.12    1.94
   1 -14   8    0.95    1.16
   1 -13 -12    3.77    1.55
  -1  13  12    5.14    1.44
   1 -13 -11    0.39    0.97
  -1  13  11    1.06    0.89
   1 -13 -10   -0.11    1.15
  -1  13  10    4.53    1.07
   1 -13  -9   -0.02    1.00
  -1  13   9    3.44    0.92
   1 -13  -8    0.04    1.24
  -1  13   8   10.85    1.16
   1 -13  -7   -0.17    0.47
  -1  13   7    0.30    0.43
   1 -13  -6    1.77    0.74
   1 -13  -6    1.10    0.76
  -1  13   6    1.22    0.66
   1 -13  -5    3.92    0.97
   1 -13  -5    3.13    0.85
  -1  13   5    4.28    1.14
   1 -13  -4   40.67    2.24
   1 -13  -4   39.39    2.01
  -1  13   4   42.77    1.71
   1 -13  -3    0.95    0.63
   1 -13  -3    1.26    0.80
  -1  13   3    2.25    0.51
   1 -13  -2    1.08    0.69
   1 -13  -2    0.56    0.48
  -1  13   2    0.64    0.57
   1 -13  -1   30.05    1.97
   1 -13  -1   27.42    1.34
  -1  13   1   29.51    1.41
   1 -13   0    1.25    0.70
  -1  13   0    0.46    0.25
   1 -13   1    3.49    1.02
  -1  13  -1    2.36    0.41
   1 -13   2    0.57    0.37
  -1  13  -2   -0.04    0.08
  -1  13  -2    0.00    0.06
   1 -13   3    7.26    1.44
   1 -13   4    0.65    1.30
   1 -13   5    4.15    1.34
   1 -13   6   -0.21    1.19
   1 -13   7    5.63    1.60
   1 -13   8    1.41    1.87
   1 -13   9    4.29    1.59
   1 -13  10    7.05    2.87
   1 -12 -13    1.76    1.18
  -1  12  13    0.46    1.07
   1 -12 -12    3.67    1.38
  -1  12  12    1.95    1.94
   1 -12 -11   17.11    2.06
  -1  12  11   20.00    2.89
   1 -12 -10    2.50    1.08
  -1  12  10    1.68    1.57
   1 -12  -9   -0.34    0.71
  -1  12   9    0.24    0.66
   1 -12  -8   32.39    2.12
  -1  12   8   39.52    2.80
   1 -12  -7    1.43    0.73
  -1  12   7    1.29    0.68
   1 -12  -6    1.57    0.72
  -1  12   6    1.65    0.65
   1 -12  -5    0.36    0.36
  -1  12   5   -0.16    0.32
   1 -12  -4   16.73    1.24
  -1  12   4   20.61    1.55
   1 -12  -3    5.99    1.27
   1 -12  -3    7.62    1.09
  -1  12   3    7.46    0.70
   1 -12  -2    0.98    0.48
   1 -12  -2    0.64    1.11
  -1  12   2    1.27    0.39
   1 -12  -1    0.01    0.38
   1 -12  -1   -0.14    0.41
  -1  12   1    0.12    0.19
   1 -12   0    0.39    0.65
   1 -12   0    0.89    0.33
  -1  12   0    0.39    0.36
   1 -12   1    5.67    1.14
  -1  12  -1    5.74    0.49
   1 -12   2    5.90    1.17
  -1  12  -2    5.85    0.34
   1 -12   3    0.34    0.67
   1 -12   4    6.11    1.35
   1 -12   5    0.23    0.67
   1 -12   6    0.74    0.89
   1 -12   7    5.70    1.48
   1 -12   8   11.32    1.81
   1 -12   9   -0.27    0.80
   1 -12  10    0.01    0.48
   1 -12  11   14.99    2.21
   1 -11 -14   10.19    2.11
  -1  11  14    5.72    2.74
   1 -11 -13    1.99    1.35
  -1  11  13    2.47    1.23
   1 -11 -12   -0.10    0.61
  -1  11  12    0.16    0.54
   1 -11 -11   23.76    3.29
  -1  11  11   27.87    2.14
   1 -11 -10   -0.15    0.69
  -1  11  10   -0.41    0.64
   1 -11  -9    2.64    0.99
  -1  11   9    2.10    0.90
   1 -11  -8   30.22    1.98
  -1  11   8   34.34    1.88
   1 -11  -7   12.01    1.32
  -1  11   7   15.18    1.23
   1 -11  -6    0.44    0.57
  -1  11   6    1.10    0.82
   1 -11  -5    0.62    0.44
  -1  11   5    0.00    0.39
   1 -11  -4    2.90    0.67
  -1  11   4    3.60    0.59
   1 -11  -3    9.10    0.86
  -1  11   3   11.26    1.10
   1 -11  -2    5.88    0.71
   1 -11  -2    7.15    1.00
  -1  11   2    6.59    0.59
   1 -11  -1   27.09    1.64
   1 -11  -1   24.36    1.50
  -1  11   1   26.90    0.92
   1 -11   0   22.36    1.59
   1 -11   0   22.64    0.96
  -1  11   0   24.04    0.75
   1 -11   1   37.61    1.99
   1 -11   1   35.17    1.07
  -1  11  -1   33.28    0.80
   1 -11   2    6.79    1.09
  -1  11  -2    6.05    0.35
   1 -11   3    1.35    1.24
   1 -11   4   10.98    1.43
   1 -11   5    2.05    1.47
   1 -11   6    4.32    1.18
   1 -11   7   -0.23    0.67
   1 -11   8    7.24    1.47
   1 -11   9    2.36    1.15
   1 -11  10   -0.13    0.67
   1 -11  11    7.65    1.63
   1 -11  12    0.89    1.06
   1 -10 -15    0.53    1.13
  -1  10  15    0.43    1.54
   1 -10 -14   10.81    2.09
  -1  10  14   10.42    1.84
   1 -10 -13    3.99    1.56
  -1  10  13    6.04    1.44
   1 -10 -12    3.91    1.43
  -1  10  12    4.60    1.28
   1 -10 -11   14.55    1.83
  -1  10  11   14.63    1.60
   1 -10 -10   15.06    1.68
  -1  10  10   15.52    1.53
   1 -10  -9   -0.32    0.51
  -1  10   9    0.44    0.46
   1 -10  -8    0.11    0.71
  -1  10   8    0.13    0.44
   1 -10  -7    7.47    1.01
  -1  10   7    7.57    0.96
   1 -10  -6    1.32    0.63
  -1  10   6    1.72    0.59
   1 -10  -5   11.80    1.00
  -1  10   5   13.80    0.97
   1 -10  -4    0.73    0.42
  -1  10   4    0.26    0.59
   1 -10  -3   11.40    0.84
  -1  10   3   12.65    0.78
   1 -10  -2    0.89    0.38
  -1  10   2    1.15    0.34
   1 -10  -1    5.19    0.83
   1 -10  -1    2.88    0.75
  -1  10   1    4.46    0.41
   1 -10   0    2.42    0.40
   1 -10   0    2.99    0.79
  -1  10   0    2.99    0.30
   1 -10   1   99.71    3.29
   1 -10   1  103.50    2.30
  -1  10  -1   93.48    1.97
   1 -10   2    0.13    0.15
   1 -10   2    1.09    0.89
  -1  10  -2    0.80    0.12
   1 -10   3    0.18    0.51
   1 -10   4   93.44    3.42
   1 -10   5    1.00    0.73
   1 -10   6   -0.11    0.49
   1 -10   7    1.19    1.28
   1 -10   8    1.70    0.93
   1 -10   9   10.48    1.49
   1 -10  10   -0.55    0.78
   1 -10  11    3.41    1.21
   1 -10  12    3.82    1.35
   1 -10  13    2.81    1.28
   1  -9 -16    0.13    1.14
  -1   9  16    0.60    0.97
   1  -9 -15    0.99    1.10
  -1   9  15    0.26    1.00
   1  -9 -14    9.28    1.88
   1  -9 -14    7.11    0.73
  -1   9  14    9.15    1.65
   1  -9 -13    8.68    2.70
  -1   9  13    9.16    1.55
   1  -9 -12   -0.02    0.67
  -1   9  12    0.27    0.60
   1  -9 -11    4.05    1.25
  -1   9  11    4.30    1.09
   1  -9 -10   15.14    2.37
  -1   9  10   13.15    1.42
   1  -9  -9    0.90    0.70
  -1   9   9    0.56    0.98
   1  -9  -8   12.28    1.24
  -1   9   8   13.39    1.73
   1  -9  -7    0.40    0.52
  -1   9   7    0.59    0.75
   1  -9  -6    9.73    1.01
  -1   9   6   12.07    0.93
   1  -9  -5    1.43    0.79
  -1   9   5    1.25    0.47
   1  -9  -4   19.55    1.45
  -1   9   4   19.73    1.00
   1  -9  -3    4.91    0.59
  -1   9   3    5.28    0.54
   1  -9  -2   40.31    1.71
  -1   9   2   46.31    1.30
   1  -9  -1   10.34    0.88
  -1   9   1   11.28    0.54
   1  -9   0    0.39    0.51
   1  -9   0    0.70    0.25
  -1   9   0    0.78    0.20
   1  -9   1   14.96    1.62
   1  -9   1   13.78    0.72
  -1   9  -1   12.34    0.39
   1  -9   2   32.08    1.56
   1  -9   2   31.32    0.73
  -1   9  -2   28.89    0.70
   1  -9   3   39.96    1.85
   1  -9   4   27.38    2.34
   1  -9   5   51.81    2.38
   1  -9   6    1.73    0.79
   1  -9   7    0.04    0.40
   1  -9   8    4.68    1.08
   1  -9   9   14.24    2.24
   1  -9  10    1.70    0.93
   1  -9  11    2.41    1.01
   1  -9  12    4.26    1.23
   1  -9  13   13.21    1.72
   1  -9  14    0.00    0.61
   1  -8 -16    1.07    1.24
  -1   8  16    0.63    1.67
   1  -8 -15    4.05    1.64
  -1   8  15    4.59    1.46
   1  -8 -14    3.47    0.87
   1  -8 -14    2.86    2.27
  -1   8  14    3.47    1.28
   1  -8 -13    8.17    0.70
   1  -8 -13   10.20    1.73
  -1   8  13    9.15    1.50
   1  -8 -12    0.32    0.74
  -1   8  12    0.23    0.63
   1  -8 -11    2.41    1.62
  -1   8  11    2.42    1.39
   1  -8 -10    2.52    0.97
  -1   8  10    3.34    0.89
   1  -8  -9   10.51    1.27
  -1   8   9   12.09    1.20
   1  -8  -8    4.85    0.92
  -1   8   8    5.48    0.88
   1  -8  -7   -0.23    0.53
  -1   8   7    0.01    0.32
   1  -8  -6   65.08    2.26
  -1   8   6   70.40    2.23
   1  -8  -5   23.66    1.19
  -1   8   5   23.28    1.52
   1  -8  -4    1.23    0.44
  -1   8   4    1.34    0.41
   1  -8  -3    4.72    0.57
  -1   8   3    6.38    0.53
   1  -8  -2   49.48    1.80
  -1   8   2   53.78    1.38
   1  -8  -1    1.87    0.51
  -1   8   1    2.17    0.29
   1  -8   0    0.19    0.19
  -1   8   0    0.33    0.15
   1  -8   1   36.77    0.87
   1  -8   1   38.49    1.58
  -1   8  -1   34.25    0.84
   1  -8   2   72.32    1.44
   1  -8   2   70.46    2.34
   1  -8   3    5.79    1.26
   1  -8   4   11.02    1.08
   1  -8   5   28.69    1.61
   1  -8   6   36.91    2.54
   1  -8   7    1.84    0.76
   1  -8   8    0.20    0.51
   1  -8   9    4.03    1.48
   1  -8  10    4.40    1.05
   1  -8  11    3.19    1.00
   1  -8  12    2.16    1.49
   1  -8  13   12.68    1.58
   1  -8  14    0.00    0.34
   1  -8  15   -0.01    0.43
   1  -7 -17    4.94    3.03
   1  -7 -16    3.69    1.75
  -1   7  16    5.16    2.27
   1  -7 -15    3.92    1.58
   1  -7 -15    3.41    0.64
  -1   7  15    4.06    1.31
   1  -7 -14    6.39    1.04
   1  -7 -14    7.20    1.69
  -1   7  14    8.78    1.47
   1  -7 -13    0.18    0.28
   1  -7 -13    0.39    0.71
  -1   7  13   -0.02    0.59
   1  -7 -12    5.26    0.57
   1  -7 -12    6.83    1.38
  -1   7  12    3.93    1.72
   1  -7 -11    0.74    0.77
  -1   7  11    0.93    0.71
   1  -7 -10    0.62    0.67
  -1   7  10    0.61    0.63
   1  -7  -9   59.70    2.58
  -1   7   9   60.86    2.42
   1  -7  -8   32.65    1.72
  -1   7   8   35.43    1.68
   1  -7  -7    6.54    0.86
  -1   7   7    6.45    0.80
   1  -7  -6   17.47    1.10
  -1   7   6   18.43    1.04
  -1   7   5   61.55    1.85
   1  -7  -4    4.02    0.49
  -1   7   4    0.13    0.67
   1  -7  -3    6.12    0.53
  -1   7   3    5.67    0.48
   1  -7  -2   62.26    1.60
  -1   7   2   64.89    1.78
   1  -7  -1   34.86    1.01
  -1   7   1   35.37    1.09
   1  -7   0    8.67    0.58
  -1   7   0    8.85    0.34
   1  -7   1   21.76    0.55
  -1   7  -1   17.03    0.52
   1  -7   2   38.78    0.84
   1  -7   2   40.72    1.54
  -1   7  -2   36.58    0.74
   1  -7   3  105.54    1.51
   1  -7   3  103.60    2.95
   1  -7   4   -0.17    0.36
   1  -7   5   10.00    0.94
   1  -7   6   24.27    1.95
   1  -7   7   13.45    1.15
   1  -7   8    1.62    0.69
   1  -7   9    1.32    0.68
   1  -7  10    6.02    0.17
   1  -7  10    7.75    1.02
   1  -7  10    5.89    0.29
   1  -7  11    0.15    0.14
   1  -7  11   -0.01    0.38
   1  -7  11   -0.03    0.10
   1  -7  12   -0.03    0.14
   1  -7  12    0.00    0.67
   1  -7  12   -0.15    0.21
   1  -7  13   -0.01    0.35
   1  -7  14    0.00    0.34
   1  -7  15    0.00    0.56
   1  -6 -17    1.29    1.92
  -1   6  17    0.73    1.03
   1  -6 -16    9.90    1.44
   1  -6 -16    8.95    2.05
  -1   6  16   12.33    2.64
   1  -6 -15    0.52    0.62
   1  -6 -15    0.30    0.92
  -1   6  15    0.23    0.77
   1  -6 -14    0.29    0.34
   1  -6 -14    0.29    0.81
  -1   6  14    0.32    0.67
   1  -6 -13    9.69    1.60
   1  -6 -13    9.14    0.72
  -1   6  13    9.71    1.38
   1  -6 -12    4.26    0.53
   1  -6 -12    4.04    1.87
  -1   6  12    4.41    1.61
   1  -6 -11    0.52    0.55
   1  -6 -11    0.07    0.25
  -1   6  11    0.25    0.50
   1  -6 -10   11.01    1.33
  -1   6  10   12.24    1.23
   1  -6  -9   48.60    2.96
  -1   6   9   51.69    2.06
   1  -6  -8   18.82    1.29
  -1   6   8   18.45    1.18
   1  -6  -7    0.15    0.48
  -1   6   7    1.01    0.43
   1  -6  -6   12.50    0.91
  -1   6   6   12.62    0.84
   1  -6  -5   47.58    1.61
  -1   6   5   47.58    1.50
   1  -6  -4   70.16    1.95
  -1   6   4   70.54    1.84
   1  -6  -3  353.08    7.44
  -1   6   3  353.69    7.27
   1  -6  -2    2.05    0.34
  -1   6   2    2.73    0.31
   1  -6  -1   91.64    1.91
  -1   6   1   90.75    1.78
   1  -6   0   45.00    1.11
  -1   6   0   39.73    0.81
   1  -6   1   26.51    0.57
  -1   6  -1   23.76    0.58
   1  -6   2   14.16    0.86
   1  -6   2   13.23    0.30
  -1   6  -2   13.39    0.29
   1  -6   3   39.47    0.56
   1  -6   3   40.74    1.45
   1  -6   4    3.83    0.61
   1  -6   5   26.00    1.24
   1  -6   6    4.11    1.11
   1  -6   6    5.08    0.10
   1  -6   6    4.83    0.09
   1  -6   7    5.69    0.21
   1  -6   7    5.02    0.17
   1  -6   7    5.59    0.79
   1  -6   8    1.69    0.15
   1  -6   8    1.66    0.17
   1  -6   8    1.92    0.63
   1  -6   9    8.01    0.50
   1  -6   9    7.24    0.26
   1  -6   9    7.34    0.94
   1  -6  10    5.46    1.43
   1  -6  10    5.90    0.58
   1  -6  10    6.19    0.42
   1  -6  11    3.01    0.79
   1  -6  11    2.64    0.25
   1  -6  11    2.90    0.37
   1  -6  12    0.28    0.40
   1  -6  12    0.26    0.49
   1  -6  12    0.22    0.17
   1  -6  13    1.36    0.65
   1  -6  13    0.00    1.15
   1  -6  13    1.54    0.43
   1  -6  14    1.53    0.33
   1  -6  14    1.39    0.73
   1  -6  14    0.00    0.79
   1  -6  15    0.00    0.32
   1  -6  16    0.00    0.53
   1  -5 -17   -0.20    1.48
  -1   5  17    0.39    0.77
   1  -5 -16    7.46    1.95
   1  -5 -16    9.44    1.02
  -1   5  16   10.23    2.44
   1  -5 -15    2.44    1.41
   1  -5 -15    3.43    0.69
  -1   5  15    4.35    1.16
   1  -5 -14   -0.01    0.25
   1  -5 -14   -0.43    0.55
  -1   5  14    0.45    0.44
   1  -5 -13    2.00    1.10
   1  -5 -13    2.65    0.50
  -1   5  13    1.99    0.93
   1  -5 -12    4.65    1.76
   1  -5 -12    4.51    0.55
  -1   5  12    5.55    1.55
   1  -5 -11   59.42    2.06
   1  -5 -11   60.60    2.77
  -1   5  11   58.84    2.48
   1  -5 -10    9.56    1.22
  -1   5  10   10.59    1.09
   1  -5  -9   17.65    1.34
  -1   5   9   17.55    1.20
   1  -5  -8   60.23    2.20
  -1   5   8   56.54    1.97
   1  -5  -7    4.26    1.07
  -1   5   7    3.85    0.61
   1  -5  -6    0.95    0.48
  -1   5   6    1.64    0.43
   1  -5  -5  124.45    3.59
  -1   5   5  118.91    2.84
   1  -5  -4  264.17    5.71
  -1   5   4  257.54    5.44
   1  -5  -3   12.52    0.62
  -1   5   3   12.22    0.82
   1  -5  -2  293.27    5.72
  -1   5   2  275.13    5.32
   1  -5  -1   99.81    2.12
  -1   5   1   89.34    1.71
   1  -5   0    0.23    0.11
  -1   5   0    0.11    0.10
   1  -5   1    0.19    0.07
  -1   5  -1    0.08    0.07
   1  -5   2    0.38    0.06
  -1   5  -2    0.52    0.08
   1  -5   3   32.41    0.47
   1  -5   3   33.95    1.16
   1  -5   4    1.31    0.42
   1  -5   4    1.52    0.08
   1  -5   4    1.29    0.12
   1  -5   5    3.19    0.18
   1  -5   5    2.99    0.15
   1  -5   5    3.05    0.52
   1  -5   6    7.12    1.04
   1  -5   6    6.86    0.23
   1  -5   6    7.18    0.31
   1  -5   7   80.09    1.69
   1  -5   7   81.16    1.58
   1  -5   7   75.99    2.35
   1  -5   8    3.13    0.36
   1  -5   8    3.48    0.42
   1  -5   8    3.75    0.67
   1  -5   9   10.99    0.97
   1  -5   9   10.83    0.76
   1  -5   9   11.87    0.45
   1  -5  10    9.27    0.95
   1  -5  10    9.20    0.64
   1  -5  10    9.13    0.58
   1  -5  11   21.22    0.96
   1  -5  11   21.86    0.76
   1  -5  11   22.33    1.95
   1  -5  12    0.03    0.39
   1  -5  12    0.35    0.40
   1  -5  12    0.02    0.29
   1  -5  13    0.56    0.66
   1  -5  13    0.77    0.30
   1  -5  13    0.40    0.57
   1  -5  14    3.22    1.45
   1  -5  14    4.09    0.77
   1  -5  14    4.97    0.53
   1  -5  15    1.99    0.66
   1  -5  15    0.00    0.78
   1  -5  15    1.64    0.45
   1  -5  16    0.00    0.32
   1  -4 -17   -0.02    1.18
   1  -4 -17    0.23    0.63
  -1   4  17   -0.03    0.61
   1  -4 -16    5.26    1.51
   1  -4 -16    4.21    1.28
  -1   4  16    1.45    1.85
   1  -4 -15   19.05    1.25
   1  -4 -15   18.04    2.18
  -1   4  15   19.53    1.78
   1  -4 -14    6.57    1.46
   1  -4 -14    6.87    0.77
  -1   4  14    6.12    1.20
   1  -4 -13    4.76    0.66
   1  -4 -13    5.84    1.30
  -1   4  13    5.32    1.03
   1  -4 -12    6.56    1.21
   1  -4 -12    7.10    0.63
  -1   4  12    5.45    1.59
   1  -4 -11   78.29    2.08
   1  -4 -11   78.01    3.12
  -1   4  11   82.02    2.90
   1  -4 -10    1.03    1.00
   1  -4 -10    0.58    0.48
  -1   4  10    0.97    0.55
   1  -4  -9   17.95    1.31
  -1   4   9   19.53    1.18
   1  -4  -8   26.64    1.39
  -1   4   8   25.02    1.20
   1  -4  -7   31.29    1.39
  -1   4   7   29.48    1.22
   1  -4  -6   26.48    1.17
  -1   4   6   26.18    1.03
   1  -4  -5   17.34    0.84
  -1   4   5   16.42    0.77
   1  -4  -4   55.38    1.50
  -1   4   4   52.54    1.36
   1  -4  -3   65.86    1.54
  -1   4   3   63.04    1.74
   1  -4  -2  110.96    2.16
  -1   4   2  102.55    2.02
   1  -4  -1   52.89    1.22
  -1   4   1   52.52    1.03
   1  -4   0   12.52    0.34
  -1   4   0   12.74    0.33
   1  -4   1   42.18    0.76
  -1   4  -1   43.44    0.71
   1  -4   2   12.74    0.23
  -1   4  -2   13.62    0.34
   1  -4   3   15.76    1.04
   1  -4   3   13.77    0.28
  -1   4  -3   13.26    0.35
   1  -4   4   91.60    2.27
   1  -4   4   96.11    1.56
   1  -4   4   97.77    1.49
   1  -4   5   50.85    0.94
   1  -4   5   47.85    1.46
   1  -4   5   51.62    1.04
   1  -4   6    1.51    0.19
   1  -4   6    1.58    0.18
   1  -4   6    1.74    0.42
   1  -4   7   50.26    1.63
   1  -4   7   53.37    1.17
   1  -4   7   49.62    1.17
   1  -4   8  147.82    2.98
   1  -4   8  139.77    4.12
   1  -4   8  142.17    3.09
   1  -4   9    0.13    0.33
   1  -4   9    0.21    0.18
   1  -4  10    0.37    0.39
   1  -4  10    0.21    0.36
   1  -4  11   19.82    1.19
   1  -4  11   20.46    0.84
   1  -4  12    8.52    1.36
   1  -4  12    8.53    0.89
   1  -4  13    0.59    0.36
   1  -4  13    0.79    0.53
   1  -4  14    1.07    0.42
   1  -4  14    0.94    0.62
   1  -4  15    5.91    0.99
   1  -4  15    6.15    1.00
   1  -4  15    6.17    0.73
   1  -4  16    1.73    0.80
   1  -4  16    2.49    0.57
   1  -4  16    0.00    0.80
   1  -4  17    0.03    0.50
   1  -4  17    0.13    0.35
   1  -3 -17   -0.07    1.66
   1  -3 -17    1.05    0.64
  -1   3  17    0.01    0.84
   1  -3 -16    0.41    0.45
   1  -3 -16   -0.13    0.78
  -1   3  16   -0.03    0.61
   1  -3 -15   15.57    1.95
   1  -3 -15   15.07    1.20
  -1   3  15   16.65    1.62
   1  -3 -14   12.18    1.45
   1  -3 -14   10.49    1.64
  -1   3  14   12.88    1.35
   1  -3 -13    6.40    1.33
   1  -3 -13    8.70    1.16
  -1   3  13    6.87    1.06
   1  -3 -12    2.36    0.88
   1  -3 -12    2.46    0.52
  -1   3  12    1.80    1.14
   1  -3 -11   15.09    1.43
   1  -3 -11   18.43    0.89
  -1   3  11   16.36    1.28
   1  -3 -10   44.28    1.33
   1  -3 -10   40.31    2.66
  -1   3  10   44.33    1.81
   1  -3  -9    8.05    0.53
   1  -3  -9    8.35    0.93
  -1   3   9    8.74    0.82
   1  -3  -8   12.91    1.43
  -1   3   8   12.66    0.84
   1  -3  -7   11.60    0.85
  -1   3   7   10.39    0.71
   1  -3  -6   10.02    0.71
  -1   3   6    9.26    0.65
   1  -3  -5   13.14    0.71
  -1   3   5   11.78    0.63
   1  -3  -4    8.21    0.51
  -1   3   4    5.00    0.45
   1  -3  -3   22.98    0.72
  -1   3   3   21.08    0.91
   1  -3  -2   23.06    0.64
  -1   3   2   23.88    0.66
   1  -3  -1   79.87    1.42
  -1   3   1   80.41    1.43
   1  -3   0    0.77    0.12
  -1   3   0    0.74    0.13
   1  -3   1  200.76    3.16
  -1   3  -1  207.15    3.21
   1  -3   2   33.96    0.53
  -1   3  -2   35.21    0.67
   1  -3   3   80.63    1.87
   1  -3   3   84.79    1.32
   1  -3   4   45.95    1.25
   1  -3   4   46.10    0.87
   1  -3   4   46.77    0.88
   1  -3   5   96.43    1.97
   1  -3   5   94.08    1.78
   1  -3   5   94.38    2.21
   1  -3   6   12.06    0.45
   1  -3   6   11.44    0.66
   1  -3   7   20.16    0.89
   1  -3   7   20.03    0.69
   1  -3   8   98.20    2.24
   1  -3   8   96.26    2.48
  -1   3  -8   89.85    2.52
   1  -3   9   14.04    0.68
   1  -3   9   12.91    0.84
  -1   3  -9   12.79    0.91
   1  -3  10    6.09    0.67
   1  -3  10    6.68    0.79
  -1   3 -10    5.70    0.76
   1  -3  11   -0.25    0.54
   1  -3  11    0.40    0.29
   1  -3  12   23.21    1.24
   1  -3  12   23.91    1.08
   1  -3  13    1.38    0.73
   1  -3  13    1.17    0.55
   1  -3  14    6.99    1.34
   1  -3  14    7.05    0.79
   1  -3  15    0.77    0.59
   1  -3  15    1.13    0.81
   1  -3  16    3.13    0.72
   1  -3  17    0.06    0.56
   1  -2 -17   -0.10    1.10
   1  -2 -17    1.96    0.72
  -1   2  17   -0.01    0.85
   1  -2 -16   -0.01    0.69
   1  -2 -16    0.51    0.71
  -1   2  16    0.01    0.54
   1  -2 -15    8.22    0.95
   1  -2 -15    0.25    1.45
  -1   2  15    8.89    1.70
   1  -2 -14    9.65    1.45
   1  -2 -14    8.15    0.95
  -1   2  14    9.17    1.17
   1  -2 -13    0.14    0.54
   1  -2 -13   -0.08    0.56
  -1   2  13    0.34    0.43
   1  -2 -12    1.96    1.33
   1  -2 -12    2.92    0.56
  -1   2  12    2.27    0.70
   1  -2 -11    1.69    0.45
   1  -2 -11    0.98    0.70
  -1   2  11    1.50    0.93
   1  -2 -10   13.28    1.68
   1  -2 -10   14.06    0.77
  -1   2  10   15.14    1.02
   1  -2  -9    9.65    0.58
   1  -2  -9    8.17    0.91
  -1   2   9    9.61    0.79
   1  -2  -8    4.50    0.68
   1  -2  -8    4.90    0.42
  -1   2   8    5.20    0.57
   1  -2  -7   24.15    0.75
   1  -2  -7   23.50    1.09
  -1   2   7   23.87    0.95
   1  -2  -6   14.21    0.78
  -1   2   6   14.26    0.70
   1  -2  -5    1.13    0.49
  -1   2   5    0.94    0.29
   1  -2  -4   22.48    0.77
  -1   2   4   21.77    0.71
   1  -2  -3  172.78    3.26
  -1   2   3  163.14    3.07
   1  -2  -2    1.87    0.24
  -1   2   2    1.93    0.24
   1  -2  -1   30.60    0.75
  -1   2   1   29.22    0.59
   1  -2   0    3.81    0.16
  -1   2   0    3.74    0.16
   1  -2   1  683.72   11.92
  -1   2  -1  703.05   12.53
   1  -2   2  135.01    2.10
  -1   2  -2  134.49    2.16
   1  -2   3  329.71    6.38
   1  -2   3  344.74    5.93
   1  -2   4   30.90    0.71
   1  -2   4   30.91    0.86
   1  -2   4   29.40    0.69
   1  -2   5   19.63    0.95
   1  -2   5   19.06    0.59
   1  -2   6   38.58    1.07
   1  -2   6   37.73    0.99
  -1   2  -6   34.99    1.07
   1  -2   7    0.24    0.21
   1  -2   7    0.21    0.22
  -1   2  -7    0.26    0.25
   1  -2   8   51.45    1.43
   1  -2   8   51.57    1.44
  -1   2  -8   48.65    1.52
   1  -2   9   48.87    1.89
   1  -2   9   46.31    1.75
  -1   2  -9   44.64    1.52
   1  -2  10   10.25    1.03
   1  -2  10   10.03    0.75
  -1   2 -10   10.24    0.80
   1  -2  11    0.84    0.41
   1  -2  11    0.97    0.39
  -1   2 -11    0.85    0.46
   1  -2  12   25.06    1.23
   1  -2  12   23.71    1.12
  -1   2 -12   21.50    1.27
   1  -2  13   15.26    1.07
   1  -2  13   15.84    1.44
   1  -2  14    2.03    0.62
   1  -2  14    1.51    0.59
   1  -2  15    0.76    0.54
   1  -2  16    0.42    0.83
   1  -2  17    0.51    0.57
   1  -1 -17    6.60    1.03
   1  -1 -17    0.07    1.43
  -1   1  17    0.03    1.67
   1  -1 -16    0.20    0.73
   1  -1 -16   -0.17    0.35
  -1   1  16    0.17    0.37
   1  -1 -15    0.19    0.46
   1  -1 -15    0.41    0.51
  -1   1  15   -0.37    0.36
   1  -1 -14   12.58    2.15
   1  -1 -14    9.38    1.06
  -1   1  14   10.87    1.70
   1  -1 -13    8.88    1.20
   1  -1 -13    6.43    0.87
  -1   1  13    7.10    0.94
   1  -1 -12    0.85    0.67
   1  -1 -12    0.18    0.92
  -1   1  12    0.41    0.47
   1  -1 -11    4.48    0.63
   1  -1 -11    4.48    0.86
  -1   1  11    4.63    0.71
   1  -1 -10   70.57    3.08
   1  -1 -10   70.47    2.02
  -1   1  10   73.39    2.76
   1  -1  -9    0.13    0.21
   1  -1  -9    0.14    0.32
  -1   1   9    0.00    0.26
   1  -1  -8   27.55    1.22
   1  -1  -8   24.73    1.18
  -1   1   8   27.53    1.04
   1  -1  -7    2.35    0.33
   1  -1  -7    2.37    0.48
  -1   1   7    2.20    0.40
   1  -1  -6   52.01    1.21
   1  -1  -6   48.92    1.41
  -1   1   6   50.07    1.31
   1  -1  -5   19.79    0.76
  -1   1   5   21.51    0.71
   1  -1  -4    8.17    0.45
  -1   1   4    8.08    0.43
   1  -1  -3   41.17    0.94
  -1   1   3   43.34    0.96
   1  -1  -2  505.73    9.04
  -1   1   2  510.68    9.11
   1  -1  -1    2.55    0.15
  -1   1   1    2.58    0.22
   1  -1   1  152.78    2.32
  -1   1  -1  142.93    2.22
   1  -1   2  663.40   12.11
  -1   1  -2  659.72   12.15
   1  -1   3   26.53    0.63
   1  -1   3   26.42    0.65
   1  -1   4   59.42    1.26
   1  -1   4   60.98    1.43
   1  -1   5   22.02    0.64
   1  -1   5   21.18    0.69
  -1   1  -5   20.86    0.65
   1  -1   6    1.89    0.40
   1  -1   6    1.90    0.48
  -1   1  -6    1.77    0.44
   1  -1   7    0.78    0.47
   1  -1   7    0.86    0.25
  -1   1  -7    0.98    0.26
   1  -1   8    0.13    0.21
   1  -1   8    0.09    0.15
  -1   1  -8   -0.06    0.17
   1  -1   9   50.68    1.62
   1  -1   9   50.51    1.64
  -1   1  -9   49.34    1.44
   1  -1  10    9.37    0.86
   1  -1  10    8.94    0.75
  -1   1 -10    8.14    0.65
   1  -1  11    6.25    0.56
   1  -1  11    6.25    0.76
  -1   1 -11    5.83    1.01
   1  -1  12    6.06    0.80
   1  -1  12    6.14    0.61
  -1   1 -12    5.82    0.73
   1  -1  13   17.21    1.75
  -1   1 -13   15.60    1.10
   1  -1  14    4.37    0.78
  -1   1 -14    3.35    0.77
   1  -1  15    0.06    0.60
   1  -1  16   -0.16    0.47
   1  -1  17    1.48    1.20
   1  -1  18    0.29    0.61
   1   0 -17    0.04    0.82
   1   0 -17    1.02    0.67
  -1   0  17   -0.02    0.61
   1   0 -16    5.16    1.42
   1   0 -16   -0.09    1.14
  -1   0  16    3.72    1.33
   1   0 -15    1.87    0.99
   1   0 -15    2.61    0.83
  -1   0  15    2.69    0.77
   1   0 -14    1.91    1.13
   1   0 -14    2.21    0.89
  -1   0  14    1.99    0.70
   1   0 -13    8.38    1.11
   1   0 -13    7.22    0.93
  -1   0  13    7.72    1.32
   1   0 -12   -0.04    0.39
   1   0 -12   -0.03    0.32
  -1   0  12   -0.09    0.30
   1   0 -11    3.63    0.78
   1   0 -11    3.78    0.67
  -1   0  11    4.92    0.64
   1   0 -10    5.66    0.80
   1   0 -10    6.92    0.68
  -1   0  10    6.48    0.67
   1   0  -9   80.10    2.58
   1   0  -9   77.38    2.36
  -1   0   9   77.94    2.09
   1   0  -8    1.59    0.37
   1   0  -8    1.60    0.67
  -1   0   8    1.05    0.54
   1   0  -7    2.95    0.46
   1   0  -7    3.33    0.37
  -1   0   7    0.86    0.55
   1   0  -6   43.36    1.24
   1   0  -6   45.41    1.43
  -1   0   6   44.57    1.37
   1   0  -5   50.88    1.17
   1   0  -5   47.52    1.21
  -1   0   5   50.35    1.14
   1   0  -4  434.64    8.20
   1   0  -4  397.96    7.66
  -1   0   4  425.56    7.88
   1   0  -3  147.69    2.64
   1   0  -3  140.89    2.48
  -1   0   3  138.60    2.42
   1   0  -2  675.30   12.20
  -1   0   2  686.16   12.31
   1   0   2  245.02    4.23
   1   0   3  280.95    4.58
   1   0   4  147.11    2.89
   1   0   4  149.75    2.47
  -1   0  -4  139.95    2.39
   1   0   5    2.30    0.51
   1   0   5    2.45    0.20
  -1   0  -5    2.32    0.21
   1   0   6   12.23    0.88
   1   0   6   12.53    0.42
  -1   0  -6   11.72    0.43
   1   0   7    0.53    0.17
   1   0   7    0.26    0.46
  -1   0  -7   -0.06    0.29
  -1   0  -7    0.83    0.29
   1   0   8    0.37    0.18
   1   0   8    0.62    0.33
  -1   0  -8    0.36    0.33
  -1   0  -8    0.15    0.32
   1   0   9   26.37    1.18
   1   0   9   26.27    0.80
  -1   0  -9   26.41    1.16
   1   0  10   42.94    2.20
   1   0  10   40.68    1.13
  -1   0 -10   39.81    1.24
   1   0  11    0.23    0.21
   1   0  11    0.01    0.36
  -1   0 -11    0.07    0.25
   1   0  12   29.63    2.01
  -1   0 -12   26.04    1.11
   1   0  13   30.23    1.66
  -1   0 -13   30.03    1.79
   1   0  14    0.23    0.48
  -1   0 -14    0.28    0.39
   1   0  15    1.15    0.70
   1   0  16    0.33    0.57
   1   0  17    0.50    0.67
   1   0  18    0.02    0.41
   1   1 -17    1.56    0.89
  -1  -1  17    1.06    0.72
   1   1 -16   -0.14    0.98
   1   1 -16    1.66    0.87
  -1  -1  16    2.24    0.70
   1   1 -15   -0.44    0.89
   1   1 -15   -0.09    0.83
  -1  -1  15   -0.08    0.66
   1   1 -14    1.17    0.61
   1   1 -14    0.36    0.64
  -1  -1  14    0.50    0.50
   1   1 -13    5.01    1.43
   1   1 -13    5.12    1.37
  -1  -1  13    4.57    0.71
   1   1 -12    2.97    0.73
   1   1 -12    3.61    0.78
  -1  -1  12    3.15    0.60
   1   1 -11    4.42    0.75
   1   1 -11    5.36    1.20
  -1  -1  11    4.95    0.94
   1   1 -10    2.62    0.63
   1   1 -10    3.46    0.60
  -1  -1  10    3.42    0.49
   1   1  -9   63.94    1.99
   1   1  -9   61.26    1.90
  -1  -1   9   62.42    1.70
   1   1  -8  116.67    2.88
   1   1  -8  111.70    2.81
  -1  -1   8  116.10    2.58
   1   1  -7    0.31    0.28
   1   1  -7    0.34    0.28
  -1  -1   7    0.50    0.21
   1   1  -6    2.65    0.38
   1   1  -6    2.88    0.36
  -1  -1   6    2.69    0.29
  -1  -1   6    3.08    0.35
   1   1  -5   17.45    0.66
   1   1  -5   15.78    0.58
  -1  -1   5   17.40    0.64
  -1  -1   5   17.38    0.67
   1   1  -4   13.45    0.46
   1   1  -4   13.72    0.54
  -1  -1   4   14.60    0.53
  -1  -1   4   13.43    0.41
   1   1  -3  126.62    2.13
   1   1  -3  124.24    2.59
  -1  -1   3  122.62    2.19
  -1  -1   3  127.63    2.38
   1   1  -2   45.09    0.74
   1   1  -2   44.47    0.92
  -1  -1   2   44.30    0.73
  -1  -1   2   47.04    0.94
   1   1  -1  432.60    7.56
   1   1  -1  444.45    7.26
  -1  -1   1  440.80    7.68
  -1  -1   1  452.45    7.45
   1   1   3    4.90    0.36
   1   1   3    4.92    0.13
   1   1   4    1.21    0.08
   1   1   4    1.35    0.29
  -1  -1  -4    0.97    0.12
   1   1   5    0.00    0.06
   1   1   5   -0.24    0.16
  -1  -1  -5    0.18    0.17
  -1  -1  -5   -0.06    0.06
   1   1   6   62.21    1.08
   1   1   6   58.34    1.61
  -1  -1  -6   62.10    1.70
  -1  -1  -6   62.29    1.26
   1   1   7   42.61    1.82
   1   1   7   43.64    0.86
  -1  -1  -7   42.98    1.42
  -1  -1  -7   43.89    1.09
   1   1   8    9.42    0.38
   1   1   8   11.54    0.78
  -1  -1  -8   10.84    0.81
  -1  -1  -8   11.63    0.61
   1   1   9    2.25    0.56
  -1  -1  -9    3.22    0.59
  -1  -1  -9    2.27    0.31
   1   1  10   19.86    1.22
  -1  -1 -10   21.13    1.25
  -1  -1 -10   18.52    0.73
   1   1  11   12.30    1.05
  -1  -1 -11   12.26    0.92
  -1  -1 -11    8.62    1.06
   1   1  12   23.68    2.13
  -1  -1 -12   21.24    0.94
   1   1  13    7.06    0.99
  -1  -1 -13    6.04    0.62
   1   1  14   19.22    2.14
  -1  -1 -14   15.34    0.98
   1   1  15    1.37    0.63
  -1  -1 -15    0.11    0.43
   1   1  16    0.48    0.68
   1   1  17    0.00    0.34
   1   1  18    0.01    0.41
   1   2 -17    0.00    0.70
  -1  -2  17    0.40    0.49
   1   2 -16   10.21    2.28
  -1  -2  16   11.00    1.62
   1   2 -15   -0.03    0.58
   1   2 -15    0.35    0.61
  -1  -2  15    0.38    0.42
   1   2 -14    0.42    0.34
   1   2 -14   -0.36    0.49
  -1  -2  14   -0.10    0.23
   1   2 -13    0.58    0.57
   1   2 -13    0.36    0.52
  -1  -2  13    0.51    0.59
   1   2 -12   21.48    1.44
   1   2 -12   21.91    1.86
  -1  -2  12   21.00    1.03
   1   2 -11    1.08    0.50
   1   2 -11    1.35    0.88
  -1  -2  11    1.14    0.39
   1   2 -10    2.81    0.67
   1   2 -10    3.05    0.55
  -1  -2  10    3.19    0.43
   1   2  -9   55.87    1.71
   1   2  -9   55.49    1.90
  -1  -2   9   54.25    1.69
  -1  -2   9   55.38    1.44
   1   2  -8  110.48    2.94
   1   2  -8  111.71    2.70
  -1  -2   8  110.00    2.73
  -1  -2   8  107.88    2.32
   1   2  -7   18.93    0.90
   1   2  -7   18.98    0.74
  -1  -2   7   17.91    0.59
  -1  -2   7   17.58    1.10
   1   2  -6    0.44    0.19
   1   2  -6   -0.07    0.44
  -1  -2   6    0.30    0.15
  -1  -2   6    0.34    0.25
   1   2  -5   64.64    1.62
   1   2  -5   63.85    1.32
  -1  -2   5   66.38    1.84
  -1  -2   5   62.15    1.15
   1   2  -4   11.20    0.56
   1   2  -4   11.15    0.50
  -1  -2   4   11.08    0.31
  -1  -2   4   12.83    0.55
   1   2  -3  285.81    5.51
   1   2  -3  267.40    4.41
  -1  -2   3  285.74    5.41
  -1  -2   3  277.84    4.61
   1   2  -2  423.01    8.08
   1   2  -2  431.41    7.15
  -1  -2   2  429.72    8.08
  -1  -2   2  436.39    7.22
   1   2  -1    1.40    0.21
   1   2  -1    1.41    0.11
  -1  -2   1    1.81    0.12
  -1  -2   1    1.67    0.21
   1   2   0  528.01    9.44
   1   2   0  542.98    9.54
  -1  -2   0  524.49    9.31
  -1  -2   0  539.70    9.69
   1   2   1   64.99    1.00
  -1  -2  -1   64.57    1.06
   1   2   2   49.69    1.09
   1   2   2   50.96    0.71
  -1  -2  -2   50.83    0.69
   1   2   3  180.70    3.57
   1   2   4   28.80    0.93
  -1  -2  -4   26.28    0.92
   1   2   5  285.92    6.09
  -1  -2  -5  295.52    4.58
  -1  -2  -5  297.95    6.35
   1   2   6    1.10    0.37
  -1  -2  -6    1.17    0.11
  -1  -2  -6    0.79    0.40
   1   2   7    1.47    0.45
  -1  -2  -7    1.76    0.47
  -1  -2  -7    1.76    0.15
   1   2   8   35.63    1.43
  -1  -2  -8   35.13    0.91
  -1  -2  -8   36.44    1.50
   1   2   9   13.06    0.97
  -1  -2  -9   13.59    0.48
  -1  -2  -9   13.77    1.06
   1   2  10   19.41    1.27
  -1  -2 -10   20.21    0.89
  -1  -2 -10   20.95    1.33
   1   2  11   49.79    2.10
  -1  -2 -11   49.67    1.32
  -1  -2 -11   52.59    2.29
   1   2  12   -0.25    0.33
  -1  -2 -12    0.44    0.36
  -1  -2 -12    0.00    0.16
   1   2  13    5.96    1.02
  -1  -2 -13    5.54    0.55
   1   2  14   49.31    2.42
  -1  -2 -14   45.40    1.93
   1   2  15    6.03    1.05
  -1  -2 -15    3.27    0.62
   1   2  16   10.44    1.48
   1   2  17   -0.08    0.54
   1   2  18   -0.02    0.51
   1   3 -17    0.00    1.06
  -1  -3  17    0.26    0.67
   1   3 -16    0.01    1.31
  -1  -3  16    7.45    0.83
   1   3 -15   11.94    1.55
  -1  -3  15   13.02    0.99
   1   3 -14   -0.05    0.46
   1   3 -14   -0.24    0.56
  -1  -3  14   -0.25    0.50
   1   3 -13    2.27    1.08
   1   3 -13    3.07    0.85
  -1  -3  13    1.88    0.49
   1   3 -12   11.89    1.85
   1   3 -12   12.89    1.02
  -1  -3  12   12.14    0.74
   1   3 -11   12.17    1.18
   1   3 -11   13.55    1.34
  -1  -3  11   12.80    1.00
  -1  -3  11   12.67    0.68
   1   3 -10    2.56    0.69
   1   3 -10    2.55    0.49
  -1  -3  10    2.01    0.57
  -1  -3  10    2.04    0.36
   1   3  -9    0.07    0.20
   1   3  -9    0.42    0.47
  -1  -3   9   -0.15    0.15
  -1  -3   9   -0.09    0.25
   1   3  -8  116.00    3.19
   1   3  -8  118.98    3.06
  -1  -3   8  116.89    2.97
  -1  -3   8  112.61    2.27
   1   3  -7   18.36    0.99
   1   3  -7   17.84    0.66
  -1  -3   7   17.47    0.52
  -1  -3   7   18.48    1.23
   1   3  -6   40.59    0.98
   1   3  -6   39.37    1.34
  -1  -3   6   40.60    1.26
  -1  -3   6   38.19    0.93
   1   3  -5   -0.21    0.20
   1   3  -5    0.09    0.15
  -1  -3   5   -0.02    0.11
  -1  -3   5   -0.21    0.27
   1   3  -4    2.10    0.15
   1   3  -4    2.06    0.56
  -1  -3   4    1.72    0.13
  -1  -3   4    2.59    0.35
   1   3  -3    0.81    0.09
   1   3  -3    0.39    0.28
  -1  -3   3    0.69    0.09
  -1  -3   3    0.92    0.27
   1   3  -2    0.36    0.16
   1   3  -2   -0.01    0.07
  -1  -3   2    0.04    0.08
  -1  -3   2    0.19    0.16
   1   3  -1   47.96    1.11
   1   3  -1   49.03    0.84
  -1  -3   1   47.45    0.81
  -1  -3   1   48.73    1.10
   1   3   0  132.02    2.21
   1   3   0  129.51    2.36
  -1  -3   0  123.21    2.48
   1   3   1   17.69    0.46
  -1  -3  -1   17.35    0.44
   1   3   2   16.45    0.58
  -1  -3  -2   16.27    0.44
   1   3   3    9.47    0.51
  -1  -3  -3    8.35    0.23
   1   3   4   48.35    1.36
  -1  -3  -4   50.55    1.41
   1   3   5    5.27    0.54
  -1  -3  -5    5.13    0.57
   1   3   6   41.11    1.42
  -1  -3  -6   41.29    0.60
  -1  -3  -6   42.12    1.90
   1   3   7    1.42    0.49
  -1  -3  -7    1.59    0.17
  -1  -3  -7    1.12    0.76
   1   3   8    3.94    0.66
  -1  -3  -8    3.64    0.19
  -1  -3  -8    4.15    1.06
   1   3   9   28.18    1.45
  -1  -3  -9   29.94    1.54
  -1  -3  -9   28.88    0.81
   1   3  10    6.10    0.89
  -1  -3 -10    6.66    0.94
  -1  -3 -10    5.35    0.47
   1   3  11   53.01    2.25
  -1  -3 -11   55.52    2.44
  -1  -3 -11   53.94    1.27
   1   3  12   19.87    1.56
  -1  -3 -12   18.87    1.69
  -1  -3 -12   20.40    0.75
   1   3  13   13.24    1.42
  -1  -3 -13   13.63    1.61
  -1  -3 -13   14.95    0.95
   1   3  14   25.48    1.84
  -1  -3 -14   21.93    0.91
   1   3  15   15.58    1.63
  -1  -3 -15   14.54    1.22
   1   3  16    1.12    0.89
   1   3  17    0.01    0.65
   1   3  18   -0.01    0.49
   1   4 -16    0.00    1.08
  -1  -4  16    0.19    0.35
   1   4 -15   10.37    1.56
  -1  -4  15   11.01    0.85
   1   4 -14    2.03    0.93
  -1  -4  14    1.63    0.69
   1   4 -13    0.01    0.41
   1   4 -13    0.09    0.88
  -1  -4  13   -0.30    0.26
   1   4 -12    2.16    0.62
   1   4 -12    3.70    0.90
  -1  -4  12    2.67    0.41
  -1  -4  12    3.41    0.75
   1   4 -11   14.99    1.31
   1   4 -11   13.88    0.89
  -1  -4  11   14.46    1.12
  -1  -4  11   14.02    0.64
   1   4 -10    0.53    0.26
   1   4 -10   -0.07    0.68
  -1  -4  10   -0.04    0.18
  -1  -4  10    0.23    0.36
   1   4  -9   26.77    1.49
   1   4  -9   25.29    0.95
  -1  -4   9   24.16    0.71
  -1  -4   9   25.85    1.25
   1   4  -8    0.29    0.39
   1   4  -8    0.07    0.29
  -1  -4   8    0.08    0.32
  -1  -4   8    0.22    0.13
   1   4  -7  152.40    4.04
   1   4  -7  153.31    3.08
  -1  -4   7  152.76    3.74
  -1  -4   7  146.98    2.63
   1   4  -6   12.36    0.43
   1   4  -6   11.86    0.87
  -1  -4   6   11.82    0.76
  -1  -4   6   12.58    0.44
   1   4  -5    0.37    0.31
   1   4  -5    0.25    0.16
  -1  -4   5    0.45    0.27
  -1  -4   5    0.25    0.08
   1   4  -4    0.81    0.15
   1   4  -4    0.59    0.37
  -1  -4   4    1.17    0.34
  -1  -4   4    1.03    0.09
   1   4  -3    3.28    0.15
   1   4  -3    4.10    0.47
  -1  -4   3    3.83    0.13
  -1  -4   3    3.99    0.66
   1   4  -2    8.12    0.16
   1   4  -2    7.29    0.54
  -1  -4   2    8.61    0.51
  -1  -4   2    8.25    0.27
   1   4  -1    0.35    0.24
   1   4  -1    0.63    0.14
  -1  -4   1    0.31    0.23
   1   4   0  111.56    2.24
   1   4   0  112.55    1.97
   1   4   0  113.11    2.15
  -1  -4   0  111.40    2.19
   1   4   1   16.22    0.52
   1   4   1   15.81    0.51
  -1  -4  -1   15.70    0.65
   1   4   2    2.98    0.32
  -1  -4  -2    2.74    0.32
   1   4   3   22.20    0.77
  -1  -4  -3   21.26    0.82
  -1  -4  -3   20.36    0.44
   1   4   4  117.46    3.07
  -1  -4  -4  115.92    2.75
   1   4   5   50.94    1.55
  -1  -4  -5   48.45    2.04
   1   4   6   44.95    1.56
  -1  -4  -6   44.32    2.06
   1   4   7   68.65    2.20
  -1  -4  -7   71.95    1.09
  -1  -4  -7   69.25    2.23
   1   4   8   92.15    3.36
  -1  -4  -8   95.51    1.63
  -1  -4  -8   92.92    3.53
   1   4   9   -0.03    0.38
  -1  -4  -9    0.14    0.09
  -1  -4  -9   -0.24    0.64
   1   4  10    3.61    1.27
  -1  -4 -10    3.14    0.23
  -1  -4 -10    3.41    0.85
   1   4  11    8.27    1.13
  -1  -4 -11    8.81    0.39
  -1  -4 -11    8.36    1.25
   1   4  12   40.49    2.19
  -1  -4 -12   40.91    2.38
  -1  -4 -12   40.89    1.04
   1   4  13    8.63    1.26
  -1  -4 -13    7.69    1.49
  -1  -4 -13    8.57    0.49
   1   4  14    1.61    0.80
  -1  -4 -14    0.80    0.28
   1   4  15   -0.03    0.73
  -1  -4 -15   -0.04    0.30
   1   4  16   -0.04    0.54
   1   4  17    0.03    0.85
   1   4  18    0.00    0.37
   1   5 -16    0.00    0.34
   1   5 -15    0.01    0.94
  -1  -5  15    1.02    0.39
   1   5 -14    1.16    0.75
  -1  -5  14    0.12    0.49
   1   5 -13    0.17    0.41
  -1  -5  13   -0.03    0.26
  -1  -5  13    0.00    0.36
   1   5 -12    1.81    0.90
  -1  -5  12    2.02    0.34
  -1  -5  12    1.83    0.74
   1   5 -11    5.03    0.58
   1   5 -11    4.32    1.57
  -1  -5  11    4.36    0.86
  -1  -5  11    4.66    0.39
   1   5 -10    5.57    0.52
   1   5 -10    5.36    1.00
  -1  -5  10    6.95    0.86
  -1  -5  10    5.00    0.52
   1   5  -9    6.30    0.98
   1   5  -9    6.21    0.67
  -1  -5   9    5.92    0.82
  -1  -5   9    6.01    0.48
   1   5  -8    8.85    0.97
   1   5  -8    8.37    0.44
  -1  -5   8    8.00    0.83
  -1  -5   8    8.08    0.32
   1   5  -7   22.28    1.29
   1   5  -7   21.69    0.60
  -1  -5   7   20.35    1.12
  -1  -5   7   22.02    0.49
   1   5  -6   46.05    1.02
   1   5  -6   45.42    1.75
  -1  -5   6   45.34    2.05
  -1  -5   6   47.07    0.91
   1   5  -5    6.99    0.28
   1   5  -5    7.47    0.73
  -1  -5   5    7.19    0.24
  -1  -5   5    7.75    0.69
   1   5  -4   11.95    0.80
   1   5  -4   11.25    0.26
  -1  -5   4   10.50    1.08
  -1  -5   4   11.74    0.27
   1   5  -3   22.92    0.30
   1   5  -3   22.87    1.00
  -1  -5   3   23.38    0.95
   1   5  -2    1.93    0.63
   1   5  -2    1.90    0.08
  -1  -5   2    2.21    0.39
   1   5  -1  165.06    3.58
   1   5  -1  172.88    2.86
   1   5  -1  169.54    2.80
  -1  -5   1  167.37    3.85
   1   5   0  242.22    4.41
   1   5   0  241.48    4.96
   1   5   0  237.70    4.27
  -1  -5   0  229.78    4.63
   1   5   1  145.22    2.98
  -1  -5  -1  144.77    2.86
   1   5   2   12.63    0.55
  -1  -5  -2   11.68    0.44
   1   5   3    0.53    0.24
  -1  -5  -3    0.45    0.27
  -1  -5  -3    0.29    0.14
   1   5   4  157.59    3.60
  -1  -5  -4  160.76    3.74
  -1  -5  -4  158.02    2.81
   1   5   5  260.38    6.42
  -1  -5  -5  270.46    6.75
   1   5   6   55.43    1.85
  -1  -5  -6   56.76    2.41
   1   5   7   -0.39    0.30
  -1  -5  -7    0.27    0.30
   1   5   8   80.88    2.61
  -1  -5  -8   83.34    1.34
  -1  -5  -8   80.86    3.41
   1   5   9   -0.16    0.51
  -1  -5  -9    0.61    0.84
  -1  -5  -9    0.49    0.15
   1   5  10    4.73    0.91
  -1  -5 -10    4.26    0.31
  -1  -5 -10    3.79    0.99
   1   5  11    0.26    0.65
  -1  -5 -11    0.68    0.15
  -1  -5 -11    0.51    0.72
   1   5  12   38.53    3.06
  -1  -5 -12   35.87    1.03
  -1  -5 -12   36.28    2.40
   1   5  13    1.25    0.84
  -1  -5 -13    1.33    0.99
  -1  -5 -13    1.40    0.36
   1   5  14    2.50    0.99
  -1  -5 -14    0.83    1.16
  -1  -5 -14    2.00    0.45
   1   5  15    0.14    0.77
  -1  -5 -15    0.51    0.35
   1   5  16   -0.07    0.61
   1   5  17    0.02    0.85
   1   5  18    0.89    1.07
   1   6 -15    0.00    0.36
   1   6 -14    0.01    0.40
  -1  -6  14    0.00    0.33
   1   6 -13    1.88    1.65
  -1  -6  13    2.48    0.35
  -1  -6  13    0.00    0.90
   1   6 -12    1.36    0.91
  -1  -6  12    1.27    0.79
  -1  -6  12    1.82    0.29
   1   6 -11    0.02    0.53
  -1  -6  11    0.17    0.45
  -1  -6  11    0.13    0.15
   1   6 -10   13.43    1.41
  -1  -6  10   13.25    0.62
  -1  -6  10   13.85    1.22
   1   6  -9   25.74    1.69
  -1  -6   9   24.01    1.45
  -1  -6   9   25.10    0.60
   1   6  -8    2.15    0.77
  -1  -6   8    2.18    0.68
  -1  -6   8    2.36    0.17
   1   6  -7   22.83    2.03
  -1  -6   7   22.70    0.45
  -1  -6   7   22.36    1.26
   1   6  -6   30.94    2.16
  -1  -6   6   33.02    0.52
  -1  -6   6   34.58    1.48
   1   6  -5    2.68    0.66
  -1  -6   5    3.81    0.61
   1   6  -4   -0.28    0.32
  -1  -6   4    0.48    0.29
   1   6  -3    4.35    0.59
  -1  -6   3    4.95    0.87
   1   6  -2    8.43    0.99
   1   6  -2    8.46    0.21
  -1  -6   2    8.61    0.64
   1   6  -1    0.09    0.11
   1   6  -1   -0.10    0.21
   1   6  -1    0.04    0.08
  -1  -6   1    0.09    0.19
   1   6   0    0.02    0.14
  -1  -6   0    0.05    0.17
   1   6   1  415.74    8.15
  -1  -6  -1  395.61    8.18
   1   6   2  200.50    4.14
  -1  -6  -2  195.74    3.93
   1   6   3   19.42    1.09
  -1  -6  -3   19.27    0.86
  -1  -6  -3   18.60    0.81
   1   6   4    0.10    0.26
  -1  -6  -4    0.04    0.28
  -1  -6  -4    0.27    0.21
   1   6   5  122.29    3.17
  -1  -6  -5  129.44    3.37
   1   6   6   10.14    1.27
  -1  -6  -6    9.44    1.30
   1   6   7    0.99    0.52
  -1  -6  -7    1.35    0.84
   1   6   8    9.24    1.00
  -1  -6  -8   10.98    1.62
   1   6   9   32.50    2.46
  -1  -6  -9   31.47    0.62
  -1  -6  -9   33.22    2.59
   1   6  10    0.30    0.24
  -1  -6 -10   -0.03    0.07
  -1  -6 -10    0.06    0.26
   1   6  11    1.94    0.75
  -1  -6 -11    1.03    0.82
  -1  -6 -11    0.91    0.22
   1   6  12    3.99    1.57
  -1  -6 -12    3.81    1.21
  -1  -6 -12    3.66    0.35
   1   6  13    6.31    1.29
  -1  -6 -13    7.62    1.52
  -1  -6 -13    6.43    0.31
   1   6  14    1.05    0.84
  -1  -6 -14    0.62    0.27
  -1  -6 -14    0.65    0.98
   1   6  15   -0.01    0.42
   1   6  16   11.89    1.84
   1   6  17   -0.13    1.18
  -1  -7  15    0.00    0.38
   1   7 -14   -0.01    0.44
  -1  -7  14    0.00    0.37
   1   7 -13    2.64    1.23
  -1  -7  13    3.59    1.61
   1   7 -12    0.76    0.81
  -1  -7  12    0.45    0.28
  -1  -7  12    0.95    0.67
   1   7 -11    1.00    0.89
  -1  -7  11    1.05    0.18
  -1  -7  11    1.60    0.74
   1   7 -10   23.20    2.69
  -1  -7  10   21.68    1.57
  -1  -7  10   22.42    0.53
   1   7  -9   11.53    1.40
  -1  -7   9   13.00    1.20
  -1  -7   9   12.19    0.37
   1   7  -8    9.51    1.24
  -1  -7   8   11.70    1.12
   1   7  -7    2.67    0.79
  -1  -7   7    2.48    0.74
   1   7  -6   64.00    2.40
  -1  -7   6   65.58    2.31
   1   7  -5   17.50    1.73
  -1  -7   5   17.64    1.12
   1   7  -4    4.23    0.71
  -1  -7   4    3.64    0.64
   1   7  -3   13.69    1.01
  -1  -7   3   13.94    0.91
   1   7  -2    1.62    0.12
   1   7  -2    2.02    0.51
  -1  -7   2    1.55    0.46
   1   7  -1   43.47    0.94
   1   7  -1   43.94    1.02
  -1  -7   1   45.05    1.43
   1   7   0    9.24    0.38
  -1  -7   0    9.69    0.92
   1   7   1    0.51    0.21
  -1  -7  -1    0.44    0.28
   1   7   2  161.32    3.50
  -1  -7  -2  160.60    3.50
   1   7   3    3.48    0.47
  -1  -7  -3    4.14    0.37
   1   7   4   -0.02    0.28
  -1  -7  -4    0.17    0.19
  -1  -7  -4   -0.04    0.11
   1   7   5   29.36    1.24
  -1  -7  -5   31.65    1.39
  -1  -7  -5   31.68    0.86
   1   7   6   14.92    1.03
  -1  -7  -6   17.29    1.12
   1   7   7    4.65    0.77
  -1  -7  -7    4.31    0.81
   1   7   8   22.71    2.06
  -1  -7  -8   22.48    1.53
   1   7   9    5.89    1.00
  -1  -7  -9    6.61    1.08
   1   7  10    8.52    1.25
  -1  -7 -10   10.99    1.39
  -1  -7 -10    9.62    0.31
   1   7  11    0.54    0.32
  -1  -7 -11   -0.03    0.36
  -1  -7 -11   -0.03    0.09
   1   7  12    4.30    1.11
  -1  -7 -12    4.31    1.32
  -1  -7 -12    4.37    0.21
   1   7  13   24.00    2.01
  -1  -7 -13   21.53    0.61
  -1  -7 -13   26.59    2.30
   1   7  14    0.00    0.91
  -1  -7 -14    1.79    0.67
  -1  -7 -14    0.01    0.10
   1   7  15    0.00    0.40
   1   7  16    0.12    0.73
   1   7  17    8.73    2.80
  -1  -8  14    0.00    0.36
  -1  -8  13    2.58    1.13
   1   8 -12   -0.45    0.62
  -1  -8  12    0.42    0.51
   1   8 -11    1.14    1.03
  -1  -8  11    1.68    0.87
   1   8 -10   18.90    1.89
  -1  -8  10   19.13    1.61
   1   8  -9   16.36    1.74
  -1  -8   9   19.15    1.52
   1   8  -8    0.29    0.49
  -1  -8   8   -0.07    0.42
   1   8  -7   14.93    1.53
  -1  -8   7   17.96    1.37
   1   8  -6   53.87    2.43
  -1  -8   6   53.08    2.19
   1   8  -5   62.36    2.51
  -1  -8   5   62.36    2.36
   1   8  -4    2.03    0.70
  -1  -8   4    1.73    0.63
  -1  -8   3    7.29    0.84
   1   8  -2    1.46    0.09
  -1  -8   2    1.69    0.51
   1   8  -1   78.40    1.71
   1   8  -1   82.87    1.62
  -1  -8   1   78.53    2.30
   1   8   0    0.98    0.29
  -1  -8   0    0.80    0.60
   1   8   1    6.90    0.44
  -1  -8  -1    7.57    0.62
   1   8   2   32.28    1.03
  -1  -8  -2   32.41    1.47
   1   8   3    1.53    0.39
  -1  -8  -3    1.76    0.35
   1   8   4   29.96    1.20
  -1  -8  -4   31.39    1.27
  -1  -8  -4   28.87    1.30
   1   8   5    0.65    0.43
  -1  -8  -5    0.85    0.26
  -1  -8  -5    0.42    0.46
   1   8   6   47.64    1.87
  -1  -8  -6   51.04    1.58
  -1  -8  -6   50.66    2.04
   1   8   7    3.60    0.73
  -1  -8  -7    3.34    0.34
  -1  -8  -7    3.11    0.82
   1   8   8    3.48    0.81
  -1  -8  -8    3.51    0.92
   1   8   9   -0.12    0.51
  -1  -8  -9   -0.31    0.56
   1   8  10   -0.19    0.53
  -1  -8 -10   -0.13    0.58
   1   8  11    0.08    0.48
  -1  -8 -11    0.58    0.54
  -1  -8 -11    0.03    0.14
   1   8  12    2.04    1.00
  -1  -8 -12    2.06    1.16
   1   8  13    6.47    1.49
  -1  -8 -13    7.66    1.71
   1   8  14   18.48    2.02
   1   8  15   -0.08    0.65
   1   8  16    0.03    0.59
   1   8  17    6.13    1.77
  -1  -9  13    0.96    0.95
  -1  -9  12    2.05    1.63
  -1  -9  11    0.09    0.54
  -1  -9  10    5.74    1.83
  -1  -9   9    1.26    0.79
  -1  -9   8   33.28    2.75
  -1  -9   7    6.48    1.10
  -1  -9   6    0.49    0.91
  -1  -9   5   78.62    2.91
  -1  -9   4    1.64    1.04
  -1  -9   3    3.27    0.75
   1   9  -2    3.52    0.12
  -1  -9   2    3.77    0.70
   1   9  -1   16.16    0.42
   1   9  -1   15.30    0.66
  -1  -9   1   15.87    1.03
   1   9   0    2.20    0.31
   1   9   0    2.47    0.25
  -1  -9   0    2.48    0.54
   1   9   1   28.44    0.89
  -1  -9  -1   29.16    1.22
   1   9   2   23.54    0.91
  -1  -9  -2   25.60    1.08
   1   9   3   38.37    1.31
  -1  -9  -3   39.54    1.33
   1   9   4    7.03    0.67
  -1  -9  -4    5.89    0.56
   1   9   5   25.96    1.26
  -1  -9  -5   25.30    1.39
  -1  -9  -5   26.42    1.31
   1   9   6   21.87    1.27
  -1  -9  -6   20.94    1.40
  -1  -9  -6   19.85    0.83
   1   9   7   82.76    2.82
  -1  -9  -7   84.86    2.35
  -1  -9  -7   85.89    3.18
   1   9   8    4.07    0.92
  -1  -9  -8    3.97    0.60
  -1  -9  -8    4.82    1.01
   1   9   9   40.49    2.96
  -1  -9  -9   36.60    1.05
  -1  -9  -9   39.00    2.29
   1   9  10    4.38    1.07
  -1  -9 -10    4.72    0.36
  -1  -9 -10    4.42    1.24
   1   9  11    2.61    1.08
  -1  -9 -11    3.44    0.30
  -1  -9 -11    2.81    1.23
   1   9  12    0.10    0.57
  -1  -9 -12    0.18    0.17
  -1  -9 -12    0.35    0.64
  -1  -9 -12    0.01    0.14
   1   9  13    0.29    1.27
  -1  -9 -13    0.82    1.01
   1   9  14    7.84    1.61
   1   9  15    0.06    0.66
   1   9  16   -0.05    1.06
  -1 -10  13    0.69    0.98
  -1 -10  12    2.48    1.16
  -1 -10  11    0.47    0.78
  -1 -10  10    6.66    1.36
  -1 -10   9    0.84    0.79
  -1 -10   8   18.63    2.52
  -1 -10   7    7.70    1.25
  -1 -10   6   16.21    2.25
  -1 -10   5    1.25    0.74
  -1 -10   4   21.41    2.23
  -1 -10   3    2.78    0.81
   1  10  -2    3.37    0.16
  -1 -10   2    2.48    0.78
   1  10  -1    3.77    0.31
   1  10  -1    4.05    0.29
  -1 -10   1    4.27    0.76
   1  10   0   12.05    0.85
   1  10   0   12.64    0.48
  -1 -10   0   12.56    1.00
   1  10   1   33.75    1.01
  -1 -10  -1   36.17    2.03
   1  10   2    0.41    0.28
  -1 -10  -2    0.56    0.39
   1  10   3   69.10    2.35
  -1 -10  -3   70.26    2.63
   1  10   4    0.32    0.60
  -1 -10  -4    0.48    0.34
   1  10   5   22.06    1.77
  -1 -10  -5   23.27    1.04
   1  10   6    0.98    0.82
  -1 -10  -6    0.98    0.52
  -1 -10  -6    0.12    0.57
   1  10   7   33.17    2.43
  -1 -10  -7   38.53    1.27
  -1 -10  -7   39.05    2.04
   1  10   8   11.41    1.24
  -1 -10  -8   13.05    1.42
  -1 -10  -8   12.44    0.67
   1  10   9    0.09    0.53
  -1 -10  -9    0.22    0.21
  -1 -10  -9    0.10    0.60
   1  10  10    7.04    1.22
  -1 -10 -10    6.14    0.45
  -1 -10 -10    5.66    1.37
   1  10  11    8.62    1.42
  -1 -10 -11    8.79    1.58
  -1 -10 -11    7.52    0.45
   1  10  12    0.34    0.88
  -1 -10 -12    0.36    0.20
  -1 -10 -12    0.00    0.11
  -1 -10 -12    0.36    0.69
   1  10  13    1.43    1.02
   1  10  14   11.36    1.89
   1  10  15    7.75    1.83
   1  10  16    0.17    0.85
  -1 -11  12    1.55    1.18
  -1 -11  11   -0.50    0.87
  -1 -11  10    0.27    0.74
  -1 -11   9    0.46    0.78
  -1 -11   8    7.00    2.16
  -1 -11   7   19.17    1.83
  -1 -11   6    0.24    0.96
  -1 -11   5    2.75    0.97
  -1 -11   4   18.20    1.55
  -1 -11   3    4.39    1.00
  -1 -11   2   10.06    1.16
   1  11  -1    0.83    0.14
   1  11  -1    0.85    0.29
  -1 -11   1    0.86    0.93
   1  11   0   16.25    0.76
   1  11   0   15.36    0.73
  -1 -11   0   17.39    1.25
   1  11   1    0.04    0.17
  -1 -11  -1    0.22    0.34
   1  11   2   30.53    1.09
  -1 -11  -2   31.59    1.50
   1  11   3    6.95    1.03
  -1 -11  -3    9.05    0.86
   1  11   4    9.31    0.84
  -1 -11  -4   10.60    1.22
   1  11   5   -0.02    0.39
  -1 -11  -5    0.41    0.33
   1  11   6    4.20    0.78
  -1 -11  -6    3.88    0.59
   1  11   7   16.97    1.33
  -1 -11  -7   16.52    0.92
   1  11   8   19.39    1.48
  -1 -11  -8   16.38    0.88
   1  11   9   -0.02    0.53
  -1 -11  -9    0.20    0.25
   1  11  10    3.31    1.71
  -1 -11 -10    3.47    0.45
   1  11  11   29.93    2.13
  -1 -11 -11   28.56    0.99
   1  11  12    1.55    1.02
   1  11  13    4.82    1.45
   1  11  14    0.52    0.96
   1  11  15    5.82    1.71
  -1 -12  11    1.58    1.19
  -1 -12  10   -0.31    0.83
  -1 -12   9    1.40    1.06
  -1 -12   8    0.78    1.41
  -1 -12   7    8.61    1.56
  -1 -12   6    2.60    1.08
  -1 -12   5    1.75    0.96
  -1 -12   4   11.92    1.50
  -1 -12   3   22.35    1.77
  -1 -12   2    0.70    0.70
   1  12  -1    0.24    0.17
   1  12  -1    0.05    0.24
  -1 -12   1    0.90    0.52
   1  12   0    7.48    0.57
   1  12   0    7.41    0.79
  -1 -12   0    7.99    1.08
   1  12   1   10.58    0.85
   1  12   1   12.36    0.82
  -1 -12  -1   11.32    1.13
   1  12   2   40.32    1.29
  -1 -12  -2   42.22    2.50
   1  12   3    0.14    0.18
  -1 -12  -3   -0.28    0.24
   1  12   4    9.30    0.81
  -1 -12  -4    9.09    0.92
   1  12   5    5.02    0.76
  -1 -12  -5    5.76    0.75
   1  12   6   17.59    1.25
  -1 -12  -6   18.43    1.55
   1  12   7    1.19    0.62
  -1 -12  -7    0.58    0.69
   1  12   8   27.93    1.80
  -1 -12  -8   31.07    1.77
   1  12   9   10.17    1.33
  -1 -12  -9    9.92    1.12
   1  12  10    1.69    0.90
  -1 -12 -10    1.39    0.65
   1  12  11    5.36    1.26
  -1 -12 -11    4.63    0.52
   1  12  12   11.49    1.74
   1  12  13   -0.08    0.66
   1  12  14   -0.15    0.78
  -1 -13   9   -0.01    0.48
  -1 -13   8    0.31    1.25
  -1 -13   7    5.96    1.48
  -1 -13   6   -0.26    0.73
  -1 -13   5    3.15    1.18
  -1 -13   4    1.22    0.93
  -1 -13   3   26.82    2.96
  -1 -13   2    2.61    1.03
   1  13  -1    0.04    0.12
   1  13  -1    0.08    0.16
  -1 -13   1   -0.21    0.43
   1  13   0    1.37    0.25
   1  13   0    1.42    0.53
  -1 -13   0    0.64    1.19
   1  13   1    3.05    0.84
   1  13   1    3.19    0.61
  -1 -13  -1    3.09    0.89
   1  13   2    7.43    0.89
  -1 -13  -2    7.59    1.05
   1  13   3   14.14    0.90
  -1 -13  -3   14.59    1.25
   1  13   4   20.77    1.16
  -1 -13  -4   21.33    1.99
   1  13   5   12.69    1.53
  -1 -13  -5   12.01    1.10
   1  13   6    0.66    0.52
  -1 -13  -6    0.38    0.47
   1  13   7    2.11    0.77
  -1 -13  -7    2.09    0.61
   1  13   8   11.74    1.36
  -1 -13  -8   11.97    0.97
   1  13   9   16.90    1.65
  -1 -13  -9   15.21    1.03
   1  13  10   -0.34    0.55
  -1 -13 -10    0.19    0.27
   1  13  11    0.67    1.36
   1  13  12    1.25    1.02
   1  13  13   -0.27    0.82
  -1 -14   8    0.25    0.82
  -1 -14   7    2.27    1.27
  -1 -14   6    9.21    1.76
  -1 -14   5    2.40    1.84
  -1 -14   4    2.12    1.13
  -1 -14   3   11.24    1.63
  -1 -14   2   10.92    2.45
   1  14  -1    0.00    0.09
   1  14  -1    0.05    0.07
  -1 -14   1   -0.18    0.44
   1  14   0    0.04    0.15
   1  14   0    0.19    0.22
  -1 -14   0    0.38    0.53
   1  14   1    3.43    0.66
   1  14   1    5.11    0.65
  -1 -14  -1    4.24    1.61
   1  14   2   15.28    1.16
   1  14   2   16.01    1.16
  -1 -14  -2   16.72    1.51
   1  14   3    2.07    0.52
  -1 -14  -3    2.04    0.80
   1  14   4    0.18    0.54
  -1 -14  -4   -0.36    0.45
   1  14   5   16.04    1.18
  -1 -14  -5   15.07    1.29
   1  14   6    0.11    0.40
  -1 -14  -6    0.04    0.59
   1  14   7    7.69    1.09
  -1 -14  -7    6.63    1.43
   1  14   8    0.07    0.58
  -1 -14  -8    0.60    0.67
   1  14   9   21.74    1.79
  -1 -14  -9   18.75    1.76
   1  14  10    0.02    0.39
  -1 -14 -10    0.00    0.21
   1  14  11   -0.01    0.45
   1  14  12    1.40    1.11
  -1 -15   6    1.24    1.17
  -1 -15   5    8.75    1.78
  -1 -15   4    7.28    1.64
  -1 -15   3   -0.09    0.65
  -1 -15   2    9.52    1.62
  -1 -15   1    3.21    1.22
  -1 -15   0    2.17    1.03
   1  15   1    0.10    0.29
   1  15   1    0.10    0.32
  -1 -15  -1    0.10    0.55
   1  15   2   19.95    1.92
   1  15   2   20.08    1.35
  -1 -15  -2   22.86    2.59
   1  15   3    2.66    0.56
  -1 -15  -3    1.89    0.91
   1  15   4    1.72    0.59
  -1 -15  -4    2.25    0.82
   1  15   5    4.22    0.83
  -1 -15  -5    4.74    0.97
   1  15   6    4.02    1.34
  -1 -15  -6    4.19    0.92
   1  15   7    4.60    1.51
  -1 -15  -7    3.73    0.87
   1  15   8    3.28    1.04
  -1 -15  -8    3.57    0.82
   1  15   9    0.05    1.07
  -1 -15  -9    3.70    0.73
   1  15  10    0.01    0.42
  -1 -16   4    0.69    1.58
  -1 -16   3    1.25    1.12
  -1 -16   2    2.37    1.27
  -1 -16   1    5.34    1.46
  -1 -16   0    0.99    0.98
  -1 -16  -1   -0.68    0.86
  -1 -16  -2    1.54    0.98
   1  16   3    1.66    0.52
   1  16   3    1.05    1.16
  -1 -16  -3    1.31    0.94
   1  16   4    0.41    0.46
  -1 -16  -4    0.59    1.07
   1  16   5   -0.12    0.66
  -1 -16  -5    0.67    0.86
   1  16   6    0.49    0.57
  -1 -16  -6    0.22    0.94
   1  16   7    1.21    0.82
  -1 -16  -7    2.18    1.21
   1  16   8    0.00    0.58
  -1 -16  -8    0.53    0.77
  -1 -17   0    1.29    1.10
  -1 -17  -1    0.79    1.53
  -1 -17  -2    0.17    0.70
  -1 -17  -3    0.85    0.91
   1  17   4    0.49    0.50
   1  17   4    0.65    0.71
  -1 -17  -4    0.40    0.78
  -1 -17  -5    2.17    1.01
   2 -16  -6    0.01    1.69
   2 -16  -6    2.51    1.79
  -2  16   6    2.73    0.92
   2 -16  -5   -0.01    0.53
   2 -16  -5    0.65    0.61
  -2  16   5   -0.53    0.70
   2 -16  -4    4.47    1.25
   2 -16  -4    7.29    1.57
  -2  16   4    7.50    1.01
   2 -16  -3    2.69    0.96
   2 -16  -3    3.30    1.34
  -2  16   3    3.30    0.76
   2 -16  -2    4.76    2.04
  -2  16   2    2.57    0.63
   2 -16  -1   -0.32    0.86
   2 -16   0    8.88    1.86
   2 -16   1    0.76    1.68
   2 -16   2   -0.49    1.02
   2 -16   3    5.04    1.79
   2 -15  -9    0.02    0.35
  -2  15   9   -0.02    0.34
   2 -15  -8   -0.03    0.51
  -2  15   8   -0.07    0.50
   2 -15  -7    9.01    1.66
  -2  15   7   10.87    1.43
   2 -15  -6    0.00    0.59
   2 -15  -6   -0.09    0.71
  -2  15   6    0.63    0.57
   2 -15  -5   -0.01    0.39
   2 -15  -5    0.19    0.47
  -2  15   5   -0.14    0.34
   2 -15  -4    8.84    1.36
   2 -15  -4   13.17    1.73
  -2  15   4   12.64    1.70
   2 -15  -3   10.57    1.24
   2 -15  -3   11.92    1.70
  -2  15   3   11.23    1.01
   2 -15  -2    0.03    0.86
   2 -15  -2    0.75    0.88
  -2  15   2    0.68    0.43
   2 -15  -1    2.76    1.19
   2 -15  -1    2.07    0.68
  -2  15   1    1.95    0.74
   2 -15   0   18.08    2.13
   2 -15   1    3.24    1.38
   2 -15   2    1.73    1.88
   2 -15   3    1.79    1.28
   2 -15   4    5.99    1.77
   2 -15   5    1.68    1.32
   2 -15   6   -0.23    0.93
   2 -14 -10   -0.12    0.96
  -2  14  10   -0.04    0.63
   2 -14  -9    0.11    0.78
  -2  14   9   -0.04    0.78
   2 -14  -8    0.08    0.46
  -2  14   8   -0.08    0.69
   2 -14  -7   10.96    1.47
  -2  14   7   14.76    1.49
   2 -14  -6   -0.03    0.90
  -2  14   6    4.67    0.86
   2 -14  -5    0.05    0.42
  -2  14   5    0.13    0.63
   2 -14  -4    0.74    0.70
   2 -14  -4    0.29    0.52
  -2  14   4    0.09    0.46
   2 -14  -3   24.76    2.10
   2 -14  -3   20.37    2.14
  -2  14   3   23.17    1.28
   2 -14  -2    7.79    2.15
   2 -14  -2    5.84    0.89
  -2  14   2    5.41    1.07
   2 -14  -1    3.97    1.14
   2 -14  -1    2.70    0.68
  -2  14   1    3.09    0.52
   2 -14   0    0.36    0.82
   2 -14   0    0.62    0.40
  -2  14   0    0.50    0.30
   2 -14   1   23.22    2.21
  -2  14  -1   21.20    1.15
   2 -14   2    1.48    1.08
   2 -14   3    0.20    1.19
   2 -14   4    2.92    1.37
   2 -14   5    1.19    1.19
   2 -14   6   -0.52    1.02
   2 -14   7    0.43    1.02
   2 -14   8    3.45    1.63
   2 -13 -12    0.66    2.05
  -2  13  12    2.59    1.27
   2 -13 -11    0.37    0.86
  -2  13  11    0.58    0.86
   2 -13 -10    0.07    1.29
  -2  13  10    7.19    1.28
   2 -13  -9    0.08    0.51
  -2  13   9   -0.01    0.51
   2 -13  -8   -0.07    0.66
  -2  13   8   -0.58    0.64
   2 -13  -7   -0.02    0.58
  -2  13   7    1.04    0.90
   2 -13  -6   33.56    2.83
  -2  13   6   42.58    2.06
   2 -13  -5    0.59    1.07
  -2  13   5    2.19    0.70
   2 -13  -4    0.85    0.77
  -2  13   4    0.24    0.76
   2 -13  -3    8.04    1.58
  -2  13   3   11.64    0.93
   2 -13  -2   17.30    1.20
   2 -13  -2   17.64    1.79
  -2  13   2   18.28    0.99
   2 -13  -1    0.49    0.70
   2 -13  -1    0.17    0.38
  -2  13   1    0.42    0.30
   2 -13   0   10.24    1.44
   2 -13   0    7.53    1.13
  -2  13   0    9.14    0.85
   2 -13   1    1.80    0.66
   2 -13   1    2.86    1.03
  -2  13  -1    1.86    0.56
   2 -13   2    0.18    1.00
  -2  13  -2    0.14    0.24
   2 -13   3    2.65    1.16
   2 -13   4    3.11    1.94
   2 -13   5    1.19    1.07
   2 -13   6    3.74    2.15
   2 -13   7    0.94    1.07
   2 -13   8    1.56    1.93
   2 -13   9    9.34    2.00
   2 -12 -13   14.09    2.25
  -2  12  13   13.41    2.11
   2 -12 -12    0.25    0.91
  -2  12  12    0.54    0.86
   2 -12 -11    0.07    0.73
  -2  12  11    0.38    0.72
   2 -12 -10    3.85    1.29
  -2  12  10    4.86    1.22
   2 -12  -9    8.73    2.14
  -2  12   9   11.54    1.48
   2 -12  -8   -0.08    0.53
  -2  12   8    0.45    0.54
   2 -12  -7    1.26    0.75
  -2  12   7    1.56    0.75
   2 -12  -6   11.99    1.19
  -2  12   6   12.27    1.22
   2 -12  -5    7.31    0.97
  -2  12   5    8.43    0.95
   2 -12  -4    1.03    0.54
  -2  12   4    0.91    0.51
   2 -12  -3    1.26    0.53
  -2  12   3    1.47    0.50
   2 -12  -2   11.27    0.95
  -2  12   2   12.23    1.16
   2 -12  -1    2.23    0.53
   2 -12  -1    2.97    0.96
  -2  12   1    2.95    0.68
   2 -12   0    2.95    1.01
   2 -12   0    3.14    0.73
  -2  12   0    2.60    0.38
   2 -12   1   12.24    0.76
   2 -12   1   14.86    1.53
  -2  12  -1   13.20    0.61
   2 -12   2   21.71    1.84
   2 -12   2   18.92    0.78
  -2  12  -2   20.54    0.91
   2 -12   3   21.59    1.72
  -2  12  -3   11.96    0.37
   2 -12   4    0.38    0.75
   2 -12   5    1.25    0.96
   2 -12   6    6.10    1.44
   2 -12   7    2.63    1.21
   2 -12   8    0.18    0.75
   2 -12   9   12.28    1.96
   2 -12  10    5.69    2.57
   2 -11 -14    1.21    1.21
  -2  11  14    0.68    1.15
   2 -11 -13   14.31    2.03
  -2  11  13    5.59    2.89
   2 -11 -12    3.80    1.41
  -2  11  12    4.33    2.07
   2 -11 -11    0.90    1.62
  -2  11  11    2.72    1.62
   2 -11 -10    0.01    0.44
  -2  11  10    0.07    0.71
   2 -11  -9   13.97    1.51
  -2  11   9   16.41    2.34
   2 -11  -8    3.04    0.97
  -2  11   8    5.31    1.47
   2 -11  -7    0.86    0.90
  -2  11   7    0.46    0.57
   2 -11  -6    0.15    0.54
  -2  11   6    1.00    0.53
   2 -11  -5    0.14    0.39
  -2  11   5   -0.49    0.38
   2 -11  -4   -0.08    0.35
  -2  11   4   -0.25    0.34
   2 -11  -3    1.38    0.49
  -2  11   3    1.65    0.48
   2 -11  -2    0.46    0.38
  -2  11   2    0.90    0.36
   2 -11  -1   21.62    1.09
  -2  11   1   24.28    0.92
   2 -11   0    9.05    0.67
  -2  11   0    9.88    0.77
   2 -11   1    0.13    0.25
   2 -11   1   -0.09    0.16
  -2  11  -1    0.02    0.13
   2 -11   2    1.88    0.84
   2 -11   2    1.88    0.43
  -2  11  -2    1.47    0.26
   2 -11   3   13.01    0.46
   2 -11   3   15.06    1.52
  -2  11  -3   13.61    0.58
   2 -11   4   11.88    1.48
   2 -11   5    5.64    1.26
   2 -11   6    7.63    1.39
   2 -11   7    4.99    2.04
   2 -11   8   -0.01    0.42
   2 -11   9    1.63    1.13
   2 -11  10   19.75    2.17
   2 -11  11   -0.26    0.79
   2 -10 -14   -1.15    1.09
  -2  10  14    0.42    1.57
   2 -10 -13    0.12    0.78
  -2  10  13   -0.39    0.71
   2 -10 -12   23.14    3.38
  -2  10  12   30.66    2.32
   2 -10 -11   -0.17    0.67
  -2  10  11   -0.35    0.67
   2 -10 -10    7.55    1.30
  -2  10  10    6.99    1.28
   2 -10  -9    0.65    1.10
  -2  10   9    0.85    0.71
   2 -10  -8    5.09    1.02
  -2  10   8    6.37    1.03
   2 -10  -7   -0.08    0.43
  -2  10   7   -0.39    0.69
   2 -10  -6    1.58    0.61
  -2  10   6    1.11    0.60
   2 -10  -5    5.14    1.17
  -2  10   5    5.06    0.77
   2 -10  -4    9.22    0.86
  -2  10   4   11.26    1.28
   2 -10  -3    0.14    0.33
  -2  10   3    0.32    0.31
   2 -10  -2    4.72    0.60
  -2  10   2    5.88    0.56
   2 -10  -1   26.66    1.07
  -2  10   1   29.37    0.98
   2 -10   0   13.97    0.70
  -2  10   0   14.32    0.61
   2 -10   1    9.89    0.57
  -2  10  -1   10.39    0.48
   2 -10   2   74.49    2.98
   2 -10   2   68.93    1.87
  -2  10  -2   69.12    1.74
   2 -10   3   11.09    0.56
   2 -10   3   12.81    1.28
  -2  10  -3   11.00    0.41
   2 -10   4    3.43    1.53
   2 -10   4    3.43    0.17
   2 -10   5   12.69    1.46
   2 -10   6    2.90    1.02
   2 -10   7    8.06    1.33
   2 -10   8    0.21    0.63
   2 -10   9    0.67    1.28
   2 -10  10   14.92    1.82
   2 -10  11    5.31    1.40
   2 -10  12    2.38    1.19
   2 -10  13    0.21    0.75
   2  -9 -15    3.51    0.80
   2  -9 -15    4.93    1.70
  -2   9  15    5.64    2.37
   2  -9 -14    4.18    1.56
   2  -9 -14    3.09    0.76
  -2   9  14    5.24    1.39
   2  -9 -13    8.80    2.97
  -2   9  13   14.68    1.84
   2  -9 -12    7.88    1.54
  -2   9  12    8.92    1.50
   2  -9 -11    1.98    1.01
  -2   9  11    2.05    0.98
   2  -9 -10    7.41    2.03
  -2   9  10   10.46    1.33
   2  -9  -9    1.43    0.76
  -2   9   9    1.26    0.76
   2  -9  -8    9.31    1.18
  -2   9   8   12.69    1.17
   2  -9  -7    1.23    1.00
  -2   9   7    1.50    0.65
   2  -9  -6    0.97    0.56
  -2   9   6    1.18    0.56
   2  -9  -5    7.64    0.82
  -2   9   5    7.46    0.82
   2  -9  -4   50.44    1.81
  -2   9   4   61.29    1.90
   2  -9  -3    1.36    0.65
  -2   9   3    1.52    0.43
   2  -9  -2    1.81    0.40
  -2   9   2    1.62    0.59
   2  -9  -1   27.86    1.00
  -2   9   1   29.76    1.23
   2  -9   0   22.92    0.82
  -2   9   0   22.48    0.73
   2  -9   1    0.26    0.17
  -2   9  -1    0.09    0.16
   2  -9   2   24.06    1.51
   2  -9   2   19.56    0.62
  -2   9  -2   18.49    0.59
   2  -9   3  245.57    6.78
   2  -9   3  224.66    4.38
  -2   9  -3  223.81    4.52
   2  -9   4   32.20    0.71
   2  -9   4   33.97    1.85
   2  -9   5   -0.58    0.64
   2  -9   6    2.74    1.39
   2  -9   7   -0.17    0.53
   2  -9   8    3.49    1.03
   2  -9   9    1.30    0.85
   2  -9  10    3.89    1.17
   2  -9  11   12.79    1.63
   2  -9  12   -0.17    0.65
   2  -9  13    0.00    0.30
   2  -9  14    0.00    0.36
   2  -8 -16    0.33    1.74
  -2   8  16    0.54    0.99
   2  -8 -15    2.91    0.75
   2  -8 -15    3.97    1.55
  -2   8  15    4.08    2.10
   2  -8 -14    2.62    1.09
   2  -8 -14    3.38    1.44
  -2   8  14    3.97    1.27
   2  -8 -13    0.08    0.36
   2  -8 -13    0.32    0.69
  -2   8  13    0.27    0.65
   2  -8 -12    0.03    0.54
  -2   8  12    0.07    0.51
   2  -8 -11    6.94    2.07
  -2   8  11    7.41    1.26
   2  -8 -10    2.13    0.88
  -2   8  10    1.91    0.85
   2  -8  -9    6.13    1.12
  -2   8   9    8.16    1.07
   2  -8  -8   21.27    2.09
  -2   8   8   20.56    1.45
   2  -8  -7   10.64    1.07
  -2   8   7   11.31    1.04
   2  -8  -6    0.20    0.31
  -2   8   6   -0.09    0.30
   2  -8  -5    1.43    0.50
  -2   8   5    1.85    0.81
   2  -8  -4   30.25    1.23
  -2   8   4   32.83    1.26
   2  -8  -3    5.24    0.57
  -2   8   3    7.02    0.87
   2  -8  -2   -0.11    0.15
  -2   8   2    0.09    0.15
   2  -8  -1    3.11    0.38
  -2   8   1    3.46    0.37
   2  -8   0   51.82    1.51
  -2   8   0   49.22    1.16
   2  -8   1   31.36    0.98
  -2   8  -1   29.61    0.97
   2  -8   2   13.68    0.44
  -2   8  -2   12.57    0.45
   2  -8   3    4.58    0.22
   2  -8   3    5.51    0.88
  -2   8  -3    5.00    0.41
   2  -8   4  105.93    3.38
   2  -8   4  100.88    1.75
  -2   8  -4  102.27    1.89
   2  -8   5    0.44    0.74
   2  -8   5    0.24    0.05
   2  -8   6    0.74    0.61
   2  -8   7    5.40    1.01
   2  -8   8    2.06    0.81
   2  -8   9    1.40    0.78
   2  -8  10    3.27    1.00
   2  -8  11   10.97    1.44
   2  -8  12    7.31    1.32
   2  -8  13    0.00    0.28
   2  -8  14    0.00    0.37
   2  -8  15   12.39    1.70
   2  -7 -16    1.21    1.13
   2  -7 -16    0.39    0.93
  -2   7  16    0.35    1.53
   2  -7 -15    0.41    0.82
   2  -7 -15    0.97    1.10
  -2   7  15    1.04    0.98
   2  -7 -14    3.22    0.69
   2  -7 -14    1.70    2.03
  -2   7  14    3.88    1.20
   2  -7 -13    1.76    1.01
   2  -7 -13    1.10    0.52
  -2   7  13    1.20    0.91
   2  -7 -12    8.06    1.47
  -2   7  12    8.99    1.35
   2  -7 -11   46.89    2.57
  -2   7  11   51.12    2.48
   2  -7 -10   12.30    1.46
  -2   7  10   14.86    1.33
   2  -7  -9    4.19    1.50
  -2   7   9    5.32    0.94
   2  -7  -8   17.46    1.36
  -2   7   8   20.37    1.33
   2  -7  -7   49.28    2.02
  -2   7   7   53.43    1.98
   2  -7  -6    5.62    0.77
  -2   7   6    7.04    0.77
   2  -7  -5   -0.24    0.33
  -2   7   5    0.67    0.32
   2  -7  -4    5.02    0.58
  -2   7   4    5.70    0.57
   2  -7  -3   30.06    1.06
  -2   7   3   31.57    1.07
   2  -7  -2   52.18    1.65
  -2   7   2   54.32    1.39
   2  -7  -1   10.10    0.49
  -2   7   1    9.51    0.49
   2  -7   0   14.81    0.51
  -2   7   0   13.25    0.69
   2  -7   1  135.90    2.50
  -2   7  -1  127.45    2.66
   2  -7   2    0.53    0.12
  -2   7  -2    0.48    0.16
   2  -7   3    0.66    0.17
  -2   7  -3    0.84    0.16
   2  -7   4   23.70    1.30
   2  -7   4   20.56    0.47
  -2   7  -4   20.91    0.55
   2  -7   5   13.80    0.27
   2  -7   5   15.63    1.13
   2  -7   6    0.29    0.09
   2  -7   6    0.46    0.47
   2  -7   6    0.37    0.15
   2  -7   7   29.14    1.63
   2  -7   7   27.39    0.53
   2  -7   7   28.16    0.56
   2  -7   8   10.53    1.68
   2  -7   8   10.03    0.33
   2  -7   8   10.77    0.31
   2  -7   9    3.39    0.91
   2  -7   9    4.13    0.31
   2  -7   9    3.95    0.27
   2  -7  10    2.94    0.86
   2  -7  10    2.74    0.22
   2  -7  10    3.53    0.31
   2  -7  11   -0.23    0.32
   2  -7  11    0.03    0.12
   2  -7  11   -0.01    0.09
   2  -7  12   15.11    2.19
   2  -7  12   13.71    0.83
   2  -7  12   14.23    0.52
   2  -7  13    0.00    0.30
   2  -7  14    0.01    0.34
   2  -7  15    0.01    0.58
   2  -6 -16    1.91    1.28
   2  -6 -16    1.05    0.69
  -2   6  16    2.03    1.66
   2  -6 -15    1.79    1.20
   2  -6 -15    1.09    0.63
  -2   6  15    1.82    1.01
   2  -6 -14    6.81    0.84
   2  -6 -14    5.81    1.55
  -2   6  14    6.38    1.36
   2  -6 -13    2.07    0.58
   2  -6 -13    1.94    1.06
  -2   6  13    1.80    0.95
   2  -6 -12    6.13    0.73
   2  -6 -12    5.14    1.93
  -2   6  12    5.40    1.13
   2  -6 -11   32.54    2.12
  -2   6  11   33.30    1.93
   2  -6 -10    9.79    1.26
  -2   6  10    9.67    1.11
   2  -6  -9    3.09    0.84
  -2   6   9    2.54    0.78
   2  -6  -8    1.98    0.66
  -2   6   8    1.24    0.63
   2  -6  -7   10.00    0.96
  -2   6   7   11.30    0.92
   2  -6  -6   60.17    1.97
  -2   6   6   60.63    1.94
   2  -6  -5    2.63    0.52
  -2   6   5    3.72    0.53
   2  -6  -4    0.85    0.33
  -2   6   4    0.62    0.32
   2  -6  -3  118.84    2.65
  -2   6   3  111.42    2.55
   2  -6  -2  148.02    3.27
  -2   6   2  138.92    2.92
   2  -6  -1   40.45    0.97
  -2   6   1   35.94    0.93
   2  -6   0    1.68    0.22
  -2   6   0    1.68    0.23
   2  -6   1   60.57    1.15
  -2   6  -1   63.08    1.26
   2  -6   2    2.45    0.17
  -2   6  -2    2.90    0.33
   2  -6   3   21.33    0.53
  -2   6  -3   22.43    0.59
   2  -6   4    3.18    0.62
   2  -6   4    3.13    0.15
  -2   6  -4    2.96    0.23
   2  -6   5   40.43    0.70
   2  -6   5   42.69    1.64
   2  -6   6    0.21    0.23
   2  -6   6   -0.04    0.05
   2  -6   6    0.10    0.12
   2  -6   7    3.78    0.21
   2  -6   7    3.83    0.26
   2  -6   7    3.39    0.72
   2  -6   8    0.09    0.75
   2  -6   8    0.40    0.17
   2  -6   8    0.42    0.14
   2  -6   9   21.14    1.41
   2  -6   9   24.09    0.96
   2  -6   9   22.64    0.70
   2  -6  10   -0.59    0.45
   2  -6  10   -0.13    0.17
   2  -6  10   -0.10    0.28
   2  -6  11   -0.20    0.41
   2  -6  11    0.08    0.19
   2  -6  11    0.23    0.27
   2  -6  12    5.80    0.80
   2  -6  12    6.34    1.02
   2  -6  12    5.86    0.48
   2  -6  13    9.48    1.22
   2  -6  13    9.49    0.61
   2  -6  13    9.08    1.09
   2  -6  14    0.03    0.21
   2  -6  14    0.00    0.44
   2  -6  14   -0.29    0.28
   2  -6  15    0.00    0.32
   2  -6  16    0.00    0.51
   2  -5 -17    7.98    1.87
   2  -5 -17    7.95    2.01
  -2   5  17    8.42    1.67
   2  -5 -16   -0.08    0.48
   2  -5 -16    0.02    0.83
  -2   5  16   -0.52    0.68
   2  -5 -15    1.98    0.73
   2  -5 -15    2.89    1.29
  -2   5  15    2.96    1.66
   2  -5 -14   13.91    1.88
   2  -5 -14   13.71    1.11
  -2   5  14   16.16    1.62
   2  -5 -13   10.42    1.53
   2  -5 -13    8.88    0.89
  -2   5  13    9.81    1.31
   2  -5 -12    1.47    0.81
   2  -5 -12    0.66    0.45
  -2   5  12    0.78    0.68
   2  -5 -11    9.09    1.25
   2  -5 -11    7.45    0.72
  -2   5  11    7.18    1.10
   2  -5 -10    0.66    0.59
  -2   5  10    0.17    0.52
   2  -5  -9  127.36    4.04
  -2   5   9  119.28    3.58
   2  -5  -8    6.09    0.88
  -2   5   8    6.59    0.79
   2  -5  -7    3.84    0.68
  -2   5   7    4.30    0.66
   2  -5  -6   83.54    2.35
  -2   5   6   81.65    2.28
   2  -5  -5   18.21    0.91
  -2   5   5   17.81    0.87
   2  -5  -4   49.08    1.36
  -2   5   4   45.37    1.67
   2  -5  -3    0.03    0.19
  -2   5   3    0.25    0.20
   2  -5  -2    6.81    0.57
  -2   5   2    5.83    0.41
   2  -5  -1   75.54    1.77
  -2   5   1   75.98    1.55
   2  -5   0    6.68    0.44
  -2   5   0    6.00    0.32
   2  -5   1   11.07    0.34
  -2   5  -1   10.87    0.39
   2  -5   2   99.73    1.81
  -2   5  -2  105.25    1.94
   2  -5   3    1.35    0.14
  -2   5  -3    1.06    0.29
   2  -5   4   15.09    0.46
  -2   5  -4   16.17    0.66
   2  -5   5   12.42    0.85
   2  -5   5   12.62    0.46
   2  -5   6    7.86    0.38
   2  -5   6    8.76    0.77
   2  -5   6    7.60    0.31
   2  -5   7    0.07    0.08
   2  -5   7   -0.38    0.18
   2  -5   7    0.02    0.10
   2  -5   8    0.58    0.19
   2  -5   8    0.05    0.66
   2  -5   8    0.33    0.21
   2  -5   9    1.67    0.32
   2  -5   9    1.12    0.61
   2  -5   9    2.02    0.33
   2  -5  10   11.10    1.03
   2  -5  10    9.60    0.87
   2  -5  10   11.25    0.64
   2  -5  11    2.57    0.68
   2  -5  11    2.13    0.41
   2  -5  11    2.18    0.43
   2  -5  12    4.72    0.89
   2  -5  12    5.32    0.57
   2  -5  12    5.05    0.62
   2  -5  13    8.59    1.03
   2  -5  13    8.20    1.20
   2  -5  13    8.20    0.70
   2  -5  14    0.29    0.50
   2  -5  14    0.27    0.62
   2  -5  14    0.28    0.51
   2  -5  15    0.02    0.26
   2  -5  15    0.19    0.50
   2  -5  15    0.00    0.39
   2  -5  16    0.01    0.33
   2  -4 -17    2.69    1.42
   2  -4 -17    2.87    0.89
  -2   4  17    0.02    1.16
   2  -4 -16    2.28    0.85
   2  -4 -16    2.53    1.39
  -2   4  16    3.03    1.13
   2  -4 -15   -0.18    0.71
   2  -4 -15   -0.03    0.44
  -2   4  15   -0.60    0.92
   2  -4 -14    3.05    1.13
   2  -4 -14    3.06    1.21
  -2   4  14    3.49    1.03
   2  -4 -13    6.36    1.24
   2  -4 -13    7.11    1.34
  -2   4  13    6.97    1.14
   2  -4 -12   20.23    1.61
   2  -4 -12   20.81    1.75
  -2   4  12   21.52    1.56
   2  -4 -11   14.05    1.29
   2  -4 -11   12.11    1.41
  -2   4  11   13.80    1.22
   2  -4 -10    6.83    1.08
  -2   4  10    7.23    0.93
   2  -4  -9  210.31    5.80
  -2   4   9  202.85    5.29
   2  -4  -8   -0.16    0.25
  -2   4   8    0.12    0.24
   2  -4  -7    6.38    1.10
  -2   4   7    6.25    0.70
   2  -4  -6   94.19    2.52
  -2   4   6   90.61    2.34
   2  -4  -5   48.00    1.43
  -2   4   5   47.76    1.40
   2  -4  -4    1.44    0.33
  -2   4   4    1.60    0.34
   2  -4  -3   28.06    1.09
  -2   4   3   25.55    0.83
   2  -4  -2    7.69    0.60
  -2   4   2    7.33    0.41
   2  -4  -1   23.81    0.62
  -2   4   1   25.38    0.87
   2  -4   0    4.56    0.26
  -2   4   0    4.62    0.29
   2  -4   1    2.25    0.19
  -2   4  -1    2.27    0.22
   2  -4   2   94.04    1.62
  -2   4  -2   95.62    1.79
   2  -4   3   71.36    1.26
  -2   4  -3   72.49    1.61
   2  -4   4    0.29    0.17
  -2   4  -4    0.14    0.14
   2  -4   5  175.32    4.15
   2  -4   5  178.69    3.31
   2  -4   6   54.01    1.29
   2  -4   6   53.80    1.40
   2  -4   6   54.46    2.13
   2  -4   7   10.70    0.74
   2  -4   7   11.50    0.80
   2  -4   7   10.56    0.49
   2  -4   8    0.53    0.24
   2  -4   8    0.98    0.40
   2  -4   8    0.50    0.26
   2  -4   9    2.37    0.83
   2  -4   9    1.52    0.58
   2  -4   9    1.86    0.37
   2  -4  10   59.19    1.81
   2  -4  10   61.90    2.75
   2  -4  10   65.32    2.33
   2  -4  11   15.61    1.30
   2  -4  11   14.95    1.24
   2  -4  11   14.42    1.08
   2  -4  12    0.67    0.46
   2  -4  12    0.10    0.39
   2  -4  12    0.54    0.36
   2  -4  13   22.15    1.39
   2  -4  13   23.85    1.23
   2  -4  13   23.20    1.36
   2  -4  14    4.10    0.80
   2  -4  14    3.77    0.83
   2  -4  14    4.04    0.68
   2  -4  15    1.52    0.71
   2  -4  15    0.63    1.04
   2  -4  15    1.97    0.90
   2  -4  16    0.25    0.41
   2  -4  16    0.44    0.80
   2  -4  16    0.00    0.49
   2  -4  17    3.12    0.77
   2  -4  17    3.44    0.94
   2  -4  17    2.16    0.97
   2  -3 -17   -0.08    0.61
   2  -3 -17   -0.01    0.64
  -2   3  17    0.01    0.48
   2  -3 -16    0.04    0.56
  -2   3  16    0.00    0.45
   2  -3 -15    0.17    0.36
   2  -3 -15   -0.26    0.55
  -2   3  15   -0.20    0.43
   2  -3 -14    0.67    0.87
   2  -3 -14    1.07    0.60
  -2   3  14    1.42    1.19
   2  -3 -13    9.45    0.93
   2  -3 -13    6.87    1.37
  -2   3  13    9.37    1.16
   2  -3 -12    3.92    1.07
   2  -3 -12    5.09    1.06
  -2   3  12    5.03    0.90
   2  -3 -11    0.52    0.53
   2  -3 -11    0.21    0.55
  -2   3  11    0.11    0.46
   2  -3 -10   26.40    1.58
   2  -3 -10   23.98    1.60
  -2   3  10   28.73    1.45
   2  -3  -9   72.47    2.07
   2  -3  -9   76.28    3.25
  -2   3   9   82.71    2.47
   2  -3  -8    1.59    0.59
  -2   3   8    1.76    0.50
   2  -3  -7   16.19    0.95
  -2   3   7   14.65    0.85
   2  -3  -6   -0.25    0.41
  -2   3   6    0.31    0.25
   2  -3  -5   46.78    1.34
  -2   3   5   41.62    1.25
   2  -3  -4    7.08    0.48
  -2   3   4    5.79    0.47
   2  -3  -3    7.11    0.42
  -2   3   3    6.07    0.64
   2  -3  -2    4.71    0.50
  -2   3   2    4.35    0.34
   2  -3  -1    0.24    0.15
  -2   3   1    0.18    0.15
   2  -3   0   42.11    0.87
  -2   3   0   42.65    0.90
   2  -3   1   91.48    1.63
  -2   3  -1   91.84    1.71
   2  -3   2    9.60    0.33
  -2   3  -2    9.78    0.38
   2  -3   3  342.03    6.16
  -2   3  -3  331.36    6.53
   2  -3   4   35.35    0.81
  -2   3  -4   34.62    0.88
   2  -3   5    5.25    0.52
   2  -3   5    5.25    0.32
   2  -3   6  166.60    4.22
   2  -3   6  165.82    3.46
   2  -3   6  168.14    3.44
   2  -3   7   12.06    0.73
   2  -3   7   11.79    0.60
   2  -3   7   11.57    0.58
   2  -3   8    0.03    0.20
   2  -3   8    0.14    0.20
   2  -3   8    0.11    0.24
   2  -3   9    1.08    0.36
   2  -3   9    1.13    0.42
   2  -3   9    1.04    0.38
   2  -3  10   47.53    1.65
   2  -3  10   49.26    2.06
   2  -3  10   47.80    1.69
   2  -3  11   -0.30    0.26
   2  -3  11    0.26    0.27
   2  -3  11    0.23    0.27
   2  -3  12   31.05    1.40
   2  -3  12   31.35    1.50
   2  -3  12   33.66    1.44
   2  -3  13   11.60    1.41
   2  -3  13   12.11    1.08
   2  -3  13   12.63    1.52
   2  -3  14   22.18    1.35
   2  -3  14   20.88    1.46
   2  -3  14   21.34    1.31
   2  -3  15    6.59    0.89
   2  -3  15    4.19    0.86
   2  -3  15    6.01    1.02
   2  -3  16    0.78    1.09
   2  -3  16    0.75    0.93
   2  -3  16    0.73    0.57
   2  -3  17    0.68    0.70
   2  -3  17    2.03    0.73
   2  -3  17    1.57    0.87
   2  -2 -17    4.38    0.99
   2  -2 -17   -0.15    1.36
  -2   2  17    0.02    1.64
   2  -2 -16   13.07    1.47
   2  -2 -16   13.70    1.90
  -2   2  16   11.97    1.52
   2  -2 -15   -0.07    1.20
   2  -2 -15    3.41    0.90
  -2   2  15    3.37    0.92
   2  -2 -14   -0.05    0.26
   2  -2 -14    0.45    0.35
  -2   2  14   -0.23    0.29
   2  -2 -13    2.66    0.97
   2  -2 -13    2.87    0.72
  -2   2  13    2.12    1.23
   2  -2 -12    2.51    0.61
   2  -2 -12    1.39    0.83
  -2   2  12    2.37    0.69
   2  -2 -11    0.23    0.82
   2  -2 -11    0.50    0.57
  -2   2  11    0.24    0.43
   2  -2 -10    5.95    0.93
   2  -2 -10    5.56    0.65
  -2   2  10    6.17    0.77
   2  -2  -9   -0.07    0.21
   2  -2  -9    0.30    0.29
  -2   2   9   -0.24    0.26
   2  -2  -8   37.25    1.56
   2  -2  -8   41.46    1.30
  -2   2   8   39.00    1.41
   2  -2  -7    0.60    0.38
  -2   2   7    0.61    0.33
   2  -2  -6    0.04    0.25
  -2   2   6    0.30    0.24
   2  -2  -5  126.11    2.75
  -2   2   5  123.20    2.65
   2  -2  -4   63.57    1.47
  -2   2   4   61.80    1.44
   2  -2  -3   55.67    1.24
  -2   2   3   54.51    1.24
   2  -2  -2   62.26    1.50
  -2   2   2   62.08    1.30
   2  -2  -1   12.38    0.45
  -2   2   1   12.09    0.46
   2  -2   0   11.95    0.61
  -2   2   0   11.53    0.42
   2  -2   1  237.98    4.18
  -2   2  -1  239.34    4.31
   2  -2   2  331.57    5.96
  -2   2  -2  324.02    6.07
   2  -2   3 1389.38   30.07
  -2   2  -3 1414.12   31.31
   2  -2   4  232.84    4.71
   2  -2   5  139.88    2.85
   2  -2   5  140.59    3.00
   2  -2   6    4.51    0.43
   2  -2   6    4.46    0.41
   2  -2   6    3.78    0.59
   2  -2   7   30.51    1.05
   2  -2   7   31.49    1.03
   2  -2   7   32.05    1.35
   2  -2   8    5.13    0.79
   2  -2   8    4.73    0.52
   2  -2   8    5.89    0.50
   2  -2   9    2.80    0.69
   2  -2   9    2.61    0.50
   2  -2  10   26.21    1.66
   2  -2  10   25.36    1.43
   2  -2  11    2.08    0.70
   2  -2  11    1.15    0.86
   2  -2  12    1.88    0.49
   2  -2  12    2.39    0.63
   2  -2  13   22.80    1.36
   2  -2  13   20.04    1.12
   2  -2  14    1.43    0.50
   2  -2  14    0.66    0.95
   2  -2  15    2.54    0.64
   2  -2  15    2.94    0.83
   2  -2  16   -0.02    0.38
   2  -2  16   -0.14    0.52
   2  -2  16   -0.27    0.45
   2  -2  17    0.20    0.56
   2  -2  17   -0.19    0.74
   2  -2  17    0.18    0.71
   2  -1 -17   -0.14    1.14
   2  -1 -17    6.59    1.42
  -2   1  17   -0.02    0.87
   2  -1 -16    3.22    0.91
   2  -1 -16    0.09    1.71
  -2   1  16    0.03    1.34
   2  -1 -15   11.05    1.38
   2  -1 -15   11.87    1.63
  -2   1  15   12.09    1.30
   2  -1 -14    0.91    0.96
   2  -1 -14   -0.03    0.73
  -2   1  14    0.91    0.58
   2  -1 -13    0.32    0.43
   2  -1 -13    0.04    0.52
  -2   1  13    0.13    0.41
   2  -1 -12    0.25    0.57
   2  -1 -12    0.78    0.47
  -2   1  12   -0.02    0.72
   2  -1 -11    0.30    0.54
   2  -1 -11    0.11    0.69
  -2   1  11    0.09    0.56
   2  -1 -10   24.21    1.17
   2  -1 -10   20.43    1.36
  -2   1  10   23.82    1.17
   2  -1  -9    0.05    0.32
   2  -1  -9    0.49    0.40
  -2   1   9    0.41    0.33
   2  -1  -8   17.77    1.47
   2  -1  -8   17.66    0.88
  -2   1   8   18.93    0.90
   2  -1  -7   11.41    0.75
   2  -1  -7   11.10    0.66
  -2   1   7   11.30    0.97
   2  -1  -6   52.84    1.48
  -2   1   6   52.87    1.38
   2  -1  -5    1.60    0.33
  -2   1   5    1.68    0.31
   2  -1  -4  331.63    6.41
  -2   1   4  315.21    6.08
   2  -1  -3  125.56    2.38
  -2   1   3  124.70    2.38
   2  -1  -2  174.31    3.37
  -2   1   2  170.80    3.12
   2  -1  -1  113.58    2.06
  -2   1   1  109.81    2.02
   2  -1   0  395.71    7.07
  -2   1   0  380.98    6.94
   2  -1   1    0.55    0.17
  -2   1  -1    0.44    0.17
   2  -1   2  663.30   12.87
  -2   1  -2  662.34   13.41
   2  -1   3  944.61   19.85
  -2   1  -3  942.60   19.83
   2  -1   4  191.89    4.04
   2  -1   5   84.17    1.77
   2  -1   5   85.32    1.95
   2  -1   6    0.11    0.14
   2  -1   6    0.01    0.14
   2  -1   6   -0.04    0.11
   2  -1   7   62.15    1.73
   2  -1   7   61.69    1.45
   2  -1   8   23.63    0.82
   2  -1   8   24.15    1.38
   2  -1   9    8.42    0.54
   2  -1   9    8.30    1.08
   2  -1  10    0.20    0.47
   2  -1  10   -0.20    0.31
   2  -1  11   17.07    1.16
   2  -1  11   15.46    0.77
   2  -1  12   12.30    1.08
   2  -1  12   10.90    0.71
   2  -1  13    7.14    0.65
   2  -1  13    6.93    0.99
   2  -1  14    7.84    1.07
   2  -1  14    7.29    0.72
   2  -1  15    8.77    1.16
   2  -1  16    0.10    0.73
   2  -1  17    1.39    0.84
   2  -1  18    1.63    0.90
   2   0 -17   -0.19    0.61
   2   0 -17   -0.04    0.55
  -2   0  17   -0.01    0.46
   2   0 -16   -0.01    0.72
   2   0 -16    1.35    0.96
  -2   0  16    0.00    0.52
   2   0 -15    4.12    1.01
   2   0 -15    0.10    1.11
  -2   0  15    5.68    1.29
   2   0 -14    9.40    1.23
   2   0 -14    9.53    2.02
  -2   0  14    9.73    1.05
   2   0 -13    0.03    0.43
   2   0 -13    0.38    0.46
  -2   0  13   -0.02    0.36
   2   0 -12    7.13    0.95
   2   0 -12    7.63    1.03
  -2   0  12    7.06    0.81
   2   0 -11   21.88    1.26
   2   0 -11   18.88    1.36
  -2   0  11   21.43    1.14
   2   0 -10    1.60    0.51
   2   0 -10    1.18    0.57
  -2   0  10    0.89    0.44
   2   0  -9    0.29    0.21
   2   0  -9   -0.44    0.23
  -2   0   9    0.10    0.18
   2   0  -8    3.77    0.90
   2   0  -8    3.91    0.52
  -2   0   8    3.76    0.47
   2   0  -7   36.22    1.20
   2   0  -7   33.14    1.19
  -2   0   7   34.52    1.05
   2   0  -6  128.37    2.88
   2   0  -6  125.44    2.80
  -2   0   6  122.25    2.58
   2   0  -5    7.28    0.67
   2   0  -5    7.66    0.50
  -2   0   5    6.96    0.42
   2   0  -4  253.10    4.76
  -2   0   4  248.21    4.91
   2   0  -3  692.21   13.43
  -2   0   3  696.71   13.55
   2   0  -2 1053.18   21.09
  -2   0   2 1031.00   20.88
   2   0  -1   52.77    1.07
  -2   0   1   50.17    1.04
   2   0   0    2.77    0.24
  -2   0   0    2.14    0.25
   2   0   1    0.46    0.16
  -2   0  -1    0.18    0.18
   2   0   2  112.14    2.19
  -2   0  -2  112.94    2.29
   2   0   3  296.71    5.80
  -2   0  -3  306.85    6.05
   2   0   4   73.29    1.73
   2   0   5    3.77    0.38
   2   0   5    3.79    0.42
   2   0   6   22.93    0.94
   2   0   6   23.97    0.61
   2   0   7    1.64    0.23
   2   0   7    2.22    0.65
   2   0   8   40.11    0.98
   2   0   8   38.56    1.81
   2   0   9   12.06    0.71
   2   0   9   12.12    1.30
   2   0  10    1.45    0.42
   2   0  10    1.08    0.55
   2   0  11    1.21    0.46
   2   0  11    1.43    0.59
   2   0  12   12.02    1.14
   2   0  12   11.70    0.92
   2   0  13    0.33    0.26
   2   0  13   -0.15    0.81
   2   0  14   -0.08    0.44
   2   0  15   14.44    1.45
   2   0  16    5.17    1.17
   2   0  17    0.32    0.66
   2   0  18    0.95    0.88
   2   1 -17    0.00    1.43
   2   1 -17    0.13    1.45
  -2  -1  17    1.67    1.07
   2   1 -16    0.00    1.00
   2   1 -16    2.58    1.01
  -2  -1  16    2.44    0.74
   2   1 -15    0.33    0.93
   2   1 -15   -0.71    0.92
  -2  -1  15    0.40    0.44
   2   1 -14   27.55    1.84
   2   1 -14   25.56    1.84
  -2  -1  14   25.46    1.45
   2   1 -13    0.60    0.58
   2   1 -13    0.48    0.61
  -2  -1  13    0.48    0.69
   2   1 -12    0.22    0.67
   2   1 -12    0.45    0.46
  -2  -1  12   -0.18    0.51
   2   1 -11   28.28    1.53
   2   1 -11   29.71    1.51
  -2  -1  11   29.31    1.24
   2   1 -10   12.68    1.04
   2   1 -10   12.38    1.00
  -2  -1  10   14.25    0.80
   2   1  -9    2.36    0.57
   2   1  -9    1.95    0.80
  -2  -1   9    2.45    0.43
   2   1  -8    0.33    0.46
   2   1  -8    0.14    0.51
  -2  -1   8    0.24    0.36
   2   1  -7   80.84    2.13
   2   1  -7   70.18    2.26
  -2  -1   7   75.71    1.73
   2   1  -6  202.68    4.45
   2   1  -6  183.99    4.19
  -2  -1   6  202.27    3.95
   2   1  -5  144.51    2.86
   2   1  -5  144.30    3.16
  -2  -1   5  141.77    2.73
   2   1  -4   38.29    1.11
   2   1  -4   37.83    1.07
  -2  -1   4   37.96    1.07
   2   1  -3  692.52   14.18
   2   1  -3  668.06   12.83
  -2  -1   3  691.09   13.33
   2   1  -2  917.20   18.00
  -2  -1   2  920.71   18.30
   2   1  -1  325.19    5.78
  -2  -1   1  319.24    5.78
   2   1   0    0.13    0.15
  -2  -1   0    0.44    0.17
   2   1   1  118.74    2.27
  -2  -1  -1  115.58    2.29
   2   1   2   75.31    1.63
  -2  -1  -2   74.21    1.68
   2   1   3    0.66    0.26
   2   1   4    4.66    0.45
   2   1   5  173.45    2.88
   2   1   6    0.98    0.19
   2   1   6    0.97    0.37
   2   1   7   41.45    0.93
   2   1   7   40.44    1.43
   2   1   8    6.29    0.28
   2   1   8    6.36    0.69
   2   1   9    9.87    1.31
   2   1   9    9.97    0.53
   2   1  10    0.32    0.26
   2   1  10    0.37    0.44
   2   1  11    0.01    0.09
   2   1  11   -0.09    0.25
   2   1  12   26.85    1.69
   2   1  13    8.49    1.20
   2   1  14   19.38    1.62
   2   1  15   21.43    2.62
   2   1  16    5.51    1.23
   2   1  17   -1.77    1.50
   2   1  18    1.69    1.06
   2   2 -16    0.16    1.30
   2   2 -16   -0.01    1.47
  -2  -2  16    1.38    0.61
   2   2 -15   -0.39    0.59
   2   2 -15   -0.11    0.66
  -2  -2  15   -0.24    0.67
   2   2 -14   30.98    3.02
   2   2 -14   32.19    1.89
  -2  -2  14   30.47    1.46
   2   2 -13    1.44    0.76
   2   2 -13    1.47    1.03
  -2  -2  13    1.10    0.49
   2   2 -12   -0.08    0.42
   2   2 -12    0.47    0.80
  -2  -2  12    0.40    0.32
   2   2 -11    5.68    0.92
   2   2 -11    5.07    0.73
  -2  -2  11    4.40    0.56
   2   2 -10   23.16    1.42
   2   2 -10   22.73    1.62
  -2  -2  10   22.34    0.93
   2   2  -9    1.30    0.67
   2   2  -9    1.12    0.54
  -2  -2   9    1.22    0.33
   2   2  -8    5.67    0.73
   2   2  -8    6.04    0.56
  -2  -2   8    5.63    0.44
   2   2  -7    4.28    0.61
   2   2  -7    4.78    0.45
  -2  -2   7    4.57    0.54
   2   2  -6   16.60    0.86
   2   2  -6   20.36    0.93
  -2  -2   6   19.33    0.60
   2   2  -5    2.14    0.26
   2   2  -5    2.14    0.42
  -2  -2   5    2.28    0.24
   2   2  -4  108.70    2.02
   2   2  -4  112.81    2.51
  -2  -2   4  111.55    2.05
   2   2  -3    0.45    0.24
   2   2  -3    0.31    0.14
  -2  -2   3    0.52    0.24
   2   2  -2   68.48    1.26
   2   2  -2   69.19    1.54
  -2  -2   2   71.49    1.35
   2   2  -1  158.51    3.01
   2   2  -1  166.11    2.88
  -2  -2   1  160.21    2.89
   2   2   0    0.49    0.17
   2   2   0    0.70    0.28
  -2  -2   0    0.45    0.18
   2   2   1  137.79    2.91
   2   2   1  132.49    2.25
  -2  -2  -1  133.85    2.65
   2   2   2   46.88    1.17
  -2  -2  -2   46.05    1.20
   2   2   3    3.06    0.39
   2   2   5    5.24    0.12
   2   2   5    5.26    0.54
   2   2   6   69.34    2.00
   2   2   6   70.55    0.99
   2   2   7   34.39    1.36
   2   2   7   34.57    0.54
   2   2   8   20.93    1.14
   2   2   9   52.52    1.97
   2   2  10   28.52    1.56
   2   2  11    4.99    0.93
   2   2  12   12.02    1.28
   2   2  13   32.76    2.01
   2   2  14   17.27    1.68
   2   2  15   10.70    1.54
   2   2  16    9.22    1.51
   2   2  17    0.96    1.50
   2   2  18    1.02    1.00
   2   3 -16    0.01    0.60
   2   3 -16    0.00    0.51
  -2  -3  16    0.20    0.54
   2   3 -15    0.01    0.46
   2   3 -15    0.53    0.90
  -2  -3  15   -0.20    0.32
   2   3 -14   10.64    1.20
   2   3 -14   10.35    1.50
  -2  -3  14    9.25    0.86
   2   3 -13    9.14    1.03
   2   3 -13    8.28    1.33
  -2  -3  13    8.04    0.74
   2   3 -12    1.56    0.80
   2   3 -12    1.61    0.58
  -2  -3  12    1.72    0.43
   2   3 -11    4.69    0.94
   2   3 -11    3.82    1.00
  -2  -3  11    3.76    0.50
   2   3 -10   15.24    1.80
   2   3 -10   12.85    0.87
  -2  -3  10   12.19    0.67
   2   3  -9   21.95    1.36
   2   3  -9   20.60    0.96
  -2  -3   9   19.63    0.77
   2   3  -8    7.35    0.56
   2   3  -8    7.79    0.86
  -2  -3   8    7.41    0.45
   2   3  -7    0.21    0.18
   2   3  -7   -0.05    0.11
  -2  -3   7    0.19    0.15
  -2  -3   7   -0.07    0.08
   2   3  -6    2.92    0.55
   2   3  -6    2.51    0.46
  -2  -3   6    2.97    0.47
  -2  -3   6    3.28    0.39
   2   3  -5    8.15    0.38
   2   3  -5    9.80    0.70
  -2  -3   5   10.90    0.65
  -2  -3   5    9.98    0.51
   2   3  -4   -0.03    0.10
   2   3  -4    0.00    0.21
  -2  -3   4    0.05    0.30
  -2  -3   4    0.17    0.10
   2   3  -3   19.35    0.46
   2   3  -3   19.59    0.82
  -2  -3   3   19.25    0.76
  -2  -3   3   20.74    0.52
   2   3  -2  135.12    2.30
   2   3  -2  131.33    2.83
  -2  -3   2  137.92    2.80
  -2  -3   2  136.35    2.45
   2   3  -1    1.05    0.32
   2   3  -1    2.68    0.31
  -2  -3   1    2.63    0.29
  -2  -3   1    2.27    0.23
   2   3   0    6.81    0.35
   2   3   0    6.59    0.38
  -2  -3   0    6.99    0.37
  -2  -3   0    7.09    0.38
   2   3   1   10.66    0.39
   2   3   1   10.92    0.50
  -2  -3  -1   10.05    0.50
  -2  -3  -1   10.72    0.36
   2   3   2   20.12    0.46
   2   3   2   21.05    0.76
   2   3   3   13.93    0.36
   2   3   4   37.09    0.48
   2   3   4   37.14    1.20
   2   3   5   11.46    0.74
   2   3   6   80.53    2.27
   2   3   7    3.25    0.95
   2   3   8    0.30    0.40
   2   3   9   70.49    2.45
   2   3  10   89.25    3.80
   2   3  11   -0.22    0.53
   2   3  12    0.05    0.43
   2   3  13   20.06    1.72
   2   3  14    0.80    0.80
   2   3  15    0.06    0.54
   2   3  16    0.53    0.82
   2   3  17    0.88    0.98
   2   3  18    1.60    1.14
   2   4 -16    0.00    1.98
   2   4 -16    0.01    0.96
  -2  -4  16    5.99    1.02
   2   4 -15   -0.01    0.37
   2   4 -15    0.00    0.50
  -2  -4  15   -0.03    0.24
   2   4 -14    0.01    0.57
   2   4 -14    0.76    0.83
  -2  -4  14    0.82    0.38
   2   4 -13    0.00    1.08
   2   4 -13    3.02    1.04
  -2  -4  13    2.88    0.50
   2   4 -12    4.07    0.72
   2   4 -12    3.44    1.09
  -2  -4  12    4.57    0.51
   2   4 -11    3.14    0.90
   2   4 -11    2.10    0.54
  -2  -4  11    2.26    0.39
   2   4 -10    5.51    1.01
   2   4 -10    5.87    0.90
  -2  -4  10    5.65    0.46
   2   4  -9   41.55    1.71
   2   4  -9   43.57    2.00
  -2  -4   9   45.05    1.80
  -2  -4   9   40.58    1.10
   2   4  -8    2.54    0.57
   2   4  -8    2.33    0.72
  -2  -4   8    2.99    0.47
  -2  -4   8    2.78    0.61
   2   4  -7    1.86    0.60
   2   4  -7    1.91    0.28
  -2  -4   7    1.48    0.79
  -2  -4   7    1.96    0.24
   2   4  -6   33.39    1.44
   2   4  -6   32.24    0.81
  -2  -4   6   33.08    1.25
  -2  -4   6   32.52    0.76
   2   4  -5   35.15    0.77
   2   4  -5   37.06    1.43
  -2  -4   5   37.63    1.27
  -2  -4   5   36.92    0.94
   2   4  -4    1.08    0.24
   2   4  -4    1.03    0.44
  -2  -4   4    1.67    0.59
  -2  -4   4    1.60    0.17
   2   4  -3   50.44    1.53
   2   4  -3   49.94    1.01
  -2  -4   3   50.30    1.00
  -2  -4   3   50.10    1.40
   2   4  -2  145.19    3.22
   2   4  -2  147.02    2.49
  -2  -4   2  145.98    2.68
  -2  -4   2  141.37    3.04
   2   4  -1   29.66    0.93
   2   4  -1   28.86    0.67
  -2  -4   1   29.46    0.74
  -2  -4   1   29.41    0.86
   2   4   0    8.80    0.47
   2   4   0    7.86    0.38
  -2  -4   0    7.69    0.62
  -2  -4   0    8.50    0.41
   2   4   1   17.37    0.75
   2   4   1   16.88    0.62
  -2  -4  -1   17.31    0.70
   2   4   2  148.83    3.49
   2   4   2  152.28    2.90
  -2  -4  -2  151.67    2.63
   2   4   3  178.86    2.99
  -2  -4  -3  177.82    2.90
   2   4   4   12.27    1.04
  -2  -4  -4   12.08    0.28
   2   4   5    0.73    0.38
   2   4   6  199.50    4.87
   2   4   7   65.83    2.16
   2   4   8    4.58    1.15
   2   4   9    9.93    1.07
   2   4  10   53.00    2.34
   2   4  11    2.28    0.89
   2   4  12    0.92    0.75
   2   4  13    7.30    1.32
   2   4  14   15.29    1.73
   2   4  15    1.93    1.10
   2   4  16   -0.08    0.62
   2   4  17   -0.08    0.66
   2   4  18    5.19    1.55
   2   5 -15    0.00    0.99
  -2  -5  15    0.93    0.43
   2   5 -14    0.01    0.52
   2   5 -14    0.00    0.82
  -2  -5  14    0.67    0.35
   2   5 -13    0.00    0.53
   2   5 -13    0.27    0.57
  -2  -5  13    0.06    0.23
   2   5 -12    0.00    0.59
   2   5 -12    2.65    1.01
  -2  -5  12    3.11    0.41
   2   5 -11    2.67    0.91
   2   5 -11    0.00    0.49
  -2  -5  11    2.54    0.75
  -2  -5  11    2.36    0.35
   2   5 -10   22.25    1.70
   2   5 -10   21.75    0.96
  -2  -5  10   23.85    1.48
  -2  -5  10   22.47    1.02
   2   5  -9    4.23    0.46
   2   5  -9    4.66    1.01
  -2  -5   9    5.07    1.25
  -2  -5   9    4.84    0.36
   2   5  -8   36.43    1.05
   2   5  -8   37.74    2.58
  -2  -5   8   36.50    1.63
  -2  -5   8   35.89    1.11
   2   5  -7    0.26    0.15
   2   5  -7   -0.13    0.39
  -2  -5   7    0.15    0.33
  -2  -5   7    0.08    0.13
   2   5  -6    7.03    0.85
   2   5  -6    6.21    0.46
  -2  -5   6    7.09    0.44
  -2  -5   6    7.79    0.74
   2   5  -5   32.30    0.67
   2   5  -5   31.41    1.40
  -2  -5   5   33.29    1.28
  -2  -5   5   33.63    0.75
   2   5  -4    1.96    0.24
   2   5  -4    2.51    0.53
  -2  -5   4    2.26    0.46
  -2  -5   4    2.15    0.19
   2   5  -3   38.65    0.70
   2   5  -3   40.94    1.38
  -2  -5   3   39.51    0.98
  -2  -5   3   39.18    1.27
   2   5  -2   21.07    0.48
   2   5  -2   21.80    0.93
  -2  -5   2   19.43    0.84
  -2  -5   2   21.54    0.58
   2   5  -1   45.01    1.32
   2   5  -1   49.26    1.16
  -2  -5   1   46.20    1.25
  -2  -5   1   46.27    1.05
   2   5   0   -0.04    0.10
   2   5   0   -0.05    0.15
  -2  -5   0    0.12    0.22
   2   5   1   23.95    0.79
   2   5   1   25.86    1.01
  -2  -5  -1   23.15    0.71
   2   5   2   84.77    2.02
   2   5   2   84.85    1.95
  -2  -5  -2   82.58    1.63
   2   5   3  225.89    4.14
   2   5   3  220.97    5.22
  -2  -5  -3  219.19    3.89
   2   5   4    0.25    0.30
  -2  -5  -4    0.34    0.15
   2   5   5    2.98    0.52
  -2  -5  -5    2.53    0.11
   2   5   6   81.98    2.44
   2   5   7    0.39    0.43
   2   5   8   19.96    1.32
   2   5   9    0.09    0.65
   2   5  10   27.18    1.76
   2   5  11   21.41    2.56
   2   5  12    5.47    1.16
   2   5  13    1.73    1.53
   2   5  14   14.17    1.74
   2   5  15   -0.12    0.68
   2   5  16   -0.06    0.62
   2   5  17   -0.11    0.73
   2   5  18   -0.12    0.78
   2   6 -15    0.00    0.41
   2   6 -14    0.00    0.41
   2   6 -13    0.00    0.28
   2   6 -13    0.93    0.82
  -2  -6  13   -0.04    0.28
   2   6 -12    9.40    0.78
   2   6 -12    6.82    1.47
  -2  -6  12    9.54    1.29
  -2  -6  12    8.14    0.83
   2   6 -11   24.22    1.06
   2   6 -11   25.71    2.03
  -2  -6  11   24.27    1.72
  -2  -6  11   23.93    0.83
   2   6 -10   25.09    0.96
   2   6 -10   24.19    1.89
  -2  -6  10   23.34    2.30
  -2  -6  10   24.64    0.77
   2   6  -9    6.45    1.66
   2   6  -9    5.45    0.63
  -2  -6   9    4.80    0.35
  -2  -6   9    4.28    0.90
   2   6  -8   23.68    1.66
   2   6  -8   24.07    0.96
  -2  -6   8   25.33    0.89
  -2  -6   8   25.27    1.44
   2   6  -7    2.02    0.25
   2   6  -7    3.53    0.79
  -2  -6   7    2.74    0.65
  -2  -6   7    2.52    0.23
   2   6  -6    2.85    0.75
   2   6  -6    2.92    0.31
  -2  -6   6    2.79    0.63
  -2  -6   6    2.85    0.31
   2   6  -5    9.77    0.29
   2   6  -5    9.51    0.95
  -2  -6   5   10.14    1.26
  -2  -6   5   10.32    0.47
   2   6  -4    7.95    0.23
   2   6  -4    7.91    0.82
  -2  -6   4    8.40    0.75
  -2  -6   4    8.42    0.43
   2   6  -3    9.04    0.25
   2   6  -3    9.89    0.80
  -2  -6   3   10.25    0.35
  -2  -6   3    9.59    0.72
   2   6  -2   14.08    0.85
   2   6  -2   13.70    0.46
  -2  -6   2   14.96    0.79
   2   6  -1   10.31    0.70
   2   6  -1   10.17    0.38
  -2  -6   1   10.48    0.65
   2   6   0  229.20    5.01
   2   6   0  227.54    4.50
  -2  -6   0  229.19    4.84
   2   6   1    0.16    0.21
   2   6   1    0.31    0.23
   2   6   1    0.51    0.34
  -2  -6  -1    0.42    0.22
   2   6   2   13.46    0.68
   2   6   2   15.08    0.60
   2   6   2   13.20    0.66
  -2  -6  -2   13.05    0.54
   2   6   3  171.75    4.33
  -2  -6  -3  166.75    3.18
   2   6   4   55.30    1.72
  -2  -6  -4   52.65    1.06
   2   6   5   32.00    1.31
  -2  -6  -5   32.33    0.64
   2   6   6    8.63    0.81
  -2  -6  -6    7.57    0.27
   2   6   7   41.38    1.72
  -2  -6  -7   40.50    0.53
   2   6   8    0.34    0.48
   2   6   9   15.83    1.36
   2   6  10    0.03    0.39
   2   6  11   56.47    2.64
   2   6  12    4.10    1.16
   2   6  13   12.14    1.63
   2   6  14    4.03    1.30
   2   6  15   -0.03    0.88
   2   6  16    0.05    0.63
   2   6  17    0.11    0.76
   2   7 -14    0.46    0.93
   2   7 -13    0.19    0.84
  -2  -7  13    0.50    0.73
   2   7 -12    8.47    1.50
  -2  -7  12    9.42    1.31
  -2  -7  12    6.69    0.51
   2   7 -11   10.33    1.59
  -2  -7  11   11.45    1.96
  -2  -7  11    9.35    0.50
   2   7 -10   11.83    0.58
   2   7 -10   10.88    1.56
  -2  -7  10   11.87    1.31
  -2  -7  10   10.89    0.48
   2   7  -9    6.69    1.24
   2   7  -9    6.59    0.39
  -2  -7   9    7.88    1.04
  -2  -7   9    6.02    0.48
   2   7  -8   17.80    0.70
   2   7  -8   20.18    1.61
  -2  -7   8   19.17    1.34
  -2  -7   8   18.25    0.52
   2   7  -7   18.63    1.47
   2   7  -7   17.50    0.45
  -2  -7   7   18.08    0.60
  -2  -7   7   17.77    1.26
   2   7  -6    0.14    0.11
   2   7  -6   -0.16    0.41
  -2  -7   6    0.24    0.54
  -2  -7   6    0.02    0.13
   2   7  -5   14.51    1.23
   2   7  -5   14.35    0.37
  -2  -7   5   14.56    1.07
  -2  -7   5   14.81    0.37
   2   7  -4   27.23    0.53
   2   7  -4   26.80    1.45
  -2  -7   4   26.19    1.28
   2   7  -3   18.26    0.44
   2   7  -3   21.13    1.18
  -2  -7   3   21.08    1.07
   2   7  -2    8.22    0.28
   2   7  -2    7.58    0.80
  -2  -7   2    8.60    0.73
   2   7  -1   34.12    0.88
   2   7  -1   35.51    0.86
   2   7  -1   33.81    1.32
  -2  -7   1   35.50    1.66
   2   7   0   99.43    2.14
   2   7   0   97.28    2.39
   2   7   0   97.54    2.53
  -2  -7   0  100.47    2.47
   2   7   1   63.40    1.77
   2   7   1   61.00    1.59
   2   7   1   61.07    1.55
  -2  -7  -1   60.12    1.59
   2   7   2   59.50    1.69
   2   7   2   60.91    1.65
  -2  -7  -2   59.31    1.76
   2   7   3   41.45    1.75
  -2  -7  -3   39.82    1.06
   2   7   4  139.50    3.53
  -2  -7  -4  138.23    2.75
   2   7   5    0.91    0.47
  -2  -7  -5    1.10    0.19
   2   7   6   10.42    0.91
  -2  -7  -6    9.76    0.34
   2   7   7    8.20    0.95
  -2  -7  -7    8.10    0.32
   2   7   8   51.39    2.18
  -2  -7  -8   47.30    0.70
   2   7   9    1.34    0.76
   2   7  10    0.67    1.04
   2   7  11    4.53    1.15
   2   7  12   36.43    2.43
   2   7  13    0.75    0.88
   2   7  14    0.00    0.41
   2   7  15   14.78    1.99
   2   7  16   -0.01    0.51
   2   8 -14    1.71    1.33
   2   8 -13   -0.11    0.87
  -2  -8  13   -0.34    0.74
   2   8 -12    1.65    1.71
  -2  -8  12    1.35    0.95
   2   8 -11    0.16    0.62
  -2  -8  11   -0.27    0.52
   2   8 -10    0.33    0.47
  -2  -8  10    0.23    0.39
  -2  -8  10    0.00    0.09
   2   8  -9    0.98    0.86
  -2  -8   9    0.92    1.13
   2   8  -8    2.83    1.00
  -2  -8   8    2.68    0.83
   2   8  -7   33.93    2.06
  -2  -8   7   32.53    1.79
   2   8  -6    5.03    1.03
  -2  -8   6    4.96    0.89
   2   8  -5    0.45    0.53
  -2  -8   5    0.13    0.45
   2   8  -4   60.53    0.85
   2   8  -4   59.64    2.33
  -2  -8   4   59.35    2.21
   2   8  -3   42.11    0.67
   2   8  -3   38.54    0.84
   2   8  -3   42.61    1.79
  -2  -8   3   45.72    1.74
   2   8  -2    6.82    0.27
   2   8  -2    8.51    0.33
   2   8  -2    7.97    0.86
  -2  -8   2    7.81    0.81
   2   8  -1   48.77    1.15
   2   8  -1   50.90    1.82
   2   8  -1   49.48    1.14
  -2  -8   1   50.53    1.70
   2   8   0    5.49    0.69
   2   8   0    5.66    0.41
   2   8   0    5.51    0.59
  -2  -8   0    6.25    0.61
   2   8   1   49.97    1.45
   2   8   1   49.07    1.34
  -2  -8  -1   49.12    1.49
   2   8   2    0.38    0.24
   2   8   2    0.01    0.25
  -2  -8  -2    0.09    0.24
   2   8   3    2.14    0.70
  -2  -8  -3    2.01    0.35
   2   8   4   39.81    1.48
  -2  -8  -4   39.77    1.09
   2   8   5   34.88    1.48
  -2  -8  -5   33.26    0.91
   2   8   6   39.13    2.31
  -2  -8  -6   37.38    0.92
   2   8   7    1.36    0.66
  -2  -8  -7    1.43    0.19
   2   8   8    6.24    1.03
  -2  -8  -8    5.63    0.33
   2   8   9   11.16    1.88
  -2  -8  -9   10.41    0.24
   2   8  10    8.92    1.30
   2   8  11    4.16    1.16
   2   8  12   15.28    1.78
   2   8  13    2.23    1.16
   2   8  14   -0.22    1.25
   2   8  15   -0.26    0.85
   2   8  16   -0.03    0.65
   2   9 -13   -0.36    0.88
  -2  -9  13   -0.07    0.74
   2   9 -12    0.47    0.99
  -2  -9  12    0.50    1.29
   2   9 -11   -0.47    0.76
  -2  -9  11    0.08    0.61
   2   9 -10    7.59    1.60
  -2  -9  10    7.72    1.35
   2   9  -9    2.69    1.93
  -2  -9   9    3.95    1.04
   2   9  -8    8.30    2.25
  -2  -9   8   10.12    1.29
   2   9  -7   34.63    3.17
  -2  -9   7   35.10    2.01
   2   9  -6   22.41    2.57
  -2  -9   6   22.57    1.56
   2   9  -5   11.13    1.85
  -2  -9   5    8.63    1.08
   2   9  -4    0.36    0.59
  -2  -9   4    0.58    0.52
   2   9  -3   32.10    1.80
   2   9  -3   33.84    0.50
  -2  -9   3   33.61    1.63
   2   9  -2    4.25    0.35
   2   9  -2    4.74    0.22
   2   9  -2    4.54    0.87
  -2  -9   2    4.82    1.16
   2   9  -1    1.79    0.25
   2   9  -1    1.71    0.24
  -2  -9   1    1.88    0.56
   2   9   0    4.67    0.39
   2   9   0    4.70    0.41
  -2  -9   0    5.05    0.65
   2   9   1   37.81    1.19
   2   9   1   39.89    1.30
  -2  -9  -1   38.53    1.88
   2   9   2    0.24    0.32
   2   9   2    0.39    0.31
  -2  -9  -2    0.54    0.32
   2   9   3    0.89    0.38
  -2  -9  -3    0.74    0.34
   2   9   4   13.91    1.33
  -2  -9  -4   12.46    0.66
   2   9   5  137.19    3.87
  -2  -9  -5  130.99    3.27
   2   9   6    1.32    0.64
  -2  -9  -6    1.68    0.45
   2   9   7    0.67    0.60
  -2  -9  -7    0.61    0.32
   2   9   8   25.88    1.68
  -2  -9  -8   24.84    0.67
   2   9   9   22.57    1.69
  -2  -9  -9   21.17    0.60
   2   9  10    0.21    0.61
   2   9  11    8.54    1.42
   2   9  12    5.39    1.40
   2   9  13   14.84    2.00
   2   9  14    1.22    1.10
   2   9  15   -0.05    0.66
   2   9  16    0.07    0.78
  -2 -10  12    0.17    0.74
   2  10 -11   -0.17    0.81
  -2 -10  11    0.36    0.68
   2  10 -10    8.09    1.75
  -2 -10  10    7.60    2.26
   2  10  -9    2.90    1.29
  -2 -10   9    2.78    1.07
   2  10  -8   -0.09    0.71
  -2 -10   8   -0.23    0.58
   2  10  -7   19.48    2.04
  -2 -10   7   20.82    1.77
   2  10  -6   59.44    3.02
  -2 -10   6   54.08    2.57
   2  10  -5   -0.16    0.45
  -2 -10   5    0.39    0.60
   2  10  -4    1.96    0.92
  -2 -10   4    2.28    0.79
  -2 -10   3    1.31    0.66
   2  10  -2   20.12    0.48
   2  10  -2   19.94    0.47
  -2 -10   2   19.87    1.34
   2  10  -1    1.43    0.23
   2  10  -1    1.57    0.25
  -2 -10   1    1.59    0.59
   2  10   0    2.53    0.52
   2  10   0    3.14    0.58
  -2 -10   0    3.05    0.63
   2  10   1   16.45    1.15
   2  10   1   17.50    0.80
  -2 -10  -1   18.63    1.53
   2  10   2    0.31    0.29
   2  10   2    0.55    0.31
  -2 -10  -2   -0.17    0.34
   2  10   3    6.59    0.70
  -2 -10  -3    6.19    0.64
   2  10   4    0.51    0.43
  -2 -10  -4    0.51    0.34
   2  10   5   43.43    2.41
  -2 -10  -5   44.81    1.76
   2  10   6    6.78    0.93
  -2 -10  -6    6.26    0.77
   2  10   7    1.63    0.72
  -2 -10  -7    1.32    0.46
   2  10   8   37.44    2.01
  -2 -10  -8   33.64    0.96
   2  10   9   54.89    3.49
  -2 -10  -9   46.59    1.30
   2  10  10    0.44    0.52
  -2 -10 -10    0.06    0.12
   2  10  11    0.67    0.83
   2  10  12    0.23    0.74
   2  10  13   22.55    2.26
   2  10  14    1.30    1.17
   2  10  15    0.96    1.14
   2  10  16    8.28    1.99
  -2 -11  11    1.38    1.12
  -2 -11  10    0.23    0.74
  -2 -11   9    6.09    1.42
  -2 -11   8    5.67    1.99
  -2 -11   7    3.87    1.11
  -2 -11   6   -0.29    0.61
  -2 -11   5   21.57    2.52
  -2 -11   4    5.38    1.07
  -2 -11   3   -0.31    0.54
   2  11  -2   24.79    0.48
   2  11  -2   27.18    0.53
  -2 -11   2   26.61    1.63
   2  11  -1    0.81    0.19
   2  11  -1    1.01    0.32
  -2 -11   1    0.69    0.58
   2  11   0   -0.05    0.10
   2  11   0   -0.02    0.09
  -2 -11   0    0.24    0.19
   2  11   1    0.98    0.50
   2  11   1    0.95    0.38
  -2 -11  -1    1.45    0.85
   2  11   2    0.45    0.48
   2  11   2    0.22    0.27
  -2 -11  -2   -0.16    0.35
   2  11   3   35.89    1.43
  -2 -11  -3   34.59    1.48
   2  11   4    0.35    0.46
  -2 -11  -4    0.72    0.39
   2  11   5    0.66    0.55
  -2 -11  -5    0.90    0.39
   2  11   6   32.84    1.75
  -2 -11  -6   33.15    1.23
   2  11   7    5.66    1.39
  -2 -11  -7    4.57    0.50
   2  11   8   10.77    1.25
  -2 -11  -8    8.63    0.57
   2  11   9   27.05    1.91
  -2 -11  -9   21.96    1.03
   2  11  10    8.05    1.36
  -2 -11 -10    6.55    0.35
   2  11  11    0.07    0.57
  -2 -11 -11    0.07    0.08
   2  11  12    0.40    0.79
   2  11  13    7.60    1.68
   2  11  14    1.78    1.27
  -2 -12  10    0.91    1.03
  -2 -12   9    0.70    0.92
  -2 -12   8    3.68    1.88
  -2 -12   7    0.05    0.51
  -2 -12   6    9.96    1.45
  -2 -12   5    2.18    1.53
  -2 -12   4    2.89    0.99
  -2 -12   3    2.06    0.87
   2  12  -2   19.08    0.38
  -2 -12   2   19.88    2.30
   2  12  -1   21.35    0.74
   2  12  -1   23.37    0.74
  -2 -12   1   23.61    1.59
   2  12   0   -0.01    0.24
   2  12   0   -0.02    0.18
  -2 -12   0    0.48    0.37
   2  12   1    0.03    0.21
   2  12   1   -0.01    0.40
  -2 -12  -1    0.42    0.37
   2  12   2    5.35    0.73
   2  12   2    5.24    0.60
  -2 -12  -2    5.51    0.83
   2  12   3   18.64    1.08
   2  12   3   19.11    1.23
  -2 -12  -3   19.06    1.22
   2  12   4    0.57    0.47
  -2 -12  -4    0.68    0.45
   2  12   5   19.20    1.31
  -2 -12  -5   18.36    1.08
   2  12   6   32.03    1.73
  -2 -12  -6   29.61    1.31
   2  12   7   16.20    1.45
  -2 -12  -7   17.87    0.94
   2  12   8    4.61    1.04
  -2 -12  -8    3.47    0.51
   2  12   9    6.84    2.00
  -2 -12  -9    6.98    0.81
   2  12  10   14.17    1.63
  -2 -12 -10   12.63    0.60
   2  12  11    0.88    0.90
   2  12  12    2.37    1.19
   2  12  13    0.19    0.82
  -2 -13   9    0.21    0.81
  -2 -13   8    1.01    1.58
  -2 -13   7    0.16    0.68
  -2 -13   6    1.09    0.91
  -2 -13   5    3.72    1.78
  -2 -13   4    5.29    1.24
  -2 -13   3   -0.44    0.68
  -2 -13   2   -0.77    1.12
   2  13  -1   17.50    0.62
   2  13  -1   17.26    0.59
  -2 -13   1   18.34    1.60
   2  13   0    0.58    0.22
   2  13   0    0.29    0.28
  -2 -13   0    0.21    0.60
   2  13   1    8.78    0.58
   2  13   1    8.12    0.75
  -2 -13  -1    8.29    1.12
   2  13   2   20.56    1.75
   2  13   2   21.37    1.44
  -2 -13  -2   21.52    2.10
   2  13   3    6.65    0.73
   2  13   3    4.46    0.88
  -2 -13  -3    6.41    1.39
   2  13   4    8.97    0.90
  -2 -13  -4    8.77    0.97
   2  13   5    3.68    0.76
  -2 -13  -5    3.35    0.69
   2  13   6    2.12    0.74
  -2 -13  -6    1.84    0.57
   2  13   7   14.89    1.46
  -2 -13  -7   17.95    1.05
   2  13   8   -0.11    0.55
  -2 -13  -8   -0.24    0.48
   2  13   9    1.66    0.89
  -2 -13  -9    1.45    0.40
   2  13  10    5.77    1.26
  -2 -13 -10    4.17    0.48
   2  13  11    8.22    1.62
   2  13  13   -0.58    0.98
  -2 -14   7    2.25    1.24
  -2 -14   6    0.59    0.89
  -2 -14   5    0.73    0.88
  -2 -14   4   10.09    1.61
  -2 -14   3    2.97    1.13
  -2 -14   2    6.14    1.26
   2  14  -1    5.73    0.42
  -2 -14   1    6.92    1.86
   2  14   0    6.51    0.61
   2  14   0    6.39    0.80
  -2 -14   0    7.90    1.23
   2  14   1    1.36    0.36
   2  14   1    0.58    0.72
  -2 -14  -1    1.62    0.76
   2  14   2    0.19    0.43
   2  14   2    0.11    0.37
  -2 -14  -2    0.28    0.49
   2  14   3    6.69    0.92
   2  14   3    5.25    0.70
  -2 -14  -3    5.85    1.49
   2  14   4   15.06    1.35
   2  14   4   12.49    1.05
  -2 -14  -4   13.93    1.86
   2  14   5   -0.07    0.69
  -2 -14  -5   -0.50    0.71
   2  14   6    2.05    1.20
  -2 -14  -6    1.88    1.00
   2  14   7    9.53    1.94
  -2 -14  -7    9.98    1.41
   2  14   8    5.19    1.69
  -2 -14  -8    4.02    0.67
   2  14   9    4.15    1.76
  -2 -14  -9    3.14    0.58
   2  14  10    2.58    1.70
   2  14  11    4.77    1.38
   2  14  12   -0.04    0.59
  -2 -15   6    0.51    0.93
  -2 -15   5   -0.42    0.85
  -2 -15   4    1.85    1.77
  -2 -15   3    6.52    1.48
  -2 -15   2    0.64    0.84
  -2 -15   1   -0.06    0.53
  -2 -15   0   22.27    1.93
   2  15   1    1.60    0.55
   2  15   1    1.39    0.50
  -2 -15  -1    2.02    0.89
   2  15   2    1.05    0.65
   2  15   2    1.04    0.89
  -2 -15  -2    1.96    0.81
   2  15   3    0.17    0.38
   2  15   3    0.37    0.82
  -2 -15  -3    0.81    0.59
   2  15   4    8.37    1.89
   2  15   4   10.62    1.41
  -2 -15  -4    9.94    1.24
   2  15   5   -0.03    0.45
   2  15   5   -0.08    0.34
  -2 -15  -5    0.00    0.36
   2  15   6    4.14    0.96
  -2 -15  -6    5.35    0.88
   2  15   7   -0.19    0.50
  -2 -15  -7   -0.09    0.39
   2  15   8    6.18    1.20
  -2 -15  -8    5.20    0.84
   2  15   9    0.58    0.77
   2  15  10    4.22    1.29
  -2 -16   3    6.15    1.57
  -2 -16   2    0.03    0.53
  -2 -16   1    0.08    0.61
  -2 -16   0    0.00    0.35
  -2 -16  -1    4.79    1.95
  -2 -16  -2    0.73    0.79
   2  16   3    0.14    0.40
   2  16   3    0.04    0.29
  -2 -16  -3    0.05    0.49
   2  16   4    1.07    0.94
   2  16   4    1.27    0.85
  -2 -16  -4    2.47    0.85
   2  16   5    3.75    0.87
   2  16   5    3.22    1.75
  -2 -16  -5    4.54    1.02
   2  16   6    0.55    0.62
   2  16   6    0.73    0.84
  -2 -16  -6    0.69    0.62
   2  16   7    2.61    0.90
  -2 -16  -7    2.15    0.78
   2  16   8    0.05    0.61
  -2 -16  -8    0.33    0.47
  -2 -17  -1    0.06    0.60
  -2 -17  -2    0.03    0.78
  -2 -17  -3    0.64    1.27
   2  17   4    0.35    0.69
   2  17   4    0.34    0.60
  -2 -17  -4   -0.18    1.03
   3 -16  -4   -0.01    0.96
   3 -16  -4    0.55    0.86
  -3  16   4    0.08    0.78
   3 -16  -3   -0.26    1.11
   3 -16  -3   -0.19    0.49
  -3  16   3    0.02    0.37
   3 -16  -2    1.84    1.10
   3 -16  -2    8.52    1.72
  -3  16   2    7.28    0.85
   3 -16  -1    2.06    1.36
   3 -16   0    1.02    1.18
   3 -16   1    0.97    1.23
   3 -15  -7    0.01    0.49
  -3  15   7    0.11    0.76
   3 -15  -6    0.07    0.45
  -3  15   6    0.00    0.44
   3 -15  -5   12.71    1.59
  -3  15   5   13.86    1.39
   3 -15  -4   -0.36    0.52
  -3  15   4    0.48    0.44
   3 -15  -3    0.20    0.57
   3 -15  -3    0.70    0.86
  -3  15   3    0.26    0.72
   3 -15  -2    1.84    0.70
   3 -15  -2    0.51    1.15
  -3  15   2    1.20    0.84
   3 -15  -1    9.60    2.81
   3 -15  -1    5.25    1.54
  -3  15   1   10.04    1.30
   3 -15   0    3.26    1.38
   3 -15   1    1.86    1.27
   3 -15   2    8.40    1.90
   3 -15   3    1.50    1.27
   3 -15   4    1.12    1.96
   3 -15   5    0.96    1.28
   3 -14  -9    0.05    1.14
  -3  14   9    0.34    0.75
   3 -14  -8   12.99    1.66
  -3  14   8   16.97    1.79
   3 -14  -7    0.00    0.50
  -3  14   7    0.19    0.53
   3 -14  -6   -0.01    0.36
  -3  14   6    0.07    0.57
   3 -14  -5   17.81    1.55
  -3  14   5   24.40    1.61
   3 -14  -4    1.42    0.82
  -3  14   4    2.86    1.09
   3 -14  -3    0.50    0.55
  -3  14   3    0.44    0.48
   3 -14  -2   -0.08    0.45
  -3  14   2    0.43    0.37
   3 -14  -1   13.27    1.16
   3 -14  -1   18.70    2.06
  -3  14   1   16.03    0.98
   3 -14   0    6.57    1.41
   3 -14   0    3.54    1.08
  -3  14   0    3.50    0.61
   3 -14   1    6.42    0.79
   3 -14   1   11.36    1.69
  -3  14  -1    8.59    0.72
   3 -14   2    0.03    0.59
   3 -14   3    0.94    1.65
   3 -14   4    4.06    1.55
   3 -14   5   -0.03    0.96
   3 -14   6    6.64    1.83
   3 -14   7    0.15    1.38
   3 -13 -11    4.09    2.44
  -3  13  11    7.73    1.67
   3 -13 -10   -0.02    0.85
  -3  13  10    1.17    0.88
   3 -13  -9    0.02    0.45
  -3  13   9    0.02    0.47
   3 -13  -8   11.46    1.37
  -3  13   8   -0.04    2.13
   3 -13  -7   -0.10    1.68
  -3  13   7    8.08    1.18
   3 -13  -6   -0.04    1.41
  -3  13   6    5.76    0.97
   3 -13  -5    2.81    0.82
  -3  13   5    4.25    1.29
   3 -13  -4    7.03    1.01
  -3  13   4   10.40    1.01
   3 -13  -3    0.11    0.43
  -3  13   3    0.31    0.59
   3 -13  -2    4.61    0.80
  -3  13   2    4.89    1.02
   3 -13  -1    0.65    0.45
  -3  13   1    0.39    0.56
   3 -13   0   14.47    1.87
   3 -13   0   11.70    1.37
  -3  13   0   13.89    0.85
   3 -13   1    0.02    0.69
   3 -13   1    0.14    0.29
  -3  13  -1    0.24    0.40
   3 -13   2    4.18    0.77
   3 -13   2    5.95    1.33
  -3  13  -2    3.58    0.75
   3 -13   3    0.43    0.73
  -3  13  -3    0.16    0.32
   3 -13   4   20.12    2.20
   3 -13   5    4.83    1.54
   3 -13   6    0.82    1.07
   3 -13   7   11.09    2.04
   3 -13   8    0.19    0.86
   3 -13   9    1.51    1.31
   3 -12 -12    0.43    1.07
  -3  12  12    1.32    1.06
   3 -12 -11    8.88    1.74
  -3  12  11   11.84    1.79
   3 -12 -10    0.19    0.72
  -3  12  10    0.40    0.74
   3 -12  -9    0.63    1.38
  -3  12   9    1.71    0.94
   3 -12  -8    0.12    0.60
  -3  12   8    0.52    0.65
   3 -12  -7   11.47    1.33
  -3  12   7   13.93    1.39
   3 -12  -6   -0.24    0.39
  -3  12   6    0.13    0.40
   3 -12  -5    1.98    1.10
  -3  12   5    2.10    0.73
   3 -12  -4    6.62    1.39
  -3  12   4   10.86    1.43
   3 -12  -3    1.44    0.58
  -3  12   3    1.89    0.54
   3 -12  -2    0.89    0.55
  -3  12   2    1.67    0.46
   3 -12  -1   -0.06    0.27
  -3  12   1   -0.04    0.23
   3 -12   0    8.13    0.76
  -3  12   0    8.84    0.66
   3 -12   1    9.04    1.06
  -3  12  -1    9.84    0.69
   3 -12   2    6.08    0.56
   3 -12   2    8.11    1.47
  -3  12  -2    7.56    0.57
   3 -12   3    1.50    0.48
   3 -12   3    2.24    1.03
  -3  12  -3    1.62    0.52
   3 -12   4   13.58    0.67
   3 -12   4   16.99    1.87
  -3  12  -4   14.20    0.72
   3 -12   5   11.75    1.83
   3 -12   6    1.87    1.20
   3 -12   7    5.19    1.57
   3 -12   8    8.77    1.78
   3 -12   9    1.70    1.25
   3 -12  10    0.70    1.67
   3 -11 -13    0.05    0.91
  -3  11  13    0.60    0.90
   3 -11 -12    0.53    0.72
  -3  11  12   -0.23    0.75
   3 -11 -11   10.17    1.71
  -3  11  11   11.20    1.72
   3 -11 -10    3.55    1.16
  -3  11  10    3.54    1.17
   3 -11  -9    3.34    1.09
  -3  11   9    4.36    1.11
   3 -11  -8    0.70    0.82
  -3  11   8    2.40    0.84
   3 -11  -7    0.30    0.80
  -3  11   7    0.27    0.54
   3 -11  -6    1.76    0.74
  -3  11   6    2.86    0.76
   3 -11  -5   -0.24    0.38
  -3  11   5    0.00    0.39
   3 -11  -4    0.80    0.56
  -3  11   4    1.90    0.55
   3 -11  -3   13.36    1.44
  -3  11   3   17.98    1.03
   3 -11  -2   -0.37    0.21
  -3  11   2    0.39    0.21
   3 -11  -1    1.21    0.41
  -3  11   1    1.37    0.39
   3 -11   0    6.58    0.62
  -3  11   0    5.83    0.56
   3 -11   1   12.22    0.73
  -3  11  -1   13.46    0.98
   3 -11   2    0.94    0.30
  -3  11  -2    0.52    0.46
   3 -11   3   -0.21    0.69
   3 -11   3    0.36    0.31
  -3  11  -3    0.28    0.24
   3 -11   4    9.42    0.45
   3 -11   4   12.88    1.54
  -3  11  -4   11.40    0.54
   3 -11   5   11.63    0.41
   3 -11   5   15.79    1.73
   3 -11   6    0.36    0.77
   3 -11   7    3.30    1.90
   3 -11   8    9.50    1.68
   3 -11   9    6.79    1.56
   3 -11  10    1.82    1.19
   3 -10 -14    7.20    1.81
  -3  10  14    7.04    2.75
   3 -10 -13    1.99    1.33
  -3  10  13    3.71    2.05
   3 -10 -12    9.01    1.71
  -3  10  12    9.92    2.59
   3 -10 -11    0.55    0.85
  -3  10  11    0.84    1.32
   3 -10 -10   19.17    1.85
  -3  10  10   22.56    2.76
   3 -10  -9    0.15    0.71
  -3  10   9   -0.24    0.70
   3 -10  -8    3.54    0.95
  -3  10   8    4.58    1.00
   3 -10  -7    1.11    0.71
  -3  10   7    2.08    0.73
   3 -10  -6    4.76    0.91
  -3  10   6    7.21    0.92
   3 -10  -5   -0.01    0.29
  -3  10   5    0.19    0.49
   3 -10  -4    0.32    0.34
  -3  10   4   -0.04    0.35
   3 -10  -3   16.14    1.00
  -3  10   3   19.35    1.02
   3 -10  -2   34.38    1.72
  -3  10   2   40.20    1.77
   3 -10  -1    0.82    0.35
  -3  10   1    1.07    0.54
   3 -10   0    2.23    0.38
  -3  10   0    2.12    0.62
   3 -10   1   15.45    0.70
  -3  10  -1   16.30    0.74
   3 -10   2    1.51    0.47
  -3  10  -2    1.27    0.33
   3 -10   3    5.53    1.17
   3 -10   3    5.29    0.55
  -3  10  -3    3.92    0.64
   3 -10   4    0.46    0.77
   3 -10   4    0.90    0.30
  -3  10  -4    0.49    0.37
   3 -10   5    8.26    0.32
   3 -10   5   10.35    1.37
  -3  10  -5    7.83    0.41
   3 -10   6    7.88    0.29
   3 -10   6    7.81    2.04
   3 -10   6    7.11    0.25
   3 -10   7    1.83    1.00
   3 -10   8    7.48    1.44
   3 -10   9    5.92    2.14
   3 -10  10    0.62    0.89
   3 -10  11    1.11    1.01
   3  -9 -14    0.17    0.91
   3  -9 -14    0.21    0.52
  -3   9  14    1.13    1.36
   3  -9 -13   19.25    2.21
  -3   9  13   17.55    2.12
   3  -9 -12    2.76    1.17
  -3   9  12    2.19    1.14
   3  -9 -11    2.00    1.10
  -3   9  11    2.72    1.09
   3  -9 -10   14.46    2.43
  -3   9  10   16.51    1.65
   3  -9  -9    1.17    0.73
  -3   9   9    0.62    0.73
   3  -9  -8   -0.44    0.56
  -3   9   8   -0.17    0.88
   3  -9  -7    0.20    0.70
  -3   9   7    0.23    0.48
   3  -9  -6   24.17    1.44
  -3   9   6   27.31    1.49
   3  -9  -5   18.27    1.15
  -3   9   5   19.23    1.19
   3  -9  -4    0.68    0.46
  -3   9   4    1.63    0.50
   3  -9  -3    5.80    0.65
  -3   9   3    7.46    1.02
   3  -9  -2   14.20    1.11
  -3   9   2   16.65    0.85
   3  -9  -1   28.41    1.04
  -3   9   1   30.60    1.05
   3  -9   0   12.63    0.64
  -3   9   0   13.16    0.92
   3  -9   1   91.35    2.31
  -3   9  -1   92.78    2.21
   3  -9   2   46.11    1.15
  -3   9  -2   48.02    1.33
   3  -9   3   13.94    0.67
  -3   9  -3   13.88    0.63
   3  -9   4    0.12    0.15
   3  -9   4   -0.06    0.43
  -3   9  -4   -0.02    0.16
   3  -9   5    2.20    0.18
   3  -9   5    1.64    1.33
  -3   9  -5    2.19    0.44
   3  -9   6    1.66    0.14
   3  -9   6    2.46    0.84
   3  -9   7    1.20    0.10
   3  -9   7    1.34    0.15
   3  -9   7    1.41    0.82
   3  -9   8    1.33    0.86
   3  -9   9   20.40    1.87
   3  -9  10    0.32    0.69
   3  -9  11    2.30    1.08
   3  -9  12   -0.23    0.70
   3  -9  14    0.00    0.37
   3  -8 -15   -0.01    0.37
   3  -8 -15   -0.16    0.64
  -3   8  15    0.11    0.92
   3  -8 -14   -0.25    0.38
   3  -8 -14   -0.62    0.63
  -3   8  14    1.00    0.62
   3  -8 -13    1.78    1.87
  -3   8  13    2.30    1.13
   3  -8 -12    1.50    1.07
  -3   8  12    2.09    1.01
   3  -8 -11    6.47    1.34
  -3   8  11    7.00    1.29
   3  -8 -10    7.35    1.27
  -3   8  10    7.66    1.23
   3  -8  -9   16.43    1.45
  -3   8   9   14.38    1.42
   3  -8  -8    8.74    1.10
  -3   8   8    9.17    1.11
   3  -8  -7   10.54    1.11
  -3   8   7   15.53    1.70
   3  -8  -6    2.93    1.09
  -3   8   6    4.60    0.76
   3  -8  -5   22.69    1.19
  -3   8   5   25.40    1.28
   3  -8  -4    4.36    0.93
  -3   8   4    4.48    0.65
   3  -8  -3   10.03    0.69
  -3   8   3   10.05    0.74
   3  -8  -2    7.10    0.82
  -3   8   2    6.26    0.56
   3  -8  -1   27.90    0.93
  -3   8   1   28.25    0.98
   3  -8   0   10.60    0.74
  -3   8   0    8.89    0.54
   3  -8   1    0.21    0.19
  -3   8  -1    0.67    0.23
   3  -8   2  171.38    3.54
  -3   8  -2  169.42    3.65
   3  -8   3   16.62    0.50
  -3   8  -3   17.69    0.70
   3  -8   4    6.73    0.29
  -3   8  -4    6.93    0.47
   3  -8   5    0.27    0.43
   3  -8   5    0.02    0.09
  -3   8  -5    0.25    0.16
   3  -8   6    4.89    0.32
   3  -8   6    7.57    1.02
   3  -8   7    2.71    0.29
   3  -8   7    2.40    0.25
   3  -8   7    2.81    0.88
   3  -8   8    1.46    0.21
   3  -8   8    1.54    0.22
   3  -8   8    1.42    1.24
   3  -8   9    0.45    0.17
   3  -8   9    0.24    0.65
   3  -8   9    0.45    0.16
   3  -8  10   31.93    0.79
   3  -8  10   29.00    0.76
   3  -8  10   31.87    2.10
   3  -8  11    0.64    0.71
   3  -8  11    0.46    0.19
   3  -8  11    0.44    0.23
   3  -8  12    1.38    0.93
   3  -8  13    2.69    1.06
   3  -8  14    0.00    0.36
   3  -7 -15    2.17    1.24
   3  -7 -15    2.90    1.33
  -3   7  15    0.67    1.86
   3  -7 -14    4.86    1.48
   3  -7 -14    3.58    1.38
  -3   7  14    4.81    1.32
   3  -7 -13   15.35    1.84
   3  -7 -13   12.73    1.22
  -3   7  13   16.06    1.73
   3  -7 -12    8.00    1.54
  -3   7  12    8.88    1.39
   3  -7 -11    0.26    0.59
  -3   7  11    0.08    0.56
   3  -7 -10    0.38    0.61
  -3   7  10    0.21    0.58
   3  -7  -9    4.86    1.49
  -3   7   9    4.75    0.94
   3  -7  -8   36.74    1.87
  -3   7   8   42.26    1.92
   3  -7  -7   23.62    1.92
  -3   7   7   26.08    2.07
   3  -7  -6   10.52    0.94
  -3   7   6   11.86    0.97
   3  -7  -5   12.83    1.26
  -3   7   5   13.31    0.94
   3  -7  -4    2.49    0.48
  -3   7   4    3.01    0.81
   3  -7  -3    6.68    0.56
  -3   7   3    6.99    0.61
   3  -7  -2    9.26    0.56
  -3   7   2    8.37    0.59
   3  -7  -1   99.90    2.16
  -3   7   1   85.40    2.05
   3  -7   0    4.93    0.36
  -3   7   0    4.18    0.41
   3  -7   1  106.47    2.34
  -3   7  -1  100.22    2.24
   3  -7   2    4.30    0.28
  -3   7  -2    3.71    0.38
   3  -7   3   83.47    1.60
  -3   7  -3   84.37    1.95
   3  -7   4    0.25    0.13
  -3   7  -4    0.62    0.22
   3  -7   5   14.87    1.24
   3  -7   5   13.08    0.55
  -3   7  -5   13.02    0.61
   3  -7   6    0.10    0.17
   3  -7   6    0.69    0.66
   3  -7   7   12.70    1.17
   3  -7   7   10.86    0.37
   3  -7   8    0.10    0.12
   3  -7   8    0.13    0.28
   3  -7   8    0.83    0.46
   3  -7   9    0.95    0.67
   3  -7   9    0.46    0.42
   3  -7   9    0.93    0.18
   3  -7  10   11.15    1.24
   3  -7  10    8.81    0.44
   3  -7  10    9.86    0.58
   3  -7  11   25.15    2.55
   3  -7  11   22.98    0.80
   3  -7  11   24.65    1.21
   3  -7  12    2.30    0.89
   3  -7  12    1.73    0.36
   3  -7  12    2.01    0.50
   3  -7  13    2.02    0.91
   3  -7  14    0.00    0.33
   3  -7  15    0.00    0.42
   3  -6 -16    0.43    0.58
   3  -6 -16    0.07    1.38
  -3   6  16   -0.03    0.79
   3  -6 -15    1.25    1.16
   3  -6 -15    1.36    0.72
  -3   6  15    1.55    1.63
   3  -6 -14    0.44    0.49
   3  -6 -14    0.00    1.18
  -3   6  14   -0.05    0.70
   3  -6 -13   16.43    1.88
   3  -6 -13   15.96    1.27
  -3   6  13   17.57    1.75
   3  -6 -12   17.88    2.66
  -3   6  12   18.50    1.71
   3  -6 -11    8.15    1.27
  -3   6  11    6.37    1.17
   3  -6 -10    1.49    0.83
  -3   6  10    2.13    0.79
   3  -6  -9    0.77    0.62
  -3   6   9    0.73    0.61
   3  -6  -8   40.49    2.60
  -3   6   8   39.78    1.83
   3  -6  -7    1.65    0.62
  -3   6   7    2.77    0.99
   3  -6  -6    2.98    0.90
  -3   6   6    3.15    0.63
   3  -6  -5   90.97    2.46
  -3   6   5   90.43    2.49
   3  -6  -4   17.10    0.84
  -3   6   4   18.75    1.29
   3  -6  -3    6.84    0.78
  -3   6   3    6.16    0.56
   3  -6  -2    5.56    0.45
  -3   6   2    5.26    0.47
   3  -6  -1   11.25    0.51
  -3   6   1   11.38    0.56
   3  -6   0    9.40    0.45
  -3   6   0    9.68    0.71
   3  -6   1   36.56    0.87
  -3   6  -1   36.29    1.00
   3  -6   2    2.90    0.25
  -3   6  -2    3.12    0.33
   3  -6   3   52.91    1.10
  -3   6  -3   54.14    1.60
   3  -6   4   33.05    0.92
  -3   6  -4   33.70    1.01
   3  -6   5    0.70    0.17
  -3   6  -5    0.78    0.26
   3  -6   6   -0.06    0.44
   3  -6   6    0.31    0.14
   3  -6   7    3.71    0.43
   3  -6   7    3.32    0.78
   3  -6   8    0.58    0.58
   3  -6   8    0.88    0.29
   3  -6   8    0.73    0.34
   3  -6   9    0.12    0.26
   3  -6   9   -0.20    0.33
   3  -6   9    0.62    0.42
   3  -6  10    4.24    0.47
   3  -6  10    3.75    0.84
   3  -6  10    1.27    0.60
   3  -6  11   13.20    1.31
   3  -6  11   14.25    1.17
   3  -6  11   12.66    0.71
   3  -6  12   -0.22    0.42
   3  -6  12   -0.40    0.80
   3  -6  12   -0.11    0.46
   3  -6  13    0.48    0.52
   3  -6  13   -0.10    0.49
   3  -6  13    0.18    0.29
   3  -6  14    5.83    0.68
   3  -6  14    4.41    1.00
   3  -6  14    0.00    1.06
   3  -6  15   -0.01    0.36
   3  -6  16    0.00    0.50
   3  -5 -16    0.41    0.62
   3  -5 -16    0.02    1.39
  -3   5  16    0.29    0.79
   3  -5 -15    4.23    0.97
   3  -5 -15    3.10    1.44
  -3   5  15    4.09    1.26
   3  -5 -14    1.62    1.67
   3  -5 -14    1.64    0.72
  -3   5  14    1.78    1.50
   3  -5 -13    0.14    0.56
   3  -5 -13    1.24    0.86
  -3   5  13    1.34    0.76
   3  -5 -12    7.28    0.93
   3  -5 -12    7.34    2.03
  -3   5  12    8.65    1.20
   3  -5 -11   18.87    1.66
  -3   5  11   18.74    1.52
   3  -5 -10   -0.25    0.21
  -3   5  10    0.21    0.20
   3  -5  -9   20.16    1.45
  -3   5   9   21.39    1.40
   3  -5  -8   42.10    1.87
  -3   5   8   44.70    1.83
   3  -5  -7   72.75    2.99
  -3   5   7   69.63    2.95
   3  -5  -6   49.59    1.66
  -3   5   6   48.00    1.69
   3  -5  -5   17.03    0.88
  -3   5   5   16.99    0.91
   3  -5  -4   68.01    2.18
  -3   5   4   65.73    1.81
   3  -5  -3    1.06    0.30
  -3   5   3    0.71    0.32
   3  -5  -2   20.44    0.71
  -3   5   2   19.23    0.75
   3  -5  -1   -0.02    0.12
  -3   5   1    0.05    0.13
   3  -5   0    8.97    0.42
  -3   5   0    8.28    0.48
   3  -5   1    6.45    0.51
  -3   5  -1    6.43    0.60
   3  -5   2    0.54    0.17
  -3   5  -2    0.33    0.34
   3  -5   3    7.10    0.34
  -3   5  -3    6.81    0.45
   3  -5   4  195.02    3.91
  -3   5  -4  194.99    4.45
   3  -5   5   19.46    0.59
  -3   5  -5   20.70    0.79
   3  -5   6    0.73    0.45
   3  -5   6    0.47    0.29
   3  -5   7    9.01    0.85
   3  -5   7    7.51    0.43
   3  -5   8    1.75    0.40
   3  -5   8    2.42    0.63
   3  -5   8    2.19    0.33
   3  -5   9    0.03    0.18
   3  -5   9   -0.03    0.21
   3  -5   9   -0.36    0.32
   3  -5  10    1.18    0.57
   3  -5  10    1.11    0.52
   3  -5  10    0.90    0.40
   3  -5  11   17.13    0.91
   3  -5  11   18.67    1.34
   3  -5  11   17.78    1.42
   3  -5  12    2.63    0.81
   3  -5  12    1.79    1.06
   3  -5  12    1.40    0.73
   3  -5  13   -0.09    0.89
   3  -5  13    0.73    0.43
   3  -5  13    0.48    0.66
   3  -5  14    0.13    0.44
   3  -5  14   -0.03    0.53
   3  -5  14    0.12    0.34
   3  -5  15    9.38    1.24
   3  -5  15   10.34    1.52
   3  -5  15   11.33    1.10
   3  -5  16   -0.06    0.31
   3  -5  16   -0.04    0.35
   3  -5  16    0.29    0.40
   3  -4 -16   -0.15    0.57
   3  -4 -16   -0.12    0.77
  -3   4  16   -0.24    0.66
   3  -4 -15    4.27    1.49
   3  -4 -15    5.95    1.61
  -3   4  15    5.82    1.26
   3  -4 -14    4.87    1.41
   3  -4 -14    4.19    1.28
  -3   4  14    3.77    1.73
   3  -4 -13    0.77    0.51
   3  -4 -13   -0.25    0.36
  -3   4  13   -0.12    0.70
   3  -4 -12    2.45    0.70
   3  -4 -12    3.18    0.99
  -3   4  12    2.51    0.89
   3  -4 -11   32.18    2.02
   3  -4 -11   33.83    1.58
  -3   4  11   33.03    1.81
   3  -4 -10    2.57    0.83
  -3   4  10    2.94    0.76
   3  -4  -9   16.81    1.89
  -3   4   9   16.63    1.21
   3  -4  -8    1.10    0.57
  -3   4   8    1.18    0.86
   3  -4  -7  150.17    3.92
  -3   4   7  152.00    3.83
   3  -4  -6    7.29    1.03
  -3   4   6    6.98    0.69
   3  -4  -5   98.97    2.45
  -3   4   5   98.58    2.48
   3  -4  -4    8.81    0.58
  -3   4   4    7.78    0.61
   3  -4  -3   19.02    0.73
  -3   4   3   18.75    1.07
   3  -4  -2    4.94    0.39
  -3   4   2    4.46    0.63
   3  -4  -1   16.91    0.60
  -3   4   1   16.03    0.63
   3  -4   0    9.43    0.63
  -3   4   0    9.93    0.49
   3  -4   1  132.53    2.54
  -3   4  -1  135.56    2.76
   3  -4   2   35.16    1.04
  -3   4  -2   34.18    0.95
   3  -4   3    2.00    0.25
  -3   4  -3    2.55    0.33
   3  -4   4  469.86    9.31
  -3   4  -4  468.90   10.00
   3  -4   5   10.42    0.48
  -3   4  -5   11.97    0.62
   3  -4   6    5.19    0.65
   3  -4   6    4.77    0.57
   3  -4   7    2.76    0.36
   3  -4   7    3.17    0.57
   3  -4   8    2.75    0.58
   3  -4   8    2.46    0.46
   3  -4   8    2.19    0.38
   3  -4   9    0.05    0.27
   3  -4   9    0.21    0.22
   3  -4   9   -0.27    0.24
   3  -4  10    1.44    0.44
   3  -4  10    2.03    0.58
   3  -4  10    1.91    0.48
   3  -4  11    9.15    0.97
   3  -4  11    8.08    1.15
   3  -4  11    9.53    0.82
   3  -4  12    9.59    1.01
   3  -4  12   10.41    0.91
   3  -4  12   10.72    0.95
   3  -4  13    1.05    0.58
   3  -4  13    0.46    0.53
   3  -4  13    1.52    0.55
   3  -4  14    2.29    1.15
   3  -4  14    2.97    0.71
   3  -4  14    2.67    0.74
   3  -4  15    7.27    1.57
   3  -4  15    8.09    1.11
   3  -4  15    8.92    1.52
   3  -4  16    6.64    1.08
   3  -4  16    6.49    1.63
   3  -4  16    8.37    1.16
   3  -4  17    0.91    0.60
   3  -4  17    0.67    0.63
   3  -4  17   -0.15    0.70
   3  -3 -16    3.54    0.91
   3  -3 -16   -0.03    1.12
  -3   3  16    0.03    0.96
   3  -3 -15   -0.35    0.57
   3  -3 -15    0.27    0.72
  -3   3  15    0.84    0.61
   3  -3 -14    5.78    0.97
   3  -3 -14    4.99    1.31
  -3   3  14    4.50    1.11
   3  -3 -13    4.65    1.34
   3  -3 -13    5.19    1.19
  -3   3  13    4.31    0.99
   3  -3 -12    1.57    0.61
   3  -3 -12    1.21    0.82
  -3   3  12    0.91    1.07
   3  -3 -11    2.68    0.65
   3  -3 -11    2.41    1.36
  -3   3  11    2.51    1.17
   3  -3 -10    0.57    0.45
   3  -3 -10    0.85    0.57
  -3   3  10    0.27    0.82
   3  -3  -9    1.16    0.58
  -3   3   9    1.03    0.85
   3  -3  -8   11.53    1.45
  -3   3   8   10.63    0.90
   3  -3  -7   41.70    1.55
  -3   3   7   40.01    1.46
   3  -3  -6   63.09    1.82
  -3   3   6   61.24    1.79
   3  -3  -5    1.43    0.37
  -3   3   5    1.16    0.60
   3  -3  -4    3.39    0.42
  -3   3   4    3.67    0.45
   3  -3  -3  100.88    2.16
  -3   3   3   95.18    2.14
   3  -3  -2    1.81    0.30
  -3   3   2    1.88    0.32
   3  -3  -1   10.24    0.46
  -3   3   1    9.86    0.49
   3  -3   0    0.32    0.20
  -3   3   0    0.62    0.22
   3  -3   1    2.04    0.41
  -3   3  -1    2.24    0.47
   3  -3   2   73.57    1.52
  -3   3  -2   72.78    1.70
   3  -3   3  134.00    2.66
  -3   3  -3  134.00    2.89
   3  -3   4  250.61    5.24
  -3   3  -4  246.75    5.27
   3  -3   5  170.70    3.56
  -3   3  -5  167.91    4.13
   3  -3   6   59.73    1.78
   3  -3   7    4.00    0.63
   3  -3   7    4.09    0.54
   3  -3   8    0.34    0.30
   3  -3   8    0.34    0.26
   3  -3   8    0.09    0.32
   3  -3   9   10.01    0.80
   3  -3   9   10.64    0.74
   3  -3   9   10.56    0.81
   3  -3  10    0.23    0.54
   3  -3  10   -0.44    0.35
   3  -3  10   -0.46    0.52
   3  -3  11    2.58    0.62
   3  -3  11    2.82    0.59
   3  -3  11    2.46    0.96
   3  -3  12   34.36    1.55
   3  -3  12   34.13    2.22
   3  -3  12   33.45    1.58
   3  -3  13    2.84    0.65
   3  -3  13    2.50    0.71
   3  -3  13    2.42    1.18
   3  -3  14    0.65    0.47
   3  -3  14    0.47    0.56
   3  -3  14    0.37    0.55
   3  -3  15    1.62    0.54
   3  -3  15    0.12    0.65
   3  -3  15    0.41    0.65
   3  -3  16   14.41    1.56
   3  -3  16   16.54    1.28
   3  -3  16   17.07    1.49
   3  -3  17    0.40    0.46
   3  -3  17   -0.33    0.64
   3  -3  17   -0.20    0.56
   3  -2 -16    0.36    0.80
   3  -2 -16   -0.13    0.97
  -3   2  16    0.00    0.51
   3  -2 -15    2.28    0.77
   3  -2 -15   -0.02    0.91
  -3   2  15    0.02    0.75
   3  -2 -14    5.46    1.32
   3  -2 -14    6.58    1.12
  -3   2  14    7.69    1.12
   3  -2 -13    3.64    0.84
   3  -2 -13    3.54    1.06
  -3   2  13    3.81    0.88
   3  -2 -12    0.47    0.70
   3  -2 -12    0.13    0.56
  -3   2  12    0.27    0.47
   3  -2 -11    0.95    0.49
   3  -2 -11    0.28    0.92
  -3   2  11    0.40    0.52
   3  -2 -10    2.91    0.63
   3  -2 -10    1.95    0.75
  -3   2  10    2.56    0.66
   3  -2  -9   -0.45    0.31
   3  -2  -9   -0.12    0.36
  -3   2   9    0.24    0.32
   3  -2  -8    5.46    0.69
  -3   2   8    4.28    0.64
   3  -2  -7   16.56    1.32
  -3   2   7   13.58    0.84
   3  -2  -6  109.35    2.68
  -3   2   6  108.83    2.59
   3  -2  -5    2.69    0.41
  -3   2   5    2.34    0.41
   3  -2  -4   17.36    0.71
  -3   2   4   15.78    1.00
   3  -2  -3  142.90    2.86
  -3   2   3  134.80    2.82
   3  -2  -2    1.04    0.27
  -3   2   2    1.18    0.28
   3  -2  -1   15.63    0.81
  -3   2   1   15.15    0.61
   3  -2   0   55.58    1.25
  -3   2   0   52.22    1.24
   3  -2   1    0.87    0.23
  -3   2  -1    0.85    0.25
   3  -2   2   35.58    0.93
  -3   2  -2   34.94    1.32
   3  -2   3    4.03    0.35
  -3   2  -3    3.65    0.42
   3  -2   4   76.73    1.76
  -3   2  -4   76.44    1.93
   3  -2   5  503.86   10.54
  -3   2  -5  491.72   10.79
   3  -2   6   56.44    1.53
   3  -2   7   52.92    1.58
   3  -2   7   53.19    1.84
   3  -2   8    0.61    0.45
   3  -2   8    0.11    0.33
   3  -2   8    0.32    0.28
   3  -2   9    2.93    0.53
   3  -2   9    3.14    0.59
   3  -2   9    3.32    0.49
   3  -2  10    3.36    0.91
   3  -2  10    2.91    0.78
   3  -2  10    2.72    0.98
   3  -2  11    6.05    0.66
   3  -2  11    5.98    0.79
   3  -2  11    6.63    1.27
   3  -2  12    4.42    0.82
   3  -2  12    5.02    0.85
   3  -2  12    4.57    0.63
   3  -2  13    9.94    1.19
   3  -2  13   10.15    0.80
   3  -2  13    9.69    1.11
   3  -2  14    3.59    0.63
   3  -2  14    3.75    0.92
   3  -2  14    3.92    0.93
   3  -2  15    2.39    0.95
   3  -2  15    2.43    0.91
   3  -2  15    3.21    0.90
   3  -2  16   14.58    1.62
   3  -2  16   14.06    1.65
   3  -2  16   17.46    2.31
   3  -2  17    7.54    1.37
   3  -2  17    6.47    1.27
   3  -2  17    5.27    0.92
   3  -1 -16    0.79    0.88
   3  -1 -16   -0.24    1.50
  -3   1  16    1.22    0.76
   3  -1 -15    5.67    1.01
   3  -1 -15    0.07    1.12
  -3   1  15    0.00    1.36
   3  -1 -14    0.25    0.52
   3  -1 -14   -0.22    0.57
  -3   1  14    0.29    0.46
   3  -1 -13   14.51    1.34
   3  -1 -13   11.01    1.46
  -3   1  13   13.76    1.22
   3  -1 -12    1.29    0.59
   3  -1 -12    0.64    0.67
  -3   1  12    0.55    0.55
   3  -1 -11    1.39    0.98
   3  -1 -11    1.18    1.06
  -3   1  11    1.96    0.59
   3  -1 -10   10.16    1.05
   3  -1 -10   10.13    0.96
  -3   1  10   11.43    0.92
   3  -1  -9    6.01    0.72
   3  -1  -9    4.78    0.77
  -3   1   9    4.45    0.65
   3  -1  -8   -0.14    0.30
   3  -1  -8   -0.18    0.31
  -3   1   8   -0.07    0.28
   3  -1  -7    0.23    0.29
  -3   1   7    0.29    0.43
  -3   1   7    0.13    0.44
   3  -1  -6  163.61    3.65
  -3   1   6  160.16    3.57
   3  -1  -5  216.45    4.51
  -3   1   5  208.56    4.39
   3  -1  -4   22.19    0.77
  -3   1   4   20.99    0.77
   3  -1  -3   21.09    0.72
  -3   1   3   21.59    0.74
   3  -1  -2    0.95    0.26
  -3   1   2    0.86    0.26
   3  -1  -1   26.01    0.78
  -3   1   1   25.54    1.07
   3  -1   0  133.93    2.88
  -3   1   0  133.91    2.72
   3  -1   1   46.35    1.36
  -3   1  -1   42.25    1.11
   3  -1   2   42.77    1.10
  -3   1  -2   43.66    1.50
   3  -1   3    0.04    0.18
  -3   1  -3    0.21    0.21
   3  -1   4   91.16    2.09
  -3   1  -4   88.26    2.22
   3  -1   5  343.70    7.30
   3  -1   6  113.44    2.77
   3  -1   7    4.75    0.40
   3  -1   7    4.08    0.54
   3  -1   8    5.91    0.64
   3  -1   8    5.80    0.67
   3  -1   8    6.85    0.49
   3  -1   9   56.04    1.92
   3  -1   9   57.41    1.56
   3  -1   9   54.81    1.94
   3  -1  10    7.98    1.21
   3  -1  10    7.41    0.57
   3  -1  10    7.00    0.86
   3  -1  11    0.40    0.43
   3  -1  11    0.14    0.45
   3  -1  11    0.61    0.68
   3  -1  12   10.32    1.02
   3  -1  12   10.46    1.06
   3  -1  12   10.90    1.13
   3  -1  13    0.33    0.43
   3  -1  13   -0.17    0.46
   3  -1  13    0.35    0.49
   3  -1  14    4.78    0.93
   3  -1  14    6.15    1.04
   3  -1  14    6.29    1.07
   3  -1  15    5.73    1.14
   3  -1  15    4.84    1.03
   3  -1  15    6.78    1.79
   3  -1  16    0.34    0.40
   3  -1  16    0.33    1.07
   3  -1  16    0.48    0.68
   3  -1  17    9.52    2.55
   3  -1  17   13.08    1.58
   3  -1  18    2.21    1.11
   3  -1  18    0.72    1.59
   3   0 -16    0.00    0.39
   3   0 -16    0.00    0.58
   3   0 -15    0.04    0.66
   3   0 -15    0.39    0.69
  -3   0  15    0.36    0.53
   3   0 -14    0.61    0.68
   3   0 -14    0.07    1.05
  -3   0  14    0.54    0.55
   3   0 -13   15.26    1.46
   3   0 -13   15.47    1.46
  -3   0  13   14.03    1.75
   3   0 -12   10.71    1.19
   3   0 -12    8.95    1.19
  -3   0  12   10.72    1.41
   3   0 -11    1.58    0.95
   3   0 -11    1.13    0.94
  -3   0  11    0.94    0.79
   3   0 -10    0.60    0.54
   3   0 -10    0.94    0.54
  -3   0  10    1.46    0.70
   3   0  -9   10.14    0.91
   3   0  -9    8.99    0.87
  -3   0   9   10.53    1.14
   3   0  -8    4.16    0.64
   3   0  -8    4.44    0.61
  -3   0   8    4.23    0.53
   3   0  -7    3.16    0.55
   3   0  -7    2.74    0.48
  -3   0   7    3.00    0.44
   3   0  -6    3.44    0.45
   3   0  -6    3.43    0.53
  -3   0   6    2.83    0.64
   3   0  -5  261.90    5.34
  -3   0   5  252.84    5.18
   3   0  -4   35.30    1.26
  -3   0   4   34.22    1.00
   3   0  -3  114.84    2.31
  -3   0   3  110.15    2.31
   3   0  -2  171.80    3.30
  -3   0   2  166.88    3.33
   3   0  -1    5.69    0.39
  -3   0   1    5.43    0.42
   3   0   0    0.33    0.21
  -3   0   0    0.49    0.33
   3   0   1    2.13    0.32
  -3   0  -1    1.66    0.51
   3   0   2   15.39    0.65
  -3   0  -2   15.32    1.00
   3   0   3   56.85    1.79
  -3   0  -3   56.92    1.56
   3   0   4    4.48    0.47
  -3   0  -4    5.78    0.78
   3   0   5  137.34    3.17
   3   0   6   86.02    2.26
   3   0   7   51.66    1.68
   3   0   7   51.04    1.17
   3   0   8   38.78    1.92
   3   0   8   37.52    1.51
   3   0   8   37.91    0.98
   3   0   9    0.84    0.39
   3   0   9    0.97    0.46
   3   0   9    0.86    0.79
   3   0  10   49.32    1.30
   3   0  10   50.37    2.02
   3   0  10   49.13    1.94
   3   0  11    1.13    0.59
   3   0  11    0.73    0.55
   3   0  11    0.88    0.44
   3   0  12   21.09    1.10
   3   0  12   19.99    1.49
   3   0  12   20.50    1.47
   3   0  13    0.12    0.20
   3   0  13    0.05    0.47
   3   0  14    3.41    0.92
   3   0  14    2.76    1.42
   3   0  14    2.42    0.44
   3   0  15    0.34    0.53
   3   0  15   -0.51    0.52
   3   0  16    0.88    0.91
   3   0  16    1.47    0.90
   3   0  17    4.36    1.37
   3   0  17    4.93    1.93
   3   0  18   10.77    1.68
   3   0  18    7.41    1.77
   3   1 -16   -0.01    1.06
   3   1 -16    0.00    1.15
  -3  -1  16    6.61    1.24
   3   1 -15   -0.20    0.77
   3   1 -15    1.79    1.37
  -3  -1  15    1.33    0.62
   3   1 -14    0.65    0.74
   3   1 -14    0.55    0.65
  -3  -1  14    0.39    0.51
   3   1 -13    9.99    2.02
   3   1 -13    9.72    1.21
  -3  -1  13   10.61    0.99
   3   1 -12   39.09    2.11
   3   1 -12   38.34    1.92
  -3  -1  12   38.36    1.62
   3   1 -11    1.42    1.05
   3   1 -11    1.89    0.77
  -3  -1  11    2.49    0.54
   3   1 -10    1.70    0.68
   3   1 -10    1.13    0.57
  -3  -1  10    2.13    0.47
   3   1  -9    6.87    0.86
   3   1  -9    6.42    0.73
  -3  -1   9    6.48    0.62
   3   1  -8    0.82    0.61
   3   1  -8    0.23    0.33
  -3  -1   8    0.31    0.29
   3   1  -7    6.48    0.58
   3   1  -7    6.21    0.70
  -3  -1   7    6.99    0.54
   3   1  -6   30.49    1.00
   3   1  -6   30.16    1.20
  -3  -1   6   29.79    0.94
   3   1  -5  120.14    2.85
   3   1  -5  122.62    3.41
  -3  -1   5  117.93    2.53
   3   1  -4  233.63    5.07
   3   1  -4  229.98    4.52
  -3  -1   4  224.16    4.50
   3   1  -3  410.25    7.93
  -3  -1   3  404.98    8.06
   3   1  -2   42.07    1.03
  -3  -1   2   40.68    1.05
   3   1  -1  117.08    2.34
  -3  -1   1  114.38    2.40
   3   1   0   46.26    1.15
  -3  -1   0   44.70    1.18
   3   1   1   16.36    0.66
  -3  -1  -1   18.42    0.73
   3   1   2    3.25    0.39
  -3  -1  -2    3.10    0.44
   3   1   3   39.46    1.20
  -3  -1  -3   39.72    1.28
   3   1   4    0.50    0.28
  -3  -1  -4    0.23    0.29
   3   1   5   44.53    1.41
   3   1   6   41.48    1.46
   3   1   7  146.53    2.80
   3   1   7  145.20    3.67
   3   1   8    0.88    0.47
   3   1   8    0.45    0.46
   3   1   8    0.99    0.18
   3   1   9   20.39    0.58
   3   1   9   19.52    1.75
   3   1  10    3.71    1.27
   3   1  10    4.56    0.30
   3   1  11    6.90    0.98
   3   1  11    6.32    0.37
   3   1  12    0.73    0.63
   3   1  12    0.67    0.22
   3   1  13   18.78    0.70
   3   1  13   17.27    1.60
   3   1  14    1.37    1.35
   3   1  15    1.74    0.97
   3   1  16    7.29    1.42
   3   1  17    1.73    1.10
   3   1  18   13.17    2.08
   3   1  18   16.16    2.01
   3   2 -16    1.34    0.87
   3   2 -16    0.00    1.03
  -3  -2  16    1.29    0.65
   3   2 -15   -0.01    1.14
   3   2 -15    0.02    0.96
  -3  -2  15    4.15    0.72
   3   2 -14    0.06    0.75
   3   2 -14    0.53    0.58
  -3  -2  14    0.47    0.45
   3   2 -13   -0.18    0.45
   3   2 -13   -0.20    0.35
  -3  -2  13    0.13    0.27
   3   2 -12   29.57    2.80
  -3  -2  12   25.58    1.25
   3   2 -11    3.94    0.98
   3   2 -11    4.52    0.78
  -3  -2  11    4.63    0.60
   3   2 -10    0.16    0.66
   3   2 -10   -0.06    0.32
  -3  -2  10    0.22    0.26
   3   2  -9   -0.01    0.46
   3   2  -9    0.32    0.33
  -3  -2   9    0.31    0.28
   3   2  -8    0.83    0.82
   3   2  -8    0.96    0.37
  -3  -2   8    0.90    0.32
   3   2  -7    5.11    0.51
   3   2  -7    6.32    0.74
  -3  -2   7    5.97    0.72
   3   2  -6    3.90    0.60
   3   2  -6    4.28    0.88
  -3  -2   6    3.12    0.38
   3   2  -5   48.42    1.55
   3   2  -5   47.00    1.18
  -3  -2   5   47.40    1.21
   3   2  -4  508.66   11.13
   3   2  -4  512.74   10.48
  -3  -2   4  518.76   10.51
   3   2  -3  169.92    3.23
   3   2  -3  167.24    3.68
  -3  -2   3  169.71    3.37
   3   2  -2   41.76    1.20
   3   2  -2   38.39    1.13
  -3  -2   2   41.21    1.31
   3   2  -1   25.40    0.83
   3   2  -1   30.65    0.82
  -3  -2   1   28.28    0.83
   3   2   0   33.78    0.94
  -3  -2   0   32.21    0.97
   3   2   1    1.64    0.31
  -3  -2  -1    1.46    0.34
   3   2   2    6.85    0.51
  -3  -2  -2    7.05    0.55
   3   2   3  120.69    2.77
  -3  -2  -3  114.76    2.78
   3   2   4   26.76    1.06
   3   2   5    6.15    0.62
   3   2   6   12.58    0.86
   3   2   7   40.67    0.76
   3   2   7   40.08    1.59
   3   2   7   42.56    1.58
   3   2   8   32.35    1.51
   3   2   8   34.20    0.69
   3   2   9    9.81    0.27
   3   2   9    8.69    0.99
   3   2  10    0.38    0.17
   3   2  10    0.27    0.50
   3   2  11   50.65    3.10
   3   2  12    1.97    0.84
   3   2  13    0.07    0.49
   3   2  14    5.71    2.01
   3   2  15   10.02    1.59
   3   2  16    7.16    1.51
   3   2  17   -0.45    0.88
   3   2  18    3.88    1.42
   3   3 -16    1.48    0.68
   3   3 -16   -0.01    0.85
  -3  -3  16   -0.24    0.50
   3   3 -15   -0.01    0.81
   3   3 -15    0.01    1.08
  -3  -3  15    3.61    0.93
   3   3 -14    0.01    0.66
   3   3 -14    0.00    0.91
  -3  -3  14    2.66    0.78
   3   3 -13    0.99    0.95
   3   3 -13    1.67    1.06
  -3  -3  13    2.06    0.79
   3   3 -12    3.22    1.14
   3   3 -12    3.74    0.76
  -3  -3  12    4.14    0.89
   3   3 -11   14.51    1.46
   3   3 -11   13.51    1.00
  -3  -3  11   12.56    1.19
   3   3 -10    0.37    0.76
   3   3 -10    0.05    0.32
  -3  -3  10    0.33    0.42
   3   3  -9    3.04    0.85
   3   3  -9    4.12    0.54
  -3  -3   9    3.74    0.48
   3   3  -8   10.36    1.50
   3   3  -8    9.15    0.63
  -3  -3   8    9.36    0.59
   3   3  -7    1.03    0.29
   3   3  -7    0.51    0.50
  -3  -3   7    0.84    0.28
   3   3  -6   15.25    0.84
   3   3  -6   17.30    1.06
  -3  -3   6   16.61    0.63
   3   3  -5   29.56    0.84
   3   3  -5   29.69    1.26
  -3  -3   5   30.13    0.86
   3   3  -4   37.05    0.92
   3   3  -4   39.70    1.35
  -3  -3   4   38.82    1.00
   3   3  -3  140.64    2.67
   3   3  -3  135.50    3.60
  -3  -3   3  145.67    3.20
   3   3  -2    5.08    0.33
   3   3  -2    4.53    0.47
  -3  -3   2    4.36    0.36
   3   3  -1    4.87    0.44
   3   3  -1    5.13    0.53
  -3  -3   1    5.39    0.40
   3   3   0   27.19    0.81
   3   3   0   26.58    0.79
  -3  -3   0   27.32    0.90
   3   3   1   68.46    1.43
   3   3   1   70.37    1.68
  -3  -3  -1   68.96    2.09
   3   3   2   43.10    1.08
   3   3   2   43.91    1.29
  -3  -3  -2   42.43    1.32
   3   3   3    6.79    0.58
   3   3   3    6.99    0.38
   3   3   4   35.86    1.64
   3   3   4   34.53    0.60
   3   3   5   19.54    1.40
   3   3   5   19.42    0.37
   3   3   6  104.32    1.32
   3   3   6  102.84    1.27
   3   3   6  104.36    2.86
   3   3   7   19.46    1.64
   3   3   8  194.11    5.19
   3   3   9    4.98    0.87
   3   3  10   27.66    1.66
   3   3  11   27.77    2.51
   3   3  12   27.72    1.92
   3   3  13    4.78    1.17
   3   3  14   -0.53    1.26
   3   3  15    7.85    1.55
   3   3  16    0.57    0.87
   3   3  17   -0.94    1.06
   3   3  18   -0.98    1.10
   3   4 -15   -0.01    1.21
   3   4 -15    0.00    1.10
  -3  -4  15    2.22    0.85
   3   4 -14    0.00    0.75
   3   4 -14    0.00    1.09
  -3  -4  14    3.71    0.82
   3   4 -13   -0.07    0.97
   3   4 -13   -0.01    0.40
  -3  -4  13    0.23    0.30
   3   4 -12   -0.30    0.38
   3   4 -12   -0.36    0.62
  -3  -4  12   -0.08    0.30
   3   4 -11    8.42    1.29
   3   4 -11    6.25    1.20
  -3  -4  11    8.36    0.95
   3   4 -10   21.89    1.69
   3   4 -10   19.81    1.44
  -3  -4  10   21.03    1.24
   3   4  -9   10.01    1.01
   3   4  -9   11.71    1.25
  -3  -4   9   10.80    0.64
   3   4  -8    6.90    1.47
   3   4  -8    5.64    0.49
  -3  -4   8    5.59    0.46
   3   4  -7    2.44    0.33
   3   4  -7    1.47    0.68
  -3  -4   7    2.27    0.33
   3   4  -6   13.38    0.79
   3   4  -6   14.44    1.06
  -3  -4   6   15.08    0.60
   3   4  -5   -0.10    0.58
   3   4  -5    0.26    0.17
  -3  -4   5    0.39    0.19
   3   4  -4   22.92    0.64
   3   4  -4   23.36    1.11
  -3  -4   4   22.28    1.00
  -3  -4   4   23.07    0.73
   3   4  -3   72.44    1.65
   3   4  -3   73.64    2.06
  -3  -4   3   75.49    1.89
  -3  -4   3   77.82    1.96
   3   4  -2    0.66    0.18
   3   4  -2    0.28    0.32
  -3  -4   2    0.41    0.22
  -3  -4   2    0.69    0.29
   3   4  -1   25.30    1.25
   3   4  -1   25.18    0.73
  -3  -4   1   24.42    0.82
  -3  -4   1   23.54    0.83
   3   4   0   49.39    1.56
   3   4   0   53.79    1.32
  -3  -4   0   50.37    1.67
   3   4   1   18.50    0.73
   3   4   1   16.97    0.84
  -3  -4  -1   18.11    0.80
   3   4   2    4.74    0.32
   3   4   2    4.73    0.72
   3   4   3   11.94    0.73
   3   4   3   12.67    0.40
   3   4   4   49.95    1.60
   3   4   4   48.66    0.87
   3   4   5    0.16    0.27
   3   4   5    0.07    0.07
   3   4   6   14.94    1.00
   3   4   7   14.60    1.10
   3   4   8   80.08    2.74
   3   4   9    8.76    1.61
   3   4  10   10.36    1.20
   3   4  11    8.27    1.21
   3   4  12   30.10    2.10
   3   4  13    5.80    1.31
   3   4  14    1.35    1.53
   3   4  15    1.92    1.15
   3   4  16    0.07    0.63
   3   4  17    0.15    0.78
   3   4  18    4.12    1.59
   3   5 -15    0.00    0.48
   3   5 -15    0.01    0.74
  -3  -5  15    0.28    0.54
   3   5 -14   -0.01    2.02
   3   5 -14   -0.01    1.29
  -3  -5  14    4.10    0.89
   3   5 -13    1.21    0.81
   3   5 -13    0.01    0.50
  -3  -5  13    0.41    0.54
   3   5 -12   -0.01    0.48
   3   5 -12    1.63    0.83
  -3  -5  12    0.95    0.54
   3   5 -11    0.49    0.51
   3   5 -11    0.00    0.27
  -3  -5  11   -0.36    0.33
   3   5 -10   26.44    1.17
   3   5 -10   25.85    1.99
  -3  -5  10   26.67    1.01
   3   5  -9   18.91    0.87
   3   5  -9   20.23    1.64
  -3  -5   9   18.82    0.77
   3   5  -8    7.53    1.19
   3   5  -8    9.49    0.57
  -3  -5   8    9.07    0.55
   3   5  -7    2.80    0.32
   3   5  -7    3.12    0.79
  -3  -5   7    2.39    0.52
  -3  -5   7    2.18    0.66
   3   5  -6   25.72    1.46
   3   5  -6   22.74    0.70
  -3  -5   6   25.12    1.25
  -3  -5   6   25.07    1.00
   3   5  -5    2.84    0.28
   3   5  -5    3.77    0.70
  -3  -5   5    3.87    0.50
  -3  -5   5    3.90    0.59
   3   5  -4    5.60    1.05
   3   5  -4    4.25    0.44
  -3  -5   4    5.40    0.38
  -3  -5   4    4.74    0.60
   3   5  -3  166.07    4.13
   3   5  -3  171.04    3.18
  -3  -5   3  170.99    4.41
  -3  -5   3  174.41    3.83
   3   5  -2   28.12    1.14
   3   5  -2   28.48    0.92
  -3  -5   2   28.23    0.88
  -3  -5   2   27.81    1.03
   3   5  -1    0.94    0.37
   3   5  -1    1.26    0.23
  -3  -5   1    1.12    0.33
  -3  -5   1    0.78    0.43
   3   5   0   69.65    1.76
   3   5   0   70.36    1.64
  -3  -5   0   72.66    1.99
  -3  -5   0   70.30    1.80
   3   5   1   34.10    1.27
   3   5   1   32.82    1.04
  -3  -5  -1   33.52    1.16
   3   5   2   46.47    1.14
   3   5   2   44.22    1.38
  -3  -5  -2   45.36    1.04
   3   5   3   -0.01    0.20
   3   5   3    0.05    0.11
   3   5   4   20.88    0.51
   3   5   4   21.24    1.42
   3   5   5   92.00    1.52
   3   5   5   87.30    2.59
   3   5   5   90.42    2.61
   3   5   6   14.67    1.00
   3   5   7    9.87    1.45
   3   5   8   31.32    1.67
   3   5   9   16.98    1.33
   3   5  10    1.48    1.22
   3   5  11    6.79    1.22
   3   5  12   17.35    1.75
   3   5  13   11.01    1.63
   3   5  14    3.16    1.26
   3   5  15    0.03    0.57
   3   5  16   -0.07    0.70
   3   5  17    0.15    0.83
   3   5  18    0.11    0.82
   3   6 -14    2.92    1.41
   3   6 -13    7.68    1.55
   3   6 -13    0.00    1.31
  -3  -6  13    6.41    0.67
   3   6 -12    0.00    0.29
   3   6 -12    0.30    0.56
  -3  -6  12    0.03    0.22
   3   6 -11    0.00    0.49
   3   6 -11    2.67    1.03
  -3  -6  11    2.43    0.39
   3   6 -10    5.37    0.60
   3   6 -10    5.28    1.27
  -3  -6  10    5.61    0.73
   3   6  -9   11.44    2.20
   3   6  -9   11.30    1.01
  -3  -6   9   12.26    0.64
  -3  -6   9   12.81    1.28
   3   6  -8   10.42    0.82
   3   6  -8   11.74    1.38
  -3  -6   8   11.84    0.85
  -3  -6   8   12.59    1.18
   3   6  -7    4.59    0.36
   3   6  -7    4.21    0.99
  -3  -6   7    4.62    0.57
  -3  -6   7    4.41    0.82
   3   6  -6   52.79    1.17
   3   6  -6   55.37    2.33
  -3  -6   6   51.91    2.60
  -3  -6   6   56.87    1.68
   3   6  -5    0.13    0.11
   3   6  -5   -0.45    0.37
  -3  -6   5    0.10    0.15
  -3  -6   5   -0.12    0.31
   3   6  -4    6.09    0.46
   3   6  -4    6.61    0.86
  -3  -6   4    6.74    0.41
  -3  -6   4    7.29    0.72
   3   6  -3   24.08    1.70
   3   6  -3   23.06    0.60
  -3  -6   3   22.83    1.00
  -3  -6   3   22.79    1.07
   3   6  -2  221.23    5.96
   3   6  -2  229.60    4.39
  -3  -6   2  229.06    4.79
  -3  -6   2  218.65    5.00
   3   6  -1    0.32    0.30
   3   6  -1    0.08    0.26
  -3  -6   1    0.30    0.32
  -3  -6   1    0.36    0.42
   3   6   0    0.63    0.33
   3   6   0    0.61    0.24
  -3  -6   0    0.65    0.45
   3   6   1   42.43    1.23
   3   6   1   41.12    1.25
  -3  -6  -1   40.26    1.42
   3   6   2  153.65    3.59
   3   6   2  157.60    3.33
  -3  -6  -2  146.58    3.01
   3   6   3    7.70    0.67
   3   6   3    7.62    0.42
  -3  -6  -3    7.22    0.38
   3   6   4   14.15    0.91
   3   6   4   13.92    0.89
   3   6   4   13.77    0.48
  -3  -6  -4   14.30    0.43
   3   6   5   86.64    2.59
   3   6   5   85.31    2.54
   3   6   6    5.79    0.80
   3   6   7   32.17    1.64
   3   6   8    0.78    0.59
   3   6   9   23.25    1.63
   3   6  10   22.99    1.76
   3   6  11   10.42    1.48
   3   6  12    0.13    0.61
   3   6  13   18.70    2.08
   3   6  14   -0.16    0.72
   3   6  15    0.06    0.67
   3   6  16    0.14    0.79
   3   6  17   -0.03    0.68
   3   7 -14    0.84    1.76
   3   7 -13    8.78    1.85
   3   7 -12    4.18    1.06
   3   7 -12    0.00    0.47
  -3  -7  12    1.20    0.39
   3   7 -11   -0.26    0.81
   3   7 -11    0.01    0.33
  -3  -7  11    0.74    0.29
   3   7 -10    2.19    0.41
   3   7 -10    2.31    1.60
  -3  -7  10    0.31    0.55
  -3  -7  10    3.52    0.88
   3   7  -9    6.85    0.75
   3   7  -9    6.33    1.35
  -3  -7   9    6.60    0.47
  -3  -7   9    7.10    1.15
   3   7  -8   11.05    1.46
   3   7  -8   10.81    0.73
  -3  -7   8   11.16    1.22
  -3  -7   8   10.08    0.55
   3   7  -7   23.31    1.79
   3   7  -7   23.44    0.92
  -3  -7   7   24.05    0.80
  -3  -7   7   23.49    1.50
   3   7  -6    7.85    0.49
   3   7  -6    7.91    1.14
  -3  -7   6    8.90    0.93
  -3  -7   6    6.92    0.43
   3   7  -5   12.40    0.54
   3   7  -5   11.92    1.24
  -3  -7   5   14.11    1.03
  -3  -7   5   12.46    0.73
   3   7  -4    2.49    0.33
   3   7  -4    2.87    0.72
  -3  -7   4    2.30    0.97
  -3  -7   4    2.80    0.31
   3   7  -3    0.09    0.11
   3   7  -3    0.05    0.35
  -3  -7   3    0.05    0.15
  -3  -7   3    0.22    0.30
   3   7  -2   61.86    2.06
   3   7  -2   58.65    1.28
  -3  -7   2   58.71    1.85
   3   7  -1   71.98    2.18
   3   7  -1   70.35    1.61
  -3  -7   1   69.98    2.01
   3   7   0    0.89    0.40
   3   7   0    1.08    0.27
  -3  -7   0    0.54    0.35
   3   7   1    8.22    0.63
   3   7   1    6.20    0.56
  -3  -7  -1    8.13    0.56
   3   7   2   40.90    1.25
   3   7   2   40.77    1.75
  -3  -7  -2   40.60    1.13
   3   7   3   48.14    1.62
   3   7   3   50.82    1.68
   3   7   3   49.81    1.32
  -3  -7  -3   50.77    1.24
   3   7   4    0.25    0.40
   3   7   4    0.68    0.41
  -3  -7  -4    0.63    0.19
   3   7   5   10.19    0.90
  -3  -7  -5   10.09    0.36
   3   7   6   49.35    1.98
  -3  -7  -6   49.97    0.91
   3   7   7    1.68    1.01
   3   7   8    7.50    1.08
   3   7   9    5.29    1.04
   3   7  10   22.41    1.80
   3   7  11    0.27    0.67
   3   7  12    3.71    1.25
   3   7  13    9.61    1.65
   3   7  14    0.01    0.50
   3   7  15    0.07    1.05
   3   7  16   -0.01    0.58
   3   8 -13    3.06    1.50
   3   8 -12   11.02    1.95
   3   8 -11    2.08    1.22
  -3  -8  11    1.89    1.05
   3   8 -10   -0.61    0.59
   3   8 -10    0.29    0.25
  -3  -8  10   -0.18    0.49
  -3  -8  10    0.00    0.23
   3   8  -9   17.78    1.94
   3   8  -9   16.80    0.84
  -3  -8   9   19.02    1.63
  -3  -8   9   16.30    0.63
   3   8  -8   -0.21    0.43
   3   8  -8    0.06    0.10
  -3  -8   8    0.00    0.11
  -3  -8   8   -0.29    0.35
   3   8  -7   22.52    0.61
   3   8  -7   21.94    1.87
  -3  -8   7   21.53    0.68
  -3  -8   7   22.51    1.56
   3   8  -6   -0.91    0.54
   3   8  -6    0.04    0.07
  -3  -8   6   -0.20    0.28
  -3  -8   6    0.00    0.14
   3   8  -5   15.59    0.41
   3   8  -5   17.09    2.12
  -3  -8   5   15.13    1.21
  -3  -8   5   16.13    0.79
   3   8  -4   -0.01    0.07
   3   8  -4    0.24    0.44
  -3  -8   4    0.17    0.23
   3   8  -3   24.90    0.63
   3   8  -3   27.46    1.53
  -3  -8   3   25.18    1.30
   3   8  -2    6.95    0.88
   3   8  -2    6.52    0.35
  -3  -8   2    6.33    0.75
   3   8  -1    6.81    0.80
   3   8  -1    5.65    0.40
  -3  -8   1    7.32    1.02
   3   8   0    3.67    0.40
   3   8   0    3.87    0.65
  -3  -8   0    4.16    0.56
   3   8   1    9.86    0.66
   3   8   1   11.07    0.71
   3   8   1   10.55    0.78
  -3  -8  -1   11.68    0.71
   3   8   2    7.90    0.68
   3   8   2    7.68    1.00
   3   8   2    8.65    0.96
  -3  -8  -2    8.60    0.58
   3   8   3   95.47    2.74
   3   8   3   94.73    2.74
  -3  -8  -3   97.81    2.25
   3   8   4    0.13    0.36
   3   8   4   -0.15    0.36
  -3  -8  -4    0.34    0.19
   3   8   5    3.24    0.67
  -3  -8  -5    2.62    0.28
   3   8   6   38.28    1.78
  -3  -8  -6   39.24    1.02
   3   8   7    9.55    1.09
  -3  -8  -7    9.95    0.29
   3   8   8    3.58    0.93
   3   8   9    0.45    0.66
   3   8  10   35.32    3.17
   3   8  11   17.79    1.87
   3   8  12    0.47    1.33
   3   8  13    1.97    1.17
   3   8  14    0.05    0.69
   3   8  15   -0.16    0.85
   3   8  16    0.16    0.88
   3   9 -12   10.48    1.85
  -3  -9  12    2.85    1.60
   3   9 -11    0.95    1.15
  -3  -9  11    1.28    1.02
   3   9 -10    8.34    1.66
  -3  -9  10    6.94    1.46
   3   9  -9    2.46    1.21
  -3  -9   9    2.67    1.60
   3   9  -8    5.32    2.20
  -3  -9   8    6.85    1.19
   3   9  -7    2.41    0.18
   3   9  -7    3.15    1.62
  -3  -9   7    3.33    0.89
   3   9  -6   -0.29    0.49
   3   9  -6    0.06    0.06
  -3  -9   6    0.81    0.62
   3   9  -5    7.87    0.31
   3   9  -5    8.84    1.28
  -3  -9   5    8.73    1.04
   3   9  -4   22.31    0.60
   3   9  -4   23.14    1.66
  -3  -9   4   21.78    1.39
   3   9  -3    3.38    0.23
   3   9  -3    4.33    1.33
  -3  -9   3    3.05    1.12
   3   9  -2    1.21    0.27
   3   9  -2    1.37    0.22
   3   9  -2    1.65    0.66
  -3  -9   2    1.72    0.56
   3   9  -1   33.56    1.36
   3   9  -1   35.91    1.67
   3   9  -1   34.03    1.01
  -3  -9   1   35.21    1.47
   3   9   0    3.06    0.43
   3   9   0    2.68    0.40
   3   9   0    3.81    0.67
  -3  -9   0    3.38    0.58
   3   9   1    6.74    0.78
   3   9   1    5.83    0.58
   3   9   1    6.80    0.60
  -3  -9  -1    5.96    0.67
   3   9   2    3.95    0.57
   3   9   2    3.41    0.57
  -3  -9  -2    4.01    0.52
   3   9   3   86.89    2.66
   3   9   3   87.26    2.63
  -3  -9  -3   88.84    2.22
   3   9   4    6.63    0.81
   3   9   4    6.10    1.17
  -3  -9  -4    6.57    0.50
   3   9   5   10.84    1.00
   3   9   5    9.73    1.01
  -3  -9  -5   10.30    0.53
   3   9   6   22.61    1.50
  -3  -9  -6   25.32    0.94
   3   9   7   -0.09    0.50
  -3  -9  -7    0.27    0.21
   3   9   8   16.33    1.54
  -3  -9  -8   15.51    0.37
   3   9   9    1.87    1.40
   3   9  10    3.36    1.16
   3   9  11   13.41    1.82
   3   9  12    7.33    1.54
   3   9  13    7.35    1.66
   3   9  14    6.84    2.67
   3   9  15    0.11    0.83
   3   9  16    0.03    0.72
   3  10 -12    4.21    1.94
  -3 -10  12    5.98    1.67
   3  10 -11    2.46    2.55
  -3 -10  11    4.14    1.40
   3  10 -10    0.69    1.45
  -3 -10  10    0.27    0.80
   3  10  -9    5.27    1.50
  -3 -10   9    5.07    1.29
   3  10  -8   -0.17    0.96
  -3 -10   8    1.32    0.78
   3  10  -7   13.06    1.78
  -3 -10   7   13.61    2.20
   3  10  -6    0.67    0.87
  -3 -10   6    1.12    0.72
   3  10  -5    0.11    0.30
  -3 -10   5   -0.08    0.25
   3  10  -4   26.58    0.45
   3  10  -4   24.26    1.90
  -3 -10   4   24.25    1.57
   3  10  -3    5.78    0.35
   3  10  -3    4.94    0.47
   3  10  -3    5.40    1.07
  -3 -10   3    4.77    0.91
   3  10  -2   15.25    2.09
   3  10  -2   14.80    0.50
   3  10  -2   13.13    0.59
  -3 -10   2   15.53    1.14
   3  10  -1    8.34    1.09
   3  10  -1    8.08    0.50
   3  10  -1    7.94    0.55
  -3 -10   1    8.35    0.90
   3  10   0   47.82    2.05
   3  10   0   46.91    1.42
   3  10   0   45.16    1.81
  -3 -10   0   44.49    1.76
   3  10   1    4.32    0.54
   3  10   1    3.41    0.82
  -3 -10  -1    5.75    1.00
   3  10   2    1.51    0.75
   3  10   2    1.70    0.47
  -3 -10  -2    2.06    0.76
   3  10   3   22.01    1.23
   3  10   3   20.26    1.18
  -3 -10  -3   21.65    1.41
   3  10   4   17.16    1.68
   3  10   4   14.81    1.64
  -3 -10  -4   15.86    1.18
   3  10   5   95.09    3.22
   3  10   5   89.40    3.04
  -3 -10  -5   90.75    2.60
   3  10   6    3.29    0.88
  -3 -10  -6    3.76    0.39
   3  10   7   13.36    2.02
  -3 -10  -7   13.33    0.74
   3  10   8   12.36    1.42
  -3 -10  -8   11.36    0.56
   3  10   9    6.74    1.32
   3  10  10    0.54    1.24
   3  10  11   10.45    1.64
   3  10  12   12.51    1.93
   3  10  13    1.94    1.90
   3  10  14    0.46    1.00
   3  10  15    9.42    2.13
   3  10  16    1.11    1.33
   3  11 -11    9.28    2.25
  -3 -11  11    8.92    1.89
   3  11 -10    0.40    0.92
  -3 -11  10   -0.19    1.18
   3  11  -9    1.24    1.42
  -3 -11   9    2.54    1.16
   3  11  -8    0.05    0.96
  -3 -11   8    0.63    0.76
   3  11  -7   -0.22    1.48
  -3 -11   7    9.82    1.78
   3  11  -6    3.15    1.36
  -3 -11   6    4.37    1.04
   3  11  -5    3.17    1.28
  -3 -11   5    4.04    0.97
   3  11  -4   23.15    1.97
  -3 -11   4   21.74    2.31
   3  11  -3    7.56    0.41
   3  11  -3    9.43    0.34
   3  11  -3   10.10    1.41
  -3 -11   3    8.70    1.09
   3  11  -2    7.54    1.26
   3  11  -2    7.87    0.50
   3  11  -2    7.55    0.60
  -3 -11   2    7.59    1.02
   3  11  -1    1.20    0.31
   3  11  -1    1.21    0.44
  -3 -11   1    1.37    0.62
   3  11   0   31.26    1.17
   3  11   0   33.82    1.20
  -3 -11   0   32.88    2.18
   3  11   1    3.02    0.54
   3  11   1    3.50    0.52
  -3 -11  -1    5.12    1.08
   3  11   2    1.40    0.50
   3  11   2    1.59    0.51
  -3 -11  -2    1.81    0.55
   3  11   3    1.52    0.56
   3  11   3    0.98    0.85
  -3 -11  -3    1.81    0.50
   3  11   4    0.37    0.47
   3  11   4    0.29    0.45
  -3 -11  -4    0.33    0.34
   3  11   5   85.80    3.85
   3  11   5   96.28    3.35
  -3 -11  -5   87.12    2.84
   3  11   6    1.30    0.74
  -3 -11  -6    1.71    0.56
   3  11   7    5.36    1.04
  -3 -11  -7    3.95    0.41
   3  11   8   51.82    2.66
  -3 -11  -8   48.43    1.21
   3  11   9    3.51    1.09
  -3 -11  -9    3.63    0.25
   3  11  10   -0.10    0.60
   3  11  11   16.43    1.97
   3  11  12   19.99    3.18
   3  11  13   -0.37    0.91
   3  11  14   -0.04    0.67
  -3 -12  10    4.51    1.57
  -3 -12   9    0.97    1.03
  -3 -12   8    0.48    0.85
  -3 -12   7    3.07    1.17
  -3 -12   6    3.45    1.10
  -3 -12   5    0.25    0.59
  -3 -12   4    1.81    1.33
  -3 -12   3    6.72    1.09
   3  12  -2    2.89    0.22
   3  12  -2    2.55    0.25
  -3 -12   2    1.97    0.86
   3  12  -1    2.39    0.33
   3  12  -1    1.68    0.34
  -3 -12   1    2.29    0.75
   3  12   0   15.78    1.17
   3  12   0   16.04    1.17
  -3 -12   0   14.81    1.82
   3  12   1    1.94    0.72
   3  12   1    0.95    0.45
  -3 -12  -1    1.92    0.64
   3  12   2    0.20    0.37
   3  12   2    0.37    0.38
  -3 -12  -2    0.32    0.43
   3  12   3    1.54    0.61
   3  12   3    1.57    0.59
  -3 -12  -3    2.00    0.56
   3  12   4    0.19    0.46
   3  12   4    0.39    0.43
  -3 -12  -4    0.06    0.33
   3  12   5   66.47    2.69
   3  12   5   66.00    2.77
  -3 -12  -5   60.29    1.99
   3  12   6    0.19    0.55
   3  12   6    0.84    0.77
  -3 -12  -6    0.03    0.45
   3  12   7    2.63    0.83
  -3 -12  -7    1.57    0.37
   3  12   8   23.85    1.89
  -3 -12  -8   23.47    1.17
   3  12   9    3.08    1.07
  -3 -12  -9    2.40    0.45
   3  12  10    4.94    2.12
   3  12  11   -0.30    0.77
   3  12  12    7.53    1.73
   3  12  13    0.45    0.98
  -3 -13   8    0.47    0.91
  -3 -13   7    3.66    1.30
  -3 -13   6    5.68    1.35
  -3 -13   5    0.68    0.80
  -3 -13   4    0.12    0.85
  -3 -13   3    0.49    0.66
   3  13  -2   10.21    0.30
   3  13  -2   13.01    0.43
  -3 -13   2   11.18    1.34
   3  13  -1    0.62    0.22
   3  13  -1    0.43    0.35
  -3 -13   1    0.18    0.62
   3  13   0    0.88    0.35
   3  13   0    0.72    0.32
  -3 -13   0    0.99    1.02
   3  13   1   17.94    1.33
   3  13   1   19.13    1.06
  -3 -13  -1   19.23    2.10
   3  13   2   -0.02    0.23
   3  13   2   -0.10    0.38
  -3 -13  -2    0.05    0.30
   3  13   3    0.01    0.27
   3  13   3    0.11    0.26
  -3 -13  -3   -0.09    0.27
   3  13   4    0.14    0.56
   3  13   4    0.80    0.51
  -3 -13  -4    0.31    0.46
   3  13   5   24.94    2.48
   3  13   5   22.81    1.60
  -3 -13  -5   22.93    1.29
   3  13   6   17.78    1.65
   3  13   6   18.05    1.53
  -3 -13  -6   17.85    1.49
   3  13   7    0.38    0.43
  -3 -13  -7   -0.05    0.22
   3  13   8    1.24    1.20
  -3 -13  -8    0.77    0.33
   3  13   9    9.86    1.43
  -3 -13  -9    7.20    0.52
   3  13  10    1.26    0.99
   3  13  11    2.17    1.25
   3  13  13    5.98    1.73
  -3 -14   7   -0.03    0.60
  -3 -14   6    5.19    1.44
  -3 -14   5    1.01    0.93
  -3 -14   4   -0.39    1.13
  -3 -14   3   -0.36    0.67
  -3 -14   2    7.95    1.30
  -3 -14   1   -0.02    0.39
   3  14   0    1.77    0.52
   3  14   0    2.45    0.67
  -3 -14   0   -0.07    0.80
   3  14   1   14.59    1.40
   3  14   1   12.97    0.82
  -3 -14  -1   14.96    2.09
   3  14   2   21.83    1.34
   3  14   2   22.34    1.70
  -3 -14  -2   22.61    1.61
   3  14   3    0.19    0.40
   3  14   3    0.14    0.45
  -3 -14  -3    0.30    0.48
   3  14   4    1.04    0.66
   3  14   4    0.91    0.58
  -3 -14  -4    0.83    0.59
   3  14   5    0.50    0.75
   3  14   5    0.97    0.66
  -3 -14  -5    1.09    0.55
   3  14   6   14.83    1.47
   3  14   6   18.61    2.46
  -3 -14  -6   15.35    1.59
   3  14   7    1.53    1.00
   3  14   7    1.92    0.88
  -3 -14  -7    1.57    0.51
   3  14   8   -0.06    0.59
  -3 -14  -8   -0.13    0.28
   3  14   9    1.50    1.01
   3  14  10   -0.31    1.26
   3  14  11    2.46    1.25
   3  14  12    2.27    1.35
  -3 -15   5    4.27    1.41
  -3 -15   4    1.73    1.66
  -3 -15   3    0.15    0.63
  -3 -15   2   -0.05    0.51
  -3 -15   1    0.05    0.50
  -3 -15   0    0.00    0.34
   3  15   1   -0.05    0.25
   3  15   1   -0.31    0.32
  -3 -15  -1    0.02    0.51
   3  15   2    4.08    0.94
   3  15   2    4.79    1.19
  -3 -15  -2    0.04    1.47
   3  15   3    0.30    0.49
   3  15   3    1.01    0.59
  -3 -15  -3    0.73    0.98
   3  15   4    2.73    0.80
   3  15   4    3.90    0.96
  -3 -15  -4    3.91    1.35
   3  15   5    0.41    0.81
   3  15   5   -0.16    0.43
  -3 -15  -5   -0.23    0.62
   3  15   6    8.33    1.20
   3  15   6    6.21    1.43
  -3 -15  -6    8.04    1.41
   3  15   7    2.94    1.08
   3  15   7    1.82    0.90
  -3 -15  -7    1.56    0.61
   3  15   8    0.85    0.77
   3  15   8   -0.38    0.93
  -3 -15  -8    0.77    0.44
   3  15   9    1.12    0.95
   3  15  10    0.73    0.94
  -3 -16   2    0.01    0.44
  -3 -16   1    0.00    0.36
  -3 -16   0    0.10    0.59
  -3 -16  -1    0.05    0.49
  -3 -16  -2    0.04    0.45
   3  16   3    4.39    0.91
   3  16   3    4.41    1.09
  -3 -16  -3    0.05    1.01
   3  16   4    0.15    0.36
   3  16   4    0.03    0.46
  -3 -16  -4   -0.02    0.43
   3  16   5    2.19    0.79
   3  16   5    1.65    1.00
  -3 -16  -5    2.92    0.83
   3  16   6    0.09    0.89
   3  16   6    0.17    0.75
  -3 -16  -6    0.45    0.50
   3  16   7    5.72    1.38
   3  16   7    3.48    1.62
  -3 -16  -7    3.21    0.83
   3  16   8   -1.18    0.89
   3  16   8    0.56    0.72
   4 -15  -5    0.00    0.44
  -4  15   5   -0.05    0.59
   4 -15  -4    0.00    0.37
  -4  15   4    0.01    0.31
   4 -15  -3    0.02    0.97
  -4  15   3    4.71    0.83
   4 -15  -2   -0.30    0.49
  -4  15   2    0.10    0.65
   4 -15  -1    0.84    1.00
   4 -15  -1    0.20    0.54
  -4  15   1    0.47    0.75
   4 -15   0    1.74    1.34
  -4  15   0    1.47    0.65
   4 -15   1   12.66    3.50
   4 -15   2    0.39    1.04
   4 -15   3   -0.39    1.06
   4 -14  -8    0.02    1.09
  -4  14   8    0.35    0.71
   4 -14  -7    0.00    0.46
  -4  14   7   -0.06    0.47
   4 -14  -6    9.37    1.27
  -4  14   6    0.40    1.93
   4 -14  -5   -0.01    0.44
  -4  14   5   -0.11    0.43
   4 -14  -4    0.16    0.66
  -4  14   4    1.22    0.90
   4 -14  -3    4.53    1.02
  -4  14   3    4.94    0.86
   4 -14  -2    3.37    0.90
  -4  14   2    3.91    0.78
   4 -14  -1    7.17    1.01
  -4  14   1    7.96    0.92
   4 -14   0    0.56    0.47
  -4  14   0    0.23    0.45
   4 -14   1    6.28    1.56
   4 -14   1    2.97    0.70
  -4  14  -1    3.54    1.10
   4 -14   2    6.51    1.81
   4 -14   3   -0.30    0.94
   4 -14   4    1.18    1.26
   4 -14   5    1.32    1.32
   4 -14   6    3.39    1.71
   4 -13 -10   -0.02    0.70
  -4  13  10    0.00    0.46
   4 -13  -9   -0.10    0.57
  -4  13   9    0.08    0.89
   4 -13  -8    0.08    0.63
  -4  13   8    0.28    0.64
   4 -13  -7   -0.04    0.49
  -4  13   7    0.17    0.49
  -4  13   6    8.84    1.25
   4 -13  -5    1.91    0.84
  -4  13   5    2.98    0.83
   4 -13  -4    1.86    0.81
  -4  13   4    3.33    0.77
   4 -13  -3    2.29    0.79
  -4  13   3    2.14    0.69
   4 -13  -2   10.66    1.19
  -4  13   2   13.22    1.51
   4 -13  -1   -0.27    0.42
  -4  13   1   -0.04    0.59
   4 -13   0    2.64    0.67
  -4  13   0    2.79    0.65
   4 -13   1    0.02    0.20
  -4  13  -1   -0.03    0.21
   4 -13   2   14.92    2.03
   4 -13   2   11.28    0.91
  -4  13  -2   13.08    0.96
   4 -13   3    5.33    1.36
   4 -13   3    0.57    0.72
  -4  13  -3    2.86    0.54
   4 -13   4    2.40    1.35
   4 -13   5    1.03    1.16
   4 -13   6   14.80    2.32
   4 -13   7    1.90    1.42
   4 -13   8    0.50    1.09
   4 -12 -11    0.31    0.76
  -4  12  11    0.00    0.76
   4 -12 -10   -0.44    0.74
  -4  12  10    0.00    0.74
   4 -12  -9    6.09    1.19
  -4  12   9    0.00    1.24
   4 -12  -8    3.79    1.34
  -4  12   8    0.00    0.92
   4 -12  -7    3.72    1.05
  -4  12   7    4.30    1.05
   4 -12  -6    1.17    0.73
  -4  12   6    1.20    0.73
   4 -12  -5    5.51    1.60
  -4  12   5    7.85    1.02
   4 -12  -4   -0.33    0.41
  -4  12   4    0.02    0.42
   4 -12  -3    0.15    0.33
  -4  12   3   -0.10    0.52
   4 -12  -2   -0.02    0.34
  -4  12   2    0.13    0.29
   4 -12  -1   11.26    1.00
  -4  12   1   11.21    0.90
   4 -12   0    1.04    0.72
  -4  12   0    0.79    0.45
   4 -12   1    0.99    0.73
  -4  12  -1    1.79    0.77
   4 -12   2    1.73    0.73
  -4  12  -2    2.06    0.52
   4 -12   3   13.67    1.83
   4 -12   3    9.11    1.00
  -4  12  -3    9.59    0.79
   4 -12   4   -0.72    0.58
   4 -12   4    0.08    0.17
  -4  12  -4    0.07    0.34
   4 -12   5    0.13    0.62
  -4  12  -5    0.04    0.30
   4 -12   6   24.61    3.68
   4 -12   7    0.27    0.85
   4 -12   8    5.70    2.60
   4 -12   9    1.80    1.32
   4 -11 -12    3.26    1.27
  -4  11  12    0.00    1.27
   4 -11 -11    0.96    0.90
  -4  11  11   -0.01    0.91
   4 -11 -10    4.62    1.58
  -4  11  10    0.00    1.04
   4 -11  -9    0.62    0.70
  -4  11   9    0.00    0.69
   4 -11  -8    7.40    1.11
  -4  11   8    0.00    1.16
   4 -11  -7    1.08    1.05
  -4  11   7    0.36    1.06
   4 -11  -6    1.88    0.73
  -4  11   6    1.60    0.75
   4 -11  -5    8.71    1.01
  -4  11   5    8.36    1.03
   4 -11  -4   10.09    1.00
  -4  11   4   10.99    1.04
   4 -11  -3    0.05    0.33
  -4  11   3    0.17    0.34
   4 -11  -2    3.70    0.65
  -4  11   2    4.97    0.66
   4 -11  -1    5.09    0.64
  -4  11   1    5.99    0.68
   4 -11   0   13.22    1.32
  -4  11   0   13.72    0.90
   4 -11   1    1.28    0.40
  -4  11  -1    0.97    0.43
   4 -11   2    4.27    0.51
  -4  11  -2    4.80    0.60
   4 -11   3    1.01    0.32
  -4  11  -3    1.18    0.43
   4 -11   4    4.90    1.24
   4 -11   4    3.36    0.39
  -4  11  -4    2.64    0.52
   4 -11   5    0.02    1.11
   4 -11   5    0.23    0.18
  -4  11  -5    0.00    0.42
   4 -11   6   12.93    1.72
   4 -11   6    9.82    0.59
   4 -11   7   14.14    1.94
   4 -11   8    4.23    1.47
   4 -11   9    0.02    0.54
   4 -11  10    1.89    1.96
   4 -10 -13    0.83    0.96
  -4  10  13    0.01    0.95
   4 -10 -12    9.43    1.57
  -4  10  12    0.01    1.55
   4 -10 -11    7.87    1.91
  -4  10  11    0.00    1.25
   4 -10 -10    3.67    1.06
  -4  10  10    0.00    1.06
   4 -10  -9   -0.49    0.64
  -4  10   9    0.00    0.64
   4 -10  -8    4.41    1.54
  -4  10   8    4.00    1.07
   4 -10  -7    0.55    0.56
  -4  10   7    0.20    0.58
   4 -10  -6    3.00    0.79
  -4  10   6    2.68    1.26
   4 -10  -5    8.67    0.96
  -4  10   5    9.83    1.00
   4 -10  -4    6.72    0.85
  -4  10   4    9.58    1.30
   4 -10  -3    0.68    0.70
  -4  10   3    0.90    0.47
   4 -10  -2    2.12    0.49
  -4  10   2    2.17    0.54
   4 -10  -1   42.75    1.48
  -4  10   1   45.34    1.58
   4 -10   0    1.40    0.55
  -4  10   0    1.27    0.44
   4 -10   1    0.82    0.30
  -4  10  -1    0.85    0.39
   4 -10   2   -0.10    0.20
  -4  10  -2   -0.01    0.38
   4 -10   3   20.42    1.04
  -4  10  -3   19.27    1.33
   4 -10   4   16.48    0.66
  -4  10  -4   16.16    1.29
   4 -10   5    0.45    0.20
   4 -10   5    1.08    0.77
  -4  10  -5    0.37    0.33
   4 -10   6    4.77    1.23
   4 -10   6    3.95    0.47
   4 -10   7   25.31    2.05
   4 -10   7   20.75    0.77
   4 -10   8    0.05    0.14
   4 -10   8    0.20    0.22
   4 -10   8    0.46    0.63
   4 -10   9    1.18    0.99
   4 -10  10    1.48    1.09
   4 -10  11    2.60    1.25
   4  -9 -13    2.78    1.29
  -4   9  13    0.00    1.89
   4  -9 -12    3.53    1.38
  -4   9  12    4.36    2.07
   4  -9 -11   11.63    1.57
  -4   9  11    0.00    2.32
   4  -9 -10    0.26    0.60
  -4   9  10    0.00    0.57
   4  -9  -9    0.53    0.64
  -4   9   9    0.27    0.66
   4  -9  -8   10.33    1.26
  -4   9   8   11.48    1.32
   4  -9  -7   14.15    1.91
  -4   9   7   14.38    1.32
   4  -9  -6    1.68    0.69
  -4   9   6    2.96    0.74
   4  -9  -5    3.75    0.75
  -4   9   5    4.04    0.76
   4  -9  -4   19.48    1.13
  -4   9   4   22.96    1.23
   4  -9  -3    6.59    0.72
  -4   9   3    8.14    0.76
   4  -9  -2    0.49    0.31
  -4   9   2    0.22    0.35
   4  -9  -1    3.84    0.49
  -4   9   1    3.60    0.88
   4  -9   0   59.77    1.65
  -4   9   0   61.21    1.85
   4  -9   1   10.30    0.60
  -4   9  -1   10.88    0.74
   4  -9   2   22.78    0.79
  -4   9  -2   24.07    1.36
   4  -9   3    0.09    0.16
  -4   9  -3    0.18    0.25
   4  -9   4   17.70    0.61
  -4   9  -4   18.58    0.91
   4  -9   5    2.61    0.27
  -4   9  -5    3.00    0.73
   4  -9   6    0.46    0.60
   4  -9   6   -0.23    0.14
  -4   9  -6   -0.10    0.26
   4  -9   7   15.67    1.62
   4  -9   7   13.98    0.51
   4  -9   8    3.44    0.42
   4  -9   8    3.41    0.26
   4  -9   8    4.21    1.13
   4  -9   9    0.13    0.29
   4  -9   9    0.07    0.12
   4  -9   9    0.70    0.59
   4  -9  10    2.78    1.15
   4  -9  11    4.14    1.28
   4  -8 -14    2.78    0.91
   4  -8 -14    1.53    1.37
  -4   8  14    0.05    1.99
   4  -8 -13   -0.12    0.80
  -4   8  13   -0.34    1.14
   4  -8 -12    1.72    1.12
  -4   8  12    2.74    1.68
   4  -8 -11   15.83    1.89
  -4   8  11   20.03    2.68
   4  -8 -10    1.62    1.48
  -4   8  10    2.49    1.47
   4  -8  -9    2.95    1.00
  -4   8   9    4.08    1.01
   4  -8  -8    6.58    1.62
  -4   8   8    8.12    1.12
   4  -8  -7   21.29    1.44
  -4   8   7   22.63    1.50
   4  -8  -6    1.87    0.98
  -4   8   6    1.51    0.66
   4  -8  -5    0.61    0.46
  -4   8   5    0.99    0.51
   4  -8  -4    4.23    0.93
  -4   8   4    4.33    0.69
   4  -8  -3   27.02    1.13
  -4   8   3   26.66    1.21
   4  -8  -2    7.91    0.63
  -4   8   2    9.07    1.05
   4  -8  -1    0.92    0.33
  -4   8   1    1.05    0.58
   4  -8   0   30.50    0.99
  -4   8   0   27.68    1.53
   4  -8   1  188.81    4.33
  -4   8  -1  168.23    4.04
   4  -8   2   30.58    0.92
  -4   8  -2   27.54    1.45
   4  -8   3   11.81    0.52
  -4   8  -3   11.05    0.73
   4  -8   4    4.04    0.50
  -4   8  -4    4.13    0.51
   4  -8   5    5.49    0.36
  -4   8  -5    5.11    0.89
   4  -8   6    0.16    0.48
   4  -8   6    0.09    0.13
  -4   8  -6   -0.03    0.36
   4  -8   7    0.52    1.17
   4  -8   7    0.96    0.20
   4  -8   8   29.15    1.99
   4  -8   8   26.43    0.96
   4  -8   9    2.52    0.46
   4  -8   9    2.56    0.28
   4  -8   9    3.18    1.00
   4  -8  10    3.64    0.33
   4  -8  10    5.40    1.14
   4  -8  10    4.27    0.50
   4  -8  11    0.00    0.20
   4  -8  11    0.52    0.48
   4  -8  11    0.00    0.20
   4  -8  12   11.77    1.59
   4  -7 -14    1.25    1.14
   4  -7 -14    1.37    0.78
  -4   7  14   -0.20    1.61
   4  -7 -13    0.27    1.26
  -4   7  13    0.27    1.12
   4  -7 -12    0.20    0.71
  -4   7  12    0.29    1.03
   4  -7 -11   22.20    2.87
  -4   7  11   20.40    2.65
   4  -7 -10    4.44    1.12
  -4   7  10    4.92    1.63
   4  -7  -9    3.24    1.47
  -4   7   9    3.45    1.42
   4  -7  -8    1.11    0.60
  -4   7   8    0.19    0.62
   4  -7  -7    0.94    0.82
  -4   7   7    0.28    0.52
   4  -7  -6   23.70    1.30
  -4   7   6   21.55    1.34
   4  -7  -5    0.73    0.41
  -4   7   5    0.34    0.46
   4  -7  -4    0.98    0.41
  -4   7   4    0.63    0.44
   4  -7  -3   11.35    0.73
  -4   7   3   11.23    0.81
   4  -7  -2   13.18    1.01
  -4   7   2   13.62    1.16
   4  -7  -1    3.85    0.45
  -4   7   1    3.95    0.77
   4  -7   0    0.58    0.25
  -4   7   0    0.08    0.50
   4  -7   1  111.11    2.40
  -4   7  -1  109.37    2.71
   4  -7   2    0.61    0.37
  -4   7  -2    0.42    0.47
   4  -7   3   30.70    0.87
  -4   7  -3   30.77    1.15
   4  -7   4    0.33    0.21
  -4   7  -4    0.67    0.31
   4  -7   5   30.12    0.84
  -4   7  -5   28.70    1.18
   4  -7   6    0.28    0.18
  -4   7  -6    0.34    0.46
   4  -7   7    1.68    0.75
   4  -7   7    1.13    0.25
   4  -7   8   10.68    1.24
   4  -7   8    9.46    0.49
   4  -7   9   24.29    1.74
   4  -7   9   23.09    1.48
   4  -7   9   22.04    1.03
   4  -7  10    0.20    0.17
   4  -7  10   -0.20    0.47
   4  -7  10   -0.12    0.26
   4  -7  11    0.00    0.36
   4  -7  11   -0.16    0.65
   4  -7  11    0.05    0.16
   4  -7  12    4.47    0.65
   4  -7  12    3.41    0.70
   4  -7  12    4.15    1.10
   4  -7  13    4.32    1.16
   4  -7  15    0.00    0.37
   4  -6 -15    0.69    0.99
   4  -6 -15    0.76    0.71
  -4   6  15    0.00    0.91
   4  -6 -14   14.74    2.11
   4  -6 -14   15.75    1.50
  -4   6  14   14.97    1.93
   4  -6 -13    1.56    0.84
   4  -6 -13    2.95    1.17
  -4   6  13    2.60    1.63
   4  -6 -12   -0.27    0.54
  -4   6  12    0.37    0.76
   4  -6 -11    5.57    1.21
  -4   6  11    6.10    1.75
   4  -6 -10    7.98    1.25
  -4   6  10    8.18    1.77
   4  -6  -9   14.83    1.38
  -4   6   9   15.91    1.36
   4  -6  -8    0.23    0.50
  -4   6   8    0.33    0.49
   4  -6  -7   29.37    1.48
  -4   6   7   27.56    1.53
   4  -6  -6   98.69    3.41
  -4   6   6   95.93    2.96
   4  -6  -5    5.32    0.66
  -4   6   5    5.56    0.74
   4  -6  -4    5.11    0.57
  -4   6   4    4.28    0.63
   4  -6  -3    8.01    0.60
  -4   6   3    7.02    0.68
   4  -6  -2   11.34    0.66
  -4   6   2   10.94    0.73
   4  -6  -1    0.23    0.24
  -4   6   1    0.53    0.45
   4  -6   0    0.19    0.21
  -4   6   0    0.32    0.27
   4  -6   1   42.05    1.12
  -4   6  -1   42.26    1.33
   4  -6   2    8.92    0.48
  -4   6  -2    7.97    0.60
   4  -6   3   13.63    0.56
  -4   6  -3   14.22    1.06
   4  -6   4    0.94    0.25
  -4   6  -4    0.76    0.36
   4  -6   5    6.22    0.41
  -4   6  -5    6.31    0.61
   4  -6   6   22.01    0.74
  -4   6  -6   21.49    1.02
   4  -6   7    0.77    0.57
   4  -6   7    0.45    0.23
   4  -6   8    0.85    0.60
   4  -6   8    0.66    0.26
   4  -6   9    2.26    0.56
   4  -6   9    2.39    0.59
   4  -6   9    3.79    0.83
   4  -6  10    6.36    1.06
   4  -6  10    5.19    0.51
   4  -6  10    6.30    1.54
   4  -6  11    0.39    0.38
   4  -6  11    0.59    0.87
   4  -6  11    0.26    0.28
   4  -6  12    0.35    0.28
   4  -6  12    0.04    0.53
   4  -6  12    0.00    0.37
   4  -6  13   13.66    1.52
   4  -6  13   15.58    1.18
   4  -6  13   14.60    1.40
   4  -6  14    0.12    0.29
   4  -6  14   -0.14    0.54
   4  -6  15    0.00    0.28
   4  -5 -15    1.39    0.79
   4  -5 -15    1.07    1.05
  -4   5  15    0.07    0.96
   4  -5 -14    0.37    0.65
   4  -5 -14    0.17    0.77
  -4   5  14   -0.17    0.60
   4  -5 -13   13.97    1.84
   4  -5 -13   15.73    2.10
  -4   5  13   16.21    1.70
   4  -5 -12    1.01    0.63
   4  -5 -12    0.46    0.81
  -4   5  12    0.04    1.15
   4  -5 -11    0.75    0.71
  -4   5  11    0.27    1.02
   4  -5 -10    8.77    1.79
  -4   5  10    9.54    1.18
   4  -5  -9   29.45    1.74
  -4   5   9   31.49    1.71
   4  -5  -8    0.08    0.31
  -4   5   8   -0.03    0.31
   4  -5  -7  106.04    3.12
  -4   5   7  103.03    3.15
   4  -5  -6  113.26    3.15
  -4   5   6  114.09    3.24
   4  -5  -5   51.70    1.67
  -4   5   5   51.97    1.77
   4  -5  -4   12.12    1.10
  -4   5   4   11.96    0.81
   4  -5  -3    0.16    0.22
  -4   5   3   -0.04    0.24
   4  -5  -2   17.43    0.74
  -4   5   2   15.73    0.82
   4  -5  -1    6.81    0.51
  -4   5   1    7.79    0.58
   4  -5   0    0.15    0.18
  -4   5   0    0.00    0.22
   4  -5   1   22.09    0.77
  -4   5  -1   23.63    0.91
   4  -5   2   19.04    0.68
  -4   5  -2   18.50    0.82
   4  -5   3   13.94    0.59
  -4   5  -3   13.61    0.78
   4  -5   4   -0.21    0.26
  -4   5  -4    0.09    0.39
   4  -5   5    0.63    0.25
  -4   5  -5    1.06    0.56
   4  -5   6   40.21    1.15
  -4   5  -6   37.96    1.81
   4  -5   7    7.41    0.52
   4  -5   8    1.57    0.89
   4  -5   8    0.93    0.49
   4  -5   9    5.84    0.73
   4  -5   9    8.10    1.41
   4  -5   9    6.78    0.56
   4  -5  10    0.48    0.45
   4  -5  10    0.85    0.35
   4  -5  10    0.24    0.88
   4  -5  11    1.69    0.63
   4  -5  11    2.01    0.73
   4  -5  11    3.06    1.13
   4  -5  12   -0.15    0.26
   4  -5  12    0.08    0.18
   4  -5  12   -0.04    0.35
   4  -5  13   20.64    1.57
   4  -5  13   19.76    1.97
   4  -5  13   19.35    1.22
   4  -5  14    1.66    0.80
   4  -5  14    1.98    0.96
   4  -5  14    1.99    1.10
   4  -5  15    1.67    0.95
   4  -5  15    0.00    0.68
   4  -5  15    0.96    0.87
   4  -5  16    0.24    0.69
   4  -5  16   -0.06    0.46
   4  -5  16    0.22    0.64
   4  -4 -15    1.49    0.97
   4  -4 -15    1.10    0.81
  -4   4  15   -0.01    0.91
   4  -4 -14   14.01    1.51
   4  -4 -14   12.79    2.76
  -4   4  14   14.12    1.66
   4  -4 -13    2.73    0.84
   4  -4 -13    3.60    1.06
  -4   4  13   -0.05    0.94
   4  -4 -12    8.90    1.15
   4  -4 -12    8.50    2.03
  -4   4  12    9.83    1.27
   4  -4 -11    0.14    0.50
   4  -4 -11    0.36    0.59
  -4   4  11    0.38    0.54
   4  -4 -10    5.94    1.04
  -4   4  10    7.46    1.02
   4  -4  -9   15.28    1.28
  -4   4   9   15.00    1.23
   4  -4  -8    0.74    0.49
  -4   4   8    0.21    0.48
   4  -4  -7   73.34    2.29
  -4   4   7   74.37    2.40
   4  -4  -6    3.25    0.92
  -4   4   6    3.85    1.01
   4  -4  -5   58.19    1.76
  -4   4   5   55.28    1.77
   4  -4  -4    2.24    0.44
  -4   4   4    1.56    0.74
   4  -4  -3    0.21    0.28
  -4   4   3    0.55    0.30
   4  -4  -2   19.33    0.79
  -4   4   2   19.87    0.85
   4  -4  -1   57.84    1.45
  -4   4   1   56.70    1.56
   4  -4   0    9.49    0.54
  -4   4   0    8.84    0.60
   4  -4   1    9.62    0.53
  -4   4  -1   10.39    0.62
   4  -4   2   44.32    1.44
  -4   4  -2   39.60    1.26
   4  -4   3    3.38    0.37
  -4   4  -3    4.68    0.51
   4  -4   4   20.04    0.73
  -4   4  -4   20.29    0.94
   4  -4   5   67.26    1.67
  -4   4  -5   68.13    2.01
   4  -4   6   56.03    1.51
  -4   4  -6   56.80    2.26
   4  -4   7   13.27    0.69
   4  -4   8   10.04    0.93
   4  -4   8    8.81    0.65
   4  -4   9   11.53    1.48
   4  -4   9   11.47    0.78
   4  -4  10    1.56    0.56
   4  -4  10    2.23    0.93
   4  -4  10    1.23    0.70
   4  -4  11    0.15    0.35
   4  -4  11    0.35    0.42
   4  -4  11    0.50    0.68
   4  -4  12    0.35    0.74
   4  -4  12    0.22    0.48
   4  -4  12    0.42    0.40
   4  -4  13   24.67    2.20
   4  -4  13   24.55    1.56
   4  -4  13   22.75    1.92
   4  -4  14   13.55    1.83
   4  -4  14   12.67    1.76
   4  -4  14   12.97    1.34
   4  -4  15    0.38    0.58
   4  -4  15    0.47    0.62
   4  -4  15    0.58    0.57
   4  -4  16    0.82    0.76
   4  -4  16    0.57    0.73
   4  -4  16    1.62    0.68
   4  -3 -15    4.22    1.50
   4  -3 -15    5.52    1.96
  -4   3  15    7.79    1.33
   4  -3 -14    2.15    1.68
   4  -3 -14    3.74    0.92
  -4   3  14   -0.02    0.93
   4  -3 -13    0.66    0.59
   4  -3 -13   -0.01    0.71
  -4   3  13    0.38    0.62
   4  -3 -12   14.52    1.33
   4  -3 -12   12.85    1.45
  -4   3  12   11.46    1.34
   4  -3 -11    1.60    0.71
   4  -3 -11    1.51    0.80
  -4   3  11    2.01    0.74
   4  -3 -10   -0.60    0.69
   4  -3 -10    3.15    0.75
  -4   3  10    3.76    0.71
   4  -3  -9    6.57    0.92
  -4   3   9    7.41    0.92
   4  -3  -8   22.72    1.28
  -4   3   8   21.57    1.27
   4  -3  -7    2.57    0.58
  -4   3   7    2.94    0.95
   4  -3  -6   18.00    0.99
  -4   3   6   16.65    1.02
   4  -3  -5   24.41    1.03
  -4   3   5   21.74    1.04
   4  -3  -4   34.55    1.16
  -4   3   4   34.98    1.22
   4  -3  -3   12.98    0.68
  -4   3   3   12.37    1.06
   4  -3  -2    0.58    0.26
  -4   3   2    0.14    0.27
   4  -3  -1   18.58    0.75
  -4   3   1   16.80    1.08
   4  -3   0    5.07    0.45
  -4   3   0    5.36    0.50
   4  -3   1    6.38    0.70
  -4   3  -1    5.74    0.51
   4  -3   2   74.87    1.77
  -4   3  -2   76.85    2.01
   4  -3   3  181.84    3.80
  -4   3  -3  186.26    4.76
   4  -3   4   72.41    2.07
  -4   3  -4   69.92    2.00
   4  -3   5  167.68    3.71
  -4   3  -5  163.72    4.05
   4  -3   6   46.27    1.41
  -4   3  -6   44.24    1.58
   4  -3   7   99.19    2.58
   4  -3   8    0.57    0.38
   4  -3   8    0.04    0.48
   4  -3   9   15.92    1.02
   4  -3   9   17.08    0.96
   4  -3  10   44.14    2.51
   4  -3  10   47.58    2.31
   4  -3  10   48.69    2.36
   4  -3  11    3.64    0.76
   4  -3  11    3.38    0.65
   4  -3  11    2.96    0.66
   4  -3  12   -0.27    0.37
   4  -3  12    0.36    0.32
   4  -3  12   -0.36    0.33
   4  -3  13   -0.05    0.30
   4  -3  13    0.07    0.38
   4  -3  13   -0.28    0.55
   4  -3  14    9.38    0.96
   4  -3  14    8.24    1.23
   4  -3  14    8.56    1.14
   4  -3  15    2.15    0.70
   4  -3  15    3.04    1.41
   4  -3  15    2.48    0.87
   4  -3  16    1.94    0.70
   4  -3  16    2.43    1.45
   4  -3  16    1.87    0.91
   4  -3  17    0.73    0.62
   4  -3  17   -0.38    0.45
   4  -3  17    1.29    0.94
   4  -2 -16    0.00    0.87
   4  -2 -16   -0.16    0.97
  -4   2  16    2.97    1.24
   4  -2 -15   -0.07    1.02
   4  -2 -15    0.00    1.08
  -4   2  15    7.38    1.41
   4  -2 -14    0.84    0.75
  -4   2  14    0.71    0.71
   4  -2 -13    0.45    0.95
   4  -2 -13    0.17    0.70
  -4   2  13    0.57    0.59
   4  -2 -12    1.09    0.68
   4  -2 -12    0.82    0.75
  -4   2  12    1.02    0.65
   4  -2 -11   12.05    1.21
   4  -2 -11   13.91    1.93
  -4   2  11   12.70    1.17
   4  -2 -10    0.02    0.42
   4  -2 -10    0.08    0.43
  -4   2  10    0.33    0.39
   4  -2  -9    1.22    0.59
   4  -2  -9    0.91    0.58
  -4   2   9    1.46    0.56
   4  -2  -8   40.26    1.60
  -4   2   8   43.47    2.22
   4  -2  -7    1.22    0.73
  -4   2   7    1.22    0.47
   4  -2  -6    0.92    0.38
  -4   2   6    0.28    0.39
   4  -2  -5    3.72    0.51
  -4   2   5    3.24    0.53
   4  -2  -4    6.94    0.58
  -4   2   4    7.59    0.62
   4  -2  -3   65.04    2.03
  -4   2   3   61.66    1.69
   4  -2  -2    3.74    0.44
  -4   2   2    4.27    0.48
   4  -2  -1   12.31    0.63
  -4   2   1   11.80    0.67
   4  -2   0   13.81    0.62
  -4   2   0   11.74    0.68
   4  -2   1    0.24    0.21
  -4   2  -1    0.12    0.24
   4  -2   2   42.93    1.19
  -4   2  -2   44.20    1.71
   4  -2   3  120.68    3.04
  -4   2  -3  121.37    2.98
   4  -2   4  222.71    4.78
  -4   2  -4  226.02    5.32
   4  -2   5  135.04    3.16
  -4   2  -5  132.83    3.95
   4  -2   6   10.69    0.71
  -4   2  -6   10.43    0.81
   4  -2   7  178.73    4.32
   4  -2   8    5.42    0.62
   4  -2   8    6.94    0.99
   4  -2   9    4.56    0.59
   4  -2   9    5.52    0.66
   4  -2  10    3.30    1.16
   4  -2  10    3.75    0.60
   4  -2  10    4.75    0.70
   4  -2  11   47.63    2.12
   4  -2  11   52.85    1.78
   4  -2  11   46.20    2.01
   4  -2  12   11.00    0.88
   4  -2  12    8.91    1.12
   4  -2  12   10.60    1.06
   4  -2  13    3.72    0.65
   4  -2  13    3.89    1.30
   4  -2  13    4.09    1.41
   4  -2  14    0.50    0.37
   4  -2  14   -0.41    0.88
   4  -2  14   -0.61    0.79
   4  -2  15   11.08    1.48
   4  -2  15   13.97    1.59
   4  -2  15   14.17    2.15
   4  -2  16    0.68    0.70
   4  -2  16    0.68    0.73
   4  -2  16   -0.64    1.08
   4  -2  17    5.80    1.33
   4  -2  17    4.87    1.30
   4  -2  17    6.50    1.94
   4  -1 -16    0.00    0.86
   4  -1 -16   -0.02    0.89
  -4   1  16    1.15    0.71
   4  -1 -15    0.00    0.97
   4  -1 -15    0.01    0.98
  -4   1  15    2.62    0.79
   4  -1 -14    3.17    1.08
  -4   1  14    2.62    1.38
   4  -1 -13   -0.12    0.53
   4  -1 -13   -0.02    0.56
  -4   1  13   -0.43    0.72
   4  -1 -12    0.15    0.49
   4  -1 -12    0.13    0.48
  -4   1  12    0.11    0.65
   4  -1 -11   23.49    1.56
   4  -1 -11   21.34    2.18
  -4   1  11   25.33    1.99
   4  -1 -10    7.82    0.99
   4  -1 -10    7.15    0.97
  -4   1  10    7.54    1.30
   4  -1  -9    1.71    0.59
   4  -1  -9    1.43    0.97
  -4   1   9    1.38    0.55
   4  -1  -8   17.49    1.17
   4  -1  -8   18.78    1.07
  -4   1   8   16.96    1.03
   4  -1  -7    6.84    0.71
  -4   1   7    6.91    0.69
   4  -1  -6    5.82    0.61
  -4   1   6    6.53    0.96
   4  -1  -5   11.83    0.71
  -4   1   5   11.86    0.74
   4  -1  -4    7.74    0.58
  -4   1   4    7.30    0.61
   4  -1  -3  187.17    3.94
  -4   1   3  184.51    4.53
   4  -1  -2   25.83    1.21
  -4   1   2   25.55    1.32
   4  -1  -1    1.65    0.35
  -4   1   1    1.71    0.38
   4  -1   0   46.89    1.25
  -4   1   0   46.01    1.36
   4  -1   1   40.62    1.16
  -4   1  -1   41.28    1.64
   4  -1   2   12.57    0.65
  -4   1  -2   13.17    0.75
   4  -1   3   14.69    0.71
  -4   1  -3   15.02    0.85
   4  -1   4   59.50    1.67
  -4   1  -4   61.57    2.31
   4  -1   5   -0.03    0.23
  -4   1  -5    0.23    0.27
   4  -1   6   14.94    0.84
   4  -1   7   13.45    0.86
   4  -1   8   27.21    1.02
   4  -1   8   27.87    1.75
   4  -1   9    1.91    0.73
   4  -1   9    5.99    0.73
   4  -1   9    4.28    0.68
   4  -1  10    5.69    1.34
   4  -1  10    6.69    1.22
   4  -1  10    6.53    0.59
   4  -1  11   28.60    1.51
   4  -1  11   26.27    1.63
   4  -1  11   26.30    1.53
   4  -1  12    6.90    0.64
   4  -1  12    6.98    0.98
   4  -1  12    7.58    1.58
   4  -1  13    0.52    0.35
   4  -1  13    0.53    0.59
   4  -1  13    1.03    1.00
   4  -1  14    0.55    0.63
   4  -1  14    0.64    0.69
   4  -1  14    0.47    0.36
   4  -1  15    9.90    0.83
   4  -1  15   11.22    1.54
   4  -1  15   10.53    1.42
   4  -1  16   16.92    1.07
   4  -1  16   18.56    1.83
   4  -1  16   21.43    1.95
   4  -1  17    4.95    2.12
   4  -1  17    5.97    1.40
   4   0 -15   -0.01    0.85
   4   0 -15   -0.17    0.80
  -4   0  15    1.39    0.65
   4   0 -14    6.23    1.41
   4   0 -14    0.09    1.94
  -4   0  14    7.85    1.03
   4   0 -13   -0.19    0.49
   4   0 -13    0.02    0.46
  -4   0  13    0.22    0.37
   4   0 -12    3.89    1.00
   4   0 -12    3.05    0.93
  -4   0  12    4.52    0.79
   4   0 -11   24.46    2.24
   4   0 -11   32.83    1.87
  -4   0  11   33.31    1.52
   4   0 -10    3.27    0.76
   4   0 -10    4.19    0.85
  -4   0  10    3.39    0.66
   4   0  -9    0.00    0.20
   4   0  -9   -0.64    0.36
  -4   0   9    0.16    0.19
   4   0  -8   12.63    1.04
   4   0  -8   12.15    0.89
  -4   0   8   12.12    0.85
   4   0  -7   26.75    1.15
   4   0  -7   27.69    1.35
  -4   0   7   26.92    1.16
   4   0  -6   16.39    0.83
  -4   0   6   14.46    0.83
   4   0  -5  187.43    4.11
  -4   0   5  179.41    4.08
   4   0  -4  123.22    3.10
  -4   0   4  111.80    2.65
   4   0  -3  337.02    6.90
  -4   0   3  316.36    6.78
   4   0  -2   12.34    0.64
  -4   0   2   12.77    0.69
   4   0  -1   43.84    1.20
  -4   0   1   41.14    1.63
   4   0   0   15.92    0.68
  -4   0   0   15.48    0.76
   4   0   1   79.27    1.91
  -4   0  -1   73.86    1.97
   4   0   2   -0.16    0.16
  -4   0  -2    0.27    0.20
   4   0   3    1.80    0.39
  -4   0  -3    1.79    0.73
   4   0   4   77.35    2.05
  -4   0  -4   74.88    2.19
   4   0   5   90.83    2.39
  -4   0  -5   92.50    2.62
   4   0   6   16.45    0.93
   4   0   7    1.88    0.50
   4   0   8   15.22    0.64
   4   0   8   14.77    1.45
   4   0   9   33.87    1.65
   4   0   9   30.92    1.53
   4   0   9   34.99    1.03
   4   0  10   15.84    1.28
   4   0  10   17.09    0.99
   4   0  10   15.37    1.16
   4   0  11    2.54    1.19
   4   0  11    2.89    0.41
   4   0  11    2.69    0.83
   4   0  12    6.01    0.94
   4   0  12    4.02    0.70
   4   0  12    4.53    1.47
   4   0  13    3.79    0.92
   4   0  13    2.88    0.43
   4   0  13    3.32    0.98
   4   0  14    0.65    0.80
   4   0  14    1.26    0.36
   4   0  14    1.51    0.84
   4   0  15    1.55    0.76
   4   0  15    0.57    0.52
   4   0  15   -0.48    0.81
   4   0  16   23.24    1.11
   4   0  16   30.87    2.30
   4   0  16   29.58    2.26
   4   0  17    3.19    1.31
   4   0  17    4.30    1.37
   4   0  18   -0.16    1.44
   4   0  18    0.77    0.92
   4   1 -15   -0.01    0.82
   4   1 -15   -0.08    1.05
  -4  -1  15    0.99    0.88
   4   1 -14   12.74    1.76
   4   1 -14   13.80    1.50
  -4  -1  14   12.24    1.81
   4   1 -13   -0.08    0.58
   4   1 -13   -0.11    0.50
  -4  -1  13   -0.21    0.61
   4   1 -12    6.95    1.24
   4   1 -12    5.84    0.99
  -4  -1  12    6.31    1.26
   4   1 -11   11.76    1.62
   4   1 -11   12.94    2.07
  -4  -1  11   12.85    1.43
   4   1 -10    6.12    0.97
   4   1 -10    5.67    0.81
  -4  -1  10    4.38    1.12
   4   1  -9    0.13    0.31
   4   1  -9   -0.24    0.40
  -4  -1   9    0.26    0.30
   4   1  -8    1.40    0.61
   4   1  -8    1.44    0.46
  -4  -1   8    1.12    0.45
   4   1  -7   15.13    0.86
   4   1  -7   15.65    1.10
  -4  -1   7   16.10    0.87
   4   1  -6   49.57    2.32
   4   1  -6   48.29    1.46
  -4  -1   6   46.22    1.45
   4   1  -5    6.44    0.73
   4   1  -5    7.30    0.83
  -4  -1   5    6.92    0.85
   4   1  -4  189.58    3.98
  -4  -1   4  182.88    4.05
   4   1  -3  129.58    2.79
  -4  -1   3  126.63    2.88
   4   1  -2   15.98    0.69
  -4  -1   2   15.00    0.73
   4   1  -1   12.93    0.87
  -4  -1   1   12.97    0.97
   4   1   0    8.61    0.55
  -4  -1   0    9.48    0.63
   4   1   1   69.00    1.75
  -4  -1  -1   64.88    1.80
   4   1   2   46.61    1.35
  -4  -1  -2   46.66    1.53
   4   1   3   42.30    1.36
  -4  -1  -3   42.36    1.49
   4   1   4   16.08    0.85
  -4  -1  -4   16.31    0.98
   4   1   5   28.44    1.17
  -4  -1  -5   27.59    1.28
   4   1   6    7.36    0.73
   4   1   7   21.58    1.62
   4   1   8    0.90    0.22
   4   1   8    1.05    0.50
   4   1   9  115.46    4.22
   4   1   9  115.79    3.63
   4   1   9  118.45    2.61
   4   1  10    1.97    0.43
   4   1  10    2.21    0.75
   4   1  10    2.09    0.68
   4   1  11    1.13    0.63
   4   1  11    0.88    0.37
   4   1  11    0.99    0.69
   4   1  12    9.51    1.28
   4   1  12   11.44    0.51
   4   1  12   11.65    1.33
   4   1  13    3.49    0.90
   4   1  13    1.78    0.48
   4   1  13    4.37    1.48
   4   1  14    1.00    0.27
   4   1  14    1.31    0.82
   4   1  14    0.55    0.85
   4   1  15    0.02    0.77
   4   1  15    1.23    0.84
   4   1  16   10.79    1.71
   4   1  16   11.57    2.60
   4   1  17    1.89    1.07
   4   1  17    0.42    1.09
   4   1  18    0.42    0.90
   4   1  18    0.35    0.92
   4   2 -15    0.18    0.72
   4   2 -15    0.01    1.42
  -4  -2  15    0.75    0.58
   4   2 -14   -0.01    1.26
   4   2 -14    0.13    0.94
  -4  -2  14    4.73    0.77
   4   2 -13    5.17    1.33
   4   2 -13    5.79    1.04
  -4  -2  13    5.53    0.87
   4   2 -12   -0.29    0.65
   4   2 -12   -0.21    0.72
  -4  -2  12   -0.24    0.40
   4   2 -11    1.54    0.88
   4   2 -11    1.69    0.98
  -4  -2  11    1.78    0.55
   4   2 -10    1.51    0.83
   4   2 -10    2.16    0.58
  -4  -2  10    2.22    0.54
   4   2  -9    9.90    1.13
   4   2  -9    8.61    0.80
  -4  -2   9   10.15    1.11
   4   2  -8    2.58    0.74
   4   2  -8    2.90    0.50
  -4  -2   8    2.64    0.51
   4   2  -7    1.11    0.61
   4   2  -7    1.29    0.40
  -4  -2   7    1.91    0.43
   4   2  -6   73.56    2.36
   4   2  -6   74.12    2.30
  -4  -2   6   74.82    1.99
   4   2  -5   89.87    2.11
   4   2  -5   83.19    2.50
  -4  -2   5   82.61    2.11
   4   2  -4    0.19    0.20
   4   2  -4    0.19    0.47
  -4  -2   4    0.03    0.23
   4   2  -3   10.97    0.77
   4   2  -3   11.79    0.59
  -4  -2   3   11.86    0.65
   4   2  -2  128.15    3.05
  -4  -2   2  119.28    2.77
   4   2  -1   18.19    0.72
  -4  -2   1   19.33    1.16
   4   2   0   38.83    1.16
  -4  -2   0   38.93    1.29
   4   2   1    0.76    0.28
  -4  -2  -1    0.34    0.33
   4   2   2    7.08    0.58
  -4  -2  -2    7.41    0.66
   4   2   3   10.44    0.98
  -4  -2  -3    8.71    0.77
   4   2   4    6.22    0.63
  -4  -2  -4    5.66    0.70
   4   2   5   11.36    0.85
   4   2   6   66.40    2.57
   4   2   7    3.63    0.65
   4   2   8   22.01    0.52
   4   2   8   21.19    1.28
   4   2   9  119.63    3.72
   4   2   9  118.36    3.76
   4   2   9  119.01    2.11
   4   2  10    7.92    1.09
   4   2  10    8.62    1.15
   4   2  10    9.84    0.46
   4   2  11    7.42    0.29
   4   2  11    7.23    1.61
   4   2  11    7.68    1.17
   4   2  12    1.94    0.28
   4   2  12    1.31    0.81
   4   2  12    2.28    0.87
   4   2  13    5.10    1.88
   4   2  13    5.30    1.17
   4   2  14   -0.27    0.69
   4   2  14    0.76    0.66
   4   2  15    1.43    1.01
   4   2  15    1.68    1.05
   4   2  16    5.17    1.42
   4   2  16    4.30    2.31
   4   2  17    2.72    1.87
   4   2  17    1.38    1.27
   4   2  18    3.07    1.37
   4   2  18    1.21    2.22
   4   3 -15   -0.01    1.12
   4   3 -15    1.74    0.84
  -4  -3  15    1.05    0.65
   4   3 -14    0.00    1.44
   4   3 -14    0.01    0.66
  -4  -3  14    0.91    0.52
   4   3 -13    9.67    1.83
   4   3 -13   12.50    1.76
  -4  -3  13   11.49    1.03
   4   3 -12    5.16    2.02
   4   3 -12    5.02    0.91
  -4  -3  12    5.79    0.76
   4   3 -11    0.11    0.50
   4   3 -11    0.09    0.32
  -4  -3  11   -0.23    0.28
   4   3 -10    0.57    0.64
   4   3 -10    0.31    0.39
  -4  -3  10    0.38    0.36
   4   3  -9    0.36    0.24
   4   3  -9    0.29    0.41
  -4  -3   9   -0.33    0.23
   4   3  -8    2.81    0.48
   4   3  -8    3.16    0.82
  -4  -3   8    2.72    0.77
   4   3  -7    8.46    0.95
   4   3  -7   10.52    1.03
  -4  -3   7    9.43    0.68
   4   3  -6   10.63    0.64
   4   3  -6   12.69    1.02
  -4  -3   6   11.92    0.70
   4   3  -5   90.51    2.72
   4   3  -5   96.44    2.22
  -4  -3   5   93.76    2.65
   4   3  -4    4.18    0.62
   4   3  -4    4.31    0.43
  -4  -3   4    4.29    0.46
   4   3  -3   23.26    1.03
   4   3  -3   22.84    0.78
  -4  -3   3   22.53    0.87
   4   3  -2   62.00    1.76
   4   3  -2   62.03    1.50
  -4  -3   2   63.18    1.97
   4   3  -1   40.31    1.64
   4   3  -1   43.60    1.19
  -4  -3   1   43.00    1.32
   4   3   0   28.51    0.96
   4   3   0   31.31    1.02
  -4  -3   0   31.07    1.11
   4   3   1    0.29    0.21
   4   3   1    0.26    0.24
  -4  -3  -1    0.27    0.48
   4   3   2   27.47    1.05
  -4  -3  -2   25.97    1.14
   4   3   3    0.91    0.37
  -4  -3  -3    1.13    0.44
   4   3   4   15.32    0.90
   4   3   5   11.86    0.89
   4   3   6  142.21    3.82
   4   3   7   21.02    1.27
   4   3   8   17.23    1.21
   4   3   8   16.45    1.28
   4   3   8   16.77    0.29
   4   3   9   18.22    1.91
   4   3   9   18.38    0.27
   4   3   9   17.92    2.01
   4   3  10   31.69    1.92
   4   3  10   33.88    1.86
   4   3  11    3.44    0.91
   4   3  11    3.19    0.98
   4   3  12    0.37    0.48
   4   3  12   -0.22    0.46
   4   3  13   20.77    1.84
   4   3  13   22.52    2.77
   4   3  14    4.31    1.26
   4   3  14    3.19    1.21
   4   3  15    0.24    0.52
   4   3  15   -0.36    0.56
   4   3  16    0.44    0.73
   4   3  16   -0.50    1.19
   4   3  17    8.91    1.87
   4   3  17    8.49    1.90
   4   3  18    5.17    1.66
   4   3  18    4.31    1.69
   4   4 -15    0.00    1.39
   4   4 -15    0.90    0.94
  -4  -4  15    0.09    0.47
   4   4 -14   -0.01    1.13
   4   4 -14    0.00    0.77
  -4  -4  14    3.47    0.93
   4   4 -13    3.50    1.15
   4   4 -13    0.01    0.75
  -4  -4  13    3.03    0.93
   4   4 -12   20.69    2.12
   4   4 -12   20.26    1.41
  -4  -4  12   19.94    1.17
   4   4 -11    0.51    0.48
   4   4 -11    1.29    0.84
  -4  -4  11    0.63    0.41
   4   4 -10    0.40    0.79
   4   4 -10   -0.07    0.28
  -4  -4  10   -0.14    0.26
   4   4  -9    1.12    0.38
   4   4  -9    0.65    0.75
  -4  -4   9    0.61    0.38
   4   4  -8   16.64    1.49
   4   4  -8   16.86    0.81
  -4  -4   8   20.13    0.92
   4   4  -7   12.94    0.99
   4   4  -7   13.55    1.26
  -4  -4   7   14.01    0.76
   4   4  -6    0.09    0.24
   4   4  -6   -0.33    0.48
  -4  -4   6    0.71    0.27
   4   4  -5   19.64    0.77
   4   4  -5   21.13    1.77
  -4  -4   5   20.12    0.86
   4   4  -4    3.25    0.38
   4   4  -4    4.03    0.66
  -4  -4   4    3.49    0.67
   4   4  -3   11.29    0.56
   4   4  -3   11.54    0.86
  -4  -4   3   11.59    0.65
   4   4  -2   23.40    1.44
   4   4  -2   24.87    1.10
  -4  -4   2   24.68    0.96
   4   4  -1   48.22    1.45
   4   4  -1   46.15    1.53
  -4  -4   1   46.38    1.42
   4   4   0    8.71    0.59
   4   4   0    8.90    0.55
  -4  -4   0    8.76    0.97
   4   4   1    7.79    0.52
   4   4   1    8.54    0.60
  -4  -4  -1    8.06    0.68
   4   4   2   10.59    0.72
   4   4   2   10.51    0.69
  -4  -4  -2   10.08    0.78
   4   4   3   28.23    0.95
   4   4   3   27.45    1.17
  -4  -4  -3   26.62    1.24
   4   4   4    0.45    0.25
   4   4   4    0.99    0.40
   4   4   5   81.31    1.46
   4   4   5   81.09    2.48
   4   4   6   95.53    1.62
   4   4   6   90.66    3.37
   4   4   7   50.84    2.03
   4   4   7   50.65    0.69
   4   4   8    1.68    0.68
   4   4   8    1.06    1.00
   4   4   9   -0.01    0.34
   4   4   9   -0.02    0.32
   4   4  10   20.59    1.60
   4   4  10   21.07    1.57
   4   4  11    7.28    1.17
   4   4  11    6.73    1.93
   4   4  12    1.53    0.83
   4   4  12    0.65    0.82
   4   4  13    1.25    0.94
   4   4  14    8.76    1.66
   4   4  15    0.02    1.00
   4   4  15    1.29    0.94
   4   4  16   -0.14    1.73
   4   4  16    1.42    1.09
   4   4  17    0.53    0.85
   4   4  17   -0.16    0.89
   4   4  18    7.47    2.00
   4   4  18    8.88    2.02
   4   5 -14    0.00    0.71
   4   5 -14    2.44    1.15
  -4  -5  14    1.38    0.87
   4   5 -13    0.21    0.65
   4   5 -13    0.01    0.39
  -4  -5  13    0.08    0.50
   4   5 -12   15.92    1.98
   4   5 -12   14.62    1.77
  -4  -5  12   14.89    1.03
   4   5 -11   17.44    1.60
   4   5 -11   18.50    2.92
  -4  -5  11   17.25    1.01
   4   5 -10    2.29    1.03
   4   5 -10    1.84    0.81
  -4  -5  10    2.32    0.50
   4   5  -9    0.04    0.63
   4   5  -9    0.25    0.29
  -4  -5   9    0.32    0.44
   4   5  -8   38.40    3.07
   4   5  -8   35.72    1.17
  -4  -5   8   37.65    1.33
   4   5  -7   11.99    0.64
   4   5  -7   12.90    1.34
  -4  -5   7   13.80    1.04
   4   5  -6    1.05    0.71
   4   5  -6    1.89    0.31
  -4  -5   6    1.13    0.37
   4   5  -5   12.71    1.14
   4   5  -5   12.52    0.83
  -4  -5   5   11.88    0.67
   4   5  -4   98.72    2.18
   4   5  -4   97.20    3.01
  -4  -5   4   99.85    2.49
   4   5  -3   11.04    0.55
   4   5  -3   11.85    0.94
  -4  -5   3   11.86    0.67
   4   5  -2    8.15    0.49
   4   5  -2    8.42    0.76
  -4  -5   2    7.89    0.59
   4   5  -1   74.98    1.84
   4   5  -1   74.97    2.12
  -4  -5   1   74.41    2.48
   4   5   0   71.08    1.81
   4   5   0   69.49    1.89
  -4  -5   0   67.61    1.99
   4   5   1   42.77    1.68
   4   5   1   42.30    1.26
  -4  -5  -1   42.55    1.50
   4   5   2    5.53    0.45
   4   5   2    6.43    0.58
  -4  -5  -2    5.36    0.66
   4   5   3    0.27    0.20
   4   5   3    0.55    0.33
   4   5   4    0.03    0.20
   4   5   4    0.24    0.29
   4   5   5   29.24    0.80
   4   5   5   29.91    1.37
   4   5   6   31.87    1.54
   4   5   6   31.35    0.67
   4   5   7   66.51    2.46
   4   5   7   66.35    2.47
   4   5   8    7.71    1.02
   4   5   8    6.98    1.01
   4   5   9   11.02    1.27
   4   5   9   10.53    1.23
   4   5  10   19.16    1.62
   4   5  10   21.19    1.71
   4   5  11   43.66    2.43
   4   5  12    2.57    1.06
   4   5  13   -0.12    0.63
   4   5  14   -0.45    1.34
   4   5  15    0.04    0.65
   4   5  16    0.16    0.81
   4   5  17    0.68    0.99
   4   5  17   -0.02    1.02
   4   5  18    3.97    1.76
   4   6 -14   -0.14    0.84
   4   6 -13   -0.01    0.62
   4   6 -13    1.43    1.16
  -4  -6  13    1.50    0.52
   4   6 -12    0.01    0.59
   4   6 -12    3.01    1.13
  -4  -6  12    1.69    0.50
   4   6 -11   17.60    2.07
   4   6 -11   17.43    1.16
  -4  -6  11   17.18    1.02
   4   6 -10    0.23    0.69
   4   6 -10    0.31    0.32
  -4  -6  10   -0.12    0.45
   4   6  -9    2.23    0.99
   4   6  -9    1.61    0.43
  -4  -6   9    1.60    0.43
   4   6  -8   12.20    1.50
   4   6  -8   11.64    0.92
  -4  -6   8   11.50    1.05
   4   6  -7   14.32    0.63
   4   6  -7   14.46    1.53
  -4  -6   7   14.06    0.77
   4   6  -6    2.02    0.47
   4   6  -6    2.08    0.84
  -4  -6   6    1.90    0.41
   4   6  -5    1.29    0.43
   4   6  -5    1.84    0.70
  -4  -6   5    1.18    0.36
   4   6  -4   75.37    3.40
   4   6  -4   73.08    1.70
  -4  -6   4   75.49    2.04
   4   6  -3   12.25    1.06
   4   6  -3   12.76    0.58
  -4  -6   3   14.08    0.75
   4   6  -2   21.51    1.19
   4   6  -2   20.59    0.73
  -4  -6   2   21.90    0.95
   4   6  -1   52.62    1.77
   4   6  -1   52.81    1.43
  -4  -6   1   50.59    1.60
   4   6   0   97.86    2.57
   4   6   0  100.25    2.40
  -4  -6   0   97.82    2.68
   4   6   1   16.31    0.81
   4   6   1   17.38    0.87
  -4  -6  -1   15.77    0.93
   4   6   2   41.45    1.24
   4   6   2   40.46    1.43
   4   6   3    0.00    0.14
   4   6   3    0.16    0.34
   4   6   4   99.41    2.10
   4   6   4   98.17    3.42
   4   6   5   16.52    0.52
   4   6   5   16.22    1.09
   4   6   6    2.48    0.27
   4   6   6    2.46    0.70
   4   6   6    2.63    0.70
   4   6   7   71.76    3.40
   4   6   7   71.10    3.42
   4   6   8   43.89    2.14
   4   6   8   43.94    2.13
   4   6   9   23.07    1.74
   4   6   9   22.39    1.68
   4   6  10    9.30    2.11
   4   6  11   29.02    2.16
   4   6  12    4.82    1.26
   4   6  13    3.22    1.28
   4   6  14   -0.06    0.64
   4   6  15    0.04    0.65
   4   6  16   -0.01    0.52
   4   6  17   -0.04    0.74
   4   7 -13    1.34    2.00
   4   7 -12    0.00    0.28
   4   7 -12   -0.15    0.61
   4   7 -11    9.89    0.90
   4   7 -11   12.40    1.92
  -4  -7  11   10.77    0.83
   4   7 -10    0.97    0.94
   4   7 -10    0.59    0.40
  -4  -7  10    0.68    0.37
   4   7  -9    1.96    1.77
   4   7  -9    2.46    0.68
  -4  -7   9    2.40    0.73
   4   7  -8    1.65    0.91
   4   7  -8    1.26    0.33
  -4  -7   8    1.15    0.38
   4   7  -7    2.14    0.42
   4   7  -7    3.20    0.87
  -4  -7   7    0.00    0.38
   4   7  -6   12.25    0.53
   4   7  -6   12.13    1.42
  -4  -7   6   11.15    1.24
  -4  -7   6   13.16    1.02
   4   7  -5    1.44    0.27
   4   7  -5    2.51    0.77
  -4  -7   5    1.74    0.59
  -4  -7   5    1.64    0.65
   4   7  -4   11.41    1.77
   4   7  -4   10.69    0.52
  -4  -7   4   10.87    0.99
  -4  -7   4   10.74    0.99
   4   7  -3   93.26    3.76
   4   7  -3   87.09    2.22
  -4  -7   3   88.81    2.66
  -4  -7   3   89.83    2.80
   4   7  -2   11.17    1.45
   4   7  -2    9.87    0.76
  -4  -7   2    9.93    0.83
  -4  -7   2    9.87    1.00
   4   7  -1   14.82    1.46
   4   7  -1   13.60    0.93
  -4  -7   1   13.00    1.17
  -4  -7   1   13.61    0.84
   4   7   0  120.03    3.71
   4   7   0  115.90    3.14
  -4  -7   0  116.09    2.87
   4   7   1   34.83    1.28
   4   7   1   34.14    1.30
  -4  -7  -1   33.87    1.14
   4   7   2    3.98    0.49
   4   7   2    3.32    0.81
  -4  -7  -2    3.39    0.42
   4   7   3   19.76    0.81
   4   7   3   18.75    1.09
   4   7   4   33.28    0.99
   4   7   4   31.31    1.46
   4   7   5    9.09    0.44
   4   7   5    9.47    0.94
   4   7   5    8.74    1.37
   4   7   6    8.27    1.46
   4   7   6    7.65    0.98
   4   7   7   -0.33    0.43
   4   7   7    0.08    0.43
   4   7   8   46.06    2.25
   4   7   8   45.87    2.25
   4   7   9   11.07    1.40
   4   7   9   11.91    1.40
   4   7  10   31.36    2.14
   4   7  11    1.02    1.39
   4   7  12    2.24    1.15
   4   7  13   -0.04    0.92
   4   7  14    0.11    0.73
   4   7  15   -0.12    1.27
   4   7  16    0.04    0.73
   4   7  17    0.04    1.21
   4   8 -12    2.04    1.38
   4   8 -11   11.62    2.06
   4   8 -10   14.18    0.82
   4   8 -10   14.52    2.00
  -4  -8  10   11.19    0.81
   4   8  -9    0.05    0.30
   4   8  -9    0.11    0.56
  -4  -8   9    0.00    0.32
   4   8  -8    0.00    0.57
   4   8  -8    0.10    0.19
  -4  -8   8    0.00    0.33
   4   8  -7    3.33    0.34
   4   8  -7    3.93    1.13
  -4  -8   7    3.14    0.96
   4   8  -6    0.54    0.19
   4   8  -6    1.33    0.70
  -4  -8   6    1.26    0.58
  -4  -8   6    0.00    0.30
   4   8  -5    0.18    0.17
   4   8  -5   -0.68    0.91
  -4  -8   5    0.30    0.25
  -4  -8   5    0.67    0.46
   4   8  -4    6.05    1.60
   4   8  -4    5.83    0.39
  -4  -8   4    6.16    0.82
  -4  -8   4    5.44    0.87
   4   8  -3   54.77    1.60
   4   8  -3   53.01    3.04
  -4  -8   3   51.80    2.58
  -4  -8   3   56.38    2.13
   4   8  -2   14.80    1.80
   4   8  -2   16.69    0.89
  -4  -8   2   16.89    1.54
   4   8  -1    4.63    0.45
   4   8  -1    4.31    0.77
  -4  -8   1    4.50    0.64
   4   8   0    3.95    0.71
   4   8   0    4.90    0.77
  -4  -8   0    4.01    0.60
   4   8   1   80.96    2.41
   4   8   1   77.09    2.22
  -4  -8  -1   79.07    2.59
   4   8   2   14.51    1.35
   4   8   2   14.89    1.24
  -4  -8  -2   15.95    1.09
   4   8   3   12.50    0.75
   4   8   3   11.98    0.96
  -4  -8  -3   12.95    0.66
   4   8   4   22.26    0.87
   4   8   4   21.24    1.28
   4   8   4   19.95    1.26
  -4  -8  -4   21.64    0.77
   4   8   5    1.87    1.03
   4   8   5    2.02    0.98
   4   8   6   40.79    1.99
   4   8   6   40.59    1.92
   4   8   7   11.68    1.24
   4   8   7   12.09    1.25
   4   8   8   20.38    1.65
   4   8   8   20.03    1.61
   4   8   9    4.90    1.17
   4   8   9    5.47    1.13
   4   8  10   12.56    1.59
   4   8  11    0.46    0.79
   4   8  12   17.46    2.06
   4   8  13   11.47    1.95
   4   8  14   -0.13    0.80
   4   8  15   -0.11    0.80
   4   8  16    0.04    0.76
   4   8  17   -0.03    0.74
   4   9 -12    1.19    2.12
   4   9 -11    0.33    0.97
   4   9 -10   37.64    3.05
   4   9  -9    0.65    1.00
   4   9  -8   -0.30    1.00
   4   9  -8    1.43    0.27
  -4  -9   8    2.25    0.83
  -4  -9   8    0.00    0.30
   4   9  -7    4.32    2.04
   4   9  -7    4.00    0.34
  -4  -9   7    5.21    1.08
   4   9  -6    2.77    0.27
   4   9  -6    3.08    1.66
  -4  -9   6    4.29    0.89
  -4  -9   6    0.00    0.62
   4   9  -5    4.33    0.45
   4   9  -5    5.33    1.15
  -4  -9   5    3.53    1.45
  -4  -9   5    4.83    0.47
   4   9  -4    7.26    0.39
   4   9  -4    6.60    1.20
  -4  -9   4    5.83    0.97
   4   9  -3    3.56    0.34
   4   9  -3    2.05    0.92
  -4  -9   3    2.77    0.74
   4   9  -2   16.85    0.93
   4   9  -2   19.20    2.01
  -4  -9   2   17.05    1.14
   4   9  -1   -0.16    0.42
   4   9  -1   -0.05    0.21
  -4  -9   1   -0.27    0.33
   4   9   0    6.24    0.89
   4   9   0    6.97    0.89
  -4  -9   0    6.80    0.72
   4   9   1   33.29    1.33
   4   9   1   32.84    1.52
  -4  -9  -1   33.56    1.31
   4   9   2   20.78    1.13
   4   9   2   20.49    1.16
   4   9   2   21.61    1.58
  -4  -9  -2   22.31    0.99
   4   9   3    7.26    1.05
   4   9   3    6.93    0.88
   4   9   3    7.55    0.82
  -4  -9  -3    8.09    0.61
   4   9   4   -0.25    0.37
   4   9   4    0.67    0.36
  -4  -9  -4   -0.05    0.33
   4   9   5    3.62    1.16
   4   9   5    2.35    0.74
  -4  -9  -5    2.58    0.36
   4   9   6    3.10    0.85
   4   9   6    2.86    0.85
   4   9   7   39.10    2.16
   4   9   7   41.30    2.17
   4   9   8    9.73    1.34
   4   9   8    9.67    1.32
   4   9   9   26.37    2.02
   4   9   9   25.73    1.96
   4   9  10    0.78    0.84
   4   9  11    4.50    1.37
   4   9  12    8.76    1.75
   4   9  13   21.37    2.46
   4   9  14    4.51    2.56
   4   9  15    0.08    0.81
   4   9  16   -0.07    1.34
   4  10 -11    3.08    1.65
   4  10 -10    3.25    1.57
   4  10  -9   21.08    3.88
  -4 -10   9   23.62    2.30
   4  10  -8   -0.20    1.27
  -4 -10   8    3.42    1.10
   4  10  -7   -0.38    0.46
   4  10  -7    0.03    0.12
  -4 -10   7   -0.16    0.39
   4  10  -6    1.56    1.03
   4  10  -6    1.38    0.28
  -4 -10   6    2.19    1.30
   4  10  -5   19.61    0.68
   4  10  -5   19.60    1.92
  -4 -10   5   18.28    1.53
   4  10  -4    0.04    0.12
   4  10  -4    1.06    0.51
  -4 -10   4   -0.22    0.40
   4  10  -3    0.59    0.21
   4  10  -3    0.81    0.68
  -4 -10   3    0.20    0.54
   4  10  -2   17.84    1.50
   4  10  -2   16.87    0.88
  -4 -10   2   16.97    1.20
   4  10  -1    1.93    1.16
   4  10  -1    1.80    0.44
   4  10  -1    1.64    0.57
  -4 -10   1    1.62    0.59
   4  10   0   20.48    1.39
   4  10   0   19.38    1.05
   4  10   0   19.70    1.34
  -4 -10   0   19.97    1.65
   4  10   1    7.71    0.96
   4  10   1    9.14    1.21
   4  10   1    8.42    0.76
  -4 -10  -1    8.67    1.18
   4  10   2   52.21    1.98
   4  10   2   46.81    1.86
   4  10   2   50.37    2.43
  -4 -10  -2   51.76    2.20
   4  10   3    6.43    0.85
   4  10   3    6.94    0.84
  -4 -10  -3    5.92    0.64
   4  10   4   -0.08    0.30
   4  10   4   -0.03    0.29
  -4 -10  -4    0.08    0.18
   4  10   5    0.70    0.65
   4  10   5    1.18    0.93
  -4 -10  -5    1.06    0.50
   4  10   6   -0.31    0.50
   4  10   6   -0.10    0.48
  -4 -10  -6    0.29    0.20
   4  10   7    1.26    1.23
   4  10   7    1.47    0.80
   4  10   8    0.18    0.56
   4  10   8    0.03    0.89
   4  10   9    2.07    0.94
   4  10   9    1.02    0.94
   4  10  10   23.87    2.16
   4  10  11    1.75    1.15
   4  10  12    1.02    1.09
   4  10  13   11.54    3.29
   4  10  14    0.37    1.01
   4  10  15    1.49    1.46
   4  10  16    1.30    1.46
   4  11 -10    0.68    0.92
  -4 -11  10   -0.28    0.82
   4  11  -9   -0.31    1.69
  -4 -11   9    7.74    1.52
   4  11  -8    0.29    1.67
  -4 -11   8    7.79    1.45
   4  11  -7   -0.05    1.38
  -4 -11   7    4.82    1.18
   4  11  -6   -0.04    1.03
  -4 -11   6    1.61    0.83
   4  11  -5    3.17    1.21
   4  11  -5    3.43    0.25
   4  11  -5    1.26    0.34
  -4 -11   5    2.88    0.94
   4  11  -4    0.70    0.71
   4  11  -4    0.33    0.20
   4  11  -4    0.21    0.19
  -4 -11   4    0.77    0.57
   4  11  -3    1.06    0.78
   4  11  -3    0.60    0.29
   4  11  -3    0.97    0.32
  -4 -11   3    0.62    0.62
   4  11  -2    4.60    0.53
   4  11  -2    5.12    0.40
   4  11  -2    4.58    1.12
  -4 -11   2    4.69    1.31
   4  11  -1    5.01    1.58
   4  11  -1    3.72    0.87
   4  11  -1    5.68    0.71
  -4 -11   1    4.55    1.28
   4  11   0    6.50    1.02
   4  11   0    4.54    0.84
   4  11   0    3.64    0.93
  -4 -11   0    4.99    0.78
   4  11   1    3.25    0.81
   4  11   1    2.38    0.59
   4  11   1    2.65    0.58
  -4 -11  -1    2.71    0.65
   4  11   2   27.23    1.45
   4  11   2   26.78    1.84
  -4 -11  -2   27.68    1.32
   4  11   3   34.80    1.76
   4  11   3   38.21    2.37
  -4 -11  -3   37.87    1.96
   4  11   4    1.25    0.63
   4  11   4    0.62    0.95
  -4 -11  -4    1.12    0.64
   4  11   5    7.53    1.04
   4  11   5    6.98    1.02
  -4 -11  -5    5.91    0.60
   4  11   6   44.77    2.28
   4  11   6   40.62    2.21
  -4 -11  -6   41.59    1.64
   4  11   7   29.48    2.82
   4  11   7   26.97    1.98
  -4 -11  -7   27.88    0.94
   4  11   8    5.91    1.26
   4  11   8    5.49    1.25
   4  11   9    5.79    1.35
   4  11   9    5.69    2.09
   4  11  10   16.68    1.94
   4  11  10   14.57    1.98
   4  11  11    0.09    0.68
   4  11  12    0.67    1.66
   4  11  13    2.58    1.44
   4  11  14    8.53    2.12
   4  11  15    1.31    1.42
   4  12  -9   -0.27    0.82
  -4 -12   9    0.10    0.71
   4  12  -8   -0.14    0.97
  -4 -12   8   -0.31    0.83
   4  12  -7   -0.16    0.71
  -4 -12   7    0.12    0.88
   4  12  -6    0.23    0.91
  -4 -12   6    0.37    0.70
   4  12  -5   -0.36    1.12
  -4 -12   5    2.18    0.88
   4  12  -4    0.13    1.29
   4  12  -4    3.01    0.22
  -4 -12   4    3.99    0.99
   4  12  -3    0.31    0.64
   4  12  -3    0.12    0.19
   4  12  -3    0.09    0.17
  -4 -12   3    0.53    0.75
   4  12  -2    0.61    0.82
   4  12  -2    0.62    0.30
   4  12  -2    0.69    0.37
  -4 -12   2    0.85    0.95
   4  12  -1    1.87    0.35
   4  12  -1    1.28    0.88
   4  12  -1    0.69    0.42
  -4 -12   1    2.10    0.70
   4  12   0    0.74    0.41
   4  12   0    0.82    0.38
  -4 -12   0    0.97    0.57
   4  12   1    3.92    0.72
   4  12   1    6.48    0.75
  -4 -12  -1    6.12    0.83
   4  12   2    0.26    0.47
   4  12   2    0.24    0.45
  -4 -12  -2    1.23    0.47
   4  12   3   26.73    2.19
   4  12   3   28.18    1.57
  -4 -12  -3   28.66    1.38
   4  12   4    0.65    0.89
   4  12   4    0.45    0.59
  -4 -12  -4    0.74    0.42
   4  12   5   -0.08    0.50
   4  12   5   -0.18    0.49
  -4 -12  -5   -0.23    0.46
   4  12   6   13.37    1.43
   4  12   6   12.01    1.41
  -4 -12  -6   11.51    0.75
   4  12   7   23.26    1.94
   4  12   7   24.42    2.76
  -4 -12  -7   22.69    1.26
   4  12   8    0.18    0.50
   4  12   8    0.09    0.50
  -4 -12  -8   -0.08    0.16
   4  12   9   -0.01    0.64
   4  12   9    0.26    0.64
   4  12  10    2.83    1.12
   4  12  10   -0.01    1.12
   4  12  11    4.41    1.27
   4  12  11    0.01    1.35
   4  12  12    4.63    1.62
   4  12  13   -0.17    0.88
   4  12  14   11.40    2.32
   4  13  -7    0.43    0.81
  -4 -13   7   -0.51    1.05
   4  13  -6    0.07    0.99
  -4 -13   6    0.46    0.78
   4  13  -5   -0.13    1.16
  -4 -13   5    1.75    0.91
  -4 -13   4   10.90    1.49
  -4 -13   3    0.39    1.00
   4  13  -2   -0.09    0.14
   4  13  -2    0.04    0.27
  -4 -13   2   -0.22    0.45
   4  13  -1    6.92    0.65
   4  13  -1    8.29    0.80
   4  13   0    2.55    0.89
   4  13   0    3.84    0.55
  -4 -13   0    2.64    0.85
   4  13   1    0.43    0.68
   4  13   1    0.59    0.65
  -4 -13  -1    0.51    0.54
   4  13   2   -0.01    0.48
   4  13   2    0.14    0.30
  -4 -13  -2   -0.06    0.32
   4  13   3   17.72    1.33
   4  13   3   16.27    1.92
  -4 -13  -3   17.73    1.23
   4  13   4   18.31    2.09
   4  13   4   19.16    1.53
  -4 -13  -4   18.38    1.18
   4  13   5   -0.32    0.58
   4  13   5   -0.04    0.57
  -4 -13  -5   -0.57    0.59
   4  13   6    0.41    0.71
   4  13   6    0.34    1.08
  -4 -13  -6    0.65    0.39
   4  13   7    7.95    1.42
   4  13   7    7.82    1.37
  -4 -13  -7    7.32    0.66
   4  13   8    1.26    0.88
   4  13   8    0.42    0.88
  -4 -13  -8    0.75    0.33
   4  13   9    3.27    1.29
   4  13   9    3.66    1.93
   4  13  10    1.43    1.07
   4  13  10    0.65    1.01
   4  13  11    0.01    1.37
   4  13  11    3.73    1.32
   4  13  12    0.04    0.55
   4  13  12   -0.12    0.86
   4  13  13    3.16    1.59
  -4 -14   6    0.49    0.91
  -4 -14   5    0.64    0.90
  -4 -14   4    5.17    1.32
  -4 -14   3   -0.20    0.97
  -4 -14   2   -0.06    0.47
  -4 -14   1    0.06    0.45
   4  14   0   17.52    0.93
   4  14   0   14.19    0.94
  -4 -14   0   16.05    1.43
   4  14   1    0.05    0.32
   4  14   1    0.15    0.31
  -4 -14  -1    0.00    0.42
   4  14   2    2.18    1.01
   4  14   2    1.78    0.96
  -4 -14  -2    1.58    0.72
   4  14   3    0.06    0.76
   4  14   3    0.39    0.53
  -4 -14  -3    0.48    0.50
   4  14   4   11.75    1.86
   4  14   4   12.80    1.37
  -4 -14  -4   12.21    1.10
   4  14   5    0.22    0.74
   4  14   5    0.13    0.78
  -4 -14  -5    0.07    0.35
   4  14   6    2.49    0.91
   4  14   6    1.82    0.99
  -4 -14  -6    1.97    0.89
   4  14   7    3.67    1.10
   4  14   7    2.74    1.03
  -4 -14  -7    1.77    0.55
   4  14   8    3.03    1.21
   4  14   8    1.86    1.15
  -4 -14  -8    2.52    0.50
   4  14   9    1.39    1.77
   4  14   9    1.68    1.09
   4  14  10    0.23    0.46
   4  14  10   -0.51    0.69
   4  14  11    3.06    1.61
   4  14  11    4.50    1.50
   4  14  12    1.16    1.34
   4  14  12    1.15    1.23
  -4 -15   4   -0.04    0.58
  -4 -15   3    6.13    2.14
  -4 -15   2    0.00    0.36
  -4 -15   1    0.03    0.43
  -4 -15   0   -0.02    0.39
   4  15   1    3.25    0.92
   4  15   1    2.52    0.60
  -4 -15  -1    0.01    0.86
   4  15   2    0.72    0.52
   4  15   2    0.44    0.47
  -4 -15  -2    0.05    0.58
   4  15   3    2.97    0.84
   4  15   3    2.14    1.17
  -4 -15  -3    2.44    0.82
   4  15   4    2.07    0.87
   4  15   4    1.07    1.19
  -4 -15  -4    2.11    0.73
   4  15   5    7.79    1.97
   4  15   5    9.55    1.41
  -4 -15  -5    8.71    1.05
   4  15   6   -0.07    0.97
   4  15   6   -0.65    0.71
  -4 -15  -6   -0.09    0.67
   4  15   7    0.42    0.98
   4  15   7    0.63    0.69
  -4 -15  -7    0.05    0.37
   4  15   8    1.45    1.17
   4  15   8    2.14    1.06
   4  15   9   -0.81    0.87
   4  15   9    0.14    0.76
   4  15  10    1.31    1.51
   4  15  10   -0.96    0.89
  -4 -16   1   -0.03    0.48
  -4 -16   0   -0.02    0.42
  -4 -16  -1   -0.03    0.44
  -4 -16  -2    0.02    0.39
   4  16   3    3.32    0.89
   4  16   3    3.17    0.75
  -4 -16  -3    0.05    0.90
   4  16   4    0.29    1.03
   4  16   4    0.19    0.79
  -4 -16  -4    1.77    0.68
   4  16   5   15.40    2.35
   4  16   5   17.49    2.63
  -4 -16  -5   13.25    2.00
   4  16   6    2.88    1.07
   4  16   6    1.21    0.95
  -4 -16  -6    1.45    1.07
   4  16   7    0.16    0.74
   4  16   7   -0.54    0.68
   5 -14  -6    1.99    1.27
  -5  14   6    0.26    0.81
   5 -14  -5    0.71    0.68
  -5  14   5   -0.05    0.61
   5 -14  -4    5.20    1.07
  -5  14   4    0.49    0.92
   5 -14  -3    0.05    0.80
  -5  14   3    1.81    0.70
   5 -14  -2    1.31    0.81
  -5  14   2    1.63    0.75
   5 -14  -1    6.50    1.15
  -5  14   1    8.67    1.11
   5 -14   0    3.56    1.45
  -5  14   0    5.05    0.97
   5 -14   1    0.65    0.81
  -5  14  -1    0.38    0.54
   5 -14   2   -0.14    0.89
   5 -14   3    9.73    2.19
   5 -14   4    2.32    2.39
   5 -14   5    1.77    1.48
   5 -13  -8    3.30    1.10
  -5  13   8    0.13    1.08
   5 -13  -7    6.43    1.21
  -5  13   7    0.55    1.17
   5 -13  -6    1.01    0.76
  -5  13   6   -0.13    1.12
   5 -13  -5    0.37    0.88
  -5  13   5    0.23    0.57
   5 -13  -4    6.14    1.23
  -5  13   4    7.84    1.09
   5 -13  -3    2.14    0.88
  -5  13   3    2.91    0.81
   5 -13  -2    1.34    0.71
  -5  13   2    1.25    0.68
   5 -13  -1    0.11    0.46
  -5  13   1    0.39    0.72
   5 -13   0    0.92    1.06
  -5  13   0    2.85    1.13
   5 -13   1    1.76    0.90
  -5  13  -1    1.53    0.67
   5 -13   2   -0.49    0.54
  -5  13  -2    0.03    0.41
   5 -13   3    0.47    0.51
  -5  13  -3    0.00    0.41
   5 -13   4   19.70    2.63
   5 -13   5    0.83    1.17
   5 -13   6    2.22    1.45
   5 -13   7    2.04    1.49
   5 -12  -9    0.53    0.78
  -5  12   9    0.00    0.75
   5 -12  -8   -0.34    0.70
  -5  12   8    0.00    1.07
   5 -12  -7    8.75    2.10
  -5  12   7   10.94    1.43
   5 -12  -6    0.39    0.61
  -5  12   6    0.26    0.61
   5 -12  -5    2.23    0.79
  -5  12   5    0.98    1.23
   5 -12  -4    1.29    0.99
  -5  12   4    1.04    0.67
   5 -12  -3    4.21    0.92
  -5  12   3    5.08    0.89
   5 -12  -2    1.84    0.72
  -5  12   2    2.31    0.70
   5 -12  -1    2.17    0.68
  -5  12   1    2.33    0.70
   5 -12   0    0.62    0.70
  -5  12   0    0.54    0.52
   5 -12   1    6.74    0.78
  -5  12  -1    7.63    0.91
   5 -12   2    5.41    0.69
  -5  12  -2    5.03    0.84
   5 -12   3    0.98    0.38
  -5  12  -3   -0.04    0.51
   5 -12   4    3.21    0.48
  -5  12  -4    0.02    0.65
   5 -12   5    6.16    1.49
  -5  12  -5    2.20    0.67
   5 -12   6    9.95    1.96
   5 -12   7    3.14    1.52
   5 -12   8   10.27    2.13
   5 -11 -11    0.41    0.83
  -5  11  11    0.00    0.79
   5 -11 -10   13.19    1.89
  -5  11  10   11.07    1.79
   5 -11  -9    2.06    0.95
  -5  11   9    0.00    0.91
   5 -11  -8    1.23    0.78
  -5  11   8   -0.01    0.77
   5 -11  -7    7.79    1.31
  -5  11   7    9.33    1.31
   5 -11  -6    5.01    1.57
  -5  11   6    5.90    1.07
   5 -11  -5    0.99    0.67
  -5  11   5    1.54    0.70
   5 -11  -4   -0.21    0.34
  -5  11   4    0.14    0.35
   5 -11  -3    8.15    1.37
  -5  11   3   10.59    1.52
   5 -11  -2    6.17    0.84
  -5  11   2    5.38    0.85
   5 -11  -1    0.07    0.41
  -5  11   1    0.54    0.43
   5 -11   0    0.32    0.68
  -5  11   0    1.13    0.52
   5 -11   1    1.09    0.44
  -5  11  -1    0.80    0.53
   5 -11   2   10.50    0.79
  -5  11  -2   10.03    1.37
   5 -11   3    0.26    0.40
  -5  11  -3    0.01    0.36
   5 -11   4    1.12    0.35
  -5  11  -4   -0.02    0.83
   5 -11   5   12.87    0.72
   5 -11   5   16.81    2.06
  -5  11  -5   13.14    1.51
   5 -11   6   -0.14    0.16
   5 -11   6    1.30    0.59
  -5  11  -6    0.05    0.40
   5 -11   7    1.61    1.20
   5 -11   8    5.81    2.51
   5 -11   9    2.10    1.33
   5 -10 -12    1.87    1.60
  -5  10  12    0.00    0.97
   5 -10 -11   -0.74    0.87
  -5  10  11    0.00    0.83
   5 -10 -10    7.04    1.84
  -5  10  10    0.00    1.12
   5 -10  -9    1.27    0.79
  -5  10   9    0.00    0.79
   5 -10  -8    1.56    0.77
  -5  10   8    0.00    0.74
   5 -10  -7    2.42    0.90
  -5  10   7    3.27    1.39
   5 -10  -6    4.99    1.00
  -5  10   6    5.98    1.05
   5 -10  -5   12.69    1.61
  -5  10   5   10.91    1.18
   5 -10  -4    8.58    0.95
  -5  10   4    8.89    1.02
   5 -10  -3    6.50    0.81
  -5  10   3    6.64    0.87
   5 -10  -2   14.06    0.93
  -5  10   2   15.87    1.11
   5 -10  -1   -0.69    0.35
  -5  10   1    0.03    0.44
   5 -10   0    5.30    0.66
  -5  10   0    6.14    0.78
   5 -10   1    1.45    0.44
  -5  10  -1    1.21    0.55
   5 -10   2   17.55    1.25
  -5  10  -2   16.40    1.09
   5 -10   3    1.15    0.36
  -5  10  -3    0.01    0.80
   5 -10   4    0.53    0.27
  -5  10  -4    0.00    0.41
   5 -10   5   21.15    1.15
  -5  10  -5   21.01    1.28
   5 -10   6    7.42    1.46
   5 -10   6    5.50    0.47
  -5  10  -6    4.57    0.77
   5 -10   7    1.16    1.52
   5 -10   7    0.77    0.26
   5 -10   8    0.16    0.30
   5 -10   8    0.58    0.76
   5 -10   9    5.20    1.53
   5 -10  10    0.16    1.20
   5  -9 -12    0.20    0.74
  -5   9  12   -0.01    0.66
   5  -9 -11    0.42    0.76
  -5   9  11    0.00    0.69
   5  -9 -10    4.49    1.13
  -5   9  10    0.00    1.07
   5  -9  -9    8.57    1.43
  -5   9   9    9.18    1.37
   5  -9  -8   -0.04    0.38
  -5   9   8    0.00    0.38
   5  -9  -7    0.27    0.53
  -5   9   7    0.24    0.54
   5  -9  -6   -0.13    0.25
  -5   9   6    0.17    0.28
   5  -9  -5   38.55    1.78
  -5   9   5   37.94    1.84
   5  -9  -4    0.25    0.40
  -5   9   4    0.67    0.73
   5  -9  -3    3.02    0.60
  -5   9   3    2.74    0.68
   5  -9  -2   21.41    1.07
  -5   9   2   22.72    1.26
   5  -9  -1    2.88    0.51
  -5   9   1    2.65    0.63
   5  -9   0    5.08    0.53
  -5   9   0    3.95    0.72
   5  -9   1    4.22    0.49
  -5   9  -1    3.87    0.68
   5  -9   2   12.83    0.69
  -5   9  -2   13.38    0.97
   5  -9   3   10.90    0.67
  -5   9  -3   10.11    1.32
   5  -9   4    0.22    0.23
  -5   9  -4    0.00    0.35
   5  -9   5    2.73    0.37
  -5   9  -5   -0.02    0.60
   5  -9   6   28.03    0.97
  -5   9  -6   26.50    1.96
   5  -9   7    0.38    0.24
   5  -9   7    0.00    0.77
   5  -9   8   -0.04    0.43
   5  -9   8    0.02    0.14
   5  -9   9    4.70    2.04
   5  -9   9    4.30    0.43
   5  -9  10    7.70    1.59
   5  -9  11    0.20    0.74
   5  -8 -13    1.05    1.01
  -5   8  13   -0.03    0.90
   5  -8 -12    6.47    1.44
  -5   8  12    0.00    1.25
   5  -8 -11    0.83    0.82
  -5   8  11    0.00    0.74
   5  -8 -10    2.63    0.96
  -5   8  10    0.00    0.89
   5  -8  -9   11.33    1.41
  -5   8   9   10.18    1.40
   5  -8  -8    5.59    1.05
  -5   8   8    4.09    1.05
   5  -8  -7    0.76    0.50
  -5   8   7   -0.20    0.52
   5  -8  -6    1.34    0.68
  -5   8   6    2.30    0.72
   5  -8  -5   23.76    1.31
  -5   8   5   23.10    1.43
   5  -8  -4    1.14    0.50
  -5   8   4    1.15    0.87
   5  -8  -3    2.20    0.54
  -5   8   3    2.61    0.62
   5  -8  -2   35.81    1.78
  -5   8   2   31.51    1.44
   5  -8  -1   57.52    1.68
  -5   8   1   44.75    1.78
   5  -8   0   11.04    0.71
  -5   8   0   10.60    1.33
   5  -8   1   17.94    0.82
  -5   8  -1   16.93    1.03
   5  -8   2    4.29    0.45
  -5   8  -2    3.35    0.63
   5  -8   3    8.78    0.80
  -5   8  -3    6.53    1.17
   5  -8   4    4.83    0.42
  -5   8  -4    0.03    0.65
   5  -8   5    0.67    0.26
  -5   8  -5    0.00    0.71
   5  -8   6   19.62    1.04
  -5   8  -6   17.03    1.64
   5  -8   7   26.07    2.05
   5  -8   7   23.71    0.85
  -5   8  -7   24.19    1.31
   5  -8   8    8.44    1.41
   5  -8   8    6.89    0.50
   5  -8   9    0.01    0.43
   5  -8   9    0.02    0.15
   5  -8  10    5.54    1.25
   5  -8  10    7.04    0.51
   5  -8  10    7.40    1.39
   5  -8  11    0.52    0.68
   5  -8  11    0.83    0.41
   5  -8  11    0.00    0.24
   5  -7 -13    0.00    0.73
  -5   7  13    0.17    0.65
   5  -7 -12   12.30    2.74
  -5   7  12   10.81    1.68
   5  -7 -11    0.94    0.78
  -5   7  11   -0.06    0.73
   5  -7 -10   -0.61    0.94
  -5   7  10    0.00    0.58
   5  -7  -9    9.14    1.29
  -5   7   9    6.87    1.22
   5  -7  -8    1.91    0.78
  -5   7   8    1.92    0.77
   5  -7  -7    8.40    1.04
  -5   7   7    8.16    1.06
   5  -7  -6    2.15    0.63
  -5   7   6    2.02    0.71
   5  -7  -5    1.30    0.57
  -5   7   5    1.86    0.62
   5  -7  -4   22.61    1.19
  -5   7   4   21.79    1.81
   5  -7  -3    0.39    0.33
  -5   7   3    0.08    0.39
   5  -7  -2    0.17    0.27
  -5   7   2   -0.03    0.31
   5  -7  -1   66.85    1.89
  -5   7   1   68.13    2.18
   5  -7   0   36.33    1.17
  -5   7   0   28.33    1.35
   5  -7   1    9.60    0.62
  -5   7  -1    8.40    0.80
   5  -7   2    0.11    0.21
  -5   7  -2    0.07    0.29
   5  -7   3   15.34    0.71
  -5   7  -3   14.22    1.39
   5  -7   4    1.12    0.43
  -5   7  -4    0.00    0.42
   5  -7   5    0.57    0.27
  -5   7  -5   -0.01    0.67
   5  -7   6    0.59    0.28
  -5   7  -6    0.88    0.47
   5  -7   7   59.96    1.59
  -5   7  -7   54.65    2.12
   5  -7   8    4.88    0.99
   5  -7   8    1.34    0.61
   5  -7   9    4.39    1.12
   5  -7   9    4.40    0.46
   5  -7  10    0.01    0.65
   5  -7  10    3.24    0.42
   5  -7  10    2.62    0.98
   5  -7  11    0.02    0.70
   5  -7  11    0.32    0.28
   5  -7  11    0.25    1.00
   5  -7  12    0.92    0.56
   5  -7  12   -0.02    0.53
   5  -7  12    1.30    0.77
   5  -7  13   -0.02    0.35
   5  -7  13   -0.06    0.25
   5  -6 -14    0.19    0.77
   5  -6 -14    0.23    0.66
  -5   6  14   -0.18    0.55
   5  -6 -13   -0.02    0.75
   5  -6 -13    1.96    0.98
  -5   6  13    0.20    0.84
   5  -6 -12    5.74    1.21
  -5   6  12    0.09    1.12
   5  -6 -11    0.84    0.75
  -5   6  11    0.03    0.68
   5  -6 -10   -0.14    0.47
  -5   6  10    0.23    0.46
   5  -6  -9    2.34    1.35
  -5   6   9    2.19    0.86
   5  -6  -8   22.21    1.56
  -5   6   8   21.41    1.53
   5  -6  -7    7.14    0.94
  -5   6   7    5.22    0.93
   5  -6  -6    6.17    0.84
  -5   6   6    5.81    0.91
   5  -6  -5    9.73    0.90
  -5   6   5    9.70    0.98
   5  -6  -4   58.91    1.92
  -5   6   4   62.22    2.76
   5  -6  -3    7.38    0.70
  -5   6   3    6.72    0.78
   5  -6  -2   21.29    0.99
  -5   6   2   20.31    1.13
   5  -6  -1    0.06    0.24
  -5   6   1   -0.32    0.29
   5  -6   0   31.40    1.47
  -5   6   0   31.03    1.32
   5  -6   1    2.48    0.42
  -5   6  -1    2.52    0.54
   5  -6   2    0.95    0.33
  -5   6  -2    0.82    0.42
   5  -6   3   -0.03    0.17
  -5   6  -3    0.00    0.38
   5  -6   4    3.58    0.40
  -5   6  -4   -0.01    0.58
   5  -6   5    6.91    0.53
  -5   6  -5    8.17    0.84
   5  -6   6   21.16    1.15
  -5   6  -6   16.80    1.14
   5  -6   7   36.86    1.52
  -5   6  -7   37.12    1.64
   5  -6   8    7.35    1.10
   5  -6   8    5.99    0.55
   5  -6   9    1.62    1.15
   5  -6   9    1.20    0.37
   5  -6  10    1.16    1.07
   5  -6  10    0.04    0.51
   5  -6  10    0.90    0.34
   5  -6  11    6.71    0.92
   5  -6  11    5.84    0.65
   5  -6  11    7.30    1.78
   5  -6  12   -0.08    0.59
   5  -6  12    1.01    0.40
   5  -6  12    0.63    0.71
   5  -6  13    1.07    0.77
   5  -6  13    0.01    1.00
   5  -6  13    1.20    0.72
   5  -6  14   -0.26    0.53
   5  -6  14    0.04    0.25
   5  -5 -14    0.14    0.86
   5  -5 -14    3.32    1.08
  -5   5  14   -0.28    0.97
   5  -5 -13    1.22    0.73
   5  -5 -13    0.63    1.41
  -5   5  13   -0.32    0.81
   5  -5 -12    0.28    0.64
   5  -5 -12    0.87    0.74
  -5   5  12   -0.05    0.65
   5  -5 -11   10.93    2.17
  -5   5  11   10.84    1.39
   5  -5 -10    1.43    0.75
  -5   5  10    0.29    0.69
   5  -5  -9    0.15    0.50
  -5   5   9    0.27    0.50
   5  -5  -8   24.50    2.23
  -5   5   8   25.46    1.56
   5  -5  -7   29.78    1.59
  -5   5   7   31.46    2.25
   5  -5  -6   15.88    1.11
  -5   5   6   15.46    1.17
   5  -5  -5   13.69    1.48
  -5   5   5   14.05    1.09
   5  -5  -4   15.63    0.96
  -5   5   4   15.44    1.06
   5  -5  -3   24.47    1.09
  -5   5   3   23.00    1.16
   5  -5  -2    0.10    0.27
  -5   5   2    0.17    0.31
   5  -5  -1    0.61    0.34
  -5   5   1    0.71    0.41
   5  -5   0   64.94    2.17
  -5   5   0   62.44    1.96
   5  -5   1   17.38    1.16
  -5   5  -1   17.60    0.98
   5  -5   2    0.10    0.24
  -5   5  -2    0.30    0.30
   5  -5   3    3.28    0.46
  -5   5  -3    4.98    0.64
   5  -5   4    0.12    0.20
  -5   5  -4    0.01    0.29
   5  -5   5    8.03    0.56
  -5   5  -5    7.11    0.84
   5  -5   6   20.84    0.89
  -5   5  -6   20.35    1.19
   5  -5   7   15.04    0.78
  -5   5  -7   13.72    1.09
   5  -5   8   10.64    1.07
   5  -5   9    1.88    0.75
   5  -5   9    1.60    0.43
   5  -5  10    2.73    0.78
   5  -5  10    1.65    0.49
   5  -5  11    2.92    1.22
   5  -5  11    3.37    0.61
   5  -5  11    4.43    0.92
   5  -5  12   10.94    1.22
   5  -5  12   12.08    1.31
   5  -5  12   11.42    1.40
   5  -5  13   -0.02    0.47
   5  -5  13   -0.23    0.49
   5  -5  13   -0.15    0.37
   5  -5  14    0.18    0.44
   5  -5  14   -0.03    0.33
   5  -5  14    0.06    0.43
   5  -5  15    3.38    0.97
   5  -5  15    1.91    0.77
   5  -4 -14   13.92    1.68
   5  -4 -14   13.38    1.95
   5  -4 -13    0.69    0.65
   5  -4 -13    0.30    1.15
  -5   4  13   -0.08    0.68
   5  -4 -12    5.37    1.06
   5  -4 -12    5.91    1.16
  -5   4  12   -0.12    1.06
   5  -4 -11    5.37    1.15
  -5   4  11    5.91    1.11
   5  -4 -10   15.25    2.14
  -5   4  10   13.70    1.35
   5  -4  -9    1.86    0.78
  -5   4   9    2.59    0.76
   5  -4  -8    0.53    0.37
  -5   4   8   -0.40    0.38
   5  -4  -7   14.20    1.67
  -5   4   7   13.31    1.14
   5  -4  -6    7.55    0.88
  -5   4   6    7.86    0.92
   5  -4  -5    1.80    0.53
  -5   4   5    1.50    0.58
   5  -4  -4    4.82    0.65
  -5   4   4    5.97    0.73
   5  -4  -3   26.90    1.14
  -5   4   3   28.36    1.77
   5  -4  -2   53.94    2.02
  -5   4   2   50.68    1.71
   5  -4  -1   61.81    2.12
  -5   4   1   58.31    1.85
   5  -4   0  112.19    3.09
  -5   4   0  106.51    2.84
   5  -4   1   26.68    1.35
  -5   4  -1   26.21    1.17
   5  -4   2    5.01    0.77
  -5   4  -2    5.59    0.66
   5  -4   3    1.42    0.54
  -5   4  -3    1.53    0.50
   5  -4   4    3.52    0.67
  -5   4  -4    3.85    1.00
   5  -4   5   15.21    1.05
  -5   4  -5   14.58    1.06
   5  -4   6   -0.40    0.29
  -5   4  -6    0.02    0.64
   5  -4   7    1.99    0.42
  -5   4  -7    0.01    0.55
   5  -4   8   40.07    1.45
   5  -4   9   31.67    1.64
   5  -4   9   28.20    1.66
   5  -4  10    0.88    0.55
   5  -4  10    0.55    0.43
   5  -4  11    0.75    0.65
   5  -4  11    1.19    0.76
   5  -4  11    1.12    0.62
   5  -4  12   15.76    2.02
   5  -4  12   14.15    1.14
   5  -4  12   15.69    1.30
   5  -4  13    3.11    0.80
   5  -4  13   -0.03    1.31
   5  -4  13    2.65    0.71
   5  -4  14    1.43    0.74
   5  -4  14    2.12    0.69
   5  -4  14   -0.03    1.30
   5  -4  15    2.98    1.30
   5  -4  15    2.89    1.61
   5  -4  16    0.86    1.10
   5  -4  16    0.33    1.38
   5  -4  16    1.09    0.70
   5  -3 -15    0.03    0.89
  -5   3  15    1.42    0.86
   5  -3 -14   -0.07    0.89
   5  -3 -14    3.14    0.96
  -5   3  14   -0.04    0.84
   5  -3 -13    5.41    1.70
   5  -3 -13    5.53    1.15
  -5   3  13    0.34    1.06
   5  -3 -12    4.59    1.01
   5  -3 -12    4.97    1.07
  -5   3  12   -0.05    0.95
   5  -3 -11    0.06    0.59
   5  -3 -11    0.64    0.61
  -5   3  11    0.40    0.57
   5  -3 -10   26.72    1.70
  -5   3  10   28.65    1.66
   5  -3  -9    3.08    0.81
  -5   3   9    3.23    0.79
   5  -3  -8    2.58    0.71
  -5   3   8    2.86    0.73
   5  -3  -7   -0.03    0.30
  -5   3   7    0.15    0.33
   5  -3  -6    5.52    0.75
  -5   3   6    6.62    0.81
   5  -3  -5    0.15    0.60
  -5   3   5    0.63    0.43
   5  -3  -4    0.72    0.38
  -5   3   4    0.28    0.40
   5  -3  -3   16.98    0.91
  -5   3   3   16.46    0.97
   5  -3  -2  110.00    2.71
  -5   3   2  107.08    2.85
   5  -3  -1    0.08    0.24
  -5   3   1    0.14    0.43
   5  -3   0    0.51    0.30
  -5   3   0    0.20    0.35
   5  -3   1  130.14    3.43
  -5   3  -1  127.98    3.30
   5  -3   2   -0.05    0.38
  -5   3  -2    0.38    0.33
   5  -3   3    1.75    0.58
  -5   3  -3    1.27    0.76
   5  -3   4    1.19    0.37
  -5   3  -4    1.22    0.50
   5  -3   5   18.55    1.23
  -5   3  -5   16.44    1.11
   5  -3   6   36.05    1.70
  -5   3  -6   35.80    1.62
   5  -3   7   45.20    1.54
  -5   3  -7   46.19    1.88
   5  -3   8   25.81    1.21
   5  -3   9   60.16    2.18
   5  -3   9   60.07    2.67
   5  -3  10    1.07    0.53
   5  -3  10    1.48    0.53
   5  -3  11    3.43    0.90
   5  -3  11    4.22    1.12
   5  -3  11    3.99    0.74
   5  -3  12    7.86    1.17
   5  -3  12    8.57    1.44
   5  -3  12    8.21    0.99
   5  -3  13   11.78    1.42
   5  -3  13   11.87    1.63
   5  -3  13   11.86    1.19
   5  -3  14    1.74    1.04
   5  -3  14    2.07    0.77
   5  -3  14    2.18    0.93
   5  -3  15    0.05    0.70
   5  -3  15    0.52    0.49
   5  -3  15    0.29    0.90
   5  -3  16   -0.12    0.49
   5  -3  16    0.77    0.74
   5  -3  16    1.12    0.93
   5  -2 -15    0.03    1.30
   5  -2 -15    0.04    1.28
  -5   2  15    0.86    1.13
   5  -2 -14    0.08    0.72
   5  -2 -14   -0.01    0.76
  -5   2  14    1.31    0.99
   5  -2 -13    3.94    1.07
   5  -2 -13    2.65    1.06
  -5   2  13   -0.01    1.43
   5  -2 -12    0.78    0.84
   5  -2 -12   -0.23    0.88
  -5   2  12   -0.08    0.76
   5  -2 -11    0.81    0.67
   5  -2 -11    0.46    0.64
  -5   2  11    0.44    0.91
   5  -2 -10   22.58    1.63
   5  -2 -10   19.74    1.47
  -5   2  10   23.23    2.12
   5  -2  -9   21.05    1.36
  -5   2   9   21.20    1.37
   5  -2  -8    0.69    0.48
  -5   2   8    0.39    0.49
   5  -2  -7    4.65    0.74
  -5   2   7    5.13    0.78
   5  -2  -6    8.69    0.83
  -5   2   6    9.57    1.34
   5  -2  -5    0.02    0.33
  -5   2   5    0.43    0.36
   5  -2  -4    1.19    0.44
  -5   2   4    1.64    0.76
   5  -2  -3    2.68    0.52
  -5   2   3    3.43    0.55
   5  -2  -2    7.61    0.66
  -5   2   2    8.05    0.71
   5  -2  -1   68.53    1.84
  -5   2   1   63.36    1.93
   5  -2   0    0.84    0.35
  -5   2   0    0.98    0.41
   5  -2   1   17.65    0.83
  -5   2  -1   18.53    0.97
   5  -2   2  206.57    5.08
  -5   2  -2  206.50    5.65
   5  -2   3   14.10    0.78
  -5   2  -3   15.37    0.97
   5  -2   4    4.98    0.56
  -5   2  -4    5.89    0.74
   5  -2   5   22.90    1.01
  -5   2  -5   22.38    1.26
   5  -2   6   26.20    1.58
  -5   2  -6   23.19    1.34
   5  -2   7    6.75    0.70
   5  -2   8   10.83    0.89
   5  -2   9   53.99    1.88
   5  -2   9   50.08    2.55
   5  -2  10    4.82    0.64
   5  -2  10    3.95    0.75
   5  -2  11   10.41    1.23
   5  -2  11   10.91    1.54
   5  -2  11   12.16    0.94
   5  -2  12   -0.22    0.43
   5  -2  12    0.27    0.46
   5  -2  12   -0.15    0.37
   5  -2  13   15.82    1.10
   5  -2  13   14.43    1.58
   5  -2  13   14.53    1.40
   5  -2  14    0.94    0.53
   5  -2  14    1.14    0.84
   5  -2  14    1.36    0.73
   5  -2  15    1.85    1.03
   5  -2  15    1.40    0.89
   5  -2  15    2.22    0.63
   5  -2  16    0.00    0.29
   5  -2  16   -0.33    0.51
   5  -2  16    0.14    0.44
   5  -2  17    3.27    1.19
   5  -2  17    3.81    2.00
   5  -1 -15    0.03    0.60
  -5   1  15    0.05    0.48
   5  -1 -14   -0.03    1.11
   5  -1 -14    0.06    0.72
  -5   1  14    0.45    0.60
   5  -1 -13   -0.02    0.90
   5  -1 -13   -0.04    0.85
  -5   1  13    2.79    0.76
   5  -1 -12    4.16    1.13
   5  -1 -12    3.42    1.55
  -5   1  12    4.67    0.96
   5  -1 -11    0.08    0.99
   5  -1 -11    0.48    0.57
  -5   1  11    0.42    0.53
   5  -1 -10    0.44    0.71
   5  -1 -10    1.15    0.62
  -5   1  10    1.22    0.60
   5  -1  -9   44.65    2.15
   5  -1  -9   41.58    1.83
  -5   1   9   42.84    1.86
   5  -1  -8    2.28    0.59
   5  -1  -8   -0.19    0.73
  -5   1   8    2.59    0.61
   5  -1  -7   15.78    1.47
  -5   1   7   15.75    1.58
   5  -1  -6   15.46    1.42
  -5   1   6   13.95    1.01
   5  -1  -5    0.93    0.71
  -5   1   5    1.48    0.72
   5  -1  -4    5.21    0.93
  -5   1   4    4.93    0.66
   5  -1  -3    1.95    0.74
  -5   1   3    2.40    0.50
   5  -1  -2   12.73    0.77
  -5   1   2   11.55    0.81
   5  -1  -1  131.69    3.09
  -5   1   1  122.48    3.72
   5  -1   0   18.47    0.84
  -5   1   0   16.48    0.96
   5  -1   1   11.40    0.71
  -5   1  -1   11.22    0.84
   5  -1   2  125.90    3.39
  -5   1  -2  127.01    3.37
   5  -1   3   63.68    2.25
  -5   1  -3   58.13    2.49
   5  -1   4    0.99    0.39
  -5   1  -4    0.88    0.50
   5  -1   5    0.57    0.36
  -5   1  -5    0.48    0.45
   5  -1   6   22.52    1.56
  -5   1  -6   26.25    1.96
   5  -1   7   15.67    1.01
   5  -1   8    0.47    0.43
   5  -1   9    5.99    1.21
   5  -1  10   32.49    1.69
   5  -1  10   33.92    1.29
   5  -1  11    5.63    0.90
   5  -1  11    5.29    1.03
   5  -1  11    5.16    0.91
   5  -1  12   -0.46    0.42
   5  -1  12    0.16    0.24
   5  -1  12    0.30    0.59
   5  -1  13    6.50    0.71
   5  -1  13    6.24    1.23
   5  -1  13    6.68    1.12
   5  -1  14   21.85    1.92
   5  -1  14   21.22    1.59
   5  -1  14   22.41    1.83
   5  -1  15    0.20    0.34
   5  -1  15    0.05    0.69
   5  -1  15    0.51    0.61
   5  -1  16   -0.14    0.28
   5  -1  16    0.17    0.59
   5  -1  16    0.71    0.53
   5  -1  17    0.69    1.62
   5  -1  17    0.88    0.93
   5   0 -15    0.02    0.95
   5   0 -15   -0.07    1.36
  -5   0  15    0.93    0.70
   5   0 -14    0.02    0.70
   5   0 -14   -0.16    0.74
  -5   0  14    0.54    0.54
   5   0 -13    0.06    1.59
   5   0 -13   -0.04    0.93
  -5   0  13    3.76    0.80
   5   0 -12    9.91    1.36
   5   0 -12    0.00    1.74
  -5   0  12    9.05    1.10
   5   0 -11    0.29    0.61
   5   0 -11    0.25    0.52
  -5   0  11    0.27    0.47
   5   0 -10    1.67    0.79
   5   0 -10    1.21    0.66
  -5   0  10    1.45    0.61
   5   0  -9   20.13    1.50
   5   0  -9   17.25    1.22
  -5   0   9   20.79    1.78
   5   0  -8   42.42    1.68
   5   0  -8   44.48    2.08
  -5   0   8   40.90    1.71
   5   0  -7    4.30    0.64
   5   0  -7    3.99    0.84
  -5   0   7    3.65    0.69
   5   0  -6    1.27    0.49
  -5   0   6    2.45    0.79
   5   0  -5   41.26    1.44
  -5   0   5   39.39    1.51
   5   0  -4    6.45    0.64
  -5   0   4    6.88    0.70
   5   0  -3    1.09    0.38
  -5   0   3    0.68    0.41
   5   0  -2   29.02    1.10
  -5   0   2   26.39    1.14
   5   0  -1  188.82    4.65
  -5   0   1  170.23    4.18
   5   0   0   19.50    0.90
  -5   0   0   19.93    1.01
   5   0   1   17.12    0.86
  -5   0  -1   17.29    1.43
   5   0   2   60.89    1.76
  -5   0  -2   61.49    2.00
   5   0   3   28.06    1.51
  -5   0  -3   26.63    1.31
   5   0   4    2.30    0.74
  -5   0  -4    1.73    0.60
   5   0   5   29.30    1.70
  -5   0  -5   30.17    1.52
   5   0   6   11.18    0.86
  -5   0  -6   11.84    1.04
   5   0   7   51.16    1.87
   5   0   8   17.76    1.19
   5   0   9    7.13    0.92
   5   0  10    8.03    0.57
   5   0  10    7.20    1.00
   5   0  11    4.29    1.00
   5   0  11    4.00    0.48
   5   0  11    4.36    0.91
   5   0  12    0.62    0.69
   5   0  12    0.51    0.50
   5   0  12    0.63    0.63
   5   0  13    0.01    0.20
   5   0  13    0.04    0.46
   5   0  13    0.13    0.41
   5   0  14   11.74    1.04
   5   0  14   10.80    1.59
   5   0  14   10.71    2.14
   5   0  15    7.43    0.64
   5   0  15    6.27    2.10
   5   0  15    7.93    1.49
   5   0  16    1.06    1.19
   5   0  16   -0.35    1.33
   5   0  17    1.00    0.95
   5   0  17   -0.55    1.31
   5   1 -14    0.04    0.78
   5   1 -14   -0.01    0.96
  -5  -1  14    1.29    0.64
   5   1 -13    0.07    0.70
   5   1 -13    0.05    0.88
  -5  -1  13    1.29    0.61
   5   1 -12    0.01    1.32
   5   1 -12    3.87    1.76
  -5  -1  12    3.67    0.79
   5   1 -11    2.16    0.97
   5   1 -11    1.31    0.75
  -5  -1  11    2.80    0.71
   5   1 -10    0.13    0.85
   5   1 -10    0.20    0.41
  -5  -1  10    0.20    0.39
   5   1  -9    7.88    1.15
   5   1  -9    6.71    0.86
  -5  -1   9    8.06    0.86
   5   1  -8    4.81    0.74
   5   1  -8    6.73    0.99
  -5  -1   8    6.14    0.76
   5   1  -7    8.41    0.78
   5   1  -7    7.89    1.02
  -5  -1   7    7.29    0.82
   5   1  -6   27.18    1.48
   5   1  -6   27.93    1.19
  -5  -1   6   26.07    1.23
   5   1  -5   43.82    1.47
  -5  -1   5   41.38    1.53
   5   1  -4   75.59    2.01
  -5  -1   4   71.45    2.12
   5   1  -3    2.51    0.74
  -5  -1   3    2.87    0.52
   5   1  -2    3.75    0.50
  -5  -1   2    3.06    0.56
   5   1  -1   32.78    1.14
  -5  -1   1   31.66    1.25
   5   1   0   31.00    1.45
  -5  -1   0   31.53    1.30
   5   1   1    3.01    0.50
  -5  -1  -1    3.35    0.60
   5   1   2    7.42    0.65
  -5  -1  -2    8.49    1.22
   5   1   3   42.20    1.45
  -5  -1  -3   40.68    1.69
   5   1   4   12.94    0.88
  -5  -1  -4   14.28    1.05
   5   1   5   20.37    1.10
  -5  -1  -5   21.02    1.28
   5   1   6    0.14    0.33
   5   1   7   78.93    2.60
   5   1   8   31.11    1.62
   5   1   9    4.79    0.86
   5   1  10   16.68    1.50
   5   1  10   18.60    0.69
   5   1  10   16.43    1.38
   5   1  11    0.19    0.76
   5   1  11   -0.18    0.18
   5   1  11    0.75    0.70
   5   1  12    0.09    0.26
   5   1  12    0.15    0.49
   5   1  12   -0.08    0.44
   5   1  13    4.30    1.16
   5   1  13    3.63    0.59
   5   1  13    3.26    1.04
   5   1  14    4.07    0.40
   5   1  14    3.73    1.24
   5   1  14    3.70    1.14
   5   1  15   14.77    1.01
   5   1  15   19.56    2.03
   5   1  15   20.60    1.90
   5   1  16    0.67    1.55
   5   1  16    0.76    0.89
   5   1  17    0.45    1.13
   5   1  17    1.49    1.03
   5   2 -14    0.00    0.78
   5   2 -14    0.00    0.63
  -5  -2  14    0.38    0.50
   5   2 -13    1.89    1.11
   5   2 -13    0.05    0.83
  -5  -2  13    2.73    0.71
   5   2 -12    0.36    0.93
   5   2 -12    0.04    0.82
  -5  -2  12    0.83    0.53
   5   2 -11    4.64    0.84
   5   2 -11    5.13    1.21
  -5  -2  11    3.09    0.78
   5   2 -10    1.64    0.87
   5   2 -10    1.82    0.60
  -5  -2  10    1.36    0.91
   5   2  -9   12.66    1.35
   5   2  -9    9.10    0.87
  -5  -2   9   11.21    0.94
   5   2  -8   19.23    1.47
   5   2  -8   17.07    1.03
  -5  -2   8   18.88    1.10
   5   2  -7   34.41    1.83
   5   2  -7   33.46    1.35
  -5  -2   7   33.25    1.40
   5   2  -6   31.38    1.24
   5   2  -6   30.70    1.63
  -5  -2   6   29.89    1.33
   5   2  -5   34.93    1.69
   5   2  -5   30.45    2.14
  -5  -2   5   30.95    1.74
   5   2  -4   22.84    1.25
   5   2  -4   23.63    1.02
  -5  -2   4   23.47    1.11
   5   2  -3   15.75    0.80
  -5  -2   3   14.92    0.89
   5   2  -2   26.36    1.01
  -5  -2   2   25.47    1.12
   5   2  -1    0.32    0.27
  -5  -2   1    0.27    0.33
   5   2   0   41.23    1.32
  -5  -2   0   39.93    1.50
   5   2   1    0.03    0.35
  -5  -2  -1    0.09    0.28
   5   2   2   61.21    1.83
  -5  -2  -2   58.11    2.03
   5   2   3   10.64    0.82
  -5  -2  -3   10.11    1.38
   5   2   4  156.76    4.04
  -5  -2  -4  155.66    4.32
   5   2   5    9.36    0.86
  -5  -2  -5   10.70    1.00
   5   2   6   -0.01    0.23
   5   2   7   33.18    1.58
   5   2   8   57.20    2.27
   5   2   9    1.42    0.24
   5   2   9    1.94    0.69
   5   2  10    0.16    0.51
   5   2  10    0.10    0.21
   5   2  10    0.35    0.46
   5   2  11   33.65    2.16
   5   2  11   36.82    0.87
   5   2  11   35.92    2.09
   5   2  12   -0.24    0.74
   5   2  12   -0.02    0.16
   5   2  12    0.63    0.44
   5   2  13    4.31    0.26
   5   2  13    3.38    1.26
   5   2  13    4.35    1.13
   5   2  14    1.75    1.08
   5   2  14    1.77    1.52
   5   2  15   23.92    2.38
   5   2  15   26.87    3.22
   5   2  16    6.71    2.69
   5   2  16    7.91    2.42
   5   2  17    0.84    1.49
   5   2  17    0.39    1.06
   5   3 -14    0.00    1.62
   5   3 -14    5.48    1.83
  -5  -3  14    5.55    0.98
   5   3 -13    4.01    2.08
   5   3 -13    0.05    1.56
  -5  -3  13    3.78    0.83
   5   3 -12    0.23    0.73
   5   3 -12    0.32    0.51
  -5  -3  12    0.14    0.44
   5   3 -11    9.71    2.37
   5   3 -11    9.21    1.05
  -5  -3  11    8.82    0.96
   5   3 -10    0.36    0.82
   5   3 -10    0.88    0.51
  -5  -3  10    1.12    0.51
   5   3  -9    0.74    0.41
   5   3  -9    0.55    1.13
  -5  -3   9    0.33    0.67
   5   3  -8    4.50    0.59
   5   3  -8    5.21    1.04
  -5  -3   8    4.49    0.69
   5   3  -7   48.07    1.58
   5   3  -7   51.77    2.29
  -5  -3   7   50.78    1.79
   5   3  -6   29.49    1.67
   5   3  -6   26.04    1.60
  -5  -3   6   31.13    1.33
   5   3  -5    0.44    0.39
   5   3  -5    0.12    0.26
  -5  -3   5   -0.04    0.29
   5   3  -4    9.20    0.68
   5   3  -4    8.94    0.92
  -5  -3   4    7.94    0.73
   5   3  -3   29.74    1.38
   5   3  -3   31.18    1.47
  -5  -3   3   30.57    1.20
   5   3  -2    0.65    0.40
   5   3  -2    0.77    0.32
  -5  -3   2    0.34    0.37
   5   3  -1   27.41    1.05
   5   3  -1   29.39    1.17
  -5  -3   1   27.63    1.23
   5   3   0   16.26    0.82
  -5  -3   0   15.24    0.97
   5   3   1   77.97    2.12
  -5  -3  -1   76.47    2.39
   5   3   2    0.72    0.36
  -5  -3  -2    0.35    0.44
  -5  -3  -3   37.49    1.63
   5   3   4    5.27    1.03
  -5  -3  -4    3.80    1.21
   5   3   5   31.29    1.92
   5   3   6    4.64    0.77
   5   3   7    0.81    0.55
   5   3   8   81.38    2.89
   5   3   9    4.16    0.92
   5   3   9    4.73    0.31
   5   3  10   16.36    1.60
   5   3  10   18.69    0.38
   5   3  10   16.41    1.47
   5   3  11   23.05    0.39
   5   3  11   24.68    1.92
   5   3  11   23.58    2.55
   5   3  12    4.68    1.20
   5   3  12    6.34    1.29
   5   3  13    0.06    0.59
   5   3  13    0.29    1.00
   5   3  14    0.81    0.86
   5   3  14    0.22    0.83
   5   3  15    6.34    1.34
   5   3  15    0.05    1.40
   5   3  16    8.20    1.67
   5   3  16   -0.04    2.64
   5   3  17    0.57    1.13
   5   3  17    1.31    1.22
   5   4 -14    9.11    3.02
   5   4 -14    8.31    1.39
  -5  -4  14    8.51    1.15
   5   4 -13    0.05    0.30
   5   4 -13    0.31    0.46
  -5  -4  13   -0.12    0.25
   5   4 -12    3.79    1.34
   5   4 -12    2.42    0.86
  -5  -4  12    3.70    0.77
   5   4 -11    9.19    1.58
   5   4 -11    7.99    0.99
  -5  -4  11    7.57    0.92
   5   4 -10    4.62    1.30
   5   4 -10    4.40    0.73
  -5  -4  10    4.80    0.74
   5   4  -9    0.04    0.28
   5   4  -9    0.39    0.52
  -5  -4   9   -0.04    0.47
   5   4  -8    4.59    0.59
   5   4  -8    5.26    1.15
  -5  -4   8    6.14    0.71
   5   4  -7    1.01    0.37
   5   4  -7    1.19    1.15
  -5  -4   7    0.74    0.45
   5   4  -6   29.07    1.52
   5   4  -6   32.37    1.82
  -5  -4   6   32.21    1.33
   5   4  -5    0.83    0.35
   5   4  -5    0.95    0.59
  -5  -4   5    0.43    0.61
   5   4  -4    8.89    0.99
   5   4  -4   10.42    0.69
  -5  -4   4    9.08    0.75
   5   4  -3   69.43    2.33
   5   4  -3   75.59    1.97
  -5  -4   3   71.40    2.15
   5   4  -2   33.24    1.41
   5   4  -2   32.04    1.11
  -5  -4   2   32.04    1.34
   5   4  -1    0.76    0.42
   5   4  -1    1.16    0.35
  -5  -4   1    1.19    0.45
   5   4   0   22.56    1.01
   5   4   0   23.63    0.99
  -5  -4   0   24.06    1.18
   5   4   1   69.61    1.88
   5   4   1   73.88    2.52
  -5  -4  -1   73.91    2.35
   5   4   2    0.47    0.40
   5   4   2    0.43    0.36
  -5  -4  -2    0.40    0.42
   5   4   3   88.60    2.03
   5   4   3   90.65    2.64
  -5  -4  -3   92.74    2.94
   5   4   4    9.20    0.47
   5   4   4    9.20    0.84
  -5  -4  -4    9.27    0.96
   5   4   5    4.22    0.74
   5   4   5    4.13    0.31
   5   4   6   19.20    0.54
   5   4   6   20.42    1.30
   5   4   7   16.41    1.26
   5   4   7   15.19    0.52
   5   4   8   38.17    0.66
   5   4   8   38.62    1.94
   5   4   9   47.57    2.45
   5   4   9   54.52    2.44
   5   4  10    0.01    0.90
   5   4  10   -0.44    0.84
   5   4  11    0.58    0.73
   5   4  11    0.55    0.75
   5   4  12    7.16    1.33
   5   4  12    6.80    1.43
   5   4  13    4.33    1.22
   5   4  13    3.66    1.28
   5   4  14   -0.03    0.71
   5   4  14    0.40    0.75
   5   4  15    0.40    0.79
   5   4  15    0.06    0.84
   5   4  16    8.12    1.74
   5   4  16   -0.04    2.72
   5   4  17   -0.65    0.95
   5   4  17    0.12    1.00
   5   5 -13    3.76    1.64
   5   5 -13    4.26    1.05
  -5  -5  13    4.65    0.90
   5   5 -12    0.38    0.86
   5   5 -12    0.26    0.49
  -5  -5  12    0.18    0.45
   5   5 -11    2.32    1.18
   5   5 -11    0.96    0.99
  -5  -5  11    1.62    0.61
   5   5 -10   13.11    2.69
   5   5 -10   11.41    0.96
  -5  -5  10   11.33    0.99
   5   5  -9    4.83    0.62
   5   5  -9    3.87    1.25
  -5  -5   9    3.03    1.02
   5   5  -8    1.78    0.42
   5   5  -8    0.68    0.90
  -5  -5   8    0.96    0.50
   5   5  -7    0.60    0.31
   5   5  -7    1.24    1.04
  -5  -5   7    0.15    0.38
   5   5  -6   39.88    1.67
   5   5  -6   43.21    2.22
  -5  -5   6   45.73    1.62
   5   5  -5   28.18    1.08
   5   5  -5   30.97    1.77
  -5  -5   5   29.75    1.76
   5   5  -4   -0.02    0.38
   5   5  -4    0.35    0.65
  -5  -5   4    0.16    0.29
   5   5  -3   75.11    1.97
   5   5  -3   69.31    2.42
  -5  -5   3   70.94    2.20
   5   5  -2   87.22    2.69
   5   5  -2   90.25    2.65
  -5  -5   2   85.17    2.50
   5   5  -1    3.71    0.61
   5   5  -1    3.23    0.47
  -5  -5   1    3.02    0.62
   5   5   0    1.13    0.67
   5   5   0    1.36    0.60
  -5  -5   0    0.98    0.49
   5   5   1   32.78    1.56
   5   5   1   34.48    1.29
  -5  -5  -1   33.63    1.47
   5   5   2    0.24    0.25
   5   5   2    0.14    0.31
  -5  -5  -2    0.15    0.38
   5   5   3    0.16    0.22
   5   5   3    0.29    0.34
  -5  -5  -3    0.35    0.41
   5   5   4    4.71    0.57
   5   5   4    4.01    0.69
   5   5   5   37.22    0.94
   5   5   5   35.99    1.70
   5   5   6   58.64    1.41
   5   5   6   59.61    2.31
   5   5   7    0.57    0.18
   5   5   7    0.51    0.88
   5   5   8    4.05    0.79
   5   5   8    0.01    0.80
   5   5   9   88.15    3.47
   5   5   9   88.19    4.33
   5   5  10    0.75    0.69
   5   5  10    0.31    0.71
   5   5  11    2.88    1.07
   5   5  11    2.66    1.03
   5   5  12    0.95    0.91
   5   5  12    1.09    0.94
   5   5  13    2.50    1.11
   5   5  13    1.69    1.17
   5   5  14    2.31    1.13
   5   5  14    0.00    1.79
   5   5  15    2.73    1.18
   5   5  15   -0.02    1.26
   5   5  16    1.31    1.09
   5   5  16   -0.11    1.13
   5   5  17    3.95    1.50
   5   5  17   -0.06    1.58
   5   6 -13    0.00    0.99
   5   6 -13    8.57    1.67
  -5  -6  13    4.94    0.87
   5   6 -12    2.13    1.44
   5   6 -12    2.65    0.80
  -5  -6  12    2.27    0.72
   5   6 -11    2.29    1.32
   5   6 -11    2.19    0.70
  -5  -6  11    2.37    0.68
   5   6 -10    1.10    0.98
   5   6 -10    0.61    0.49
  -5  -6  10    0.79    0.48
   5   6  -9   17.18    2.06
   5   6  -9   17.50    1.46
  -5  -6   9   16.74    1.08
   5   6  -8    0.30    0.30
   5   6  -8    0.57    0.73
  -5  -6   8    0.23    0.37
   5   6  -7    0.57    0.75
   5   6  -7    0.57    0.31
  -5  -6   7    0.68    0.64
   5   6  -6   24.62    1.80
   5   6  -6   23.36    1.24
  -5  -6   6   24.01    1.18
   5   6  -5   -0.18    0.45
   5   6  -5    0.09    0.21
  -5  -6   5    0.17    0.28
   5   6  -4    8.98    1.14
   5   6  -4    8.59    0.91
  -5  -6   4    8.67    1.14
   5   6  -3   10.87    0.68
   5   6  -3   11.82    1.13
  -5  -6   3   10.91    1.19
   5   6  -2   57.97    1.63
   5   6  -2   61.05    2.22
  -5  -6   2   56.71    1.94
   5   6  -1   31.33    1.48
   5   6  -1   33.91    1.51
  -5  -6   1   31.01    1.39
   5   6   0   15.63    0.86
   5   6   0   17.91    1.04
  -5  -6   0   14.99    1.03
   5   6   1    3.88    0.56
   5   6   1    3.30    0.54
  -5  -6  -1    2.89    0.66
   5   6   2   48.49    2.24
   5   6   2   46.68    1.49
  -5  -6  -2   44.28    1.85
   5   6   3    0.33    0.32
   5   6   3   -0.01    0.21
   5   6   4   12.10    0.85
   5   6   4   11.29    1.01
   5   6   5   10.76    0.51
   5   6   5   10.70    1.48
   5   6   6   50.56    1.13
   5   6   6   48.56    2.15
   5   6   7    8.14    0.40
   5   6   7    7.57    1.07
   5   6   8   12.56    1.40
   5   6   8   12.74    1.32
   5   6   9   29.88    2.02
   5   6   9   29.49    1.99
   5   6  10   18.03    1.68
   5   6  10   18.38    1.75
   5   6  11   11.82    1.59
   5   6  11    9.86    1.65
   5   6  12    0.47    0.76
   5   6  12    0.18    1.22
   5   6  13    2.53    1.85
   5   6  13    2.26    1.24
   5   6  14    0.52    1.14
   5   6  14   -0.02    0.75
   5   6  15    0.08    0.99
   5   6  15    0.02    0.67
   5   6  16   -0.15    1.38
   5   6  16   -0.18    0.92
   5   6  17    0.00    2.63
   5   6  17    4.91    2.54
   5   7 -12    1.40    1.35
   5   7 -11    0.24    0.66
   5   7 -11   -0.03    0.87
  -5  -7  11    0.38    0.62
   5   7 -10    0.56    0.80
   5   7 -10    0.13    0.36
  -5  -7  10    0.17    0.39
   5   7  -9   25.08    2.32
   5   7  -9   25.32    1.17
  -5  -7   9   22.10    1.30
   5   7  -8    5.22    0.59
   5   7  -8    5.24    2.11
   5   7  -7    0.05    0.21
   5   7  -7    0.53    0.56
  -5  -7   7    0.00    0.29
   5   7  -6    1.16    0.32
   5   7  -6    1.01    0.85
  -5  -7   6    0.64    0.71
   5   7  -5    0.76    0.28
   5   7  -5    0.30    0.71
  -5  -7   5    0.35    0.39
   5   7  -4   45.44    2.24
   5   7  -4   44.48    1.68
  -5  -7   4   43.05    1.67
   5   7  -3   13.14    1.83
   5   7  -3   12.34    0.72
  -5  -7   3   12.84    0.92
   5   7  -2    5.42    0.89
   5   7  -2    5.41    0.53
  -5  -7   2    5.49    0.71
   5   7  -1   48.98    1.94
   5   7  -1   48.40    1.93
  -5  -7   1   49.99    2.36
   5   7   0    0.02    0.25
   5   7   0   -0.08    0.19
  -5  -7   0    0.43    0.41
   5   7   1    1.90    0.79
   5   7   1    1.91    0.76
  -5  -7  -1    1.95    0.59
   5   7   2   37.14    1.38
   5   7   2   36.35    1.54
   5   7   3   21.91    0.97
   5   7   3   21.51    1.24
   5   7   4    2.36    0.63
   5   7   4    1.60    0.58
   5   7   5    4.32    0.60
   5   7   5    4.74    0.86
   5   7   6   17.21    1.37
   5   7   6   16.87    0.81
   5   7   7    8.83    0.34
   5   7   7    8.86    1.18
   5   7   7    9.13    1.15
   5   7   8   23.86    2.51
   5   7   8   22.06    1.70
   5   7   9    1.62    0.95
   5   7   9    2.91    0.98
   5   7  10   51.82    2.81
   5   7  10   47.60    2.77
   5   7  11    0.24    0.68
   5   7  11    0.13    0.70
   5   7  12    3.82    1.36
   5   7  12    3.30    1.99
   5   7  13   10.17    2.37
   5   7  13   -0.02    2.43
   5   7  14    3.01    1.20
   5   7  14   -0.08    1.27
   5   7  15    6.76    1.71
   5   7  15   -0.02    2.66
   5   7  16    1.39    1.19
   5   7  16    0.00    1.28
   5   7  17   -0.03    0.68
   5   7  17    0.10    1.01
   5   8 -12    1.66    1.47
   5   8 -11   -0.10    0.81
   5   8 -10    0.43    0.90
   5   8 -10    0.33    0.37
  -5  -8  10   -0.03    0.60
   5   8  -9    9.64    2.85
   5   8  -9   11.87    1.23
  -5  -8   9   10.17    0.91
   5   8  -8   -0.30    1.56
  -5  -8   8    7.20    0.74
   5   8  -7    0.56    0.45
   5   8  -7    2.09    0.82
  -5  -8   7    0.00    0.41
   5   8  -6    0.04    0.17
   5   8  -6    0.22    0.51
  -5  -8   6    0.00    0.25
   5   8  -5    0.54    0.26
   5   8  -5    0.62    0.72
  -5  -8   5    0.51    0.40
   5   8  -4   13.55    0.95
   5   8  -4   14.01    2.17
  -5  -8   4   12.80    0.92
   5   8  -3    5.14    0.51
   5   8  -3    4.89    1.56
  -5  -8   3    3.76    1.00
   5   8  -2    0.28    0.71
   5   8  -2   -0.25    0.24
  -5  -8   2   -0.02    0.34
   5   8  -1   61.77    3.09
   5   8  -1   58.31    1.74
  -5  -8   1   58.53    2.15
   5   8   0   32.76    2.17
   5   8   0   30.99    1.26
   5   8   1   13.07    0.91
   5   8   1   12.57    1.01
   5   8   2    2.16    0.50
   5   8   2    1.05    0.54
   5   8   3   20.40    1.38
   5   8   3   19.60    1.22
   5   8   4    3.28    0.48
   5   8   4    2.29    0.71
   5   8   5   25.65    0.94
   5   8   5   24.23    1.56
   5   8   6    6.59    0.63
   5   8   6    5.71    1.05
   5   8   6    6.59    1.53
   5   8   7    2.16    1.35
   5   8   7    2.26    0.83
   5   8   8    3.08    0.98
   5   8   8    2.49    1.47
   5   8   9    3.48    1.10
   5   8   9    3.36    1.11
   5   8  10   12.35    1.68
   5   8  10   15.08    1.75
   5   8  11    0.04    1.38
   5   8  11    9.38    1.39
   5   8  12    0.12    1.66
   5   8  12    1.88    1.13
   5   8  13    0.03    0.54
   5   8  13    0.00    0.55
   5   8  14    6.17    1.52
   5   8  14    0.03    1.58
   5   8  15   -0.12    1.84
   5   8  15    7.99    1.72
   5   8  16    1.65    1.30
   5   8  16   -0.02    1.36
   5   9 -11    5.45    1.93
   5   9 -10    1.13    1.96
   5   9  -9    0.26    0.92
   5   9  -8   12.77    2.01
   5   9  -8   12.87    0.72
  -5  -9   8    9.77    0.90
   5   9  -7    0.07    0.18
   5   9  -7   -0.07    0.60
  -5  -9   7    0.00    0.40
   5   9  -6    2.74    0.50
   5   9  -6    2.92    1.06
  -5  -9   6    0.00    0.50
   5   9  -5   -0.18    0.29
   5   9  -5   -0.51    0.93
  -5  -9   5    0.00    0.31
   5   9  -4    6.18    1.41
  -5  -9   4    0.01    0.81
   5   9  -3    6.84    1.83
   5   9  -3    7.51    0.56
  -5  -9   3    7.28    0.79
   5   9  -2    0.24    0.56
   5   9  -2    0.00    0.18
   5   9  -1    7.37    0.62
   5   9  -1    6.81    1.61
   5   9   0   57.67    2.31
   5   9   0   55.11    1.80
   5   9   1    3.12    0.74
   5   9   1    3.95    0.64
   5   9   2   46.65    1.88
   5   9   2   46.11    1.81
   5   9   3   53.61    2.11
   5   9   3   54.44    1.89
   5   9   4    0.23    0.44
   5   9   4   -0.09    0.48
   5   9   4    0.44    0.44
   5   9   5   -0.09    0.22
   5   9   5   -0.18    0.26
   5   9   5    0.26    0.25
   5   9   6   19.95    1.58
   5   9   6   21.84    2.24
   5   9   7    9.91    1.31
   5   9   7    9.22    1.29
   5   9   8   54.30    3.75
   5   9   8   53.60    2.75
   5   9   9    7.90    1.42
   5   9   9    8.23    1.44
   5   9  10    0.00    0.62
   5   9  10    0.22    0.60
   5   9  11   21.20    2.11
   5   9  11   19.41    2.14
   5   9  12    0.07    0.80
   5   9  12   -0.01    0.53
   5   9  13    0.01    0.50
   5   9  13    0.00    0.52
   5   9  14    2.38    1.29
   5   9  14    0.02    1.28
   5   9  15   10.39    1.94
   5   9  15   -0.22    2.09
   5   9  16   -0.28    1.01
   5   9  16    0.04    1.60
   5  10 -10   -0.08    0.84
   5  10  -9    0.46    1.08
   5  10  -8   18.30    2.43
   5  10  -7    9.14    0.53
   5  10  -7    0.58    2.81
   5  10  -6   -0.01    0.12
   5  10  -6   -0.01    0.70
   5  10  -5    2.23    1.21
   5  10  -5    3.07    0.35
   5  10  -4    3.60    0.40
   5  10  -4    3.77    1.18
  -5 -10   4    3.78    0.98
   5  10  -3    5.10    0.48
   5  10  -3    5.11    1.18
  -5 -10   3    4.15    0.99
   5  10  -2    6.32    0.58
   5  10  -2    8.17    1.83
  -5 -10   2    8.61    1.00
   5  10  -1    0.78    0.33
   5  10  -1    0.07    1.00
  -5 -10   1    0.32    0.51
   5  10   0   19.36    1.01
   5  10   0   18.55    1.45
  -5 -10   0   18.54    1.19
   5  10   1   12.49    0.97
   5  10   1   12.72    1.20
  -5 -10  -1   12.57    0.93
   5  10   2   33.30    2.24
   5  10   2   31.79    1.58
   5  10   3   -0.02    0.23
   5  10   3    0.30    0.27
   5  10   3   -0.25    0.25
   5  10   4   10.87    0.90
   5  10   4    9.73    1.71
   5  10   4   11.39    1.13
   5  10   5    5.77    1.03
   5  10   5    5.84    1.01
   5  10   6   24.72    1.79
   5  10   6   24.93    2.56
   5  10   7    0.23    0.68
   5  10   7    0.61    0.66
   5  10   8   47.83    2.72
   5  10   8   49.09    3.63
   5  10   9   12.68    1.76
   5  10   9   13.58    1.72
   5  10  10    0.03    1.28
   5  10  10    5.93    1.27
   5  10  11   -0.02    0.53
   5  10  11   -0.01    0.53
   5  10  12   -0.01    0.74
   5  10  12    0.00    0.51
   5  10  13   -0.02    0.90
   5  10  13    0.95    1.45
   5  10  14    0.01    1.06
   5  10  14    0.88    1.10
   5  10  15    0.09    1.67
   5  10  15    7.72    2.64
   5  11  -9    0.06    1.23
   5  11  -8   -0.19    1.40
   5  11  -7    0.63    1.12
   5  11  -6    0.06    0.66
   5  11  -5    4.44    0.37
   5  11  -5    0.08    1.40
  -5 -11   5    4.78    1.20
   5  11  -4    0.09    0.31
   5  11  -4   -0.16    0.70
  -5 -11   4    0.84    0.59
   5  11  -3    2.93    0.61
   5  11  -3    3.60    1.15
  -5 -11   3    3.31    0.95
   5  11  -2   -0.07    0.42
   5  11  -2    0.93    0.65
  -5 -11   2    0.33    0.52
   5  11  -1   -0.10    0.39
   5  11  -1    0.62    0.47
   5  11  -1    0.85    1.01
  -5 -11   1    0.91    0.51
   5  11   0    0.22    0.63
   5  11   0    0.37    0.45
   5  11   0    0.41    0.37
  -5 -11   0    0.86    0.49
   5  11   1   37.99    1.82
   5  11   1   41.48    2.30
   5  11   1   40.87    2.07
  -5 -11  -1   38.55    1.71
   5  11   2    8.10    1.50
   5  11   2    3.14    1.45
   5  11   2    8.13    0.92
  -5 -11  -2    8.00    0.80
   5  11   3    2.14    0.70
   5  11   3    2.32    0.71
   5  11   3    2.66    0.77
  -5 -11  -3    2.33    0.53
   5  11   4   25.19    1.74
   5  11   4   27.36    1.71
   5  11   5    1.37    0.82
   5  11   5    1.62    0.79
   5  11   6   12.15    1.43
   5  11   6   12.28    1.44
   5  11   7    0.29    0.99
   5  11   7    0.35    0.64
   5  11   8   18.75    1.85
   5  11   8   19.01    1.86
   5  11   9    0.02    1.18
   5  11   9    4.37    1.15
   5  11  10    4.80    1.24
   5  11  10    0.03    1.27
   5  11  11    0.00    0.40
   5  11  11    0.00    0.40
   5  11  12   -0.02    2.13
   5  11  12    4.25    2.12
   5  11  13   -0.03    1.38
   5  11  13    0.25    0.92
   5  11  14   -0.05    1.63
   5  11  14    4.89    1.67
   5  12  -8   -0.35    1.05
   5  12  -7    0.06    0.74
   5  12  -6    0.28    1.79
  -5 -12   6    9.85    1.60
   5  12  -5    0.36    1.25
  -5 -12   5    2.95    1.08
   5  12  -4   -0.36    0.92
  -5 -12   4    1.20    0.78
   5  12  -3    0.07    1.21
   5  12  -3    1.23    0.52
   5  12  -3    3.93    0.38
  -5 -12   3    4.00    0.99
   5  12  -2    1.02    0.49
   5  12  -2    1.52    0.37
   5  12  -2    2.28    0.99
  -5 -12   2    2.80    0.81
   5  12  -1    5.61    1.22
   5  12  -1    3.72    0.71
   5  12  -1    5.65    0.58
  -5 -12   1    4.64    0.96
   5  12   0    1.81    1.33
   5  12   0    1.01    0.56
   5  12   0    1.26    0.45
  -5 -12   0    1.66    0.64
   5  12   1   13.09    1.45
   5  12   1   12.63    1.63
   5  12   1   12.19    1.42
  -5 -12  -1   12.54    1.10
   5  12   2   20.22    1.60
   5  12   2   18.10    1.43
   5  12   2   21.56    1.41
  -5 -12  -2   19.37    1.23
   5  12   3   -0.07    0.48
   5  12   3    0.13    0.45
  -5 -12  -3    0.37    0.36
   5  12   4   10.67    1.32
   5  12   4   12.18    1.27
  -5 -12  -4   10.87    0.88
   5  12   5   34.28    2.94
   5  12   5   39.59    3.06
   5  12   6    0.82    0.73
   5  12   6    0.34    0.72
   5  12   7    2.70    1.04
   5  12   7    2.05    0.99
   5  12   8    2.43    1.67
   5  12   8    2.21    1.08
   5  12   9    8.37    2.46
   5  12   9    7.56    1.61
   5  12  10   -0.03    0.52
   5  12  10    0.00    0.52
   5  12  11    0.04    0.55
   5  12  11   -0.06    0.54
   5  12  12    0.00    1.47
   5  12  12    4.38    1.49
   5  12  13    0.01    2.97
   5  12  13    8.12    2.01
   5  13  -6    0.05    1.68
  -5 -13   6    5.44    1.46
   5  13  -5    0.31    1.21
  -5 -13   5    1.48    1.04
   5  13  -4    0.10    1.04
  -5 -13   4    0.92    0.84
   5  13  -3   -0.24    1.33
  -5 -13   3    3.86    1.05
   5  13  -2    8.39    1.36
   5  13  -2    5.86    0.68
   5  13  -2    2.13    0.58
  -5 -13   2    0.05    1.08
   5  13  -1   -0.23    0.49
   5  13  -1    0.07    0.19
   5  13  -1    0.03    0.38
  -5 -13   1   -0.03    0.37
   5  13   0    0.34    0.59
   5  13   0    0.30    0.49
  -5 -13   0   -0.04    0.49
   5  13   1    2.59    0.69
   5  13   1    1.88    0.61
  -5 -13  -1    2.28    0.75
   5  13   2   15.03    1.29
   5  13   2   16.33    1.80
  -5 -13  -2   14.26    1.21
   5  13   3    0.49    0.60
   5  13   3    0.72    0.91
  -5 -13  -3    0.59    0.48
   5  13   4    2.59    0.93
   5  13   4    2.37    1.37
  -5 -13  -4    3.23    0.67
   5  13   5    4.00    1.03
   5  13   5    3.94    1.65
  -5 -13  -5    3.96    0.66
   5  13   6    5.44    1.23
   5  13   6    4.77    1.21
   5  13   7    3.68    1.24
   5  13   7    4.61    1.87
   5  13   8    0.64    0.88
   5  13   8    0.57    0.87
   5  13   9    6.36    2.40
   5  13   9    6.62    2.36
   5  13  10    1.48    1.24
   5  13  10    1.74    1.20
   5  13  11    0.02    0.97
   5  13  11    0.62    0.98
   5  13  12    0.00    0.61
   5  13  12    0.05    0.93
   5  14  -5    0.32    1.80
  -5 -14   5    6.43    1.53
  -5 -14   4    0.68    0.96
  -5 -14   3    0.04    0.53
  -5 -14   2    0.13    0.65
  -5 -14   1    0.07    0.76
   5  14   0    1.03    0.42
   5  14   0    0.54    0.52
  -5 -14   0    0.04    1.07
   5  14   1    0.06    0.26
   5  14   1   -0.06    0.22
  -5 -14  -1    0.05    0.46
   5  14   2    0.70    0.57
   5  14   2    0.38    0.53
  -5 -14  -2    0.25    0.84
   5  14   3    3.33    0.94
   5  14   3    3.73    0.94
  -5 -14  -3    3.43    0.79
   5  14   4    1.29    0.81
   5  14   4    1.74    0.83
  -5 -14  -4    1.51    0.62
   5  14   5    0.40    0.67
   5  14   5   -0.10    0.66
  -5 -14  -5    0.55    0.43
   5  14   6    6.58    1.33
   5  14   6    4.16    2.03
   5  14   7    0.51    0.92
   5  14   7    1.20    0.90
   5  14   8   -0.15    0.76
   5  14   8   -0.25    0.73
   5  14   9    3.10    1.50
   5  14   9    5.40    1.44
   5  14  10    1.01    1.89
   5  14  10    1.57    1.92
   5  14  11   -0.92    0.64
   5  14  11    0.93    0.63
  -5 -15   2   -0.04    0.55
  -5 -15   1    0.08    0.86
  -5 -15   0   -0.06    0.77
  -5 -15  -1    0.06    0.71
   5  15   2    0.04    0.46
   5  15   2    0.35    0.64
  -5 -15  -2    0.01    0.73
   5  15   3    9.47    1.31
   5  15   3   10.59    1.32
  -5 -15  -3   10.59    1.19
   5  15   4   -0.02    0.56
   5  15   4    0.38    0.55
  -5 -15  -4    0.11    0.43
   5  15   5    1.95    0.96
   5  15   5    1.90    0.97
  -5 -15  -5    1.35    0.66
   5  15   6    3.70    1.23
   5  15   6    5.63    1.84
  -5 -15  -6    2.68    0.70
   5  15   7    2.00    1.70
   5  15   7    1.55    1.11
   5  15   8    0.21    0.72
   5  15   8    0.03    1.16
   5  15   9   -0.15    0.83
   5  15   9   -0.39    0.87
  -5 -16  -2    0.03    0.65
   5  16   3   13.26    1.47
   5  16   3   15.70    2.16
  -5 -16  -3   14.76    1.45
   5  16   4    1.37    0.90
   5  16   4    1.41    1.37
  -5 -16  -4    1.56    0.75
   5  16   5    0.91    1.00
   5  16   5    2.91    1.02
  -5 -16  -5    2.05    0.76
   6 -14  -2    9.33    1.41
  -6  14   2   10.83    1.45
   6 -14  -1   -0.01    0.54
  -6  14   1    0.35    0.57
   6 -14   0    0.01    0.48
  -6  14   0    0.22    0.52
   6 -14   1    0.76    1.03
  -6  14  -1    0.89    0.77
   6 -13  -6    1.70    0.94
  -6  13   6    0.06    1.39
   6 -13  -5    3.65    1.05
  -6  13   5    0.27    0.98
   6 -13  -4    0.42    1.00
  -6  13   4    0.16    0.59
   6 -13  -3    3.15    1.03
  -6  13   3    4.14    1.04
   6 -13  -2    2.59    0.91
  -6  13   2    3.09    1.50
   6 -13  -1    0.03    0.73
  -6  13   1    4.08    1.19
   6 -13   0    0.50    0.82
  -6  13   0    0.24    0.57
   6 -13   1    0.21    0.60
  -6  13  -1    0.06    0.47
   6 -13   2    3.16    0.73
  -6  13  -2    3.14    1.45
   6 -13   3    1.05    0.50
  -6  13  -3    0.00    0.66
   6 -13   5    2.49    1.68
   6 -12  -8   12.14    1.79
  -6  12   8   10.98    1.72
   6 -12  -7    0.12    0.52
  -6  12   7   -0.18    0.49
   6 -12  -6    0.34    1.15
  -6  12   6    0.53    0.72
   6 -12  -5    5.96    1.01
  -6  12   5    0.37    1.08
   6 -12  -4    6.89    1.06
  -6  12   4    0.05    1.01
   6 -12  -3    3.24    1.86
  -6  12   3   10.01    1.25
   6 -12  -2    0.21    0.33
  -6  12   2   -0.21    0.36
   6 -12  -1    3.77    0.90
  -6  12   1    4.77    1.00
   6 -12   0    4.44    0.82
  -6  12   0    3.75    0.97
   6 -12   1    0.04    0.37
  -6  12  -1    0.33    0.48
   6 -12   2    0.48    0.42
  -6  12  -2    0.10    0.56
   6 -12   3    9.70    0.85
  -6  12  -3    0.04    1.69
   6 -12   4    0.77    0.41
  -6  12  -4   -0.03    0.61
  -6  12  -5   -0.03    0.56
   6 -12   6   12.47    2.35
   6 -12   7    3.38    1.67
   6 -11  -9    0.34    0.73
  -6  11   9    0.00    0.69
   6 -11  -8   13.10    1.64
  -6  11   8    0.00    2.35
   6 -11  -7    0.16    0.52
  -6  11   7    0.00    0.54
   6 -11  -6    4.24    0.92
  -6  11   6   -0.54    0.90
   6 -11  -5    1.18    1.12
  -6  11   5    0.71    1.12
   6 -11  -4    4.68    0.94
  -6  11   4    4.27    1.02
   6 -11  -3   -0.14    0.40
  -6  11   3    0.15    0.63
   6 -11  -2    1.12    0.96
  -6  11   2    1.49    0.72
   6 -11  -1    2.93    0.73
  -6  11   1    3.02    0.86
   6 -11   0    1.84    0.62
  -6  11   0    1.77    0.76
   6 -11   1    2.53    0.63
  -6  11  -1    2.62    0.81
   6 -11   2    0.39    0.41
  -6  11  -2    0.69    0.57
   6 -11   3    6.76    1.14
  -6  11  -3    7.50    1.06
   6 -11   4    4.36    0.85
  -6  11  -4   -0.01    1.27
   6 -11   5    5.82    0.61
  -6  11  -5    0.09    0.98
   6 -11   6    0.61    0.35
  -6  11  -6    0.00    0.93
   6 -11   7   13.04    2.24
   6 -11   8    0.27    0.92
   6 -10 -10   -0.21    0.69
  -6  10  10    0.00    0.65
   6 -10  -9    0.58    0.79
  -6  10   9    0.00    0.72
   6 -10  -8    6.60    1.19
  -6  10   8    0.00    1.16
   6 -10  -7    3.50    1.00
  -6  10   7    0.00    1.52
   6 -10  -6    0.74    0.60
  -6  10   6    0.00    0.62
   6 -10  -5    0.52    0.53
  -6  10   5    0.08    0.56
   6 -10  -4   19.95    1.93
  -6  10   4   18.84    1.57
   6 -10  -3    0.17    0.51
  -6  10   3    1.13    0.59
   6 -10  -2    0.92    0.92
  -6  10   2    1.17    0.67
   6 -10  -1    1.26    0.57
  -6  10   1    1.36    0.67
   6 -10   0    4.21    0.71
  -6  10   0    4.03    1.35
   6 -10   1    1.25    0.49
  -6  10  -1    1.16    1.01
   6 -10   2    4.99    0.63
  -6  10  -2    2.59    0.87
   6 -10   3    1.69    0.65
  -6  10  -3    0.00    0.62
   6 -10   4   22.55    1.07
  -6  10  -4   19.33    1.49
   6 -10   5    1.19    0.57
  -6  10  -5   -0.01    0.61
   6 -10   6    3.90    0.51
  -6  10  -6    0.05    0.83
   6 -10   7    7.67    1.65
   6 -10   7    5.68    0.60
   6 -10   8    3.55    2.15
   6 -10   8    2.32    0.71
   6 -10   9    1.16    1.15
   6  -9 -11    1.51    1.07
  -6   9  11    0.00    0.95
   6  -9 -10    0.20    0.68
  -6   9  10    0.00    0.62
   6  -9  -9    0.62    0.73
  -6   9   9    0.00    0.72
   6  -9  -8    8.21    1.20
  -6   9   8    0.00    1.15
   6  -9  -7    6.81    1.11
  -6   9   7    0.00    1.71
   6  -9  -6    0.55    0.60
  -6   9   6    0.40    0.63
   6  -9  -5    0.19    0.47
  -6   9   5    0.33    0.53
   6  -9  -4    1.35    0.64
  -6   9   4    1.79    0.75
   6  -9  -3   26.32    1.37
  -6   9   3   25.51    1.62
   6  -9  -2   13.43    1.01
  -6   9   2   13.50    1.21
   6  -9  -1    6.93    0.74
  -6   9   1    6.86    0.98
   6  -9   0   18.43    1.09
  -6   9   0   15.37    1.85
   6  -9   1   15.45    0.98
  -6   9  -1   12.92    1.70
   6  -9   2    3.33    0.58
  -6   9  -2    2.09    1.21
   6  -9   3    0.59    0.35
  -6   9  -3    0.00    0.52
   6  -9   4   37.18    1.38
  -6   9  -4   30.33    1.77
   6  -9   5    3.21    0.51
  -6   9  -5   -0.01    1.23
   6  -9   6    5.72    0.56
  -6   9  -6   -0.03    0.89
   6  -9   7    0.00    0.18
  -6   9  -7   -0.04    0.44
   6  -9   8   22.60    2.31
   6  -9   8   20.76    1.03
   6  -9   9    0.71    0.73
   6  -9   9    0.00    0.46
   6  -9  10    0.88    1.60
   6  -8 -12   -0.78    0.99
  -6   8  12    0.00    0.86
   6  -8 -11    2.65    1.14
  -6   8  11    0.00    1.02
   6  -8 -10    3.61    1.11
  -6   8  10   -0.01    1.01
   6  -8  -9    1.71    0.86
  -6   8   9    0.00    0.81
   6  -8  -8    3.15    0.88
  -6   8   8    0.00    0.88
   6  -8  -7    8.52    1.12
  -6   8   7    0.00    1.72
   6  -8  -6    3.22    0.85
  -6   8   6    3.60    0.92
   6  -8  -5    8.84    0.99
  -6   8   5    6.17    1.06
   6  -8  -4    7.86    0.89
  -6   8   4    7.18    1.04
   6  -8  -3   28.84    1.96
  -6   8   3   24.92    1.53
   6  -8  -2    2.68    0.61
  -6   8   2    3.27    0.76
   6  -8  -1   40.59    1.95
  -6   8   1   32.86    1.74
   6  -8   0    1.57    0.45
  -6   8   0    0.85    0.93
   6  -8   1    6.22    0.63
  -6   8  -1    4.76    1.30
   6  -8   2    2.45    0.46
  -6   8  -2    0.41    1.09
   6  -8   3   -0.05    0.20
  -6   8  -3    0.00    0.34
   6  -8   4   16.36    1.18
  -6   8  -4   15.45    1.25
   6  -8   5   23.20    1.08
  -6   8  -5   19.28    1.46
   6  -8   6    4.75    0.80
  -6   8  -6    0.01    0.78
   6  -8   7    0.02    0.18
  -6   8  -7   -0.04    0.28
   6  -8   8   13.98    1.87
   6  -8   8   15.41    0.92
   6  -8   9    6.17    1.50
   6  -8   9    6.61    0.69
   6  -8  10    3.32    0.98
   6  -8  10   -0.04    0.70
   6  -8  11   -0.04    0.30
   6  -8  11    0.04    0.20
   6  -8  11   -0.06    0.44
   6  -7 -12    2.20    1.15
  -6   7  12    0.16    1.02
   6  -7 -11    0.59    1.12
  -6   7  11    0.01    0.69
   6  -7 -10   12.58    1.75
  -6   7  10   11.23    1.61
   6  -7  -9    1.18    0.75
  -6   7   9    0.00    0.73
   6  -7  -8    3.38    0.88
  -6   7   8    0.00    0.89
   6  -7  -7    0.54    0.62
  -6   7   7    0.92    1.02
   6  -7  -6    7.72    1.01
  -6   7   6    6.73    1.09
   6  -7  -5   36.50    1.71
  -6   7   5   34.67    1.85
   6  -7  -4   21.25    1.77
  -6   7   4   17.13    1.37
   6  -7  -3   20.48    1.15
  -6   7   3   18.77    1.34
   6  -7  -2   86.35    2.53
  -6   7   2   83.30    2.85
   6  -7  -1    0.75    0.45
  -6   7   1    1.35    0.58
   6  -7   0   22.72    1.06
  -6   7   0   18.55    1.83
   6  -7   1    4.84    0.59
  -6   7  -1    4.87    1.21
   6  -7   2    0.72    0.37
  -6   7  -2    0.65    0.83
   6  -7   3   -0.52    0.32
  -6   7  -3   -0.01    0.49
   6  -7   4   13.52    0.79
  -6   7  -4   13.30    1.16
   6  -7   5    8.52    0.65
  -6   7  -5    7.46    1.03
   6  -7   6    2.16    0.43
  -6   7  -6    0.02    0.70
   6  -7   7    4.43    0.74
  -6   7  -7    0.00    0.81
   6  -7   8    0.51    0.34
   6  -7   9    8.75    1.42
   6  -7   9    7.35    0.66
   6  -7  10    0.73    0.61
   6  -7  10    0.03    0.29
   6  -7  11    0.00    0.89
   6  -7  11    4.21    0.87
   6  -7  11    5.34    1.15
   6  -7  12    0.00    0.74
   6  -7  12    1.44    0.45
   6  -7  13   -0.04    0.73
   6  -7  13   -0.08    0.30
   6  -6 -13    0.01    0.92
   6  -6 -13    2.77    1.10
  -6   6  13   -0.05    1.00
   6  -6 -12    1.11    0.97
  -6   6  12    0.08    0.86
   6  -6 -11    5.29    1.22
  -6   6  11    0.17    1.14
   6  -6 -10    4.46    1.10
  -6   6  10    0.35    1.03
   6  -6  -9    7.62    1.12
  -6   6   9   -0.07    1.06
   6  -6  -8    0.47    0.87
  -6   6   8    0.18    0.55
   6  -6  -7    3.53    0.86
  -6   6   7    3.18    1.42
   6  -6  -6    7.66    0.96
  -6   6   6    7.48    1.07
   6  -6  -5    7.12    1.39
  -6   6   5    7.09    1.00
   6  -6  -4   41.59    1.71
  -6   6   4   41.88    1.93
   6  -6  -3    0.62    0.42
  -6   6   3    0.29    0.51
   6  -6  -2   87.56    3.13
  -6   6   2   84.29    2.87
   6  -6  -1   16.28    0.98
  -6   6   1   16.07    1.21
   6  -6   0    8.62    0.76
  -6   6   0    9.06    0.96
   6  -6   1    5.35    0.62
  -6   6  -1    5.04    1.25
   6  -6   2    6.56    0.65
  -6   6  -2    5.87    0.88
   6  -6   3    3.65    0.49
  -6   6  -3    0.00    0.72
   6  -6   4    0.34    0.30
  -6   6  -4    0.01    0.44
   6  -6   5    2.88    0.68
  -6   6  -5    0.00    0.68
   6  -6   6    3.01    0.47
  -6   6  -6    0.00    0.75
   6  -6   7   14.22    0.85
  -6   6  -7   14.95    1.30
   6  -6   8    9.82    1.06
   6  -6   9   12.09    1.52
   6  -6   9   12.72    0.85
   6  -6  10   14.50    2.32
   6  -6  10   13.99    1.36
   6  -6  11    1.27    1.14
   6  -6  11   -0.03    0.61
   6  -6  11    0.78    0.42
   6  -6  12    0.06    0.58
   6  -6  12    0.48    0.39
   6  -6  12    0.28    0.67
   6  -6  13    0.00    0.85
   6  -6  13    2.89    0.90
   6  -6  14   -0.02    0.70
   6  -6  14    0.76    0.49
   6  -5 -13    0.04    0.87
   6  -5 -13    1.97    1.01
  -6   5  13    0.08    0.88
   6  -5 -12   11.24    2.78
  -6   5  12   12.79    1.69
   6  -5 -11    2.81    0.99
  -6   5  11   -0.05    0.92
   6  -5 -10    0.92    0.69
  -6   5  10   -0.09    0.69
   6  -5  -9   19.49    1.71
  -6   5   9   18.64    1.59
   6  -5  -8   -0.06    0.45
  -6   5   8   -0.20    0.72
   6  -5  -7   -0.04    0.44
  -6   5   7   -0.28    0.47
   6  -5  -6    9.56    0.99
  -6   5   6    7.57    1.08
   6  -5  -5    6.38    0.83
  -6   5   5    4.38    0.89
   6  -5  -4    4.87    0.73
  -6   5   4    4.49    0.85
   6  -5  -3    4.02    0.71
  -6   5   3    4.87    1.20
   6  -5  -2   34.58    1.40
  -6   5   2   33.58    1.60
   6  -5  -1   32.06    1.32
  -6   5   1   31.19    1.57
   6  -5   0    0.69    0.41
  -6   5   0    0.70    0.50
   6  -5   1   11.92    1.22
  -6   5  -1   11.36    1.02
   6  -5   2    2.06    0.49
  -6   5  -2    2.87    0.67
   6  -5   3   -0.14    0.24
  -6   5  -3    0.10    0.35
   6  -5   4   -0.01    0.19
  -6   5  -4   -0.01    0.27
   6  -5   5    0.63    0.36
  -6   5  -5    0.00    0.82
   6  -5   6    2.55    0.45
  -6   5  -6    0.01    0.72
   6  -5   7   41.77    1.51
  -6   5  -7   39.35    2.03
   6  -5   8    0.34    0.34
   6  -5   9   10.19    0.83
   6  -5  10   37.18    2.07
   6  -5  10   31.83    1.50
   6  -5  11    2.53    0.88
   6  -5  11    2.02    0.59
   6  -5  12    0.07    1.18
   6  -5  12    1.05    0.77
   6  -5  12    1.56    0.82
   6  -5  13   -0.01    1.09
   6  -5  13    0.97    0.69
   6  -5  13    0.46    0.50
   6  -5  14   -0.02    1.46
   6  -5  14    2.16    0.68
   6  -5  15   -0.02    0.64
   6  -5  15    0.31    0.47
   6  -4 -13    0.07    0.53
   6  -4 -13    0.14    0.61
  -6   4  13   -0.06    0.53
   6  -4 -12   13.48    1.70
   6  -4 -12   11.83    1.76
  -6   4  12   12.59    1.63
   6  -4 -11    0.96    0.75
  -6   4  11   -0.01    0.69
   6  -4 -10    6.46    1.05
  -6   4  10    0.45    1.02
   6  -4  -9    6.15    1.08
  -6   4   9    6.67    1.13
   6  -4  -8   27.68    1.72
  -6   4   8   28.59    1.74
   6  -4  -7    2.00    0.68
  -6   4   7    1.47    0.74
   6  -4  -6   -0.19    0.25
  -6   4   6    0.21    0.27
   6  -4  -5    8.49    1.39
  -6   4   5    7.05    0.99
   6  -4  -4    4.12    0.72
  -6   4   4    3.67    0.78
   6  -4  -3    1.69    0.53
  -6   4   3    1.23    0.63
   6  -4  -2    1.30    0.50
  -6   4   2    1.40    0.60
   6  -4  -1   31.59    1.32
  -6   4   1   30.36    1.51
   6  -4   0   11.02    1.26
  -6   4   0   11.45    0.99
   6  -4   1    2.17    0.52
  -6   4  -1    2.67    0.65
   6  -4   2    2.83    0.54
  -6   4  -2    3.83    0.73
   6  -4   3    8.18    0.70
  -6   4  -3    8.37    0.96
   6  -4   4    4.97    0.61
  -6   4  -4    6.51    1.29
   6  -4   5    4.13    0.57
  -6   4  -5    3.00    0.83
   6  -4   6   10.67    1.15
  -6   4  -6   11.84    1.17
   6  -4   7   46.13    1.68
  -6   4  -7   44.27    2.14
   6  -4   8    2.69    0.56
   6  -4   9    1.54    0.52
   6  -4  10   40.68    2.07
   6  -4  10   39.24    1.72
   6  -4  11   12.00    1.20
   6  -4  11   10.57    1.01
   6  -4  12    4.96    1.14
   6  -4  12    4.87    1.36
   6  -4  12    6.52    1.06
   6  -4  13   -0.02    0.46
   6  -4  13    0.05    0.39
   6  -4  13    0.06    0.35
   6  -4  14    0.00    0.94
   6  -4  14    2.20    0.71
   6  -4  15   -0.01    0.90
   6  -4  15    1.42    0.68
   6  -3 -13   -0.03    0.44
   6  -3 -13   -0.10    0.47
  -6   3  13    0.07    0.41
   6  -3 -12   -0.04    0.96
   6  -3 -12    4.15    0.99
  -6   3  12   -0.05    0.90
   6  -3 -11    0.81    0.75
   6  -3 -11    0.72    1.07
  -6   3  11    0.12    0.66
   6  -3 -10    3.95    1.02
  -6   3  10    4.24    1.57
   6  -3  -9    3.31    0.86
  -6   3   9    2.87    0.89
   6  -3  -8   31.36    1.70
  -6   3   8   32.51    1.78
   6  -3  -7   19.82    1.30
  -6   3   7   18.97    1.37
   6  -3  -6   -0.04    0.25
  -6   3   6    0.15    0.43
   6  -3  -5    6.01    0.85
  -6   3   5    7.18    0.93
   6  -3  -4   -0.03    0.42
  -6   3   4    0.84    0.46
   6  -3  -3    0.05    0.52
  -6   3   3    0.15    0.37
   6  -3  -2    1.76    0.80
  -6   3   2    1.33    0.60
   6  -3  -1   12.10    0.88
  -6   3   1   10.71    1.46
   6  -3   0   94.08    2.59
  -6   3   0   88.54    2.80
   6  -3   1   11.17    0.82
  -6   3  -1    9.89    0.97
   6  -3   2    3.41    0.56
  -6   3  -2    3.25    0.72
   6  -3   3   23.13    1.10
  -6   3  -3   25.48    1.99
   6  -3   4   21.07    1.05
  -6   3  -4   22.67    1.42
   6  -3   5    0.22    0.29
  -6   3  -5   -0.10    0.43
   6  -3   6    0.88    0.62
  -6   3  -6    0.44    0.58
   6  -3   7   90.17    2.69
  -6   3  -7   91.60    4.17
   6  -3   8   20.41    1.20
   6  -3   9    0.91    0.49
   6  -3  10   13.43    1.19
   6  -3  10   13.65    1.09
   6  -3  11   43.03    1.94
   6  -3  11   40.28    1.93
   6  -3  12    1.14    0.79
   6  -3  12    0.64    0.97
   6  -3  12    1.13    0.62
   6  -3  13    5.03    1.31
   6  -3  13    8.18    1.03
   6  -3  13    7.75    1.09
   6  -3  14    1.27    0.93
   6  -3  14    1.24    1.01
   6  -3  14    1.02    0.72
   6  -3  15    1.45    0.74
   6  -3  15    0.05    0.93
   6  -3  16   -0.02    1.14
   6  -3  16    2.51    0.92
   6  -3  16    2.19    0.76
   6  -2 -14    0.08    1.55
   6  -2 -14   -0.03    1.05
  -6   2  14    2.97    1.37
   6  -2 -13    0.07    0.67
   6  -2 -13    0.34    0.70
  -6   2  13    0.00    0.93
   6  -2 -12   -0.04    0.67
   6  -2 -12    0.58    0.66
  -6   2  12    0.06    0.95
   6  -2 -11   17.48    2.55
   6  -2 -11   15.09    1.56
  -6   2  11   15.49    1.53
   6  -2 -10    2.02    1.00
   6  -2 -10    2.70    0.88
  -6   2  10    2.53    0.87
   6  -2  -9    8.35    1.10
  -6   2   9    9.26    1.14
   6  -2  -8    4.85    0.85
  -6   2   8    4.09    0.89
   6  -2  -7    7.84    0.92
  -6   2   7    7.65    1.45
   6  -2  -6   -0.13    0.60
  -6   2   6    0.37    0.43
   6  -2  -5    2.53    0.67
  -6   2   5    3.34    0.73
   6  -2  -4    0.17    0.39
  -6   2   4    0.33    0.43
   6  -2  -3   10.07    0.90
  -6   2   3   10.94    0.98
   6  -2  -2    1.38    0.50
  -6   2   2    0.88    0.57
   6  -2  -1    1.81    0.54
  -6   2   1    1.83    0.61
   6  -2   0  356.39    8.21
  -6   2   0  327.19    8.26
   6  -2   1   71.27    2.14
  -6   2  -1   73.16    2.48
   6  -2   2   15.18    0.92
  -6   2  -2   16.41    1.18
   6  -2   3    1.27    0.46
  -6   2  -3    1.76    0.62
   6  -2   4   49.00    1.70
  -6   2  -4   47.50    2.07
   6  -2   5    1.44    0.45
  -6   2  -5    0.38    0.65
   6  -2   6    5.23    0.69
  -6   2  -6    6.20    1.41
   6  -2   7    0.46    0.43
  -6   2  -7    0.97    0.60
   6  -2   8   12.36    1.02
   6  -2   9    7.97    0.92
   6  -2  10    1.18    0.55
   6  -2  10    1.32    0.61
   6  -2  11    0.60    0.47
   6  -2  11    0.89    0.57
   6  -2  12   18.98    1.79
   6  -2  12   19.15    2.18
   6  -2  12   21.29    1.26
   6  -2  13    6.61    1.30
   6  -2  13    5.17    1.31
   6  -2  13    6.34    1.09
   6  -2  14    1.47    0.60
   6  -2  14    1.40    0.78
   6  -2  14    0.85    0.97
   6  -2  15    2.42    0.68
   6  -2  15    2.35    1.14
   6  -2  15    1.39    0.92
   6  -2  16    0.81    0.66
   6  -2  16   -0.09    0.54
   6  -2  16   -0.05    0.38
   6  -1 -14   -0.02    0.94
   6  -1 -14   -0.01    0.91
  -6   1  14    1.38    0.78
   6  -1 -13   -0.01    1.08
   6  -1 -13    0.04    0.67
  -6   1  13    0.29    0.57
   6  -1 -12    0.04    0.81
   6  -1 -12    0.86    0.73
  -6   1  12    0.57    0.67
   6  -1 -11    0.05    1.29
   6  -1 -11    8.60    1.10
  -6   1  11    5.55    1.07
   6  -1 -10   11.62    1.82
   6  -1 -10   11.80    1.51
  -6   1  10   11.10    1.25
   6  -1  -9   11.16    1.16
   6  -1  -9   12.03    1.42
  -6   1   9   11.45    1.18
   6  -1  -8   18.04    1.25
  -6   1   8   15.49    1.89
   6  -1  -7    9.66    0.96
  -6   1   7    9.32    1.06
   6  -1  -6    1.13    0.55
  -6   1   6    1.36    0.61
   6  -1  -5    0.21    0.41
  -6   1   5    0.40    0.45
   6  -1  -4   11.05    0.89
  -6   1   4   10.05    0.97
   6  -1  -3   19.27    1.10
  -6   1   3   16.89    1.19
   6  -1  -2    0.59    0.46
  -6   1   2    1.51    0.80
   6  -1  -1    5.48    0.74
  -6   1   1    6.55    0.81
   6  -1   0  112.26    2.96
  -6   1   0  103.26    3.11
   6  -1   1  132.40    3.37
  -6   1  -1  127.40    3.70
   6  -1   2    0.24    0.36
  -6   1  -2    0.60    0.46
   6  -1   3   22.16    1.11
  -6   1  -3   21.81    1.35
   6  -1   4   14.79    1.38
  -6   1  -4   14.29    1.77
   6  -1   5   21.75    1.59
  -6   1  -5   21.86    1.47
   6  -1   6   13.76    1.00
  -6   1  -6   15.17    1.32
   6  -1   7    0.84    0.50
  -6   1  -7    0.74    0.64
   6  -1   9   61.75    2.43
   6  -1  10    0.04    0.53
   6  -1  11    0.17    0.33
   6  -1  11    0.34    0.49
   6  -1  12   27.41    2.07
   6  -1  12   27.67    1.78
   6  -1  12   28.60    1.81
   6  -1  13    0.69    0.74
   6  -1  13    0.10    0.41
   6  -1  13    0.96    0.61
   6  -1  14    6.63    0.78
   6  -1  14    4.44    1.85
   6  -1  14    5.47    1.43
   6  -1  15    0.75    0.85
   6  -1  15    0.38    0.67
   6  -1  15    0.53    0.75
   6  -1  16    2.69    1.20
   6  -1  16    4.55    2.06
   6   0 -14    0.15    0.96
   6   0 -14    0.00    1.08
  -6   0  14    1.77    0.80
   6   0 -13   -0.13    0.71
   6   0 -13   -0.06    1.02
  -6   0  13    0.40    0.55
   6   0 -12   -0.03    0.84
   6   0 -12   -0.08    0.46
  -6   0  12    0.16    0.42
   6   0 -11    0.10    0.98
   6   0 -11    0.01    0.81
  -6   0  11    3.66    0.76
   6   0 -10    7.38    1.03
   6   0 -10    6.82    1.25
  -6   0  10    2.66    1.62
   6   0  -9    3.08    1.19
   6   0  -9    3.10    1.02
  -6   0   9    3.13    0.83
   6   0  -8    0.25    0.43
   6   0  -8    0.23    0.55
  -6   0   8    0.21    0.46
   6   0  -7   68.74    2.32
   6   0  -7   62.55    2.67
  -6   0   7   64.88    2.40
   6   0  -6    7.18    0.86
  -6   0   6    7.66    0.94
   6   0  -5    1.11    0.51
  -6   0   5    1.28    0.57
   6   0  -4    0.42    0.46
  -6   0   4    1.12    0.51
   6   0  -3   17.29    1.05
  -6   0   3   16.43    1.12
   6   0  -2    5.94    0.73
  -6   0   2    6.05    0.81
   6   0  -1   14.26    0.93
  -6   0   1   12.97    1.04
   6   0   0    0.59    0.42
  -6   0   0    1.11    0.51
   6   0   1   36.72    1.39
  -6   0  -1   36.70    1.70
   6   0   2   10.22    1.20
  -6   0  -2   11.38    1.03
   6   0   3   26.60    1.26
  -6   0  -3   29.13    1.58
   6   0   4    0.00    0.26
  -6   0  -4   -0.12    0.36
   6   0   5   13.00    0.96
  -6   0  -5   12.77    1.22
   6   0   6    7.38    0.84
  -6   0  -6    7.39    1.07
   6   0   7   10.72    0.99
  -6   0  -7    8.40    1.18
   6   0   8    2.42    0.71
   6   0   9    0.20    0.46
   6   0  10   22.95    1.57
   6   0  11    1.77    0.46
   6   0  11    3.68    1.26
   6   0  12   40.62    2.51
   6   0  12   40.49    1.44
   6   0  12   41.62    2.32
   6   0  13   17.96    1.87
   6   0  13   17.00    1.35
   6   0  13   18.73    1.71
   6   0  14    1.52    0.46
   6   0  14    1.93    1.09
   6   0  14    2.00    0.94
   6   0  15    0.34    0.72
   6   0  15   -0.13    0.46
   6   0  15   -0.72    0.65
   6   0  16    2.24    2.11
   6   0  16    3.34    1.24
   6   0  17    4.00    1.54
   6   0  17    3.03    1.34
   6   1 -13    0.06    0.95
   6   1 -13   -0.05    1.12
  -6  -1  13    2.71    0.82
   6   1 -12   -0.02    0.50
   6   1 -12   -0.02    0.63
  -6  -1  12    0.24    0.46
   6   1 -11    0.02    0.61
   6   1 -11    0.06    0.45
  -6  -1  11    0.21    0.45
   6   1 -10   11.83    1.18
   6   1 -10   13.62    1.66
  -6  -1  10   14.46    1.30
   6   1  -9   11.96    1.09
   6   1  -9   11.96    2.26
  -6  -1   9   12.61    1.17
   6   1  -8    0.61    0.74
   6   1  -8    0.66    0.67
  -6  -1   8    0.40    0.80
   6   1  -7    0.35    0.64
   6   1  -7    0.64    0.88
  -6  -1   7    0.22    0.46
   6   1  -6   69.65    2.85
   6   1  -6   62.18    2.59
  -6  -1   6   61.61    2.28
   6   1  -5    6.83    1.23
  -6  -1   5    6.94    0.88
   6   1  -4    6.33    1.17
  -6  -1   4    6.13    0.82
   6   1  -3    1.25    0.70
  -6  -1   3    0.41    0.49
   6   1  -2   43.54    1.60
  -6  -1   2   39.41    1.67
   6   1  -1    0.14    0.30
  -6  -1   1    0.02    0.54
   6   1   0   18.69    1.02
  -6  -1   0   17.60    1.69
   6   1   1   24.96    1.17
  -6  -1  -1   24.49    1.38
   6   1   2   64.34    2.05
  -6  -1  -2   60.24    2.25
   6   1   3    2.45    0.57
  -6  -1  -3    2.34    1.11
   6   1   4    0.07    0.27
  -6  -1  -4   -0.04    0.56
   6   1   5   43.96    1.81
  -6  -1  -5   44.37    2.12
   6   1   6   32.80    2.21
  -6  -1  -6   30.95    1.82
   6   1   7    1.40    0.60
   6   1   8    0.48    0.53
   6   1   9    3.26    0.82
   6   1  10    2.02    0.80
   6   1  11    1.81    0.53
   6   1  11   -0.05    0.84
   6   1  11    1.00    0.76
   6   1  12    1.55    1.02
   6   1  12    1.96    0.58
   6   1  12    2.20    0.89
   6   1  13   21.55    2.15
   6   1  13   24.62    1.28
   6   1  13   24.14    2.88
   6   1  14    3.35    1.35
   6   1  14    3.66    0.45
   6   1  14    4.41    1.22
   6   1  15    1.49    1.24
   6   1  15    2.70    1.13
   6   1  16    4.55    2.38
   6   1  16    3.78    1.42
   6   1  17    1.23    1.27
   6   1  17    1.43    1.14
   6   2 -13    0.11    1.06
   6   2 -13   -0.01    2.00
  -6  -2  13    3.43    0.87
   6   2 -12   -0.04    0.78
   6   2 -12   -0.07    1.01
  -6  -2  12    1.79    0.67
   6   2 -11   -0.01    0.72
   6   2 -11    0.01    0.51
  -6  -2  11    0.92    0.75
   6   2 -10    0.96    0.59
   6   2 -10    1.52    0.89
  -6  -2  10    0.89    0.65
   6   2  -9   19.20    1.26
   6   2  -9   23.11    1.90
  -6  -2   9   24.62    1.47
   6   2  -8    4.28    1.08
   6   2  -8    3.93    0.72
  -6  -2   8    4.75    0.83
   6   2  -7    6.33    0.79
   6   2  -7    7.60    1.15
  -6  -2   7    8.17    1.35
   6   2  -6    4.41    0.71
   6   2  -6    5.01    0.99
  -6  -2   6    4.41    0.80
   6   2  -5   64.94    2.63
   6   2  -5   72.55    2.26
  -6  -2   5   69.03    2.98
   6   2  -4   18.64    1.33
   6   2  -4   19.82    1.13
  -6  -2   4   19.12    1.18
   6   2  -3    2.97    0.58
  -6  -2   3    2.05    0.63
   6   2  -2    9.48    0.83
  -6  -2   2    8.93    1.32
   6   2  -1    2.42    0.56
  -6  -2   1    3.00    0.66
   6   2   0    0.87    0.59
  -6  -2   0    0.34    0.48
   6   2   1   11.47    1.25
  -6  -2  -1   10.16    1.03
   6   2   2  129.34    3.43
  -6  -2  -2  127.49    3.84
   6   2   3    3.51    0.65
  -6  -2  -3    3.63    0.82
   6   2   4    0.48    0.46
  -6  -2  -4    0.88    0.58
   6   2   5   -0.22    0.55
  -6  -2  -5   -0.06    0.45
   6   2   6   95.72    3.07
  -6  -2  -6   92.70    3.39
   6   2   7    7.27    0.97
   6   2   8    0.37    0.51
   6   2   9   28.37    1.81
   6   2  10    7.00    1.15
   6   2  11    0.57    0.71
   6   2  11    0.40    0.21
   6   2  11    0.58    1.02
   6   2  12    2.58    1.62
   6   2  12    2.10    0.43
   6   2  12    3.01    0.99
   6   2  13   21.61    2.15
   6   2  13   22.00    0.67
   6   2  13   21.01    2.05
   6   2  14    9.18    1.79
   6   2  14   10.47    1.62
   6   2  15    0.72    0.86
   6   2  15   -0.02    0.78
   6   2  16    0.85    1.74
   6   2  16    0.90    1.04
   6   2  17    5.05    1.82
   6   2  17    6.01    1.68
   6   3 -13   -0.03    0.66
   6   3 -13    0.04    0.48
  -6  -3  13    0.06    0.42
   6   3 -12    5.44    1.97
   6   3 -12    0.16    0.89
  -6  -3  12    2.41    0.81
   6   3 -11    0.05    0.63
   6   3 -11   -0.09    0.42
  -6  -3  11   -0.08    0.40
   6   3 -10   -0.04    0.43
   6   3 -10    0.04    0.70
  -6  -3  10    0.50    0.45
   6   3  -9   14.01    1.10
   6   3  -9   19.00    1.79
  -6  -3   9   19.37    1.93
   6   3  -8   17.85    1.12
   6   3  -8   20.95    1.79
  -6  -3   8   22.09    1.38
   6   3  -7    1.00    0.66
   6   3  -7    0.40    0.39
  -6  -3   7    0.26    0.47
   6   3  -6   19.02    1.60
   6   3  -6   20.99    1.09
  -6  -3   6   21.23    1.30
   6   3  -5   10.35    0.86
   6   3  -5    8.20    1.15
  -6  -3   5    8.27    0.94
   6   3  -4    1.83    0.50
   6   3  -4    1.03    0.69
  -6  -3   4    0.93    0.56
   6   3  -3    1.47    0.61
   6   3  -3    1.79    0.51
  -6  -3   3    0.70    0.84
   6   3  -2    0.00    0.41
   6   3  -2    0.07    0.55
  -6  -3   2    0.63    0.41
   6   3  -1   56.31    1.81
  -6  -3   1   52.39    2.06
   6   3   0    0.61    0.41
  -6  -3   0    0.95    0.52
   6   3   1    1.15    0.49
  -6  -3  -1    1.89    0.61
   6   3   2   32.08    1.41
  -6  -3  -2   33.46    1.70
   6   3   3   17.17    1.12
  -6  -3  -3   19.30    1.36
   6   3   4   15.87    1.11
  -6  -3  -4   14.92    1.34
   6   3   5    3.91    0.79
  -6  -3  -5    3.73    0.92
   6   3   6    5.45    0.89
   6   3   7   31.98    1.74
   6   3   8    1.22    0.70
   6   3   9   10.06    1.26
   6   3  10   29.15    0.77
   6   3  10   32.58    2.04
   6   3  11    0.09    0.56
   6   3  11    0.08    0.15
   6   3  11    0.27    0.51
   6   3  12    0.02    0.61
   6   3  12    0.09    0.10
   6   3  12    0.02    0.54
   6   3  13    0.77    1.86
   6   3  13    2.90    1.10
   6   3  14   14.48    2.08
   6   3  14   14.35    2.82
   6   3  15    0.04    0.74
   6   3  15    0.24    1.05
   6   3  16   -0.04    1.65
   6   3  16   -0.72    0.98
   6   3  17    0.87    1.28
   6   3  17    1.08    1.83
   6   4 -13    0.07    0.98
   6   4 -13   -0.60    0.64
  -6  -4  13   -0.16    0.60
   6   4 -12    3.30    0.97
   6   4 -12    3.55    1.44
  -6  -4  12    3.04    0.91
   6   4 -11    1.61    1.29
   6   4 -11    2.16    0.79
  -6  -4  11    2.57    0.80
   6   4 -10    1.84    0.62
   6   4 -10    0.04    1.06
  -6  -4  10    0.92    0.67
   6   4  -9    1.78    0.60
   6   4  -9    1.96    1.10
  -6  -4   9    1.96    0.69
   6   4  -8   36.22    1.54
   6   4  -8   40.36    3.56
  -6  -4   8   42.18    1.88
   6   4  -7    1.66    0.50
   6   4  -7    1.75    0.92
  -6  -4   7    2.33    0.64
   6   4  -6    0.91    0.41
   6   4  -6    0.99    0.71
  -6  -4   6    0.16    0.80
   6   4  -5   40.32    2.13
   6   4  -5   44.62    1.57
  -6  -4   5   42.15    1.79
   6   4  -4    0.45    0.49
   6   4  -4    0.21    0.35
  -6  -4   4    0.10    0.41
   6   4  -3    0.21    0.76
   6   4  -3    0.47    0.60
  -6  -4   3    0.34    0.43
   6   4  -2    1.09    0.57
   6   4  -2    1.14    0.46
  -6  -4   2    1.28    0.55
   6   4  -1   86.95    2.67
   6   4  -1   91.14    2.54
  -6  -4   1   89.24    2.89
   6   4   0   49.74    2.30
   6   4   0   48.90    1.69
  -6  -4   0   51.42    2.09
   6   4   1    6.71    0.68
   6   4   1    6.33    1.06
  -6  -4  -1    6.75    0.94
   6   4   2   23.99    1.04
   6   4   2   24.14    1.22
  -6  -4  -2   22.28    1.48
   6   4   3    2.00    0.43
   6   4   3    2.19    0.61
  -6  -4  -3    1.75    1.15
   6   4   4   23.36    1.96
  -6  -4  -4   22.08    2.25
   6   4   5   -0.21    0.42
  -6  -4  -5   -0.20    0.50
   6   4   6    3.36    0.81
   6   4   7   83.43    3.10
   6   4   8   10.49    1.29
   6   4   9    0.10    0.53
   6   4   9    0.14    0.10
   6   4  10   18.16    1.78
   6   4  10   19.43    0.44
   6   4  10   20.39    0.40
   6   4  10   19.72    1.72
   6   4  11   11.21    1.60
   6   4  11   10.36    1.52
   6   4  12    8.22    1.56
   6   4  12    7.35    2.21
   6   4  13    7.01    1.62
   6   4  13    7.54    1.50
   6   4  14    0.06    1.91
   6   4  14    2.11    1.12
   6   4  15    0.04    1.32
   6   4  15    3.20    1.23
   6   4  16    0.17    0.75
   6   4  16    0.02    0.81
   6   4  17    0.08    1.24
   6   4  17    1.13    1.13
   6   5 -12    3.08    1.43
   6   5 -12    1.88    1.32
  -6  -5  12    1.43    0.82
   6   5 -11    1.25    0.99
   6   5 -11    0.26    1.67
  -6  -5  11    0.62    0.65
   6   5 -10    1.33    1.10
   6   5 -10    0.90    0.97
  -6  -5  10    1.22    0.66
   6   5  -9    2.43    1.03
   6   5  -9    3.18    1.30
  -6  -5   9    3.46    0.78
   6   5  -8   19.92    1.60
   6   5  -8   19.62    2.02
  -6  -5   8   19.83    1.95
   6   5  -7    1.99    0.51
   6   5  -7    1.94    0.99
  -6  -5   7    1.59    0.65
   6   5  -6    0.44    0.37
   6   5  -6    1.21    0.72
  -6  -5   6    0.37    0.73
   6   5  -5   39.21    1.42
   6   5  -5   36.56    2.09
  -6  -5   5   39.49    1.75
   6   5  -4    0.35    0.58
   6   5  -4    0.17    0.57
  -6  -5   4    0.54    0.46
   6   5  -3    3.86    0.62
   6   5  -3    2.70    0.83
  -6  -5   3    3.48    0.71
   6   5  -2    0.12    0.47
   6   5  -2    0.20    0.36
  -6  -5   2    0.86    0.44
   6   5  -1    7.74    0.89
   6   5  -1    8.18    0.74
  -6  -5   1    8.46    0.95
   6   5   0   25.85    1.32
   6   5   0   25.26    1.19
  -6  -5   0   25.72    1.52
   6   5   1    1.47    0.47
   6   5   1    1.10    0.47
  -6  -5  -1    1.17    0.63
   6   5   2    1.36    0.63
   6   5   2    0.98    0.48
  -6  -5  -2   -0.13    0.94
   6   5   3  108.01    3.13
   6   5   3  108.96    3.29
  -6  -5  -3  108.54    3.62
   6   5   4   47.80    1.41
   6   5   4   48.42    2.04
  -6  -5  -4   46.83    2.25
   6   5   5    6.10    0.69
   6   5   5    5.49    0.92
   6   5   6   11.84    0.77
   6   5   6   10.31    1.15
   6   5   7   53.98    1.25
   6   5   7   50.87    2.40
   6   5   8    6.14    0.31
   6   5   8    7.28    1.76
   6   5   9    4.59    0.17
   6   5   9    5.73    1.12
   6   5  10    1.90    1.04
   6   5  10    2.70    0.97
   6   5  11    3.70    1.80
   6   5  11    3.84    1.23
   6   5  12    0.24    0.75
   6   5  12    0.20    0.68
   6   5  13    0.00    1.57
   6   5  13    9.58    1.47
   6   5  14    0.03    0.98
   6   5  14    1.11    0.96
   6   5  15    6.49    1.52
   6   5  15   -0.02    1.59
   6   5  16   -0.04    1.29
   6   5  16    1.91    1.20
   6   5  17    0.03    1.64
   6   5  17    0.31    0.97
   6   6 -12    1.08    1.46
   6   6 -12   -0.02    0.52
  -6  -6  12    0.25    0.50
   6   6 -11    2.86    0.84
   6   6 -11    2.61    1.51
  -6  -6  11    3.34    0.86
   6   6 -10    2.00    1.29
   6   6 -10    1.99    0.67
  -6  -6  10    1.33    0.71
   6   6  -9    1.91    0.61
   6   6  -9    2.76    1.87
  -6  -6   9    2.20    0.70
   6   6  -8    6.77    1.15
   6   6  -8    6.03    1.48
  -6  -6   8    5.66    0.93
   6   6  -7   24.89    2.13
   6   6  -7   24.82    1.18
  -6  -6   7   26.97    1.49
   6   6  -6    2.72    1.61
   6   6  -6    2.74    0.52
  -6  -6   6    2.30    1.09
   6   6  -5    0.48    0.35
   6   6  -5    1.43    0.72
  -6  -6   5    0.35    0.48
   6   6  -4    2.64    0.75
   6   6  -4    1.91    0.84
  -6  -6   4    1.38    0.64
   6   6  -3    2.06    0.53
   6   6  -3    2.09    0.84
  -6  -6   3    2.73    0.99
   6   6  -2   14.23    0.89
   6   6  -2   12.57    1.85
  -6  -6   2   13.36    1.12
   6   6  -1    5.83    0.85
   6   6  -1    5.11    0.65
  -6  -6   1    7.12    0.90
   6   6   0   37.00    1.46
   6   6   0   36.77    1.63
  -6  -6   0   38.63    1.83
   6   6   1    5.30    0.73
   6   6   1    6.44    0.71
  -6  -6  -1    4.61    1.42
   6   6   2   24.19    1.28
   6   6   2   26.26    1.18
  -6  -6  -2   24.78    1.59
   6   6   3   28.54    1.16
   6   6   3   27.71    1.47
  -6  -6  -3   27.41    1.72
   6   6   4   60.36    1.71
   6   6   4   59.65    2.34
   6   6   5    2.23    0.70
   6   6   5    1.52    0.58
   6   6   6   36.49    1.04
   6   6   6   37.11    1.97
   6   6   7    4.10    0.33
   6   6   7    4.53    1.00
   6   6   8   11.85    0.51
   6   6   8   10.30    1.41
   6   6   9    3.59    1.06
   6   6   9    2.47    1.02
   6   6  10    5.79    1.37
   6   6  10    6.21    1.93
   6   6  11    0.40    0.76
   6   6  11    0.40    0.81
   6   6  12    2.72    1.30
   6   6  12    3.52    1.27
   6   6  13    2.06    1.06
   6   6  13   -0.05    1.18
   6   6  14   -0.01    0.97
   6   6  14    0.77    0.92
   6   6  15    5.28    1.58
   6   6  15    0.00    2.58
   6   6  16    0.00    1.79
   6   6  16    6.62    1.67
   6   7 -11    0.88    0.95
   6   7 -11    1.02    1.25
  -6  -7  11    0.87    0.67
   6   7 -10    1.89    2.30
   6   7 -10    2.80    0.71
  -6  -7  10    2.69    0.80
   6   7  -9    0.38    0.38
   6   7  -9   -0.21    0.89
  -6  -7   9   -0.01    0.75
   6   7  -8    0.02    0.21
   6   7  -8    0.11    0.48
  -6  -7   8   -0.04    0.28
   6   7  -7   33.09    1.80
   6   7  -7   30.57    2.52
  -6  -7   7   28.97    1.60
   6   7  -6   10.38    2.37
   6   7  -6    9.25    0.73
  -6  -7   6    8.83    1.00
   6   7  -5   12.93    1.56
   6   7  -5   12.54    0.79
  -6  -7   5   11.07    1.07
   6   7  -4    0.17    0.51
   6   7  -4   -0.56    0.41
  -6  -7   4    0.13    0.37
   6   7  -3   21.18    1.65
   6   7  -3   21.55    1.08
  -6  -7   3   21.24    1.95
   6   7  -2   24.56    1.61
   6   7  -2   26.15    1.59
  -6  -7   2   22.76    1.44
   6   7  -1    1.81    1.12
   6   7  -1    2.38    0.53
  -6  -7   1    2.32    0.70
   6   7   0   14.88    0.94
   6   7   0   15.78    1.69
  -6  -7   0   13.10    1.22
   6   7   1   42.12    1.66
   6   7   1   46.92    2.39
  -6  -7  -1   43.85    2.81
   6   7   2    0.23    0.60
   6   7   2    0.27    0.62
  -6  -7  -2    0.44    0.52
   6   7   3   32.07    1.31
   6   7   3   34.27    2.17
   6   7   4   16.66    0.88
   6   7   4   15.81    1.27
   6   7   5    6.92    0.83
   6   7   5    7.65    1.02
   6   7   6   12.93    0.63
   6   7   6   13.27    1.32
   6   7   7   15.29    0.79
   6   7   7   14.25    2.16
   6   7   8    4.59    1.10
   6   7   8    4.11    0.35
   6   7   8    2.84    1.11
   6   7   9   30.73    2.23
   6   7   9   30.93    2.18
   6   7  10    1.01    0.81
   6   7  10    0.00    0.78
   6   7  11   18.70    3.04
   6   7  11   16.22    1.97
   6   7  12   20.31    2.23
   6   7  12   19.35    2.28
   6   7  13   -0.02    0.86
   6   7  13   -0.53    0.85
   6   7  14    0.05    1.14
   6   7  14    2.03    1.63
   6   7  15   -0.04    1.19
   6   7  15    1.95    1.71
   6   7  16    7.84    2.59
   6   7  16    0.00    1.74
   6   8 -10    2.61    1.25
   6   8 -10    1.33    0.58
  -6  -8  10   -0.01    0.65
   6   8  -9    0.70    0.71
   6   8  -9   -0.17    0.48
  -6  -8   9    0.03    0.37
   6   8  -8    0.67    0.37
   6   8  -8   -0.11    0.93
  -6  -8   8    0.00    0.49
   6   8  -7    0.11    2.67
  -6  -8   7    9.30    1.03
   6   8  -6   20.11    1.35
   6   8  -6   20.27    2.09
  -6  -8   6   17.78    1.31
   6   8  -5    0.32    0.27
   6   8  -5   -0.10    0.64
  -6  -8   5   -0.09    0.41
   6   8  -4    1.74    0.91
   6   8  -4    1.36    0.65
  -6  -8   4    1.28    0.62
   6   8  -3    1.68    0.93
   6   8  -3    2.36    0.50
  -6  -8   3    2.07    0.68
   6   8  -2   32.28    1.96
   6   8  -2   34.65    1.78
  -6  -8   2   32.42    2.39
   6   8  -1   -0.34    0.35
   6   8  -1    0.12    0.23
  -6  -8   1    0.16    0.33
   6   8   0    2.84    0.78
   6   8   0    2.87    0.56
  -6  -8   0    2.95    0.78
   6   8   1    3.88    0.77
   6   8   1    3.66    0.98
   6   8   2    2.24    0.63
   6   8   2    2.26    1.01
   6   8   3   19.85    1.12
   6   8   3   19.43    1.91
   6   8   4   15.01    1.85
   6   8   4   15.24    1.32
   6   8   5   25.53    1.06
   6   8   5   25.08    1.65
   6   8   6    2.20    0.39
   6   8   6    2.72    0.86
   6   8   7    2.29    0.48
   6   8   7    0.50    0.89
   6   8   7    2.12    1.34
   6   8   8    0.11    0.51
   6   8   8   -0.22    0.49
   6   8   9   16.53    2.60
   6   8   9   16.03    1.79
   6   8  10    5.68    1.22
   6   8  10    0.01    1.16
   6   8  11    1.41    0.95
   6   8  11   -0.03    0.91
   6   8  12    0.00    0.50
   6   8  12   -0.01    0.48
   6   8  13    0.00    0.60
   6   8  13    0.04    0.60
   6   8  14    1.84    1.84
   6   8  14   -0.09    1.95
   6   8  15    0.50    1.45
   6   8  15   -0.01    0.95
   6   8  16    5.19    2.66
   6   8  16   -0.20    2.75
   6   9 -10    3.15    1.75
   6   9  -9    0.24    0.99
   6   9  -8    0.27    0.32
   6   9  -8   -0.15    1.29
  -6  -9   8    0.01    0.44
   6   9  -7    0.16    0.26
   6   9  -7   -0.09    0.68
  -6  -9   7   -0.02    0.37
   6   9  -6   18.64    0.93
   6   9  -6   16.71    2.14
  -6  -9   6   16.24    1.27
   6   9  -5    9.46    0.70
   6   9  -5    8.10    1.63
  -6  -9   5    8.30    0.99
   6   9  -4    1.18    0.58
   6   9  -4    1.79    0.85
  -6  -9   4   -0.02    0.58
   6   9  -3    0.39    0.34
   6   9  -3    0.52    0.67
  -6  -9   3    0.31    0.51
   6   9  -2    8.04    1.01
   6   9  -2    6.19    1.21
  -6  -9   2    6.36    0.97
   6   9  -1    3.27    0.98
   6   9  -1    4.48    0.64
   6   9   0    3.87    0.91
   6   9   0    4.48    0.65
   6   9   1   -0.01    0.38
   6   9   1    0.23    0.48
   6   9   2   21.16    1.34
   6   9   2   21.17    1.34
   6   9   3    3.46    1.03
   6   9   3    3.16    0.79
   6   9   4    7.22    0.77
   6   9   4    7.62    1.57
   6   9   5    4.57    1.00
   6   9   5    5.21    0.63
   6   9   6   25.38    1.03
   6   9   6   22.39    1.76
   6   9   6   25.18    1.82
   6   9   7    0.31    0.24
   6   9   7    0.02    0.63
   6   9   7    0.51    0.99
   6   9   8    0.63    0.70
   6   9   8    0.08    0.70
   6   9   9    1.39    0.93
   6   9   9    0.01    1.39
   6   9  10   31.29    2.55
   6   9  10   32.82    2.49
   6   9  11    0.00    0.59
   6   9  11    0.05    0.56
   6   9  12    0.00    0.43
   6   9  12    0.00    0.43
   6   9  13    0.00    0.65
   6   9  13    0.07    0.94
   6   9  14    0.04    0.96
   6   9  14    0.00    0.64
   6   9  15   -0.01    0.57
   6   9  15    0.00    0.59
   6  10  -9    0.24    1.05
   6  10  -8   -0.01    0.57
   6  10  -7    1.50    0.44
   6  10  -7   -0.16    1.25
   6  10  -6    0.76    0.34
   6  10  -6    0.18    1.02
  -6 -10   6    0.01    0.84
   6  10  -5    2.14    0.59
   6  10  -5   -0.13    1.05
  -6 -10   5    0.02    0.58
   6  10  -4    4.91    0.54
   6  10  -4    4.20    1.28
  -6 -10   4   -0.01    0.79
   6  10  -3    1.96    0.47
   6  10  -3    2.24    1.04
   6  10  -2    1.90    0.48
   6  10  -2    1.83    0.97
   6  10  -1    5.46    0.70
   6  10  -1    5.78    1.13
   6  10   0    0.59    0.45
   6  10   0    1.31    0.68
   6  10   1    0.43    0.69
   6  10   1    0.70    0.60
   6  10   2   18.12    1.31
   6  10   2   17.68    1.27
   6  10   3    2.58    0.82
   6  10   3    3.62    0.73
   6  10   4    0.01    0.58
   6  10   4   -0.05    0.28
   6  10   5   44.39    1.69
   6  10   5   40.78    2.32
   6  10   5   42.36    2.22
   6  10   6   19.79    1.02
   6  10   6   17.59    1.70
   6  10   6   17.81    1.67
   6  10   7    5.29    1.27
   6  10   7    5.84    1.90
   6  10   8    2.03    0.91
   6  10   8    0.05    0.88
   6  10   9   -0.20    0.67
   6  10   9   -0.01    0.99
   6  10  10   30.30    2.72
   6  10  10   32.72    2.59
   6  10  11    0.00    0.54
   6  10  11   -0.03    0.54
   6  10  12    0.01    0.52
   6  10  12    0.01    0.50
   6  10  13    0.01    0.56
   6  10  13    0.00    0.82
   6  10  14    0.05    1.03
   6  10  14    0.00    0.68
   6  11  -8    0.21    1.02
   6  11  -7    0.18    0.90
   6  11  -6   -0.11    0.78
   6  11  -5    0.54    0.32
   6  11  -5   -0.01    1.50
   6  11  -4    0.51    0.33
   6  11  -4    0.39    1.39
   6  11  -3    1.29    0.63
   6  11  -3    0.26    1.53
   6  11  -2    0.74    0.39
   6  11  -2    1.46    1.36
   6  11  -1   29.37    1.34
   6  11  -1   26.95    2.10
   6  11   0   20.85    1.23
   6  11   0   20.41    1.78
   6  11   1    0.94    0.76
   6  11   1    0.75    0.69
   6  11   2    1.17    0.96
   6  11   2    1.48    0.72
   6  11   3    4.15    0.84
   6  11   3    3.47    0.94
   6  11   3    3.74    1.36
   6  11   4    5.12    1.25
   6  11   4    4.79    1.06
   6  11   4    5.63    1.53
   6  11   5    1.88    0.62
   6  11   5    2.28    0.89
   6  11   5    1.89    0.83
   6  11   6   16.54    1.74
   6  11   6   21.10    1.77
   6  11   7    1.31    1.47
   6  11   7    1.51    1.46
   6  11   8    0.57    0.74
   6  11   8    0.01    0.72
   6  11   9    0.53    0.84
   6  11   9    0.01    1.24
   6  11  10    0.00    0.54
   6  11  10    0.03    0.55
   6  11  11    0.00    0.55
   6  11  11    0.02    0.53
   6  11  12    0.00    0.61
   6  11  12   -0.03    0.58
   6  11  13    0.00    0.65
   6  11  13    0.04    0.63
   6  11  14    0.00    2.68
   6  11  14    5.88    2.76
   6  12  -6    0.36    1.05
   6  12  -5    0.22    0.90
   6  12  -4    0.09    0.75
   6  12  -3   -0.21    0.28
   6  12  -3   -0.03    0.75
   6  12  -2    0.12    0.31
   6  12  -2    0.73    0.73
   6  12  -1   12.07    2.59
   6  12  -1   12.91    1.32
   6  12   0   23.68    1.96
   6  12   0   19.42    1.51
   6  12   0   23.86    1.34
   6  12   1    3.97    1.09
   6  12   1    2.81    0.91
   6  12   1    4.37    0.74
   6  12   2    0.06    0.49
   6  12   2   -0.07    0.74
   6  12   2    0.32    0.58
   6  12   3   18.61    1.55
   6  12   3   17.79    1.59
   6  12   3   17.65    2.05
   6  12   4    1.83    0.88
   6  12   4    1.58    0.81
   6  12   5    8.53    2.19
   6  12   5    9.90    1.33
   6  12   6   -0.12    0.63
   6  12   6   -0.24    0.61
   6  12   7    9.39    1.61
   6  12   7   11.93    1.59
   6  12   8    0.04    0.47
   6  12   8   -0.07    0.48
   6  12   9    3.83    1.39
   6  12   9    3.91    1.34
   6  12  10   -0.01    0.50
   6  12  10    0.02    0.49
   6  12  11    0.00    0.49
   6  12  11    0.00    0.49
   6  12  12    0.00    0.56
   6  12  12    0.01    0.54
   6  12  13    4.95    2.31
   6  12  13    0.01    1.46
   6  13  -5   -0.39    1.04
   6  13  -4   -0.18    0.89
   6  13  -3   -0.41    0.93
   6  13  -2    0.94    0.76
   6  13  -2    0.06    0.41
   6  13  -2    0.16    0.30
   6  13  -1   -0.26    0.56
   6  13  -1    0.02    0.34
   6  13  -1    0.12    0.26
   6  13   0    3.95    1.81
   6  13   0    1.62    0.79
   6  13   0    3.66    1.00
   6  13   1    1.94    1.00
   6  13   1    1.51    0.79
   6  13   1    2.01    0.65
   6  13   2    0.43    0.75
   6  13   2    0.04    1.00
   6  13   2    0.86    0.53
   6  13   3    1.24    0.81
   6  13   3    1.34    0.71
   6  13   4    6.41    1.37
   6  13   4    8.53    1.24
   6  13   5    0.22    0.68
   6  13   5    0.32    0.62
   6  13   6    0.97    0.85
   6  13   6    0.59    0.84
   6  13   7    4.35    1.33
   6  13   7    3.85    1.28
   6  13   8    5.38    1.55
   6  13   8    6.49    1.52
   6  13   9   -0.31    0.61
   6  13   9    0.23    0.61
   6  13  10    0.18    0.82
   6  13  10    0.12    1.27
   6  13  11    0.00    0.57
   6  13  11    0.01    0.55
   6  14  -3    5.86    1.84
   6  14  -2    4.76    1.64
   6  14  -1    1.01    1.10
   6  14   0    0.33    1.05
   6  14   0    1.85    0.56
   6  14   1    3.52    1.47
   6  14   1    4.71    1.30
   6  14   2    0.24    0.39
   6  14   2   -0.13    0.34
   6  14   3    0.64    0.64
   6  14   3    0.65    0.73
   6  14   4    1.98    0.92
   6  14   4    0.99    0.84
   6  14   5    1.69    0.97
   6  14   5    1.48    0.92
   6  14   6    1.32    1.36
   6  14   6    0.69    1.51
   6  14   7    1.48    1.05
   6  14   7    1.37    1.09
   6  14   8    3.52    1.48
   6  14   8    4.20    2.20
   6  14   9    0.60    1.04
   6  14   9    0.58    1.01
   6  14  10    4.29    1.58
   6  14  10    3.09    2.58
   6  15   2    0.32    0.68
   6  15   2    0.92    0.88
   6  15   3    1.38    0.89
   6  15   3    1.51    1.21
   6  15   4    0.87    0.89
   6  15   4    1.47    1.27
   6  15   5    5.65    1.44
   6  15   5    8.39    2.07
   6  15   6    1.74    1.05
   6  15   6    0.83    0.96
   6  15   7    0.21    1.68
   6  15   7    1.40    1.05
   7 -13  -1    0.00    0.60
  -7  13   1    0.78    0.70
   7 -13   0    0.01    0.51
  -7  13   0    0.35    0.61
   7 -13   1   -0.04    0.73
  -7  13  -1    2.86    0.93
   7 -12  -5    4.14    1.29
  -7  12   5    3.97    1.30
   7 -12  -4    1.28    0.97
  -7  12   4    2.74    1.06
   7 -12  -3    1.81    0.91
  -7  12   3    1.81    1.00
   7 -12  -2    4.62    1.13
  -7  12   2    5.74    1.26
   7 -12  -1    0.02    0.44
  -7  12   1    0.20    0.54
   7 -12   0   -0.06    0.28
  -7  12   0    0.08    0.35
   7 -12   1    9.99    1.16
  -7  12  -1    9.61    2.26
   7 -12   2    1.32    0.89
  -7  12  -2   -0.02    1.29
   7 -12   3    0.14    0.38
  -7  12  -3    0.06    0.57
   7 -12   4    1.93    0.60
  -7  12  -4   -0.01    0.91
   7 -12   5    1.08    0.53
  -7  12  -5    0.04    0.85
   7 -11  -7    2.78    1.06
  -7  11   7    0.00    1.01
   7 -11  -6    6.40    1.61
  -7  11   6    0.00    1.12
   7 -11  -5    0.14    0.53
  -7  11   5   -0.11    0.82
   7 -11  -4   -0.07    0.64
  -7  11   4    0.69    0.67
   7 -11  -3    1.33    0.80
  -7  11   3    2.28    1.39
   7 -11  -2   17.40    1.48
  -7  11   2   16.58    1.70
   7 -11  -1    1.94    1.12
  -7  11   1    1.27    0.90
   7 -11   0    0.00    0.34
  -7  11   0    0.23    0.70
   7 -11   1    2.96    0.76
  -7  11  -1    2.27    1.49
   7 -11   2    2.40    1.01
  -7  11  -2    1.62    0.92
   7 -11   3   -0.06    0.31
  -7  11  -3   -0.03    0.74
   7 -11   4   -0.27    0.40
  -7  11  -4   -0.04    0.98
   7 -11   5   17.60    1.66
  -7  11  -5   15.27    1.69
   7 -11   6    1.42    0.51
  -7  11  -6   -0.01    0.84
  -7  11  -7    0.03    0.44
   7 -10  -8    0.30    0.70
  -7  10   8    0.00    0.67
   7 -10  -7    0.18    0.57
  -7  10   7    0.00    0.60
   7 -10  -6   11.04    1.54
  -7  10   6   11.43    1.59
   7 -10  -5    1.17    0.97
  -7  10   5    0.00    0.72
   7 -10  -4   -1.01    0.57
  -7  10   4    0.57    0.68
   7 -10  -3    3.26    1.37
  -7  10   3    2.77    1.01
   7 -10  -2    6.01    0.99
  -7  10   2    6.05    1.20
   7 -10  -1    4.57    0.87
  -7  10   1    3.65    1.66
   7 -10   0    0.02    0.37
  -7  10   0    0.21    0.48
   7 -10   1    3.31    0.75
  -7  10  -1    3.45    0.97
   7 -10   2    5.72    1.25
  -7  10  -2    5.88    1.18
   7 -10   3    0.50    0.42
  -7  10  -3   -0.02    0.63
   7 -10   4    1.45    0.73
  -7  10  -4   -0.04    0.73
   7 -10   5    2.13    0.57
  -7  10  -5    0.02    1.45
   7 -10   6   11.47    0.94
  -7  10  -6   10.23    1.45
   7 -10   7   -0.17    0.49
  -7  10  -7   -0.02    0.53
   7 -10   8    1.64    0.53
   7  -9  -9    7.87    1.46
  -7   9   9    0.00    1.31
   7  -9  -8    2.78    1.01
  -7   9   8    0.00    0.99
   7  -9  -7   -0.04    0.45
  -7   9   7    0.00    0.74
   7  -9  -6    3.34    0.88
  -7   9   6    0.00    0.96
   7  -9  -5   11.28    1.29
  -7   9   5   10.11    1.43
   7  -9  -4    0.78    0.60
  -7   9   4    0.57    0.74
   7  -9  -3   -0.33    0.43
  -7   9   3    0.08    0.53
   7  -9  -2   13.30    1.70
  -7   9   2   10.74    1.36
   7  -9  -1    2.40    0.71
  -7   9   1    1.25    1.38
   7  -9   0    2.33    1.02
  -7   9   0    2.06    0.85
   7  -9   1    1.62    0.60
  -7   9  -1    1.33    0.78
   7  -9   2    8.95    1.30
  -7   9  -2    6.23    1.18
   7  -9   3   10.11    0.85
  -7   9  -3   -0.02    1.19
   7  -9   4    2.56    0.83
  -7   9  -4   -0.02    0.78
   7  -9   5    0.52    0.42
  -7   9  -5    0.04    1.03
   7  -9   6   13.23    1.40
  -7   9  -6   10.05    1.44
   7  -9   7   -0.02    0.25
  -7   9  -7   -0.02    0.41
   7  -9   8    0.01    0.23
   7  -9   9    0.01    0.35
   7  -9  10    0.04    0.32
   7  -8 -10    5.15    1.36
  -7   8  10    0.00    1.20
   7  -8  -9    2.28    1.41
  -7   8   9    0.00    0.88
   7  -8  -8    4.17    1.06
  -7   8   8    0.00    1.03
   7  -8  -7    0.52    0.66
  -7   8   7    0.00    1.12
   7  -8  -6    3.12    0.83
  -7   8   6    0.00    0.92
   7  -8  -5    1.78    0.67
  -7   8   5    0.00    0.77
   7  -8  -4    6.00    0.93
  -7   8   4    4.58    1.13
   7  -8  -3   11.19    1.04
  -7   8   3    7.33    1.27
   7  -8  -2    0.93    0.57
  -7   8   2    1.42    0.75
   7  -8  -1   24.31    1.31
  -7   8   1   18.98    2.29
   7  -8   0   13.15    1.06
  -7   8   0    9.63    1.27
   7  -8   1    0.24    0.32
  -7   8  -1   -0.23    0.41
   7  -8   2    2.56    0.97
  -7   8  -2    2.19    0.87
   7  -8   3   16.40    1.07
  -7   8  -3   11.17    1.43
   7  -8   4    0.85    0.67
  -7   8  -4    0.01    0.62
   7  -8   5    2.04    0.55
  -7   8  -5   -0.01    0.83
   7  -8   6   16.31    1.45
  -7   8  -6    0.01    2.16
[truncated: 120,990 more chars]
